# Supplementary material for: Prognostic value of RNA methylation-related genes in gastric adenocarcinoma based on bioinformatics
Source: PeerJ. 2024 Feb 29;12:e16951. doi: 10.7717/peerj.16951 (PMC10909369; doi:10.7717/peerj.16951)
Supplement: Supplemental Information 12 [file peerj-12-16951-s012.xlsx]

## Sheet: Sheet1
	logFC	AveExpr	t	P.Value	adj.P.Val	B	change
CST1	4.29379	4.38208	10.2086	6.23139e-22	4.25028e-20	39.0714	UP
CLDN3	3.00448	5.65166	6.92484	1.7152e-11	1.57623e-10	15.5231	UP
COL1A1	2.98839	7.90606	11.2912	6.73601e-26	1.25095e-23	48.0546	UP
SPP1	2.88017	4.64623	7.88727	2.88658e-14	4.29436e-13	21.7573	UP
CTHRC1	2.74968	3.90895	11.4112	2.3772e-26	5.2428e-24	49.0797	UP
GDF15	2.66813	4.64584	10.3953	1.33789e-22	1.09885e-20	40.5839	UP
COL10A1	2.65443	2.54948	8.56212	2.31684e-16	4.93725e-15	26.4807	UP
CLDN1	2.65336	4.04776	10.3251	2.39032e-22	1.83339e-20	40.0134	UP
CXCL1	2.62789	4.74551	7.8673	3.31557e-14	4.87371e-13	21.6218	UP
MMP11	2.60788	3.25816	9.13154	3.22198e-18	9.72615e-17	30.673	UP
BGN	2.59823	7.13398	11.0695	4.54828e-25	6.49678e-23	46.1751	UP
APOC1	2.55997	4.28739	9.38575	4.51403e-19	1.66009e-17	32.602	UP
UBE2C	2.52572	5.30121	11.0854	3.96838e-25	5.83767e-23	46.3093	UP
EPCAM	2.50745	7.31695	10.9411	1.36251e-24	1.72265e-22	45.0956	UP
TOP2A	2.50595	4.49849	11.7614	1.10111e-27	3.61752e-25	52.1041	UP
MYBL2	2.4941	4.72058	11.3095	5.74825e-26	1.10009e-23	48.2107	UP
TPX2	2.46925	4.53883	12.9184	3.19941e-32	4.50477e-29	62.3928	UP
MSLN	2.45104	4.00821	5.90386	7.50552e-09	4.46167e-08	9.61843	UP
CXCL8	2.42409	4.11835	7.00973	1.00081e-11	9.56736e-11	16.0478	UP
SOX9	2.41769	5.68607	13.2663	1.27732e-33	2.09821e-30	65.566	UP
MMP7	2.41023	3.65384	5.61424	3.66502e-08	1.93271e-07	8.08631	UP
CLDN4	2.36231	5.9954	9.25235	1.2715e-18	4.13594e-17	31.5855	UP
MMP1	2.31082	4.62081	6.05888	3.12974e-09	1.97041e-08	10.4651	UP
CXCL9	2.30816	4.03736	6.73789	5.52078e-11	4.64273e-10	14.3852	UP
SFRP4	2.30439	3.4575	6.30381	7.5791e-10	5.30576e-09	11.8399	UP
ECT2	2.30227	3.96414	13.6676	2.9854e-35	7.35602e-32	69.2672	UP
INHBA	2.28899	2.72124	11.1786	1.78081e-25	2.85392e-23	47.0978	UP
MUC13	2.28677	6.31953	6.49227	2.47102e-10	1.85769e-09	12.9281	UP
GRIN2D	2.23926	2.92994	9.69729	3.87958e-20	1.72239e-18	35.0118	UP
UBD	2.22815	3.76421	6.80729	3.58726e-11	3.11919e-10	14.8047	UP
KRT17	2.21811	3.36774	5.01293	8.02139e-07	3.36707e-06	5.11819	UP
GPRC5A	2.20945	5.58632	8.53625	2.80145e-16	5.8747e-15	26.2946	UP
NFE2L3	2.18478	3.82051	13.7735	1.10017e-35	3.61442e-32	70.2509	UP
MKI67	2.18222	3.96716	12.5696	7.80134e-31	6.68608e-28	59.2464	UP
MISP	2.16242	5.87787	8.40999	7.03939e-16	1.37659e-14	25.392	UP
SULF1	2.15837	4.00879	8.35172	1.07353e-15	2.04655e-14	24.9787	UP
LAMC2	2.15235	4.38215	8.90493	1.80468e-17	4.65017e-16	28.9829	UP
THBS2	2.14668	3.97699	7.56694	2.58612e-13	3.2532e-12	19.6144	UP
KRT18	2.14635	7.65624	9.29281	9.29699e-19	3.13269e-17	31.8928	UP
COL3A1	2.13694	7.66128	8.50279	3.57948e-16	7.31937e-15	26.0545	UP
ETV4	2.13568	3.22705	9.34953	5.98513e-19	2.13343e-17	32.3251	UP
FNDC1	2.10316	2.66263	7.45214	5.58475e-13	6.66787e-12	18.8626	UP
HOXC10	2.09717	2.00859	7.00929	1.00366e-11	9.58534e-11	16.0451	UP
ENC1	2.09518	4.21128	12.2984	9.10979e-30	6.19215e-27	56.8257	UP
CEMIP	2.08826	2.50611	8.09188	6.88014e-15	1.13206e-13	23.1601	UP
KRT7	2.07921	3.70486	5.1454	4.16468e-07	1.83697e-06	5.74691	UP
CLDN7	2.07212	5.72241	9.56009	1.15017e-19	4.69404e-18	33.9444	UP
MMP3	2.07113	2.47275	5.56033	4.88881e-08	2.52009e-07	7.80839	UP
APOE	2.06059	6.14242	7.08344	6.24429e-12	6.18841e-11	16.5075	UP
CXCL10	2.01449	3.90499	6.23305	1.14688e-09	7.81178e-09	11.4381	UP
MMP12	2.00242	3.62941	5.51903	6.08715e-08	3.09173e-07	7.59701	UP
FOXM1	1.99742	3.69745	11.3652	3.54615e-26	7.32418e-24	48.6861	UP
MARCKSL1	1.99047	7.20758	12.1802	2.63977e-29	1.60946e-26	55.7779	UP
IQGAP3	1.98496	3.17557	12.403	3.54056e-30	2.58487e-27	57.7565	UP
FGFR4	1.95758	3.61541	8.47883	4.26447e-16	8.61283e-15	25.883	UP
ANLN	1.95391	3.31568	12.6623	3.35176e-31	3.47737e-28	60.0786	UP
COL1A2	1.95216	6.85852	8.01485	1.18407e-14	1.87022e-13	22.6289	UP
CEP55	1.94917	3.29243	12.5575	8.71041e-31	7.15415e-28	59.1378	UP
CLDN2	1.94704	3.19904	5.01913	7.78137e-07	3.27609e-06	5.1473	UP
TREM2	1.94505	2.71544	9.16295	2.53193e-18	7.82278e-17	30.9095	UP
CKS2	1.93768	5.95412	10.4436	8.96252e-23	7.51784e-21	40.9779	UP
CENPF	1.93651	2.82559	11.7625	1.09046e-27	3.61752e-25	52.1137	UP
ADAMTS2	1.93275	2.89785	9.27792	1.04337e-18	3.48e-17	31.7795	UP
CDK1	1.93186	3.43802	11.9445	2.171e-28	9.10526e-26	53.7029	UP
SOX4	1.91061	4.75875	11.2651	8.43923e-26	1.47216e-23	47.8327	UP
COL5A2	1.90918	4.54166	9.61024	7.7394e-20	3.28084e-18	34.3335	UP
FCGR3A	1.9086	3.49609	7.99679	1.344e-14	2.10095e-13	22.505	UP
MEST	1.90364	3.33787	10.7291	8.21718e-24	8.43631e-22	43.3278	UP
TTYH3	1.89713	5.01132	11.3209	5.20698e-26	1.0261e-23	48.308	UP
UBE2T	1.89636	4.14858	11.4272	2.06653e-26	4.68223e-24	49.2176	UP
SERPINE1	1.89492	4.32501	7.43034	6.45777e-13	7.64079e-12	18.7208	UP
LRFN4	1.87832	3.63054	11.2244	1.20042e-25	2.00532e-23	47.486	UP
CDC20	1.85475	4.43103	9.49119	1.97806e-19	7.75584e-18	33.412	UP
HOXB9	1.84784	2.24113	7.67921	1.20816e-13	1.61678e-12	20.3579	UP
PMEPA1	1.83972	4.52493	8.04537	9.55269e-15	1.53092e-13	22.839	UP
GRB7	1.83047	3.8094	6.5997	1.28963e-10	1.01848e-09	13.56	UP
SAPCD2	1.82921	3.47744	9.59055	9.04368e-20	3.7689e-18	34.1805	UP
AURKA	1.8283	3.55053	10.2342	5.05172e-22	3.53119e-20	39.2777	UP
NUSAP1	1.81717	3.99045	11.4981	1.11394e-26	2.74474e-24	49.8259	UP
CDH17	1.80801	4.26668	4.00078	7.503e-05	0.000224056	0.802838	UP
PLAU	1.80025	4.19113	8.92267	1.57849e-17	4.13765e-16	29.1142	UP
CDCA7	1.79518	3.74808	8.85391	2.6495e-17	6.62779e-16	28.6063	UP
CHI3L1	1.79319	2.95184	6.61991	1.1401e-10	9.06194e-10	13.6799	UP
RECQL4	1.78111	2.92916	10.5869	2.71229e-23	2.47521e-21	42.1533	UP
KIF18B	1.77959	2.52994	12.0062	1.25371e-28	5.74724e-26	54.2436	UP
MELK	1.77291	2.99951	11.2779	7.55789e-26	1.35437e-23	47.9413	UP
COL4A1	1.76832	5.84675	10.0842	1.722e-21	1.03488e-19	38.0723	UP
RRM2	1.76695	3.92917	9.95271	5.00459e-21	2.69537e-19	37.0238	UP
NEK2	1.76507	2.72522	11.125	2.82645e-25	4.31899e-23	46.6432	UP
PLK1	1.76377	3.54639	10.6678	1.37682e-23	1.33694e-21	42.8202	UP
OLFM4	1.76344	6.1962	2.62491	0.00899423	0.0178364	-3.60413	UP
CT83	1.76233	1.78182	5.36035	1.396e-07	6.66295e-07	6.79754	UP
PBK	1.76084	3.16354	9.35788	5.60873e-19	2.00652e-17	32.3888	UP
CDH3	1.75876	2.64351	7.65199	1.45406e-13	1.91466e-12	20.1769	UP
C12orf75	1.74798	4.78009	8.38681	8.32806e-16	1.60629e-14	25.2273	UP
CEACAM6	1.74789	6.09486	3.64178	0.000305791	0.000813132	-0.513347	UP
MMP9	1.74199	3.61305	6.46899	2.8418e-10	2.11626e-09	12.7923	UP
FAM83H	1.74018	5.30754	9.02365	7.34312e-18	2.06193e-16	29.8648	UP
MET	1.73956	3.94259	8.70994	7.77024e-17	1.79563e-15	27.5514	UP
CCNB1	1.73481	4.06375	10.3871	1.43244e-22	1.16679e-20	40.5168	UP
BUB1	1.73325	2.67003	11.7049	1.81371e-27	5.5003e-25	51.6128	UP
ATAD2	1.73226	3.08636	12.1605	3.15228e-29	1.82758e-26	55.6031	UP
PLA2G7	1.71838	2.61526	8.73663	6.37078e-17	1.49146e-15	27.7461	UP
ZWINT	1.71811	3.87318	10.8407	3.1994e-24	3.52327e-22	44.2557	UP
ASCL2	1.71542	3.09918	4.91	1.32202e-06	5.35548e-06	4.63968	UP
ATP11A	1.713	3.42804	11.1621	2.05366e-25	3.21284e-23	46.9575	UP
HOXA13	1.70957	1.87267	7.21281	2.70427e-12	2.85062e-11	17.3234	UP
IFI6	1.7081	7.642	6.07915	2.78787e-09	1.76987e-08	10.5772	UP
TSPAN8	1.70787	6.78508	4.92775	1.21362e-06	4.93458e-06	4.72157	UP
TRIP13	1.70563	2.58402	11.0045	7.93132e-25	1.08571e-22	45.6279	UP
CDC6	1.70363	2.59427	8.72836	6.77546e-17	1.5787e-15	27.6857	UP
CDCA8	1.7	3.52492	10.8462	3.0542e-24	3.38227e-22	44.3014	UP
EPHB2	1.69377	2.58728	7.36924	9.68654e-13	1.11271e-11	18.3251	UP
KLK6	1.69213	2.50956	3.87608	0.000123754	0.000355086	0.332612	UP
FERMT1	1.68582	4.18123	8.2818	1.77683e-15	3.23107e-14	24.4853	UP
KIF2C	1.68539	3.0107	11.0657	4.69857e-25	6.66318e-23	46.1431	UP
KIF11	1.6845	3.22144	11.9738	1.67343e-28	7.171e-26	53.9592	UP
AGRN	1.68332	4.8864	10.3472	1.99158e-22	1.54559e-20	40.1928	UP
SKA3	1.68205	2.69104	10.88	2.29191e-24	2.59644e-22	44.5839	UP
IGF2BP2	1.68034	3.49547	8.70899	7.82535e-17	1.80624e-15	27.5445	UP
HOXA10	1.67884	1.82197	8.20394	3.10313e-15	5.37985e-14	23.9394	UP
CCNA2	1.67295	3.72772	9.77775	2.04212e-20	9.58437e-19	35.6422	UP
CCNB2	1.66883	3.53177	10.7717	5.73747e-24	6.11336e-22	43.6812	UP
KIF20A	1.66647	2.75594	11.3198	5.25751e-26	1.0261e-23	48.2985	UP
LIF	1.66575	2.567	9.47305	2.28074e-19	8.78084e-18	33.2722	UP
TRIM31	1.66298	3.65041	6.14578	1.90189e-09	1.24967e-08	10.9477	UP
TROAP	1.65798	2.58959	10.9384	1.39437e-24	1.73408e-22	45.0728	UP
HNF4A	1.65712	4.03076	7.21739	2.62481e-12	2.77428e-11	17.3525	UP
TIMP1	1.65328	8.16288	8.65492	1.16863e-16	2.60588e-15	27.1514	UP
KPNA2	1.64827	5.16576	11.5326	8.2371e-27	2.19419e-24	50.123	UP
PRC1	1.64716	3.11273	11.3284	4.88085e-26	9.71832e-24	48.3717	UP
E2F1	1.64389	3.19773	10.6806	1.23589e-23	1.21203e-21	42.9264	UP
THY1	1.64314	4.03735	8.43115	6.03594e-16	1.19339e-14	25.5426	UP
BUB1B	1.64268	2.53508	11.4405	1.84171e-26	4.27103e-24	49.331	UP
CCL20	1.63985	4.10108	4.31446	2.01173e-05	6.68045e-05	2.0461	UP
TMC5	1.63027	4.44198	6.59514	1.32592e-10	1.04379e-09	13.5331	UP
RCC2	1.62962	5.33965	13.7005	2.19049e-35	6.16842e-32	69.5723	UP
OLFML2B	1.62732	3.29637	7.40977	7.4042e-13	8.68759e-12	18.5873	UP
PHLDA2	1.62698	5.69624	6.40499	4.16554e-10	3.02214e-09	12.4209	UP
ASF1B	1.62578	3.63899	10.0842	1.72196e-21	1.03488e-19	38.0723	UP
VIL1	1.61914	3.86701	5.38697	1.21622e-07	5.86307e-07	6.93024	UP
CDCA5	1.61646	2.72193	10.7167	9.12063e-24	9.21979e-22	43.2252	UP
COL12A1	1.61482	4.09994	7.38011	9.0136e-13	1.04026e-11	18.3953	UP
HMMR	1.61298	2.59344	10.7884	4.98167e-24	5.39554e-22	43.8201	UP
HMGB3	1.6116	3.36324	10.5199	4.74729e-23	4.14064e-21	41.6028	UP
CXCL5	1.61149	3.69447	3.27419	0.00115045	0.00275986	-1.74069	UP
RFC3	1.60988	3.27764	11.3923	2.80064e-26	5.873e-24	48.9184	UP
MXRA5	1.60664	4.35454	7.23445	2.34848e-12	2.50369e-11	17.461	UP
SEZ6L2	1.60284	4.21264	7.43609	6.2155e-13	7.37628e-12	18.7581	UP
ARHGAP11A	1.59235	2.57351	11.9169	2.77693e-28	1.11712e-25	53.4605	UP
DLGAP5	1.59225	2.64519	10.938	1.39874e-24	1.73408e-22	45.0697	UP
IL17RB	1.5878	2.84477	9.1086	3.8408e-18	1.14021e-16	30.5007	UP
CXCL3	1.58566	3.37222	5.63846	3.21764e-08	1.71468e-07	8.21194	UP
LMNB1	1.58535	3.8957	9.96879	4.39441e-21	2.37974e-19	37.1516	UP
KIF4A	1.58522	2.46777	11.0638	4.77879e-25	6.72853e-23	46.1265	UP
LY6E	1.58332	6.80913	7.13809	4.39094e-12	4.46846e-11	16.8508	UP
ESM1	1.58259	1.58671	9.58184	9.68743e-20	4.00332e-18	34.113	UP
F2R	1.57782	4.11576	9.71122	3.47247e-20	1.55567e-18	35.1207	UP
HPDL	1.57672	2.83004	7.26099	1.97451e-12	2.13959e-11	17.6302	UP
SPARC	1.5761	7.21177	7.84795	3.79115e-14	5.50709e-13	21.4908	UP
KIF23	1.57596	2.29183	11.8697	4.22022e-28	1.54054e-25	53.0484	UP
HJURP	1.57554	2.38922	11.0388	5.91874e-25	8.15876e-23	45.9159	UP
AURKB	1.57345	3.12996	9.35913	5.55454e-19	2.00167e-17	32.3983	UP
SERPINH1	1.57152	5.2376	11.3645	3.56697e-26	7.32418e-24	48.6803	UP
RAD51AP1	1.56702	2.50855	11.5098	1.00526e-26	2.54047e-24	49.9269	UP
MDK	1.56276	6.5939	6.95704	1.39907e-11	1.3052e-10	15.7215	UP
CPXM1	1.56154	2.54275	7.62995	1.68875e-13	2.19872e-12	20.0307	UP
MTHFD1L	1.56129	2.66319	14.8696	3.09903e-40	2.03627e-36	80.5761	UP
SLC17A9	1.56052	2.84297	7.36027	1.02781e-12	1.17111e-11	18.2672	UP
CLRN3	1.55656	3.38959	5.09662	5.31023e-07	2.3041e-06	5.51371	UP
MUC3A	1.55564	3.76159	4.56119	6.74533e-06	2.42901e-05	3.084	UP
KIAA0101	1.55543	2.97118	10.0855	1.70466e-21	1.03392e-19	38.0822	UP
SPAG5	1.55417	2.70732	10.7672	5.95884e-24	6.31509e-22	43.6439	UP
MCM4	1.55285	3.93988	10.3398	2.11696e-22	1.63645e-20	40.1328	UP
MCM2	1.55274	3.60614	10.2911	3.16371e-22	2.37122e-20	39.7378	UP
SDS	1.54842	2.06687	8.94925	1.29117e-17	3.44404e-16	29.3113	UP
LSR	1.5481	6.57445	8.30549	1.4984e-15	2.76819e-14	24.6522	UP
STIL	1.54341	2.16883	11.8956	3.35448e-28	1.32247e-25	53.2744	UP
DTL	1.54305	2.36086	11.7102	1.73024e-27	5.32913e-25	51.6592	UP
BIRC5	1.54004	3.05304	9.3582	5.59479e-19	2.00652e-17	32.3913	UP
KIFC1	1.53929	3.03916	9.79514	1.77698e-20	8.56425e-19	35.7788	UP
FANCI	1.5391	2.58427	11.6771	2.31699e-27	6.8168e-25	51.3717	UP
NUF2	1.53365	2.25054	10.8711	2.47149e-24	2.78389e-22	44.5097	UP
SERPINA1	1.52691	5.66038	4.05361	6.04589e-05	0.000184113	1.00618	UP
CDC25B	1.52648	4.60386	8.95894	1.19987e-17	3.21794e-16	29.3832	UP
CXCL11	1.52601	2.24793	5.49882	6.77328e-08	3.41122e-07	7.49406	UP
HMGA1	1.52528	7.47546	7.87369	3.1719e-14	4.67997e-13	21.6652	UP
CKAP2	1.52429	3.35045	10.5603	3.38917e-23	3.05056e-21	41.9342	UP
TYMS	1.51784	3.76964	9.73848	2.79426e-20	1.28094e-18	35.3341	UP
TRIB3	1.51774	2.78138	6.54926	1.75185e-10	1.34945e-09	13.2623	UP
NCAPH	1.51668	2.65472	10.2903	3.18604e-22	2.37891e-20	39.7308	UP
PRR11	1.51657	2.94377	11.2903	6.79035e-26	1.25095e-23	48.0467	UP
TNS4	1.51559	3.29696	3.85121	0.000136524	0.000387887	0.240512	UP
PABPC1L	1.51322	2.10029	8.50786	3.44899e-16	7.08931e-15	26.0909	UP
PPP1R1B	1.51144	3.93391	3.77044	0.000187153	0.000519418	-0.0548998	UP
MFI2	1.51003	2.03297	7.30759	1.45454e-12	1.6135e-11	17.9284	UP
VCAN	1.50833	3.46347	7.28613	1.67468e-12	1.8401e-11	17.7909	UP
IDO1	1.50281	2.39134	4.52531	7.93165e-06	2.82167e-05	2.92983	UP
COL5A1	1.50223	4.67813	6.8677	2.45812e-11	2.20147e-10	15.1726	UP
CDT1	1.50143	3.16717	8.63825	1.32196e-16	2.91156e-15	27.0306	UP
MFAP2	1.49976	2.65494	7.06513	7.02289e-12	6.88047e-11	16.393	UP
EPS8L3	1.49806	4.33159	6.22936	1.17182e-09	7.9679e-09	11.4172	UP
GGH	1.49781	3.33394	6.7821	4.19659e-11	3.5951e-10	14.652	UP
HKDC1	1.4956	2.80708	6.18654	1.50275e-09	1.00142e-08	11.1761	UP
MAGEA3	1.49044	1.39491	4.0328	6.58444e-05	0.000198916	0.92579	UP
GINS1	1.49028	2.38385	10.7247	8.52867e-24	8.71073e-22	43.2912	UP
SNX10	1.48897	2.67054	9.86653	1.00231e-20	5.05309e-19	36.3414	UP
TEAD4	1.48877	3.40757	12.216	1.91342e-29	1.25725e-26	56.0948	UP
PLEKHS1	1.48656	2.62176	5.82067	1.19127e-08	6.8382e-08	9.17169	UP
KCNE3	1.48564	4.18987	5.71428	2.13455e-08	1.174e-07	8.60815	UP
CCNE1	1.48153	2.40767	6.09429	2.5566e-09	1.63995e-08	10.6611	UP
PKMYT1	1.48152	2.33977	10.0149	3.02406e-21	1.70315e-19	37.5188	UP
CST2	1.48117	1.80358	5.97793	4.95288e-09	3.0292e-08	10.0207	UP
PCNA	1.47913	6.36607	9.82441	1.40552e-20	6.89197e-19	36.0092	UP
ASPM	1.47766	2.07122	10.8989	1.95174e-24	2.29004e-22	44.742	UP
PYCR1	1.47492	4.67253	7.87399	3.16525e-14	4.67717e-13	21.6672	UP
PLOD3	1.46979	4.47844	10.4791	6.67129e-23	5.74255e-21	41.2682	UP
GTSE1	1.46804	2.32086	10.6323	1.85506e-23	1.75802e-21	42.5269	UP
HSPD1	1.46612	6.18699	10.994	8.68101e-25	1.17662e-22	45.5391	UP
ADAMTS12	1.46571	1.72215	9.00644	8.36929e-18	2.3236e-16	29.7365	UP
RUNX1	1.46453	2.98348	12.6262	4.65685e-31	4.24338e-28	59.7546	UP
UHRF1	1.4644	2.32135	10.4016	1.26968e-22	1.04719e-20	40.6354	UP
PIK3AP1	1.45821	3.01572	8.75268	5.65259e-17	1.33442e-15	27.8634	UP
BAMBI	1.45464	2.52407	5.28821	2.0229e-07	9.42012e-07	6.44072	UP
FKBP10	1.45147	4.04439	5.95276	5.70687e-09	3.44861e-08	9.88351	UP
TNFRSF12A	1.45119	4.8041	7.65493	1.42528e-13	1.87801e-12	20.1964	UP
MAD2L1	1.45025	2.49092	10.2026	6.54732e-22	4.45037e-20	39.0228	UP
RP11-1220K2.2	1.44974	2.50444	4.83666	1.87757e-06	7.39623e-06	4.30411	UP
TIMELESS	1.44417	2.89143	11.4104	2.39373e-26	5.2428e-24	49.0729	UP
CDKN3	1.44277	3.03758	9.17816	2.25262e-18	7.0594e-17	31.0242	UP
CXCL16	1.44154	5.85721	8.8559	2.61026e-17	6.53793e-16	28.6209	UP
DSG2	1.43879	5.5108	6.70847	6.62082e-11	5.46752e-10	14.2084	UP
FOXS1	1.43822	1.93864	8.53035	2.92522e-16	6.11474e-15	26.2523	UP
PAQR4	1.43781	3.16433	9.16091	2.57194e-18	7.92159e-17	30.8941	UP
TTK	1.43663	2.21818	9.74361	2.68229e-20	1.23248e-18	35.3743	UP
TNFRSF10B	1.43383	3.73022	11.393	2.78399e-26	5.873e-24	48.9243	UP
MAL2	1.4294	6.34259	6.49035	2.49973e-10	1.87641e-09	12.9169	UP
COL11A1	1.42551	1.37568	6.07422	2.86742e-09	1.81686e-08	10.5499	UP
DSCC1	1.42455	2.31669	10.9255	1.55633e-24	1.89373e-22	44.9647	UP
NDC80	1.42323	2.27247	10.9172	1.67106e-24	1.99635e-22	44.8947	UP
KRT8	1.42056	8.17865	6.07111	2.91891e-09	1.8483e-08	10.5327	UP
COMP	1.41798	1.77381	4.79771	2.25819e-06	8.80233e-06	4.12769	UP
PRSS22	1.41697	3.35479	6.03822	3.52042e-09	2.19951e-08	10.3512	UP
RHPN2	1.41562	4.16871	7.11353	5.1451e-12	5.16396e-11	16.6963	UP
CCL18	1.41436	3.53209	4.18124	3.55386e-05	0.000113008	1.5076	UP
ABHD11	1.41391	4.32804	9.02586	7.22074e-18	2.03046e-16	29.8813	UP
AGT	1.41342	3.69856	4.7965	2.2711e-06	8.84742e-06	4.12224	UP
AGR2	1.4119	7.89908	3.52772	0.000467043	0.0012014	-0.907339	UP
NCAPG	1.41174	2.27999	10.114	1.3513e-21	8.48306e-20	38.3105	UP
METTL7B	1.40959	3.79126	5.86305	9.42076e-09	5.50228e-08	9.39861	UP
DEPDC1B	1.40904	2.21324	10.015	3.02148e-21	1.70315e-19	37.5197	UP
PTTG1	1.40749	3.80643	8.18056	3.66618e-15	6.28963e-14	23.7762	UP
DKC1	1.40731	4.14747	12.8633	5.31272e-32	6.98162e-29	61.8931	UP
IGFBP3	1.40265	5.27226	6.80652	3.60461e-11	3.13014e-10	14.8	UP
PDGFRB	1.40248	4.38997	7.48234	4.56464e-13	5.52013e-12	19.0595	UP
STAT1	1.40207	5.57385	8.35031	1.08459e-15	2.06366e-14	24.9686	UP
CDC45	1.40078	2.34848	10.0844	1.72028e-21	1.03488e-19	38.0732	UP
MTHFD2	1.39941	3.75898	11.2806	7.38527e-26	1.33558e-23	47.964	UP
ATHL1	1.39791	2.72123	7.21113	2.73407e-12	2.87588e-11	17.3127	UP
CDCA2	1.39626	2.02392	9.87554	9.32227e-21	4.7361e-19	36.4126	UP
OAS3	1.39388	4.21214	7.79362	5.5168e-14	7.80109e-13	21.124	UP
SLC12A7	1.39036	4.62741	9.10133	4.06043e-18	1.20179e-16	30.4461	UP
PRR7	1.38738	2.96877	8.54403	2.64598e-16	5.58432e-15	26.3506	UP
CENPA	1.38629	2.2925	9.73026	2.98354e-20	1.36138e-18	35.2697	UP
CLSPN	1.38518	1.81048	12.1297	4.15455e-29	2.27485e-26	55.3312	UP
TSPAN13	1.38507	5.55292	7.44342	5.91908e-13	7.0372e-12	18.8058	UP
SERPINB5	1.38425	3.85523	4.06737	5.71295e-05	0.00017473	1.05956	UP
PODXL	1.38375	3.88003	10.0947	1.58125e-21	9.71014e-20	38.1561	UP
ONECUT2	1.38288	2.05664	6.0755	2.84654e-09	1.80473e-08	10.557	UP
WDR72	1.38243	1.54746	6.43146	3.55735e-10	2.61412e-09	12.5742	UP
C2CD4A	1.38128	1.95406	5.91886	6.90173e-09	4.11889e-08	9.69957	UP
LAMB3	1.38083	5.21335	6.2066	1.33769e-09	9.00871e-09	11.2889	UP
COL8A1	1.37821	2.59415	5.81105	1.25625e-08	7.19235e-08	9.12035	UP
NME1	1.37649	3.89731	9.34047	6.42198e-19	2.26864e-17	32.2559	UP
PRR15L	1.3734	5.50937	6.00333	4.29071e-09	2.64556e-08	10.1596	UP
IER5L	1.37213	3.60624	7.60836	1.9548e-13	2.51849e-12	19.8878	UP
EZH2	1.37089	2.59196	10.7804	5.33065e-24	5.74196e-22	43.7535	UP
SLC52A2	1.37071	4.56066	9.97951	4.02953e-21	2.21254e-19	37.2368	UP
BAIAP2L2	1.37043	4.47258	6.11049	2.32981e-09	1.50772e-08	10.7511	UP
SLC29A2	1.36935	3.54231	9.01826	7.65033e-18	2.133e-16	29.8246	UP
TACC3	1.36914	3.14252	9.70803	3.56164e-20	1.592e-18	35.0958	UP
MDFI	1.36912	3.10461	7.14631	4.16382e-12	4.25271e-11	16.9026	UP
FAM60A	1.36722	3.5959	10.3296	2.30364e-22	1.77381e-20	40.0497	UP
FN1	1.36643	5.8028	4.68116	3.89403e-06	1.45847e-05	3.60751	UP
OSBPL3	1.36034	2.89959	12.0006	1.31706e-28	5.90044e-26	54.195	UP
NDC1	1.35897	3.43739	11.1709	1.90375e-25	3.02635e-23	47.0321	UP
ASPN	1.35441	3.92867	4.79223	2.31733e-06	9.01504e-06	4.10298	UP
RCC1	1.353	3.59734	9.8738	9.45348e-21	4.77813e-19	36.3989	UP
EXO1	1.35233	1.84791	11.0603	4.92199e-25	6.88101e-23	46.0974	UP
SLC6A14	1.35165	2.50597	4.38026	1.51056e-05	5.13736e-05	2.31778	UP
MCM7	1.3512	4.70524	8.87771	2.21528e-17	5.64912e-16	28.7818	UP
MYB	1.35086	2.21942	6.81298	3.4622e-11	3.02245e-10	14.8392	UP
SLC1A5	1.34785	5.15307	7.67886	1.21102e-13	1.61951e-12	20.3556	UP
OLR1	1.34734	1.60802	7.65797	1.39613e-13	1.84331e-12	20.2166	UP
PARP14	1.34365	3.64171	9.87862	9.0943e-21	4.65628e-19	36.4369	UP
ST14	1.3426	5.97394	7.19927	2.95343e-12	3.08025e-11	17.2375	UP
IL32	1.34031	5.21775	6.00785	4.18233e-09	2.58277e-08	10.1844	UP
MACC1	1.34014	2.86615	7.45536	5.46613e-13	6.53813e-12	18.8836	UP
CREB3L1	1.33931	5.60825	4.79625	2.27381e-06	8.85621e-06	4.1211	UP
PPM1H	1.33869	2.40079	8.91371	1.68901e-17	4.375e-16	29.0478	UP
ARSE	1.33781	2.6464	5.82425	1.168e-08	6.71242e-08	9.19076	UP
HNF1B	1.33768	2.44927	7.32442	1.30203e-12	1.45744e-11	18.0364	UP
SLC39A10	1.33446	2.32665	10.9546	1.21473e-24	1.58574e-22	45.2085	UP
GPX2	1.33407	7.54075	4.29315	2.20562e-05	7.27529e-05	1.95893	UP
SLC5A6	1.33303	3.25687	10.1088	1.40959e-21	8.79296e-20	38.269	UP
ESRP1	1.32976	4.65039	7.57283	2.48545e-13	3.13656e-12	19.6532	UP
DDX21	1.32842	4.87755	11.9868	1.48934e-28	6.52399e-26	54.074	UP
CSE1L	1.32688	5.20657	10.5911	2.62028e-23	2.42493e-21	42.1872	UP
COL6A3	1.32629	4.82675	5.97609	5.00446e-09	3.0598e-08	10.0106	UP
LGALS4	1.32423	6.75951	3.5206	0.000479382	0.00123138	-0.931549	UP
LOXL2	1.32323	3.4605	8.56933	2.19731e-16	4.69777e-15	26.5326	UP
REG4	1.3223	4.8182	2.38491	0.0175414	0.0324886	-4.1927	UP
WNT2	1.32191	1.33327	7.58451	2.29702e-13	2.92311e-12	19.7302	UP
C4orf48	1.3186	4.02123	5.83697	1.08866e-08	6.30423e-08	9.25877	UP
CYP2W1	1.31822	1.92783	3.67481	0.000269941	0.000726032	-0.397078	UP
BOP1	1.31624	4.19077	9.76853	2.19834e-20	1.02686e-18	35.5698	UP
NOTCH3	1.31527	4.35594	7.41087	7.35029e-13	8.62948e-12	18.5944	UP
HOXC11	1.31316	1.31239	7.68042	1.19822e-13	1.60502e-12	20.366	UP
ITGA2	1.31239	3.39942	7.39348	8.24965e-13	9.58827e-12	18.4818	UP
C2	1.31111	2.78405	6.99111	1.12685e-11	1.0679e-10	15.9323	UP
SLC4A11	1.30818	2.15272	6.28771	8.33083e-10	5.79454e-09	11.7482	UP
HELLS	1.30576	1.90192	11.5413	7.62938e-27	2.06014e-24	50.1985	UP
PUS7	1.30555	2.60039	10.7351	7.81219e-24	8.06251e-22	43.3775	UP
FAM91A1	1.30485	3.68099	12.1779	2.69441e-29	1.60946e-26	55.7577	UP
KRTCAP3	1.3041	4.43997	6.46141	2.97393e-10	2.20716e-09	12.7481	UP
PKDCC	1.30348	3.88486	5.71959	2.0738e-08	1.14282e-07	8.63603	UP
AGMAT	1.30346	3.14565	6.55356	1.70683e-10	1.31838e-09	13.2876	UP
RAB15	1.30259	3.05298	7.61421	1.87888e-13	2.42544e-12	19.9265	UP
CDKN2A	1.30251	2.0592	4.61896	5.18495e-06	1.89868e-05	3.33456	UP
TONSL	1.30219	2.65107	9.36892	5.14684e-19	1.87185e-17	32.4732	UP
TOMM34	1.30187	4.70312	10.0252	2.78163e-21	1.58472e-19	37.601	UP
ILDR1	1.30079	2.04832	9.2168	1.67304e-18	5.35372e-17	31.3161	UP
LMNB2	1.30062	4.24817	9.82956	1.34867e-20	6.62969e-19	36.0497	UP
SPC25	1.3002	2.41477	9.97267	4.25866e-21	2.32539e-19	37.1824	UP
ZWILCH	1.30015	2.55285	12.9761	1.88037e-32	2.85122e-29	62.9164	UP
DBF4	1.29839	2.42568	11.2196	1.25142e-25	2.07294e-23	47.445	UP
GPR56	1.29653	4.27035	7.59119	2.19568e-13	2.80865e-12	19.7743	UP
TFRC	1.29521	4.54849	7.16115	3.78244e-12	3.88129e-11	16.9962	UP
HOXC9	1.29299	1.28763	7.83979	4.01137e-14	5.80559e-13	21.4356	UP
F2RL2	1.29193	2.45891	6.70104	6.9313e-11	5.6999e-10	14.1638	UP
RIPK2	1.2918	3.27939	11.5137	9.71643e-27	2.48741e-24	49.9604	UP
CENPU	1.2905	2.55526	8.9767	1.04884e-17	2.85563e-16	29.5151	UP
KRT23	1.28749	1.68503	3.75853	0.000195971	0.00054202	-0.0979608	UP
TMEM2	1.28546	3.66129	9.14138	2.98776e-18	9.08868e-17	30.7471	UP
PLEKHG4	1.28534	1.83667	7.52176	3.50492e-13	4.30998e-12	19.3175	UP
LGR5	1.28475	1.83407	4.89094	1.44886e-06	5.8262e-06	4.55201	UP
TRIM15	1.28407	2.69145	6.15067	1.84901e-09	1.21655e-08	10.975	UP
HSPH1	1.28168	4.06939	8.88609	2.07997e-17	5.31781e-16	28.8436	UP
C6orf223	1.28022	1.45709	5.6095	3.75939e-08	1.97877e-07	8.06178	UP
KRT80	1.28008	2.2778	4.97395	9.70199e-07	4.01271e-06	4.93593	UP
PCSK9	1.27942	2.13882	5.20434	3.09745e-07	1.39846e-06	6.03123	UP
LLGL2	1.27406	4.50527	7.82149	4.55229e-14	6.51668e-13	21.3119	UP
KLF5	1.27315	6.27689	5.95501	5.6351e-09	3.41047e-08	9.89576	UP
PRKDC	1.27265	4.10837	9.98918	3.72608e-21	2.06897e-19	37.3137	UP
PAFAH1B3	1.27073	4.24674	8.58333	1.98229e-16	4.26582e-15	26.6336	UP
DPY19L1	1.27011	3.20588	10.2448	4.63106e-22	3.27196e-20	39.3632	UP
CENPW	1.26863	3.67713	8.20059	3.17841e-15	5.50069e-14	23.9159	UP
CDX2	1.26689	2.50702	4.26286	2.51218e-05	8.22021e-05	1.83569	UP
TNFRSF11B	1.26445	1.72832	5.30346	1.87094e-07	8.75801e-07	6.51582	UP
ELF3	1.26214	5.39531	6.24814	1.05021e-09	7.1947e-09	11.5235	UP
CENPE	1.2619	1.83499	10.0248	2.79153e-21	1.58578e-19	37.5975	UP
FEN1	1.26131	3.80823	9.92245	6.3892e-21	3.36749e-19	36.7838	UP
ADAM8	1.25931	2.73316	7.0436	8.06141e-12	7.82405e-11	16.2586	UP
VAV2	1.25723	3.58595	10.0098	3.15341e-21	1.77094e-19	37.4777	UP
MAGEA6	1.25568	1.1696	3.81769	0.000155721	0.000438637	0.117213	UP
PLAUR	1.2548	3.92584	6.81867	3.34127e-11	2.92465e-10	14.8738	UP
HOXB7	1.2548	3.43636	6.05233	3.2487e-09	2.03944e-08	10.429	UP
RARRES1	1.254	3.30237	4.77406	2.52444e-06	9.74575e-06	4.02121	UP
PRSS21	1.25348	1.66598	4.0258	6.77559e-05	0.000204314	0.89884	UP
BIK	1.25279	3.85462	6.25474	1.0105e-09	6.93555e-09	11.5609	UP
ISG15	1.25243	5.695	5.25246	2.42728e-07	1.11556e-06	6.26552	UP
STMN1	1.25223	4.17335	8.92645	1.53403e-17	4.02646e-16	29.1422	UP
RHPN1	1.25219	2.13669	8.56214	2.31648e-16	4.93725e-15	26.4809	UP
NOP2	1.25131	3.4517	12.1157	4.70976e-29	2.50916e-26	55.2077	UP
KIF18A	1.25056	1.73061	10.511	5.11305e-23	4.42055e-21	41.5298	UP
TMEM63A	1.25047	3.82948	9.44447	2.85302e-19	1.07944e-17	33.0524	UP
CCNF	1.25007	2.27311	10.0975	1.54558e-21	9.52076e-20	38.1785	UP
CSAG1	1.24929	1.21521	3.67591	0.000268821	0.000723412	-0.393196	UP
THEM6	1.2484	4.55145	7.98725	1.43699e-14	2.23567e-13	22.4395	UP
HSPE1	1.24743	5.56959	9.04663	6.16483e-18	1.7663e-16	30.0364	UP
CAD	1.24619	3.44424	10.8933	2.04661e-24	2.37926e-22	44.6953	UP
APLN	1.24574	1.58868	6.67384	8.19402e-11	6.64967e-10	14.001	UP
SPINT2	1.2434	5.87869	7.08625	6.13258e-12	6.08688e-11	16.5251	UP
ADAM12	1.24305	1.34367	7.41208	7.29175e-13	8.56585e-12	18.6022	UP
PTK7	1.24253	2.86043	6.37078	5.10426e-10	3.6654e-09	12.2236	UP
DARS2	1.24142	3.64116	9.53708	1.37891e-19	5.54715e-18	33.7663	UP
HSP90AA1	1.23707	7.59561	10.9553	1.20717e-24	1.58574e-22	45.2147	UP
RPP25	1.23554	3.57813	8.68894	9.08138e-17	2.06358e-15	27.3986	UP
SGOL1	1.23442	1.78908	10.5936	2.5657e-23	2.38561e-21	42.2079	UP
KIF14	1.23421	1.49648	11.2977	6.36591e-26	1.20658e-23	48.1102	UP
YDJC	1.23363	4.21663	8.92947	1.49953e-17	3.9517e-16	29.1645	UP
P3H4	1.23141	3.22062	7.01011	9.98436e-12	9.54933e-11	16.0502	UP
SKA1	1.23138	1.9435	9.36434	5.33364e-19	1.93622e-17	32.4382	UP
ARPC1B	1.23097	5.50089	8.43992	5.6627e-16	1.1241e-14	25.6052	UP
F5	1.23095	2.22332	4.44953	1.1129e-05	3.86426e-05	2.60784	UP
MCM3	1.23061	4.91616	10.0516	2.24613e-21	1.30223e-19	37.8111	UP
ADAP1	1.23013	3.03898	8.07519	7.74147e-15	1.26116e-13	23.0447	UP
MYO1B	1.23004	3.04733	9.83965	1.24384e-20	6.19157e-19	36.1292	UP
DEPDC1	1.22779	1.90894	9.26354	1.16611e-18	3.83105e-17	31.6704	UP
OAS2	1.22742	3.90327	5.77592	1.52412e-08	8.57894e-08	8.93355	UP
SYT13	1.22526	2.68139	4.22769	2.91917e-05	9.4456e-05	1.69361	UP
LAMP3	1.22479	2.2993	6.90317	1.96653e-11	1.78885e-10	15.3899	UP
MUC5B	1.22474	2.2367	3.14911	0.00175872	0.00405212	-2.13013	UP
PAICS	1.22467	4.04191	10.3662	1.70266e-22	1.3479e-20	40.3469	UP
TYMP	1.22398	4.7494	6.07934	2.78477e-09	1.76848e-08	10.5782	UP
RTKN	1.22184	3.45263	9.14895	2.81939e-18	8.58977e-17	30.804	UP
NCEH1	1.21985	3.63286	7.58201	2.33604e-13	2.96129e-12	19.7137	UP
NCAPD2	1.21904	4.26362	9.59641	8.63407e-20	3.62889e-18	34.2261	UP
LAD1	1.21866	5.88208	5.64545	3.09883e-08	1.65584e-07	8.24825	UP
EPHB4	1.21862	4.16895	9.15735	2.64331e-18	8.10341e-17	30.8673	UP
FAM111B	1.21751	2.21385	8.64293	1.27698e-16	2.82195e-15	27.0645	UP
HK2	1.21735	3.41549	5.93865	6.17745e-09	3.71363e-08	9.80684	UP
ATP13A3	1.21472	3.72334	10.7655	6.04399e-24	6.37108e-22	43.63	UP
EPSTI1	1.21454	3.11092	6.49293	2.46116e-10	1.85098e-09	12.932	UP
MTFR2	1.21406	1.74751	10.148	1.02327e-21	6.7012e-20	38.5838	UP
RNF43	1.21179	2.7557	5.60041	3.94705e-08	2.06706e-07	8.01478	UP
ARHGAP39	1.21172	2.3253	9.25536	1.24227e-18	4.06772e-17	31.6083	UP
ITPR3	1.21161	4.69074	7.34306	1.1515e-12	1.30376e-11	18.1563	UP
KIF12	1.21149	2.60933	5.8267	1.15225e-08	6.62576e-08	9.20389	UP
CEACAM5	1.20949	6.30715	2.41064	0.0163682	0.0305366	-4.13223	UP
NCAPG2	1.20857	2.35569	10.0907	1.63357e-21	1.00003e-19	38.1241	UP
MSX2	1.20723	2.45094	5.84276	1.05432e-08	6.12572e-08	9.28976	UP
PSAT1	1.20649	3.85781	5.34992	1.47331e-07	7.00921e-07	6.74568	UP
CKAP2L	1.20644	1.83413	10.295	3.06517e-22	2.30613e-20	39.7689	UP
TLCD1	1.20479	3.24636	6.84816	2.77853e-11	2.46603e-10	15.0534	UP
LACTB2	1.20368	4.25776	6.95909	1.38102e-11	1.29201e-10	15.7341	UP
KIF20B	1.20358	2.42755	10.8826	2.24162e-24	2.55415e-22	44.6057	UP
CCT6A	1.20309	5.45626	10.9326	1.46477e-24	1.80459e-22	45.0244	UP
MLEC	1.20307	5.45833	9.21781	1.66001e-18	5.32933e-17	31.3238	UP
SKP2	1.2029	3.12562	8.4124	6.9171e-16	1.35671e-14	25.4092	UP
SMC4	1.20266	3.29566	9.31121	8.06072e-19	2.73953e-17	32.0328	UP
GGCT	1.20163	4.33401	10.0422	2.42474e-21	1.39348e-19	37.7359	UP
TK1	1.20096	5.05755	6.75822	4.86749e-11	4.12147e-10	14.5077	UP
DNMT1	1.19991	3.345	11.0834	4.03873e-25	5.89714e-23	46.292	UP
XPO5	1.19892	3.1505	9.79282	1.81024e-20	8.66104e-19	35.7606	UP
ORC1	1.19744	1.97099	9.235	1.45385e-18	4.6904e-17	31.4539	UP
C19orf48	1.19446	3.97337	8.05433	8.96846e-15	1.44433e-13	22.9007	UP
FOXJ1	1.19378	1.59856	4.42911	1.21828e-05	4.21015e-05	2.52191	UP
RAD51	1.19366	2.09425	10.8283	3.55211e-24	3.88996e-22	44.1529	UP
UBE2S	1.19275	3.89272	7.09085	5.95386e-12	5.91843e-11	16.554	UP
ASPHD1	1.19151	2.51421	5.15697	3.93045e-07	1.74145e-06	5.80249	UP
KIF15	1.18956	1.76308	9.9809	3.98432e-21	2.19997e-19	37.2478	UP
EML4	1.18919	3.8991	11.6987	1.91493e-27	5.71926e-25	51.5593	UP
ZNF367	1.18903	2.24639	10.2894	3.20975e-22	2.38554e-20	39.7236	UP
KIF26B	1.18816	1.47965	8.28725	1.70851e-15	3.11545e-14	24.5237	UP
NOP56	1.18759	4.48304	10.2865	3.28554e-22	2.41659e-20	39.7006	UP
MROH6	1.18602	3.18962	5.42026	1.02281e-07	5.00288e-07	7.097	UP
ITGAX	1.18515	1.98503	7.80976	4.93587e-14	7.03005e-13	21.2328	UP
TNFAIP2	1.18436	4.29573	5.63757	3.23308e-08	1.72152e-07	8.20732	UP
CHDH	1.1838	2.51373	8.02776	1.08133e-14	1.72175e-13	22.7177	UP
IFITM1	1.18252	6.54887	4.87664	1.55158e-06	6.19251e-06	4.48648	UP
AJUBA	1.18142	2.29568	8.08044	7.45963e-15	1.21826e-13	23.081	UP
CBFB	1.18085	3.76408	11.8209	6.50632e-28	2.25004e-25	52.6222	UP
ZDHHC9	1.1792	4.42975	9.76291	2.29933e-20	1.06897e-18	35.5256	UP
FAP	1.17889	1.38321	7.80425	5.12703e-14	7.28127e-13	21.1957	UP
HAPLN3	1.17798	2.25513	7.19073	3.12194e-12	3.24063e-11	17.1834	UP
CDK6	1.17655	3.0011	6.17562	1.60081e-09	1.06175e-08	11.1148	UP
MCM10	1.17595	1.5362	9.96405	4.56611e-21	2.46595e-19	37.1139	UP
SLC44A4	1.17559	5.63579	3.7218	0.000225695	0.000616703	-0.229955	UP
CKS1B	1.17437	3.60307	8.86909	2.36389e-17	5.97397e-16	28.7182	UP
HGH1	1.17347	3.95226	8.95803	1.20821e-17	3.2315e-16	29.3764	UP
KIAA1524	1.1723	1.85193	11.2174	1.27497e-25	2.09436e-23	47.4267	UP
HOXA11	1.17227	1.14912	6.56122	1.62941e-10	1.26254e-09	13.3327	UP
E2F3	1.17179	2.41864	12.7042	2.2847e-31	2.502e-28	60.4561	UP
ABHD17C	1.17152	4.55741	6.93604	1.59802e-11	1.47611e-10	15.592	UP
PROSER1	1.16908	3.6778	10.3514	1.92372e-22	1.49883e-20	40.2269	UP
TMPO	1.16899	3.89707	10.3795	1.52487e-22	1.23091e-20	40.4553	UP
MB21D1	1.16885	2.23417	10.0703	1.92952e-21	1.13876e-19	37.9604	UP
SNRPD1	1.16847	3.70529	9.19126	2.03665e-18	6.42343e-17	31.1231	UP
COLGALT1	1.16824	4.41676	12.3812	4.31412e-30	3.03714e-27	57.5619	UP
PLXNA1	1.16703	3.31285	9.76647	2.23489e-20	1.04147e-18	35.5536	UP
RACGAP1	1.16643	3.47638	8.96004	1.18991e-17	3.2027e-16	29.3914	UP
GYLTL1B	1.16638	2.76762	4.73493	3.03267e-06	1.15741e-05	3.84606	UP
CBX3	1.16575	4.9471	11.8304	5.98407e-28	2.10639e-25	52.7045	UP
KNTC1	1.16554	2.02435	10.9402	1.3737e-24	1.72474e-22	45.0875	UP
NOP58	1.16529	4.73967	10.623	2.00523e-23	1.89124e-21	42.4504	UP
DTX4	1.16438	3.46532	7.99874	1.32576e-14	2.07572e-13	22.5184	UP
NUDCD1	1.16379	2.60142	11.0808	4.12807e-25	5.93959e-23	46.2705	UP
LOX	1.1637	2.77423	6.48206	2.62738e-10	1.96625e-09	12.8685	UP
HEATR1	1.16326	2.8346	10.6068	2.29618e-23	2.14513e-21	42.3171	UP
APMAP	1.16284	5.15401	10.9681	1.08252e-24	1.4418e-22	45.3219	UP
BMP1	1.16243	2.80687	10.4707	7.15148e-23	6.07629e-21	41.1998	UP
ADAMTS14	1.16237	1.50468	8.27909	1.81168e-15	3.29142e-14	24.4663	UP
MSR1	1.16207	1.8384	7.13691	4.42463e-12	4.49811e-11	16.8433	UP
PGM2L1	1.16116	1.95832	10.8889	2.12567e-24	2.45036e-22	44.658	UP
CDC7	1.16047	1.88651	9.97036	4.33886e-21	2.35613e-19	37.1641	UP
OSMR	1.159	3.44514	6.59725	1.30903e-10	1.03256e-09	13.5455	UP
PLK4	1.15606	1.93176	10.1258	1.2275e-21	7.83054e-20	38.405	UP
CCT2	1.15368	4.86767	9.0699	5.16243e-18	1.50313e-16	30.2105	UP
FSCN1	1.15348	4.31535	5.51293	6.28673e-08	3.18407e-07	7.56591	UP
ITGA6	1.15334	5.27632	6.95363	1.42959e-11	1.33239e-10	15.7005	UP
HNF4G	1.15243	3.08177	5.34485	1.51236e-07	7.16798e-07	6.7205	UP
C6orf222	1.15243	2.55204	4.75009	2.82506e-06	1.08321e-05	3.91376	UP
LYN	1.1514	3.87397	8.26258	2.03967e-15	3.67893e-14	24.3502	UP
USH1C	1.14915	3.64045	5.37425	1.29917e-07	6.22944e-07	6.86673	UP
FAM84B	1.14888	3.87939	6.93651	1.59331e-11	1.47245e-10	15.5949	UP
ARL6IP1	1.14856	5.93072	8.6775	9.88579e-17	2.22453e-15	27.3154	UP
RMI2	1.14825	2.60965	8.44576	5.42699e-16	1.08167e-14	25.6468	UP
ANP32E	1.14801	4.18667	9.78344	1.95128e-20	9.20184e-19	35.6869	UP
PLEK2	1.14801	4.25515	5.41466	1.05313e-07	5.13334e-07	7.06887	UP
EFNA3	1.14681	2.25711	5.20853	3.03259e-07	1.37107e-06	6.05156	UP
ALPPL2	1.14599	1.16518	3.66043	0.000285032	0.000763287	-0.447814	UP
PVR	1.14593	4.28969	7.96955	1.62663e-14	2.51089e-13	22.3183	UP
KAT2A	1.14558	3.91705	10.818	3.8763e-24	4.22152e-22	44.0669	UP
ALG3	1.1443	4.66667	10.0399	2.46934e-21	1.41499e-19	37.718	UP
DCAF13	1.14355	2.5759	10.6525	1.56493e-23	1.49747e-21	42.6942	UP
GPR160	1.1432	3.55218	5.76395	1.62747e-08	9.09834e-08	8.87015	UP
STEAP1	1.14299	3.61563	5.94469	5.97142e-09	3.59766e-08	9.83966	UP
RCN3	1.14235	3.96499	6.14757	1.88238e-09	1.23726e-08	10.9577	UP
LPCAT1	1.14234	3.32279	7.87068	3.23887e-14	4.76452e-13	21.6447	UP
IL4I1	1.142	2.11306	6.41343	3.96126e-10	2.8824e-09	12.4697	UP
RAD54L	1.14197	1.76611	9.48919	2.00933e-19	7.84315e-18	33.3966	UP
FCGR2A	1.14136	2.96026	6.45973	3.0041e-10	2.22619e-09	12.7383	UP
SMC2	1.14069	2.90751	9.79857	1.72885e-20	8.37326e-19	35.8058	UP
ABCC3	1.14043	3.91298	5.42307	1.0079e-07	4.93486e-07	7.11114	UP
MMP14	1.13993	5.7323	7.09426	5.82486e-12	5.79605e-11	16.5753	UP
CD276	1.13972	3.95868	9.3275	7.10294e-19	2.4825e-17	32.157	UP
SGK223	1.13963	3.49416	7.7698	6.49926e-14	9.07962e-13	20.9638	UP
MZT1	1.13919	3.55645	9.2174	1.66524e-18	5.33743e-17	31.3207	UP
BID	1.13847	3.10407	10.9053	1.84908e-24	2.18258e-22	44.7951	UP
DTX3L	1.1384	4.35458	10.1211	1.27517e-21	8.08234e-20	38.3675	UP
QSOX2	1.13805	2.77115	10.272	3.70433e-22	2.67471e-20	39.5827	UP
PTPRU	1.13801	2.63563	5.27896	2.12074e-07	9.82697e-07	6.39531	UP
BAIAP2L1	1.13774	4.41156	6.36387	5.31749e-10	3.80604e-09	12.1839	UP
HELZ2	1.13716	3.56045	7.31213	1.41175e-12	1.57133e-11	17.9575	UP
CLN6	1.13705	3.83333	10.2835	3.36911e-22	2.45381e-20	39.6759	UP
FAT1	1.13692	4.21503	7.10182	5.54819e-12	5.53751e-11	16.6227	UP
TMC7	1.13565	1.84022	8.25316	2.18227e-15	3.89999e-14	24.284	UP
TOPBP1	1.13466	3.18772	10.6724	1.3244e-23	1.2924e-21	42.8583	UP
CKAP5	1.13454	4.0631	10.9259	1.55068e-24	1.89373e-22	44.9683	UP
C1QTNF6	1.13425	1.69021	9.46853	2.36288e-19	9.07935e-18	33.2375	UP
RHBDF2	1.13327	3.02562	8.65462	1.17121e-16	2.60869e-15	27.1493	UP
HSP90AB1	1.1324	8.65467	10.352	1.91464e-22	1.49767e-20	40.2315	UP
CASC5	1.13174	1.80496	9.35868	5.57371e-19	2.00491e-17	32.395	UP
DSN1	1.13134	3.08344	10.033	2.61287e-21	1.4929e-19	37.6625	UP
TAP1	1.13128	5.22028	5.77028	1.57201e-08	8.81831e-08	8.90365	UP
GJB1	1.1312	3.79596	4.2367	2.80929e-05	9.12452e-05	1.72991	UP
CD55	1.13115	5.57916	4.51132	8.44652e-06	2.98811e-05	2.87001	UP
PRAME	1.13104	1.09484	4.37851	1.52217e-05	5.17239e-05	2.31051	UP
ZNF217	1.12997	3.58921	8.64371	1.26963e-16	2.80887e-15	27.0702	UP
P4HA1	1.12768	3.8075	8.23623	2.46367e-15	4.34382e-14	24.1653	UP
SLAMF8	1.12766	2.43882	6.08744	2.65884e-09	1.69945e-08	10.6231	UP
CDH1	1.12758	5.75714	4.66164	4.26159e-06	1.58469e-05	3.5215	UP
SH3KBP1	1.12735	3.66054	8.8677	2.3886e-17	6.02099e-16	28.708	UP
HNF1A	1.12274	2.19002	7.64145	1.56202e-13	2.03911e-12	20.1069	UP
ANXA4	1.12064	4.72198	6.90803	1.90718e-11	1.74047e-10	15.4197	UP
CHEK1	1.11927	2.01153	10.5341	4.21738e-23	3.7113e-21	41.7192	UP
C2orf72	1.11861	2.77637	5.15682	3.93347e-07	1.74239e-06	5.80175	UP
BRI3BP	1.11839	3.49921	8.16069	4.22338e-15	7.17683e-14	23.6377	UP
SLCO4A1	1.11799	3.18128	5.34514	1.51007e-07	7.1608e-07	6.72196	UP
MSH2	1.11747	2.86579	10.4116	1.16844e-22	9.7183e-21	40.7171	UP
RFWD3	1.11604	2.9482	11.2387	1.06109e-25	1.80312e-23	47.6074	UP
TGIF1	1.11496	3.25812	11.4547	1.62633e-26	3.8695e-24	49.4534	UP
BATF2	1.11455	2.74961	5.34505	1.51082e-07	7.16239e-07	6.72149	UP
RFC4	1.11402	2.73501	10.446	8.78511e-23	7.40051e-21	40.9975	UP
BYSL	1.11086	3.11465	9.72884	3.01757e-20	1.37373e-18	35.2586	UP
APOBEC3B	1.11047	2.19444	5.76858	1.58669e-08	8.89305e-08	8.89467	UP
FANCA	1.10988	1.76151	9.67424	4.65962e-20	2.03659e-18	34.8318	UP
CBLC	1.10956	4.82703	5.50448	6.57387e-08	3.31672e-07	7.52286	UP
CENPM	1.10903	2.74419	7.19244	3.08752e-12	3.20829e-11	17.1942	UP
SLC12A8	1.1074	2.21031	10.5136	5.00663e-23	4.34761e-21	41.5505	UP
RCN1	1.10548	3.90739	8.00749	1.24687e-14	1.96e-13	22.5784	UP
GTPBP4	1.1023	3.17584	11.5265	8.68489e-27	2.28262e-24	50.0709	UP
HENMT1	1.10108	2.27536	7.47035	4.94574e-13	5.95908e-12	18.9812	UP
KDELR3	1.10027	4.86182	6.05359	3.22557e-09	2.02621e-08	10.4359	UP
IVNS1ABP	1.10021	4.162	9.3399	6.45053e-19	2.27465e-17	32.2515	UP
F11R	1.09986	4.20052	8.32594	1.29318e-15	2.42541e-14	24.7964	UP
FMNL2	1.09887	2.96979	9.17692	2.2742e-18	7.11571e-17	31.0149	UP
NOX1	1.09798	1.24537	4.19838	3.30578e-05	0.000105768	1.57599	UP
NOLC1	1.09766	4.96856	9.89583	7.9176e-21	4.10283e-19	36.5731	UP
DNA2	1.09739	1.58491	9.92066	6.48193e-21	3.40725e-19	36.7696	UP
ESF1	1.09714	3.3764	8.6863	9.26101e-17	2.09831e-15	27.3794	UP
FCER1G	1.09698	5.6897	5.05201	6.62071e-07	2.81813e-06	5.30216	UP
AOC1	1.09664	4.62117	3.35067	0.000881645	0.00215567	-1.4955	UP
ACTL6A	1.0958	3.88114	10.4742	6.94921e-23	5.95578e-21	41.2281	UP
C4BPA	1.09519	1.13066	4.77803	2.47773e-06	9.58796e-06	4.03905	UP
MYRF	1.09518	3.71082	5.28107	2.09806e-07	9.73551e-07	6.40564	UP
GJB3	1.09483	2.97924	4.33906	1.80808e-05	6.06783e-05	2.14726	UP
KNSTRN	1.09386	2.50164	9.68365	4.32385e-20	1.9025e-18	34.9053	UP
RRBP1	1.09385	6.18761	7.21691	2.63305e-12	2.78001e-11	17.3494	UP
NLRC5	1.0935	2.63012	7.3232	1.31256e-12	1.46839e-11	18.0286	UP
SULF2	1.09331	4.48313	5.77153	1.56122e-08	8.76524e-08	8.91031	UP
COL7A1	1.09271	1.76887	5.6462	3.08633e-08	1.65006e-07	8.25215	UP
PPAT	1.09182	2.10785	10.5321	4.28804e-23	3.7567e-21	41.7028	UP
ABCE1	1.09095	3.72561	10.6104	2.22816e-23	2.0915e-21	42.3467	UP
DKK1	1.09027	1.84264	3.01123	0.00276451	0.00613602	-2.5427	UP
LIMK1	1.08865	3.05556	10.309	2.72989e-22	2.06967e-20	39.8828	UP
BBC3	1.08863	2.54564	7.77933	6.08682e-14	8.54582e-13	21.0279	UP
TARBP1	1.08842	2.52123	10.1776	8.03522e-22	5.31511e-20	38.8215	UP
SLC6A6	1.08764	3.23172	8.8681	2.38141e-17	6.01056e-16	28.7109	UP
CDH11	1.08716	2.549	6.09446	2.55407e-09	1.63886e-08	10.662	UP
EFNA1	1.0868	4.62065	6.97393	1.25689e-11	1.18393e-10	15.8259	UP
CD24	1.0866	7.79178	3.74704	0.000204844	0.000564576	-0.139364	UP
CGN	1.08594	3.90187	5.44682	8.90234e-08	4.39037e-07	7.2307	UP
SEL1L3	1.08415	4.55213	6.73857	5.4975e-11	4.6271e-10	14.3893	UP
LYZ	1.08298	8.57782	2.65259	0.00830089	0.0166018	-3.53275	UP
ENTPD6	1.08204	4.22013	8.49911	3.67708e-16	7.50338e-15	26.0282	UP
OIP5	1.07993	2.11573	8.61965	1.5166e-16	3.30334e-15	26.896	UP
TMEM97	1.07975	4.39403	6.33697	6.2342e-10	4.42523e-09	12.0295	UP
FCHO1	1.07868	1.82574	7.80111	5.23937e-14	7.4301e-13	21.1745	UP
LIG1	1.07742	2.59005	9.42068	3.43672e-19	1.28548e-17	32.8697	UP
HEYL	1.07619	2.85936	5.61622	3.62638e-08	1.91438e-07	8.09654	UP
WDR43	1.07587	3.7679	12.0768	6.66988e-29	3.33433e-26	54.865	UP
BRIX1	1.07544	2.87116	9.90028	7.63941e-21	3.98381e-19	36.6082	UP
C10orf2	1.07485	2.33969	10.4094	1.19053e-22	9.86038e-21	40.6987	UP
ZNF761	1.07473	2.29595	9.02059	7.516e-18	2.10448e-16	29.842	UP
ITGA11	1.0741	2.01181	5.96321	5.38105e-09	3.27178e-08	9.94041	UP
TMEM132A	1.07356	2.52778	6.94653	1.4954e-11	1.38848e-10	15.6566	UP
GPR35	1.07339	3.04879	6.46669	2.88133e-10	2.14189e-09	12.7789	UP
FOXC1	1.07331	2.73206	5.29233	1.98066e-07	9.23216e-07	6.46101	UP
NOL6	1.0721	3.61223	9.61422	7.49934e-20	3.18593e-18	34.3644	UP
GSG2	1.0717	1.68469	9.28221	1.00921e-18	3.3718e-17	31.8122	UP
CCDC34	1.07061	2.55532	7.90087	2.62626e-14	3.93081e-13	21.8498	UP
GPATCH4	1.07022	3.43266	10.9411	1.3633e-24	1.72265e-22	45.095	UP
CPNE1	1.07007	5.06915	7.84829	3.78241e-14	5.49844e-13	21.493	UP
KRT19	1.07	8.03427	3.66645	0.000278622	0.00074744	-0.4266	UP
XRCC2	1.06998	1.39394	10.2303	5.21766e-22	3.6343e-20	39.2459	UP
PNPT1	1.06839	2.92409	11.1673	1.96391e-25	3.09701e-23	47.0015	UP
MCM8	1.06832	2.15358	9.53637	1.38655e-19	5.56651e-18	33.7609	UP
ICAM1	1.06795	4.11893	5.49563	6.88827e-08	3.46205e-07	7.47784	UP
LRP8	1.06744	1.37741	8.11597	5.8013e-15	9.66655e-14	23.327	UP
NELFCD	1.06719	3.94279	9.10004	4.10084e-18	1.21193e-16	30.4364	UP
MFHAS1	1.06716	3.45015	8.91977	1.61343e-17	4.21245e-16	29.0927	UP
KLK10	1.06709	2.59159	2.72398	0.00672857	0.0137217	-3.3453	UP
PDIA4	1.06579	6.23436	7.29983	1.53066e-12	1.69507e-11	17.8786	UP
ABRACL	1.06541	4.60883	6.84255	2.87798e-11	2.5497e-10	15.0191	UP
PPAP2C	1.06528	3.48425	6.04071	3.47088e-09	2.17131e-08	10.3649	UP
NCAPD3	1.06383	2.51661	9.5515	1.23075e-19	4.99186e-18	33.8779	UP
CASK	1.06319	3.3381	9.28611	9.7919e-19	3.28262e-17	31.8418	UP
JUP	1.06275	7.2093	4.5231	8.01099e-06	2.84681e-05	2.92036	UP
UAP1L1	1.06192	2.22562	7.78292	5.93873e-14	8.3498e-13	21.052	UP
UNC93B1	1.06184	4.56545	6.94955	1.46706e-11	1.3628e-10	15.6753	UP
ORC6	1.06122	1.54323	9.64715	5.77734e-20	2.48653e-18	34.6207	UP
WARS	1.05974	5.03492	5.00799	8.21768e-07	3.44433e-06	5.09502	UP
FANCD2	1.05968	1.69614	10.2503	4.42721e-22	3.15051e-20	39.4074	UP
KIAA1244	1.05917	2.56158	6.94999	1.46295e-11	1.36027e-10	15.678	UP
PARPBP	1.05902	1.77471	9.94569	5.29636e-21	2.83701e-19	36.9681	UP
TMPRSS4	1.0589	3.59268	4.94377	1.12321e-06	4.58969e-06	4.79569	UP
CENPN	1.05844	2.45999	9.60878	7.82931e-20	3.30474e-18	34.3222	UP
PDCD11	1.05834	3.0777	11.0824	4.07392e-25	5.90479e-23	46.2835	UP
CBX2	1.0583	1.38282	6.12515	2.14176e-09	1.39565e-08	10.8326	UP
DHX34	1.05813	2.86742	10.2451	4.61785e-22	3.27196e-20	39.366	UP
MGME1	1.05793	3.42563	9.42509	3.32028e-19	1.24903e-17	32.9035	UP
PDZK1IP1	1.05747	5.38799	2.96082	0.00324828	0.0070971	-2.68913	UP
2022-09-11	1.05697	3.74312	10.1709	8.49154e-22	5.59817e-20	38.7672	UP
SLC20A1	1.05689	3.28042	9.73116	2.96239e-20	1.35486e-18	35.2767	UP
SEMA4G	1.05595	3.5201	5.41164	1.06982e-07	5.21084e-07	7.05373	UP
CHTF18	1.05579	1.95619	9.12797	3.31138e-18	9.98071e-17	30.6462	UP
SHCBP1	1.0555	1.73835	10.1299	1.18707e-21	7.5995e-20	38.4379	UP
MASTL	1.05525	2.51547	10.5874	2.70252e-23	2.47521e-21	42.1569	UP
RNF213	1.0545	3.76671	7.25942	1.995e-12	2.15482e-11	17.6201	UP
MMP10	1.0545	1.21799	5.0273	7.47585e-07	3.15555e-06	5.1857	UP
POF1B	1.05413	4.29011	4.57333	6.38382e-06	2.30768e-05	3.13644	UP
SCML1	1.05299	2.35694	7.26581	1.91326e-12	2.08021e-11	17.6609	UP
SERINC5	1.05271	3.3911	8.64234	1.28256e-16	2.83111e-15	27.0602	UP
PTBP3	1.05267	4.67143	9.2838	9.96914e-19	3.33636e-17	31.8242	UP
C1orf106	1.05241	4.10772	5.23844	2.60647e-07	1.1918e-06	6.19706	UP
PODXL2	1.05147	3.92779	4.05119	6.1063e-05	0.000185838	0.996811	UP
CXCL6	1.0504	1.37733	4.49817	8.95942e-06	3.15653e-05	2.81395	UP
FUT4	1.04956	3.06397	6.54887	1.75595e-10	1.35208e-09	13.26	UP
CCT5	1.04914	4.92432	9.45986	2.52912e-19	9.62433e-18	33.1707	UP
TP53I11	1.0488	4.50433	6.62181	1.12696e-10	8.97201e-10	13.6911	UP
POLD1	1.04758	2.78534	7.99829	1.32995e-14	2.08063e-13	22.5153	UP
MAGEA12	1.04747	0.972196	3.53274	0.000458524	0.00118057	-0.890244	UP
FXYD5	1.04741	5.5662	6.1206	2.19844e-09	1.42975e-08	10.8073	UP
LYAR	1.04724	3.46218	8.56234	2.31306e-16	4.93725e-15	26.4823	UP
XPO1	1.04699	4.02368	11.6333	3.40475e-27	9.72672e-25	50.9927	UP
MCM6	1.04662	3.70398	9.3619	5.4358e-19	1.96246e-17	32.4196	UP
CDCP1	1.04646	3.94128	5.81789	1.2097e-08	6.93791e-08	9.15685	UP
XPOT	1.0456	3.73678	9.65385	5.47821e-20	2.36294e-18	34.6729	UP
BMP8A	1.04437	1.52034	7.79054	5.63516e-14	7.94953e-13	21.1033	UP
COL18A1	1.04375	4.39597	5.98346	4.80059e-09	2.94062e-08	10.0509	UP
GBP5	1.04351	1.83635	4.66321	4.23082e-06	1.57444e-05	3.5284	UP
BZW2	1.04113	4.62854	8.79931	3.98991e-17	9.6978e-16	28.2049	UP
E2F8	1.04108	2.30873	7.31624	1.3741e-12	1.53116e-11	17.9839	UP
CYP2B6	1.04056	1.58543	3.66271	0.000282589	0.000757361	-0.439786	UP
BRCA1	1.03859	1.94584	9.48735	2.03863e-19	7.9418e-18	33.3824	UP
BLM	1.0383	1.55048	9.48658	2.05101e-19	7.97426e-18	33.3765	UP
MICB	1.03787	2.04861	6.83616	2.99533e-11	2.64534e-10	14.9802	UP
SALL4	1.03769	1.02454	5.50242	6.6457e-08	3.35183e-07	7.51239	UP
CASP2	1.03748	2.8775	11.4107	2.38713e-26	5.2428e-24	49.0756	UP
SRPK1	1.03712	3.90834	10.1868	7.45412e-22	4.98087e-20	38.8953	UP
RNASEH2A	1.03635	3.42024	7.88265	2.98066e-14	4.42431e-13	21.726	UP
PHF14	1.03531	3.10074	9.44059	2.94109e-19	1.1085e-17	33.0226	UP
TRPM2	1.03409	1.70093	8.55996	2.35386e-16	4.99993e-15	26.4652	UP
MAPK15	1.03374	1.21296	6.92729	1.68885e-11	1.55419e-10	15.5381	UP
NAT10	1.0306	3.68696	10.9111	1.75937e-24	2.0892e-22	44.8441	UP
PIGW	1.03023	2.11053	11.3992	2.63696e-26	5.71206e-24	48.9777	UP
MRGBP	1.03014	3.09932	8.81943	3.43191e-17	8.47742e-16	28.3526	UP
PRR15	1.02982	4.33176	4.62041	5.15069e-06	1.88753e-05	3.34088	UP
SLC2A1	1.02948	4.4493	4.54338	7.31104e-06	2.61552e-05	3.00735	UP
TICRR	1.02919	1.51996	8.59831	1.77521e-16	3.84961e-15	26.7417	UP
CCL3	1.02744	1.64866	5.6673	2.75399e-08	1.48649e-07	8.36212	UP
NUP107	1.02736	2.4187	9.7029	3.70997e-20	1.65455e-18	35.0557	UP
OTX1	1.02602	1.27452	9.55066	1.23897e-19	5.0149e-18	33.8714	UP
RASSF7	1.02545	4.14401	6.1989	1.39882e-09	9.39796e-09	11.2455	UP
CDX1	1.02516	2.98125	2.23302	0.0260919	0.0463731	-4.53685	UP
LFNG	1.02455	3.97734	5.61905	3.57163e-08	1.89004e-07	8.11122	UP
TRMT6	1.0242	2.70259	9.72056	3.22347e-20	1.44741e-18	35.1938	UP
TNFRSF10A	1.02348	2.7689	8.3007	1.55104e-15	2.85473e-14	24.6183	UP
UGT8	1.02346	2.93985	4.87648	1.55279e-06	6.19608e-06	4.48574	UP
ERBB3	1.02301	5.06282	6.21819	1.2505e-09	8.46205e-09	11.3542	UP
H2AFX	1.02278	5.51826	6.3392	6.15284e-10	4.37062e-09	12.0422	UP
RBL1	1.02241	2.10507	9.9305	5.98733e-21	3.18119e-19	36.8476	UP
SLC52A3	1.02191	2.94189	6.13732	1.99689e-09	1.3086e-08	10.9005	UP
DDIAS	1.02146	1.43492	9.20131	1.88508e-18	5.98369e-17	31.199	UP
MND1	1.02105	1.7754	8.43664	5.79981e-16	1.15016e-14	25.5817	UP
GINS2	1.01921	2.29768	6.80795	3.57243e-11	3.10942e-10	14.8087	UP
URB2	1.0187	2.11135	10.7641	6.1174e-24	6.41416e-22	43.6181	UP
WDR62	1.01815	1.39924	9.44112	2.92881e-19	1.10599e-17	33.0267	UP
IRF8	1.01726	3.1615	5.48948	7.11517e-08	3.5679e-07	7.4466	UP
KIF22	1.01724	3.49092	8.88126	2.15695e-17	5.50749e-16	28.808	UP
FAM122B	1.01582	3.32532	8.54031	2.71915e-16	5.72038e-15	26.3238	UP
TGIF2	1.01428	3.02735	8.86528	2.43244e-17	6.11585e-16	28.6901	UP
HOOK1	1.01393	2.67725	6.85288	2.69751e-11	2.39736e-10	15.0822	UP
LIPG	1.0137	1.54683	6.77039	4.51322e-11	3.83965e-10	14.5812	UP
FOXD2	1.01313	1.37929	7.84415	3.89228e-14	5.64567e-13	21.465	UP
EFNA4	1.01284	3.39653	7.46009	5.29656e-13	6.35458e-12	18.9143	UP
VMP1	1.01278	4.72212	8.79143	4.23213e-17	1.01985e-15	28.1471	UP
FAM213B	1.01208	4.52144	7.03152	8.7087e-12	8.42535e-11	16.1833	UP
MARVELD3	1.01184	2.10265	7.30942	1.43716e-12	1.59601e-11	17.9401	UP
POLR1B	1.01153	2.66461	11.6401	3.20695e-27	9.29637e-25	51.0517	UP
ZNF195	1.0114	2.3887	10.0474	2.32354e-21	1.33923e-19	37.7778	UP
DNAJC2	1.01124	2.61899	10.2544	4.27816e-22	3.06658e-20	39.4411	UP
MLXIPL	1.01098	1.8521	3.98669	7.94453e-05	0.000236195	0.749033	UP
NUP155	1.01086	2.7991	8.98711	9.69203e-18	2.66829e-16	29.5926	UP
TCF3	1.01019	4.07985	8.64929	1.21834e-16	2.70449e-15	27.1106	UP
MAP7	1.0098	3.48791	6.89976	2.00923e-11	1.826e-10	15.369	UP
FBXL6	1.00854	3.33773	7.31155	1.41711e-12	1.57642e-11	17.9538	UP
CENPO	1.00823	1.83197	11.4332	1.96196e-26	4.49698e-24	49.2687	UP
CMTM8	1.00784	3.78072	6.806	3.61633e-11	3.13755e-10	14.7968	UP
CTSS	1.00729	5.26716	5.49147	7.04117e-08	3.53169e-07	7.45668	UP
SPINK1	1.00718	6.36786	2.25155	0.0248849	0.0444724	-4.49606	UP
CELSR3	1.00612	1.25143	7.28326	1.70656e-12	1.87303e-11	17.7725	UP
DDAH1	1.0061	4.54512	7.2671	1.89716e-12	2.06612e-11	17.6692	UP
DNMT3B	1.00555	1.37213	6.58349	1.42331e-10	1.11645e-09	13.4642	UP
ALG8	1.00468	3.51665	9.19149	2.03315e-18	6.42267e-17	31.1248	UP
CDC25A	1.0034	1.71578	8.01065	1.21945e-14	1.92457e-13	22.6001	UP
IGF2BP3	1.00326	1.0875	5.92945	6.50465e-09	3.89962e-08	9.7569	UP
BCL2A1	1.00281	2.6058	4.90694	1.34162e-06	5.42482e-06	4.6256	UP
ATIC	1.00252	4.41257	10.5583	3.44503e-23	3.08304e-21	41.9181	UP
TAF1D	1.00232	3.0025	9.11955	3.53208e-18	1.05332e-16	30.5829	UP
HSD3B7	1.00134	3.32052	6.53166	1.94861e-10	1.4888e-09	13.1589	UP
TMC6	1.00099	3.01192	7.83913	4.02971e-14	5.82786e-13	21.4311	UP
CCDC86	1.00087	3.94368	8.80428	3.84435e-17	9.37869e-16	28.2413	UP
POLR1C	0.999417	3.45545	9.33247	6.83402e-19	2.39701e-17	32.1949	UP
TM4SF1	0.998927	5.84158	4.23017	2.8885e-05	9.36173e-05	1.7036	UP
LRRC16A	0.9975	3.1546	8.31274	1.42223e-15	2.63983e-14	24.7032	UP
RPL22L1	0.997325	4.13814	4.55224	7.02397e-06	2.52336e-05	3.04547	UP
IL11	0.99699	1.123	4.78506	2.39697e-06	9.30098e-06	4.0707	UP
STC1	0.996592	3.13339	5.58293	4.33378e-08	2.25581e-07	7.92461	UP
IL2RG	0.996439	4.91699	3.7877	0.000175035	0.000489159	0.0077368	UP
NFKBIE	0.996299	3.2152	7.60545	1.99371e-13	2.56695e-12	19.8685	UP
E2F7	0.995539	1.3069	8.80462	3.83463e-17	9.36656e-16	28.2438	UP
DDX39A	0.995493	4.1142	8.31661	1.38315e-15	2.57457e-14	24.7305	UP
FAR2	0.994307	2.28478	6.50931	2.23e-10	1.69133e-09	13.0278	UP
ANGPT2	0.994026	1.57062	7.96172	1.71813e-14	2.62949e-13	22.2648	UP
SGOL2	0.993972	1.58344	9.62999	6.61921e-20	2.84266e-18	34.4871	UP
ANO9	0.993753	2.73591	5.79961	1.33799e-08	7.62489e-08	9.05942	UP
CDC25C	0.993575	1.64945	8.6329	1.37529e-16	3.0189e-15	26.9918	UP
LSG1	0.993271	3.40836	11.2292	1.15161e-25	1.94022e-23	47.5268	UP
FIGNL1	0.992343	2.07099	9.95216	5.02653e-21	2.69981e-19	37.0195	UP
SPDL1	0.991466	2.03196	10.7115	9.52762e-24	9.53669e-22	43.1823	UP
FAM64A	0.991438	1.67573	7.94379	1.94751e-14	2.95529e-13	22.1422	UP
NCR3LG1	0.990595	1.65179	6.55617	1.68001e-10	1.29878e-09	13.303	UP
CHAF1A	0.990536	2.71265	9.06898	5.19878e-18	1.50703e-16	30.2036	UP
DDX11	0.990306	2.02936	9.05343	5.85327e-18	1.68437e-16	30.0873	UP
CENPK	0.989902	1.61191	9.77457	2.09475e-20	9.80799e-19	35.6172	UP
TOR4A	0.989674	4.17941	4.48371	9.55794e-06	3.35063e-05	2.75246	UP
TTI1	0.989053	3.21465	9.97546	4.16348e-21	2.27973e-19	37.2046	UP
IL18BP	0.989021	2.54143	6.42565	3.68292e-10	2.6938e-09	12.5405	UP
RPN2	0.988231	7.1702	8.47269	4.45966e-16	8.98863e-15	25.8391	UP
PRRC2C	0.987983	4.62138	11.5704	5.91348e-27	1.61898e-24	50.4493	UP
HOXC8	0.987594	1.01087	6.83997	2.92475e-11	2.58764e-10	15.0034	UP
MYH14	0.986992	5.35333	5.07433	5.93027e-07	2.55068e-06	5.40777	UP
PDZD8	0.986696	3.45035	7.47818	4.69344e-13	5.662e-12	19.0324	UP
TMEM176A	0.986089	4.99754	4.15727	3.93094e-05	0.000124019	1.41232	UP
GNL3	0.985803	4.34195	8.80658	3.77874e-17	9.2415e-16	28.2582	UP
TNS3	0.985738	3.72254	8.11957	5.65543e-15	9.45545e-14	23.3519	UP
LCN2	0.985107	7.81844	1.99991	0.0461757	0.076792	-5.022	UP
PARD6B	0.98504	2.63681	6.63195	1.05923e-10	8.44639e-10	13.7514	UP
FAM49B	0.984299	3.08657	10.2111	6.10678e-22	4.17975e-20	39.0912	UP
KCNN4	0.984128	3.09306	4.107	4.84892e-05	0.000150286	1.2142	UP
POLE2	0.983572	1.81873	9.79371	1.79746e-20	8.62083e-19	35.7675	UP
LAPTM4B	0.982894	5.72966	5.24439	2.52896e-07	1.15852e-06	6.22607	UP
TNFSF9	0.982281	1.84145	4.13444	4.32527e-05	0.000135226	1.32206	UP
POLD3	0.982247	2.84914	7.72376	8.91235e-14	1.21494e-12	20.6552	UP
EHF	0.980795	4.27989	4.24171	2.74994e-05	8.9465e-05	1.75011	UP
RRP12	0.98075	2.46965	10.4729	7.02406e-23	5.99387e-21	41.2175	UP
VMA21	0.980223	3.4165	10.0593	2.10945e-21	1.23754e-19	37.8728	UP
NPSR1	0.979868	1.00035	4.03617	6.49426e-05	0.000196553	0.93878	UP
RAD21	0.978946	5.19125	9.08827	4.48689e-18	1.31812e-16	30.3481	UP
GRHL2	0.97894	2.75407	6.88211	2.2454e-11	2.02107e-10	15.2608	UP
TOMM40	0.978758	4.45397	7.1902	3.13277e-12	3.25017e-11	17.18	UP
IFITM3	0.977844	8.58139	5.71994	2.06979e-08	1.14125e-07	8.6379	UP
MATN3	0.977243	1.25252	5.59736	4.01199e-08	2.09717e-07	7.99904	UP
RNF128	0.97669	3.91106	4.25513	2.59668e-05	8.47304e-05	1.80438	UP
PTPN12	0.976417	4.08161	9.3269	7.13645e-19	2.4898e-17	32.1523	UP
HAVCR2	0.97604	1.9345	6.49475	2.43441e-10	1.83367e-09	12.9426	UP
RAI14	0.975665	3.11427	7.96748	1.65028e-14	2.53945e-13	22.3042	UP
LAMB1	0.975266	4.30322	7.12071	4.91216e-12	4.9478e-11	16.7414	UP
MUC1	0.974587	6.13654	2.95966	0.00326018	0.00711994	-2.69245	UP
MYEOV	0.974004	2.95852	3.96174	8.78781e-05	0.000259242	0.654151	UP
IRAK1	0.973919	5.22008	7.82834	4.342e-14	6.2383e-13	21.3581	UP
CCND1	0.973749	5.44819	5.42231	1.01195e-07	4.95218e-07	7.10728	UP
TRAF2	0.973084	2.90363	10.6563	1.51611e-23	1.45783e-21	42.7254	UP
POC1A	0.97242	2.44559	7.61309	1.89324e-13	2.44238e-12	19.919	UP
BORA	0.97228	1.88645	8.96415	1.15352e-17	3.12338e-16	29.4218	UP
TCOF1	0.972247	3.07851	9.87601	9.2871e-21	4.73042e-19	36.4163	UP
DDX27	0.972102	3.82717	8.45556	5.0533e-16	1.0123e-14	25.7167	UP
CEP72	0.971684	1.74856	7.66106	1.36701e-13	1.80971e-12	20.2372	UP
CTSC	0.971171	3.88378	6.77129	4.48811e-11	3.82489e-10	14.5867	UP
CTPS1	0.971101	2.63893	10.1298	1.18742e-21	7.5995e-20	38.4376	UP
SPRY4	0.970953	3.10972	7.65515	1.42308e-13	1.87637e-12	20.1979	UP
CARD11	0.97064	2.42922	4.24403	2.72286e-05	8.8613e-05	1.75947	UP
PIGU	0.970217	4.00801	8.77906	4.64225e-17	1.11144e-15	28.0564	UP
ZMIZ2	0.970102	4.33789	9.89067	8.25351e-21	4.25898e-19	36.5322	UP
SRMS	0.970076	1.69224	5.16439	3.78699e-07	1.68394e-06	5.83819	UP
RAB3IP	0.969367	1.90928	8.30393	1.51538e-15	2.79693e-14	24.6411	UP
WDHD1	0.969228	1.66593	10.018	2.94889e-21	1.67036e-19	37.5436	UP
WBSCR27	0.968856	1.82106	5.09818	5.26937e-07	2.28788e-06	5.52112	UP
MFSD12	0.968384	3.72621	8.94021	1.38261e-17	3.67304e-16	29.2442	UP
PDX1	0.968044	2.62219	4.42729	1.22814e-05	4.23754e-05	2.51425	UP
ADAMDEC1	0.967992	2.25406	4.25736	2.57201e-05	8.40092e-05	1.81341	UP
UTP18	0.967577	3.42955	11.8836	3.73294e-28	1.38837e-25	53.1692	UP
SLC39A14	0.967431	4.92542	5.97899	4.92335e-09	3.01395e-08	10.0264	UP
PYCRL	0.967211	2.63442	7.51992	3.5485e-13	4.35813e-12	19.3054	UP
ASS1	0.967132	5.50633	3.76044	0.000194529	0.000538561	-0.0910546	UP
FPR3	0.966389	2.94947	4.68492	3.8269e-06	1.43633e-05	3.6241	UP
VARS	0.966368	4.32992	8.67843	9.81826e-17	2.21186e-15	27.3221	UP
DNAJC22	0.965725	2.57616	6.45566	3.07808e-10	2.28016e-09	12.7147	UP
FASN	0.965708	5.16447	5.97013	5.17537e-09	3.15744e-08	9.97813	UP
CPNE7	0.965509	1.47525	5.22335	2.81365e-07	1.27735e-06	6.12356	UP
CMTM7	0.965491	2.92744	6.08729	2.66108e-09	1.70033e-08	10.6222	UP
PON2	0.964311	4.29973	5.58058	4.38859e-08	2.28253e-07	7.91249	UP
ZIC2	0.962887	1.0683	4.53495	7.59446e-06	2.70954e-05	2.97116	UP
SNRPB	0.96286	7.37303	7.48179	4.58142e-13	5.53703e-12	19.0559	UP
TMTC4	0.962318	2.42881	8.93864	1.39911e-17	3.70689e-16	29.2325	UP
NSUN2	0.962201	3.71461	9.78617	1.90913e-20	9.04449e-19	35.7083	UP
GAL3ST2	0.962096	1.06321	4.74541	2.88756e-06	1.10588e-05	3.89287	UP
MLK4	0.961695	2.10727	7.7368	8.15095e-14	1.115e-12	20.7425	UP
ZNF468	0.961387	2.39637	7.6009	2.05609e-13	2.63521e-12	19.8384	UP
NKD2	0.960036	1.48541	4.28411	2.29317e-05	7.54766e-05	1.92206	UP
ZNF121	0.959452	2.66929	9.49503	1.91928e-19	7.56656e-18	33.4416	UP
FZD2	0.958499	2.23131	5.65909	2.87892e-08	1.54714e-07	8.3193	UP
BST2	0.958084	6.24519	3.91897	0.000104338	0.00030335	0.492812	UP
INCENP	0.957845	3.17452	7.81811	4.65964e-14	6.66068e-13	21.2891	UP
CTSB	0.957826	7.02997	6.46564	2.89952e-10	2.15356e-09	12.7727	UP
GALNT3	0.95751	4.1709	5.04336	6.90882e-07	2.93442e-06	5.26131	UP
DIO2	0.957162	2.46033	5.09835	5.26477e-07	2.28712e-06	5.52196	UP
POLQ	0.956194	1.26671	9.06041	5.55002e-18	1.60414e-16	30.1395	UP
TRABD2A	0.956045	1.56448	5.10677	5.04934e-07	2.20059e-06	5.56205	UP
DTYMK	0.955988	3.58097	7.98623	1.4473e-14	2.24993e-13	22.4326	UP
DPP3	0.955464	4.06408	8.44964	5.27585e-16	1.05436e-14	25.6745	UP
STRIP2	0.955222	1.17605	7.75458	7.21547e-14	9.96018e-13	20.8616	UP
TTLL4	0.955187	2.56785	9.08219	4.70009e-18	1.37053e-16	30.3026	UP
ANKRD13B	0.955137	2.04687	7.07774	6.47716e-12	6.40631e-11	16.4718	UP
CPLX1	0.955057	2.02962	5.28598	2.04604e-07	9.50991e-07	6.42978	UP
SHMT2	0.954601	4.3421	6.82958	3.12116e-11	2.74864e-10	14.9402	UP
TMEM194A	0.954244	2.61358	8.28837	1.69488e-15	3.09517e-14	24.5315	UP
STRA6	0.954134	0.985884	5.17511	3.58851e-07	1.604e-06	5.88989	UP
ADPGK	0.952955	3.10947	11.9241	2.60354e-28	1.06919e-25	53.524	UP
PLS1	0.952833	4.64456	4.50164	8.82103e-06	3.11223e-05	2.82875	UP
TC2N	0.952258	3.84083	5.29307	1.97323e-07	9.19969e-07	6.46463	UP
TMEM201	0.950724	2.44329	8.93357	1.45369e-17	3.84118e-16	29.195	UP
DCBLD1	0.950507	2.15257	10.2833	3.37349e-22	2.45381e-20	39.6746	UP
WDR34	0.950302	4.6106	7.14724	4.1387e-12	4.22924e-11	16.9085	UP
TOP1MT	0.949667	2.40391	8.60159	1.73282e-16	3.76183e-15	26.7654	UP
LUM	0.94963	6.76234	3.9615	8.79638e-05	0.000259417	0.653234	UP
MIS18A	0.949404	2.97487	7.44023	6.04626e-13	7.18408e-12	18.7851	UP
THOC2	0.9493	3.32183	9.57464	1.02544e-19	4.22876e-18	34.0572	UP
CBX4	0.948111	4.0902	7.33459	1.2177e-12	1.37162e-11	18.1018	UP
TNNC1	0.947812	1.37126	4.61944	5.17356e-06	1.89521e-05	3.33666	UP
EFNA2	0.947767	2.47311	3.41603	0.0006995	0.0017434	-1.2817	UP
ATAD5	0.947724	1.50442	10.759	6.38415e-24	6.65843e-22	43.5761	UP
CALU	0.947673	5.29608	8.38967	8.15741e-16	1.57956e-14	25.2476	UP
P3H1	0.94688	2.53972	9.77913	2.01973e-20	9.50189e-19	35.653	UP
C17orf53	0.946482	1.62779	9.06931	5.18587e-18	1.50551e-16	30.2061	UP
RCOR2	0.946018	1.58219	5.75665	1.69386e-08	9.43204e-08	8.83152	UP
XRN2	0.945931	5.0063	9.85866	1.06772e-20	5.35544e-19	36.2793	UP
CLDN12	0.945545	3.36131	6.60607	1.24054e-10	9.82069e-10	13.5978	UP
ZSWIM4	0.945434	2.79283	8.1794	3.69668e-15	6.33644e-14	23.7681	UP
IFI44	0.945227	3.45796	4.58114	6.16122e-06	2.23008e-05	3.17024	UP
NEK6	0.944992	4.10032	7.46838	5.01104e-13	6.03406e-12	18.9684	UP
CHML	0.943754	1.89244	7.94943	1.87227e-14	2.8477e-13	22.1807	UP
TPM3	0.942598	5.51072	9.35127	5.90481e-19	2.10862e-17	32.3383	UP
SPATA13	0.942366	2.58901	8.26146	2.05609e-15	3.70472e-14	24.3424	UP
ANKRD10	0.942182	4.05215	8.11648	5.78066e-15	9.64031e-14	23.3305	UP
FOXRED2	0.94137	3.21898	5.67369	2.66055e-08	1.44317e-07	8.39545	UP
RRP9	0.941334	3.64699	8.3714	9.31161e-16	1.78204e-14	25.118	UP
UCK2	0.941251	3.02616	10.1444	1.05432e-21	6.85897e-20	38.5545	UP
FAM111A	0.940083	2.67675	9.26637	1.14092e-18	3.76083e-17	31.6918	UP
TBL1XR1	0.939354	3.90149	8.93726	1.41375e-17	3.74065e-16	29.2223	UP
GARS	0.93932	5.10905	9.80429	1.65137e-20	8.03748e-19	35.8508	UP
BATF	0.939108	3.00862	5.06897	6.08924e-07	2.60824e-06	5.3824	UP
LEF1	0.938945	1.9421	6.59589	1.31988e-10	1.04028e-09	13.5375	UP
NMI	0.938647	3.47699	8.13086	5.22033e-15	8.77265e-14	23.4303	UP
ZNF239	0.938603	1.74964	8.24142	2.37368e-15	4.21512e-14	24.2017	UP
NT5C3A	0.93847	3.66944	7.86228	3.43301e-14	5.03134e-13	21.5878	UP
INTS8	0.938331	2.76035	9.56957	1.06733e-19	4.3923e-18	34.0178	UP
FKBP9	0.938252	4.37287	9.5199	1.57847e-19	6.29854e-18	33.6336	UP
SNRPF	0.938081	4.18857	7.05253	7.61351e-12	7.40758e-11	16.3143	UP
LAPTM5	0.938035	5.55068	4.24462	2.71593e-05	8.84022e-05	1.76188	UP
CKLF	0.937998	3.12174	7.13012	4.62277e-12	4.67303e-11	16.8006	UP
METTL1	0.937813	2.59001	9.22778	1.53719e-18	4.95116e-17	31.3992	UP
PAK1IP1	0.937759	3.46529	9.0269	7.16362e-18	2.01728e-16	29.8891	UP
DONSON	0.937325	2.33609	10.0525	2.23013e-21	1.29677e-19	37.8181	UP
PMAIP1	0.93721	2.32843	5.66886	2.73088e-08	1.47616e-07	8.37026	UP
C16orf59	0.936473	1.40949	8.92712	1.52633e-17	4.01696e-16	29.1472	UP
GBP4	0.936131	3.55292	3.75093	0.000201798	0.000556888	-0.125361	UP
UHMK1	0.935746	3.80633	8.90522	1.80071e-17	4.64695e-16	28.985	UP
ITGB4	0.934544	5.96192	4.18774	3.45784e-05	0.000110239	1.53348	UP
GNPNAT1	0.934246	3.60921	7.7	1.04839e-13	1.41547e-12	20.4965	UP
CELSR1	0.933804	2.14712	5.39783	1.14952e-07	5.55784e-07	6.98454	UP
GABRD	0.933581	1.04785	8.26257	2.03991e-15	3.67893e-14	24.3501	UP
ADAR	0.933387	5.52702	9.85341	1.11367e-20	5.55762e-19	36.2379	UP
PUS1	0.933345	2.23821	10.5668	3.20879e-23	2.90145e-21	41.988	UP
BRCA2	0.93319	1.33519	9.31156	8.03856e-19	2.73672e-17	32.0355	UP
PDCD2L	0.933133	2.65191	8.38778	8.26997e-16	1.59665e-14	25.2342	UP
PLXND1	0.933035	3.6864	6.13929	1.97434e-09	1.29512e-08	10.9115	UP
HPRT1	0.932825	4.4774	8.1104	6.03505e-15	1.00391e-13	23.2884	UP
PLBD1	0.932534	5.02556	4.54646	7.21019e-06	2.58178e-05	3.02057	UP
PGAM5	0.932244	3.75306	8.19952	3.20265e-15	5.53292e-14	23.9085	UP
RUVBL1	0.931715	2.65571	10.1845	7.59363e-22	5.03992e-20	38.877	UP
LGALS2	0.931559	3.63809	2.74439	0.00633135	0.0129855	-3.29082	UP
RRS1	0.931227	4.11894	7.4505	5.64632e-13	6.7373e-12	18.8519	UP
AHCY	0.930803	5.65933	7.33343	1.22701e-12	1.38052e-11	18.0943	UP
KIAA0020	0.930398	3.40029	7.83468	4.15577e-14	5.99696e-13	21.401	UP
SPON2	0.929981	3.45102	5.4506	8.72813e-08	4.30876e-07	7.24974	UP
WDR75	0.929823	3.21847	11.2418	1.03244e-25	1.76969e-23	47.6343	UP
VEGFA	0.929745	3.45274	5.73294	1.92819e-08	1.06825e-07	8.70635	UP
GMNN	0.92965	3.00522	6.97479	1.25006e-11	1.17844e-10	15.8312	UP
MAP4K4	0.929514	3.5814	8.98386	9.93388e-18	2.71967e-16	29.5684	UP
WHSC1	0.928252	2.4669	9.3176	7.6707e-19	2.64344e-17	32.0815	UP
YTHDF1	0.927752	4.65184	9.99434	3.57339e-21	2.0011e-19	37.3548	UP
LILRB4	0.927748	1.66898	5.7026	2.27453e-08	1.24484e-07	8.54681	UP
IFI44L	0.926525	1.94239	4.42769	1.22598e-05	4.23232e-05	2.51592	UP
MTERF3	0.926329	3.25032	9.3179	7.65299e-19	2.64196e-17	32.0838	UP
PLXNA3	0.925583	2.62548	7.5435	3.02841e-13	3.75938e-12	19.4602	UP
AGR3	0.924668	4.57699	2.43008	0.015528	0.0291236	-4.08611	UP
TMPRSS3	0.924514	2.55931	3.93642	9.72996e-05	0.000284396	0.558424	UP
CFTR	0.924177	2.20505	3.48928	0.000537345	0.00136761	-1.03745	UP
FOXP3	0.924144	1.74522	6.52154	2.0714e-10	1.57711e-09	13.0995	UP
TGS1	0.922999	3.11908	9.87632	9.26375e-21	4.73042e-19	36.4188	UP
COL4A2	0.922932	5.83243	5.02503	7.55957e-07	3.18815e-06	5.17502	UP
SSB	0.922493	3.85585	9.32507	7.23852e-19	2.5165e-17	32.1384	UP
PPIL1	0.922488	4.32615	9.05204	5.91583e-18	1.6999e-16	30.0769	UP
SCD	0.922002	5.15423	3.83138	0.000147592	0.000417229	0.167445	UP
PDIA3	0.921878	7.06444	8.50456	3.53328e-16	7.23991e-15	26.0672	UP
CCDC14	0.921844	1.96923	8.95854	1.20354e-17	3.22339e-16	29.3802	UP
CCL15	0.921747	1.73857	4.39715	1.40263e-05	4.79346e-05	2.38812	UP
FUCA2	0.921523	4.80477	8.63518	1.35224e-16	2.97161e-15	27.0084	UP
HES6	0.92141	2.71822	4.72949	3.1106e-06	1.18417e-05	3.82184	UP
ERN2	0.921269	3.4195	3.28991	0.00108964	0.00262452	-1.69072	UP
COL5A3	0.920549	2.20548	6.07963	2.78013e-09	1.7661e-08	10.5799	UP
NUDT5	0.920292	3.61295	9.62087	7.11493e-20	3.0357e-18	34.4161	UP
EFTUD2	0.919309	3.39856	10.9584	1.17625e-24	1.55613e-22	45.2402	UP
ADAM10	0.919105	3.10198	9.41656	3.5492e-19	1.32253e-17	32.838	UP
MORC4	0.918679	2.5523	7.14512	4.19588e-12	4.28323e-11	16.8951	UP
WDR90	0.918491	2.0753	8.02554	1.09831e-14	1.74596e-13	22.7025	UP
NUP188	0.91802	3.80943	9.12293	3.44166e-18	1.02947e-16	30.6083	UP
TNFRSF25	0.917659	1.89558	6.11407	2.28241e-09	1.48045e-08	10.771	UP
MEX3A	0.917612	1.18613	5.92362	6.72023e-09	4.01665e-08	9.72535	UP
MST1R	0.915869	3.53084	4.55832	6.83333e-06	2.4598e-05	3.07167	UP
PROM1	0.915282	3.08911	3.2977	0.00106066	0.00256033	-1.66589	UP
MRTO4	0.914742	3.80167	9.03866	6.55036e-18	1.86321e-16	29.9769	UP
RAE1	0.914318	3.12395	8.81609	3.51897e-17	8.67074e-16	28.328	UP
PRIM2	0.914004	2.02705	11.6029	4.44694e-27	1.23462e-24	50.7299	UP
SUV39H2	0.913917	2.15819	9.93998	5.54619e-21	2.95477e-19	36.9228	UP
ACAN	0.913907	0.950094	7.89529	2.73007e-14	4.07381e-13	21.8118	UP
OGT	0.913893	3.8194	7.06599	6.98434e-12	6.84611e-11	16.3984	UP
APLNR	0.913879	3.20778	4.55495	6.93846e-06	2.494e-05	3.05713	UP
POFUT1	0.913852	4.03571	6.66023	8.90802e-11	7.18179e-10	13.9198	UP
FOXA2	0.913036	3.38684	3.32144	0.000976596	0.00237184	-1.58982	UP
NASP	0.912893	3.23923	9.68253	4.36248e-20	1.91522e-18	34.8966	UP
CDK2	0.912679	3.09659	9.09295	4.32921e-18	1.27369e-16	30.3832	UP
AL138706.2	0.912611	1.31921	6.18233	1.53982e-09	1.02405e-08	11.1524	UP
DPH2	0.912084	3.40844	10.3526	1.90502e-22	1.49609e-20	40.2365	UP
CDCA3	0.911285	2.13735	6.87815	2.302e-11	2.06824e-10	15.2365	UP
GDPD5	0.910987	1.45926	6.3533	5.66075e-10	4.04e-09	12.1232	UP
ARFGAP1	0.910595	3.54902	9.03166	6.90895e-18	1.95114e-16	29.9246	UP
AC105009.1	0.910196	1.13805	6.01815	3.94527e-09	2.44634e-08	10.2409	UP
ZNF146	0.909141	4.35464	10.108	1.41868e-21	8.8218e-20	38.2627	UP
MNX1	0.908839	1.49497	7.58787	2.24549e-13	2.86307e-12	19.7523	UP
AUNIP	0.908499	1.35958	8.77732	4.70302e-17	1.12099e-15	28.0437	UP
U2SURP	0.908475	3.39965	9.76166	2.32244e-20	1.07717e-18	35.5158	UP
SLC43A3	0.908312	2.95768	5.77138	1.56256e-08	8.77024e-08	8.90948	UP
SLC25A32	0.908219	3.31696	9.92632	6.19258e-21	3.2814e-19	36.8145	UP
ATP6V1C1	0.908029	3.58557	9.51649	1.62148e-19	6.44409e-18	33.6072	UP
SCARB1	0.907971	3.10097	6.11162	2.31474e-09	1.49896e-08	10.7573	UP
DDR1	0.907922	4.90821	5.78632	1.43948e-08	8.14439e-08	8.98876	UP
LEFTY1	0.907344	1.0135	2.99972	0.0028687	0.00634086	-2.57632	UP
GABRP	0.906883	2.68033	2.24038	0.0256065	0.0456131	-4.52069	UP
HOXC6	0.906625	1.18545	6.57514	1.49742e-10	1.16992e-09	13.4148	UP
S100A10	0.906553	8.12946	4.6419	4.66706e-06	1.7257e-05	3.43485	UP
SF3B3	0.90649	4.0149	9.85763	1.07656e-20	5.38606e-19	36.2712	UP
CENPH	0.905954	2.09953	8.0998	6.50531e-15	1.07398e-13	23.2149	UP
SLC28A3	0.905806	1.34523	5.04534	6.84184e-07	2.9066e-06	5.27066	UP
PXDN	0.905202	2.97547	5.80275	1.31508e-08	7.50519e-08	9.07612	UP
TMEM176B	0.904812	6.0953	4.355	1.68685e-05	5.68589e-05	2.21307	UP
SPC24	0.904701	1.94021	8.02271	1.12044e-14	1.77827e-13	22.683	UP
SLC30A7	0.902496	3.14126	10.2423	4.72763e-22	3.32825e-20	39.3429	UP
ARHGAP4	0.90185	2.68682	5.14234	4.229e-07	1.86284e-06	5.7322	UP
LRRC8D	0.901829	2.90524	10.7045	1.01108e-23	1.00153e-21	43.1238	UP
SLC35A2	0.901547	3.87629	7.9415	1.97882e-14	2.99359e-13	22.1266	UP
PDSS1	0.901281	2.94231	6.49926	2.36915e-10	1.78862e-09	12.969	UP
ILF2	0.900592	6.04668	8.98507	9.84345e-18	2.69867e-16	29.5774	UP
BCL2L1	0.899849	5.11472	6.57918	1.46111e-10	1.14291e-09	13.4387	UP
HOXB6	0.899843	2.33009	4.46669	1.03117e-05	3.59376e-05	2.68032	UP
ELOVL7	0.899479	2.37071	5.68239	2.53807e-08	1.37977e-07	8.44095	UP
ZBTB33	0.898966	3.06206	9.91138	6.98548e-21	3.66218e-19	36.6961	UP
AP2B1	0.898765	5.35027	8.47139	4.50246e-16	9.06563e-15	25.8298	UP
ZNF469	0.898471	1.14499	7.15448	3.94939e-12	4.04208e-11	16.9541	UP
RALGAPA2	0.898463	3.42739	6.6846	7.66972e-11	6.26286e-10	14.0653	UP
INTS7	0.897528	2.7603	10.3181	2.53348e-22	1.93566e-20	39.9562	UP
SIPA1L3	0.897519	3.75418	6.32251	6.78943e-10	4.79689e-09	11.9467	UP
PARP9	0.896815	3.41118	7.5826	2.32686e-13	2.95345e-12	19.7176	UP
CD97	0.896378	4.41918	7.02825	8.89258e-12	8.57984e-11	16.163	UP
HOXB13	0.896053	1.59563	4.37543	1.5428e-05	5.23709e-05	2.29774	UP
BUB3	0.895596	3.73124	9.69587	3.92344e-20	1.73795e-18	35.0007	UP
MYBBP1A	0.895515	3.45991	7.89649	2.70737e-14	4.043e-13	21.82	UP
CENPI	0.895088	1.27305	9.98003	4.01231e-21	2.20924e-19	37.241	UP
FNDC3B	0.894917	3.37943	8.48648	4.03268e-16	8.17821e-15	25.9377	UP
ATP2A2	0.894769	4.93845	10.1411	1.08295e-21	7.02205e-20	38.5281	UP
AVL9	0.894687	2.63544	10.7004	1.04629e-23	1.03123e-21	43.0902	UP
NUP160	0.894417	3.00391	9.83831	1.25724e-20	6.21121e-19	36.1187	UP
MTMR11	0.894131	3.44334	4.90682	1.34241e-06	5.42689e-06	4.62504	UP
PNO1	0.893945	3.25077	11.7309	1.44132e-27	4.50972e-25	51.839	UP
COL27A1	0.893664	1.94482	5.68171	2.54743e-08	1.38409e-07	8.4374	UP
CHD7	0.892955	2.05641	8.59357	1.83826e-16	3.98196e-15	26.7075	UP
SLC25A22	0.892951	3.20324	6.86596	2.48509e-11	2.22159e-10	15.162	UP
AGO2	0.8925	2.86611	8.68734	9.19017e-17	2.08466e-15	27.3869	UP
HSP90B1	0.892466	7.39183	8.50603	3.49557e-16	7.17758e-15	26.0777	UP
JAG2	0.891935	2.31076	6.70098	6.93403e-11	5.6999e-10	14.1634	UP
PLBD2	0.891816	4.42051	10.0797	1.78686e-21	1.06691e-19	38.0359	UP
AMH	0.89174	1.04683	5.17548	3.58193e-07	1.60179e-06	5.89165	UP
RBBP8	0.891658	2.93687	7.69772	1.06482e-13	1.43569e-12	20.4813	UP
HN1L	0.891647	4.35871	9.50066	1.83631e-19	7.26855e-18	33.485	UP
NUP62CL	0.891611	1.31603	6.75086	5.09471e-11	4.30094e-10	14.4633	UP
AP1S3	0.890742	2.21557	6.99203	1.12028e-11	1.0627e-10	15.938	UP
SLC35F2	0.890623	2.80675	5.91195	7.17376e-09	4.27605e-08	9.66217	UP
SMS	0.890622	5.21506	8.67663	9.94971e-17	2.23636e-15	27.3091	UP
LRPPRC	0.890569	4.26729	8.78024	4.60152e-17	1.10481e-15	28.0651	UP
IARS	0.890157	4.30305	8.32536	1.29862e-15	2.42976e-14	24.7923	UP
AP1M2	0.88997	5.10753	4.80372	2.19494e-06	8.57276e-06	4.15483	UP
SNRPE	0.889796	4.96705	7.89301	2.77374e-14	4.13585e-13	21.7963	UP
MANEAL	0.889171	2.49432	4.7959	2.27751e-06	8.86714e-06	4.11954	UP
RANBP1	0.888265	4.43079	7.85625	3.57959e-14	5.22287e-13	21.5469	UP
PLSCR1	0.888129	4.40395	7.27978	1.74589e-12	1.91407e-11	17.7502	UP
ZC3HAV1L	0.888018	2.45864	7.10262	5.51966e-12	5.51184e-11	16.6278	UP
PLA1A	0.887866	1.8618	4.73098	3.08907e-06	1.17734e-05	3.82847	UP
CTSV	0.887788	1.7278	4.49712	9.00155e-06	3.16968e-05	2.80948	UP
LRRC8B	0.887328	2.37492	9.87876	9.08413e-21	4.65628e-19	36.438	UP
DIAPH3	0.887287	1.52433	8.39613	7.78395e-16	1.51468e-14	25.2935	UP
NCL	0.887135	5.93278	10.0865	1.6907e-21	1.0318e-19	38.0903	UP
SLC27A2	0.886788	2.35424	4.74449	2.9001e-06	1.11025e-05	3.88873	UP
SLC25A13	0.886568	3.37078	7.13764	4.40381e-12	4.47925e-11	16.8479	UP
SNRPG	0.886184	4.50157	8.18359	3.58808e-15	6.16636e-14	23.7973	UP
TFAP2A	0.885588	1.73242	4.96846	9.96429e-07	4.11343e-06	4.91038	UP
TFDP1	0.885352	4.91282	8.22456	2.67815e-15	4.69259e-14	24.0836	UP
HDGF	0.884677	6.56624	7.64923	1.4816e-13	1.94572e-12	20.1585	UP
SAA1	0.884557	3.35118	2.00819	0.045285	0.0754699	-5.00566	UP
TMEM206	0.883105	1.90079	10.9935	8.71482e-25	1.17662e-22	45.5353	UP
ATR	0.882796	1.89244	9.74559	2.64018e-20	1.21596e-18	35.3898	UP
DHX37	0.882201	2.57816	10.1467	1.03437e-21	6.75146e-20	38.5732	UP
GFPT1	0.882139	4.43095	6.50705	2.26056e-10	1.71332e-09	13.0146	UP
ODF2	0.882022	2.81128	10.3129	2.64373e-22	2.01209e-20	39.9143	UP
SCRIB	0.881976	4.5208	6.42579	3.67998e-10	2.69264e-09	12.5412	UP
TRAF4	0.88195	3.95325	6.59573	1.32115e-10	1.04087e-09	13.5366	UP
EME1	0.881882	1.1257	9.30879	8.2132e-19	2.78655e-17	32.0144	UP
DNAAF5	0.881571	3.21616	9.89835	7.75853e-21	4.03526e-19	36.593	UP
C1GALT1	0.881467	3.29215	7.33359	1.22573e-12	1.37988e-11	18.0953	UP
EIF2AK1	0.881179	5.24942	10.1861	7.49766e-22	4.99303e-20	38.8895	UP
TUBB	0.880873	7.53657	9.86271	1.03353e-20	5.19716e-19	36.3112	UP
KNOP1	0.880836	2.08891	11.2511	9.52643e-26	1.64724e-23	47.7135	UP
SH2D2A	0.880682	2.19517	7.09666	5.73549e-12	5.70999e-11	16.5904	UP
JRKL	0.880533	2.17534	10.2145	5.94104e-22	4.09475e-20	39.1183	UP
PNN	0.880355	4.2714	9.39173	4.30818e-19	1.59032e-17	32.6478	UP
F12	0.879764	1.84728	4.90874	1.33009e-06	5.38703e-06	4.63386	UP
ANXA13	0.879578	2.02227	2.99375	0.00292423	0.00644841	-2.59374	UP
POMK	0.879428	2.35331	6.18213	1.54161e-09	1.02489e-08	11.1513	UP
SKIL	0.879306	3.59882	6.69693	7.10919e-11	5.8293e-10	14.1392	UP
CD46	0.879257	4.89606	7.65853	1.39074e-13	1.83741e-12	20.2204	UP
WDR4	0.879212	2.41135	9.05605	5.73766e-18	1.65594e-16	30.1069	UP
TMEM74B	0.878499	1.53228	4.91373	1.29848e-06	5.2655e-06	4.65688	UP
C4BPB	0.878338	1.74202	4.23431	2.83802e-05	9.21025e-05	1.72028	UP
NIFK	0.878276	4.17719	9.41716	3.53259e-19	1.31883e-17	32.8426	UP
AHR	0.878188	4.78759	6.80779	3.57608e-11	3.11084e-10	14.8077	UP
STIP1	0.877586	5.01021	8.4249	6.31633e-16	1.24508e-14	25.4982	UP
TOP1	0.877248	5.42133	8.87699	2.22742e-17	5.67272e-16	28.7765	UP
NOL4L	0.877158	3.13968	6.9688	1.29852e-11	1.22004e-10	15.7941	UP
C5orf28	0.87712	2.60475	9.12482	3.39216e-18	1.01775e-16	30.6225	UP
PDP1	0.876973	2.98174	7.08194	6.3047e-12	6.23887e-11	16.4981	UP
CHEK2	0.876783	1.81544	8.97685	1.04765e-17	2.85563e-16	29.5163	UP
EEF1E1	0.876413	2.88556	7.36074	1.02464e-12	1.16818e-11	18.2702	UP
HN1	0.876366	5.0045	5.31931	1.72481e-07	8.11831e-07	6.59404	UP
PFAS	0.876184	2.38776	8.93037	1.48932e-17	3.93004e-16	29.1712	UP
CXCR4	0.87595	4.69003	3.90094	0.00011212	0.000324443	0.425268	UP
NUP205	0.875717	3.40694	8.62954	1.40981e-16	3.0878e-15	26.9675	UP
AGPAT5	0.875647	3.14062	6.90766	1.91167e-11	1.74172e-10	15.4175	UP
PTBP1	0.875524	5.76296	10.3791	1.5299e-22	1.23091e-20	40.4521	UP
SDCCAG3	0.875367	3.42321	10.0503	2.27036e-21	1.31241e-19	37.8006	UP
TSN	0.875125	4.15643	10.772	5.71931e-24	6.11336e-22	43.6843	UP
PTPRJ	0.874951	2.84843	6.82953	3.12207e-11	2.74864e-10	14.9399	UP
UTP20	0.874672	2.14625	10.1932	7.07204e-22	4.75781e-20	38.947	UP
ERBB2	0.874571	4.69005	3.20711	0.00144697	0.00339595	-1.95135	UP
PDGFB	0.87448	2.81569	6.68743	7.53727e-11	6.15981e-10	14.0823	UP
CCL4L1	0.874299	2.06669	4.33813	1.8154e-05	6.09016e-05	2.14343	UP
BCL2L12	0.874133	3.14851	6.76384	4.7007e-11	3.9871e-10	14.5416	UP
SERINC2	0.874114	6.08182	3.96857	8.54893e-05	0.000252686	0.680066	UP
DDX18	0.873737	3.54087	11.1071	3.29611e-25	4.99791e-23	46.492	UP
TBRG4	0.873551	3.56757	9.05481	5.79192e-18	1.66916e-16	30.0976	UP
CCNI2	0.873176	1.63873	6.43632	3.45565e-10	2.54171e-09	12.6023	UP
ATAD3A	0.872794	3.24976	7.20388	2.86607e-12	3.00032e-11	17.2667	UP
GART	0.872372	3.35749	9.66752	4.91496e-20	2.13871e-18	34.7794	UP
RNFT2	0.872282	1.16227	7.95198	1.83919e-14	2.80172e-13	22.1982	UP
TFB2M	0.871991	3.34643	8.94419	1.34158e-17	3.57369e-16	29.2737	UP
ERCC6L	0.87188	1.26259	8.95309	1.25422e-17	3.35001e-16	29.3397	UP
PKP2	0.871553	3.59887	5.46387	8.14129e-08	4.04438e-07	7.31679	UP
IFIT3	0.87155	3.79105	4.20861	3.16559e-05	0.000101778	1.61696	UP
CCT3	0.87137	5.77387	9.04517	6.23348e-18	1.77821e-16	30.0256	UP
HNRNPA2B1	0.871353	6.33763	10.9418	1.35517e-24	1.72265e-22	45.1009	UP
ACYP1	0.87053	2.30377	7.67618	1.23331e-13	1.6482e-12	20.3378	UP
DUSP4	0.870477	3.47066	3.87645	0.000123571	0.00035471	0.333999	UP
TAP2	0.870337	2.83474	6.5839	1.41976e-10	1.11411e-09	13.4666	UP
CHAF1B	0.870164	1.74722	8.49271	3.85306e-16	7.84624e-15	25.9824	UP
SNRPA1	0.869951	3.15229	9.26312	1.16993e-18	3.8372e-17	31.6672	UP
WISP1	0.869532	1.68027	5.40834	1.08833e-07	5.29056e-07	7.0372	UP
MCM5	0.869075	3.39398	7.09337	5.85808e-12	5.82616e-11	16.5698	UP
NID2	0.868235	2.45629	5.37109	1.32055e-07	6.32582e-07	6.85102	UP
TMEM33	0.868125	3.5365	9.25373	1.25806e-18	4.10576e-17	31.5959	UP
CENPL	0.86777	1.58397	11.0959	3.62776e-25	5.45881e-23	46.3976	UP
NCBP2	0.867754	3.56449	10.0975	1.54513e-21	9.52076e-20	38.1788	UP
CDH24	0.867534	1.9507	8.35269	1.06603e-15	2.03424e-14	24.9855	UP
C17orf96	0.867528	1.68672	5.40866	1.08653e-07	5.28309e-07	7.0388	UP
PRKX	0.866923	2.47065	6.78971	4.00246e-11	3.44075e-10	14.6981	UP
CDCA4	0.866088	3.14097	7.27637	1.78537e-12	1.95518e-11	17.7284	UP
SLC12A9	0.865862	2.75712	8.35658	1.03648e-15	1.97976e-14	25.0131	UP
CTSA	0.865481	5.60764	6.44707	3.24058e-10	2.39245e-09	12.6647	UP
ITGB8	0.865272	2.09439	5.61806	3.59066e-08	1.89858e-07	8.10609	UP
ARHGEF38	0.864861	1.17787	7.78559	5.83031e-14	8.20636e-13	21.07	UP
RNF207	0.864669	1.62693	7.03878	8.3141e-12	8.06137e-11	16.2285	UP
FBXO41	0.864471	1.58834	6.962	1.35576e-11	1.26958e-10	15.7521	UP
LRRC15	0.863366	1.40768	4.29579	2.18067e-05	7.20506e-05	1.9697	UP
SPIN4	0.863083	2.15193	6.24663	1.05952e-09	7.2493e-09	11.5149	UP
IGSF6	0.862818	2.18133	5.51256	6.29911e-08	3.18788e-07	7.56402	UP
LY75	0.862546	1.89656	7.13089	4.5999e-12	4.65229e-11	16.8055	UP
ARAP3	0.862528	2.22225	7.00559	1.02762e-11	9.78573e-11	16.0221	UP
ATXN2L	0.862508	4.86001	9.37818	4.78857e-19	1.75777e-17	32.544	UP
COTL1	0.862267	4.79708	5.03491	7.20176e-07	3.05156e-06	5.2215	UP
TRIB2	0.86196	3.25769	5.30691	1.83815e-07	8.61678e-07	6.53283	UP
PPRC1	0.861894	3.60543	9.68208	4.37829e-20	1.91789e-18	34.893	UP
GSDMB	0.86174	3.18284	3.80936	0.000160874	0.000452247	0.0867206	UP
FBXO5	0.86148	2.04863	8.66768	1.06324e-16	2.38166e-15	27.2441	UP
SGPL1	0.861405	3.61021	8.07495	7.75419e-15	1.26218e-13	23.0431	UP
PRKCG	0.86138	0.968456	4.81839	2.04768e-06	8.03102e-06	4.2212	UP
ATP2C1	0.861064	3.73358	9.20426	1.84278e-18	5.8683e-17	31.2213	UP
YEATS4	0.860848	3.4904	6.65156	9.3942e-11	7.53677e-10	13.8681	UP
FHOD1	0.86081	2.3853	10.58	2.87434e-23	2.61101e-21	42.0962	UP
SH2B3	0.86072	3.3488	7.40328	7.73043e-13	9.03809e-12	18.5452	UP
PRIM1	0.860585	2.20955	8.05826	8.72335e-15	1.40947e-13	22.9279	UP
PPA1	0.8603	4.99614	7.65129	1.461e-13	1.92123e-12	20.1722	UP
CDK12	0.859781	2.99257	7.49146	4.29437e-13	5.24152e-12	19.1191	UP
CLCN2	0.859365	2.18625	6.2481	1.05044e-09	7.1947e-09	11.5233	UP
NCOA7	0.858918	4.067	5.84687	1.03055e-08	5.9954e-08	9.31181	UP
SMYD5	0.858818	3.30413	10.7431	7.3031e-24	7.57678e-22	43.4438	UP
SBNO2	0.858756	4.15165	7.26063	1.97919e-12	2.14244e-11	17.6279	UP
TXNDC12	0.857279	4.67507	9.83924	1.24793e-20	6.19628e-19	36.126	UP
NRAS	0.857243	4.07663	8.24571	2.30194e-15	4.0953e-14	24.2318	UP
SLMO2	0.856911	5.32059	6.70165	6.90545e-11	5.68114e-10	14.1674	UP
FAM208B	0.856236	2.98271	9.67369	4.68001e-20	2.04098e-18	34.8275	UP
COA7	0.85574	2.69912	10.2413	4.76613e-22	3.34341e-20	39.3349	UP
ZNF267	0.855575	1.98519	10.9799	9.78611e-25	1.31227e-22	45.4212	UP
POLR1A	0.85531	2.80208	10.197	6.85246e-22	4.64177e-20	38.978	UP
CASP8	0.854731	2.81743	9.08708	4.52781e-18	1.32618e-16	30.3392	UP
CMTM6	0.854466	4.48781	9.15828	2.62441e-18	8.058e-17	30.8743	UP
CACYBP	0.854218	3.98148	8.33228	1.23535e-15	2.3236e-14	24.8412	UP
RPIA	0.852561	3.7276	7.06834	6.87993e-12	6.76058e-11	16.4131	UP
SRSF10	0.852462	3.31104	11.1396	2.49191e-25	3.86775e-23	46.7672	UP
TMEM62	0.852331	2.75585	8.48887	3.96296e-16	8.06171e-15	25.9548	UP
TRAM1	0.852286	6.01875	7.59036	2.20802e-13	2.8226e-12	19.7688	UP
MUC17	0.852262	2.91712	2.0875	0.0374659	0.0638864	-4.84584	UP
NMU	0.85183	2.53969	3.02262	0.00266474	0.00593329	-2.50927	UP
CIT	0.851805	1.70525	8.75484	5.5623e-17	1.31468e-15	27.8792	UP
ULBP2	0.851759	1.30667	4.42469	1.24234e-05	4.2798e-05	2.50333	UP
ERI1	0.851721	2.15784	8.31484	1.40089e-15	2.60268e-14	24.718	UP
NBEAL2	0.851718	3.98771	5.73699	1.88606e-08	1.0455e-07	8.72769	UP
TMEM123	0.851428	5.90606	8.04539	9.55147e-15	1.53092e-13	22.8391	UP
PSMD11	0.851356	4.20116	9.79017	1.84911e-20	8.80426e-19	35.7397	UP
DIEXF	0.851241	2.12048	11.6069	4.29228e-27	1.2087e-24	50.7647	UP
GMPS	0.851215	3.24126	9.99381	3.58887e-21	2.00407e-19	37.3506	UP
NRARP	0.850592	4.77226	4.67688	3.97204e-06	1.4843e-05	3.58859	UP
FAM102B	0.850528	2.66662	7.5442	3.01434e-13	3.74881e-12	19.4647	UP
PSRC1	0.850435	1.83084	7.07374	6.64562e-12	6.55977e-11	16.4468	UP
ATAD3B	0.849939	1.88252	8.16842	3.99744e-15	6.8223e-14	23.6915	UP
ZNF703	0.849623	5.24032	3.87906	0.000122302	0.00035138	0.343687	UP
ZNF281	0.849455	2.61002	11.4984	1.11037e-26	2.74474e-24	49.8291	UP
PATL1	0.849355	4.55697	9.72515	3.10767e-20	1.40569e-18	35.2297	UP
MTL5	0.848261	1.14145	7.78255	5.95385e-14	8.36509e-13	21.0495	UP
WDFY1	0.847972	3.80628	9.31655	7.73327e-19	2.66035e-17	32.0735	UP
ATP13A2	0.847743	4.15828	7.53807	3.14119e-13	3.89183e-12	19.4245	UP
ICA1	0.84749	3.05875	6.32186	6.81533e-10	4.81346e-09	11.943	UP
DRAM1	0.846246	3.0446	6.05714	3.16105e-09	1.98821e-08	10.4555	UP
SAA2	0.846184	1.33482	3.07617	0.00223867	0.00506063	-2.35057	UP
ENOPH1	0.845936	4.34165	9.20476	1.83566e-18	5.8551e-17	31.2251	UP
ATP10B	0.845359	2.49715	3.14178	0.0018023	0.00414356	-2.15252	UP
ASUN	0.844934	3.13731	7.36193	1.01661e-12	1.15969e-11	18.2779	UP
PRKCI	0.844734	4.0404	5.82969	1.13338e-08	6.5287e-08	9.21985	UP
SRSF2	0.844207	5.26735	9.36193	5.43474e-19	1.96246e-17	32.4197	UP
SASS6	0.843371	1.83699	9.42446	3.33668e-19	1.25281e-17	32.8987	UP
GOLGA8A	0.843263	1.87593	5.13547	4.37657e-07	1.92526e-06	5.69928	UP
PHF6	0.843032	2.22654	8.70123	8.28963e-17	1.90449e-15	27.488	UP
NAA25	0.842832	2.13772	10.8475	3.02078e-24	3.36416e-22	44.3122	UP
CCNO	0.842565	2.09967	5.30316	1.87384e-07	8.76859e-07	6.51433	UP
PNKD	0.842387	4.38687	5.96819	5.23213e-09	3.19009e-08	9.96757	UP
ZNF587	0.842292	2.45845	8.29633	1.60058e-15	2.94041e-14	24.5876	UP
PARP1	0.841903	4.48772	8.5384	2.75769e-16	5.78908e-15	26.3101	UP
MYO5C	0.841818	2.7086	6.2582	9.90294e-10	6.804e-09	11.5805	UP
TRRAP	0.841369	3.3462	7.24276	2.22445e-12	2.38306e-11	17.5139	UP
PSMD3	0.841186	4.84828	5.72025	2.06631e-08	1.13965e-07	8.63953	UP
TTC13	0.840715	2.61229	9.08503	4.59904e-18	1.34306e-16	30.3239	UP
CSPP1	0.840582	2.00624	9.17426	2.32121e-18	7.25129e-17	30.9948	UP
TMEM45B	0.840535	4.84041	3.38491	0.000781333	0.00193124	-1.38398	UP
SLC26A6	0.840446	2.28774	6.77842	4.29356e-11	3.67179e-10	14.6298	UP
PFKFB2	0.840176	2.50322	5.37617	1.28631e-07	6.17077e-07	6.87631	UP
BMS1	0.839816	2.93008	11.0573	5.04942e-25	7.00944e-23	46.0722	UP
GPX8	0.839234	2.46215	5.4523	8.6507e-08	4.27589e-07	7.25832	UP
IARS2	0.837761	4.88385	8.31699	1.37936e-15	2.56994e-14	24.7332	UP
SLC39A6	0.837603	3.77131	7.48517	4.479e-13	5.4299e-12	19.078	UP
RIF1	0.837533	2.30282	10.4524	8.32849e-23	7.04597e-21	41.05	UP
AC079907.1	0.837532	1.50737	4.42532	1.23888e-05	4.27011e-05	2.50598	UP
CARD10	0.83736	3.19378	6.02821	3.72636e-09	2.32009e-08	10.2961	UP
SQLE	0.83726	3.50263	4.35062	1.71937e-05	5.7886e-05	2.19496	UP
EIF3B	0.837124	4.46384	9.0207	7.50993e-18	2.10448e-16	29.8428	UP
TNFSF15	0.837022	1.73607	6.06831	2.96595e-09	1.87507e-08	10.5172	UP
FGD6	0.836981	2.28325	7.02002	9.37254e-12	8.9991e-11	16.1118	UP
DHCR7	0.836952	4.06425	4.98117	9.36708e-07	3.88479e-06	4.96959	UP
NUP62	0.836656	3.75153	9.75896	2.3729e-20	1.098e-18	35.4947	UP
RBP4	0.836492	2.49486	2.35279	0.0191094	0.0350535	-4.26731	UP
HSPA5	0.836194	7.30502	8.19146	3.39215e-15	5.85005e-14	23.8522	UP
POP1	0.835958	1.5793	9.51682	1.61722e-19	6.44013e-18	33.6098	UP
SUPT16H	0.835715	4.02297	9.16719	2.45079e-18	7.60786e-17	30.9415	UP
ADNP	0.8353	4.21343	8.91665	1.65185e-17	4.30136e-16	29.0697	UP
MDM2	0.835036	2.83729	5.76874	1.58535e-08	8.8897e-08	8.89549	UP
SLX4IP	0.834851	1.71411	9.7255	3.09901e-20	1.40569e-18	35.2324	UP
TIA1	0.834775	3.33075	7.54742	2.94961e-13	3.67526e-12	19.4859	UP
NXT2	0.834429	2.70083	6.76843	4.56851e-11	3.88333e-10	14.5694	UP
KIAA1598	0.834413	2.49023	7.62615	1.73288e-13	2.25321e-12	20.0055	UP
LARP1	0.834057	4.95564	9.59184	8.95147e-20	3.73838e-18	34.1906	UP
WBSCR22	0.833992	3.2638	9.59327	8.85084e-20	3.7042e-18	34.2017	UP
TWISTNB	0.833956	3.15217	9.31437	7.86563e-19	2.70117e-17	32.0569	UP
UTP14A	0.833823	2.97221	9.44903	2.75303e-19	1.04361e-17	33.0874	UP
ANKEF1	0.833269	2.05383	7.75843	7.027e-14	9.74095e-13	20.8875	UP
CAPRIN1	0.833266	5.19568	8.96105	1.18086e-17	3.18824e-16	29.3989	UP
DLL4	0.833108	2.13868	7.176	3.43531e-12	3.54724e-11	17.0901	UP
MIF	0.832974	5.99666	5.08339	5.67014e-07	2.44734e-06	5.4508	UP
RTN4R	0.832405	1.83155	6.00595	4.22755e-09	2.60883e-08	10.174	UP
NOL11	0.832249	3.32685	10.1871	7.43353e-22	4.98087e-20	38.898	UP
PKP3	0.832019	5.03458	4.10213	4.94807e-05	0.000153046	1.19511	UP
LAMA3	0.831956	2.97933	3.65379	0.000292265	0.000780959	-0.471179	UP
HIST3H2A	0.831793	2.9421	3.87679	0.000123406	0.000354344	0.335258	UP
SLC38A7	0.831587	2.45116	11.2677	8.25792e-26	1.46649e-23	47.8541	UP
ISYNA1	0.831534	3.00664	4.13406	4.33205e-05	0.000135416	1.32058	UP
IKBKE	0.831056	2.72539	6.76922	4.5461e-11	3.86595e-10	14.5742	UP
CREBZF	0.830914	3.16364	7.66541	1.32717e-13	1.7617e-12	20.2661	UP
CLMN	0.830279	2.18809	7.34995	1.10035e-12	1.25015e-11	18.2007	UP
NOC2L	0.830004	3.82992	7.36838	9.74148e-13	1.11707e-11	18.3195	UP
TOX3	0.829917	2.93131	4.12602	4.47982e-05	0.000139614	1.28892	UP
TMEM158	0.829844	2.95409	4.58866	5.95396e-06	2.15902e-05	3.20282	UP
FABP6	0.829781	1.27854	4.13924	4.23934e-05	0.000132771	1.341	UP
NUP43	0.829609	3.12235	9.78651	1.90398e-20	9.0437e-19	35.711	UP
LRRC59	0.829431	5.36741	7.58218	2.33339e-13	2.95983e-12	19.7148	UP
SNX8	0.829391	2.84401	8.19359	3.34099e-15	5.76687e-14	23.8671	UP
PKM	0.828749	6.76238	6.54125	1.83888e-10	1.40933e-09	13.2152	UP
FEZF1	0.828112	0.800993	5.39235	1.1827e-07	5.70984e-07	6.95715	UP
PRPF40A	0.828079	3.84401	11.5141	9.68551e-27	2.48741e-24	49.9636	UP
STK4	0.827824	3.22211	8.91488	1.67416e-17	4.34797e-16	29.0565	UP
NXPH4	0.827607	1.19485	3.77087	0.000186841	0.000518806	-0.0533351	UP
PRRX1	0.827491	1.99369	4.46452	1.04117e-05	3.62736e-05	2.67114	UP
CLCN4	0.82748	1.47413	5.49723	6.83039e-08	3.43471e-07	7.48597	UP
SMC1A	0.8274	3.75299	8.42099	6.4984e-16	1.27969e-14	25.4703	UP
SUZ12	0.827322	3.23656	9.27685	1.05201e-18	3.49701e-17	31.7714	UP
NPM3	0.82725	3.5134	5.41389	1.05737e-07	5.15146e-07	7.065	UP
ESCO2	0.827193	1.4833	7.36887	9.70969e-13	1.11407e-11	18.3227	UP
NFKB2	0.827101	4.28323	6.78933	4.01184e-11	3.44581e-10	14.6958	UP
NKRF	0.826891	1.9532	10.3041	2.84302e-22	2.14719e-20	39.8428	UP
QTRTD1	0.826818	1.9583	11.8652	4.39321e-28	1.57453e-25	53.0088	UP
SAMD12	0.826498	1.85449	6.93819	1.57641e-11	1.45888e-10	15.6052	UP
NUP85	0.826288	2.99932	10.7062	9.96324e-24	9.91896e-22	43.1383	UP
FRMD8	0.825975	3.72017	7.83113	4.25903e-14	6.1325e-13	21.377	UP
NUP37	0.825955	2.67207	8.8721	2.31093e-17	5.85515e-16	28.7404	UP
BAZ1A	0.825879	3.48991	7.8427	3.93141e-14	5.69823e-13	21.4553	UP
EPS8	0.825729	4.17164	6.09145	2.59839e-09	1.66405e-08	10.6453	UP
FNBP1L	0.825543	3.49795	6.85455	2.66955e-11	2.37679e-10	15.0923	UP
ODC1	0.825497	5.43169	5.55089	5.1408e-08	2.64101e-07	7.75992	UP
EPRS	0.825419	4.56894	8.69579	8.63155e-17	1.97155e-15	27.4484	UP
CFB	0.825214	2.72601	3.8595	0.000132134	0.000376991	0.271156	UP
ACP5	0.8251	4.05097	4.42352	1.24876e-05	4.3004e-05	2.49844	UP
SRSF1	0.825022	5.3021	10.5473	3.77715e-23	3.35383e-21	41.8276	UP
SRM	0.82491	5.84244	7.34056	1.17067e-12	1.3247e-11	18.1402	UP
MTDH	0.824885	5.23848	9.56162	1.13641e-19	4.64748e-18	33.9563	UP
SH3BP4	0.824729	4.12679	6.13585	2.01379e-09	1.31808e-08	10.8923	UP
DDX39B	0.824699	3.20154	6.16148	1.73716e-09	1.14601e-08	11.0355	UP
FCGR1A	0.824613	1.08915	6.80866	3.55675e-11	3.09813e-10	14.813	UP
EPT1	0.82449	2.9703	7.05454	7.5165e-12	7.32042e-11	16.3268	UP
SMC3	0.824444	4.28323	8.34428	1.13282e-15	2.1389e-14	24.926	UP
POLE	0.824234	2.20221	8.49846	3.69448e-16	7.53108e-15	26.0235	UP
KIAA0907	0.824072	2.9923	8.02244	1.12255e-14	1.78018e-13	22.6811	UP
FANCF	0.823996	2.47741	9.17042	2.3908e-18	7.43337e-17	30.9658	UP
NMB	0.823968	2.81603	5.02864	7.42705e-07	3.13763e-06	5.19198	UP
ANKIB1	0.823949	3.3816	6.41783	3.85874e-10	2.81404e-09	12.4952	UP
GINS4	0.823798	1.22622	8.96089	1.18233e-17	3.18824e-16	29.3976	UP
FAM81A	0.823782	1.23578	7.06766	6.9101e-12	6.78684e-11	16.4088	UP
IPO9	0.823591	3.28146	10.7115	9.53089e-24	9.53669e-22	43.1819	UP
ZC3H3	0.823483	3.83669	8.19992	3.19366e-15	5.52223e-14	23.9113	UP
CLCN5	0.823469	1.62507	7.66871	1.29769e-13	1.72721e-12	20.288	UP
POU2F1	0.823425	2.24412	9.68621	4.23699e-20	1.86845e-18	34.9252	UP
PTDSS1	0.823207	3.78267	8.57862	2.05208e-16	4.41102e-15	26.5996	UP
LRRC45	0.823098	2.7343	6.96429	1.33621e-11	1.25246e-10	15.7663	UP
FANCL	0.822843	2.67911	9.31382	7.89931e-19	2.70802e-17	32.0527	UP
ZNF28	0.821659	2.04371	6.8087	3.55574e-11	3.09813e-10	14.8133	UP
CEACAM7	0.821649	2.21632	2.28799	0.0226516	0.0408605	-4.41486	UP
SMARCC1	0.821288	4.14088	8.77128	4.91982e-17	1.17125e-15	27.9995	UP
PTPLAD1	0.821177	4.26086	6.9154	1.82062e-11	1.66766e-10	15.465	UP
TAF2	0.820891	3.06834	9.22306	1.5941e-18	5.1261e-17	31.3635	UP
SNRPB2	0.819933	4.61302	6.59069	1.36231e-10	1.0703e-09	13.5067	UP
TTF2	0.819396	1.90083	9.47663	2.21745e-19	8.57067e-18	33.2998	UP
HS2ST1	0.818496	2.74065	9.14956	2.80622e-18	8.56287e-17	30.8086	UP
DHX9	0.818299	4.98647	10.2174	5.80021e-22	4.01171e-20	39.1419	UP
NUFIP2	0.818263	3.57855	10.2844	3.34342e-22	2.45002e-20	39.6834	UP
MRPL3	0.818234	5.21378	9.32347	7.32913e-19	2.54352e-17	32.1262	UP
NOC3L	0.816804	2.39624	9.1272	3.33104e-18	1.00094e-16	30.6404	UP
TMEM87B	0.816599	3.95528	8.18581	3.53162e-15	6.08525e-14	23.8128	UP
P2RY6	0.816293	1.51502	6.29968	7.76555e-10	5.42433e-09	11.8164	UP
DCTPP1	0.816203	4.75218	6.32114	6.84434e-10	4.82876e-09	11.9389	UP
CYBA	0.816135	5.94894	4.58628	6.01902e-06	2.18101e-05	3.19247	UP
LRP11	0.816027	3.97131	7.40457	7.6644e-13	8.97154e-12	18.5536	UP
TIGD1	0.815818	1.40968	8.81373	3.58153e-17	8.80289e-16	28.3108	UP
ABHD2	0.814945	4.91971	4.34266	1.78e-05	5.97742e-05	2.1621	UP
CPD	0.81483	3.86246	5.7085	2.20269e-08	1.20878e-07	8.5778	UP
SEH1L	0.814822	2.41364	9.03572	6.69857e-18	1.90053e-16	29.955	UP
GAS2L3	0.814749	1.52724	7.63744	1.60514e-13	2.09401e-12	20.0803	UP
LRRC58	0.814675	3.48491	9.58396	9.52643e-20	3.95337e-18	34.1295	UP
NBN	0.814671	3.5367	8.51871	3.18564e-16	6.58923e-15	26.1687	UP
RRP1B	0.814496	3.41562	8.7876	4.35521e-17	1.04823e-15	28.119	UP
KIF24	0.813997	1.40647	8.10029	6.48291e-15	1.07207e-13	23.2183	UP
C1orf112	0.813591	1.31745	10.3777	1.54832e-22	1.24067e-20	40.4403	UP
CTSL	0.813115	4.77629	5.00949	8.15753e-07	3.42057e-06	5.10206	UP
EVA1A	0.811592	1.03046	5.63799	3.22588e-08	1.71854e-07	8.20947	UP
PVRL2	0.811365	5.66275	5.46142	8.24635e-08	4.09348e-07	7.30444	UP
HMGB2	0.810931	4.98301	5.92494	6.67099e-09	3.98964e-08	9.73247	UP
HIST1H2BH	0.810872	1.83134	4.04475	6.26981e-05	0.000190403	0.971913	UP
SFMBT1	0.810392	2.33039	8.73598	6.40167e-17	1.49691e-15	27.7414	UP
GEN1	0.810299	1.41192	9.62639	6.81049e-20	2.91844e-18	34.4591	UP
GLA	0.810164	3.60388	7.48793	4.39725e-13	5.34723e-12	19.096	UP
RAB25	0.810066	6.01008	3.94246	9.49689e-05	0.000278162	0.581207	UP
STEAP2	0.809856	2.70025	4.91689	1.27889e-06	5.18714e-06	4.67142	UP
EXOSC5	0.809834	3.89397	6.42002	3.80869e-10	2.77857e-09	12.5079	UP
ATAT1	0.809724	2.2767	8.21544	2.85858e-15	4.99543e-14	24.0198	UP
ZDHHC23	0.809697	1.64787	8.07638	7.6767e-15	1.25164e-13	23.0529	UP
MED14	0.809575	3.45306	8.16774	4.01683e-15	6.84354e-14	23.6868	UP
UBAP2	0.809547	3.09043	9.60099	8.32725e-20	3.50741e-18	34.2616	UP
FSTL3	0.809494	3.23415	3.80111	0.000166138	0.000465914	0.0565739	UP
IRAK2	0.809436	2.5654	5.07211	5.99559e-07	2.57428e-06	5.39727	UP
HYOU1	0.808954	4.69053	6.08689	2.66716e-09	1.70366e-08	10.62	UP
SET	0.808707	5.96418	9.34924	5.99869e-19	2.13441e-17	32.3228	UP
PALB2	0.807741	2.22937	10.2888	3.22377e-22	2.38554e-20	39.7193	UP
PPFIA1	0.807599	2.96688	8.32144	1.33576e-15	2.49107e-14	24.7647	UP
TAF4	0.807445	2.39964	8.68253	9.5237e-17	2.15041e-15	27.352	UP
SLC39A8	0.80678	2.18379	5.33564	1.58586e-07	7.4786e-07	6.67484	UP
LIN9	0.806693	1.84604	9.01497	7.844e-18	2.18391e-16	29.8001	UP
LMTK2	0.806637	3.26385	5.83292	1.11329e-08	6.42802e-08	9.23714	UP
C2orf82	0.806392	1.34124	4.71463	3.33372e-06	1.26204e-05	3.75573	UP
ERMP1	0.806361	3.16294	5.62163	3.52248e-08	1.86503e-07	8.12459	UP
SEC61G	0.8063	4.96215	5.22117	2.84491e-07	1.29095e-06	6.11294	UP
MARS2	0.806283	2.44135	8.06697	8.20353e-15	1.32984e-13	22.988	UP
CRACR2B	0.805892	3.17216	4.48008	9.71421e-06	3.39937e-05	2.73705	UP
PREP	0.805556	4.03884	6.89106	2.12242e-11	1.9209e-10	15.3156	UP
MYO19	0.804721	2.30848	8.39914	7.61592e-16	1.48492e-14	25.3149	UP
FAM136A	0.804433	4.12726	8.39296	7.96478e-16	1.54681e-14	25.271	UP
MIS18BP1	0.80414	2.42663	9.15884	2.61324e-18	8.03622e-17	30.8785	UP
RAB19	0.803557	1.7225	5.76743	1.59672e-08	8.93935e-08	8.88859	UP
MYO6	0.80295	3.89966	6.63804	1.02052e-10	8.15427e-10	13.7876	UP
UBFD1	0.802894	2.72022	10.2682	3.82135e-22	2.74914e-20	39.5521	UP
UPF3B	0.802873	3.10648	6.49003	2.50441e-10	1.87922e-09	12.915	UP
UBAP2L	0.80286	4.6702	11.0888	3.8538e-25	5.71173e-23	46.3381	UP
BRIP1	0.802836	1.17176	9.1277	3.31825e-18	9.98616e-17	30.6441	UP
FOXN2	0.802701	2.70249	8.73551	6.42414e-17	1.50039e-15	27.7379	UP
DBR1	0.80219	2.98548	6.38501	4.69095e-10	3.38711e-09	12.3056	UP
XPO4	0.801924	2.42755	8.06659	8.22543e-15	1.3312e-13	22.9854	UP
JPH1	0.801882	1.80297	4.30317	2.11233e-05	6.99099e-05	1.99986	UP
RPL7L1	0.801836	3.72375	8.58405	1.97181e-16	4.24791e-15	26.6387	UP
CCAR1	0.801296	3.84536	9.7457	2.6379e-20	1.21596e-18	35.3907	UP
NUDT15	0.800943	3.69814	7.25387	2.06875e-12	2.22838e-11	17.5847	UP
ACTR5	0.800889	2.50668	8.6917	8.8972e-17	2.02519e-15	27.4187	UP
TLR2	0.800579	1.78707	6.10816	2.36123e-09	1.52655e-08	10.7381	UP
CHST1	0.8003	1.41573	6.70859	6.61597e-11	5.4658e-10	14.2091	UP
ARHGEF1	0.80025	3.60469	7.61938	1.81424e-13	2.34815e-12	19.9607	UP
TMEM44	0.799979	1.93476	8.23695	2.45085e-15	4.32508e-14	24.1704	UP
USP43	0.799967	1.7043	7.06888	6.85613e-12	6.74055e-11	16.4164	UP
MRPS35	0.799965	5.22018	6.07845	2.79908e-09	1.77641e-08	10.5733	UP
GUCY2C	0.799228	2.35996	2.53451	0.0116353	0.0224066	-3.83225	UP
NUPL1	0.799099	2.65256	8.60687	1.66663e-16	3.62212e-15	26.8035	UP
TBC1D30	0.798964	1.37919	7.48971	4.34514e-13	5.29039e-12	19.1076	UP
PLAGL2	0.798915	3.62841	4.99161	8.90228e-07	3.70997e-06	5.01834	UP
ADCY3	0.798904	2.86061	7.46273	5.20382e-13	6.25093e-12	18.9316	UP
CDC123	0.798873	4.54892	8.68362	9.44751e-17	2.13811e-15	27.3599	UP
ALDH18A1	0.798813	4.99011	7.25959	1.99271e-12	2.15471e-11	17.6212	UP
MRM1	0.798787	2.42751	7.26206	1.96083e-12	2.1284e-11	17.637	UP
C5orf34	0.798696	1.18598	8.48218	4.16118e-16	8.43014e-15	25.907	UP
MTHFD1	0.798689	3.17824	8.05128	9.16351e-15	1.47334e-13	22.8797	UP
DNAJB11	0.798331	3.63376	7.51291	3.71937e-13	4.5583e-12	19.2595	UP
NME1-NME2	0.798273	4.27542	6.80942	3.53997e-11	3.08624e-10	14.8176	UP
NFXL1	0.798253	1.97549	8.77895	4.64605e-17	1.11144e-15	28.0556	UP
KIAA1217	0.798122	3.51951	6.57985	1.45516e-10	1.13871e-09	13.4427	UP
SPHK1	0.79812	2.09382	5.27221	2.19503e-07	1.01522e-06	6.3622	UP
FOXP4	0.797922	5.02024	5.40691	1.0965e-07	5.32764e-07	7.03	UP
NCLN	0.797909	4.87768	7.05514	7.48722e-12	7.2955e-11	16.3306	UP
SLBP	0.797688	4.79725	7.60198	2.0411e-13	2.62112e-12	19.8456	UP
LBH	0.79761	3.60211	4.90791	1.33538e-06	5.40404e-06	4.63005	UP
ACLY	0.797449	4.91083	6.56287	1.61313e-10	1.25074e-09	13.3425	UP
DDX31	0.797262	1.93561	10.5871	2.70837e-23	2.47521e-21	42.1547	UP
PTGES3	0.79723	6.23827	8.7491	5.80548e-17	1.3656e-15	27.8372	UP
TGDS	0.797202	2.86223	8.62168	1.49406e-16	3.25785e-15	26.9106	UP
MYO7B	0.797042	2.50511	2.6507	0.00834657	0.0166864	-3.53764	UP
TMSB10	0.796929	10.5678	5.4139	1.05728e-07	5.15146e-07	7.06508	UP
NARS2	0.796864	2.61621	7.85803	3.53569e-14	5.1668e-13	21.559	UP
DCLRE1B	0.796633	2.0603	10.1615	9.16479e-22	6.02188e-20	38.6922	UP
RANGAP1	0.796542	4.24243	8.2413	2.37571e-15	4.21512e-14	24.2009	UP
CD47	0.796476	3.98162	7.09779	5.69397e-12	5.67439e-11	16.5975	UP
CANX	0.796465	6.59411	8.75861	5.40797e-17	1.28281e-15	27.9067	UP
PGM3	0.796305	2.77077	7.45864	5.34799e-13	6.40459e-12	18.9049	UP
CEP131	0.795778	2.37681	7.48699	4.42488e-13	5.37385e-12	19.0899	UP
CXCL13	0.795729	3.26769	2.25373	0.0247459	0.0442602	-4.49123	UP
LZTS3	0.795683	2.96946	3.85927	0.000132256	0.000377229	0.270293	UP
HMGA2	0.795564	0.826214	4.95561	1.06057e-06	4.35903e-06	4.85064	UP
ARNTL2	0.795012	2.742	5.30375	1.86817e-07	8.74711e-07	6.51725	UP
ARL5B	0.79437	3.15404	6.74299	5.34923e-11	4.51194e-10	14.4159	UP
NIP7	0.794084	3.20893	8.85088	2.71061e-17	6.76349e-16	28.584	UP
DHX15	0.793876	4.02493	8.96511	1.14512e-17	3.10491e-16	29.429	UP
USP14	0.793753	3.85633	9.34098	6.39648e-19	2.26776e-17	32.2598	UP
TCF19	0.793533	3.02847	6.35538	5.59166e-10	3.99213e-09	12.1351	UP
ZMYND19	0.793445	3.0105	7.71933	9.18655e-14	1.24973e-12	20.6256	UP
OCLN	0.793407	2.58144	5.34784	1.48922e-07	7.07874e-07	6.73534	UP
MSI2	0.793346	2.34119	8.51349	3.30997e-16	6.82491e-15	26.1312	UP
KDM1B	0.793345	3.19378	6.99674	1.08715e-11	1.03277e-10	15.9672	UP
DNAJC10	0.792463	2.86327	8.85228	2.68223e-17	6.70116e-16	28.5943	UP
PAWR	0.792401	2.6234	9.46682	2.39479e-19	9.18407e-18	33.2243	UP
FOSL1	0.791958	3.35161	3.21801	0.0013944	0.00328432	-1.9174	UP
CYBB	0.79155	3.43623	3.70108	0.000244294	0.000662839	-0.303909	UP
PSMG1	0.791456	3.37434	6.4948	2.43365e-10	1.83367e-09	12.9429	UP
SLC12A2	0.791415	4.08198	3.67462	0.000270132	0.000726445	-0.397737	UP
PSMD1	0.790774	4.94279	8.86357	2.46394e-17	6.18717e-16	28.6775	UP
ANTXR1	0.790601	3.9736	3.66864	0.000276321	0.000741874	-0.418866	UP
ADAT1	0.789659	2.57902	9.81602	1.50333e-20	7.35328e-19	35.9431	UP
KIFC2	0.789374	2.1956	5.88357	8.40501e-09	4.95898e-08	9.50894	UP
BAAT	0.789101	0.756046	3.76024	0.000194678	0.000538897	-0.0917679	UP
PSMD14	0.788932	2.92842	10.0611	2.07796e-21	1.22271e-19	37.8876	UP
CHPF	0.7885	5.72516	5.35165	1.46022e-07	6.95261e-07	6.75427	UP
GNL2	0.78848	3.16819	10.9196	1.63677e-24	1.96732e-22	44.9151	UP
GNL3L	0.78793	3.81466	8.30983	1.45232e-15	2.69314e-14	24.6827	UP
POLA1	0.787895	2.32023	8.38085	8.69577e-16	1.67394e-14	25.185	UP
PRPF4	0.787505	3.47712	9.0458	6.20361e-18	1.77225e-16	30.0303	UP
CNPY2	0.787336	3.00778	7.83215	4.2289e-14	6.09358e-13	21.3839	UP
SEC23B	0.78724	4.54423	6.58337	1.42433e-10	1.1168e-09	13.4635	UP
MRPL47	0.787166	4.70143	7.57084	2.51904e-13	3.17692e-12	19.6401	UP
ZNF618	0.787124	1.97026	6.95278	1.43731e-11	1.33706e-10	15.6952	UP
CLDN6	0.787055	0.792561	2.58753	0.0100131	0.0196201	-3.69939	UP
NAA15	0.787043	2.87303	9.32182	7.42323e-19	2.57165e-17	32.1137	UP
CENPQ	0.786886	2.05808	7.80708	5.028e-14	7.1561e-13	21.2147	UP
STAT2	0.786717	3.84211	7.5182	3.58966e-13	4.40594e-12	19.2941	UP
RNF219	0.78669	1.92203	9.36921	5.13485e-19	1.87095e-17	32.4755	UP
RFC5	0.786375	2.81151	8.3475	1.10684e-15	2.0999e-14	24.9488	UP
NOL10	0.786287	3.2922	11.353	3.94154e-26	7.92812e-24	48.582	UP
JADE3	0.786271	2.08859	8.8076	3.75001e-17	9.18264e-16	28.2657	UP
RPRD1B	0.786117	3.3877	8.64614	1.24701e-16	2.76503e-15	27.0878	UP
GOLT1B	0.786035	3.52053	7.66129	1.36488e-13	1.8081e-12	20.2387	UP
ILF3	0.785963	4.43049	9.69543	3.93736e-20	1.74021e-18	34.9973	UP
SPTBN2	0.785794	2.20417	3.60438	0.000351778	0.00092642	-0.643838	UP
STX16	0.785216	3.3793	7.02733	8.94521e-12	8.62239e-11	16.1572	UP
CCNJ	0.78504	1.83265	9.26847	1.12253e-18	3.71262e-17	31.7078	UP
FAM19A5	0.784639	1.41789	5.11449	4.85914e-07	2.12471e-06	5.59889	UP
LSM5	0.784559	3.07576	7.82488	4.4469e-14	6.37044e-13	21.3348	UP
SUSD1	0.78423	2.42254	7.41572	7.11746e-13	8.37608e-12	18.6259	UP
TNRC18	0.78413	4.67645	5.9436	6.00806e-09	3.614e-08	9.83374	UP
COX19	0.783643	2.15824	8.85947	2.54116e-17	6.37295e-16	28.6473	UP
IRF7	0.783471	3.76348	4.87799	1.54157e-06	6.1563e-06	4.49267	UP
GRINA	0.782988	6.32726	6.54297	1.81986e-10	1.39584e-09	13.2253	UP
HES4	0.782541	3.79754	4.09961	5.00003e-05	0.000154532	1.18525	UP
ZBED6CL	0.782468	2.05357	6.6511	9.42082e-11	7.55505e-10	13.8654	UP
LRRC32	0.78224	3.49735	4.16802	3.75743e-05	0.000118925	1.45497	UP
LZTS1	0.782089	1.54659	5.81487	1.23004e-08	7.05048e-08	9.14073	UP
UGGT1	0.781765	3.66094	10.1059	1.44287e-21	8.94401e-20	38.2461	UP
EHMT2	0.781418	3.63312	7.95406	1.8127e-14	2.7635e-13	22.2123	UP
SUV39H1	0.78134	2.27172	7.69135	1.11215e-13	1.49643e-12	20.4388	UP
ATP13A1	0.78133	3.75912	8.54061	2.7132e-16	5.71395e-15	26.326	UP
CHORDC1	0.781245	1.83421	8.80279	3.88743e-17	9.47207e-16	28.2304	UP
OSCAR	0.780981	1.50989	5.85335	9.94201e-09	5.79299e-08	9.34653	UP
PPM1G	0.78087	4.84183	9.02	7.55005e-18	2.11102e-16	29.8376	UP
CPSF6	0.780628	3.49942	9.65908	5.25559e-20	2.27688e-18	34.7136	UP
CCNL2	0.78057	3.38635	6.28918	8.25955e-10	5.75511e-09	11.7565	UP
MRPL12	0.780513	4.07299	5.63354	3.30401e-08	1.75738e-07	8.18637	UP
TXLNG	0.779918	2.99916	7.76111	6.89896e-14	9.58097e-13	20.9055	UP
PDE7A	0.77987	2.22669	7.71162	9.68354e-14	1.31369e-12	20.5741	UP
YEATS2	0.779608	2.51497	9.17357	2.33362e-18	7.27854e-17	30.9896	UP
AEN	0.779324	2.59426	7.16452	3.7008e-12	3.80345e-11	17.0175	UP
AATF	0.779216	3.77135	7.4354	6.24388e-13	7.4055e-12	18.7537	UP
UTP6	0.779116	2.68595	10.6455	1.66062e-23	1.58136e-21	42.6358	UP
PSMB9	0.778841	4.37191	3.7956	0.000169739	0.000475269	0.0364978	UP
PCMTD2	0.778694	3.1073	6.41374	3.95394e-10	2.87814e-09	12.4715	UP
ETS1	0.778671	3.75921	5.17576	3.5768e-07	1.59986e-06	5.89302	UP
NFYA	0.778238	3.28455	7.61841	1.82626e-13	2.36216e-12	19.9542	UP
SAC3D1	0.777907	2.99894	6.38332	4.73821e-10	3.41872e-09	12.2958	UP
DOCK5	0.777488	2.30349	6.24412	1.07513e-09	7.35103e-09	11.5008	UP
CYP27B1	0.777069	1.03165	7.09739	5.70866e-12	5.68616e-11	16.5949	UP
STX3	0.776806	3.64921	5.70351	2.26334e-08	1.2393e-07	8.55157	UP
SLC39A1	0.776624	5.07306	7.33805	1.19023e-12	1.34452e-11	18.124	UP
DNAJA1	0.776394	5.73031	7.26023	1.9844e-12	2.14689e-11	17.6253	UP
ADAM9	0.776388	4.81487	4.67776	3.95581e-06	1.47964e-05	3.5925	UP
RAN	0.77632	5.59502	7.96545	1.67388e-14	2.57175e-13	22.2903	UP
HPS3	0.776013	2.74024	8.25823	2.10434e-15	3.7813e-14	24.3196	UP
SNX5	0.775967	3.78839	8.00709	1.25038e-14	1.96394e-13	22.5756	UP
MCCC2	0.775827	4.11611	7.52429	3.44586e-13	4.24796e-12	19.3341	UP
ITPA	0.775516	4.24026	6.91137	1.86749e-11	1.70663e-10	15.4402	UP
DDX56	0.775202	4.12618	9.25382	1.25715e-18	4.10576e-17	31.5966	UP
TMEM180	0.77507	2.14825	7.7931	5.53656e-14	7.81782e-13	21.1205	UP
FAM134B	0.774804	2.62817	3.74701	0.000204871	0.000564576	-0.139488	UP
IQCE	0.774749	2.85918	6.52605	2.01578e-10	1.53714e-09	13.1259	UP
TINAGL1	0.774524	4.46628	5.42454	1.0002e-07	4.8996e-07	7.11852	UP
KIAA1549	0.773857	1.38557	6.54837	1.76136e-10	1.35572e-09	13.257	UP
RMI1	0.773696	2.41708	8.02141	1.13072e-14	1.79026e-13	22.674	UP
HPSE	0.773506	1.87024	5.72526	2.01069e-08	1.11022e-07	8.66588	UP
MRPL17	0.773462	4.21035	8.41115	6.97998e-16	1.36769e-14	25.4003	UP
MORC2	0.773449	2.86234	9.89564	7.93009e-21	4.10283e-19	36.5715	UP
STK26	0.773415	3.36444	6.75742	4.89153e-11	4.13828e-10	14.5029	UP
NOC4L	0.77335	4.00897	7.10886	5.30211e-12	5.30804e-11	16.667	UP
FRMD5	0.773071	1.0578	6.81772	3.36112e-11	2.94072e-10	14.8681	UP
G3BP1	0.773033	3.91756	10.9202	1.62826e-24	1.96732e-22	44.9202	UP
DDX55	0.772976	2.04893	10.2539	4.2973e-22	3.06914e-20	39.4367	UP
ENO1	0.772818	7.38536	5.8449	1.0419e-08	6.05663e-08	9.30122	UP
TSEN54	0.772498	3.20555	7.20347	2.87377e-12	3.00678e-11	17.2641	UP
C1orf131	0.772238	2.15924	9.27729	1.04845e-18	3.49104e-17	31.7748	UP
FJX1	0.77203	1.81286	6.30628	7.47e-10	5.23644e-09	11.854	UP
TGFBI	0.771833	4.41906	3.75053	0.000202108	0.000557587	-0.126795	UP
CYB5B	0.771731	3.90074	6.40649	4.12852e-10	2.99748e-09	12.4296	UP
CD2AP	0.771309	4.3103	5.72874	1.97293e-08	1.09028e-07	8.6842	UP
NETO2	0.77099	1.17677	5.38879	1.20479e-07	5.81223e-07	6.93933	UP
TPR	0.770718	3.56481	8.3801	8.74309e-16	1.67976e-14	25.1797	UP
FUBP1	0.770594	4.02988	10.1149	1.34133e-21	8.47447e-20	38.3178	UP
REPIN1	0.770051	5.30402	6.18581	1.50908e-09	1.00496e-08	11.172	UP
PKP4	0.769978	3.43437	7.33311	1.22959e-12	1.38185e-11	18.0923	UP
WNT5A	0.769051	2.25432	4.55191	7.03467e-06	2.52628e-05	3.04402	UP
USP1	0.768941	3.56987	8.34719	1.10929e-15	2.10254e-14	24.9466	UP
ZNF600	0.768791	1.83259	7.33519	1.21287e-12	1.36774e-11	18.1056	UP
CEP85	0.768492	1.89288	7.98381	1.47207e-14	2.28483e-13	22.416	UP
SPTBN1	0.767756	5.17205	5.58369	4.31634e-08	2.24741e-07	7.9285	UP
DCLRE1A	0.767629	2.07209	8.08557	7.19378e-15	1.1768e-13	23.1165	UP
ASCC3	0.767589	2.68311	7.66551	1.32628e-13	1.7617e-12	20.2668	UP
VOPP1	0.767069	3.40183	6.27429	9.01314e-10	6.22971e-09	11.6718	UP
DENND4B	0.767028	3.04888	8.52769	2.98291e-16	6.22212e-15	26.2331	UP
LAMA5	0.766957	4.10588	4.09792	5.03526e-05	0.000155524	1.17863	UP
CHST13	0.766922	1.19604	3.516	0.00048751	0.00125046	-0.947156	UP
TCP1	0.766558	4.97827	7.66406	1.33946e-13	1.77586e-12	20.2571	UP
IL2RA	0.766475	1.54007	5.12095	4.70521e-07	2.06155e-06	5.62978	UP
PSME4	0.766172	3.2315	9.10617	3.91281e-18	1.15984e-16	30.4824	UP
AZIN1	0.76604	4.63543	7.83063	4.27378e-14	6.14925e-13	21.3736	UP
NSUN5	0.765906	3.21247	7.13643	4.43821e-12	4.50897e-11	16.8403	UP
WDR5	0.765808	3.7666	8.08062	7.44987e-15	1.21768e-13	23.0823	UP
B3GNT3	0.765807	5.20632	3.48945	0.00053701	0.00136694	-1.03688	UP
KDELR2	0.765709	6.5117	6.95336	1.43206e-11	1.33406e-10	15.6988	UP
SOD2	0.765472	4.05859	5.40412	1.11253e-07	5.39623e-07	7.01603	UP
PFDN2	0.765469	5.57583	7.12617	4.7423e-12	4.78405e-11	16.7757	UP
NAA40	0.765414	2.51211	8.74675	5.90816e-17	1.38645e-15	27.82	UP
AMMECR1	0.765301	2.28682	7.39812	7.99978e-13	9.31983e-12	18.5118	UP
HSPA9	0.765221	5.46839	7.86351	3.40391e-14	4.99984e-13	21.5961	UP
MTIF2	0.76507	3.47886	8.79286	4.18734e-17	1.01029e-15	28.1575	UP
KCNK1	0.76446	3.57215	3.85261	0.000135777	0.000385986	0.245658	UP
DAGLA	0.76432	2.05382	5.80945	1.26738e-08	7.24975e-08	9.11183	UP
ONECUT3	0.76424	1.43584	2.90064	0.00392646	0.00841652	-2.86081	UP
HAUS6	0.764221	1.90091	8.01757	1.1616e-14	1.83768e-13	22.6477	UP
GMFB	0.764113	3.01791	8.5318	2.89445e-16	6.05683e-15	26.2626	UP
SMPD4	0.763604	3.58767	9.16363	2.5187e-18	7.80073e-17	30.9147	UP
IYD	0.763217	1.4278	4.04785	6.19061e-05	0.00018823	0.98389	UP
WDR36	0.76259	2.70143	8.74703	5.89582e-17	1.3852e-15	27.8221	UP
BAG4	0.762554	2.57611	7.95076	1.85496e-14	2.82355e-13	22.1898	UP
JAK3	0.762262	2.1468	4.72058	3.24259e-06	1.23034e-05	3.78218	UP
SNAI1	0.761968	2.35586	5.48367	7.33642e-08	3.67324e-07	7.41709	UP
ZBED4	0.761935	2.74757	8.29884	1.57195e-15	2.8905e-14	24.6052	UP
HIP1	0.761148	2.60372	6.40276	4.22123e-10	3.0614e-09	12.408	UP
CSTF2	0.760787	3.31581	7.2612	1.97191e-12	2.13926e-11	17.6315	UP
TRIM28	0.760482	6.31113	6.41469	3.93184e-10	2.86311e-09	12.477	UP
C8orf76	0.760248	1.96905	8.95933	1.19639e-17	3.21298e-16	29.386	UP
CLPB	0.760217	2.81744	7.21996	2.5813e-12	2.73269e-11	17.3688	UP
FTSJ2	0.760186	3.29162	9.52769	1.48467e-19	5.93626e-18	33.6938	UP
TIPIN	0.75896	1.84745	9.33649	6.6237e-19	2.33154e-17	32.2255	UP
HAGHL	0.758919	1.14875	6.52977	1.97096e-10	1.50471e-09	13.1478	UP
TFAP4	0.758897	1.78192	8.92671	1.53112e-17	4.02418e-16	29.1441	UP
CHMP4C	0.758795	3.70911	4.32092	1.95618e-05	6.51464e-05	2.07264	UP
KAL1	0.758679	1.23628	5.70179	2.28452e-08	1.24986e-07	8.54258	UP
CTSH	0.758425	4.8114	4.06698	5.72215e-05	0.00017493	1.05805	UP
POLR3K	0.757947	2.78359	7.33659	1.20168e-12	1.35667e-11	18.1147	UP
EGFL6	0.757659	1.24893	5.23394	2.66664e-07	1.21622e-06	6.17512	UP
PA2G4	0.757551	5.21732	6.95823	1.3885e-11	1.29716e-10	15.7289	UP
DESI2	0.757108	3.53224	9.49112	1.97909e-19	7.75584e-18	33.4115	UP
F2RL1	0.757074	4.34617	3.3351	0.000931106	0.00226872	-1.54585	UP
BRAT1	0.756679	3.39092	7.42971	6.48522e-13	7.66867e-12	18.7167	UP
LCLAT1	0.756397	2.20095	9.032	6.89127e-18	1.94893e-16	29.9271	UP
HCFC1	0.756298	4.4822	6.71242	6.46168e-11	5.3473e-10	14.2321	UP
CDK5RAP1	0.756226	2.53381	9.49053	1.98842e-19	7.77691e-18	33.4069	UP
RNF114	0.756101	4.36627	8.15317	4.45529e-15	7.53842e-14	23.5854	UP
ESPL1	0.755834	2.04638	5.09192	5.43548e-07	2.35533e-06	5.49135	UP
HNRNPU	0.755815	5.3985	9.9894	3.71939e-21	2.06897e-19	37.3155	UP
EIF2S2	0.755746	5.49562	7.44783	5.74787e-13	6.85432e-12	18.8345	UP
ZNFX1	0.755701	3.9645	7.20512	2.84319e-12	2.97953e-11	17.2746	UP
SLC16A3	0.755691	3.06417	4.52596	7.90831e-06	2.81387e-05	2.93263	UP
RGS16	0.755446	2.63331	4.38017	1.51112e-05	5.13838e-05	2.31743	UP
FAM150A	0.754975	1.00822	5.22244	2.82669e-07	1.28298e-06	6.11912	UP
TET3	0.754909	2.35459	7.21763	2.62071e-12	2.77143e-11	17.354	UP
TRIM59	0.754657	1.1869	10.0536	2.20983e-21	1.28876e-19	37.8271	UP
KBTBD2	0.753656	3.33954	10.0777	1.8162e-21	1.0751e-19	38.0199	UP
ASXL1	0.753421	3.2765	7.60475	2.00322e-13	2.57584e-12	19.8639	UP
MAK16	0.753074	2.39762	8.37781	8.8892e-16	1.70451e-14	25.1635	UP
NOP14	0.752724	3.80494	8.08604	7.17025e-15	1.17392e-13	23.1197	UP
XPR1	0.752449	2.8617	7.87892	3.05889e-14	4.53019e-13	21.7006	UP
B3GALT6	0.752237	3.18731	7.13869	4.37383e-12	4.45335e-11	16.8546	UP
CXADR	0.752206	3.43612	4.28348	2.29936e-05	7.56551e-05	1.9195	UP
UBA2	0.751724	4.34124	7.91029	2.45968e-14	3.68709e-13	21.9138	UP
MRPL13	0.751481	3.28832	6.93975	1.56099e-11	1.44597e-10	15.6148	UP
AHCTF1	0.751303	2.88056	8.43577	5.83639e-16	1.15625e-14	25.5756	UP
TIMM8A	0.751282	1.97047	9.29461	9.16834e-19	3.09463e-17	31.9064	UP
NHS	0.751171	1.62412	5.69001	2.43543e-08	1.32837e-07	8.48081	UP
ETV5	0.751015	2.44715	4.88539	1.48794e-06	5.96145e-06	4.52655	UP
STC2	0.750804	1.17505	5.86369	9.38768e-09	5.48459e-08	9.40201	UP
KIF3B	0.75042	4.03724	6.78531	4.11345e-11	3.52694e-10	14.6715	UP
EFNB1	0.750356	4.51854	4.64935	4.50997e-06	1.66981e-05	3.46749	UP
MAGEA4	0.749874	0.697759	2.47485	0.0137365	0.026056	-3.97854	UP
TRAIP	0.749632	1.36278	8.28988	1.67659e-15	3.06861e-14	24.5421	UP
SSRP1	0.74946	4.53048	8.53592	2.80816e-16	5.8825e-15	26.2923	UP
PTRH2	0.749291	2.36485	9.20253	1.86745e-18	5.93729e-17	31.2082	UP
EBNA1BP2	0.749243	4.07872	8.48733	4.00758e-16	8.14407e-15	25.9438	UP
TESC	0.749156	4.2663	2.32335	0.0206534	0.0375607	-4.33484	UP
DCAF7	0.748881	4.45983	9.90226	7.51844e-21	3.93113e-19	36.6239	UP
AGTRAP	0.748866	3.82879	6.5643	1.59918e-10	1.24302e-09	13.3509	UP
TMEM185B	0.748704	4.0858	7.83899	4.03373e-14	5.82939e-13	21.4301	UP
GLS	0.748657	3.20252	5.31137	1.7966e-07	8.43605e-07	6.55482	UP
BCAP31	0.748338	5.8927	7.20573	2.83185e-12	2.96923e-11	17.2785	UP
MARVELD2	0.748229	2.92098	6.18524	1.51409e-09	1.00796e-08	11.1688	UP
BCL7A	0.748182	2.14515	7.72621	8.76399e-14	1.19637e-12	20.6716	UP
SRRT	0.747884	4.34003	8.93877	1.39766e-17	3.70689e-16	29.2335	UP
WDR76	0.747875	1.96909	7.20754	2.79878e-12	2.93767e-11	17.2899	UP
REEP4	0.747661	4.06051	5.34052	1.54645e-07	7.31198e-07	6.69905	UP
TRIM29	0.747646	2.37725	2.22737	0.0264703	0.046961	-4.54924	UP
STK3	0.747626	1.70931	10.1133	1.35856e-21	8.50156e-20	38.3053	UP
YBX2	0.747486	1.55167	3.97938	8.18344e-05	0.000242611	0.721159	UP
MYO1E	0.747467	3.61234	6.67683	8.0448e-11	6.53935e-10	14.0189	UP
GIT1	0.747397	4.04134	7.38134	8.94059e-13	1.03244e-11	18.4033	UP
ARRDC1	0.74724	4.18844	6.38936	4.57118e-10	3.30547e-09	12.3307	UP
QSER1	0.746614	2.52564	6.91349	1.84261e-11	1.68545e-10	15.4533	UP
CAPN15	0.746477	3.75235	5.9007	7.63933e-09	4.53574e-08	9.60134	UP
MRPL15	0.746465	5.03289	6.55752	1.66632e-10	1.28911e-09	13.3109	UP
FAM198B	0.746446	3.00094	4.50707	8.60883e-06	3.04067e-05	2.8519	UP
CPSF1	0.74585	4.41712	6.91439	1.83218e-11	1.67747e-10	15.4588	UP
PDRG1	0.745758	3.14421	7.02285	9.20458e-12	8.85076e-11	16.1294	UP
GPR4	0.74549	2.05091	6.63838	1.01839e-10	8.14048e-10	13.7896	UP
TNFSF13B	0.745122	2.45929	4.38805	1.45979e-05	4.97415e-05	2.35021	UP
DEK	0.745016	5.23527	7.55907	2.727e-13	3.41299e-12	19.5626	UP
CXCL2	0.74491	3.65207	2.77969	0.00569402	0.0118136	-3.19567	UP
EDEM2	0.744818	4.30091	7.1332	4.53178e-12	4.59283e-11	16.82	UP
CXorf38	0.744768	2.34056	8.32529	1.29919e-15	2.42976e-14	24.7918	UP
PLA2G16	0.74444	3.90087	3.57628	0.000390517	0.00101797	-0.741042	UP
XPO6	0.744339	4.02923	9.31231	7.99198e-19	2.72557e-17	32.0412	UP
SLC8B1	0.743854	2.78335	8.34791	1.10354e-15	2.09565e-14	24.9517	UP
CCT8	0.74376	5.26715	7.64586	1.51588e-13	1.98413e-12	20.1362	UP
ZNF587B	0.743381	1.79478	8.48691	4.02011e-16	8.16112e-15	25.9408	UP
CSTF3	0.743339	2.77915	10.2807	3.44809e-22	2.49885e-20	39.6531	UP
SLC39A5	0.743279	2.56482	2.30863	0.0214654	0.0388938	-4.36828	UP
POLR2H	0.742986	3.90101	7.22638	2.47551e-12	2.63342e-11	17.4096	UP
LTV1	0.742745	3.39591	8.25655	2.1298e-15	3.82007e-14	24.3079	UP
TCF20	0.742503	3.49984	7.06914	6.84458e-12	6.73591e-11	16.4181	UP
PIEZO1	0.74215	3.87266	6.01316	4.05846e-09	2.51099e-08	10.2135	UP
RTN4RL2	0.741977	1.45139	4.92044	1.25718e-06	5.10328e-06	4.68781	UP
RRN3	0.741924	3.35672	9.03501	6.73506e-18	1.90749e-16	29.9496	UP
CPSF3	0.741917	3.43011	9.70089	3.76988e-20	1.67747e-18	35.04	UP
TCERG1	0.741896	2.97908	9.88984	8.30908e-21	4.27646e-19	36.5256	UP
CCL3L3	0.741894	1.25206	4.42667	1.23148e-05	4.24683e-05	2.51167	UP
GNPDA1	0.741891	3.58375	7.36505	9.95821e-13	1.13861e-11	18.2981	UP
CLK2	0.741705	3.47494	8.54694	2.5901e-16	5.47811e-15	26.3715	UP
FANCG	0.741412	2.46136	6.87845	2.29761e-11	2.06523e-10	15.2384	UP
VMO1	0.741405	1.87998	3.93708	9.70421e-05	0.000283812	0.560914	UP
HIF1A	0.741302	5.29612	6.01226	4.07922e-09	2.52226e-08	10.2085	UP
PLA2G15	0.74069	2.52294	8.45923	4.91975e-16	9.86553e-15	25.7429	UP
NR2C1	0.740302	2.19038	9.19727	1.94471e-18	6.16305e-17	31.1685	UP
MFSD10	0.73995	4.43378	6.6537	9.27193e-11	7.44474e-10	13.8808	UP
FNBP4	0.739926	3.17713	7.27471	1.8049e-12	1.97437e-11	17.7178	UP
PIK3CB	0.739868	3.01717	7.85628	3.57886e-14	5.22287e-13	21.5471	UP
ZNF92	0.739682	2.25947	7.40187	7.80281e-13	9.11731e-12	18.5361	UP
EDN1	0.739564	2.95693	3.86545	0.000129069	0.000369101	0.293166	UP
ASAP1	0.739514	2.88981	6.7742	4.40779e-11	3.76295e-10	14.6042	UP
ZMYND15	0.739492	1.50064	6.4284	3.62302e-10	2.65787e-09	12.5564	UP
PSME3	0.739402	4.9498	8.84105	2.91812e-17	7.26288e-16	28.5116	UP
MEN1	0.739291	3.45703	7.37784	9.1505e-13	1.05544e-11	18.3806	UP
IKBIP	0.739174	2.06897	8.27201	1.90629e-15	3.45375e-14	24.4164	UP
PABPC1	0.739133	8.70904	6.20737	1.33168e-09	8.97441e-09	11.2932	UP
NOL8	0.739025	2.36602	9.55656	1.18263e-19	4.80661e-18	33.9171	UP
MYO10	0.738973	3.55162	5.49482	6.91783e-08	3.47602e-07	7.47371	UP
CD177	0.738736	1.31698	2.38221	0.0176687	0.0326967	-4.19901	UP
TAPBP	0.738572	6.30203	6.27779	8.82977e-10	6.11568e-09	11.6918	UP
NUP210	0.738408	2.95024	3.2904	0.0010878	0.00262072	-1.68916	UP
CILP2	0.738387	0.796036	4.69076	3.72469e-06	1.4009e-05	3.64992	UP
TUBA1C	0.738004	5.45042	5.47923	7.50987e-08	3.75436e-07	7.39458	UP
ANKS4B	0.737263	2.25209	3.84851	0.000137986	0.000391757	0.230527	UP
DOCK6	0.737168	2.85994	7.7944	5.48724e-14	7.76486e-13	21.1293	UP
FYB	0.736669	2.67642	4.06729	5.71481e-05	0.000174733	1.05926	UP
AP3M2	0.73662	1.8542	8.37846	8.84733e-16	1.69814e-14	25.1681	UP
HLA-B	0.736557	8.51959	4.05426	6.02977e-05	0.000183708	1.00869	UP
TRIM24	0.736465	2.81866	5.65218	2.9883e-08	1.602e-07	8.2833	UP
SERPINB9	0.736111	3.09339	4.4121	1.31331e-05	4.50932e-05	2.45058	UP
C2CD4D	0.736027	1.36317	6.19974	1.39202e-09	9.35861e-09	11.2503	UP
TM9SF4	0.735829	4.69934	7.89764	2.68595e-14	4.01711e-13	21.8278	UP
FBXO45	0.735733	2.3056	8.51141	3.36075e-16	6.91515e-15	26.1163	UP
HEXB	0.735535	4.55317	7.40836	7.47392e-13	8.75897e-12	18.5782	UP
PXYLP1	0.735495	1.69925	7.76193	6.86021e-14	9.55003e-13	20.911	UP
CLSTN3	0.735464	2.87805	5.34159	1.53794e-07	7.28048e-07	6.70436	UP
NR2C2AP	0.735216	3.10654	7.85204	3.68542e-14	5.36536e-13	21.5184	UP
EIF2AK2	0.735155	3.56816	7.25826	2.01021e-12	2.17006e-11	17.6127	UP
POGK	0.735047	3.33938	9.37033	5.0905e-19	1.86167e-17	32.484	UP
PIWIL4	0.735022	1.54848	6.03715	3.54188e-09	2.21081e-08	10.3453	UP
DDX10	0.734581	2.08675	9.72413	3.13309e-20	1.41326e-18	35.2217	UP
RFC2	0.73453	3.63008	6.92456	1.71829e-11	1.57833e-10	15.5213	UP
C4orf46	0.734134	2.10008	8.14378	4.76267e-15	8.03783e-14	23.5201	UP
ZNF165	0.734057	1.73724	6.71921	6.19628e-11	5.15146e-10	14.2729	UP
ARL6IP6	0.733941	2.88023	8.09784	6.59582e-15	1.08619e-13	23.2014	UP
LPGAT1	0.733658	3.27549	6.55983	1.64314e-10	1.27267e-09	13.3246	UP
SRSF6	0.733222	4.91445	8.20593	3.05941e-15	5.31808e-14	23.9533	UP
RLIM	0.733115	3.09434	8.06858	8.11074e-15	1.31723e-13	22.9991	UP
TRAF5	0.732711	1.98148	6.28844	8.29515e-10	5.77788e-09	11.7523	UP
GATA6	0.732492	4.33248	3.35658	0.000863498	0.00211418	-1.47631	UP
SMAD6	0.732178	2.15676	5.91932	6.88415e-09	4.10964e-08	9.70203	UP
DPM1	0.731722	5.15256	7.13194	4.56889e-12	4.62806e-11	16.8121	UP
YWHAG	0.731611	5.53353	8.05515	8.9165e-15	1.43714e-13	22.9064	UP
ARFGEF2	0.731214	3.71428	6.31034	7.29384e-10	5.11659e-09	11.8772	UP
ADRM1	0.731135	5.77922	6.61903	1.14623e-10	9.10697e-10	13.6746	UP
PADI2	0.73096	1.73352	3.62034	0.000331417	0.000876662	-0.588322	UP
CST4	0.730908	0.692569	4.35241	1.70606e-05	5.74573e-05	2.20233	UP
GAR1	0.73079	3.33838	7.62006	1.8059e-13	2.33889e-12	19.9652	UP
STK32C	0.730509	1.80661	5.66492	2.78966e-08	1.50327e-07	8.3497	UP
HSPA14	0.730161	2.79555	8.41945	6.57168e-16	1.29282e-14	25.4593	UP
PVRL1	0.730106	3.35612	3.88085	0.000121436	0.000349095	0.350355	UP
RQCD1	0.729993	3.4161	10.0815	1.76113e-21	1.05518e-19	38.0502	UP
SRC	0.729846	4.62967	5.67619	2.62475e-08	1.42492e-07	8.40853	UP
LYPLA1	0.729734	4.46919	6.68114	7.83463e-11	6.37903e-10	14.0447	UP
ARHGAP11B	0.729702	1.02584	9.16352	2.52083e-18	7.80073e-17	30.9138	UP
KDELC1	0.729318	1.80504	7.20804	2.78963e-12	2.92963e-11	17.2931	UP
NHLRC3	0.729232	2.40779	8.68232	9.5387e-17	2.15134e-15	27.3504	UP
SOX12	0.728907	2.88312	4.55095	7.0653e-06	2.53589e-05	3.03989	UP
C2orf15	0.728861	1.32239	8.38798	8.25748e-16	1.5958e-14	25.2357	UP
STAMBPL1	0.728759	1.52208	7.29358	1.5948e-12	1.76214e-11	17.8385	UP
MSC	0.728314	2.37861	4.63431	4.83261e-06	1.78123e-05	3.40163	UP
PFDN4	0.728286	3.46563	5.52117	6.01858e-08	3.05848e-07	7.60793	UP
LINGO1	0.728157	1.2828	4.92956	1.20309e-06	4.89481e-06	4.72991	UP
KDM1A	0.727991	3.87081	7.67423	1.24985e-13	1.66917e-12	20.3248	UP
TPP2	0.727975	3.16389	8.3508	1.08073e-15	2.05829e-14	24.9721	UP
NEK3	0.727836	1.96444	5.47362	7.73468e-08	3.85502e-07	7.36616	UP
MTG2	0.72781	2.72764	7.27918	1.75281e-12	1.92059e-11	17.7464	UP
LEMD1	0.727782	0.815633	5.15441	3.98124e-07	1.76197e-06	5.79016	UP
HNRNPF	0.727742	6.29078	8.29028	1.67175e-15	3.0626e-14	24.545	UP
ERO1L	0.727672	4.44609	4.76374	2.64982e-06	1.01954e-05	3.97491	UP
MUC20	0.727624	2.72277	2.63744	0.00867433	0.0172838	-3.57192	UP
GNS	0.727564	4.90172	6.30358	7.58932e-10	5.30933e-09	11.8386	UP
PTCD3	0.727362	2.78818	8.62199	1.49072e-16	3.25536e-15	26.9128	UP
NCOA6	0.727275	3.59274	8.02303	1.11789e-14	1.77565e-13	22.6852	UP
SLC19A3	0.727082	1.32131	3.19328	0.00151628	0.00354344	-1.99427	UP
TGM2	0.726775	5.1521	3.21391	0.00141395	0.0033254	-1.93018	UP
SAMD10	0.726586	2.89537	5.28684	2.03711e-07	9.47697e-07	6.43399	UP
RRM2B	0.726048	2.87166	6.8691	2.43659e-11	2.18418e-10	15.1812	UP
LSM8	0.725882	2.4424	7.35257	1.08143e-12	1.22936e-11	18.2176	UP
LASP1	0.725703	5.64735	5.70078	2.29709e-08	1.25639e-07	8.53728	UP
CSGALNACT2	0.725514	3.03965	6.46726	2.87148e-10	2.13595e-09	12.7822	UP
SLC7A1	0.72534	4.20614	5.27075	2.21147e-07	1.02234e-06	6.35503	UP
CD3EAP	0.725218	1.3318	8.41422	6.8261e-16	1.3402e-14	25.4221	UP
NOTCH1	0.724945	3.79794	4.7469	2.86759e-06	1.09887e-05	3.8995	UP
RAB11FIP1	0.724605	3.95057	3.96682	8.6096e-05	0.000254289	0.673415	UP
NLN	0.724287	1.9244	8.47817	4.28504e-16	8.64552e-15	25.8782	UP
LPAR2	0.724213	2.9466	5.63014	3.36508e-08	1.78745e-07	8.1687	UP
PODNL1	0.724021	1.27875	5.48554	7.26447e-08	3.64092e-07	7.42659	UP
EPHA2	0.723928	4.76183	3.38208	0.000789192	0.00194822	-1.39322	UP
PTPRG	0.723207	2.21314	6.32135	6.83604e-10	4.82463e-09	11.9401	UP
NCBP1	0.722662	3.36001	8.11325	5.91436e-15	9.84661e-14	23.3081	UP
S100A11	0.722571	9.78422	3.93843	9.65186e-05	0.000282365	0.565997	UP
CNOT11	0.72257	4.6171	8.69591	8.62377e-17	1.97155e-15	27.4493	UP
SLC35B2	0.722528	4.51669	5.83597	1.09468e-08	6.33352e-08	9.25344	UP
SFT2D2	0.722515	3.41879	8.7025	8.21164e-17	1.88877e-15	27.4973	UP
TBC1D31	0.721929	1.19144	9.87454	9.39738e-21	4.76198e-19	36.4047	UP
SPDYC	0.721648	0.735743	4.13175	4.37402e-05	0.000136598	1.31148	UP
ESCO1	0.72139	2.42517	7.48038	4.62501e-13	5.58287e-12	19.0467	UP
CCSAP	0.72111	1.76043	8.34975	1.08892e-15	2.0699e-14	24.9647	UP
SLC44A1	0.721015	3.85536	7.22436	2.50821e-12	2.66246e-11	17.3968	UP
SHFM1	0.721004	3.03901	5.8919	8.02346e-09	4.74096e-08	9.55388	UP
COCH	0.720946	1.10948	4.22242	2.98534e-05	9.63441e-05	1.67241	UP
ETV7	0.720641	2.73727	3.88834	0.00011788	0.000339468	0.37824	UP
SP140L	0.72059	2.28859	7.19481	3.04028e-12	3.16253e-11	17.2092	UP
RCCD1	0.720451	1.99168	7.74206	7.86229e-14	1.08076e-12	20.7777	UP
EXOSC8	0.720391	2.95914	7.06436	7.05771e-12	6.91115e-11	16.3882	UP
GTF2H3	0.720193	2.96791	8.6514	1.19944e-16	2.66856e-15	27.1259	UP
STT3B	0.720125	5.08697	7.53585	3.18833e-13	3.94776e-12	19.4099	UP
MOCOS	0.719963	1.98905	5.50487	6.56024e-08	3.31069e-07	7.52486	UP
GTF3A	0.719934	5.08353	6.39207	4.49838e-10	3.25641e-09	12.3463	UP
LTBP2	0.719168	3.54244	3.57099	0.000398235	0.00103576	-0.759241	UP
YWHAB	0.71916	6.99807	7.79047	5.63791e-14	7.94953e-13	21.1028	UP
UBXN4	0.719085	5.05275	9.23714	1.43001e-18	4.62103e-17	31.4702	UP
SMKR1	0.719052	0.97784	5.65633	2.92218e-08	1.56954e-07	8.3049	UP
FAM120A	0.718792	5.65975	8.06666	8.22151e-15	1.3312e-13	22.9858	UP
HSH2D	0.71877	2.70376	5.11445	4.86013e-07	2.12471e-06	5.59869	UP
IL27RA	0.718745	2.62412	4.80319	2.20049e-06	8.5893e-06	4.15242	UP
FAM83B	0.718621	2.40928	3.80635	0.000162773	0.000457129	0.0757321	UP
RNF24	0.718493	2.73919	6.28164	8.63296e-10	5.992e-09	11.7136	UP
CCDC137	0.718172	3.13394	7.43942	6.07919e-13	7.21886e-12	18.7798	UP
XAF1	0.717918	1.76278	5.15819	3.90641e-07	1.73157e-06	5.80838	UP
GCA	0.717618	2.8783	7.28709	1.66418e-12	1.82958e-11	17.797	UP
SMG7	0.717588	3.93097	9.09367	4.30536e-18	1.26857e-16	30.3886	UP
NKX6-3	0.717487	1.45721	2.62001	0.00912236	0.0180687	-3.6167	UP
SMG5	0.717294	4.48862	7.74127	7.90515e-14	1.0859e-12	20.7724	UP
DHX33	0.717256	2.46924	8.91926	1.61969e-17	4.22318e-16	29.0889	UP
PARP12	0.717078	3.33781	6.03725	3.53987e-09	2.21081e-08	10.3459	UP
CSTF1	0.716997	3.17602	8.89719	1.91303e-17	4.9101e-16	28.9257	UP
PRR5L	0.716986	1.40896	6.15593	1.79374e-09	1.18216e-08	11.0045	UP
C11orf84	0.716971	2.87455	6.0844	2.70534e-09	1.7247e-08	10.6063	UP
SNAPC4	0.716941	2.37956	7.87899	3.05733e-14	4.53019e-13	21.7011	UP
WDR12	0.716925	2.05554	8.87486	2.26337e-17	5.75685e-16	28.7608	UP
HMGXB3	0.716897	3.14268	9.38875	4.40951e-19	1.62468e-17	32.625	UP
LGALS9	0.716535	4.30363	3.83352	0.000146357	0.000413856	0.175319	UP
SS18L1	0.716203	2.35869	6.95681	1.40112e-11	1.30648e-10	15.7201	UP
MIPEP	0.716105	2.83737	6.91097	1.87224e-11	1.70939e-10	15.4377	UP
WDR46	0.716052	3.65202	8.75576	5.52426e-17	1.30725e-15	27.8859	UP
TAF1A	0.715943	1.56926	9.06439	5.38405e-18	1.55845e-16	30.1693	UP
HMGN1	0.715852	4.5677	7.00292	1.04525e-11	9.94885e-11	16.0055	UP
GJB4	0.715806	0.943413	4.6492	4.51291e-06	1.67058e-05	3.46687	UP
LAGE3	0.715731	4.20546	5.75698	1.69079e-08	9.41757e-08	8.83328	UP
TDG	0.715475	2.68103	8.57462	2.11342e-16	4.53317e-15	26.5708	UP
WDR3	0.715225	2.07093	8.32568	1.29558e-15	2.42762e-14	24.7946	UP
SMARCD1	0.715224	3.85079	8.59288	1.84768e-16	3.99797e-15	26.7025	UP
POMP	0.715131	6.21872	6.51807	2.11528e-10	1.60742e-09	13.0791	UP
ITGB1	0.714967	5.83178	5.41554	1.04827e-07	5.11219e-07	7.07332	UP
SEPHS2	0.714804	5.67792	4.61205	5.35153e-06	1.95496e-05	3.30443	UP
LRRC61	0.714617	3.08297	5.8139	1.23665e-08	7.08632e-08	9.13555	UP
TNFSF11	0.714602	0.852993	6.81907	3.33296e-11	2.91868e-10	14.8763	UP
DPY19L4	0.714574	2.5082	7.77432	6.30037e-14	8.82052e-13	20.9942	UP
C1orf27	0.714267	3.06624	8.30583	1.49479e-15	2.76409e-14	24.6545	UP
ARHGAP12	0.714236	3.54317	6.15908	1.76141e-09	1.16162e-08	11.0221	UP
STT3A	0.714194	4.3807	7.88587	2.91478e-14	4.33304e-13	21.7478	UP
PGF	0.713967	1.40295	6.72686	5.91027e-11	4.94077e-10	14.3188	UP
NUP98	0.713901	3.79981	7.96463	1.68352e-14	2.58454e-13	22.2847	UP
ABL2	0.713873	1.99709	9.31324	7.93449e-19	2.71536e-17	32.0483	UP
MSX1	0.713608	1.79398	4.75988	2.69824e-06	1.0374e-05	3.95762	UP
ITGB2	0.713188	3.13326	3.37627	0.000805592	0.00198448	-1.41222	UP
NONO	0.712966	5.89016	9.24341	1.36238e-18	4.42426e-17	31.5177	UP
RNF2	0.712863	2.64807	7.97885	1.52409e-14	2.35816e-13	22.382	UP
AGPS	0.712784	3.02472	8.83434	3.06879e-17	7.61864e-16	28.4623	UP
RPP40	0.712288	2.05565	6.75894	4.8456e-11	4.10471e-10	14.5121	UP
DENR	0.712188	4.21483	9.13621	3.10874e-18	9.41313e-17	30.7081	UP
ETV6	0.711577	3.55174	8.91642	1.65477e-17	4.30328e-16	29.0679	UP
GPRIN3	0.711532	1.7563	4.48661	9.43482e-06	3.30983e-05	2.76479	UP
TBL2	0.711428	3.31078	7.81303	4.82609e-14	6.87866e-13	21.2548	UP
NUDT1	0.711127	2.65735	6.4973	2.39736e-10	1.80852e-09	12.9575	UP
LUC7L3	0.710973	3.87511	5.49876	6.77553e-08	3.41147e-07	7.49374	UP
SLC11A1	0.710846	1.11324	5.88307	8.42813e-09	4.97113e-08	9.50629	UP
OTUD6B	0.710709	2.01245	7.5658	2.60612e-13	3.27626e-12	19.6069	UP
PLOD1	0.710619	4.6845	6.68445	7.67647e-11	6.26567e-10	14.0645	UP
BRMS1	0.710522	3.83797	6.75509	4.96264e-11	4.19303e-10	14.4889	UP
PRMT3	0.710092	2.08562	8.42588	6.2716e-16	1.2375e-14	25.5051	UP
NUP153	0.709918	3.70283	7.43481	6.26868e-13	7.43044e-12	18.7498	UP
C12orf5	0.7099	2.55125	7.49294	4.25202e-13	5.19305e-12	19.1288	UP
MED1	0.709768	3.14501	6.25122	1.0315e-09	7.07234e-09	11.5409	UP
HMBS	0.709501	2.39054	6.91109	1.87077e-11	1.70883e-10	15.4385	UP
FLAD1	0.709125	3.44275	8.44389	5.50162e-16	1.09433e-14	25.6334	UP
CIRH1A	0.708824	3.29705	8.06844	8.11907e-15	1.31723e-13	22.9981	UP
CDK4	0.708671	4.14551	5.64125	3.16969e-08	1.69142e-07	8.22643	UP
TYW1	0.708499	2.84072	9.79168	1.82689e-20	8.71955e-19	35.7516	UP
HIATL1	0.708439	4.43033	8.75911	5.38787e-17	1.27959e-15	27.9104	UP
RBM25	0.70815	3.65734	7.13556	4.4632e-12	4.53031e-11	16.8349	UP
GREM1	0.708135	3.75476	2.3196	0.0208577	0.0378937	-4.34338	UP
PTPN2	0.707887	2.56947	8.73018	6.68407e-17	1.55925e-15	27.699	UP
PLEK	0.707836	2.76907	3.29877	0.00105673	0.00255147	-1.66247	UP
PROCR	0.70756	4.12197	3.70147	0.000243932	0.000662099	-0.302523	UP
OSBPL10	0.707299	1.99824	7.07269	6.69065e-12	6.59761e-11	16.4402	UP
CHD1L	0.707192	3.6475	8.41024	7.0266e-16	1.37546e-14	25.3938	UP
FGFRL1	0.706747	3.64427	3.75306	0.000200152	0.000552576	-0.1177	UP
POLG2	0.706427	1.70141	9.2735	1.07968e-18	3.58292e-17	31.746	UP
RASEF	0.706267	2.85324	3.87123	0.000126152	0.000361387	0.314612	UP
RCBTB1	0.706191	2.73575	6.94011	1.55744e-11	1.44336e-10	15.617	UP
HDAC1	0.705978	5.23895	6.8674	2.4628e-11	2.20467e-10	15.1708	UP
AC091180.1	0.70569	1.0968	5.37017	1.32687e-07	6.35452e-07	6.84643	UP
RABGGTB	0.705686	2.93309	7.96939	1.62839e-14	2.51165e-13	22.3172	UP
DIP2B	0.705482	2.95832	7.15337	3.97777e-12	4.06901e-11	16.9471	UP
MEX3D	0.705448	3.89166	5.06575	6.18696e-07	2.6455e-06	5.36713	UP
MPZL1	0.705367	4.57111	9.29914	8.85196e-19	2.99297e-17	31.9409	UP
BAZ1B	0.705	4.28487	9.55791	1.17016e-19	4.76574e-18	33.9275	UP
PTK2	0.704894	3.21868	8.95993	1.19094e-17	3.2027e-16	29.3905	UP
GPR116	0.704817	2.50321	5.4944	6.93317e-08	3.48284e-07	7.47158	UP
VASH1	0.704731	2.01502	6.3293	6.52291e-10	4.6235e-09	11.9856	UP
NOP16	0.704481	2.85209	6.84289	2.87177e-11	2.54534e-10	15.0212	UP
SDC4	0.704052	6.67634	4.10285	4.9332e-05	0.000152706	1.19794	UP
CRNKL1	0.704052	3.17397	8.21815	2.8037e-15	4.90387e-14	24.0387	UP
DPM2	0.703743	4.09449	6.79003	3.99454e-11	3.43544e-10	14.7	UP
CNTNAP2	0.703584	1.07542	3.93777	9.67731e-05	0.000283067	0.563522	UP
S100A6	0.703516	9.33215	3.55597	0.000420967	0.00109071	-0.810848	UP
VRK1	0.703464	2.54241	6.71379	6.40742e-11	5.30685e-10	14.2403	UP
SLC45A4	0.703455	2.65704	5.83176	1.12049e-08	6.4658e-08	9.23091	UP
ZBTB41	0.703455	2.01175	7.65157	1.45815e-13	1.91876e-12	20.1741	UP
TRMT1	0.703408	3.02425	7.9176	2.33759e-14	3.52014e-13	21.9636	UP
MYOF	0.703266	4.20676	3.89115	0.00011657	0.000336087	0.388732	UP
FKTN	0.70313	2.12513	9.00145	8.69274e-18	2.40324e-16	29.6993	UP
LCP2	0.702976	2.42874	4.51786	8.20186e-06	2.90782e-05	2.89796	UP
ARID3A	0.702914	2.10981	3.60526	0.000350623	0.000923502	-0.640776	UP
BROX	0.702777	3.88179	8.46787	4.61927e-16	9.29133e-15	25.8047	UP
SF3B1	0.702361	4.91342	7.52454	3.44018e-13	4.24361e-12	19.3357	UP
RP9	0.7022	2.87592	7.00567	1.02709e-11	9.78537e-11	16.0226	UP
RPF2	0.702157	3.07456	7.65881	1.38816e-13	1.83524e-12	20.2222	UP
SF3B4	0.702117	5.72885	8.30179	1.53886e-15	2.83496e-14	24.6261	UP
CNPY3	0.701647	5.22903	6.23616	1.12623e-09	7.68175e-09	11.4557	UP
SUV420H2	0.701541	2.00813	6.97383	1.25769e-11	1.18393e-10	15.8253	UP
MTBP	0.701422	0.937295	9.50645	1.75458e-19	6.95899e-18	33.5297	UP
ZNF107	0.70124	1.61629	7.65959	1.38078e-13	1.82671e-12	20.2274	UP
TMEM139	0.701222	2.30511	3.57102	0.000398193	0.00103576	-0.759144	UP
PCGF2	0.701184	3.3484	5.37817	1.27299e-07	6.1137e-07	6.88632	UP
NAT9	0.701141	2.35526	8.56951	2.19444e-16	4.69673e-15	26.5339	UP
SNRNP200	0.70098	4.67444	7.17795	3.39213e-12	3.50448e-11	17.1024	UP
CUL4A	0.700728	3.63918	7.94661	1.90954e-14	2.90215e-13	22.1614	UP
KIAA0196	0.700713	4.00816	7.59977	2.07185e-13	2.65369e-12	19.831	UP
C9orf41	0.700684	2.53982	7.29301	1.6008e-12	1.76778e-11	17.8349	UP
SYNCRIP	0.700637	4.38917	8.10544	6.25049e-15	1.03799e-13	23.254	UP
ZKSCAN1	0.700584	3.94966	5.38922	1.20209e-07	5.80204e-07	6.94149	UP
DROSHA	0.700526	3.07662	8.32442	1.3074e-15	2.4428e-14	24.7857	UP
VWA9	0.700374	3.30751	9.47767	2.19954e-19	8.51814e-18	33.3078	UP
ALPP	0.700317	0.661974	3.57631	0.000390473	0.00101797	-0.740938	UP
TMEM200A	0.700058	1.54054	4.14479	4.14194e-05	0.000129927	1.36295	UP
EARS2	0.699983	2.46631	8.50503	3.52131e-16	7.22291e-15	26.0706	UP
RB1	0.699676	3.9386	6.36927	5.14992e-10	3.69012e-09	12.215	UP
ORC2	0.699181	2.57809	9.3203	7.5114e-19	2.59763e-17	32.1021	UP
ZNF789	0.699166	1.42003	7.74363	7.77805e-14	1.07068e-12	20.7883	UP
PPP4R2	0.699099	3.25963	8.46557	4.69761e-16	9.42966e-15	25.7882	UP
LARP4	0.6986	2.97155	7.76105	6.90188e-14	9.58097e-13	20.9051	UP
MTPAP	0.698371	1.98708	9.66448	5.03529e-20	2.18625e-18	34.7557	UP
LGR4	0.698042	3.98893	4.48078	9.68365e-06	3.38988e-05	2.74004	UP
IGFBP7	0.697875	7.6442	3.63523	0.000313419	0.000832182	-0.536309	UP
NAA10	0.697746	2.84723	7.60166	2.04549e-13	2.62333e-12	19.8435	UP
NEDD1	0.697692	2.62674	8.20449	3.091e-15	5.36354e-14	23.9432	UP
AP1G2	0.697373	2.68416	6.51286	2.18284e-10	1.65684e-09	13.0486	UP
TMEM164	0.697286	3.50768	5.29443	1.95949e-07	9.13778e-07	6.47135	UP
PLEKHG1	0.697186	2.41076	6.09969	2.47875e-09	1.59573e-08	10.691	UP
EXOSC2	0.695833	2.64829	8.5916	1.86516e-16	4.02694e-15	26.6932	UP
KCNAB2	0.695417	2.12203	5.26859	2.23592e-07	1.03295e-06	6.34446	UP
CCL4	0.695324	2.5745	3.34632	0.000895204	0.00218746	-1.50958	UP
KLF16	0.695079	3.99819	5.50985	6.38995e-08	3.23054e-07	7.55021	UP
ADCK5	0.695038	2.66593	5.7872	1.43254e-08	8.10975e-08	8.99344	UP
NRM	0.694932	3.55221	6.04143	3.45673e-09	2.16315e-08	10.3689	UP
PRKAA1	0.694803	4.18639	6.65007	9.48063e-11	7.59993e-10	13.8592	UP
TRIAP1	0.694796	3.8142	7.72411	8.8907e-14	1.21283e-12	20.6576	UP
ARHGEF16	0.694711	3.03579	4.32924	1.88686e-05	6.30189e-05	2.10683	UP
CCT4	0.694683	5.62189	8.04444	9.61541e-15	1.53972e-13	22.8326	UP
PCNXL3	0.694652	3.91535	6.42828	3.62561e-10	2.65878e-09	12.5557	UP
CNTD2	0.694575	0.837715	4.66436	4.20845e-06	1.56672e-05	3.53346	UP
FAF2	0.694518	3.71829	9.49235	1.96019e-19	7.71243e-18	33.4209	UP
C3AR1	0.694134	2.74277	3.61531	0.000337707	0.000891933	-0.605831	UP
SUCNR1	0.694119	1.06845	3.89621	0.000114252	0.000330128	0.407585	UP
OSGIN2	0.693796	2.65306	8.13828	4.95241e-15	8.33663e-14	23.4819	UP
PPP1R35	0.693591	3.96349	5.58521	4.2813e-08	2.23085e-07	7.93637	UP
GPR176	0.693537	1.40086	6.19095	1.46482e-09	9.79461e-09	11.2008	UP
CCR1	0.693472	2.19213	4.23098	2.87855e-05	9.33102e-05	1.70686	UP
C8orf33	0.693426	4.01366	6.72134	6.1155e-11	5.09719e-10	14.2856	UP
SAMD5	0.693282	2.41328	3.3694	0.000825367	0.00203015	-1.43462	UP
ABCF2	0.693204	3.77553	8.28326	1.75827e-15	3.20323e-14	24.4956	UP
SPR	0.693203	4.62962	5.42538	9.95833e-08	4.88183e-07	7.12274	UP
IL23A	0.69304	1.29652	4.68275	3.86553e-06	1.44834e-05	3.61452	UP
R3HDM1	0.692905	2.7246	9.42223	3.39519e-19	1.27236e-17	32.8816	UP
PRICKLE3	0.692798	2.80965	7.305	1.47955e-12	1.64032e-11	17.9117	UP
GORAB	0.692599	1.75414	9.97138	4.30341e-21	2.34334e-19	37.1721	UP
ELK4	0.692527	2.62996	8.03941	9.96268e-15	1.59145e-13	22.7979	UP
FTSJ1	0.69243	3.95513	8.16308	4.15207e-15	7.06174e-14	23.6544	UP
RIN1	0.692385	2.32559	4.76839	2.59259e-06	9.99514e-06	3.99577	UP
THBS1	0.692333	5.08584	2.84887	0.0046107	0.00974442	-3.00583	UP
AC090154.1	0.69204	1.2588	5.68253	2.5362e-08	1.37913e-07	8.44166	UP
EXOC6	0.691989	2.10506	8.39012	8.1309e-16	1.57752e-14	25.2508	UP
THOC6	0.691858	3.62346	6.82692	3.17342e-11	2.79261e-10	14.924	UP
CPOX	0.691518	2.87976	7.22153	2.55505e-12	2.70635e-11	17.3788	UP
SPAST	0.691514	2.64148	8.92169	1.59022e-17	4.16286e-16	29.1069	UP
MGAT4B	0.691421	5.19136	4.94917	1.09421e-06	4.48051e-06	4.82073	UP
EIF4EBP1	0.69138	5.58181	4.11033	4.78241e-05	0.000148341	1.22723	UP
SFXN1	0.691006	2.80614	7.0437	8.05631e-12	7.82296e-11	16.2592	UP
BTN3A2	0.690998	3.18688	5.25604	2.38354e-07	1.09725e-06	6.283	UP
ACBD5	0.690929	3.63964	5.77823	1.50489e-08	8.48259e-08	8.94582	UP
SPINT1	0.690611	5.97483	3.55264	0.000426169	0.00110317	-0.822261	UP
MSH5	0.690522	0.922827	7.46332	5.18326e-13	6.23003e-12	18.9354	UP
RAD18	0.690037	1.82437	8.33549	1.20706e-15	2.27472e-14	24.8639	UP
HHEX	0.689438	2.30987	3.98951	7.8542e-05	0.000233729	0.759791	UP
HOXC13	0.689256	0.66526	3.82498	0.000151343	0.000427157	0.143932	UP
MROH1	0.689153	2.99066	6.49204	2.47445e-10	1.85885e-09	12.9267	UP
FUS	0.688813	4.32664	8.26076	2.06643e-15	3.71995e-14	24.3374	UP
APOL4	0.688551	1.84903	4.6475	4.54838e-06	1.68339e-05	3.4594	UP
[truncated: 2,938 more rows]
