# Supplementary material for: Prognostic value of RNA methylation-related genes in gastric adenocarcinoma based on bioinformatics
Source: PeerJ. 2024 Feb 29;12:e16951. doi: 10.7717/peerj.16951 (PMC10909369; doi:10.7717/peerj.16951)
Supplement: Supplemental Information 13 [file peerj-12-16951-s013.xlsx]

## Sheet: Sheet1
	logFC	AveExpr	t	P.Value	adj.P.Val	B	change
MYBL2	1.14862	4.81838	9.31356	1.47343e-18	1.16809e-16	31.4737	UP
SAPCD2	1.1099	3.57405	10.8863	6.22748e-24	1.63675e-21	43.6203	UP
CDT1	1.10215	3.23823	12.6726	1.70567e-30	2.24148e-27	58.4755	UP
FOXM1	1.06104	3.7711	11.0753	1.31959e-24	4.26422e-22	45.145	UP
TPX2	1.05618	4.63671	9.64298	1.2027e-19	1.19134e-17	33.9311	UP
MCM2	1.0406	3.66879	13.5337	8.67603e-34	5.70073e-30	65.9348	UP
CDC20	1.02732	4.51536	9.90035	1.64215e-20	2.01056e-18	35.8848	UP
CDCA5	1.01637	2.78009	13.025	7.8043e-32	1.71501e-28	61.5092	UP
BIRC5	1.00605	3.11869	11.6893	7.86026e-27	4.5571e-24	50.1806	UP
LMNB1	1.00228	3.95021	12.2643	5.84874e-29	5.01262e-26	54.9992	UP
CRYAB	-1.00025	2.51119	-7.01217	1.23748e-11	2.66011e-10	15.887	DOWN
MYLK	-1.00948	3.09384	-5.89494	8.90444e-09	1.06378e-07	9.50322	DOWN
TM4SF4	-1.0153	2.37235	-4.54273	7.68065e-06	4.60937e-05	3.01414	DOWN
PRELP	-1.03556	2.7733	-5.84005	1.20312e-08	1.38918e-07	9.2124	DOWN
C7	-1.05327	2.24933	-5.15552	4.26315e-07	3.4119e-06	5.77673	DOWN
ACKR1	-1.05495	2.58768	-6.48488	3.06675e-10	4.93888e-09	12.7663	DOWN
ITLN1	-1.05595	2.15905	-4.31171	2.11518e-05	0.000115561	2.05278	DOWN
ACTA2	-1.05846	6.31763	-6.68287	9.38716e-11	1.68218e-09	13.9161	DOWN
HSPB8	-1.05884	2.7814	-6.28927	9.62419e-10	1.40216e-08	11.6569	DOWN
VSIG2	-1.06127	4.01797	-4.65668	4.58758e-06	2.91805e-05	3.50468	DOWN
FLNC	-1.07087	3.10936	-5.02671	8.02035e-07	6.05041e-06	5.17089	DOWN
LIPF	-1.0735	2.68286	-2.89635	0.00401538	0.0118917	-2.8246	DOWN
CHRDL2	-1.09769	2.62666	-5.80999	1.41741e-08	1.60299e-07	9.05406	DOWN
MYL9	-1.10028	6.46781	-5.93576	7.10876e-09	8.67665e-08	9.72094	DOWN
SYNM	-1.10848	2.65019	-4.91823	1.35219e-06	9.67493e-06	4.67093	DOWN
CTSE	-1.11101	5.99831	-3.74517	0.000211087	0.000886439	-0.112191	DOWN
C2orf40	-1.11416	1.51491	-6.44375	3.90902e-10	6.16931e-09	12.5308	DOWN
MUC6	-1.12312	3.24702	-3.68163	0.000268745	0.00109903	-0.337594	DOWN
TAGLN	-1.12771	5.71215	-6.0213	4.41744e-09	5.59978e-08	10.1811	DOWN
HSPB7	-1.12844	2.09814	-6.16136	2.00438e-09	2.76683e-08	10.9461	DOWN
TPM2	-1.13007	5.19145	-7.15347	5.07791e-12	1.19162e-10	16.7544	DOWN
PDK4	-1.16751	3.36465	-7.00996	1.25471e-11	2.69421e-10	15.8735	DOWN
SPARCL1	-1.1699	5.53435	-7.6084	2.65246e-13	7.93402e-12	19.6328	DOWN
PLN	-1.178	2.47201	-6.41092	4.74045e-10	7.38102e-09	12.3437	DOWN
DPCR1	-1.18158	2.98656	-4.06364	5.98286e-05	0.000290407	1.07073	DOWN
MFAP4	-1.19195	5.25393	-6.6895	9.01794e-11	1.62785e-09	13.9551	DOWN
FHL1	-1.19997	3.29282	-6.83863	3.63157e-11	7.03889e-10	14.8394	DOWN
GKN1	-1.20346	2.82395	-3.09188	0.00215046	0.00690726	-2.25769	DOWN
MUC5AC	-1.23277	3.31537	-4.16423	3.94841e-05	0.000201474	1.46263	DOWN
ANXA10	-1.23291	3.58898	-4.58325	6.40213e-06	3.92043e-05	3.18734	DOWN
OGN	-1.26436	2.24365	-6.54385	2.16147e-10	3.58342e-09	13.1059	DOWN
REG4	-1.28388	4.83663	-4.09665	5.22492e-05	0.000258065	1.19837	DOWN
MGP	-1.28672	5.49032	-7.25987	2.57498e-12	6.32105e-11	17.416	DOWN
PSCA	-1.32693	4.103	-4.09728	5.21137e-05	0.00025746	1.20082	DOWN
TFF1	-1.3369	7.11932	-3.91113	0.000110574	0.000501179	0.493258	DOWN
APOD	-1.34766	4.23645	-5.99083	5.23629e-09	6.5535e-08	10.0166	DOWN
LMOD1	-1.36567	3.23027	-6.84789	3.43069e-11	6.68429e-10	14.8947	DOWN
SYNPO2	-1.38128	2.86099	-6.37394	5.88531e-10	8.9792e-09	12.1338	DOWN
SPINK4	-1.47613	2.81262	-5.18081	3.76e-07	3.04383e-06	5.89724	DOWN
CNN1	-1.5134	4.31853	-6.021	4.4247e-09	5.60538e-08	10.1795	DOWN
TFF2	-1.57314	4.855	-4.33687	1.89815e-05	0.000104925	2.15532	DOWN
ACTG2	-1.68125	5.15772	-6.13696	2.30245e-09	3.13871e-08	10.8118	DOWN
HSPB6	-1.69565	4.29999	-6.66506	1.04528e-10	1.84794e-09	13.8116	DOWN
MYH11	-1.72791	4.43894	-6.31964	8.07253e-10	1.19017e-08	11.8274	DOWN
PGC	-1.87264	5.63763	-4.48807	9.79864e-06	5.75196e-05	2.78265	DOWN
DES	-1.93718	5.34937	-5.7175	2.33737e-08	2.51223e-07	8.57115	DOWN
