# Supplementary material for: Prognostic value of RNA methylation-related genes in gastric adenocarcinoma based on bioinformatics
Source: PeerJ. 2024 Feb 29;12:e16951. doi: 10.7717/peerj.16951 (PMC10909369; doi:10.7717/peerj.16951)
Supplement: Supplemental Information 14 [file peerj-12-16951-s014.xlsx]

## Sheet: Sheet1
GO
ONTOLOGY	ID	Description	GeneRatio	BgRatio	pvalue	p.adjust	qvalue	geneID	Count
BP	GO:0006936	muscle contraction	13/52	352/18862	8.8e-12	7.73e-09	6.24e-09	TPM2/CRYAB/LMOD1/ACTA2/HSPB6/PLN/MYH11/ACTG2/CNN1/MYL9/MYLK/DES/SYNM	13
BP	GO:0003012	muscle system process	13/52	453/18862	2.02e-10	8.86e-08	7.16e-08	TPM2/CRYAB/LMOD1/ACTA2/HSPB6/PLN/MYH11/ACTG2/CNN1/MYL9/MYLK/DES/SYNM	13
BP	GO:0007586	digestion	5/52	138/18862	3.84e-05	0.00843587	0.00681666	PGC/TFF2/TFF1/MUC6/GKN1	5
BP	GO:0006939	smooth muscle contraction	4/52	100/18862	0.000165629	0.0242371	0.0195849	ACTA2/MYH11/CNN1/MYLK	4
BP	GO:1902850	microtubule cytoskeleton organization involved in mitosis	4/52	143/18862	0.000646556	0.0557402	0.0450413	SAPCD2/CDC20/TPX2/MYBL2	4
BP	GO:0030277	maintenance of gastrointestinal epithelium	3/52	22/18862	2.93e-05	0.00843587	0.00681666	TFF2/TFF1/MUC6	3
BP	GO:0010669	epithelial structure maintenance	3/52	29/18862	6.86e-05	0.0120543	0.00974055	TFF2/TFF1/MUC6	3
BP	GO:0032387	negative regulation of intracellular transport	3/52	57/18862	0.00052058	0.0507854	0.0410375	CRYAB/PLN/APOD	3
BP	GO:0048662	negative regulation of smooth muscle cell proliferation	3/52	63/18862	0.00069834	0.0557402	0.0450413	OGN/CNN1/APOD	3
BP	GO:0090307	mitotic spindle assembly	3/52	65/18862	0.000765163	0.0559844	0.0452386	CDC20/TPX2/MYBL2	3
BP	GO:0048251	elastic fiber assembly	2/52	10/18862	0.000330744	0.0414847	0.033522	MFAP4/MYH11	2
BP	GO:0042340	keratan sulfate catabolic process	2/52	12/18862	0.00048338	0.0507854	0.0410375	OGN/PRELP	2
CC	GO:0043292	contractile fiber	10/54	231/19520	6.73e-10	7.87e-08	5.45e-08	TPM2/CRYAB/LMOD1/ACTA2/SYNPO2/MYH11/MYL9/DES/FLNC/SYNM	10
CC	GO:0030016	myofibril	8/54	224/19520	1.75e-07	1.03e-05	7.11e-06	TPM2/CRYAB/LMOD1/SYNPO2/MYL9/DES/FLNC/SYNM	8
CC	GO:0030017	sarcomere	7/54	203/19520	1.39e-06	5.42e-05	3.75e-05	TPM2/CRYAB/LMOD1/SYNPO2/MYL9/DES/FLNC	7
CC	GO:0030018	Z disc	5/54	122/19520	2.17e-05	0.000635934	0.000440548	CRYAB/SYNPO2/MYL9/DES/FLNC	5
CC	GO:0031674	I band	5/54	134/19520	3.41e-05	0.000799098	0.000553581	CRYAB/SYNPO2/MYL9/DES/FLNC	5
CC	GO:0062023	collagen-containing extracellular matrix	5/54	423/19520	0.00617576	0.0380297	0.0263454	SPARCL1/MGP/MFAP4/OGN/PRELP	5
CC	GO:0032432	actin filament bundle	4/54	73/19520	4.94e-05	0.000963613	0.00066755	CRYAB/SYNPO2/MYL9/MYLK	4
CC	GO:0005796	Golgi lumen	4/54	102/19520	0.000181832	0.00303919	0.00210542	OGN/PRELP/MUC5AC/MUC6	4
CC	GO:0001725	stress fiber	3/54	64/19520	0.000740003	0.00901741	0.00624688	SYNPO2/MYL9/MYLK	3
CC	GO:0097517	contractile actin filament bundle	3/54	64/19520	0.000740003	0.00901741	0.00624688	SYNPO2/MYL9/MYLK	3
CC	GO:0042641	actomyosin	3/54	74/19520	0.00112912	0.0101621	0.00703986	SYNPO2/MYL9/MYLK	3
CC	GO:0042383	sarcolemma	3/54	134/19520	0.00607783	0.0380297	0.0263454	DES/FLNC/SYNM	3
CC	GO:0005875	microtubule associated complex	3/54	161/19520	0.0100433	0.0587532	0.0407017	BIRC5/ACTA2/ACTG2	3
CC	GO:0005859	muscle myosin complex	2/54	15/19520	0.000770719	0.00901741	0.00624688	MYH11/MYL9	2
CC	GO:0005869	dynactin complex	2/54	16/19520	0.000879261	0.00935214	0.00647876	ACTA2/ACTG2	2
CC	GO:0043034	costamere	2/54	18/19520	0.00111709	0.0101621	0.00703986	FLNC/SYNM	2
CC	GO:0016460	myosin II complex	2/54	19/19520	0.0012463	0.0104155	0.00721543	MYH11/MYL9	2
CC	GO:0005865	striated muscle thin filament	2/54	22/19520	0.00167467	0.0122461	0.00848355	TPM2/LMOD1	2
CC	GO:0032982	myosin filament	2/54	22/19520	0.00167467	0.0122461	0.00848355	MYH11/ACTG2	2
CC	GO:0036379	myofilament	2/54	26/19520	0.00233951	0.0161014	0.0111543	TPM2/LMOD1	2
CC	GO:0016459	myosin complex	2/54	57/19520	0.0108772	0.0606014	0.041982	MYH11/MYL9	2
MF	GO:0003779	actin binding	8/51	439/18337	2.61e-05	0.000862685	0.000678774	TPM2/LMOD1/SYNPO2/MYH11/TAGLN/CNN1/MYLK/FLNC	8
MF	GO:0005201	extracellular matrix structural constituent	6/51	170/18337	7.41e-06	0.000366766	0.000288577	MGP/MFAP4/OGN/PRELP/MUC5AC/MUC6	6
MF	GO:0008307	structural constituent of muscle	4/51	42/18337	5.49e-06	0.000366766	0.000288577	TPM2/MYH11/MYL9/SYNM	4
MF	GO:0030021	extracellular matrix structural constituent conferring compression resistance	2/51	22/18337	0.00169066	0.0334026	0.0262817	OGN/PRELP	2
MF	GO:0005212	structural constituent of eye lens	2/51	23/18337	0.00184839	0.0334026	0.0262817	CRYAB/HSPB6	2
MF	GO:0004190	aspartic-type endopeptidase activity	2/51	25/18337	0.002184	0.0334026	0.0262817	PGC/CTSE	2
MF	GO:0070001	aspartic-type peptidase activity	2/51	26/18337	0.0023618	0.0334026	0.0262817	PGC/CTSE	2
KEGG
	ID	Description	GeneRatio	BgRatio	pvalue	p.adjust	qvalue	geneID	Count
	hsa04270	Vascular smooth muscle contraction	44707	134/8112	5.67991e-05	0.00312395	0.00292964	59/4629/72/10398/4638	5
