# Supplementary material for: Prognostic value of RNA methylation-related genes in gastric adenocarcinoma based on bioinformatics
Source: PeerJ. 2024 Feb 29;12:e16951. doi: 10.7717/peerj.16951 (PMC10909369; doi:10.7717/peerj.16951)
Supplement: Supplemental Information 15 [file peerj-12-16951-s015.xlsx]

## Sheet: Supplementary Table 4
id	V2
32	DMOG	1.61e-20
54	LFM.A13	8.73e-20
13	BIBW2992	1.06e-17
31	Dasatinib	3.63e-17
47	Imatinib	5.12e-17
1	A.443654	1.91e-15
49	JNJ.26854165	4.43e-15
5	AG.014699	8.41e-15
25	BX.795	9.04e-15
8	AMG.706	5.58e-11
2	A.770041	8.06e-11
12	Bexarotene	9.93e-09
16	BIRB.0796	1.39e-08
46	GW843682X	2.74e-08
38	Epothilone.B	7.18e-08
3	ABT.263	1.34e-07
21	BMS.754807	1.83e-07
42	FTI.277	2.63e-06
30	Cytarabine	2.05e-05
40	Etoposide	3.65e-05
15	BI.D1870	7.11e-05
11	Axitinib	7.98e-05
45	GNF.2	0.000114905
56	Methotrexate	0.000210432
24	Bryostatin.1	0.000351675
55	Metformin	0.000361678
6	AICAR	0.0038887
4	ABT.888	0.00600561
19	BMS.536924	0.00610728
7	AKT.inhibitor.VIII	0.00709444
36	Elesclomol	0.0081338
10	AUY922	0.00901275
39	Erlotinib	0.0112629
23	Bosutinib	0.0121168
33	Docetaxel	0.0143605
44	Gemcitabine	0.0178292
20	BMS.708163	0.021174
41	FH535	0.0275344
26	Camptothecin	0.0413101
