# Supplementary material for: Prognostic value of RNA methylation-related genes in gastric adenocarcinoma based on bioinformatics
Source: PeerJ. 2024 Feb 29;12:e16951. doi: 10.7717/peerj.16951 (PMC10909369; doi:10.7717/peerj.16951)
Supplement: Supplemental Information 16 [file peerj-12-16951-s016.xlsx]

## Sheet: Sheet1
GO
ONTOLOGY	ID	Description	setSize	enrichmentScore	NES	pvalue	p.adjust	qvalues	rank	leading_edge	core_enrichment
BP	GO:0000070	mitotic sister chromatid segregation	155	-0.707475	-2.83049	1e-10	3.5039e-09	2.09342e-09	1210	tags=41%, list=6%, signal=39%	SEH1L/SPDL1/NCAPH2/NAA50/NAA10/KNTC1/CENPK/MAD2L1BP/RAD21/SMC1A/TUBG1/FBXO5/BUB3/RAN/DSN1/RRS1/NCAPD3/KIF14/CHMP4C/INCENP/KIF22/NCAPD2/DSCC1/SMC4/KNSTRN/SMC2/NDC80/CENPE/PSRC1/NCAPG2/KIF18A/ESPL1/KIF23/TACC3/NUF2/TTK/RACGAP1/BUB1B/KIF18B/DLGAP5/KIFC1/NUSAP1/PRC1/SPAG5/TRIP13/NCAPG/KIF4A/CENPF/CDC6/ZWINT/AURKB/PTTG1/BUB1/NCAPH/PLK1/MAD2L1/NEK2/CDCA8/KIF2C/CCNB1/CDT1/CDCA5/UBE2C/CDC20
BP	GO:0000075	cell cycle checkpoint	198	-0.615278	-2.4944	1e-10	3.5039e-09	2.09342e-09	2938	tags=44%, list=15%, signal=38%	USP28/CNOT3/RHNO1/RAD9A/PRCC/CDC5L/XRCC3/MDC1/NBN/PIDD1/CDK5RAP3/HMGA2/NABP2/CCAR2/CARM1/CNOT10/CASP2/RINT1/CUL4A/TRIAP1/PRMT1/PRPF19/ZW10/NAE1/CDK2/DOT1L/E2F4/INTS7/GEN1/DCLRE1B/SPDL1/BCL2L1/CCND1/KNTC1/TIPIN/MUC1/BRCC3/PRKDC/WDR76/BRIP1/DONSON/MAD2L1BP/CNOT11/BLM/TOPBP1/NSUN2/RFWD3/MSH2/BUB3/BRCA1/DNA2/EME1/PROX1/ZWILCH/CHEK2/TFDP1/CLSPN/FANCD2/E2F7/CHMP4C/CHEK1/TICRR/CDC25C/E2F8/TIMELESS/NDC80…
BP	GO:0000077	DNA damage checkpoint	138	-0.571908	-2.26584	1e-10	3.5039e-09	2.09342e-09	2938	tags=41%, list=15%, signal=35%	USP28/CNOT3/RHNO1/RAD9A/CDC5L/MDC1/NBN/PIDD1/CDK5RAP3/HMGA2/CCAR2/CARM1/CNOT10/CASP2/RINT1/CUL4A/TRIAP1/PRMT1/PRPF19/CDK2/DOT1L/E2F4/INTS7/CCND1/TIPIN/MUC1/BRCC3/PRKDC/WDR76/BRIP1/DONSON/CNOT11/BLM/TOPBP1/RFWD3/MSH2/BRCA1/EME1/CHEK2/TFDP1/CLSPN/FANCD2/E2F7/CHEK1/TICRR/CDC25C/E2F8/PCNA/GTSE1/DTL/SFN/E2F1/CDK1/PLK1/CCNB1/AURKA
BP	GO:0000086	G2/M transition of mitotic cell cycle	249	-0.49471	-2.06557	1e-10	3.5039e-09	2.09342e-09	3245	tags=45%, list=16%, signal=38%	PSMD7/PSMF1/PSMC1/PSMB6/RAB11A/PSMD1/NEDD1/HAUS8/HAUS1/PSMA6/PSMD8/PSMD5/MNAT1/PSMC3/PSMB10/PINX1/TUBA4A/NBN/PSME1/PPP2R2A/USH1C/DNM2/HAUS5/DBF4B/CEP78/KHDRBS1/YWHAG/CDK5RAP3/HMGA2/CENPJ/NABP2/CDK7/AJUBA/PSMD12/CDK4/PPME1/PSMC6/PSMB9/ODF2/PSMC2/PSMB2/PSMB4/TUBB/PSMD13/PSMB1/RINT1/PSMA7/HAUS6/NAE1/PSMD11/CDK2/PSMC4/CEP131/PSME3/PSMB7/PSMB3/PSMA4/PSMA5/PSMA3/PSMB5/CCND1/SSNA1/PSMD2/MASTL/HSP90AA1/Y…
CC	GO:0000228	nuclear chromosome	216	-0.656449	-2.67565	1e-10	3.5039e-09	2.09342e-09	2735	tags=44%, list=14%, signal=39%	ING2/RAD9A/CDC5L/TRRAP/MCRS1/PINX1/CHMP1A/SMC3/CSNK2A1/HMGA2/HNRNPU/CCNB1IP1/NUFIP1/SMARCB1/LRWD1/POLA1/CHRAC1/CDX2/DHX9/BRMS1/EXOSC9/PRPF19/P3H4/ACTR5/RSPH1/ORC5/HDAC2/PRIM2/HDAC1/TRIM24/TIPIN/UCHL5/POLE/RPA3/POLD3/CENPK/GINS3/BRCA2/BLM/TOP1/NIFK/TOPBP1/RUVBL1/RAD21/POLE3/SMC1A/PRIM1/TUBG1/NOL6/FIGNL1/RUVBL2/GINS4/BRCA1/REPIN1/POLA2/ANP32E/CENPO/ACTL6A/POLD1/SUV39H1/MCM5/POLE2/WDHD1/MCM6/DSN1/RR…
BP	GO:0000280	nuclear division	405	-0.557157	-2.42162	1e-10	3.5039e-09	2.09342e-09	3184	tags=39%, list=16%, signal=33%	NME6/SLC2A8/RAB11A/MAD2L2/PDXP/CHMP5/RPL24/CHMP2B/KATNB1/GPR3/LRP5/KIF2A/BAG6/RAD54B/CDC23/ING2/XRCC3/PINX1/CHAMP1/CHMP1A/SMC3/NUP62/LIF/PPP2R2A/NUDC/ANAPC1/ANAPC11/HNRNPU/PDS5A/AAAS/MTBP/PSMC3IP/CCNB1IP1/SPIRE2/CCSAP/TOM1L1/KPNB1/MISP/PSMD13/BANF1/CALR/DRG1/AURKAIP1/P3H4/ZW10/HOXA13/GEN1/CCNE2/PHB2/MAPK15/SEH1L/SPDL1/NCAPH2/RMI1/NAA50/NAA10/KNTC1/CENPK/BRIP1/BRCA2/MAD2L1BP/SMPD3/CEP85/PRMT5/RAD2…
CC	GO:0000313	organellar ribosome	85	-0.738383	-2.67441	1e-10	3.5039e-09	2.09342e-09	4004	tags=79%, list=20%, signal=63%	MRPL55/MRPL42/NDUFA7/MRPL28/MRPL20/CHCHD1/MRPL40/MRPS31/MRPS24/MRPS27/MRPL27/MRPS18C/MPV17L2/MALSU1/MTG2/MRPL51/MRPL35/MRPL22/DAP3/MRPL32/MRPL24/MRPL57/MRPS16/MRPS33/MRPS7/NDUFAB1/MRPL30/MRPL52/MRPS30/MRPL9/MRPL41/MRPS10/MRPS15/MRPL21/MRPS22/MRPL45/MRPS18B/MRPS28/MRPL48/MRPL19/MRPL49/MRPS9/MRPS18A/MRPL17/MRPL16/MRPL36/MRPL50/MRPS35/MRPL39/MRPL18/MRPL11/MRPL44/MRPS34/MRPL23/MRPS12/MRPS5/MRPL47/MRP…
CC	GO:0000315	organellar large ribosomal subunit	55	-0.740852	-2.45005	1e-10	3.5039e-09	2.09342e-09	4004	tags=80%, list=20%, signal=64%	MRPL55/MRPL42/MRPL28/MRPL20/MRPL40/MRPL27/MPV17L2/MALSU1/MRPL51/MRPL35/MRPL22/MRPL32/MRPL24/MRPL57/NDUFAB1/MRPL30/MRPL52/MRPS30/MRPL9/MRPL41/MRPL21/MRPL45/MRPL48/MRPL19/MRPL49/MRPS18A/MRPL17/MRPL16/MRPL36/MRPL50/MRPL39/MRPL18/MRPL11/MRPL44/MRPL23/MRPL47/MRPL37/MRPL2/MRPL4/MRPL15/MRPL3/MRPL13/MRPL14/MRPL12
BP	GO:0000375	RNA splicing, via transesterification reactions	346	-0.548684	-2.4071	1e-10	3.5039e-09	2.09342e-09	4495	tags=55%, list=23%, signal=43%	FXR1/TRA2A/RBM8A/POLR2A/HNRNPH2/RBMX2/SNRPB2/POLR2C/CTNNBL1/FUS/ISY1/DDX39B/SMN1/SNRNP70/MFAP1/POLR2K/HNRNPH1/AQR/GPKOW/PLRG1/CRNKL1/RBM15B/CCAR1/CWF19L1/PRPF38A/METTL3/LSM1/SMU1/CPSF2/DDX20/PQBP1/ELAVL1/PCBP2/DCPS/SF3A3/RBM39/GEMIN5/POLR2I/SF1/CPSF7/RBM17/PRPF31/RAVER2/SART1/LSM8/FMR1/SRSF10/PCBP1/HSPA8/BUD31/GEMIN6/SNW1/POLR2G/DHX16/PRDX6/MPHOSPH10/SART3/DDX41/MAGOHB/PABPN1/PAPOLA/TRA2B/DBR1/CL…
BP	GO:0000377	RNA splicing, via transesterification reactions with bulged adenosine as nucleophile	343	-0.54606	-2.38998	1e-10	3.5039e-09	2.09342e-09	4495	tags=60%, list=23%, signal=47%	ZCCHC8/RNF113A/PCBP4/GTF2F1/SF3A1/PRMT7/RBM22/SUGP1/AAR2/SNUPN/SRRM1/SYMPK/DHX38/TFIP11/HNRNPUL1/BCAS2/PRPF3/PRPF39/RBM19/FXR1/TRA2A/RBM8A/POLR2A/HNRNPH2/RBMX2/SNRPB2/POLR2C/CTNNBL1/FUS/ISY1/DDX39B/SMN1/SNRNP70/MFAP1/POLR2K/HNRNPH1/AQR/GPKOW/PLRG1/CRNKL1/RBM15B/CCAR1/CWF19L1/PRPF38A/METTL3/SMU1/CPSF2/DDX20/PQBP1/ELAVL1/PCBP2/DCPS/SF3A3/RBM39/GEMIN5/POLR2I/SF1/CPSF7/RBM17/PRPF31/RAVER2/SART1/LSM8/…
BP	GO:0000398	mRNA splicing, via spliceosome	343	-0.54606	-2.38998	1e-10	3.5039e-09	2.09342e-09	4495	tags=60%, list=23%, signal=47%	ZCCHC8/RNF113A/PCBP4/GTF2F1/SF3A1/PRMT7/RBM22/SUGP1/AAR2/SNUPN/SRRM1/SYMPK/DHX38/TFIP11/HNRNPUL1/BCAS2/PRPF3/PRPF39/RBM19/FXR1/TRA2A/RBM8A/POLR2A/HNRNPH2/RBMX2/SNRPB2/POLR2C/CTNNBL1/FUS/ISY1/DDX39B/SMN1/SNRNP70/MFAP1/POLR2K/HNRNPH1/AQR/GPKOW/PLRG1/CRNKL1/RBM15B/CCAR1/CWF19L1/PRPF38A/METTL3/SMU1/CPSF2/DDX20/PQBP1/ELAVL1/PCBP2/DCPS/SF3A3/RBM39/GEMIN5/POLR2I/SF1/CPSF7/RBM17/PRPF31/RAVER2/SART1/LSM8/…
CC	GO:0000502	proteasome complex	61	-0.721178	-2.43755	1e-10	3.5039e-09	2.09342e-09	3456	tags=72%, list=18%, signal=60%	UBQLN1/PSMD10/PSMD7/PSMF1/PSMC1/PSMB6/PSMD1/PSMA6/UBE3C/PSMD8/PSMD5/PSMC3/PSMB10/PSME1/RAD23A/RAD23B/VCP/PSMD12/PSMC6/USP14/PSMB9/PSMC2/PSMB2/PSMB4/PSMD13/PSMB1/PSMA7/PSMD11/PSMC4/PSME3/PSMB7/PSMB3/PSMA4/PSMA5/PSMA3/PSMB5/ADRM1/PSMD2/UCHL5/UBQLN4/PSMB8/PSMD14/PSMD3/PSME2
BP	GO:0000723	telomere maintenance	141	-0.653938	-2.56207	1e-10	3.5039e-09	2.09342e-09	2657	tags=47%, list=13%, signal=41%	XRCC3/PINX1/TELO2/TPRKB/NBN/XRCC5/SMG5/WRAP53/NABP2/HNRNPU/POLA1/HNRNPC/APEX1/HNRNPD/NHP2/HNRNPA1/PIF1/XRCC6/PARP1/MYC/CCNE2/DCLRE1B/MAPK15/PRIM2/PTGES3/HNRNPA2B1/HSP90AA1/PRKDC/POLE/RPA3/POLD3/DCLRE1A/BRCA2/BLM/CCT4/POLE3/PRIM1/NAT10/CCT2/RFC5/GAR1/TCP1/CCT7/POLA2/CCT3/POLD1/DNA2/RFC2/POLE2/CCT8/CCT5/HSP90AB1/CCT6A/GNL3/RFC4/POLD2/RAD51/EXO1/DKC1/RFC3/PCNA/FEN1/CCNE1/AURKB/NEK2/RECQL4
BP	GO:0000724	double-strand break repair via homologous recombination	128	-0.620491	-2.4247	1e-10	3.5039e-09	2.09342e-09	3496	tags=45%, list=18%, signal=37%	SIRT6/FANCM/WRN/LIG3/MAD2L2/RNF138/MMS22L/RAD54B/UBE2N/XRCC3/NBN/PALB2/SFPQ/MAGEF1/WRAP53/NABP2/PPP4R2/FANCB/PPP4C/KDM1A/RBBP8/PARP1/GEN1/MCM8/RMI1/RPA3/UBQLN4/BRCA2/BLM/PSMD14/RAD21/RFWD3/FIGNL1/GINS4/BRCA1/MCM5/CDC7/RMI2/MCM6/PARPBP/POLQ/CHEK1/XRCC2/AUNIP/RAD51/TIMELESS/MCM3/RAD51AP1/FEN1/RAD54L/TONSL/MCM7/GINS2/MCM4/CDC45/MCM2/RECQL4
BP	GO:0000725	recombinational repair	129	-0.621991	-2.43077	1e-10	3.5039e-09	2.09342e-09	3496	tags=45%, list=18%, signal=37%	SIRT6/FANCM/WRN/LIG3/MAD2L2/RNF138/MMS22L/RHNO1/RAD54B/UBE2N/XRCC3/NBN/PALB2/SFPQ/MAGEF1/WRAP53/NABP2/PPP4R2/FANCB/PPP4C/KDM1A/RBBP8/PARP1/GEN1/MCM8/RMI1/RPA3/UBQLN4/BRCA2/BLM/PSMD14/RAD21/RFWD3/FIGNL1/GINS4/BRCA1/MCM5/CDC7/RMI2/MCM6/PARPBP/POLQ/CHEK1/XRCC2/AUNIP/RAD51/TIMELESS/MCM3/RAD51AP1/FEN1/RAD54L/TONSL/MCM7/GINS2/MCM4/CDC45/MCM2/RECQL4
CC	GO:0000775	chromosome, centromeric region	182	-0.672395	-2.74857	1e-10	3.5039e-09	2.09342e-09	2640	tags=48%, list=13%, signal=42%	PINX1/CHAMP1/SMC3/NUP98/AHCTF1/NGDN/SEC13/NUP160/HNRNPU/DAXX/PDS5A/NUP107/NUP43/PHF6/ITGB3BP/MTBP/LRWD1/HSF1/ZW10/NUP85/XPO1/SEH1L/CENPL/SPDL1/KNTC1/SUV39H2/CENPV/CENPK/CENPQ/RCC2/CENPI/RAD21/SMC1A/CBX3/RANGAP1/CKAP5/HELLS/BUB3/NUP37/CENPO/SUV39H1/ZWILCH/ERCC6L/ESCO2/SPC24/DSN1/NCAPD3/CENPN/INCENP/KIF22/CENPH/NCAPD2/DSCC1/SMC4/KNSTRN/CENPW/CENPU/NDC80/CENPE/MIS18A/OIP5/KIF18A/SKA1/NUF2/TTK/SPC25/…
CC	GO:0000776	kinetochore	127	-0.682916	-2.6826	1e-10	3.5039e-09	2.09342e-09	2640	tags=51%, list=13%, signal=45%	PINX1/CHAMP1/NUP98/AHCTF1/SEC13/NUP160/HNRNPU/NUP107/NUP43/PHF6/ITGB3BP/MTBP/LRWD1/HSF1/ZW10/NUP85/XPO1/SEH1L/SPDL1/KNTC1/CENPV/CENPK/CENPQ/CENPI/SMC1A/RANGAP1/CKAP5/BUB3/NUP37/CENPO/ZWILCH/ERCC6L/SPC24/DSN1/CENPN/INCENP/KIF22/CENPH/KNSTRN/CENPW/CENPU/NDC80/CENPE/KIF18A/SKA1/NUF2/TTK/SPC25/BUB1B/CENPM/HJURP/SPAG5/CENPA/CENPF/ZWINT/AURKB/SKA3/BUB1/PLK1/MAD2L1/NEK2/KIF2C/CCNB1/CDT1/BIRC5
CC	GO:0000777	condensed chromosome kinetochore	96	-0.722631	-2.62589	1e-10	3.5039e-09	2.09342e-09	2640	tags=56%, list=13%, signal=49%	PINX1/CHAMP1/AHCTF1/HNRNPU/NUP107/NUP43/PHF6/ITGB3BP/LRWD1/HSF1/ZW10/NUP85/SEH1L/SPDL1/KNTC1/CENPV/CENPK/SMC1A/RANGAP1/CKAP5/BUB3/NUP37/CENPO/ZWILCH/ERCC6L/SPC24/DSN1/CENPN/INCENP/CENPH/KNSTRN/CENPW/CENPU/NDC80/CENPE/SKA1/NUF2/SPC25/BUB1B/CENPM/HJURP/SPAG5/CENPA/CENPF/ZWINT/SKA3/BUB1/PLK1/MAD2L1/NEK2/KIF2C/CCNB1/CDT1/BIRC5
CC	GO:0000779	condensed chromosome, centromeric region	105	-0.728829	-2.72383	1e-10	3.5039e-09	2.09342e-09	2259	tags=56%, list=11%, signal=50%	PINX1/CHAMP1/AHCTF1/HNRNPU/NUP107/NUP43/PHF6/ITGB3BP/LRWD1/HSF1/ZW10/NUP85/SEH1L/SPDL1/KNTC1/CENPV/CENPK/SMC1A/CBX3/RANGAP1/CKAP5/BUB3/NUP37/CENPO/ZWILCH/ERCC6L/SPC24/DSN1/NCAPD3/CENPN/INCENP/CENPH/NCAPD2/KNSTRN/CENPW/CENPU/NDC80/CENPE/SKA1/NUF2/SPC25/BUB1B/CENPM/HJURP/SPAG5/NCAPG/CENPA/CENPF/ZWINT/AURKB/SKA3/BUB1/PLK1/MAD2L1/NEK2/KIF2C/CCNB1/CDT1/BIRC5
CC	GO:0000781	chromosome, telomeric region	130	-0.597895	-2.34674	1e-10	3.5039e-09	2.09342e-09	4297	tags=53%, list=22%, signal=42%	RPA1/PPP1R10/THOC7/CDC73/ORC4/UPF1/RPA2/RIF1/PPP1CC/ORC2/SIRT6/WRN/DPY30/ACD/DDB1/THOC2/POLR2B/XRCC3/PINX1/NBN/NLRP2/XRCC5/WRAP53/NABP2/LRWD1/THOC6/APEX1/NHP2/HAT1/SSB/KDM1A/PIF1/DOT1L/XRCC6/PARP1/WRNIP1/ORC5/DCLRE1B/THOC3/PTGES3/HNRNPA2B1/PRKDC/BRCA2/BLM/PPP1CA/NAT10/GAR1/CBX3/MSH2/MEN1/POLD1/DNA2/MCM5/CHEK2/MCM6/CHEK1/ALYREF/RAD51/MCM3/EZH2/PCNA/RAD51AP1/FEN1/MCM7/ORC1/MCM4/MCM2/CDK1/RECQL4
CC	GO:0000793	condensed chromosome	194	-0.66659	-2.72047	1e-10	3.5039e-09	2.09342e-09	2795	tags=46%, list=14%, signal=40%	SKA2/RAD9A/PINX1/CHAMP1/CHMP1A/SMC3/AHCTF1/HNRNPU/NUP107/NUP43/PHF6/ITGB3BP/CCNB1IP1/LRWD1/CDX2/HSF1/BANF1/P3H4/ZW10/NUP85/RSPH1/HMGB1/SEH1L/SPDL1/NCAPH2/KNTC1/CENPV/CENPK/BRCA2/BLM/NIFK/TOPBP1/RAD21/SMC1A/TUBG1/NOL6/CBX3/RANGAP1/CKAP5/BUB3/NUP37/BRCA1/CENPO/SUV39H1/ZWILCH/ERCC6L/SPC24/DSN1/FANCD2/RRS1/NCAPD3/LRPPRC/CHEK1/HMGB2/CENPN/INCENP/CENPH/NCAPD2/KNSTRN/CENPW/SMC2/RAD51/CENPU/NDC80/CENPE/S…
BP	GO:0000819	sister chromatid segregation	181	-0.693696	-2.83876	1e-10	3.5039e-09	2.09342e-09	2657	tags=50%, list=13%, signal=43%	XRCC3/PINX1/CHAMP1/MCMBP/CHMP1A/SMC3/NUP62/AXIN2/ESCO1/SFPQ/NUDC/CTNNB1/ANAPC1/ANAPC11/HNRNPU/PDS5A/KPNB1/ZW10/GEN1/PHB2/MAPK15/SEH1L/SPDL1/NCAPH2/DDX11/NAA50/NAA10/KNTC1/CENPK/MAD2L1BP/RAD21/SMC1A/TUBG1/FBXO5/BUB3/RAN/RMI2/ESCO2/DSN1/RRS1/NCAPD3/KIF14/CHMP4C/INCENP/KIF22/NCAPD2/DSCC1/SMC4/KNSTRN/SMC2/NDC80/CENPE/PSRC1/NCAPG2/KIF18A/ESPL1/KIF23/FEN1/TACC3/NUF2/TTK/RACGAP1/BUB1B/KIF18B/DLGAP5/KIFC…
BP	GO:0001501	skeletal system development	466	0.580281	1.89831	1e-10	3.5039e-09	2.09342e-09	2625	tags=32%, list=13%, signal=28%	MGP/SFRP2/PRELP/CHRDL2/SFRP4/GREM1/SFRP1/EFEMP1/HAND2/FRZB/LUM/TMEM119/FBN1/MMP2/BGN/COL3A1/MYOC/ROR2/FGFR1/CDH11/COMP/SULF1/RASSF2/KIT/ANXA6/EVC/COL10A1/VCAN/LTF/IGF2/MEF2C/PRRX1/PDGFRA/SIX2/LTBP3/COL1A2/TGFB3/DCHS1/MAF/TEK/HOXA4/GJA1/GLI3/ZBTB16/TIMP1/FGF2/MEIS1/TGFB1/RAB23/LRRC17/FAT4/TGFBR2/PBX1/ENG/WNT9A/COL1A1/FOXN3/PTPRC/GLI2/EDN1/TGFBI/SH3PXD2B/HOXA5/GHRL/FLI1/NPR2/WNT2B/NKX3-2/GPR68/COL5…
BP	GO:0001503	ossification	371	0.58771	1.91628	1e-10	3.5039e-09	2.09342e-09	2625	tags=35%, list=13%, signal=31%	MGP/SFRP2/CHRDL2/GREM1/CHRDL1/SFRP1/HAND2/IGFBP5/ASPN/DDR2/OMD/FERMT2/TMEM119/PTN/TNC/MMP2/S1PR1/WWTR1/CLEC3B/MN1/MYOC/ROR2/SLC24A3/CDH11/COMP/RASSF2/TWIST2/VCAN/LTF/IGF2/MEF2C/GPC3/PDLIM7/SIX2/LTBP3/COL1A2/TGFB3/MRC2/DCHS1/TEK/SPARC/CLEC11A/GLI1/CTHRC1/GLI3/ZBTB16/VEGFC/IL6ST/TGFB1/FAT4/PBX1/COL1A1/EGR2/COL6A1/SMO/ITGA11/GLI2/SRGN/PRKD1/NPR2/FSTL3/COL5A2/IGFBP3/BMP6/SNAI2/LEF1/IGF1/LOX/ECM1/FZD1…
BP	GO:0001525	angiogenesis	479	0.629881	2.0613	1e-10	3.5039e-09	2.09342e-09	2299	tags=39%, list=12%, signal=36%	HSPB6/APOD/SFRP2/THBS4/GREM1/PTGIS/SMOC2/SFRP1/CALD1/CYP1B1/DCN/FLNA/RSPO3/HAND2/COL8A1/ANGPTL1/SERPINF1/THBS1/EMILIN1/NGFR/CLDN5/PTN/JAM3/ADAMTS1/MMP2/S1PR1/ANGPTL2/CAV1/ISM1/C3/THBS2/SLIT2/AKT3/RAMP2/RAMP1/AQP1/MEOX2/COL8A2/SULF1/CCL11/ATP2B4/EDNRA/CLIC4/MMRN2/AMOTL1/RHOJ/RAMP3/FN1/TMEM100/APLNR/CLEC14A/PRKCB/PDGFRB/MCAM/PDGFRA/COL15A1/GPNMB/CCL2/NRP2/ENPP2/PTPRM/CSPG4/CXCR4/TNFSF12/NPR1/THY1/R…
BP	GO:0001655	urogenital system development	319	0.555689	1.79602	1e-10	3.5039e-09	2.09342e-09	2583	tags=31%, list=13%, signal=28%	GREM1/ACTA2/SFRP1/DCN/SERPINF1/FOXF1/MYOCD/FBN1/ADAMTS1/TNC/KANK2/TNS2/HEYL/WWTR1/SLIT2/ITGA8/SULF1/PECAM1/KCNJ8/BICC1/PDGFRB/MEF2C/PDGFRA/GPC3/SIX2/AGT/BASP1/PKD2/DCHS1/NID1/TEK/TCF21/CD34/GLI1/FGF10/GLI3/ZBTB16/GLIS2/FGF2/EPHA7/PDGFD/EGR1/FAT4/NFIA/PBX1/CYP7B1/CRLF1/SOX17/SMO/GLI2/COL4A4/HPGD/AGTR1/WNT2B/FSTL3/BMP6/PKD1/LRRK2/RBP4/RARB/PYGO1/PTCH1/BCL2/MTSS1/LAMB2/ARID5B/SPRY1/VANGL2/FOXC2/EPHA…
BP	GO:0001667	ameboidal-type cell migration	395	0.552593	1.80304	1e-10	3.5039e-09	2.09342e-09	2644	tags=36%, list=13%, signal=32%	GREM1/SMOC2/CYP1B1/DCN/HAND2/AKAP12/DDR2/SERPINF1/FGF7/THBS1/PTN/KANK2/FSTL1/SLIT2/FGFR1/AKT3/MEOX2/ATP2B4/KIT/ANXA6/MMRN2/AMOTL1/RHOJ/FN1/CLEC14A/MEF2C/GPC3/NRP2/ENPP2/PTPRM/AGT/SYDE1/TNFSF12/RHOB/TEK/SPARC/SRPX2/GJA1/MCC/FGF10/ZEB2/TIMP1/ROBO1/FGF2/VEGFC/ISL1/CXCL13/CDH5/TGFB1/SEMA3G/TGFBR2/EVL/SCG2/SEMA3C/EDNRB/GLIPR2/EGR3/NR2F2/SOX17/SMO/EDN1/RRAS/SOX18/FAP/PRKD1/ETS1/SEMA6A/MAP3K3/ACVRL1/NRP…
BP	GO:0002250	adaptive immune response	400	0.5363	1.74908	1e-10	3.5039e-09	2.09342e-09	3843	tags=40%, list=19%, signal=33%	C7/CCL19/CLU/IL33/C1S/SERPING1/C1R/JAM3/CD79A/C3/IL1R1/CR2/RFTN1/PRKCB/MEF2C/GPR183/C4A/C4B/CD79B/IGLL5/CD1C/IL6ST/CXCL13/TGFB1/CD48/CLEC10A/GAPT/PTPRC/CD27/HLA-DQA1/SASH3/IL7R/HLA-DPB1/LEF1/FCER2/SLAMF6/FYN/CFI/WAS/TLR4/HLA-DPA1/PIK3CG/HLA-DOA/CD19/BTK/CD4/SPN/RORA/PIK3CD/CD84/BCL6/CD3E/TNFRSF13C/CD1D/JAK3/SWAP70/SIT1/CD3D/C1RL/HLA-DQA2/C1QA/KLHL6/GZMM/TNFSF13B/GATA3/LAX1/CD28/C1QC/CD1E/CD40LG/T…
BP	GO:0002685	regulation of leukocyte migration	197	0.611392	1.92704	1e-10	3.5039e-09	2.09342e-09	3195	tags=44%, list=16%, signal=37%	APOD/THBS4/CCL19/GREM1/CCL21/IL33/SELP/THBS1/EMILIN1/JAM2/PTN/CXCL12/JAM3/IL1R1/SLIT2/DUSP1/RARRES2/CCL2/CCR7/THY1/CXCL14/MSN/VEGFC/PDGFD/CXCL13/IL34/CD200/CSF1R/SERPINE1/CAMK1D/GAS6/EDN1/PLVAP/MMP28/TREM2/CX3CR1/AIF1/ECM1/NCKAP1L/CD99L2/ST3GAL4/C3AR1/MADCAM1/C5AR1/CX3CL1/SELE/SPN/CXCL17/RIN3/GPSM3/DOCK8/BST1/PTGER4/VEGFB/STAP1/ITGA4/SWAP70/CMKLR1/PTAFR/IL6R/RHOH/BDKRB1/CD74/CCR2/ANXA1/MPP1/STK10…
BP	GO:0002694	regulation of leukocyte activation	493	0.521895	1.70904	1e-10	3.5039e-09	2.09342e-09	3832	tags=43%, list=19%, signal=36%	CCL19/CCL21/SFRP1/IL33/THBS1/FOXF1/FGL2/LRRC32/CAV1/SYT11/AXL/IGF2/MEF2C/GPR183/GPNMB/CCL2/TOX/ITPKB/DTX1/CCR7/THY1/IGLL5/VCAM1/NR4A3/FGF10/GLI3/ZBTB16/IL6ST/TGFB1/CD200/LGALS1/TGFBR2/CD22/EGR3/PRNP/GAS6/PTPRC/CD27/GLI2/MILR1/CNR1/SASH3/IL7R/HLA-DPB1/BANK1/LEF1/TYROBP/TREM2/PLA2G10/LAPTM5/INHBA/BLK/IGF1/PJA2/AIF1/NCKAP1L/LRRK2/GPER1/FYN/TWSG1/MZB1/CX3CL1/ITGAM/CD5/TLR4/HLA-DPA1/BCL2/HLA-DOA/CD19/…
BP	GO:0003007	heart morphogenesis	228	0.60251	1.91548	1e-10	3.5039e-09	2.09342e-09	2589	tags=33%, list=13%, signal=29%	SFRP2/ELN/CPE/FLNA/HAND2/FOXF1/CLDN5/SLIT3/ADAMTS1/S1PR1/HEYL/SLIT2/HEG1/TMEM100/MEF2C/NRP2/TPM1/PKD2/DLC1/DCHS1/ACTC1/TEK/ROBO1/ISL1/TGFB1/COL5A1/FAT4/TGFBR2/ENG/TGFBR3/PARVA/SEMA3C/SOX17/SMO/ZFPM2/SOX18/SMARCD3/CITED2/OLFM1/ACVRL1/NRP1/SNAI2/FLRT2/GJA5/RBP4/TWIST1/RARB/PTCH1/HTR2B/SPRY1/VANGL2/FOXC2/TGFBR1/TBX2/BMPR2/GATA3/TGFB2/NOTCH2/ZMIZ1/MICAL2/NPY1R/PIM1/NOS3/PLXND1/HEY2/SMAD7/DHRS3/ACVR1/…
BP	GO:0003012	muscle system process	417	0.647155	2.11313	1e-10	3.5039e-09	2.09342e-09	2597	tags=33%, list=13%, signal=30%	DES/MYH11/HSPB6/ACTG2/CNN1/LMOD1/PLN/SYNM/MYL9/MYLK/ACTA2/SORBS1/CRYAB/CALD1/FLNA/HAND2/TPM2/IGFBP5/PPP1R12B/TACR2/PI16/KCNMA1/CASQ2/CACNA1H/SGCA/SSPN/MYOCD/GNAO1/CAV1/FBXO32/ATP1A2/MYOC/COMP/TMOD1/SULF1/KCNE4/ATP2B4/EDNRA/KIT/ANXA6/KCNJ8/RGS2/VIM/DMPK/SMTN/GSN/TPM1/CACNA2D1/AGT/CXCR4/DMD/ITGA1/ACTC1/PRKG1/ANK2/CLIC2/F2R/NR4A3/GJA1/PTGER3/CHRM2/CALCRL/CACNA1C/IL6ST/KCNH2/SMPX/UTRN/RGS4/CHRNA3/CHG…
BP	GO:0003015	heart process	275	0.606456	1.9474	1e-10	3.5039e-09	2.09342e-09	2492	tags=32%, list=13%, signal=29%	DES/PLN/HSPB7/FLNA/CASQ2/CACNA1H/GNAO1/FXYD6/CAV1/WWTR1/ABCC9/ATP1A2/POPDC2/SGCD/KCNE4/ATP2B4/KCNJ8/RGS2/RAMP3/DMPK/GSN/CELF2/TPM1/CACNA2D1/AGT/BVES/CXCR4/DMD/NPR1/ACTC1/ANK2/ATP1B2/CLIC2/GJA1/CHRM2/CACNA1C/ITPR1/ISL1/KCNH2/RGS4/CHGA/KCNK3/SCN4B/EDN1/KCND3/EHD3/GJC1/NPR2/CACNB2/EPAS1/PDE4B/TRPC1/FXYD1/MEF2A/GJA5/FYN/ATP2A3/SCN1B/AVPR1A/KCNA5/PIK3CG/SLC8A1/CACNG4/VEGFB/STC1/KCNE2/TAC1/TBX2/TGFB2/K…
MF	GO:0003735	structural constituent of ribosome	157	-0.647782	-2.59455	1e-10	3.5039e-09	2.09342e-09	4720	tags=71%, list=24%, signal=55%	RPS20/RPL31/RPS24/RPS29/RPS8/RPL3/MRPS11/RPL6/RPS28/RPL9/RPL30/MRPL46/RPS11/RPL36/RPS3A/RPS13/RPL4/RPS17/RPL35A/MRPL55/RPL32/RPL41/RSL24D1/MRPL42/NDUFA7/MRPL28/MRPL20/RPL38/RPS10/RPS12/RPS16/RPL23A/RPL18A/RPS26/MRPS31/MRPS24/RPS4X/MRPL27/RPS5/MRPS18C/RPL24/RPLP2/RPS6/MRPL51/RPL37A/MRPL35/RPL36A/MRPL22/RPL19/DAP3/MRPL32/MRPL24/RPL35/MRPL57/MRPS16/MRPS25/RPS15/MRPS33/MRPL1/MRPS7/RPL7/RPL14/RPS21/MR…
MF	GO:0003779	actin binding	424	0.557293	1.81998	1e-10	3.5039e-09	2.09342e-09	3379	tags=33%, list=17%, signal=28%	MYH11/CNN1/SYNPO2/LMOD1/TAGLN/FLNC/MYLK/TNS1/SORBS1/PDLIM3/CALD1/FLNA/TPM2/NEXN/KCNMA1/MAP1B/FERMT2/PALLD/SVIL/ANTXR1/SYNPO/DAAM2/MAP1A/FAM107A/CFL2/GAS7/TMOD1/CAP2/ANXA6/DIXDC1/LDB3/SMTN/PDLIM4/GSN/PDLIM7/TPM1/CXCR4/DMD/MSN/WIPF1/LSP1/SYNE1/UTRN/MYH10/PARVA/RDX/EVL/RCSD1/KLHL5/MYOM1/VCL/HCLS1/CACNB2/RAI14/TLN1/CNN3/ABLIM3/DST/FMNL3/AFAP1/PPP1R18/WASF3/AIF1/FHL3/PLEKHH2/NCALD/LRRK2/GMFG/DSTN/ACTN…
MF	GO:0004386	helicase activity	151	-0.570397	-2.2733	1e-10	3.5039e-09	2.09342e-09	3953	tags=48%, list=20%, signal=39%	UPF1/DQX1/DDX20/DDX51/SKIV2L/DDX27/FANCM/WRN/DHX16/ERCC2/G3BP1/DDX41/DDX52/ASCC3/DDX55/CHD1L/ZGRF1/DDX10/RAD54B/DHX33/DDX23/XRCC5/GTF2F2/DHX37/HELZ2/DHX30/DHX34/SNRNP200/MOV10/CHD7/DDX28/SUPV3L1/SMARCA4/DDX18/DDX49/DHX9/DDX1/PIF1/XRCC6/WRNIP1/DDX31/MCM8/DDX56/TTF2/DDX11/DDX54/DHX15/BRIP1/BLM/RUVBL1/EIF4A3/DDX21/RFC5/HELLS/RUVBL2/DNA2/MCM5/RFC2/MCM6/ERCC6L/DDX39A/POLQ/CHTF18/DSCC1/RFC4/RAD51/MCM3/…
MF	GO:0005178	integrin binding	134	0.70598	2.16392	1e-10	3.5039e-09	2.09342e-09	2760	tags=55%, list=14%, signal=48%	SFRP2/THBS4/FBLN5/THBS1/EMILIN1/TNXB/FERMT2/JAM2/PTN/CXCL12/JAM3/FBN1/TIMP2/COL3A1/S1PR3/COMP/ITGBL1/ADAMTS8/FN1/IGF2/GPNMB/ECM2/VWF/LTBP4/THY1/VCAM1/ITGA5/COL16A1/FGF2/EDIL3/COL5A1/UTRN/MFGE8/TGFBI/FAP/VTN/ICAM2/TLN1/DST/FCER2/IGF1/TSPAN4/TNN/ACTN1/MADCAM1/LCP1/ADAM23/CX3CL1/ITGAM/ITGB3/LAMB2/KDR/ITGA4/ACTN2/TSPAN8/CD40LG/ITGB2/ITGAX/ITGAV/LAMB1/ITGB1/EGFR/ICAM3/COL4A3/ITGB1BP2/NISCH/PTPRZ1/MMP1…
MF	GO:0005201	extracellular matrix structural constituent	167	0.835426	2.60976	1e-10	3.5039e-09	2.09342e-09	1674	tags=55%, list=8%, signal=51%	MGP/OGN/MFAP4/PRELP/SPON1/FBLN1/COL14A1/PODN/ELN/EFEMP1/DCN/ABI3BP/MFAP5/SRPX/ASPN/FBLN5/DPT/COL8A1/LTBP1/FBLN2/AEBP1/LUM/FMOD/THBS1/EMILIN1/TNXB/IGFBP7/CILP/FGL2/FBN1/LTBP2/TNC/LAMA2/THBS2/COL6A2/BGN/COL3A1/COMP/COL8A2/MMRN2/EFEMP2/FN1/MMRN1/COL10A1/VCAN/COL15A1/COL6A3/LAMA4/COL1A2/PCOLCE/MATN2/HMCN1/VWF/LTBP4/NID1/SPARC/CTHRC1/SRPX2/COL16A1/HSPG2/EDIL3/COL5A1/MFGE8/COL4A2/SBSPON/COL1A1/COL6A1/M…
MF	GO:0005539	glycosaminoglycan binding	215	0.692772	2.19929	1e-10	3.5039e-09	2.09342e-09	1659	tags=35%, list=8%, signal=32%	THBS4/PRELP/CCDC80/SMOC2/DPYSL3/SFRP1/SOD3/DCN/RSPO3/FGF7/GREM2/SELP/THBS1/TNXB/SLIT3/PTN/FBN1/ADAMTS1/LTBP2/CRISPLD2/FSTL1/THBS2/BGN/CLEC3B/SLIT2/FGFR1/CFH/COMP/SULF1/ANXA6/EFEMP2/ADAMTS8/FN1/VCAN/LTF/SERPINE2/GPNMB/NRP2/LAYN/PCOLCE/SELL/ECM2/LTBP4/SPOCK2/PTPRS/FGF10/MMP7/FGF2/CXCL13/COL5A1/TGFBR2/ENG/TGFBR3/CTSG/NDNF/LXN/POSTN/PRNP/LYVE1/PTPRC/STAB1/VTN/LPL/NRP1/TREM2/THBS3/RSPO2/REG4/PTCH1/EVA…
CC	GO:0005581	collagen trimer	87	0.762542	2.23732	1e-10	3.5039e-09	2.09342e-09	2418	tags=47%, list=12%, signal=42%	COL14A1/DCN/COL8A1/LUM/EMILIN1/SCARA3/COL6A2/COL3A1/COL8A2/COL10A1/COL15A1/COL6A3/COL1A2/COLEC12/C1QTNF7/CTHRC1/COL16A1/COL5A1/C1QTNF1/COL4A2/COL1A1/COL6A1/C1QTNF3/COL4A4/COL4A5/C1QTNF2/COL5A2/LOX/COL18A1/COL12A1/COL4A6/MSR1/COL4A1/C1QA/C1QL1/C1QC/ADIPOQ/FCN1/C1QB/COL4A3/COL21A1
CC	GO:0005604	basement membrane	92	0.738202	2.17481	1e-10	3.5039e-09	2.09342e-09	1674	tags=41%, list=8%, signal=38%	THBS4/CCDC80/SMOC2/COL8A1/SERPINF1/PTN/FBN1/ADAMTS1/NTN1/TNC/LAMA2/COL8A2/MMRN2/EFEMP2/FN1/COL15A1/LAMA4/HMCN1/NID1/SPARC/LOXL1/TIMP1/HSPG2/NTN4/COL5A1/COL4A2/COL4A4/COL4A5/TGFBI/P3H2/DST/COL18A1/HMCN2/LAMC1/COL4A6/NID2/LAMB2/COL4A1
CC	GO:0005681	spliceosomal complex	182	-0.602335	-2.46219	1e-10	3.5039e-09	2.09342e-09	5215	tags=66%, list=26%, signal=49%	PRPF38B/ZCCHC8/RNF113A/AKAP17A/SF3A1/RBM22/SUGP1/AAR2/SRRM1/DHX38/TFIP11/BCAS2/PRPF3/PRPF39/TRA2A/RBM8A/ADAR/RBMX2/SNRPB2/CTNNBL1/ISY1/DDX39B/SNRNP70/MFAP1/HNRNPH1/AQR/GPKOW/PLRG1/CRNKL1/CWF19L1/PRPF38A/SMU1/UPF1/DQX1/SF3A3/SF1/CCDC12/RBM17/PRPF31/SART1/LSM8/API5/HSPA8/BUD31/SNW1/DHX16/PPP1R8/DDX41/MAGOHB/RHEB/TRA2B/PNN/HNRNPA3/HNRNPK/LGALS3/BUD13/SMNDC1/HTATSF1/SNRNP48/CDC5L/SF3B2/DDX23/RBM28/RB…
CC	GO:0005743	mitochondrial inner membrane	428	-0.564195	-2.48505	1e-10	3.5039e-09	2.09342e-09	4667	tags=62%, list=24%, signal=48%	MTG1/ABCB7/MRPL38/SLC25A43/UQCRB/LDHD/SLC25A25/MRPS11/NDUFAF2/HADHA/NDUFB5/IMMP1L/NDUFV2/MTCH1/NDUFA2/MRPL46/ACAD9/TIMMDC1/SLC25A24/PARL/SMIM20/CLPX/ECSIT/COA3/CKMT1B/NDUFAF6/MRPL55/CHCHD6/DNAJC19/YME1L1/MRPL42/NDUFB10/NDUFA7/MRPL28/COX16/PISD/MRPL20/OXA1L/SLC25A37/UQCRC2/NDUFB11/NDUFS5/CPT2/CHCHD1/HCCS/MCU/MICU2/NDUFS1/COX18/UQCRQ/TTC19/NDUFS8/TIMM22/MRPL40/COX7B/SPHK2/COQ5/TMEM126A/MRPS31/C12or…
CC	GO:0005759	mitochondrial matrix	446	-0.569442	-2.50413	1e-10	3.5039e-09	2.09342e-09	4119	tags=55%, list=21%, signal=44%	CLPX/TRMT5/TP53/METTL15/PARK7/MRPL55/DNAJC19/ARG2/PDSS2/TEFM/NAGS/MRPL42/ACP6/NDUFA7/WARS2/MRPL28/MRPL20/MMAB/IDH3G/OXA1L/CHCHD1/ISCA2/NDUFS1/NDUFS8/MRPL40/NADK2/COQ5/GFM2/TRIT1/MRPS31/MRPS24/GADD45GIP1/NDUFS7/MRPS27/MRPL27/ELAC2/PDP1/MRPS18C/ACO2/ACSM3/LIAS/FDX1/PDK1/MPV17L2/DGUOK/HADH/MALSU1/MTG2/MRPL51/DHRS2/MCCC1/LACTB2/MRPL35/MRPL22/MTHFD2L/NDUFA10/PMPCB/PTCD1/GSTZ1/RPUSD4/PPA2/DAP3/MRPL32/E…
CC	GO:0005761	mitochondrial ribosome	85	-0.738383	-2.67441	1e-10	3.5039e-09	2.09342e-09	4004	tags=79%, list=20%, signal=63%	MRPL55/MRPL42/NDUFA7/MRPL28/MRPL20/CHCHD1/MRPL40/MRPS31/MRPS24/MRPS27/MRPL27/MRPS18C/MPV17L2/MALSU1/MTG2/MRPL51/MRPL35/MRPL22/DAP3/MRPL32/MRPL24/MRPL57/MRPS16/MRPS33/MRPS7/NDUFAB1/MRPL30/MRPL52/MRPS30/MRPL9/MRPL41/MRPS10/MRPS15/MRPL21/MRPS22/MRPL45/MRPS18B/MRPS28/MRPL48/MRPL19/MRPL49/MRPS9/MRPS18A/MRPL17/MRPL16/MRPL36/MRPL50/MRPS35/MRPL39/MRPL18/MRPL11/MRPL44/MRPS34/MRPL23/MRPS12/MRPS5/MRPL47/MRP…
CC	GO:0005762	mitochondrial large ribosomal subunit	55	-0.740852	-2.45005	1e-10	3.5039e-09	2.09342e-09	4004	tags=80%, list=20%, signal=64%	MRPL55/MRPL42/MRPL28/MRPL20/MRPL40/MRPL27/MPV17L2/MALSU1/MRPL51/MRPL35/MRPL22/MRPL32/MRPL24/MRPL57/NDUFAB1/MRPL30/MRPL52/MRPS30/MRPL9/MRPL41/MRPL21/MRPL45/MRPL48/MRPL19/MRPL49/MRPS18A/MRPL17/MRPL16/MRPL36/MRPL50/MRPL39/MRPL18/MRPL11/MRPL44/MRPL23/MRPL47/MRPL37/MRPL2/MRPL4/MRPL15/MRPL3/MRPL13/MRPL14/MRPL12
CC	GO:0005788	endoplasmic reticulum lumen	297	0.575665	1.85311	1e-10	3.5039e-09	2.09342e-09	2729	tags=34%, list=14%, signal=30%	SPARCL1/SPON1/COL14A1/CHRDL1/IGFBP5/CLU/COL8A1/LTBP1/IGFBP4/THBS1/CASQ2/MXRA8/IGFBP7/FBN1/TNC/FSTL1/C3/COL6A2/COL3A1/COL8A2/FN1/COL10A1/VCAN/GPC3/COL15A1/COL6A3/C4A/COL1A2/SDC2/CES1/FAM20C/PRSS23/TIMP1/GPX7/COL16A1/PDGFD/COL5A1/LGALS1/MFGE8/COL4A2/SCG2/COL1A1/COL6A1/BCHE/GAS6/COL4A4/COL4A5/EDN1/GHRL/P3H2/GPX8/FKBP7/CERCAM/FSTL3/COL5A2/IGFBP3/MATN3/ADAMTSL4/PDGFC/COL18A1/BACE1/RCN3/COL12A1/MZB1/LA…
CC	GO:0005819	spindle	360	-0.468268	-2.01579	1e-10	3.5039e-09	2.09342e-09	3134	tags=37%, list=16%, signal=31%	RAB11A/MAD2L2/NEDD1/HAUS8/TUBGCP4/HAUS1/ATAT1/CLTC/KATNB1/DIAPH1/KIF2A/SKA2/CTTN/PINX1/CHAMP1/PTP4A1/SMC3/TMEM9/NUP62/NUDC/HAUS5/PKP4/CTNNB1/HNRNPU/CCAR2/IQCB1/MAEA/POLB/MZT2B/AAAS/RAB11FIP4/CCSAP/TAF1D/ODF2/MISP/HSF1/PLEKHG6/HAUS6/CLTA/PRPF19/ZW10/RPS3/NUP85/RSPH1/MAPK15/MZT2A/SPDL1/DDX11/FAM110A/GPSM2/KNTC1/SPATA5L1/IL17RB/BRCC3/CENPV/RCC2/DCUN1D5/MAD2L1BP/HNF4G/RAE1/TOPBP1/TMEM201/NSUN2/CEP85/…
CC	GO:0005840	ribosome	215	-0.608624	-2.47441	1e-10	3.5039e-09	2.09342e-09	4720	tags=69%, list=24%, signal=53%	RPS24/RPS29/MTG1/RPS8/MRPL38/NUFIP2/RPL3/MRPS11/BTF3/RPL6/RPS6KL1/RPS28/RPL9/RPL30/MRPL46/RPS11/RPL36/RPS3A/RPS13/RPL4/RPS17/RPL35A/MRPL55/RPL32/RPL41/RSL24D1/MRPL42/NDUFA7/MRPL28/MRPL20/SF1/RPL38/RPS10/CHCHD1/RPS12/RPS16/MRPL40/SERP1/RPL23A/RRBP1/FMR1/RPL18A/RPS26/MRPS31/MRPS24/RPS4X/EIF2A/GADD45GIP1/MRPS27/LARP4B/MRPL27/RPS5/MRPS18C/EIF3H/RPL24/RPLP2/MPV17L2/RPS6/MALSU1/MTG2/MRPL51/RPL37A/MRPL3…
BP	GO:0006119	oxidative phosphorylation	110	-0.60572	-2.30081	1e-10	3.5039e-09	2.09342e-09	4012	tags=65%, list=20%, signal=52%	PARK7/TEFM/NDUFB10/NDUFA7/UQCRC2/NDUFB11/NDUFS5/NDUFS1/UQCRQ/NDUFS8/COX7B/COQ9/NDUFS7/SDHD/NDUFB2/NDUFB6/DGUOK/COX7A2L/NDUFC1/NDUFA12/COX10/NDUFB4/COX4I1/NDUFA10/FXN/COX15/PDE12/UQCC2/COX6B1/ABCD1/NDUFA1/NDUFA9/NDUFA8/NDUFAB1/VCP/GHITM/NDUFA6/DLD/UQCR10/NDUFS3/COX5B/NDUFB9/NDUFS2/COX6C/NDUFB3/COX8A/UQCRHL/UQCC3/COX7A2/DNAJC15/CHCHD2/NDUFV1/NDUFS6/SLC25A33/UQCRFS1/COX6A1/MLXIPL/BID/UQCRH/SDHA/COX5…
BP	GO:0006260	DNA replication	270	-0.607996	-2.54529	1e-10	3.5039e-09	2.09342e-09	2612	tags=46%, list=13%, signal=40%	DDX23/MCMBP/SMC3/NBN/ESCO1/DUT/DBF4B/MCIDAS/PDS5A/POLB/ZPR1/SUPT16H/S100A11/LRWD1/POLA1/ATAD5/CDC34/DHX9/RBBP8/CDK2/PIF1/EHMT2/WRNIP1/GEN1/DNAJC2/DNAJA3/CCNE2/ORC5/BARD1/MCM8/RMI1/GTPBP4/HRAS/PRIM2/DDX11/SSBP1/TIPIN/POLE/RPA3/POLD3/GINS3/BRIP1/BRCA2/DONSON/NASP/BLM/TOP1/TOPBP1/POLE3/SSRP1/PRIM1/RFWD3/DDX21/RFC5/FBXO5/WDR18/MGME1/SET/CACYBP/GINS4/BRCA1/REPIN1/POLA2/POLD1/TOP1MT/LIG1/DNA2/EME1/MCM5…
BP	GO:0006261	DNA-dependent DNA replication	151	-0.723248	-2.88248	1e-10	3.5039e-09	2.09342e-09	1393	tags=48%, list=7%, signal=45%	WRNIP1/GEN1/DNAJA3/CCNE2/ORC5/PRIM2/DDX11/SSBP1/TIPIN/POLE/RPA3/POLD3/GINS3/BRCA2/DONSON/BLM/TOPBP1/POLE3/PRIM1/RFWD3/DDX21/RFC5/FBXO5/WDR18/MGME1/GINS4/POLA2/POLD1/LIG1/DNA2/EME1/MCM5/RFC2/POLE2/CDC7/CHEK2/TRAIP/WDHD1/MCM6/E2F7/POLQ/STOML2/ALYREF/CHTF18/GMNN/DBF4/DSCC1/RFC4/TICRR/ORC6/POLD2/E2F8/RAD51/TIMELESS/MCM10/MCM3/RFC3/GINS1/PCNA/FEN1/TONSL/MCM7/ORC1/HMGA1/GINS2/MCM4/CDC45/CCNE1/CDC6/MCM2…
BP	GO:0006270	DNA replication initiation	40	-0.817375	-2.51875	1e-10	3.5039e-09	2.09342e-09	1974	tags=72%, list=10%, signal=65%	LRWD1/POLA1/CDC34/WRNIP1/CCNE2/ORC5/PRIM2/POLE/GINS3/TOPBP1/POLE3/PRIM1/WDR18/POLA2/MCM5/POLE2/MCM6/TICRR/ORC6/MCM10/MCM3/MCM7/ORC1/MCM4/CDC45/CCNE1/CDC6/MCM2/CDT1
BP	GO:0006289	nucleotide-excision repair	107	-0.628098	-2.35598	1e-10	3.5039e-09	2.09342e-09	4573	tags=53%, list=23%, signal=41%	USP7/POLR2A/POLR2C/RBX1/RPA1/ISY1/DDB2/POLR2K/PNKP/FANCC/AQR/COPS7B/COPS6/TP53/RFC1/SLC30A9/RPA2/POLR2I/COPS3/LIG3/POLR2G/ERCC2/DDB1/MNAT1/CHD1L/POLR2E/POLR2B/NTHL1/POLR2J/TCEA1/POLR2L/COPS5/CDK7/RAD23A/GPS1/RAD23B/POLR2D/GTF2H3/CUL4A/PRPF19/PARP1/HMGN1/HMGB1/POLE/RPA3/POLD3/BRIP1/BRCA2/RFC5/POLR2H/POLD1/LIG1/RFC2/RFC4/POLD2/RFC3/PCNA
BP	GO:0006302	double-strand break repair	228	-0.593051	-2.45266	1e-10	3.5039e-09	2.09342e-09	3496	tags=43%, list=18%, signal=36%	SIRT6/FANCM/WRN/OTUB2/UBE2V2/LIG3/MAD2L2/CIB1/RNF138/MMS22L/RAD54B/UBE2N/XRCC3/DTX3L/MDC1/NBN/XRCC5/PALB2/SFPQ/SUMO1/HMGA2/MAGEF1/WRAP53/NABP2/POLB/PARP2/SPIRE2/VCP/TDP1/PPP4R2/POLA1/FANCB/OTUB1/PPP4C/HSF1/HMCES/PAXIP1/APTX/KDM1A/PRPF19/DDX1/RBBP8/XRCC6/PARP1/ACTR5/GEN1/DCLRE1B/HMGB1/BARD1/MCM8/RMI1/DDX11/DEK/BRCC3/PRKDC/RPA3/UBQLN4/DCLRE1A/BRIP1/BRCA2/BLM/PSMD14/RAD21/RFWD3/FIGNL1/MSH2/GINS4/BRC…
BP	GO:0006310	DNA recombination	263	-0.552672	-2.31781	1e-10	3.5039e-09	2.09342e-09	2742	tags=35%, list=14%, signal=31%	RAD54B/UBE2N/XRCC3/MCRS1/TPRKB/NBN/MSH6/XRCC5/PALB2/SFPQ/APEX2/MAGEF1/WRAP53/NABP2/POLB/NONO/PSMC3IP/CCNB1IP1/TNFSF13/EXOSC3/PPP4R2/FANCB/PPP4C/APEX1/SUPV3L1/HMCES/PAXIP1/KDM1A/RBBP8/PIF1/XRCC6/PARP1/ACTR5/GEN1/HMGB1/TSN/MCM8/RMI1/UCHL5/PRKDC/RPA3/UBQLN4/BRIP1/BRCA2/BLM/PSMD14/RUVBL1/RAD21/RFWD3/UNG/TCF3/FIGNL1/MSH2/ENDOG/RUVBL2/GINS4/BRCA1/ACTL6A/EME1/MCM5/CDC7/RMI2/MCM6/PARPBP/FANCD2/POLQ/CHEK1…
BP	GO:0006323	DNA packaging	159	-0.58592	-2.36349	1e-10	3.5039e-09	2.09342e-09	1283	tags=48%, list=7%, signal=45%	SPTY2D1/DFFB/CTCF/GRWD1/SIRT6/CDAN1/SART3/BRD2/RBBP4/RBBP7/NAP1L4/MIS18BP1/IPO4/CDKN2A/CHMP1A/PARP10/HIRA/PIWIL1/HMGA2/LIN54/DAXX/ITGB3BP/HAT1/BANF1/HMGB1/ANP32B/CENPL/NCAPH2/BEND3/HDAC1/NAA10/CENPV/CENPK/CENPQ/NASP/DNMT1/TRIM28/CENPI/RUVBL1/POLE3/SOX9/NPM1/HELLS/SET/NOC2L/CENPO/AIFM1/SRPK1/SUV39H1/CHAF1A/NCAPD3/HMGB2/CENPN/INCENP/CHAF1B/CENPH/NCAPD2/SMC4/CENPW/SMC2/CENPU/MIS18A/OIP5/NCAPG2/HMGA1…
BP	GO:0006353	DNA-templated transcription, termination	71	-0.686358	-2.38235	1e-10	3.5039e-09	2.09342e-09	4473	tags=69%, list=23%, signal=54%	TTF1/POLR2A/SMN1/POLR2K/TAF1A/CPSF2/TBP/MED18/SSU72/CPSF7/SCAF4/ERCC2/PABPN1/PAPOLA/ZNF473/CLP1/XRN2/NUDT21/MNAT1/POLR1E/FIP1L1/POLR2E/NCBP1/NCBP2/POLR2L/POLR1A/CDK7/CSTF1/CSTF3/TAF1D/SNRPD3/CPSF4/GTF2H3/DHX9/CPSF3/MAZ/TTF2/CPSF1/POLR3K/POLR1B/SNRPE/PRMT5/SNRPF/SNRPG/POLR2H/CSTF2/POLR1C/SLBP/SNRPB
BP	GO:0006364	rRNA processing	210	-0.6897	-2.80282	1e-10	3.5039e-09	2.09342e-09	4116	tags=69%, list=21%, signal=55%	ERI3/RPS17/SHQ1/RPL35A/METTL15/ZNHIT3/WDR36/RPF1/SIRT7/UTP3/WDR55/NAF1/DDX51/RPP38/DDX27/RPS16/FTSJ3/SART1/NOP10/NOP9/URB1/POP5/RSL1D1/UTP20/DIS3/ERCC2/MPHOSPH10/RCL1/EXOSC10/TRMT112/XRN2/DDX52/ERI2/RPS6/UTP15/IMP3/ESF1/UTP6/BMS1/RPUSD4/DDX10/PIH1D1/PELP1/RPL35/ERI1/WBP11/RRP36/RPS15/NGDN/POP4/TFB1M/LSM6/METTL5/RPUSD3/MRPL1/DHX37/RPL7/MAK16/TSR1/RPL14/RPUSD2/RPS21/WDR46/RPL7A/RIOK1/EXOSC3/MRM1/HE…
BP	GO:0006397	mRNA processing	495	-0.53591	-2.34568	1e-10	3.5039e-09	2.09342e-09	5472	tags=59%, list=28%, signal=43%	RBMXL1/PRPF8/CDK13/UBL5/DDX46/SRSF11/MBNL3/PRKRIP1/HNRNPLL/ERCC3/SFSWAP/RNGTT/ZC3H14/PRPF38B/ZCCHC8/RNF113A/PCBP4/AKAP17A/GTF2F1/RPRD1A/SF3A1/ACIN1/PRMT7/RBM22/SUGP1/AAR2/SNUPN/CLASRP/SRRM1/ZNF326/SUGP2/SYMPK/DHX38/THOC1/TFIP11/SLTM/HNRNPUL1/TSEN2/BCAS2/CCNT1/PRPF3/PRPF39/RBM19/POLDIP3/FXR1/TRA2A/RBM8A/POLR2A/ADAR/HNRNPH2/RBMX2/SNRPB2/POLR2C/TUT1/CTNNBL1/FUS/ISY1/DDX39B/SMN1/THOC7/SNRNP70/MFAP1/I…
BP	GO:0006399	tRNA metabolic process	151	-0.65999	-2.63036	1e-10	3.5039e-09	2.09342e-09	5037	tags=70%, list=26%, signal=52%	NSUN6/PUS3/DTD1/MOCS3/TRNT1/TRMT61B/SARS2/TSEN2/CARS2/MTFMT/KTI12/HARS2/ELP3/METTL2B/TRMT5/GATB/DALRD3/WARS2/RPP38/RTCB/C9orf64/ELP6/QTRT1/POP5/DUS2/METTL1/TSEN15/TRPT1/TRIT1/TP53RK/THUMPD2/TARBP1/TRMT10A/TRMT112/ELAC2/CLP1/GATC/THUMPD3/RPP21/PTCD1/RPUSD4/DTD2/CTU1/PPA2/METTL2A/URM1/EARS2/DUS4L/TPRKB/DUS3L/TRMT61A/CTU2/POP4/TRUB1/LSM6/ADAT2/TSEN34/FTSJ1/AIMP1/CDK5RAP1/TRMT6/QRSL1/TRMT11/VARS2/CPS…
BP	GO:0006401	RNA catabolic process	396	-0.491432	-2.1209	1e-10	3.5039e-09	2.09342e-09	4495	tags=53%, list=23%, signal=42%	RPL3/NUP214/FXR1/AKT1/SMG9/RBM8A/RPL6/RPS28/RPL9/RPL30/PPP2R1A/FUS/RPS11/GSPT1/RPL36/RPS3A/RPS13/RPL4/PSME4/CNOT1/PKP1/RPS17/RPL35A/METTL3/LSM1/RPL32/RPL41/PSMD4/PCID2/UPF1/PRKCD/TOB1/ELAVL1/CNOT6/DCPS/EDC4/NANOS3/TAF15/PSMD6/RPL38/RPS10/NAF1/IGF2BP3/SKIV2L/RPS12/RPS16/HBS1L/RPL23A/FMR1/RPL18A/DROSHA/RPS26/HSPA8/DIS3/PSMD10/CNOT7/POLR2G/RPS4X/PPP1R8/EXOSC10/PSMD7/MAGOHB/PSMF1/LARP4B/PSMC1/PSMB6/R…
BP	GO:0006402	mRNA catabolic process	359	-0.494516	-2.10933	1e-10	3.5039e-09	2.09342e-09	4562	tags=55%, list=23%, signal=43%	RPL3/NUP214/FXR1/AKT1/SMG9/RBM8A/RPL6/RPS28/RPL9/RPL30/PPP2R1A/FUS/RPS11/GSPT1/RPL36/RPS3A/RPS13/RPL4/PSME4/CNOT1/PKP1/RPS17/RPL35A/METTL3/LSM1/RPL32/RPL41/PSMD4/PCID2/UPF1/PRKCD/TOB1/ELAVL1/CNOT6/DCPS/EDC4/NANOS3/TAF15/PSMD6/RPL38/RPS10/IGF2BP3/SKIV2L/RPS12/RPS16/HBS1L/RPL23A/FMR1/RPL18A/RPS26/HSPA8/DIS3/PSMD10/CNOT7/POLR2G/RPS4X/EXOSC10/PSMD7/MAGOHB/PSMF1/LARP4B/PSMC1/PSMB6/RPS5/PSMD1/XRN2/RPL2…
BP	GO:0006403	RNA localization	227	-0.586106	-2.41895	1e-10	3.5039e-09	2.09342e-09	4262	tags=59%, list=22%, signal=47%	DDX39B/SENP2/THOC7/IWS1/SHQ1/RBM15B/ZNHIT3/CPSF2/PCID2/UPF1/ENY2/SDAD1/NAF1/CPSF6/IGF2BP3/CHTOP/NUP133/FMR1/NOP10/NOP9/EXOSC10/NMD3/MAGOHB/PABPN1/TOMM20/NUP153/POM121/THOC2/FIP1L1/AGFG1/SRSF6/NUP93/PIH1D1/NUP62/NUP98/PRPF6/NCBP1/U2AF2/AHCTF1/SFPQ/RPS15/NCBP2/SEC13/KHDRBS1/POM121C/NUP88/YBX1/NUP160/NUP54/SMG5/WRAP53/SRSF3/HNRNPU/SMG7/MEX3D/RNPS1/NUP107/NUP43/UPF3B/AAAS/SRSF7/EIF4E/EXOSC3/THOC6/LSG…
BP	GO:0006405	RNA export from nucleus	138	-0.683345	-2.70735	1e-10	3.5039e-09	2.09342e-09	4534	tags=67%, list=23%, signal=52%	NUP214/POLDIP3/RBM8A/DDX39B/THOC7/IWS1/RBM15B/CPSF2/PCID2/UPF1/ENY2/SDAD1/CPSF6/CHTOP/NUP133/NOP9/NMD3/MAGOHB/PABPN1/NUP153/POM121/THOC2/FIP1L1/AGFG1/SRSF6/NUP93/NUP62/NUP98/NCBP1/U2AF2/RPS15/NCBP2/SEC13/KHDRBS1/POM121C/NUP88/NUP160/NUP54/SMG5/SRSF3/SMG7/RNPS1/NUP107/NUP43/UPF3B/AAAS/SRSF7/EIF4E/THOC6/LSG1/CPSF4/NUP62CL/NUP155/HNRNPA1/POLR2D/MAGOH/XPOT/DHX9/SSB/SRSF2/CPSF3/NXT1/EIF6/NUP85/XPO1/LT…
BP	GO:0006406	mRNA export from nucleus	110	-0.669743	-2.544	1e-10	3.5039e-09	2.09342e-09	4953	tags=69%, list=25%, signal=52%	SRRM1/TPR/SYMPK/DHX38/THOC1/NUP214/POLDIP3/RBM8A/DDX39B/THOC7/IWS1/RBM15B/CPSF2/PCID2/UPF1/ENY2/CHTOP/NUP133/MAGOHB/PABPN1/NUP153/POM121/THOC2/FIP1L1/AGFG1/SRSF6/NUP93/NUP62/NUP98/NCBP1/U2AF2/NCBP2/SEC13/POM121C/NUP88/NUP160/NUP54/SMG5/SRSF3/SMG7/RNPS1/NUP107/NUP43/UPF3B/AAAS/SRSF7/EIF4E/THOC6/CPSF4/NUP155/POLR2D/MAGOH/SRSF2/CPSF3/NXT1/NUP85/SRSF9/NUP35/SEH1L/THOC3/CPSF1/HNRNPA2B1/NUP50/SRSF1/RAE…
BP	GO:0006414	translational elongation	127	-0.652728	-2.56402	1e-10	3.5039e-09	2.09342e-09	4059	tags=69%, list=21%, signal=55%	GTPBP2/DPH5/MRPL55/EEF1D/MRPL42/MRPL28/EEFSEC/MRPL20/OXA1L/CHCHD1/HBS1L/MRPL40/MRPS31/MRPS24/GADD45GIP1/MRPS27/MRPL27/MRPS18C/RPLP2/MRPL51/MRPL35/MRPL22/DAP3/MRPL32/MRPL24/MRPL57/MRPS16/MRPS25/MRPS33/DPH7/EEF1B2/MRPL1/MRPS7/MRPS23/MRPL30/MRPL52/MRPS30/MRPL9/MRPL41/MRPS10/MRPS15/MRPL21/MRPS22/SRP9/MRPL45/MRPS18B/MRPS28/ZNF598/AURKAIP1/TSFM/GFM1/MRPL48/MRPL19/MRPL49/MRPS9/MRPS18A/MRPL17/TUFM/MRPL16…
BP	GO:0006415	translational termination	102	-0.703991	-2.6046	1e-10	3.5039e-09	2.09342e-09	4004	tags=77%, list=20%, signal=62%	MRPL55/UPF1/MRPL42/MRPL28/MRPL20/OXA1L/CHCHD1/MRPL40/GFM2/MRPS31/MRPS24/GADD45GIP1/MRPS27/TRMT112/MRPL27/MRPS18C/MRPL51/MRPL35/MRPL22/DAP3/MRPL32/MRPL24/MRPL57/MRPS16/MRPS25/MRPS33/MRRF/MRPL1/MRPS7/MRPS23/MRPL30/MRPL52/MRPS30/MRPL9/MRPL41/MRPS10/MRPS15/MRPL21/MRPS22/MRPL45/MRPS18B/MRPS28/AURKAIP1/MRPL48/MRPL19/MRPL49/MRPS9/MRPS18A/MRPL17/MRPL16/PTCD3/MRPL36/MRPL50/MRPS35/MRPL39/MRPL18/MRPL11/MRPL…
BP	GO:0006520	cellular amino acid metabolic process	295	-0.477896	-2.06497	1e-10	3.5039e-09	2.09342e-09	3402	tags=42%, list=17%, signal=35%	ILVBL/PSMD10/ADI1/FN3K/PSMD7/PSMF1/SLC39A8/PSMC1/PTS/PSMB6/PSMD1/NIT2/CTPS2/PSMA6/SERINC5/SEPHS1/GATC/PSMD8/PSMD5/MCCC1/MTHFD2L/GSTZ1/PPA2/PEMT/PSMC3/GCLM/EARS2/PSMB10/QDPR/MTAP/PYCR2/PSME1/AASDHPPT/GLDC/FPGS/AFMID/SHMT1/AIMP1/THAP4/ACY1/AZIN1/PSMD12/ALDH4A1/PSMC6/DLD/QRSL1/PSMB9/PSMC2/VARS2/PFAS/GAD1/PSMB2/PARS2/PSMB4/PSMD13/BCAT2/PSMB1/PSMA7/GCSH/ASL/PSMD11/ASNS/TARS2/PSMC4/IDO1/ALDH18A1/EEF1E1…
BP	GO:0006611	protein export from nucleus	180	-0.600971	-2.45116	1e-10	3.5039e-09	2.09342e-09	4262	tags=62%, list=22%, signal=49%	DDX39B/THOC7/IWS1/XPO6/RBM15B/TP53/TCF7L2/PARK7/SIRT7/CPSF2/PCID2/UPF1/ENY2/GSK3B/SDAD1/CHTOP/NUP133/NOP9/EMD/DUSP16/DESI1/NMD3/MAGOHB/PABPN1/NUP153/STRADB/POM121/THOC2/FIP1L1/AGFG1/SRSF6/NUP93/NUP62/NUP98/NCBP1/U2AF2/XPO4/RPS15/NCBP2/SEC13/POM121C/NUP88/NUP160/NUP54/SMG5/SRSF3/SMG7/XPO7/RNPS1/NUP107/NUP43/UPF3B/UHMK1/AAAS/SRSF7/EIF4E/THOC6/LSG1/CPSF4/NUP155/POLR2D/MAGOH/XPOT/SSB/CALR/IFI27/SRSF2…
BP	GO:0006816	calcium ion transport	388	0.562042	1.83613	1e-10	3.5039e-09	2.09342e-09	3292	tags=32%, list=17%, signal=27%	PLN/CCL19/MYLK/CCL21/JPH2/CASQ2/GEM/CACNA1H/CXCL12/GNAO1/CAV1/RRAD/ATP1A2/RAMP2/RAMP1/SLC24A3/ATP2B4/ANXA6/MS4A1/RAMP3/APLNR/PRKCB/PDGFRB/CCL2/CACNA2D1/PKD2/NCS1/CXCR4/DMD/CCR7/THY1/ANK2/CLIC2/F2R/GJA1/HSPA2/F2RL3/CALCRL/CACNA1C/FGF2/ITPR1/GJA4/AHNAK/RGS4/REM1/SPINK1/PRNP/ADRA2A/GAS6/PTPRC/EHD3/CACNB2/PDE4B/PKD1/TRPC1/CYSLTR1/GPER1/IL16/FYN/PLP1/CX3CL1/ATP2A3/AKAP6/BCL2/PIK3CG/RGS9/P2RX1/CD19/CD4…
BP	GO:0006839	mitochondrial transport	239	-0.491936	-2.03426	1e-10	3.5039e-09	2.09342e-09	4458	tags=47%, list=23%, signal=37%	NAIF1/BAP1/IMMP1L/BLOC1S2/SLC25A24/PARL/HPS4/YWHAQ/UBE2L3/TP53/HAX1/DNAJC19/GSK3B/MID1IP1/TOMM40L/RHOT2/HEBP2/GSK3A/OXA1L/SLC25A37/CPT2/MCU/MICU2/COX18/TIMM22/SAMM50/SLC39A8/OPA1/ZNF205/TOMM20/SLC25A32/SAE1/PMPCB/STARD3/HIP1R/TIMM9/TIMM23/TMEM14B/SFXN2/BBC3/TP73/TIMM21/HSPA4/MRS2/VDAC2/TMEM102/BAG4/YWHAG/CASP8/MCUR1/GRPEL2/SLC25A38/ACACA/ROMO1/SLC25A13/TIMM17B/BCS1L/PDCD5/SREBF2/TMEM14A/AFG3L2/AB…
BP	GO:0006874	cellular calcium ion homeostasis	429	0.586872	1.91643	1e-10	3.5039e-09	2.09342e-09	3292	tags=37%, list=17%, signal=32%	PLN/CCL19/CCL21/JPH2/ADCY5/CASQ2/CXCL12/S1PR1/CAV1/ATP1A2/SLC24A3/S1PR3/CCL11/ATP2B4/EDNRA/ANXA6/PTGER1/MS4A1/RAMP3/DMPK/APLNR/PRKCB/PDGFRA/CD52/LPAR1/CACNA2D1/PKD2/NCS1/CXCR4/DMD/CCR7/THY1/ANK2/CLIC2/CD36/F2R/GJA1/PTGER3/F2RL3/CACNA1C/FGF2/ITPR1/CXCL13/CDH5/LRP1/C1QTNF1/KCNK3/F2RL2/EDNRB/PRNP/PTPRC/EDN1/P2RY8/GHRL/ACKR3/AGTR1/CACNB2/PTGFR/CNR1/CAV2/P2RY10/DLG4/PKD1/TRPC1/CX3CR1/CCR4/CYSLTR1/GPER…
BP	GO:0006913	nucleocytoplasmic transport	334	-0.431461	-1.85081	1e-10	3.5039e-09	2.09342e-09	4534	tags=51%, list=23%, signal=40%	NUP214/SHH/IPO7/POLDIP3/AKT1/IFNG/RBM8A/ZIC1/PPP1R10/DDX39B/SMN1/HDAC3/THOC7/IWS1/KPNA3/XPO6/RBM15B/TP53/TCF7L2/PARK7/SIRT7/CPSF2/PCID2/UPF1/PRKCD/ENY2/GSK3B/DDX20/ELAVL1/GEMIN5/SDAD1/CPSF6/PPP1CC/CHTOP/NUP133/NOP9/EMD/GEMIN6/DUSP16/DESI1/NMD3/MAGOHB/PABPN1/TNPO3/NUP153/STRADB/POM121/THOC2/HEATR3/FIP1L1/AGFG1/SRSF6/HTATIP2/NUP93/RSRC1/IPO4/GEMIN7/NUP62/GEMIN2/NUP98/NCBP1/U2AF2/XPO4/RPS15/NCBP2/SE…
BP	GO:0006936	muscle contraction	335	0.669971	2.16999	1e-10	3.5039e-09	2.09342e-09	2597	tags=35%, list=13%, signal=31%	DES/MYH11/HSPB6/ACTG2/CNN1/LMOD1/PLN/SYNM/MYL9/MYLK/ACTA2/SORBS1/CRYAB/CALD1/FLNA/TPM2/PPP1R12B/TACR2/KCNMA1/CASQ2/CACNA1H/SGCA/SSPN/MYOCD/GNAO1/CAV1/ATP1A2/COMP/TMOD1/SULF1/KCNE4/ATP2B4/EDNRA/KIT/ANXA6/KCNJ8/RGS2/VIM/DMPK/SMTN/GSN/TPM1/CACNA2D1/CXCR4/DMD/ITGA1/ACTC1/PRKG1/ANK2/CLIC2/F2R/GJA1/PTGER3/CHRM2/CALCRL/CACNA1C/KCNH2/SMPX/UTRN/CHRNA3/CHGA/RCSD1/SCN4B/EDNRB/ADRA2A/MYOM1/EDN1/KCND3/EHD3/GH…
BP	GO:0006939	smooth muscle contraction	95	0.722736	2.13608	1e-10	3.5039e-09	2.09342e-09	2597	tags=44%, list=13%, signal=39%	MYH11/CNN1/MYLK/ACTA2/TACR2/KCNMA1/MYOCD/CAV1/ATP1A2/COMP/SULF1/ATP2B4/EDNRA/KIT/RGS2/SMTN/PRKG1/F2R/PTGER3/CHRM2/CALCRL/CHRNA3/EDNRB/ADRA2A/EDN1/GHRL/GPER1/P2RX1/HTR2B/TBXA2R/SLC8A1/NMUR1/ADRB2/TBX2/HTR2A/SULF2/PTAFR/SCNN1B/DAPK3/TACR1/DOCK4/CD38
BP	GO:0007005	mitochondrion organization	484	-0.404673	-1.79897	1e-10	3.5039e-09	2.09342e-09	4471	tags=46%, list=23%, signal=37%	NDUFAF2/AKT1/NAIF1/NDUFB5/BAP1/IMMP1L/NDUFV2/NDUFA2/ACAD9/TIMMDC1/BLOC1S2/PARL/SMIM20/PET117/HPS4/YWHAQ/UBE2L3/ECSIT/COA3/TP53/PARK7/NDUFAF6/MSTO1/ZDHHC6/HAX1/SIRT7/CHCHD6/DNAJC19/YME1L1/COX17/GSK3B/NDUFB10/SHARPIN/NDUFA7/TOMM40L/RHOT2/COX16/HEBP2/MFN1/GSK3A/ATG9A/INF2/OXA1L/NDUFB11/NDUFS5/MCU/NDUFS1/COX18/CAMKMT/TTC19/NDUFS8/TIMM22/COX19/LIG3/PSMD10/TMEM126A/C12orf73/SAMM50/FUNDC1/NDUFS7/UQCC1/O…
BP	GO:0007051	spindle organization	171	-0.531852	-2.17197	1e-10	3.5039e-09	2.09342e-09	3134	tags=46%, list=16%, signal=39%	RAB11A/HAUS8/TUBGCP4/CHMP5/HAUS1/CLTC/CHMP2B/KIF2A/TBCE/CHMP1A/SMC3/NUP62/NUDC/HAUS5/CENPJ/HNRNPU/AAAS/VCP/CCSAP/KPNB1/MISP/TUBB/DRG1/HAUS6/RPS3/NTMT1/MAPK15/GPSM2/EZR/RAE1/SMC1A/BCCIP/TUBG1/FBXO5/HSPA1B/CKAP5/KIFC2/RAN/WDR62/CHEK2/BORA/CEP72/SAC3D1/CHMP4C/STMN1/INCENP/CENPH/AUNIP/KNSTRN/NDC80/CENPE/MZT1/ASPM/PSRC1/STIL/ESPL1/KIF23/RCC1/TACC3/NUF2/TTK/RACGAP1/SPC25/KIF11/DLGAP5/KIFC1/PRC1/SPAG5/K…
BP	GO:0007059	chromosome segregation	303	-0.637646	-2.75762	1e-10	3.5039e-09	2.09342e-09	2795	tags=43%, list=14%, signal=37%	SKA2/BAG6/CDC23/XRCC3/PINX1/CHAMP1/MCMBP/CHMP1A/SMC3/NUP62/AXIN2/CSNK2A1/ESCO1/SFPQ/NUDC/CTNNB1/ANAPC1/ANAPC11/HNRNPU/PDS5A/NUP43/CCNB1IP1/KPNB1/BANF1/P3H4/ZW10/RPS3/RAD18/GEN1/CCNE2/NTMT1/PHB2/MAPK15/SEH1L/SPDL1/NCAPH2/RMI1/DDX11/NAA50/NAA10/KNTC1/CENPK/CENPQ/BRIP1/RCC2/MAD2L1BP/TOP1/CEP85/RAD21/SMC1A/SLC25A5/TUBG1/FBXO5/BUB3/NUP37/BRCA1/RAN/SRPK1/EME1/RMI2/ESCO2/DSN1/FANCD2/RRS1/NCAPD3/KIF14/CH…
BP	GO:0007093	mitotic cell cycle checkpoint	152	-0.622586	-2.48412	1e-10	3.5039e-09	2.09342e-09	2719	tags=46%, list=14%, signal=40%	RAD9A/PRCC/XRCC3/MDC1/NBN/PIDD1/CDK5RAP3/HMGA2/NABP2/CARM1/CNOT10/CASP2/RINT1/TRIAP1/PRMT1/ZW10/NAE1/CDK2/E2F4/GEN1/DCLRE1B/SPDL1/BCL2L1/CCND1/KNTC1/TIPIN/MUC1/PRKDC/DONSON/MAD2L1BP/CNOT11/BLM/TOPBP1/RFWD3/MSH2/BUB3/BRCA1/EME1/ZWILCH/CHEK2/TFDP1/CLSPN/FANCD2/E2F7/CHMP4C/CHEK1/TICRR/CDC25C/E2F8/NDC80/PCNA/TTK/GTSE1/ORC1/SFN/BUB1B/E2F1/TRIP13/CENPF/CDC6/ZWINT/AURKB/CDK1/BUB1/PLK1/MAD2L1/CCNB1/CDT1/…
BP	GO:0007160	cell-matrix adhesion	222	0.640536	2.03574	1e-10	3.5039e-09	2.09342e-09	2706	tags=42%, list=14%, signal=37%	APOD/GREM1/CCL21/SFRP1/SORBS1/FBLN5/THBS1/EMILIN1/FERMT2/JAM3/ITGA7/COL3A1/MYOC/ITGA8/SGCE/FAM107A/EPHA3/EFEMP2/ITGBL1/FN1/PHLDB2/ECM2/DLC1/ITGA1/NID1/CCR7/THY1/EPDR1/TEK/CD34/CD36/VCAM1/COL16A1/LRP1/UTRN/SERPINE1/POSTN/LYVE1/ITGA11/RRAS/SNED1/L1CAM/VCL/VTN/BCAM/ACVRL1/NRP1/PKD1/TNN/GPM6B/THBS3/ACTN1/MACF1/ARHGAP6/MADCAM1/CX3CL1/ILK/NID2/ITGAL/ITGB3/BCL2/BST1/BCL6/KDR/CD3E/ITGA4/CORO2B/ACTN2/SEMA…
BP	GO:0007178	transmembrane receptor protein serine/threonine kinase signaling pathway	337	0.593616	1.92267	1e-10	3.5039e-09	2.09342e-09	2448	tags=30%, list=12%, signal=27%	SFRP2/SFRP4/GREM1/CHRDL1/SFRP1/RBPMS2/RGMA/ASPN/LTBP1/GREM2/FMOD/THBS1/EMILIN1/FERMT2/CLDN5/CILP/MYOCD/TGFB1I1/FBN1/LTBP2/LRRC32/FSTL1/CAV1/WWTR1/COL3A1/ROR2/COMP/RBPMS/SULF1/HTRA3/VIM/TMEM100/GPC3/LTBP3/COL1A2/TGFB3/SMAD9/LTBP4/DKK3/ZNF423/DAB2/HTRA1/FGF10/CDH5/TGFB1/EGR1/TGFBR2/ENG/TGFBR3/LDLRAD4/CDKN1C/PEG10/VASN/NREP/CD109/HPGD/CITED2/FSTL3/ACVRL1/CAV2/BMP6/LEF1/INHBA/RGMB/LOX/BMP3/CHRD/SCX/T…
BP	GO:0007188	adenylate cyclase-modulating G protein-coupled receptor signaling pathway	206	0.676967	2.13561	1e-10	3.5039e-09	2.09342e-09	3318	tags=38%, list=17%, signal=32%	PLN/FLNA/AKAP12/ADCY5/GNAO1/S1PR1/RAMP2/RAMP1/VIP/S1PR3/PALM/ATP2B4/EDNRA/PTGER1/RGS2/RAMP3/LPAR1/PTGER3/CHRM2/PDE2A/CALCRL/PRKACB/CHGA/GNAI1/ADRA2A/EDN1/RGS1/GNG2/PTGFR/CNR1/PDE4B/GNAL/GPER1/PTGIR/GNA14/ABCA1/PTGER2/VIPR2/ADCY4/GNAZ/TBXA2R/S1PR4/PTGER4/GRK5/ADRB2/PSAPL1/ADCYAP1/PTHLH/GLP2R/NPY1R/ADCY9/GABBR1/GPR176/AVPR2/ARRDC3/GNAI2/NPR3/PDE4D/PTH1R/GPR65/AKAP13/CNR2/PSAP/GPR161/S1PR2/GPR4/P2RY…
BP	GO:0007189	adenylate cyclase-activating G protein-coupled receptor signaling pathway	120	0.692603	2.09817	1e-10	3.5039e-09	2.09342e-09	3270	tags=40%, list=17%, signal=34%	PLN/ADCY5/S1PR1/RAMP2/RAMP1/VIP/S1PR3/ATP2B4/PTGER1/RAMP3/LPAR1/PTGER3/CALCRL/CHGA/ADRA2A/GNG2/PTGFR/CNR1/PDE4B/GNAL/GPER1/PTGIR/ABCA1/PTGER2/ADCY4/TBXA2R/S1PR4/PTGER4/ADRB2/ADCYAP1/PTHLH/ADCY9/ARRDC3/GNAI2/PDE4D/PTH1R/GPR65/AKAP13/CNR2/GPR161/S1PR2/GPR4/GCG/ADRA1D/GNAQ/ADCY2/DRD1/ADRB3
BP	GO:0007204	positive regulation of cytosolic calcium ion concentration	302	0.637338	2.05272	1e-10	3.5039e-09	2.09342e-09	3292	tags=42%, list=17%, signal=36%	PLN/CCL19/CCL21/JPH2/ADCY5/CASQ2/S1PR1/CAV1/ATP1A2/S1PR3/ATP2B4/EDNRA/PTGER1/MS4A1/RAMP3/APLNR/PDGFRA/CD52/LPAR1/CACNA2D1/PKD2/CXCR4/DMD/CCR7/THY1/ANK2/CLIC2/CD36/F2R/GJA1/PTGER3/F2RL3/CACNA1C/FGF2/ITPR1/CXCL13/LRP1/C1QTNF1/F2RL2/EDNRB/PRNP/PTPRC/EDN1/P2RY8/GHRL/ACKR3/AGTR1/CACNB2/PTGFR/CNR1/P2RY10/DLG4/PKD1/TRPC1/CX3CR1/CCR4/CYSLTR1/GPER1/C3AR1/PTGIR/FYN/PTGER2/C5AR1/CX3CL1/AKAP6/AVPR1A/BCL2/PIK…
BP	GO:0007409	axonogenesis	451	0.525337	1.71655	1e-10	3.5039e-09	2.09342e-09	3958	tags=39%, list=20%, signal=32%	NEXN/NDN/MAP1B/BOC/NGFR/SLIT3/PALLD/CXCL12/NTN1/LAMA2/GFRA1/SLIT2/MAP1A/CDH11/EPHA3/FN1/VSTM2L/PDLIM7/NRP2/NFASC/PTPRM/APBB1/CXCR4/THY1/PTPRS/GLI3/ROBO1/ISL1/EPHA7/NTN4/SEMA3G/LRP1/NRXN3/EVL/MAP6/SEMA3C/EGR2/CSF1R/SMO/GLI2/KLF7/NOTCH3/PLXNA4/L1CAM/VCL/FEZ1/SEMA6A/DCLK1/OLFM1/NRP1/PLA2G10/DOK5/CRABP2/NCAM1/CNTN4/PLXNC1/FLRT2/CHN1/CRMP1/TNN/MACF1/UST/SEMA6B/FYN/DPYSL2/NPTX1/EMB/SCN1B/PTCH1/ADARB1/B…
BP	GO:0007517	muscle organ development	300	0.621317	2.00112	1e-10	3.5039e-09	2.09342e-09	2572	tags=32%, list=13%, signal=28%	TAGLN/FHL1/MYLK/ELN/CRYAB/DCN/JPH2/CACNA1H/SGCA/MYOCD/ASB2/ITGA7/SVIL/S1PR1/CAV1/LAMA2/HEYL/POPDC2/SGCE/CFL2/MEOX2/SGCD/EFEMP2/HEG1/EVC/SMTN/IGF2/MEF2C/COL6A3/SPEG/TPM1/BASP1/BVES/DMD/SMYD1/ACTC1/TCF21/CTF1/MSC/ISL1/MRAS/TGFB1/EGR1/UTRN/ENG/TGFBR3/EGR2/EGR3/NR2F2/SMO/ITGA11/VAMP5/MYOM1/ZFPM2/NUPR1/POU6F1/CDON/BTG2/CAV2/LEF1/HLF/IGF1/LOX/FHL3/MEF2A/SCX/TWIST1/SOX15/ADARB1/BCL2/PAX5/RBM24/ARID5B/MK…
BP	GO:0007596	blood coagulation	324	0.561857	1.81745	1e-10	3.5039e-09	2.09342e-09	3769	tags=39%, list=19%, signal=32%	MYL9/FBLN1/FLNA/A2M/SELP/THBS1/SERPING1/F13A1/CAV1/EHD2/CSRP1/COL3A1/PRKAR2B/COMP/AXL/FN1/MMRN1/SERPINE2/PRKCB/PDGFRA/COL1A2/THBD/VWF/PRKG1/CD34/CD36/F2R/F2RL3/ITPR1/PRKACB/PROS1/C1QTNF1/DOCK11/COL1A1/F2RL2/SERPINE1/ADRA2A/GAS6/ZFPM2/EDN1/PLAT/FAP/EHD3/PDPN/ENTPD1/VCL/GNG2/VTN/TLN1/PEAR1/BLK/ST3GAL4/GNA14/FYN/ILK/WAS/TLR4/TFPI2/ITGB3/PIK3CG/P2RX1/APOE/DOCK8/TFPI/F8/TBXA2R/CD59/PRKCH/GATA3/PLCG2/T…
BP	GO:0007599	hemostasis	328	0.561439	1.81695	1e-10	3.5039e-09	2.09342e-09	3769	tags=39%, list=19%, signal=32%	MYL9/FBLN1/FLNA/A2M/SELP/THBS1/SERPING1/F13A1/CAV1/EHD2/CSRP1/COL3A1/PRKAR2B/COMP/AXL/FN1/MMRN1/SERPINE2/PRKCB/PDGFRA/COL1A2/THBD/VWF/PRKG1/CD34/CD36/F2R/F2RL3/ITPR1/PRKACB/PROS1/C1QTNF1/DOCK11/COL1A1/F2RL2/SERPINE1/ADRA2A/GAS6/ZFPM2/EDN1/PLAT/FAP/EHD3/PDPN/ENTPD1/FLI1/VCL/GNG2/VTN/TLN1/PEAR1/BLK/ST3GAL4/GNA14/FYN/ILK/WAS/TLR4/TFPI2/ITGB3/PIK3CG/P2RX1/APOE/DOCK8/TFPI/F8/TBXA2R/CD59/PRKCH/GATA3/PL…
BP	GO:0008016	regulation of heart contraction	232	0.604892	1.92632	1e-10	3.5039e-09	2.09342e-09	2328	tags=32%, list=12%, signal=29%	DES/PLN/HSPB7/FLNA/CASQ2/CACNA1H/GNAO1/FXYD6/CAV1/ABCC9/ATP1A2/POPDC2/KCNE4/ATP2B4/RGS2/DMPK/CELF2/TPM1/CACNA2D1/AGT/BVES/DMD/NPR1/ANK2/ATP1B2/CLIC2/GJA1/CHRM2/CACNA1C/ITPR1/ISL1/KCNH2/RGS4/CHGA/KCNK3/SCN4B/EDN1/KCND3/EHD3/GJC1/NPR2/CACNB2/EPAS1/PDE4B/TRPC1/FXYD1/MEF2A/GJA5/ATP2A3/SCN1B/AVPR1A/KCNA5/PIK3CG/SLC8A1/CACNG4/STC1/KCNE2/TAC1/TBX2/TGFB2/KCND1/GSTM2/THRB/SNTA1/RNLS/PDE4D/NPPC/SEMA3A/CASQ…
BP	GO:0008033	tRNA processing	119	-0.647795	-2.49283	1e-10	3.5039e-09	2.09342e-09	3670	tags=56%, list=19%, signal=46%	RPP38/RTCB/C9orf64/ELP6/QTRT1/POP5/DUS2/METTL1/TSEN15/TRPT1/TRIT1/TP53RK/THUMPD2/TARBP1/TRMT10A/TRMT112/ELAC2/CLP1/THUMPD3/RPP21/PTCD1/RPUSD4/CTU1/METTL2A/URM1/DUS4L/TPRKB/DUS3L/TRMT61A/CTU2/POP4/TRUB1/LSM6/ADAT2/TSEN34/FTSJ1/CDK5RAP1/TRMT6/TRMT11/CPSF4/ADAT3/WDR4/SSB/DDX1/TRMU/PUSL1/RPP40/TRMT1/AARS2/GTPBP3/HSD17B10/CPSF1/POP1/LAGE3/GRSF1/PUS1/POLR3K/TRMT10C/NSUN2/RPP25L/DUS1L/NAT10/TSEN54/CSTF2…
MF	GO:0008201	heparin binding	154	0.729943	2.25822	1e-10	3.5039e-09	2.09342e-09	1659	tags=38%, list=8%, signal=35%	THBS4/PRELP/CCDC80/SMOC2/SFRP1/SOD3/RSPO3/FGF7/GREM2/SELP/THBS1/TNXB/SLIT3/PTN/FBN1/ADAMTS1/LTBP2/CRISPLD2/FSTL1/THBS2/CLEC3B/SLIT2/FGFR1/CFH/COMP/EFEMP2/ADAMTS8/FN1/LTF/SERPINE2/GPNMB/NRP2/PCOLCE/SELL/ECM2/PTPRS/FGF10/MMP7/FGF2/CXCL13/COL5A1/TGFBR3/CTSG/NDNF/LXN/POSTN/PTPRC/VTN/LPL/NRP1/THBS3/RSPO2/REG4/PTCH1/EVA1C/APOE/RSPO1/VEGFB/PLA2G2D
BP	GO:0008380	RNA splicing	437	-0.516336	-2.29661	1e-10	3.5039e-09	2.09342e-09	5472	tags=60%, list=28%, signal=44%	RBMXL1/PRPF8/CDK13/UBL5/DDX46/SRSF11/MBNL3/PRKRIP1/HNRNPLL/SFSWAP/PRPF38B/ZCCHC8/RNF113A/PCBP4/PPP2CA/AKAP17A/GTF2F1/SF3A1/ACIN1/PRMT7/RBM22/SUGP1/AAR2/SNUPN/CLASRP/SRRM1/TMBIM6/ZNF326/SUGP2/SYMPK/DHX38/THOC1/TFIP11/HNRNPUL1/TSEN2/BCAS2/PRPF3/PRPF39/RBM19/FXR1/CLK2/TRA2A/RBM8A/POLR2A/HNRNPH2/RBMX2/PPP2R1A/SNRPB2/POLR2C/CTNNBL1/FUS/ISY1/DDX39B/SMN1/RPS13/THOC7/SNRNP70/MFAP1/IWS1/POLR2K/HNRNPH1/AQR…
BP	GO:0009451	RNA modification	152	-0.550888	-2.19804	1e-10	3.5039e-09	2.09342e-09	5800	tags=62%, list=29%, signal=44%	TYW3/PCIF1/ALKBH1/JMJD6/ELP4/ELP5/FDXACB1/RNMT/MTO1/NSUN4/EMG1/PUS7L/TRMT13/NSUN6/PUS3/MOCS3/TRMT61B/HENMT1/MTFMT/ZCCHC4/ADAR/KTI12/ELP3/METTL2B/TRMT5/RBM15B/METTL15/METTL3/NAF1/FTSJ3/MEPCE/C9orf64/ELP6/NOP10/QTRT1/CBLL1/DUS2/METTL1/TRIT1/THUMPD2/TARBP1/TRMT10A/TRMT112/RBM15/THUMPD3/RPUSD4/CTU1/METTL2A/URM1/DUS4L/TPRKB/DUS3L/TRMT61A/TRMT2A/CTU2/BAG4/TRUB1/TFB1M/METTL5/ADAT2/RPUSD3/FTSJ1/RPUSD2/CD…
CC	GO:0009897	external side of plasma membrane	314	0.619127	1.99832	1e-10	3.5039e-09	2.09342e-09	3393	tags=45%, list=17%, signal=38%	SELP/THBS1/CXCL12/CD79A/ANTXR1/S1PR1/GFRA1/IL1R1/KIT/MS4A1/HEG1/SERPINE2/FOLR2/CLEC14A/MCAM/PDGFRA/SCARA5/THBD/CXCR4/SLC2A4/ITGA1/CCR7/THY1/ATP1B2/CD34/CD36/CD79B/IGLL5/VCAM1/ITGA5/CD1C/IL6ST/CDH5/GHR/TGFBR2/ENG/TGFBR3/MFGE8/CD22/CRLF1/CD302/LEPR/PRNP/CD248/PTPRC/CD27/CLEC2B/ENOX1/IL3RA/ABCB1/ACKR3/IL7R/BCAM/LIFR/CX3CR1/CCR4/FCER2/CD69/NCAM1/OSMR/ITGAM/CD5/TLR4/P2RX1/CD19/CD4/SPN/CD2/CD3E/CD163/T…
BP	GO:0010389	regulation of G2/M transition of mitotic cell cycle	195	-0.527075	-2.13872	1e-10	3.5039e-09	2.09342e-09	3245	tags=48%, list=16%, signal=41%	PSMD7/PSMF1/PSMC1/PSMB6/RAB11A/PSMD1/NEDD1/HAUS8/HAUS1/PSMA6/PSMD8/PSMD5/PSMC3/PSMB10/PINX1/TUBA4A/NBN/PSME1/HAUS5/DBF4B/CEP78/YWHAG/CDK5RAP3/HMGA2/CENPJ/NABP2/PSMD12/CDK4/PSMC6/PSMB9/ODF2/PSMC2/PSMB2/PSMB4/TUBB/PSMD13/PSMB1/RINT1/PSMA7/HAUS6/NAE1/PSMD11/CDK2/PSMC4/CEP131/PSME3/PSMB7/PSMB3/PSMA4/PSMA5/PSMA3/PSMB5/CCND1/SSNA1/PSMD2/HSP90AA1/YWHAE/PSMB8/RCC2/DONSON/BLM/TOPBP1/PSMD14/RAD21/TUBG1/FBX…
BP	GO:0010948	negative regulation of cell cycle process	323	-0.469044	-2.02555	1e-10	3.5039e-09	2.09342e-09	3347	tags=43%, list=17%, signal=36%	PSMD10/CNOT7/E2F6/PSMD7/PSMF1/NME6/PSMC1/PSMB6/MAD2L2/PSMD1/RBBP4/PSMA6/RBBP7/PSMD8/PSMD5/CNOT3/TFAP4/PSMC3/PSMB10/XRCC3/PINX1/CDKN2A/NBN/LIF/PSME1/PIDD1/CDK5RAP3/HMGA2/CDK2AP2/NABP2/CARM1/MTBP/CNOT10/CASP2/PSMD12/CDK4/TOM1L1/PSMC6/PSMB9/PSMC2/PSMB2/PSMB4/PSMD13/PSMB1/RINT1/RBM14/PSMA7/TRIAP1/CALR/AURKAIP1/PRMT1/ZW10/RBBP8/ADAM10/NAE1/PSMD11/CDK2/PSMC4/E2F4/EHMT2/GEN1/PSME3/SUZ12/PSMB7/SPDL1/PSMB…
BP	GO:0010965	regulation of mitotic sister chromatid separation	62	-0.70308	-2.3955	1e-10	3.5039e-09	2.09342e-09	1497	tags=45%, list=8%, signal=42%	ZW10/GEN1/SPDL1/KNTC1/MAD2L1BP/RAD21/FBXO5/BUB3/NDC80/CENPE/ESPL1/TACC3/TTK/BUB1B/DLGAP5/TRIP13/CENPF/CDC6/ZWINT/AURKB/PTTG1/BUB1/PLK1/MAD2L1/CCNB1/CDT1/UBE2C/CDC20
BP	GO:0014706	striated muscle tissue development	325	0.594107	1.92083	1e-10	3.5039e-09	2.09342e-09	2567	tags=31%, list=13%, signal=27%	MYH11/PLN/GREM1/ELN/PGM5/DCN/PI16/JPH2/MYOCD/ASB2/SVIL/S1PR1/CAV1/HEYL/POPDC2/CFL2/MEOX2/SGCD/RGS2/HEG1/IGF2/PDGFRB/MEF2C/PDGFRA/TPM1/BVES/SMYD1/ACTC1/TCF21/MSC/GLI1/GJA1/FGF2/ISL1/MEIS1/TGFB1/EGR1/RGS4/TGFBR2/FZD7/ENG/TGFBR3/SEMA3C/EGR2/SORBS2/NR2F2/SMO/VAMP5/MYOM1/ZFPM2/EDN1/GJC1/NUPR1/CDON/BTG2/CAV2/LEF1/HLF/IGF1/LOX/OBSL1/MEF2A/SCX/RBP4/TWIST1/RARB/AKAP6/SOX15/ALPK3/BCL2/PAX5/RBM24/SLC8A1/FOX…
CC	GO:0015629	actin cytoskeleton	481	0.543269	1.77744	1e-10	3.5039e-09	2.09342e-09	3395	tags=34%, list=17%, signal=29%	MYH11/ACTG2/SYNPO2/LMOD1/MYL9/MYLK/ACTA2/DPYSL3/SORBS1/PGM5/PDLIM3/CRYAB/CALD1/FLNA/TPM2/NEXN/DDR2/FERMT2/CLDN5/PALLD/JAM3/SVIL/SYNPO/FAM107A/CFL2/GAS7/TMOD1/EPHA3/CLIC4/AXL/LPP/LDB3/FILIP1/SMTN/PRKCB/PDLIM4/GSN/PDLIM7/CDC42EP3/TPM1/PKD2/DLC1/ACTC1/CGNL1/MYADM/TEK/WIPF1/VCAM1/LSP1/UTRN/AHNAK/MYH10/PARVA/RDX/RCSD1/SORBS2/NEURL1B/SH3PXD2B/NOTCH3/VCL/HCLS1/CNR1/CNN3/ABLIM3/ROR1/AFAP1/AIF1/FHL3/PLEKH…
BP	GO:0015931	nucleobase-containing compound transport	246	-0.533274	-2.2337	1e-10	3.5039e-09	2.09342e-09	4277	tags=53%, list=22%, signal=42%	SLC25A24/DDX39B/SENP2/THOC7/IWS1/RBM15B/CPSF2/PCID2/CD47/UPF1/ENY2/SDAD1/CPSF6/IGF2BP3/CHTOP/NUP133/SLC35A4/FMR1/NOP9/NMD3/MAGOHB/PABPN1/TOMM20/NUP153/SLC35D3/POM121/SLC25A32/SLC35C2/SLC35C1/THOC2/FIP1L1/AGFG1/SRSF6/SLC28A3/NUP93/NUP62/NUP98/NCBP1/U2AF2/AHCTF1/SFPQ/ABCD1/RPS15/NCBP2/SEC13/KHDRBS1/POM121C/NUP88/YBX1/NUP160/NUP54/SMG5/SRSF3/HNRNPU/SMG7/RNPS1/NUP107/NUP43/SLC35D2/UPF3B/AAAS/SRSF7/SL…
CC	GO:0015934	large ribosomal subunit	111	-0.674619	-2.55673	1e-10	3.5039e-09	2.09342e-09	4627	tags=68%, list=23%, signal=53%	MRPL38/RPL3/RPL6/RPL9/RPL30/MRPL46/RPL36/RPL4/RPL35A/MRPL55/RPL32/RPL41/RSL24D1/MRPL42/MRPL28/MRPL20/RPL38/MRPL40/RPL23A/RPL18A/MRPL27/RPL24/RPLP2/MPV17L2/MALSU1/MRPL51/RPL37A/MRPL35/RPL36A/MRPL22/RPL19/MRPL32/MRPL24/RPL35/MRPL57/MRPL1/RPL7/RPL14/RPL7A/NDUFAB1/MRPL30/MRPL52/MRPS30/RPL29/MRPL9/RPLP0/MRPL41/RPL18/RPL26L1/MRPL21/MRPL45/MRPL48/MRPL19/MRPL49/RPL12/MRPS18A/MRPL17/MRPL16/MRPL36/MRPL50/M…
BP	GO:0016072	rRNA metabolic process	219	-0.679393	-2.77844	1e-10	3.5039e-09	2.09342e-09	4116	tags=67%, list=21%, signal=53%	ERI3/RPS17/SHQ1/RPL35A/METTL15/ZNHIT3/WDR36/RPF1/SIRT7/UTP3/WDR55/NAF1/DDX51/RPP38/DDX27/RPS16/FTSJ3/SART1/DROSHA/NOP10/NOP9/URB1/POP5/RSL1D1/UTP20/DIS3/ERCC2/MPHOSPH10/RCL1/EXOSC10/TRMT112/XRN2/DDX52/ERI2/RPS6/UTP15/IMP3/ESF1/UTP6/BMS1/RPUSD4/DDX10/PIH1D1/PELP1/RPL35/ERI1/WBP11/RRP36/RPS15/NGDN/POP4/TFB1M/LSM6/METTL5/RPUSD3/MRPL1/DHX37/RPL7/MAK16/TSR1/RPL14/RPUSD2/RPS21/WDR46/RPL7A/RIOK1/EXOSC3/…
MF	GO:0016887	ATPase activity	451	-0.429462	-1.89174	1e-10	3.5039e-09	2.09342e-09	3953	tags=38%, list=20%, signal=31%	UPF1/TAP2/YME1L1/ABCF1/DQX1/DDX20/SPAST/PEX1/ATP2C2/MYO1B/PSMD6/ATP6V1G1/DDX51/ACSL5/SKIV2L/ATP6V1A/DDX27/ABCB6/KIF9/ATP6V1F/FANCM/WRN/HSPA8/DHX16/ERCC2/ATP2C1/G3BP1/DDX41/MYO10/MYO6/PSMC1/ABCB8/ABCF3/RBBP4/ACSM3/DDX52/ASCC3/ATP8B1/ABCA12/ACSL3/DDX55/KIF2A/CHD1L/CLPB/ZGRF1/DDX10/RAD54B/PSMC3/ABCD3/XRCC3/DHX33/DDX23/MSH6/ATP2A2/XRCC5/CLPP/ABCD1/NSF/TOR3A/TOR4A/CDK7/GTF2F2/DHX37/HELZ2/DHX30/SLC27A4…
BP	GO:0019080	viral gene expression	195	-0.531294	-2.15583	1e-10	3.5039e-09	2.09342e-09	5285	tags=66%, list=27%, signal=49%	RPS14/RPL5/RPS27A/SP1/GTF2F1/EIF2D/TRIM31/USF1/TPR/RPS20/RPL31/UBP1/RPS24/RPS29/CCNT1/RPS8/GTF2B/RPL3/NUP214/POLR2A/RPL6/RPS28/RPL9/RPL30/POLR2C/RPS11/RPL36/RPS3A/RPS13/RPL4/POLR2K/RPS17/TAF11/ZNF639/RPL35A/CCL3/RPL32/RPL41/PCBP2/POLR2I/RPL38/RPS10/TRIM27/RPS12/RPS16/NUP133/SPCS1/RPL23A/RPL18A/RPS26/SNW1/POLR2G/RPS4X/TRIM14/RPS5/RPL24/RPLP2/NUP153/EIF3A/RPS6/POM121/RPL37A/RPL36A/RPL19/TRIM11/NUP9…
BP	GO:0019083	viral transcription	178	-0.524598	-2.12882	1e-10	3.5039e-09	2.09342e-09	5285	tags=67%, list=27%, signal=49%	RPS14/RPL5/RPS27A/SP1/GTF2F1/TRIM31/USF1/TPR/RPS20/RPL31/UBP1/RPS24/RPS29/CCNT1/RPS8/GTF2B/RPL3/NUP214/POLR2A/RPL6/RPS28/RPL9/RPL30/POLR2C/RPS11/RPL36/RPS3A/RPS13/RPL4/POLR2K/RPS17/TAF11/ZNF639/RPL35A/CCL3/RPL32/RPL41/POLR2I/RPL38/RPS10/TRIM27/RPS12/RPS16/NUP133/RPL23A/RPL18A/RPS26/SNW1/POLR2G/RPS4X/TRIM14/RPS5/RPL24/RPLP2/NUP153/RPS6/POM121/RPL37A/RPL36A/RPL19/TRIM11/NUP93/TFAP4/PSMC3/POLR2E/POL…
MF	GO:0019838	growth factor binding	130	0.68724	2.09734	1e-10	3.5039e-09	2.09342e-09	2598	tags=49%, list=13%, signal=43%	A2M/IGFBP5/LTBP1/IGFBP4/THBS1/NGFR/IGFBP7/IGFBP6/PTN/LTBP2/LRRC32/COL3A1/IL1R1/DUSP1/FGFR1/HTRA3/PDGFRB/PDGFRA/LTBP3/NRP2/COL1A2/TGFB3/LTBP4/TEK/CD36/SRPX2/HTRA1/IL6ST/CXCL13/COL5A1/GHR/TGFBR2/ENG/TGFBR3/COL1A1/COL6A1/IL10RA/VASN/CD109/IGFBP3/ACVRL1/LIFR/NRP1/OSMR/TWSG1/ITGB3/NRROS/KDR/PXDN/COL4A1/TGFBR1/BMPR2/IL2RG/CRIM1/KL/IL6R/FLT4/ITGAV/EGFR/ACVR1/NTRK2/IGFBP2/FLT1/IL11RA
CC	GO:0019866	organelle inner membrane	482	-0.538123	-2.37594	1e-10	3.5039e-09	2.09342e-09	4675	tags=59%, list=24%, signal=46%	DPY19L4/MTG1/ABCB7/MRPL38/SLC25A43/UQCRB/LDHD/SLC25A25/MRPS11/NDUFAF2/HADHA/NDUFB5/IMMP1L/NDUFV2/MTCH1/NDUFA2/MRPL46/ACAD9/TIMMDC1/SLC25A24/PARL/SMIM20/LEMD2/CLPX/ECSIT/COA3/CKMT1B/NDUFAF6/MRPL55/CHCHD6/DNAJC19/YME1L1/MRPL42/NDUFB10/NDUFA7/MRPL28/COX16/PISD/MRPL20/OXA1L/NRM/SLC25A37/UQCRC2/NDUFB11/NDUFS5/CPT2/CHCHD1/HCCS/MCU/MICU2/NDUFS1/COX18/UQCRQ/TTC19/NDUFS8/TIMM22/MRPL40/EMD/COX7B/SPHK2/COQ5…
BP	GO:0019932	second-messenger-mediated signaling	295	0.593676	1.91203	1e-10	3.5039e-09	2.09342e-09	3753	tags=43%, list=19%, signal=36%	PLN/RCAN2/SELP/THBS1/CASQ2/ATP1A2/PDE3A/PRKAR2B/AQP1/ATP2B4/CAP2/RGS2/DMPK/TMEM100/APLNR/LPAR1/AGT/CXCR4/DMD/NPR1/CCR7/PRKG1/ANK2/CLIC2/CD36/VCAM1/PDE2A/CACNA1C/ITPR1/PDE7B/NFATC4/CD22/RASD2/NDNF/EDNRB/SPINK1/GNAI1/PRNP/PTPRC/EDN1/NPR2/ACKR3/AGTR1/PTGFR/TREM2/CX3CR1/CCR4/IGF1/LRRK2/SELE/LMCD1/AKAP6/AVPR1A/RASD1/BTK/APOE/CD4/PDE9A/HTR2B/BST1/SLC8A1/NMUR1/NFATC1/KDR/CD3E/ADCYAP1/CMKLR1/PLCG2/P2RX7/…
MF	GO:0019955	cytokine binding	135	0.702182	2.1518	1e-10	3.5039e-09	2.09342e-09	3143	tags=53%, list=16%, signal=45%	ACKR1/GREM1/A2M/LTBP1/GREM2/THBS1/LRRC32/IL1R1/COMP/KIT/LTBP3/NRP2/TGFB3/CXCR4/LTBP4/CCR7/CD36/FGF2/IL6ST/GHR/TGFBR2/ENG/TGFBR3/FZD4/CRLF1/LEPR/CSF1R/IL10RA/VASN/CD109/IL3RA/PDPN/ACKR3/ACVRL1/LIFR/NRP1/CX3CR1/CCR4/OSMR/CHRD/TWSG1/ZFP36/ITGB3/CD4/NRROS/PXDN/ITGA4/TGFBR1/BMPR2/IL2RG/IL6R/EBI3/TMC8/CD74/ITGAV/CCR2/CCR5/ITGB1/CNTFR/ACVR1/IL18BP/NBL1/NOG/XCR1/IL11RA/CXCR3/CCR1/IL1RL1/CCR10/ELANE/IL2RB
BP	GO:0022613	ribonucleoprotein complex biogenesis	412	-0.665905	-2.90579	1e-10	3.5039e-09	2.09342e-09	4150	tags=67%, list=21%, signal=54%	ZNF622/CDC73/ERI3/RPS17/SHQ1/CRNKL1/RPL35A/METTL15/ZNHIT3/WDR36/RPF1/RSL24D1/SIRT7/DDX20/UTP3/SF3A3/PWP1/GTPBP10/GEMIN5/MRPL20/SDAD1/SF1/WDR55/RPL38/RPS10/NAF1/CPSF6/CPSF7/DDX51/RPP38/EIF5/PRPF31/DDX27/RPS16/FTSJ3/SART1/RPL23A/SRSF10/DROSHA/NOP10/NOP9/URB1/POP5/RSL1D1/UTP20/DIS3/TAF9/GEMIN6/EIF2A/ERCC2/MPHOSPH10/RCL1/EXOSC10/SART3/NMD3/TRMT112/RPS5/CLP1/XRN2/DDX52/EIF3H/RPL24/ERI2/EIF3A/NUDT21/MP…
BP	GO:0022618	ribonucleoprotein complex assembly	182	-0.625507	-2.55691	1e-10	3.5039e-09	2.09342e-09	4684	tags=66%, list=24%, signal=51%	PRPF3/ATR/PRPF39/EIF3C/RPL3/MRPS11/MDN1/ADAR/RPL6/RPS28/ISY1/DDX39B/SMN1/CDC73/SHQ1/CRNKL1/ZNHIT3/RSL24D1/DDX20/SF3A3/GEMIN5/MRPL20/SF1/RPL38/RPS10/NAF1/CPSF6/CPSF7/EIF5/PRPF31/SART1/RPL23A/SRSF10/TAF9/GEMIN6/SART3/RPS5/CLP1/EIF3H/RPL24/EIF3A/NUDT21/SRSF6/EIF3J/EIF4H/PIH1D1/GEMIN7/DDX23/RBMX/FASTKD2/TXNL4A/GEMIN2/PRPF6/XRCC5/NCBP1/COIL/TRAF7/RPS15/MRPS7/DHX30/DENR/EIF3D/PPAN/SF3A2/NUFIP1/SNRNP200…
BP	GO:0022904	respiratory electron transport chain	100	-0.646685	-2.38033	1e-10	3.5039e-09	2.09342e-09	3857	tags=65%, list=20%, signal=53%	NDUFB10/NDUFA7/UQCRC2/NDUFB11/NDUFS5/NDUFS1/UQCRQ/NDUFS8/COX7B/COQ9/NDUFS7/SDHD/NDUFB2/NDUFB6/DGUOK/COX7A2L/NDUFC1/NDUFA12/COX10/NDUFB4/COX4I1/NDUFA10/ETFA/COX15/COX6B1/NDUFA1/NDUFA9/SDHB/SLC25A13/NDUFA8/NDUFAB1/GHITM/GPD2/NDUFA6/DLD/UQCR10/NDUFS3/COX5B/NDUFB9/NDUFS2/COX6C/NDUFB3/AIFM2/COX8A/MYBBP1A/UQCRHL/UQCC3/DNAJC15/CHCHD2/NDUFV1/NDUFS6/UQCRFS1/COX6A1/SCO2/BID/UQCRH/SDHA/COX5A/COA6/UQCRC1/CYC…
BP	GO:0030001	metal ion transport	464	0.521371	1.70499	1e-10	3.5039e-09	2.09342e-09	3292	tags=30%, list=17%, signal=26%	PLN/CCL19/MYLK/CCL21/JPH2/CASQ2/GEM/CACNA1H/CXCL12/GNAO1/CAV1/RRAD/ATP1A2/RAMP2/RAMP1/SLC24A3/KCNE4/ATP2B4/ANXA6/MS4A1/RAMP3/APLNR/PRKCB/PDGFRB/CCL2/CACNA2D1/PKD2/NCS1/CXCR4/DMD/CCR7/THY1/ANK2/ATP1B2/CLIC2/F2R/GJA1/HSPA2/F2RL3/CALCRL/CACNA1C/FGF2/ITPR1/KCNH2/GJA4/AHNAK/RGS4/REM1/SPINK1/PRNP/TUSC3/ADRA2A/GAS6/PTPRC/KCND3/EHD3/CACNB2/PDE4B/PKD1/TRPC1/ATP4B/FXYD1/CYSLTR1/GPER1/IL16/FYN/PLP1/CX3CL1/A…
CC	GO:0030016	myofibril	221	0.682482	2.16959	1e-10	3.5039e-09	2.09342e-09	1567	tags=26%, list=8%, signal=24%	DES/SYNPO2/LMOD1/SYNM/MYL9/FLNC/PGM5/PDLIM3/CRYAB/CALD1/FLNA/TPM2/PPP1R12B/NEXN/JPH2/CASQ2/FERMT2/PALLD/SVIL/MMP2/ARHGEF25/FBXO32/SYNPO/CSRP1/ABCC9/AHNAK2/CFL2/TMOD1/ATP2B4/KCNJ8/SYNC/LDB3/PDLIM4/PDLIM7/TPM1/DMD/ACTC1/ANK2/CACNA1C/FBXL22/SMPX/SYNE1/AHNAK/PARVA/SORBS2/FHL5/MYOM1/CSRP2/VCL/DST/PDE4B/OBSL1/FHL3/ACTN1/ILK/KCNA5/SLC8A1/KAT2B
CC	GO:0030017	sarcomere	200	0.67615	2.1311	1e-10	3.5039e-09	2.09342e-09	1567	tags=26%, list=8%, signal=24%	DES/SYNPO2/LMOD1/MYL9/FLNC/PGM5/PDLIM3/CRYAB/FLNA/TPM2/PPP1R12B/NEXN/JPH2/CASQ2/FERMT2/PALLD/MMP2/ARHGEF25/FBXO32/SYNPO/CSRP1/ABCC9/AHNAK2/CFL2/TMOD1/ATP2B4/SYNC/LDB3/PDLIM4/PDLIM7/TPM1/DMD/ACTC1/ANK2/CACNA1C/FBXL22/SMPX/SYNE1/PARVA/SORBS2/FHL5/MYOM1/CSRP2/DST/PDE4B/OBSL1/FHL3/ACTN1/ILK/KCNA5/SLC8A1/KAT2B
CC	GO:0030018	Z disc	121	0.708905	2.15144	1e-10	3.5039e-09	2.09342e-09	2492	tags=38%, list=13%, signal=33%	DES/SYNPO2/MYL9/FLNC/PGM5/PDLIM3/CRYAB/FLNA/PPP1R12B/NEXN/JPH2/CASQ2/PALLD/FBXO32/SYNPO/CSRP1/AHNAK2/CFL2/ATP2B4/SYNC/LDB3/PDLIM4/PDLIM7/DMD/ANK2/CACNA1C/FBXL22/PARVA/SORBS2/FHL5/CSRP2/DST/PDE4B/OBSL1/FHL3/ACTN1/KCNA5/SLC8A1/ACTN2/PPP1R12A/FHOD3/CASQ1/ITGB1BP2/FHL2/PPP3CB/RYR2
CC	GO:0030055	cell-substrate junction	415	0.529042	1.72736	1e-10	3.5039e-09	2.09342e-09	2763	tags=33%, list=14%, signal=29%	CNN1/SYNPO2/FHL1/FLNC/TNS1/SORBS1/PGM5/FLNA/NEXN/AKAP12/DDR2/LIMS2/FERMT2/PALLD/TGFB1I1/SVIL/TNC/TNS2/CAV1/CSRP1/ITGA8/SCARF2/FAM107A/ANXA6/ITGBL1/LPP/VIM/DIXDC1/GSN/PDGFRB/MCAM/PDLIM7/LAYN/NFASC/PHLDB2/CSPG4/MRC2/DLC1/DMD/ITGA1/ACTC1/THY1/RHOB/TEK/EFS/MSN/DAB2/GJA1/ITGA5/HSPG2/SMPX/ARHGAP31/LRP1/AHNAK/ENG/PARVA/RDX/EVL/SORBS2/ITGA11/PTPRC/RRAS/CSRP2/FAP/EHD3/L1CAM/VCL/ARHGAP24/TLN1/CNN3/DST/TSPA…
BP	GO:0030198	extracellular matrix organization	382	0.692684	2.25949	1e-10	3.5039e-09	2.09342e-09	2720	tags=48%, list=14%, signal=42%	MYH11/SFRP2/MFAP4/GREM1/CCDC80/FBLN1/SMOC2/COL14A1/ELN/CYP1B1/DCN/MFAP5/A2M/FBLN5/DPT/DDR2/COL8A1/FBLN2/AEBP1/LUM/FMOD/THBS1/EMILIN1/TNXB/TPSAB1/FOXF1/JAM2/JAM3/FBN1/ADAMTS1/ITGA7/TNC/TIMP2/MMP2/CRISPLD2/ANTXR1/CAV1/LAMA2/COL6A2/BGN/COL3A1/ITGA9/ITGA8/RAMP2/CTSK/COMP/COL8A2/SULF1/FOXF2/PECAM1/EFEMP2/ADAMTS8/FN1/COL10A1/PAPLN/VCAN/PDGFRA/COL15A1/COL6A3/LTBP3/LAMA4/COL1A2/PHLDB2/AGT/ECM2/VWF/ITGA1/…
BP	GO:0030199	collagen fibril organization	52	0.809284	2.2171	1e-10	3.5039e-09	2.09342e-09	2044	tags=58%, list=10%, signal=52%	SFRP2/GREM1/COL14A1/CYP1B1/DPT/DDR2/AEBP1/LUM/FMOD/EMILIN1/TNXB/COL3A1/COMP/EFEMP2/COL1A2/LOXL1/COL5A1/COL1A1/COL5A2/LOX/SCX/COL12A1/ADAMTS2/LOXL4/FOXC2/PXDN/TGFBR1/TGFB2/CRTAP/MMP11
BP	GO:0030335	positive regulation of cell migration	487	0.581529	1.90219	1e-10	3.5039e-09	2.09342e-09	3297	tags=44%, list=17%, signal=38%	THBS4/CCL19/MYLK/SMOC2/CCL21/FLNA/IGFBP5/AKAP12/DDR2/FGF7/SELP/THBS1/FERMT2/FOXF1/JAM2/PTN/CXCL12/JAM3/ADAMTS1/S1PR1/CAV1/MYOC/IL1R1/ROR2/FGFR1/AKT3/FAM107A/CCL11/PECAM1/KIT/RHOJ/FN1/TWIST2/PDGFRB/RARRES2/MCAM/PDGFRA/GPNMB/NRP2/ENPP2/LPAR1/AGT/SYDE1/CXCR4/CCR7/THY1/MYADM/RHOB/TEK/SPARC/CXCL14/DAB2/F2R/NR4A3/SRPX2/ITGA5/FGF10/MMP7/FGF2/VEGFC/PDGFD/CXCL13/CDH5/IL34/TGFB1/SEMA3G/LRP1/TGFBR2/RDX/COL1…
BP	GO:0030336	negative regulation of cell migration	247	0.654293	2.08879	1e-10	3.5039e-09	2.09342e-09	2473	tags=40%, list=13%, signal=35%	APOD/SFRP2/GREM1/DPYSL3/PODN/CCL21/SFRP1/CYP1B1/DCN/IGFBP5/IL33/SERPINF1/THBS1/EMILIN1/CLDN5/PTN/CXCL12/MYOCD/COL3A1/SLIT2/DUSP1/MEOX2/SULF1/ATP2B4/CLIC4/MMRN2/MEF2C/CCL2/PHLDB2/TPM1/PTPRM/DLC1/THY1/PRKG1/RHOB/RECK/ATP1B2/GJA1/MCC/TIMP1/ROBO1/FGF2/CXCL13/TGFB1/TIE1/LRP1/CD200/ENG/EVL/LDLRAD4/SERPINE1/NR2F2/RRAS/VCL/CITED2/MITF/IGFBP3/ACVRL1/ARHGDIB/MMP28/CX3CR1/AIF1/RGCC/CHRD/TNN/PFN2/CX3CL1/ADAR…
CC	GO:0030684	preribosome	72	-0.730689	-2.55861	1e-10	3.5039e-09	2.09342e-09	3990	tags=79%, list=20%, signal=63%	ZNF622/WDR36/RPF1/UTP3/FTSJ3/FBXW9/NOP9/RSL1D1/UTP20/MPHOSPH10/IMP3/UTP6/BMS1/XRCC5/RRP36/NGDN/MAK16/TSR1/PPAN/WDR46/RIOK1/HEATR1/RPS7/LAS1L/WDR3/TBL3/RRP7A/EIF6/PDCD11/NOB1/WDR12/RRP1B/WDR74/NOL10/UTP14A/LTV1/NOP14/NIP7/FAM207A/PRKDC/UTP18/PES1/DCAF13/MRTO4/NOC4L/IMP4/NOP58/RRP1/NOL6/EBNA1BP2/NOP56/NOC2L/FBL/RRS1/BYSL/RRP9/BOP1
BP	GO:0031123	RNA 3'-end processing	144	-0.645411	-2.53156	1e-10	3.5039e-09	2.09342e-09	4953	tags=65%, list=25%, signal=49%	SRRM1/TRNT1/SYMPK/DHX38/THOC1/CCNT1/POLDIP3/RBM8A/INTS12/TUT1/DDX39B/THOC7/CDC73/ERI3/RNF40/CPSF2/SSU72/TOE1/CTR9/CPSF6/CPSF7/CHTOP/INTS5/EXOSC10/MAGOHB/PABPN1/PAPOLA/ELAC2/ZNF473/CLP1/ERI2/NUDT21/THOC2/FIP1L1/SRSF6/PTCD1/PABPC1L/ERI1/INTS1/MTPAP/NCBP1/U2AF2/INTS2/NCBP2/SRSF3/RPRD1B/RNPS1/UPF3B/CSTF1/RPS21/SRSF7/EXOSC3/THOC6/CSTF3/CPSF4/HSF1/SUPV3L1/INTS8/NELFE/POLR2D/MAGOH/LEO1/EXOSC7/SSB/SRSF2/…
BP	GO:0031124	mRNA 3'-end processing	96	-0.629596	-2.28782	1e-10	3.5039e-09	2.09342e-09	4953	tags=67%, list=25%, signal=50%	SRRM1/SYMPK/DHX38/THOC1/CCNT1/POLDIP3/RBM8A/TUT1/DDX39B/THOC7/CDC73/RNF40/CPSF2/SSU72/CTR9/CPSF6/CPSF7/CHTOP/MAGOHB/PABPN1/PAPOLA/ZNF473/CLP1/NUDT21/THOC2/FIP1L1/SRSF6/PABPC1L/MTPAP/NCBP1/U2AF2/NCBP2/SRSF3/RPRD1B/RNPS1/UPF3B/CSTF1/SRSF7/THOC6/CSTF3/CPSF4/HSF1/NELFE/POLR2D/MAGOH/LEO1/SRSF2/CPSF3/PABPC1/SRSF9/BARD1/ZC3H3/THOC3/CPSF1/GRSF1/SNRPA/SRSF1/PNPT1/EIF4A3/CSTF2/SLBP/DDX39A/ALYREF/CCNB1
BP	GO:0031145	anaphase-promoting complex-dependent catabolic process	81	-0.729592	-2.63362	1e-10	3.5039e-09	2.09342e-09	3347	tags=65%, list=17%, signal=55%	PSMD10/PSMD7/PSMF1/PSMC1/PSMB6/PSMD1/PSMA6/ANAPC2/PSMD8/PSMD5/PSMC3/CDC23/PSMB10/PSME1/ANAPC1/ANAPC11/PSMD12/PSMC6/PSMB9/PSMC2/PSMB2/PSMB4/PSMD13/PSMB1/PSMA7/PSMD11/CDK2/PSMC4/PSME3/PSMB7/PSMB3/PSMA4/PSMA5/PSMA3/PSMB5/PSMD2/PSMB8/PSMD14/FBXO5/BUB3/PSMD3/PSME2/UBE2S/BUB1B/AURKB/PTTG1/CDK1/PLK1/MAD2L1/CCNB1/AURKA/UBE2C/CDC20
BP	GO:0031424	keratinization	223	-0.47833	-1.96963	1e-10	3.5039e-09	2.09342e-09	3158	tags=12%, list=16%, signal=10%	PCSK6/SPRR2A/DSC2/ABCA12/KRT6A/KRT17/PKP4/CAPN1/KRT6B/SPRR1B/PRSS8/EVPL/DSP/KRT16/PERP/PKP2/CDH3/JUP/DSG2/KRT19/ST14/KRT8/KRT18/PKP3/SFN/PI3
BP	GO:0031570	DNA integrity checkpoint	146	-0.605083	-2.37981	1e-10	3.5039e-09	2.09342e-09	2938	tags=43%, list=15%, signal=37%	USP28/CNOT3/RHNO1/RAD9A/CDC5L/MDC1/NBN/PIDD1/CDK5RAP3/HMGA2/CCAR2/CARM1/CNOT10/CASP2/RINT1/CUL4A/TRIAP1/PRMT1/PRPF19/NAE1/CDK2/DOT1L/E2F4/INTS7/CCND1/TIPIN/MUC1/BRCC3/PRKDC/WDR76/BRIP1/DONSON/CNOT11/BLM/TOPBP1/RFWD3/MSH2/BRCA1/DNA2/EME1/CHEK2/TFDP1/CLSPN/FANCD2/E2F7/CHEK1/TICRR/CDC25C/E2F8/TIMELESS/PCNA/GTSE1/ORC1/DTL/SFN/CDC45/E2F1/CDC6/CDK1/PLK1/CCNB1/CDT1/AURKA
BP	GO:0031589	cell-substrate adhesion	345	0.619993	2.00956	1e-10	3.5039e-09	2.09342e-09	2706	tags=39%, list=14%, signal=35%	APOD/GREM1/CCDC80/FBLN1/CCL21/SFRP1/SORBS1/FLNA/FBLN5/COL8A1/FBLN2/THBS1/LIMS2/EMILIN1/FERMT2/FOXF1/SPOCK1/PTN/JAM3/ITGA7/ANTXR1/COL3A1/MYOC/ITGA8/SGCE/FAM107A/EPHA3/EFEMP2/ITGBL1/AXL/FN1/PHLDB2/ECM2/DLC1/VWF/BVES/ITGA1/NID1/CCR7/THY1/MYADM/EPDR1/TEK/ATP1B2/CD34/CD36/SPOCK2/VCAM1/ITGA5/COL16A1/EDIL3/NTN4/LRP1/UTRN/LGALS1/FZD7/FZD4/PARVA/COL1A1/NDNF/SERPINE1/POSTN/LYVE1/ITGA11/GAS6/RRAS/PDPN/SNED1…
CC	GO:0031674	I band	133	0.705356	2.16063	1e-10	3.5039e-09	2.09342e-09	2492	tags=37%, list=13%, signal=32%	DES/SYNPO2/MYL9/FLNC/PGM5/PDLIM3/CRYAB/FLNA/PPP1R12B/NEXN/JPH2/CASQ2/FERMT2/PALLD/FBXO32/SYNPO/CSRP1/AHNAK2/CFL2/ATP2B4/SYNC/LDB3/PDLIM4/PDLIM7/DMD/ACTC1/ANK2/CACNA1C/FBXL22/PARVA/SORBS2/FHL5/CSRP2/DST/PDE4B/OBSL1/FHL3/ACTN1/KCNA5/SLC8A1/KAT2B/ACTN2/PPP1R12A/FHOD3/CASQ1/ITGB1BP2/FHL2/PPP3CB/RYR2
BP	GO:0032200	telomere organization	142	-0.655876	-2.57231	1e-10	3.5039e-09	2.09342e-09	2657	tags=47%, list=13%, signal=41%	XRCC3/PINX1/TELO2/TPRKB/NBN/XRCC5/SMG5/WRAP53/NABP2/HNRNPU/POLA1/HNRNPC/APEX1/HNRNPD/NHP2/HNRNPA1/PIF1/DOT1L/XRCC6/PARP1/MYC/CCNE2/DCLRE1B/MAPK15/PRIM2/PTGES3/HNRNPA2B1/HSP90AA1/PRKDC/POLE/RPA3/POLD3/DCLRE1A/BRCA2/BLM/CCT4/POLE3/PRIM1/NAT10/CCT2/RFC5/GAR1/TCP1/CCT7/POLA2/CCT3/POLD1/DNA2/RFC2/POLE2/CCT8/CCT5/HSP90AB1/CCT6A/GNL3/RFC4/POLD2/RAD51/EXO1/DKC1/RFC3/PCNA/FEN1/CCNE1/AURKB/NEK2/RECQL4
BP	GO:0032392	DNA geometric change	109	-0.626016	-2.36143	1e-10	3.5039e-09	2.09342e-09	3458	tags=50%, list=18%, signal=41%	FANCM/WRN/ERCC2/G3BP1/ASCC3/DDB1/MNAT1/CHD1L/RAD54B/NBN/XRCC5/GTF2F2/RAD23B/CHD7/SUPV3L1/GTF2H3/DHX9/CUL4A/DDX1/PIF1/XRCC6/PARP1/WRNIP1/HMGB1/MCM8/DDX11/SSBP1/HNRNPA2B1/BRIP1/BLM/RUVBL1/RFC5/RUVBL2/DNA2/MCM5/RFC2/MCM6/ERCC6L/POLQ/HMGB2/CHTF18/DSCC1/RFC4/RAD51/MCM3/RFC3/RAD54L/MCM7/HMGA1/HMGB3/MCM4/MCM2/RECQL4/TOP2A
BP	GO:0032508	DNA duplex unwinding	102	-0.63301	-2.34199	1e-10	3.5039e-09	2.09342e-09	3458	tags=49%, list=18%, signal=41%	FANCM/WRN/ERCC2/G3BP1/ASCC3/DDB1/MNAT1/CHD1L/RAD54B/NBN/XRCC5/GTF2F2/RAD23B/CHD7/SUPV3L1/GTF2H3/DHX9/CUL4A/DDX1/PIF1/XRCC6/PARP1/WRNIP1/MCM8/DDX11/SSBP1/BRIP1/BLM/RUVBL1/RFC5/RUVBL2/DNA2/MCM5/RFC2/MCM6/ERCC6L/POLQ/CHTF18/DSCC1/RFC4/RAD51/MCM3/RFC3/RAD54L/MCM7/HMGA1/MCM4/MCM2/RECQL4/TOP2A
BP	GO:0032543	mitochondrial translation	130	-0.742037	-2.9125	1e-10	3.5039e-09	2.09342e-09	4105	tags=82%, list=21%, signal=66%	COA3/GATB/MRPL55/MRPL42/NDUFA7/WARS2/MRPL28/MRPL20/RMND1/OXA1L/CHCHD1/MRPL40/GFM2/MRPS31/MRPS24/GADD45GIP1/MRPS27/UQCC1/MRPL27/MRPS18C/GATC/MPV17L2/MALSU1/MTG2/MRPL51/MRPL35/MRPL22/NOA1/RPUSD4/DAP3/MRPL32/EARS2/MRPL24/FASTKD2/MRPL57/MRPS16/UQCC2/MRPS25/FASTKD3/MRPS33/MRRF/TACO1/RPUSD3/MRPL1/MRPS7/CDK5RAP1/MRPS23/TRUB2/MRPL30/MRPL52/MRPS30/MRPL9/MRPL41/QRSL1/MRPS10/MRPS15/MRPL21/MRPS22/MRPL45/MRPS…
BP	GO:0032970	regulation of actin filament-based process	364	0.550379	1.79499	1e-10	3.5039e-09	2.09342e-09	3406	tags=37%, list=17%, signal=31%	SYNPO2/LMOD1/PLN/CCL21/ELN/SFRP1/FLNA/FERMT2/CXCL12/JAM3/SVIL/S1PR1/CAV1/SYNPO/ATP1A2/MYOC/SLIT2/FAM107A/CFL2/TMOD1/CCL11/EPHA3/DIXDC1/GSN/PDGFRB/PDGFRA/CDC42EP3/TGFB3/PHLDB2/TPM1/LPAR1/DLC1/CCR7/CGNL1/ANK2/MYADM/RHOB/TEK/CACNA1C/LRP1/RGS4/RDX/EVL/CSF1R/ARHGEF15/EDN1/PDPN/KANK3/HCLS1/PAM/PDE4B/NRP1/ARHGDIB/WASF3/ASAP3/NCKAP1L/RGCC/PLEKHH2/RHOQ/GJA5/GMFG/GPM6B/DSTN/PFN2/ARHGAP6/ESAM/CYFIP2/CX3CL1/…
BP	GO:0033044	regulation of chromosome organization	258	-0.535954	-2.24313	1e-10	3.5039e-09	2.09342e-09	3996	tags=45%, list=20%, signal=37%	PHF19/RNF40/PCID2/UPF1/BRD7/PSMG2/RIF1/CTR9/NAF1/ANAPC7/CTCF/MAPKAPK5/CHTOP/SIRT6/FMR1/SPHK2/SNW1/MTF2/EXOSC10/SART3/CTBP1/MAD2L2/ACD/SRC/MNAT1/CDC23/ING2/PIH1D1/UBE2N/XRCC3/PINX1/NBN/AXIN2/LIF/XRCC5/SFPQ/CTNNB1/ANAPC1/ANAPC11/SMG5/NABP2/HNRNPU/SMARCB1/HNRNPC/ZBTB7B/RPS6KA4/HNRNPD/NELFE/HNRNPA1/PAXIP1/KDM1A/ZW10/PIF1/PARP1/GEN1/MYC/MAPK15/SPDL1/DDX11/NAA10/SSBP1/HNRNPA2B1/KNTC1/MUC1/CENPV/MAD2L1B…
BP	GO:0033108	mitochondrial respiratory chain complex assembly	88	-0.67845	-2.44584	1e-10	3.5039e-09	2.09342e-09	5631	tags=84%, list=29%, signal=60%	NDUFB7/SURF1/SDHAF2/NDUFC2/NDUFA13/OMA1/SCO1/NDUFB1/COA1/NDUFA5/SDHAF1/NDUFAF5/NDUFAF3/NDUFAF2/NDUFB5/NDUFV2/NDUFA2/ACAD9/TIMMDC1/SMIM20/PET117/ECSIT/COA3/NDUFAF6/COX17/NDUFB10/NDUFA7/COX16/OXA1L/NDUFB11/NDUFS5/NDUFS1/COX18/TTC19/NDUFS8/COX19/TMEM126A/C12orf73/SAMM50/NDUFS7/UQCC1/NDUFB2/NDUFAF4/NDUFB6/TMEM126B/NDUFC1/NDUFA12/NDUFB4/NDUFA10/TIMM21/UQCC2/NDUFA1/FASTKD3/TACO1/NDUFA9/TFAM/NDUFA8/NDUF…
BP	GO:0033260	nuclear DNA replication	58	-0.816045	-2.75495	1e-10	3.5039e-09	2.09342e-09	1168	tags=62%, list=6%, signal=59%	PRIM2/TIPIN/POLE/RPA3/POLD3/GINS3/BRCA2/DONSON/POLE3/PRIM1/RFC5/POLA2/POLD1/LIG1/DNA2/MCM5/RFC2/POLE2/CDC7/CHEK2/MCM6/GMNN/DBF4/RFC4/POLD2/RAD51/MCM3/RFC3/GINS1/PCNA/FEN1/MCM7/MCM4/CDC45/MCM2/CDT1
BP	GO:0034470	ncRNA processing	365	-0.650064	-2.80473	1e-10	3.5039e-09	2.09342e-09	4549	tags=63%, list=23%, signal=49%	MTFMT/MRPS11/INTS4/MDN1/ZCCHC4/ADAR/KTI12/RPS28/INTS12/TEX10/TUT1/ELP3/METTL2B/ERI3/TRMT5/RPS17/SHQ1/RPL35A/METTL15/METTL3/ZNHIT3/WDR36/RPF1/SIRT7/UTP3/TOE1/WDR55/NAF1/DDX51/RPP38/DDX27/RPS16/RTCB/FTSJ3/SART1/C9orf64/ELP6/INTS5/DROSHA/NOP10/NOP9/URB1/QTRT1/POP5/DUS2/RSL1D1/UTP20/METTL1/TSEN15/DIS3/TRPT1/TRIT1/ERCC2/MPHOSPH10/RCL1/EXOSC10/TP53RK/THUMPD2/TARBP1/TRMT10A/TRMT112/ELAC2/CLP1/XRN2/DDX52…
BP	GO:0034502	protein localization to chromosome	80	-0.678748	-2.43797	1e-10	3.5039e-09	2.09342e-09	2708	tags=51%, list=14%, signal=44%	PIH1D1/PINX1/CHAMP1/XRCC5/WRAP53/NABP2/MTBP/VCP/LRWD1/ZW10/MCM8/SPDL1/CENPQ/BRCA2/RCC2/CCT4/RAD21/CCT2/TCP1/MSH2/BUB3/CCT7/RUVBL2/CCT3/ZWILCH/CCT8/CCT5/ESCO2/CCT6A/GNL3/NDC80/DKC1/EZH2/TTK/BUB1B/CENPA/AURKB/CDK1/PLK1/CDT1/CDCA5
BP	GO:0034508	centromere complex assembly	37	-0.820604	-2.48582	1e-10	3.5039e-09	2.09342e-09	1208	tags=59%, list=6%, signal=56%	CENPL/CENPV/CENPK/CENPQ/NASP/CENPI/RUVBL1/NPM1/HELLS/CENPO/CENPN/CENPH/CENPW/CENPU/CENPE/MIS18A/OIP5/CENPM/DLGAP5/HJURP/CENPA/CENPF
BP	GO:0034660	ncRNA metabolic process	438	-0.644542	-2.85968	1e-10	3.5039e-09	2.09342e-09	5037	tags=65%, list=26%, signal=49%	NSUN6/DGCR8/PUS3/DTD1/INTS9/UTP23/MOCS3/NOL8/TRNT1/TRMT61B/KRI1/SARS2/SENP3/USP36/HENMT1/TSEN2/RPS24/RPS8/PLD6/CARS2/MTFMT/MRPS11/INTS4/MDN1/ZCCHC4/ADAR/KTI12/RPS28/INTS12/HARS2/TEX10/TUT1/ELP3/METTL2B/ERI3/TRMT5/RPS17/SHQ1/GATB/RPL35A/METTL15/DALRD3/METTL3/ZNHIT3/WDR36/RPF1/SIRT7/UTP3/WARS2/TOE1/WDR55/NAF1/DDX51/RPP38/DDX27/RPS16/RTCB/FTSJ3/MEPCE/SART1/C9orf64/ELP6/INTS5/DROSHA/NOP10/NOP9/URB1/Q…
BP	GO:0040013	negative regulation of locomotion	294	0.636831	2.05129	1e-10	3.5039e-09	2.09342e-09	2473	tags=38%, list=13%, signal=34%	APOD/SFRP2/GREM1/FBLN1/DPYSL3/PODN/CCL21/SFRP1/CYP1B1/DCN/IGFBP5/IL33/SERPINF1/THBS1/EMILIN1/CLDN5/PTN/CXCL12/MYOCD/COL3A1/SLIT2/DUSP1/MEOX2/SULF1/ATP2B4/CLIC4/MMRN2/MEF2C/CCL2/PHLDB2/TPM1/PTPRM/DLC1/THY1/PRKG1/RHOB/RECK/ATP1B2/GJA1/MCC/TIMP1/ROBO1/FGF2/CXCL13/TGFB1/TIE1/SEMA3G/LRP1/CD200/ENG/EVL/SEMA3C/LDLRAD4/SERPINE1/NR2F2/RRAS/GHRL/VCL/CITED2/MITF/SEMA6A/IGFBP3/ACVRL1/NRP1/ARHGDIB/MMP28/CX3CR…
BP	GO:0042254	ribosome biogenesis	283	-0.695842	-2.96504	1e-10	3.5039e-09	2.09342e-09	4150	tags=71%, list=21%, signal=57%	ZNF622/ERI3/RPS17/SHQ1/RPL35A/METTL15/ZNHIT3/WDR36/RPF1/RSL24D1/SIRT7/UTP3/PWP1/GTPBP10/MRPL20/SDAD1/WDR55/RPL38/RPS10/NAF1/DDX51/RPP38/DDX27/RPS16/FTSJ3/SART1/RPL23A/DROSHA/NOP10/NOP9/URB1/POP5/RSL1D1/UTP20/DIS3/EIF2A/ERCC2/MPHOSPH10/RCL1/EXOSC10/NMD3/TRMT112/RPS5/XRN2/DDX52/RPL24/ERI2/MPV17L2/RPS6/NOM1/MALSU1/MTG2/UTP15/IMP3/ESF1/MRPL22/HEATR3/UTP6/BMS1/RPUSD4/DDX10/PIH1D1/PELP1/RPL35/FASTKD2/E…
BP	GO:0042273	ribosomal large subunit biogenesis	68	-0.731373	-2.51027	1e-10	3.5039e-09	2.09342e-09	4562	tags=82%, list=23%, signal=64%	RPL3/MDN1/RPL6/ZNF622/RPL35A/ZNHIT3/RPF1/RSL24D1/MRPL20/SDAD1/RPL38/FTSJ3/RPL23A/URB1/RSL1D1/RPL24/MALSU1/HEATR3/RPL35/FASTKD2/TRAF7/MRPL1/RPL7/MAK16/GTF3A/DHX30/RPL14/PPAN/RPL7A/RPLP0/RPL26L1/DDX28/LAS1L/NHP2/DDX18/EIF6/WDR12/WDR74/RPF2/SURF6/GTPBP4/NIP7/PES1/MRTO4/RPL7L1/NIFK/NOP16/BRIX1/NLE1/NPM1/EBNA1BP2/PAK1IP1/NOC2L/NOP2/RRS1/BOP1
CC	GO:0042383	sarcolemma	131	0.691466	2.11119	1e-10	3.5039e-09	2.09342e-09	2492	tags=41%, list=13%, signal=36%	DES/SYNM/FLNC/PGM5/SGCA/SSPN/CAV1/LAMA2/COL6A2/BGN/ATP1A2/POPDC2/SGCE/AHNAK2/AQP1/SGCD/ATP2B4/KCNJ8/SYNC/COL6A3/TGFB3/CACNA2D1/BVES/DMD/SLC2A4/ANK2/VCAM1/CACNA1C/UTRN/AHNAK/RDX/COL6A1/KCND3/VCL/CACNB2/CAV2/FXYD1/SCN1B/DYSF/AKAP6/PDE9A/SLC8A1/CACNG4/KCNB1/SGCB/SNTA1/CASQ1/SLC8A2/ANXA1/CDH2/ITGB1/SLMAP/PPP3CB/RYR2
BP	GO:0042692	muscle cell differentiation	318	0.587929	1.90012	1e-10	3.5039e-09	2.09342e-09	2976	tags=33%, list=15%, signal=28%	MYH11/LMOD1/FLNC/GREM1/PGM5/RBPMS2/IGFBP5/PI16/BOC/FOXF1/JAM2/CACNA1H/TMEM119/MYOCD/EHD2/CSRP1/POPDC2/RAMP2/CFL2/COMP/TMOD1/KIT/EFEMP2/RGS2/DMPK/LDB3/IGF2/PDGFRB/MEF2C/PDGFRA/SPEG/TPM1/PLEKHO1/BVES/DMD/SMYD1/ACTC1/TMEM204/ANK2/BHLHE41/FGF10/ISL1/SYNE1/TGFB1/RGS4/FZD7/ENG/QKI/NFATC4/SORBS2/EDNRB/SMO/EDN1/CSRP2/SMARCD3/CD53/CDON/CAV2/IGF1/LOX/OBSL1/MEF2A/GPER1/RARB/DYSF/AKAP6/AVPR1A/ALPK3/BCL2/RBM2…
MF	GO:0043021	ribonucleoprotein complex binding	126	-0.616688	-2.40688	1e-10	3.5039e-09	2.09342e-09	3936	tags=58%, list=20%, signal=47%	DERL1/PQBP1/EEFSEC/GEMIN5/CPSF6/OXA1L/PRPF31/SPCS1/FMR1/EIF2A/MRPS27/NMD3/MALSU1/BAG6/EIF4H/SRP72/SRP68/DHX33/SRP54/ERI1/PRPF6/PIWIL1/SEC61A1/HNRNPU/MRRF/TACO1/SND1/UHMK1/PHF6/LARP1/SNRPD2/SRP9/TIMM50/YTHDF1/DHX9/ZNF598/EIF6/PRMT3/WDR12/NAA15/EIF2S1/GUF1/PTCD3/NAA10/ERAL1/PPIH/SNRPA/GEMIN4/HSPA5/ABCE1/PES1/EIF5AL1/RPN2/LETM1/MTIF2/PPP1CA/PRMT5/RPSA/EIF4A3/UNG/NPM1/CKAP5/OLA1/XPO5/EIF5A/C1QBP/SNRP…
BP	GO:0043062	extracellular structure organization	383	0.692514	2.25958	1e-10	3.5039e-09	2.09342e-09	2720	tags=48%, list=14%, signal=42%	MYH11/SFRP2/MFAP4/GREM1/CCDC80/FBLN1/SMOC2/COL14A1/ELN/CYP1B1/DCN/MFAP5/A2M/FBLN5/DPT/DDR2/COL8A1/FBLN2/AEBP1/LUM/FMOD/THBS1/EMILIN1/TNXB/TPSAB1/FOXF1/JAM2/JAM3/FBN1/ADAMTS1/ITGA7/TNC/TIMP2/MMP2/CRISPLD2/ANTXR1/CAV1/LAMA2/COL6A2/BGN/COL3A1/ITGA9/ITGA8/RAMP2/CTSK/COMP/COL8A2/SULF1/FOXF2/PECAM1/EFEMP2/ADAMTS8/FN1/COL10A1/PAPLN/VCAN/PDGFRA/COL15A1/COL6A3/LTBP3/LAMA4/COL1A2/PHLDB2/AGT/ECM2/VWF/ITGA1/…
CC	GO:0043235	receptor complex	402	0.566467	1.84685	1e-10	3.5039e-09	2.09342e-09	3729	tags=40%, list=19%, signal=33%	DDR2/EMILIN1/ITGA7/CD79A/GFRA1/ROR2/ITGA9/ITGA8/GABRP/FGFR1/RAMP2/RAMP1/EPHA3/KIT/CR2/ITGBL1/AXL/RAMP3/PDGFRB/PDGFRA/NRP2/GPBAR1/ITGA1/NPR1/TEK/CD36/CD79B/ITGA5/CALCRL/CSF2RB/EPHA7/IL6ST/TIE1/LRP1/GHR/GRIK5/TGFBR2/CHRNA3/ENG/TGFBR3/LY96/CRLF1/LEPR/ITLN1/CSF1R/ITGA11/ADRA2A/TRIL/NOTCH3/IL3RA/PLXNA4/PTPRB/ACVRL1/LIFR/ROR1/NRP1/DLG4/TRPC1/OSMR/PLXNC1/PLXDC1/SCIMP/APBB1IP/PLP1/ITGAM/LOXL4/TLR4/ITGAL/…
CC	GO:0043292	contractile fiber	228	0.692495	2.20156	1e-10	3.5039e-09	2.09342e-09	1567	tags=26%, list=8%, signal=25%	DES/MYH11/SYNPO2/LMOD1/SYNM/MYL9/FLNC/ACTA2/PGM5/PDLIM3/CRYAB/CALD1/FLNA/TPM2/PPP1R12B/NEXN/JPH2/CASQ2/FERMT2/PALLD/SVIL/MMP2/ARHGEF25/FBXO32/SYNPO/CSRP1/ABCC9/AHNAK2/CFL2/TMOD1/ATP2B4/KCNJ8/SYNC/LDB3/PDLIM4/PDLIM7/TPM1/DMD/ACTC1/ANK2/CACNA1C/FBXL22/SMPX/SYNE1/AHNAK/PARVA/SORBS2/FHL5/MYOM1/CSRP2/VCL/DST/PDE4B/OBSL1/FHL3/ACTN1/ILK/KCNA5/SLC8A1/KAT2B
BP	GO:0043410	positive regulation of MAPK cascade	498	0.51886	1.69837	1e-10	3.5039e-09	2.09342e-09	3675	tags=39%, list=19%, signal=32%	CCL19/CCL21/HAND2/AKAP12/IGFBP4/THBS1/FERMT2/IGFBP6/TIMP2/ROR2/FGFR1/CCL11/RASSF2/KIT/RAMP3/IGF2/PDGFRB/GPR183/PDGFRA/GPNMB/CCL2/TGFB3/GPBAR1/MDFIC/LPAR1/CSPG4/AGT/CXCR4/ITGA1/CCR7/TEK/CD36/F2R/TNFAIP8L3/FGF10/ROBO1/FGF2/PDGFD/IL34/TGFB1/LRP1/GHR/GADD45B/SH3RF3/C1QTNF1/FZD7/FZD4/DUSP5/GLIPR2/CSF1R/ADRA2A/GAS6/PTPRC/CD27/EDN1/GHRL/ACKR3/MAPK10/CDON/MAP3K3/BANK1/IGFBP3/ROR1/CAV2/NRP1/TREM2/PDGFC/LA…
BP	GO:0043487	regulation of RNA stability	188	-0.516751	-2.12118	1e-10	3.5039e-09	2.09342e-09	4033	tags=53%, list=20%, signal=42%	METTL3/PSMD4/PCID2/UPF1/PRKCD/ELAVL1/TAF15/PSMD6/NAF1/IGF2BP3/FMR1/HSPA8/DIS3/PSMD10/PSMD7/PSMF1/LARP4B/PSMC1/PSMB6/PSMD1/PSMA6/YTHDF2/PSMD8/PSMD5/PLEKHN1/PSMC3/PSMB10/AXIN2/FASTKD2/PSME1/HNRNPM/FASTK/PDE12/HNRNPR/YBX1/FASTKD3/HNRNPU/MEX3D/DXO/RBM10/LARP1/TNFSF13/EXOSC3/PSMD12/MOV10/HNRNPC/SYNCRIP/PSMC6/ANP32A/PSMB9/PAIP1/IGF2BP1/PSMC2/PSMB2/APEX1/HNRNPD/PSMB4/YTHDF1/PSMD13/FASTKD1/DDX49/PSMB1/EX…
CC	GO:0044391	ribosomal subunit	181	-0.643644	-2.63393	1e-10	3.5039e-09	2.09342e-09	5424	tags=75%, list=28%, signal=55%	MRPL34/MRPS36/NSUN4/RPS14/RPL5/RPS27A/HBA1/MRPL43/EIF2D/DDX3X/RPS20/RPL31/RPS24/RPS29/RPS8/MRPL38/RPL3/MRPS11/RPL6/RPS28/RPL9/RPL30/MRPL46/RPS11/RPL36/RPS3A/RPS13/RPL4/RPS17/RPL35A/MRPL55/RPL32/RPL41/RSL24D1/MRPL42/MRPL28/MRPL20/RPL38/RPS10/RPS12/RPS16/MRPL40/RPL23A/RPL18A/RPS26/MRPS31/MRPS24/RPS4X/EIF2A/MRPS27/MRPL27/RPS5/MRPS18C/RPL24/RPLP2/MPV17L2/RPS6/MALSU1/MRPL51/RPL37A/MRPL35/RPL36A/MRPL22…
BP	GO:0044786	cell cycle DNA replication	63	-0.808983	-2.75659	1e-10	3.5039e-09	2.09342e-09	1168	tags=62%, list=6%, signal=58%	PRIM2/TIPIN/POLE/RPA3/POLD3/GINS3/BRCA2/DONSON/POLE3/PRIM1/RFC5/FBXO5/POLA2/POLD1/LIG1/DNA2/MCM5/RFC2/POLE2/CDC7/CHEK2/MCM6/E2F7/GMNN/DBF4/RFC4/POLD2/E2F8/RAD51/MCM3/RFC3/GINS1/PCNA/FEN1/MCM7/MCM4/CDC45/MCM2/CDT1
BP	GO:0044839	cell cycle G2/M phase transition	264	-0.495443	-2.06717	1e-10	3.5039e-09	2.09342e-09	3245	tags=44%, list=16%, signal=38%	PSMD7/PSMF1/PSMC1/PSMB6/RAB11A/PSMD1/NEDD1/HAUS8/HAUS1/PSMA6/PSMD8/PSMD5/MNAT1/PSMC3/PSMB10/PINX1/TUBA4A/NBN/PSME1/PPP2R2A/USH1C/DNM2/HAUS5/DBF4B/CEP78/KHDRBS1/YWHAG/CDK5RAP3/HMGA2/CENPJ/NABP2/CDK7/AJUBA/PSMD12/CDK4/PPME1/PSMC6/PSMB9/ODF2/PSMC2/PSMB2/PSMB4/TUBB/ATAD5/PSMD13/PSMB1/RINT1/PAXIP1/PSMA7/HAUS6/NAE1/PSMD11/CDK2/PSMC4/CEP131/PSME3/PSMB7/PSMB3/PSMA4/PSMA5/PSMA3/PSMB5/CCND1/SSNA1/PSMD2/MAS…
BP	GO:0045229	external encapsulating structure organization	385	0.691897	2.25897	1e-10	3.5039e-09	2.09342e-09	2720	tags=48%, list=14%, signal=42%	MYH11/SFRP2/MFAP4/GREM1/CCDC80/FBLN1/SMOC2/COL14A1/ELN/CYP1B1/DCN/MFAP5/A2M/FBLN5/DPT/DDR2/COL8A1/FBLN2/AEBP1/LUM/FMOD/THBS1/EMILIN1/TNXB/TPSAB1/FOXF1/JAM2/JAM3/FBN1/ADAMTS1/ITGA7/TNC/TIMP2/MMP2/CRISPLD2/ANTXR1/CAV1/LAMA2/COL6A2/BGN/COL3A1/ITGA9/ITGA8/RAMP2/CTSK/COMP/COL8A2/SULF1/FOXF2/PECAM1/EFEMP2/ADAMTS8/FN1/COL10A1/PAPLN/VCAN/PDGFRA/COL15A1/COL6A3/LTBP3/LAMA4/COL1A2/PHLDB2/AGT/ECM2/VWF/ITGA1/…
BP	GO:0045333	cellular respiration	167	-0.566618	-2.30671	1e-10	3.5039e-09	2.09342e-09	4580	tags=60%, list=23%, signal=46%	UQCRB/SLC25A25/NDUFB5/IFNG/UCN/NDUFV2/NDUFA2/FAHD1/PARK7/MDH1/NDUFB10/NDUFA7/IDH3G/OXA1L/UQCRC2/NDUFB11/NDUFS5/NDUFS1/UQCRQ/IREB2/NDUFS8/COX7B/COQ9/NDUFS7/SDHD/NDUFB2/ACO2/NDUFB6/DGUOK/COX7A2L/NDUFC1/NDUFA12/COX10/NDUFB4/NOA1/COX4I1/NDUFA10/FXN/ETFA/COX15/COX6B1/NDUFA1/IDH3B/NDUFA9/SUCLG1/SDHB/SLC25A13/NDUFA8/NDUFAB1/VCP/GHITM/GPD2/NDUFA6/SUCLA2/IDH3A/DLD/UQCR10/NDUFS3/COX5B/NDUFB9/NDUFS2/COX6C/N…
BP	GO:0045765	regulation of angiogenesis	254	0.620045	1.98206	1e-10	3.5039e-09	2.09342e-09	2299	tags=37%, list=12%, signal=33%	HSPB6/SFRP2/THBS4/GREM1/PTGIS/SMOC2/SFRP1/CYP1B1/DCN/SERPINF1/THBS1/EMILIN1/CLDN5/PTN/ADAMTS1/ISM1/C3/THBS2/AKT3/RAMP2/AQP1/SULF1/CCL11/ATP2B4/RHOJ/APLNR/PRKCB/GPNMB/ENPP2/PTPRM/CXCR4/TNFSF12/NPR1/RHOB/TEK/RECK/SPARC/CD34/ITGA5/FGF2/VEGFC/HSPG2/ISL1/CXCL13/CDH5/TIE1/KLF2/ECSCR/TGFBR2/ENG/PPP1R16B/COL4A2/SERPINE1/RRAS/STAB1/HOXA5/PRKD1/GHRL/ETS1/SEMA6A/CX3CR1/ECM1/HGF/RGCC/C3AR1/TWIST1/C5AR1/CMA1/…
BP	GO:0045785	positive regulation of cell adhesion	410	0.545622	1.78193	1e-10	3.5039e-09	2.09342e-09	3822	tags=44%, list=19%, signal=37%	SFRP2/CCL19/CCDC80/CCL21/SFRP1/FLNA/COL8A1/FBLN2/SELP/LIMS2/EMILIN1/FERMT2/FOXF1/PTN/CXCL12/CAV1/MYOC/EFEMP2/FN1/IGF2/CCL2/TPM1/ECM2/ITPKB/NID1/CCR7/THY1/MYADM/TEK/CD36/SPOCK2/VCAM1/NR4A3/ITGA5/GLI3/ZBTB16/COL16A1/IL6ST/EDIL3/CXCL13/UTRN/LGALS1/TGFBR2/NDNF/EGR3/PTPRC/CD27/GLI2/RRAS/ADAM19/PDPN/ETS1/CITED2/FSTL3/SASH3/IL7R/HLA-DPB1/NRP1/LEF1/IGF1/AIF1/NCKAP1L/CHRD/ST3GAL4/FYN/APBB1IP/CX3CL1/ILK/SE…
BP	GO:0045930	negative regulation of mitotic cell cycle	292	-0.447697	-1.91628	1e-10	3.5039e-09	2.09342e-09	3347	tags=45%, list=17%, signal=38%	PSMD10/CNOT7/GADD45GIP1/BTG3/PSMD7/PSMF1/NME6/PSMC1/PSMB6/MAD2L2/PSMD1/PSMA6/PSMD8/PSMD5/CNOT3/PSMC3/RAD9A/PRCC/PSMB10/XRCC3/PINX1/CDKN2A/MDC1/NBN/PSME1/PIDD1/CTNNB1/CDK5RAP3/HMGA2/CDK2AP2/NABP2/CARM1/MTBP/CNOT10/CASP2/PSMD12/CDK4/TOM1L1/PSMC6/PSMB9/PSMC2/PSMB2/PSMB4/PSMD13/PSMB1/PTPN3/SLC9A3R1/RINT1/PSMA7/TRIAP1/AURKAIP1/PRMT1/ZW10/NAE1/PSMD11/CDK2/PSMC4/E2F4/GEN1/PSME3/PSMB7/DCLRE1B/SPDL1/PSMB3…
BP	GO:0046034	ATP metabolic process	266	-0.486157	-2.03994	1e-10	3.5039e-09	2.09342e-09	3657	tags=48%, list=19%, signal=39%	UQCRC2/NDUFB11/NDUFS5/ADPGK/ATP6V1A/NDUFS1/NUP133/UQCRQ/NDUFS8/COX7B/HSPA8/SPHK2/COQ9/NDUFS7/PFKL/SDHD/NDUFB2/NUP153/NDUFB6/DGUOK/COX7A2L/PGAM1/POM121/NDUFC1/NDUFA12/COX10/NDUFB4/COX4I1/NDUFA10/NUP93/FXN/NUP62/NUP98/COX15/PDE12/UQCC2/COX6B1/ABCD1/NDUFA1/SEC13/POM121C/NUP88/NUP160/NUP54/FOXK2/NDUFA9/NUDT5/NUP107/NUP43/SLC25A13/AAAS/NDUFA8/NDUFAB1/VCP/GHITM/NDUFA6/PFKFB4/NUDT2/DLD/HKDC1/GALK1/ALDOC…
BP	GO:0048285	organelle fission	450	-0.523909	-2.31056	1e-10	3.5039e-09	2.09342e-09	3223	tags=37%, list=16%, signal=32%	EML4/OPA1/NME6/SLC2A8/RAB11A/MAD2L2/PDXP/CHMP5/RPL24/CHMP2B/KATNB1/COX10/GPR3/LRP5/KIF2A/BAG6/RAD54B/CDC23/ING2/XRCC3/PINX1/CHAMP1/CHMP1A/SMC3/NUP62/LIF/PPP2R2A/DNM2/NUDC/ANAPC1/ANAPC11/HNRNPU/PDS5A/AAAS/MTBP/PSMC3IP/CCNB1IP1/SPIRE2/CCSAP/TOM1L1/KPNB1/MISP/PSMD13/MIEF1/BANF1/CALR/DRG1/AURKAIP1/P3H4/ZW10/HOXA13/GEN1/CCNE2/PHB2/MAPK15/SEH1L/SPDL1/NCAPH2/RMI1/MTFR1/NAA50/NAA10/KNTC1/CENPK/BRIP1/BRCA…
BP	GO:0048762	mesenchymal cell differentiation	218	0.603434	1.91602	1e-10	3.5039e-09	2.09342e-09	2618	tags=38%, list=13%, signal=33%	SFRP2/GREM1/SFRP1/FLNA/HAND2/FRZB/FERMT2/DACT3/TGFB1I1/HEYL/WWTR1/FGFR1/EPHA3/FOXF2/EDNRA/ANXA6/FN1/TMEM100/MEF2C/SIX2/NRP2/TGFB3/PHLDB2/TCF21/DAB2/FGF10/ISL1/TGFB1/SEMA3G/TGFBR2/ENG/TGFBR3/COL1A1/SEMA3C/LDLRAD4/EDNRB/GLIPR2/SMO/PHLDB1/EDN1/VASN/PDPN/SEMA6A/OLFM1/NRP1/SNAI2/LEF1/HGF/RGCC/SEMA6B/TWIST1/BCL2/NOTCH4/HTR2B/SPRY1/FOXC2/SEMA6D/SEMA6C/FAM172A/TGFBR1/SEMA3E/GATA3/TGFB2/SEMA5A/FUZ/RET/TIA…
BP	GO:0050657	nucleic acid transport	191	-0.565477	-2.29023	1e-10	3.5039e-09	2.09342e-09	4262	tags=58%, list=22%, signal=46%	DDX39B/SENP2/THOC7/IWS1/RBM15B/CPSF2/PCID2/UPF1/ENY2/SDAD1/CPSF6/IGF2BP3/CHTOP/NUP133/FMR1/NOP9/NMD3/MAGOHB/PABPN1/TOMM20/NUP153/POM121/THOC2/FIP1L1/AGFG1/SRSF6/NUP93/NUP62/NUP98/NCBP1/U2AF2/AHCTF1/SFPQ/RPS15/NCBP2/SEC13/KHDRBS1/POM121C/NUP88/YBX1/NUP160/NUP54/SMG5/SRSF3/HNRNPU/SMG7/RNPS1/NUP107/NUP43/UPF3B/AAAS/SRSF7/EIF4E/THOC6/LSG1/IGF2BP1/CPSF4/NUP62CL/HSF1/NUP155/HNRNPA1/POLR2D/MAGOH/XPOT/DH…
BP	GO:0050658	RNA transport	191	-0.565477	-2.29023	1e-10	3.5039e-09	2.09342e-09	4262	tags=58%, list=22%, signal=46%	DDX39B/SENP2/THOC7/IWS1/RBM15B/CPSF2/PCID2/UPF1/ENY2/SDAD1/CPSF6/IGF2BP3/CHTOP/NUP133/FMR1/NOP9/NMD3/MAGOHB/PABPN1/TOMM20/NUP153/POM121/THOC2/FIP1L1/AGFG1/SRSF6/NUP93/NUP62/NUP98/NCBP1/U2AF2/AHCTF1/SFPQ/RPS15/NCBP2/SEC13/KHDRBS1/POM121C/NUP88/YBX1/NUP160/NUP54/SMG5/SRSF3/HNRNPU/SMG7/RNPS1/NUP107/NUP43/UPF3B/AAAS/SRSF7/EIF4E/THOC6/LSG1/IGF2BP1/CPSF4/NUP62CL/HSF1/NUP155/HNRNPA1/POLR2D/MAGOH/XPOT/DH…
BP	GO:0050673	epithelial cell proliferation	370	0.54438	1.77521	1e-10	3.5039e-09	2.09342e-09	2582	tags=34%, list=13%, signal=30%	SFRP2/THBS4/SFRP1/IGFBP5/COL8A1/SERPINF1/FGF7/IGFBP4/THBS1/LIMS2/NGFR/PTN/CXCL12/CAV1/FGFR1/AKT3/VIP/COL8A2/SULF1/CCL11/KLF9/KIT/APLNR/IGF2/MEF2C/GPC3/CCL2/NRP2/GPBAR1/PTPRM/TNFSF12/TEK/SPARC/CD34/GLI1/NR4A3/GJA1/HTRA1/MCC/FGF10/ROBO1/FGF2/VEGFC/ISL1/TGFB1/TIE1/WFDC1/FZD7/TGFBR3/PPP1R16B/CYP7B1/SCG2/EDNRB/EGR3/NR2F2/SMO/CDKN1C/FAP/HOXA5/PRKD1/CD109/GHRL/NUPR1/AGTR1/IGFBP3/ACVRL1/CAV2/NRP1/BMP6/SN…
BP	GO:0050817	coagulation	328	0.557055	1.80276	1e-10	3.5039e-09	2.09342e-09	3769	tags=38%, list=19%, signal=31%	MYL9/FBLN1/FLNA/A2M/SELP/THBS1/SERPING1/F13A1/CAV1/EHD2/CSRP1/COL3A1/PRKAR2B/COMP/AXL/FN1/MMRN1/SERPINE2/PRKCB/PDGFRA/COL1A2/THBD/VWF/PRKG1/CD34/CD36/F2R/F2RL3/ITPR1/PRKACB/PROS1/C1QTNF1/DOCK11/COL1A1/F2RL2/SERPINE1/ADRA2A/GAS6/ZFPM2/EDN1/PLAT/FAP/EHD3/PDPN/ENTPD1/VCL/GNG2/VTN/TLN1/PEAR1/BLK/ST3GAL4/GNA14/FYN/ILK/WAS/TLR4/TFPI2/ITGB3/PIK3CG/P2RX1/APOE/DOCK8/TFPI/F8/TBXA2R/CD59/PRKCH/GATA3/PLCG2/T…
BP	GO:0050900	leukocyte migration	434	0.553757	1.80865	1e-10	3.5039e-09	2.09342e-09	3202	tags=41%, list=16%, signal=35%	APOD/THBS4/CCL19/GREM1/CCL21/IL33/SELP/THBS1/EMILIN1/JAM2/GYPC/PTN/CXCL12/JAM3/S1PR1/CAV1/CH25H/IL1R1/SLIT2/DUSP1/ROR2/CCL11/PECAM1/KIT/VPREB3/FN1/RARRES2/GPR183/CCL2/COL1A2/SDC2/SELL/THBD/CXCR4/ITGA1/CCR7/THY1/TEK/ATP1B2/CD34/CXCL14/MSN/VCAM1/ITGA5/VEGFC/PDGFD/PROS1/CXCL13/IL34/TGFB1/CD200/CHGA/CD48/CYP7B1/SCG2/COL1A1/EDNRB/CSF1R/SERPINE1/CAMK1D/GAS6/EDN1/L1CAM/PLVAP/PDE4B/MMP28/TREM2/CX3CR1/AIF…
BP	GO:0050920	regulation of chemotaxis	212	0.613371	1.94575	1e-10	3.5039e-09	2.09342e-09	3218	tags=45%, list=16%, signal=38%	THBS4/CCL19/GREM1/SMOC2/CCL21/THBS1/PTN/CXCL12/JAM3/S1PR1/SLIT2/DUSP1/FGFR1/PDGFRB/RARRES2/GPR183/PDGFRA/CCL2/LPAR1/CXCR4/CCR7/CXCL14/FGF10/ROBO1/FGF2/VEGFC/PDGFD/CXCL13/IL34/TGFB1/SEMA3G/SCG2/SEMA3C/CSF1R/SERPINE1/CAMK1D/GAS6/EDN1/PRKD1/PLXNA4/SEMA6A/NRP1/MMP28/TREM2/CCR4/AIF1/NCKAP1L/IL16/C3AR1/SEMA6B/C5AR1/CXCL17/RIN3/GPSM3/BST1/KDR/VEGFB/STAP1/SEMA6D/SEMA6C/SWAP70/SEMA3E/BMPR2/CMKLR1/SEMA5A/H…
BP	GO:0051028	mRNA transport	146	-0.584864	-2.30029	1e-10	3.5039e-09	2.09342e-09	4262	tags=58%, list=22%, signal=45%	DDX39B/SENP2/THOC7/IWS1/RBM15B/CPSF2/PCID2/UPF1/ENY2/IGF2BP3/CHTOP/NUP133/FMR1/MAGOHB/PABPN1/NUP153/POM121/THOC2/FIP1L1/AGFG1/SRSF6/NUP93/NUP62/NUP98/NCBP1/U2AF2/AHCTF1/NCBP2/SEC13/POM121C/NUP88/NUP160/NUP54/SMG5/SRSF3/SMG7/RNPS1/NUP107/NUP43/UPF3B/AAAS/SRSF7/EIF4E/THOC6/IGF2BP1/CPSF4/HSF1/NUP155/HNRNPA1/POLR2D/MAGOH/DHX9/SRSF2/CPSF3/NXT1/NUTF2/NXT2/NUP85/XPO1/SRSF9/ZC3H3/KHSRP/NUP35/SEH1L/THOC3/…
BP	GO:0051168	nuclear export	197	-0.589048	-2.38609	1e-10	3.5039e-09	2.09342e-09	4262	tags=60%, list=22%, signal=47%	DDX39B/THOC7/IWS1/XPO6/RBM15B/TP53/TCF7L2/PARK7/SIRT7/CPSF2/PCID2/UPF1/ENY2/GSK3B/SDAD1/CPSF6/CHTOP/NUP133/NOP9/EMD/DUSP16/DESI1/NMD3/MAGOHB/PABPN1/NUP153/STRADB/POM121/THOC2/FIP1L1/AGFG1/SRSF6/NUP93/NUP62/NUP98/NCBP1/U2AF2/XPO4/RPS15/NCBP2/SEC13/KHDRBS1/POM121C/NUP88/NUP160/NUP54/SMG5/SRSF3/SMG7/XPO7/RNPS1/NUP107/NUP43/UPF3B/UHMK1/AAAS/SRSF7/EIF4E/THOC6/LSG1/CPSF4/NUP62CL/RITA1/NUP155/HNRNPA1/PO…
BP	GO:0051169	nuclear transport	337	-0.435653	-1.90398	1e-10	3.5039e-09	2.09342e-09	4534	tags=51%, list=23%, signal=40%	NUP214/SHH/IPO7/POLDIP3/AKT1/IFNG/RBM8A/ZIC1/PPP1R10/DDX39B/SMN1/HDAC3/THOC7/IWS1/KPNA3/XPO6/RBM15B/TP53/TCF7L2/PARK7/SIRT7/CPSF2/PCID2/UPF1/PRKCD/ENY2/GSK3B/DDX20/ELAVL1/GEMIN5/SDAD1/CPSF6/PPP1CC/CHTOP/NUP133/NOP9/EMD/GEMIN6/DUSP16/DESI1/NMD3/MAGOHB/PABPN1/TNPO3/NUP153/STRADB/POM121/THOC2/HEATR3/FIP1L1/AGFG1/SRSF6/HTATIP2/NUP93/RSRC1/IPO4/GEMIN7/NUP62/GEMIN2/NUP98/NCBP1/U2AF2/XPO4/RPS15/NCBP2/SE…
BP	GO:0051216	cartilage development	173	0.675964	2.1189	1e-10	3.5039e-09	2.09342e-09	2748	tags=41%, list=14%, signal=36%	MGP/SFRP2/CHRDL2/GREM1/EFEMP1/HAND2/FRZB/LUM/BGN/ROR2/COMP/SULF1/ANXA6/EVC/MEF2C/PRRX1/SIX2/LTBP3/MAF/GLI3/ZBTB16/TIMP1/FGF2/TGFB1/TGFBR2/WNT9A/COL1A1/GLI2/EDN1/TGFBI/HOXA5/GHRL/WNT2B/NKX3-2/TRPS1/ACVRL1/CYTL1/BMP6/SNAI2/MATN3/PKD1/ECM1/BMP3/SCX/THBS3/RARB/RSPO2/HOXA3/NFIB/STC1/PKDCC/TGFBR1/PTHLH/BMPR2/SULF2/BMPR1B/CSGALNACT1/CHST11/CREB3L2/FGF18/NPPC/MEF2D/PTH1R/SMAD7/ADAMTS12/SNX19/NOG/SOX5/BMP…
BP	GO:0051236	establishment of RNA localization	194	-0.556632	-2.27171	1e-10	3.5039e-09	2.09342e-09	4262	tags=57%, list=22%, signal=45%	DDX39B/SENP2/THOC7/IWS1/RBM15B/CPSF2/PCID2/UPF1/ENY2/SDAD1/CPSF6/IGF2BP3/CHTOP/NUP133/FMR1/NOP9/NMD3/MAGOHB/PABPN1/TOMM20/NUP153/POM121/THOC2/FIP1L1/AGFG1/SRSF6/NUP93/NUP62/NUP98/NCBP1/U2AF2/AHCTF1/SFPQ/RPS15/NCBP2/SEC13/KHDRBS1/POM121C/NUP88/YBX1/NUP160/NUP54/SMG5/SRSF3/HNRNPU/SMG7/RNPS1/NUP107/NUP43/UPF3B/AAAS/SRSF7/EIF4E/THOC6/LSG1/IGF2BP1/CPSF4/NUP62CL/HSF1/NUP155/HNRNPA1/POLR2D/MAGOH/XPOT/DH…
BP	GO:0051271	negative regulation of cellular component movement	269	0.648102	2.07746	1e-10	3.5039e-09	2.09342e-09	2473	tags=38%, list=13%, signal=34%	APOD/SFRP2/GREM1/FBLN1/DPYSL3/PODN/CCL21/SFRP1/CYP1B1/DCN/IGFBP5/IL33/SERPINF1/THBS1/EMILIN1/CLDN5/PTN/CXCL12/MYOCD/COL3A1/SLIT2/DUSP1/MEOX2/SULF1/ATP2B4/CLIC4/MMRN2/MEF2C/CCL2/PHLDB2/TPM1/PTPRM/DLC1/THY1/PRKG1/RHOB/RECK/ATP1B2/GJA1/MCC/TIMP1/ROBO1/FGF2/CXCL13/TGFB1/TIE1/LRP1/CD200/ENG/TGFBR3/EVL/LDLRAD4/SERPINE1/NR2F2/RRAS/VCL/CITED2/MITF/IGFBP3/ACVRL1/ARHGDIB/MMP28/CX3CR1/AIF1/RGCC/CHRD/TNN/ACT…
BP	GO:0051304	chromosome separation	90	-0.65374	-2.36154	1e-10	3.5039e-09	2.09342e-09	1497	tags=37%, list=8%, signal=34%	ZW10/GEN1/MAPK15/SPDL1/NCAPH2/RMI1/KNTC1/MAD2L1BP/RAD21/FBXO5/BUB3/EME1/NDC80/CENPE/ESPL1/TACC3/TTK/BUB1B/DLGAP5/TRIP13/CENPF/CDC6/ZWINT/AURKB/PTTG1/BUB1/PLK1/MAD2L1/CCNB1/CDT1/TOP2A/UBE2C/CDC20
BP	GO:0051321	meiotic cell cycle	229	-0.530787	-2.19027	1e-10	3.5039e-09	2.09342e-09	2772	tags=30%, list=14%, signal=26%	BAG6/PDIK1L/RAD54B/ING2/SMC3/NBN/MSH6/LIF/STK35/PIWIL1/PSMC3IP/CCNB1IP1/SPIRE2/PSMD13/CALR/P3H4/ZW10/RBBP8/CDK2/RSPH1/CCNE2/MAPK15/NCAPH2/RMI1/BRIP1/BRCA2/NSUN2/RAD21/SMC1A/TUBG1/FBXO5/FIGNL1/BUB3/EME1/FANCD2/NCAPD3/XRCC2/OVOL1/INCENP/FANCA/NCAPD2/CDC25C/SMC4/CDC25B/SMC2/RAD51/EXO1/MND1/NDC1/KIF18A/ESPL1/RAD51AP1/RAD54L/NUF2/TTK/BUB1B/PKMYT1/CDC25A/CCNE1/TRIP13/CCNB2/PTTG1/BUB1/PLK1/NEK2/CKS2/AUR…
BP	GO:0051480	regulation of cytosolic calcium ion concentration	335	0.630074	2.04076	1e-10	3.5039e-09	2.09342e-09	3292	tags=41%, list=17%, signal=34%	PLN/CCL19/CCL21/JPH2/ADCY5/CASQ2/S1PR1/CAV1/ATP1A2/S1PR3/ATP2B4/EDNRA/PTGER1/MS4A1/RAMP3/APLNR/PDGFRA/CD52/LPAR1/CACNA2D1/PKD2/NCS1/CXCR4/DMD/CCR7/THY1/ANK2/CLIC2/CD36/F2R/GJA1/PTGER3/F2RL3/CACNA1C/FGF2/ITPR1/CXCL13/LRP1/C1QTNF1/KCNK3/F2RL2/EDNRB/PRNP/PTPRC/EDN1/P2RY8/GHRL/ACKR3/AGTR1/CACNB2/PTGFR/CNR1/CAV2/P2RY10/DLG4/PKD1/TRPC1/CX3CR1/CCR4/CYSLTR1/GPER1/C3AR1/PTGIR/FYN/PTGER2/C5AR1/CX3CL1/AKAP6…
BP	GO:0051983	regulation of chromosome segregation	83	-0.683811	-2.48079	1e-10	3.5039e-09	2.09342e-09	1497	tags=41%, list=8%, signal=38%	ZW10/RAD18/GEN1/MAPK15/SPDL1/KNTC1/RCC2/MAD2L1BP/RAD21/FBXO5/BUB3/RMI2/NDC80/CENPE/ESPL1/TACC3/TTK/BUB1B/DLGAP5/TRIP13/CENPF/CDC6/ZWINT/AURKB/PTTG1/BUB1/PLK1/MAD2L1/MKI67/KIF2C/CCNB1/CDT1/UBE2C/CDC20
BP	GO:0055074	calcium ion homeostasis	441	0.581933	1.90123	1e-10	3.5039e-09	2.09342e-09	3292	tags=37%, list=17%, signal=31%	PLN/CCL19/CCL21/JPH2/ADCY5/CASQ2/CXCL12/S1PR1/CAV1/ATP1A2/SLC24A3/S1PR3/CCL11/ATP2B4/EDNRA/ANXA6/PTGER1/MS4A1/RAMP3/DMPK/APLNR/PRKCB/PDGFRA/CD52/LPAR1/CACNA2D1/PKD2/NCS1/CXCR4/DMD/CCR7/THY1/ANK2/CLIC2/CD36/F2R/GJA1/PTGER3/F2RL3/CACNA1C/FGF2/ITPR1/CXCL13/CDH5/LRP1/C1QTNF1/KCNK3/F2RL2/EDNRB/PRNP/PTPRC/EDN1/P2RY8/GHRL/ACKR3/AGTR1/CACNB2/PTGFR/CNR1/CAV2/P2RY10/DLG4/PKD1/TRPC1/CX3CR1/CCR4/CYSLTR1/GPER…
BP	GO:0060047	heart contraction	265	0.599577	1.91847	1e-10	3.5039e-09	2.09342e-09	2328	tags=31%, list=12%, signal=27%	DES/PLN/HSPB7/FLNA/CASQ2/CACNA1H/GNAO1/FXYD6/CAV1/ABCC9/ATP1A2/POPDC2/SGCD/KCNE4/ATP2B4/KCNJ8/RGS2/DMPK/GSN/CELF2/TPM1/CACNA2D1/AGT/BVES/CXCR4/DMD/NPR1/ACTC1/ANK2/ATP1B2/CLIC2/GJA1/CHRM2/CACNA1C/ITPR1/ISL1/KCNH2/RGS4/CHGA/KCNK3/SCN4B/EDN1/KCND3/EHD3/GJC1/NPR2/CACNB2/EPAS1/PDE4B/TRPC1/FXYD1/MEF2A/GJA5/ATP2A3/SCN1B/AVPR1A/KCNA5/PIK3CG/SLC8A1/CACNG4/VEGFB/STC1/KCNE2/TAC1/TBX2/TGFB2/KCND1/GSTM2/THRB/…
BP	GO:0060485	mesenchyme development	274	0.619113	1.98917	1e-10	3.5039e-09	2.09342e-09	2618	tags=38%, list=13%, signal=33%	ACTG2/SFRP2/GREM1/ACTA2/SFRP1/FLNA/HAND2/FRZB/FERMT2/DACT3/FOXF1/TGFB1I1/HEYL/WWTR1/FGFR1/EPHA3/FOXF2/EDNRA/ANXA6/FN1/TMEM100/PDGFRB/MEF2C/SIX2/NRP2/TGFB3/PHLDB2/BASP1/PKD2/DCHS1/ACTC1/BNC2/TCF21/DAB2/FGF10/ROBO1/ISL1/TGFB1/SEMA3G/TGFBR2/ENG/TGFBR3/MEOX1/COL1A1/SEMA3C/LDLRAD4/EDNRB/GLIPR2/SMO/PHLDB1/ZFPM2/EDN1/VASN/HOXA5/PDPN/CITED2/SEMA6A/OLFM1/ACVRL1/NRP1/SNAI2/LEF1/HGF/RGCC/SCX/SEMA6B/TWIST1/B…
BP	GO:0060537	muscle tissue development	343	0.603722	1.95565	1e-10	3.5039e-09	2.09342e-09	2567	tags=31%, list=13%, signal=28%	MYH11/PLN/GREM1/MYLK/ELN/PGM5/DCN/IGFBP5/PI16/JPH2/MYOCD/ASB2/SVIL/S1PR1/CAV1/HEYL/CSRP1/POPDC2/CFL2/MEOX2/SGCD/EFEMP2/RGS2/HEG1/IGF2/PDGFRB/MEF2C/PDGFRA/TPM1/PKD2/BVES/SMYD1/ACTC1/TCF21/MSC/GLI1/GJA1/FGF2/ISL1/MEIS1/TGFB1/EGR1/RGS4/TGFBR2/FZD7/ENG/TGFBR3/SEMA3C/EGR2/SORBS2/NR2F2/SMO/VAMP5/MYOM1/ZFPM2/EDN1/CSRP2/GJC1/NUPR1/CDON/BTG2/CAV2/LEF1/HLF/IGF1/LOX/OBSL1/MEF2A/SCX/RBP4/TWIST1/RARB/PTCH1/AK…
BP	GO:0061448	connective tissue development	227	0.66112	2.10088	1e-10	3.5039e-09	2.09342e-09	2989	tags=42%, list=15%, signal=36%	MGP/SFRP2/CHRDL2/GREM1/ACTA2/EFEMP1/HAND2/FRZB/LUM/BGN/ROR2/COMP/SULF1/ANXA6/EVC/PDGFRB/MEF2C/PRRX1/SIX2/LTBP3/MAF/CD34/GLI3/ZBTB16/TIMP1/FGF2/PDGFD/TGFB1/COL5A1/EGR1/TGFBR2/WNT9A/COL1A1/GLI2/EDN1/TGFBI/SH3PXD2B/KLF7/HOXA5/GHRL/WNT2B/NKX3-2/TRPS1/ACVRL1/CYTL1/BMP6/SNAI2/MATN3/PKD1/LOX/ECM1/BMP3/SCX/THBS3/RARB/RSPO2/HOXA3/ARID5B/NFIB/FOXC2/STC1/PKDCC/TGFBR1/PTHLH/BMPR2/SULF2/BMPR1B/IL6R/CSGALNACT1…
BP	GO:0061564	axon development	493	0.532761	1.74462	1e-10	3.5039e-09	2.09342e-09	3958	tags=39%, list=20%, signal=32%	APOD/RGMA/FLNA/NEXN/NDN/MAP1B/BOC/NGFR/TSPAN2/SLIT3/PALLD/PTN/CXCL12/JAM3/NTN1/TNC/LAMA2/GFRA1/SLIT2/MAP1A/CDH11/EPHA3/FN1/VSTM2L/PDLIM7/NRP2/NFASC/PTPRM/APBB1/CXCR4/THY1/PTPRS/GLI3/ROBO1/ISL1/EPHA7/NTN4/SEMA3G/LRP1/NRXN3/EVL/MAP6/SEMA3C/EGR2/CSF1R/SMO/GLI2/KLF7/NREP/NOTCH3/PLXNA4/L1CAM/VCL/FEZ1/CNR1/SEMA6A/DCLK1/OLFM1/NRP1/PLA2G10/DOK5/CRABP2/NCAM1/CNTN4/PLXNC1/FLRT2/CHN1/CRMP1/TNN/MACF1/UST/SEM…
CC	GO:0062023	collagen-containing extracellular matrix	415	0.742535	2.42444	1e-10	3.5039e-09	2.09342e-09	2575	tags=46%, list=13%, signal=41%	MGP/OGN/SFRP2/THBS4/MFAP4/PRELP/SPARCL1/GREM1/SPON1/CCDC80/FBLN1/SMOC2/COL14A1/PODN/ELN/SFRP1/EFEMP1/SOD3/DCN/ABI3BP/MFAP5/A2M/SRPX/ASPN/FBLN5/DPT/CLU/COL8A1/ANGPTL1/CPA3/SERPINF1/LTBP1/SSC5D/FBLN2/AEBP1/LUM/OMD/FMOD/THBS1/EMILIN1/TNXB/TPSAB1/SERPING1/IGFBP7/TPSB2/CILP/F13A1/PTN/FGL2/SCARA3/CXCL12/TGFB1I1/FBN1/ADAMTS1/LTBP2/NTN1/TNC/TIMP2/MMP2/ANGPTL2/LAMA2/THBS2/COL6A2/BGN/CLEC3B/COL3A1/MYOC/TIM…
BP	GO:0065004	protein-DNA complex assembly	164	-0.560313	-2.2794	1e-10	3.5039e-09	2.09342e-09	3297	tags=43%, list=17%, signal=36%	ERCC2/SART3/BRD2/RBBP4/RBBP7/NAP1L4/DDB1/MIS18BP1/MNAT1/POLR1E/CHD1L/IPO4/PSMC3/PIH1D1/HIRA/CDK7/DAXX/RAD23B/ITGB3BP/SMARCB1/PSMC6/PSMC2/SMARCA4/HAT1/GTF2A2/GTF2H3/CUL4A/PSMC4/PARP1/HMGB1/ANP32B/CENPL/RPA3/CENPV/CENPK/CENPQ/NASP/CENPI/RUVBL1/SOX9/NPM1/HELLS/SET/CENPO/MCM5/MCM6/CHAF1A/HMGB2/CENPN/CHAF1B/CENPH/GMNN/CENPW/RAD51/CENPU/CENPE/MIS18A/MCM3/OIP5/MCM7/CENPM/DLGAP5/MCM4/CDC45/HJURP/CENPA/CE…
BP	GO:0070125	mitochondrial translational elongation	87	-0.754573	-2.72923	1e-10	3.5039e-09	2.09342e-09	4004	tags=84%, list=20%, signal=67%	MRPL55/MRPL42/MRPL28/MRPL20/OXA1L/CHCHD1/MRPL40/MRPS31/MRPS24/GADD45GIP1/MRPS27/MRPL27/MRPS18C/MRPL51/MRPL35/MRPL22/DAP3/MRPL32/MRPL24/MRPL57/MRPS16/MRPS25/MRPS33/MRPL1/MRPS7/MRPS23/MRPL30/MRPL52/MRPS30/MRPL9/MRPL41/MRPS10/MRPS15/MRPL21/MRPS22/MRPL45/MRPS18B/MRPS28/AURKAIP1/TSFM/GFM1/MRPL48/MRPL19/MRPL49/MRPS9/MRPS18A/MRPL17/TUFM/MRPL16/PTCD3/MRPL36/MRPL50/MRPS35/MRPL39/MRPL18/MRPL11/MRPL44/MRPS3…
BP	GO:0070126	mitochondrial translational termination	88	-0.744884	-2.68533	1e-10	3.5039e-09	2.09342e-09	4004	tags=82%, list=20%, signal=65%	MRPL55/MRPL42/MRPL28/MRPL20/OXA1L/CHCHD1/MRPL40/GFM2/MRPS31/MRPS24/GADD45GIP1/MRPS27/MRPL27/MRPS18C/MRPL51/MRPL35/MRPL22/DAP3/MRPL32/MRPL24/MRPL57/MRPS16/MRPS25/MRPS33/MRRF/MRPL1/MRPS7/MRPS23/MRPL30/MRPL52/MRPS30/MRPL9/MRPL41/MRPS10/MRPS15/MRPL21/MRPS22/MRPL45/MRPS18B/MRPS28/AURKAIP1/MRPL48/MRPL19/MRPL49/MRPS9/MRPS18A/MRPL17/MRPL16/PTCD3/MRPL36/MRPL50/MRPS35/MRPL39/MRPL18/MRPL11/MRPL44/MRPS34/ERA…
BP	GO:0071103	DNA conformation change	266	-0.587874	-2.46676	1e-10	3.5039e-09	2.09342e-09	3496	tags=46%, list=18%, signal=38%	SIRT6/CDAN1/FANCM/WRN/ERCC2/G3BP1/SART3/BRD2/RBBP4/ASCC3/RBBP7/NAP1L4/DDB1/MIS18BP1/MNAT1/CHD1L/IPO4/RAD54B/CDKN2A/CHMP1A/NBN/PARP10/HIRA/XRCC5/PIWIL1/HMGA2/LIN54/GTF2F2/DAXX/RAD23B/ITGB3BP/CHD7/SUPV3L1/HAT1/GTF2H3/BANF1/DHX9/CUL4A/DDX1/PIF1/XRCC6/PARP1/WRNIP1/HMGB1/ANP32B/MCM8/CENPL/NCAPH2/BEND3/HDAC1/DDX11/NAA10/SSBP1/HNRNPA2B1/CENPV/CENPK/CENPQ/BRIP1/NASP/DNMT1/TRIM28/CENPI/BLM/TOP1/RUVBL1/POL…
BP	GO:0071166	ribonucleoprotein complex localization	128	-0.681506	-2.66313	1e-10	3.5039e-09	2.09342e-09	4953	tags=72%, list=25%, signal=54%	SRRM1/TPR/SYMPK/DHX38/THOC1/NUP214/POLDIP3/RBM8A/DDX39B/THOC7/IWS1/RBM15B/CPSF2/PCID2/UPF1/ENY2/SDAD1/PRPF31/CHTOP/NUP133/NOP9/NMD3/MAGOHB/PABPN1/NUP153/POM121/THOC2/FIP1L1/AGFG1/SRSF6/NUP93/NUP62/NUP98/NCBP1/U2AF2/RPS15/NCBP2/SEC13/POM121C/NUP88/NUP160/NUP54/SMG5/SRSF3/SMG7/RNPS1/NUP107/NUP43/UPF3B/AAAS/SRSF7/EIF4E/THOC6/LSG1/CPSF4/NUP155/POLR2D/MAGOH/XPOT/SSB/SRSF2/CPSF3/NXT1/EIF6/NUP85/XPO1/LT…
BP	GO:0071426	ribonucleoprotein complex export from nucleus	127	-0.681012	-2.67512	1e-10	3.5039e-09	2.09342e-09	4953	tags=72%, list=25%, signal=54%	SRRM1/TPR/SYMPK/DHX38/THOC1/NUP214/POLDIP3/RBM8A/DDX39B/THOC7/IWS1/RBM15B/CPSF2/PCID2/UPF1/ENY2/SDAD1/CHTOP/NUP133/NOP9/NMD3/MAGOHB/PABPN1/NUP153/POM121/THOC2/FIP1L1/AGFG1/SRSF6/NUP93/NUP62/NUP98/NCBP1/U2AF2/RPS15/NCBP2/SEC13/POM121C/NUP88/NUP160/NUP54/SMG5/SRSF3/SMG7/RNPS1/NUP107/NUP43/UPF3B/AAAS/SRSF7/EIF4E/THOC6/LSG1/CPSF4/NUP155/POLR2D/MAGOH/XPOT/SSB/SRSF2/CPSF3/NXT1/EIF6/NUP85/XPO1/LTV1/SRSF…
BP	GO:0071427	mRNA-containing ribonucleoprotein complex export from nucleus	110	-0.669743	-2.544	1e-10	3.5039e-09	2.09342e-09	4953	tags=69%, list=25%, signal=52%	SRRM1/TPR/SYMPK/DHX38/THOC1/NUP214/POLDIP3/RBM8A/DDX39B/THOC7/IWS1/RBM15B/CPSF2/PCID2/UPF1/ENY2/CHTOP/NUP133/MAGOHB/PABPN1/NUP153/POM121/THOC2/FIP1L1/AGFG1/SRSF6/NUP93/NUP62/NUP98/NCBP1/U2AF2/NCBP2/SEC13/POM121C/NUP88/NUP160/NUP54/SMG5/SRSF3/SMG7/RNPS1/NUP107/NUP43/UPF3B/AAAS/SRSF7/EIF4E/THOC6/CPSF4/NUP155/POLR2D/MAGOH/SRSF2/CPSF3/NXT1/NUP85/SRSF9/NUP35/SEH1L/THOC3/CPSF1/HNRNPA2B1/NUP50/SRSF1/RAE…
BP	GO:0071559	response to transforming growth factor beta	243	0.612511	1.95748	1e-10	3.5039e-09	2.09342e-09	2433	tags=35%, list=12%, signal=31%	SFRP1/ASPN/LTBP1/FMOD/THBS1/EMILIN1/FERMT2/CLDN5/CILP/MYOCD/TGFB1I1/FBN1/LTBP2/LRRC32/CAV1/CLEC3B/COL3A1/PDE3A/HTRA3/MEF2C/LTBP3/COL1A2/TGFB3/SMAD9/LTBP4/DKK3/DAB2/NR3C1/HTRA1/PDE2A/PDGFD/CDH5/TGFB1/TGFBR2/ENG/TGFBR3/COL4A2/COL1A1/LDLRAD4/POSTN/EDN1/CDKN1C/PEG10/VASN/NREP/CD109/HPGD/CITED2/ACVRL1/CAV2/CX3CR1/LOX/MXRA5/SCX/FYN/TWSG1/CDKN2B/SPRY1/NRROS/FNDC4/LATS2/GDF10/TGFBR1/TGFB2/ZMIZ1/JUN/ZFP36…
BP	GO:0071560	cellular response to transforming growth factor beta stimulus	237	0.611906	1.95509	1e-10	3.5039e-09	2.09342e-09	2433	tags=34%, list=12%, signal=30%	SFRP1/ASPN/LTBP1/FMOD/THBS1/EMILIN1/FERMT2/CLDN5/CILP/MYOCD/TGFB1I1/FBN1/LTBP2/LRRC32/CAV1/CLEC3B/COL3A1/PDE3A/HTRA3/MEF2C/LTBP3/COL1A2/TGFB3/SMAD9/LTBP4/DKK3/DAB2/NR3C1/HTRA1/PDE2A/PDGFD/CDH5/TGFB1/TGFBR2/ENG/TGFBR3/COL4A2/COL1A1/LDLRAD4/POSTN/EDN1/CDKN1C/PEG10/VASN/NREP/CD109/HPGD/CITED2/ACVRL1/CAV2/CX3CR1/LOX/SCX/FYN/TWSG1/CDKN2B/SPRY1/NRROS/LATS2/GDF10/TGFBR1/TGFB2/ZMIZ1/JUN/ZFP36L1/PENK/ZYX/…
BP	GO:0071824	protein-DNA complex subunit organization	203	-0.54669	-2.22066	1e-10	3.5039e-09	2.09342e-09	3297	tags=48%, list=17%, signal=41%	VPS72/RBX1/RPA1/DDB2/PSME4/CAND1/RRN3/TAF11/TP53/RPA2/TBP/SPTY2D1/CTCF/GRWD1/ACTR6/BRF2/ERCC2/SART3/ZNHIT1/BRD2/RBBP4/RBBP7/NAP1L4/DDB1/SMARCD1/MIS18BP1/MNAT1/POLR1E/CHD1L/IPO4/PSMC3/PIH1D1/HIRA/PIWIL1/NFE2/LIN54/CDK7/DAXX/RAD23B/ITGB3BP/SUPT16H/SMARCB1/PSMC6/PSMC2/SMARCA4/HAT1/GTF2A2/GTF2H3/CUL4A/SMARCC1/PSMC4/PARP1/MYC/HMGB1/ANP32B/CENPL/RPA3/CENPV/CENPK/CENPQ/SMARCD2/NASP/CENPI/RUVBL1/POLE3/SO…
BP	GO:0071826	ribonucleoprotein complex subunit organization	189	-0.616969	-2.52079	1e-10	3.5039e-09	2.09342e-09	4684	tags=66%, list=24%, signal=51%	PRPF3/ATR/PRPF39/EIF3C/RPL3/MRPS11/MDN1/ADAR/RPL6/RPS28/KIF5B/ISY1/DDX39B/SMN1/CDC73/SHQ1/CRNKL1/ZNHIT3/RSL24D1/DDX20/SF3A3/GEMIN5/MRPL20/SF1/RPL38/RPS10/NAF1/CPSF6/CPSF7/EIF5/PRPF31/SART1/RPL23A/SRSF10/TAF9/GEMIN6/SART3/RPS5/CLP1/EIF3H/RPL24/EIF3A/NUDT21/SRSF6/EIF3J/EIF4H/PIH1D1/GEMIN7/DDX23/RBMX/FASTKD2/TXNL4A/GEMIN2/PRPF6/XRCC5/NCBP1/COIL/TRAF7/RPS15/MRPS7/DHX30/DENR/EIF3D/PPAN/VCP/SF3A2/NUFIP…
BP	GO:0072001	renal system development	287	0.577552	1.85593	1e-10	3.5039e-09	2.09342e-09	2583	tags=32%, list=13%, signal=28%	GREM1/ACTA2/SFRP1/DCN/SERPINF1/FOXF1/MYOCD/FBN1/ADAMTS1/KANK2/TNS2/HEYL/WWTR1/SLIT2/ITGA8/SULF1/PECAM1/KCNJ8/BICC1/PDGFRB/MEF2C/PDGFRA/GPC3/SIX2/AGT/BASP1/PKD2/DCHS1/NID1/TEK/TCF21/CD34/FGF10/GLI3/ZBTB16/GLIS2/FGF2/EPHA7/PDGFD/EGR1/FAT4/NFIA/PBX1/CRLF1/SOX17/SMO/GLI2/COL4A4/HPGD/AGTR1/WNT2B/FSTL3/BMP6/PKD1/LRRK2/RBP4/RARB/PYGO1/PTCH1/BCL2/MTSS1/LAMB2/ARID5B/SPRY1/VANGL2/FOXC2/EPHA4/ANGPT1/ID3/COL…
BP	GO:0072503	cellular divalent inorganic cation homeostasis	466	0.563767	1.84429	1e-10	3.5039e-09	2.09342e-09	3292	tags=35%, list=17%, signal=30%	PLN/CCL19/CCL21/JPH2/ADCY5/CASQ2/CXCL12/S1PR1/CAV1/ATP1A2/SLC24A3/S1PR3/CCL11/ATP2B4/EDNRA/ANXA6/PTGER1/MS4A1/RAMP3/DMPK/APLNR/PRKCB/PDGFRA/CD52/LPAR1/CACNA2D1/PKD2/NCS1/CXCR4/DMD/CCR7/THY1/ANK2/CLIC2/CD36/F2R/GJA1/PTGER3/F2RL3/CACNA1C/FGF2/ITPR1/CXCL13/CDH5/LRP1/C1QTNF1/KCNK3/F2RL2/EDNRB/PRNP/PTPRC/EDN1/P2RY8/GHRL/ACKR3/AGTR1/CACNB2/PTGFR/CNR1/CAV2/P2RY10/DLG4/PKD1/TRPC1/CX3CR1/CCR4/CYSLTR1/GPER…
BP	GO:0072507	divalent inorganic cation homeostasis	484	0.556358	1.82025	1e-10	3.5039e-09	2.09342e-09	3292	tags=35%, list=17%, signal=30%	PLN/CCL19/CCL21/JPH2/ADCY5/CASQ2/CXCL12/S1PR1/CAV1/ATP1A2/SLC24A3/S1PR3/CCL11/ATP2B4/EDNRA/ANXA6/PTGER1/MS4A1/RAMP3/DMPK/APLNR/PRKCB/PDGFRA/CD52/LPAR1/CACNA2D1/PKD2/NCS1/CXCR4/DMD/CCR7/THY1/ANK2/CLIC2/CD36/F2R/GJA1/PTGER3/F2RL3/CACNA1C/FGF2/ITPR1/CXCL13/CDH5/LRP1/C1QTNF1/KCNK3/F2RL2/EDNRB/PRNP/PTPRC/EDN1/P2RY8/GHRL/ACKR3/AGTR1/CACNB2/PTGFR/CNR1/CAV2/P2RY10/DLG4/PKD1/TRPC1/CX3CR1/CCR4/CYSLTR1/GPER…
BP	GO:0090092	regulation of transmembrane receptor protein serine/threonine kinase signaling pathway	235	0.604047	1.92847	1e-10	3.5039e-09	2.09342e-09	2625	tags=32%, list=13%, signal=28%	SFRP2/SFRP4/GREM1/CHRDL1/SFRP1/RBPMS2/ASPN/LTBP1/GREM2/THBS1/EMILIN1/CILP/MYOCD/TGFB1I1/FBN1/FSTL1/CAV1/RBPMS/SULF1/HTRA3/GPC3/TGFB3/LTBP4/DKK3/ZNF423/DAB2/HTRA1/FGF10/CDH5/TGFB1/TGFBR2/ENG/TGFBR3/LDLRAD4/CDKN1C/PEG10/VASN/NREP/CD109/CITED2/FSTL3/ACVRL1/CAV2/BMP6/INHBA/LOX/BMP3/CHRD/TWSG1/CDKN2B/SPRY1/NRROS/LATS2/GDF10/TGFBR1/BMPR2/CRIM1/TGFB2/NOTCH2/ADAMTSL2/CHST11/SFRP5/PMEPA1/MAGI2/SKIL/HSPA1A…
BP	GO:0090101	negative regulation of transmembrane receptor protein serine/threonine kinase signaling pathway	124	0.68514	2.08292	1e-10	3.5039e-09	2.09342e-09	2556	tags=37%, list=13%, signal=32%	SFRP2/GREM1/CHRDL1/SFRP1/RBPMS2/ASPN/LTBP1/GREM2/EMILIN1/CILP/TGFB1I1/FBN1/CAV1/HTRA3/TGFB3/HTRA1/TGFB1/TGFBR2/TGFBR3/LDLRAD4/PEG10/VASN/CD109/FSTL3/CAV2/CHRD/TWSG1/SPRY1/NRROS/TGFBR1/CRIM1/ADAMTSL2/CHST11/PMEPA1/MAGI2/SKIL/HSPA1A/SMAD7/PBLD/ACVR1/SKI/RASL11B/NBL1/BMPER/NOG/DKK1
BP	GO:0090130	tissue migration	290	0.5722	1.842	1e-10	3.5039e-09	2.09342e-09	2600	tags=38%, list=13%, signal=33%	ACTG2/GREM1/ACTA2/SMOC2/CYP1B1/DCN/SERPINF1/FGF7/THBS1/FOXF1/PTN/KANK2/FSTL1/SLIT2/FGFR1/AKT3/MEOX2/ATP2B4/KIT/MMRN2/RHOJ/CLEC14A/MEF2C/NRP2/ENPP2/PTPRM/AGT/TNFSF12/ACTC1/RHOB/TEK/SPARC/SRPX2/MCC/FGF10/ZEB2/ROBO1/FGF2/VEGFC/CXCL13/CDH5/TGFB1/TGFBR2/EVL/SCG2/GLIPR2/EGR3/NR2F2/EDN1/RRAS/SOX18/FAP/PRKD1/ETS1/MAP3K3/ACVRL1/NRP1/RGCC/MAPRE2/MACF1/PFN2/ITGB3/ATOH8/PIK3CG/SASH1/APOE/PIK3CD/ARSB/TBXA2R/K…
BP	GO:0090257	regulation of muscle system process	215	0.619047	1.96524	1e-10	3.5039e-09	2.09342e-09	2584	tags=32%, list=13%, signal=28%	HSPB6/CNN1/PLN/MYL9/HAND2/IGFBP5/PPP1R12B/TACR2/PI16/KCNMA1/CASQ2/SGCA/MYOCD/CAV1/FBXO32/ATP1A2/ATP2B4/KIT/ANXA6/RGS2/DMPK/TPM1/AGT/DMD/PRKG1/ANK2/CLIC2/F2R/NR4A3/CHRM2/CALCRL/CACNA1C/IL6ST/UTRN/RGS4/CHRNA3/CHGA/ADRA2A/EDN1/EHD3/GHRL/PDE4B/IGF1/MEF2A/GJA5/GPER1/LMCD1/AKAP6/PIK3CG/P2RX1/PDE9A/TBXA2R/SLC8A1/STC1/ADRB2/PTAFR/GSTM2/NOS3/PDE4D/CASQ1/SMAD7/CTNNA3/CAMK2G/DAPK3/RYR2/TACR1/FOXO1/ERRFI1/DO…
BP	GO:0090287	regulation of cellular response to growth factor stimulus	262	0.639451	2.04541	1e-10	3.5039e-09	2.09342e-09	2450	tags=35%, list=12%, signal=31%	SFRP2/SFRP4/GREM1/SMOC2/CHRDL1/SFRP1/DCN/RBPMS2/ASPN/LTBP1/GREM2/THBS1/EMILIN1/NGFR/MYOCD/TGFB1I1/FBN1/FSTL1/CAV1/SLIT2/FGFR1/SULF1/ATP2B4/HTRA3/MMRN2/PRKCB/GPC3/TGFB3/AGT/LTBP4/DKK3/TMEM204/ZNF423/DAB2/HTRA1/ITGA5/FGF10/ROBO1/FGF2/VEGFC/CXCL13/CDH5/TGFB1/TGFBR2/ENG/TGFBR3/FZD4/LDLRAD4/SHISA2/CDKN1C/PEG10/VASN/NREP/CD109/CITED2/VTN/FSTL3/SEMA6A/ACVRL1/CAV2/DOK5/LOX/CHRD/TWSG1/HHIP/ITGB3/CDKN2B/SP…
BP	GO:0090305	nucleic acid phosphodiester bond hydrolysis	285	-0.514853	-2.19683	1e-10	3.5039e-09	2.09342e-09	4347	tags=47%, list=22%, signal=37%	TUT1/RBX1/MUS81/RPA1/ANGEL1/DDB2/CNOT1/PNKP/ERI3/RFC1/RAD1/CPSF2/RPA2/CNOT6/DCPS/EDC4/TOE1/POLR2I/DFFB/CPSF6/CPSF7/RPP38/FANCM/DROSHA/WRN/NOP9/POP5/UTP20/TSEN15/DIS3/CNOT7/ERCC2/RCL1/G3BP1/PPP1R8/EXOSC10/ELAC2/DBR1/XRN2/ERI2/NUDT21/TATDN1/DDB1/REXO1/LACTB2/RPP21/FIP1L1/CHD1L/BMS1/RAD9A/NTHL1/ERI1/NCBP1/RRP36/PDE12/STK31/NCBP2/POP4/PIWIL1/APEX2/TSEN34/HELZ2/TSR1/SND1/DXO/RPS21/EXOSC3/TDP1/CSTF3/AG…
BP	GO:0090501	RNA phosphodiester bond hydrolysis	148	-0.550063	-2.17041	1e-10	3.5039e-09	2.09342e-09	4148	tags=51%, list=21%, signal=41%	CNOT1/ERI3/CPSF2/CNOT6/DCPS/TOE1/POLR2I/CPSF6/CPSF7/RPP38/DROSHA/NOP9/POP5/UTP20/DIS3/CNOT7/RCL1/PPP1R8/EXOSC10/ELAC2/DBR1/XRN2/ERI2/NUDT21/LACTB2/RPP21/FIP1L1/BMS1/ERI1/NCBP1/RRP36/PDE12/NCBP2/POP4/PIWIL1/TSEN34/HELZ2/TSR1/SND1/RPS21/EXOSC3/CSTF3/AGO2/MOV10/ISG20L2/CPSF4/APEX1/NHP2/ABT1/EXOSC7/CPSF3/EXOSC9/TBL3/NOB1/RPP40/TSN/EXOSC2/MRPL44/CPSF1/POP1/NOP14/EXOSC5/POLR3K/PNPT1/EXOSC8/EXOSC4/ENDOG…
CC	GO:0098687	chromosomal region	301	-0.649025	-2.7999	1e-10	3.5039e-09	2.09342e-09	2657	tags=45%, list=13%, signal=40%	XRCC3/PINX1/CHAMP1/SMC3/NBN/NUP98/NLRP2/XRCC5/AHCTF1/NGDN/SEC13/NUP160/WRAP53/NABP2/HNRNPU/DAXX/PDS5A/NUP107/NUP43/PHF6/ITGB3BP/MTBP/LRWD1/THOC6/HSF1/APEX1/NHP2/HAT1/SSB/KDM1A/ZW10/PIF1/DOT1L/XRCC6/PARP1/NUP85/WRNIP1/XPO1/ORC5/DCLRE1B/SEH1L/CENPL/SPDL1/THOC3/PTGES3/HNRNPA2B1/KNTC1/SUV39H2/PRKDC/CENPV/CENPK/CENPQ/BRCA2/RCC2/CENPI/BLM/PPP1CA/RAD21/SMC1A/NAT10/GAR1/CBX3/RANGAP1/MSH2/CKAP5/MEN1/HELLS…
CC	GO:0098798	mitochondrial protein-containing complex	224	-0.697234	-2.89089	1e-10	3.5039e-09	2.09342e-09	4004	tags=69%, list=20%, signal=56%	MRPL55/CHCHD6/DNAJC19/MRPL42/NDUFB10/NDUFA7/TOMM40L/MRPL28/MRPL20/MFN1/UQCRC2/NDUFB11/NDUFS5/MCU/MICU2/NDUFS1/UQCRQ/NDUFS8/TIMM22/MRPL40/MRPS31/MRPS24/SAMM50/NDUFS7/MRPS27/MRPL27/SDHD/TOMM20/NDUFB2/MRPS18C/PDK1/MPV17L2/NDUFB6/MALSU1/NDUFC1/NDUFA12/MRPL51/MCCC1/NDUFB4/MRPL35/MRPL22/COX4I1/NDUFA10/PMPCB/DAP3/MRPL32/TIMM9/TIMM23/MRPL24/TIMM21/MRPL57/MRPS16/NDUFA1/GRPEL2/MRPS33/NDUFA9/MRPS7/ROMO1/SDH…
CC	GO:0098800	inner mitochondrial membrane protein complex	105	-0.658941	-2.46264	1e-10	3.5039e-09	2.09342e-09	3962	tags=67%, list=20%, signal=54%	CHCHD6/DNAJC19/NDUFB10/NDUFA7/UQCRC2/NDUFB11/NDUFS5/MCU/MICU2/NDUFS1/UQCRQ/NDUFS8/TIMM22/SAMM50/NDUFS7/SDHD/NDUFB2/NDUFB6/NDUFC1/NDUFA12/NDUFB4/COX4I1/NDUFA10/TIMM23/TIMM21/NDUFA1/GRPEL2/NDUFA9/ROMO1/SDHB/NDUFA8/NDUFAB1/NDUFA6/IMMT/TIMM17B/BCS1L/MTX1/UQCR10/NDUFS3/AFG3L2/TIMM50/NDUFB9/NDUFS2/DNAJC11/NDUFB3/UQCRHL/TIMM17A/UQCC3/DNAJC15/NDUFV1/PHB2/FOXRED1/NDUFS6/UQCRFS1/COX6A1/TIMM10/UQCRH/MTX2/SD…
BP	GO:0098813	nuclear chromosome segregation	243	-0.644631	-2.67481	1e-10	3.5039e-09	2.09342e-09	2772	tags=43%, list=14%, signal=37%	BAG6/CDC23/XRCC3/PINX1/CHAMP1/MCMBP/CHMP1A/SMC3/NUP62/AXIN2/ESCO1/SFPQ/NUDC/CTNNB1/ANAPC1/ANAPC11/HNRNPU/PDS5A/CCNB1IP1/KPNB1/P3H4/ZW10/GEN1/CCNE2/PHB2/MAPK15/SEH1L/SPDL1/NCAPH2/RMI1/DDX11/NAA50/NAA10/KNTC1/CENPK/CENPQ/BRIP1/RCC2/MAD2L1BP/RAD21/SMC1A/TUBG1/FBXO5/BUB3/RAN/EME1/RMI2/ESCO2/DSN1/FANCD2/RRS1/NCAPD3/KIF14/CHMP4C/INCENP/KIF22/NCAPD2/DSCC1/SMC4/KNSTRN/SMC2/NDC80/CENPE/PSRC1/NCAPG2/NDC1/K…
BP	GO:0140013	meiotic nuclear division	155	-0.579128	-2.31699	1e-10	3.5039e-09	2.09342e-09	2097	tags=27%, list=11%, signal=24%	PSMC3IP/CCNB1IP1/SPIRE2/PSMD13/CALR/P3H4/CCNE2/MAPK15/NCAPH2/RMI1/BRIP1/BRCA2/RAD21/FBXO5/FIGNL1/EME1/FANCD2/INCENP/FANCA/SMC4/CDC25B/SMC2/RAD51/MND1/NDC1/KIF18A/ESPL1/RAD51AP1/RAD54L/NUF2/TTK/BUB1B/CCNE1/TRIP13/CCNB2/PTTG1/BUB1/PLK1/CKS2/AURKA/TOP2A/CDC20
BP	GO:0140014	mitotic nuclear division	281	-0.586052	-2.5125	1e-10	3.5039e-09	2.09342e-09	1563	tags=35%, list=8%, signal=32%	DRG1/AURKAIP1/ZW10/HOXA13/GEN1/PHB2/SEH1L/SPDL1/NCAPH2/NAA50/NAA10/KNTC1/CENPK/MAD2L1BP/SMPD3/CEP85/PRMT5/RAD21/SMC1A/BCCIP/TUBG1/FBXO5/HSPA1B/BUB3/KIFC2/IL1B/RAN/CHEK2/BORA/KIF20B/VRK1/DSN1/RRS1/NCAPD3/KIF14/CHMP4C/REEP4/CHEK1/RANBP1/INCENP/KIF22/NCAPD2/DSCC1/CDC25C/SMC4/KNSTRN/SMC2/NDC80/CENPE/MZT1/PSRC1/NCAPG2/KIF18A/ESPL1/KIF23/RCC1/TACC3/UBE2S/NUF2/TTK/RACGAP1/KIF11/BUB1B/PKMYT1/KIF18B/DLGAP…
BP	GO:0140053	mitochondrial gene expression	158	-0.730557	-2.9392	1e-10	3.5039e-09	2.09342e-09	4106	tags=78%, list=21%, signal=63%	TRMT5/COA3/GATB/MRPL55/TEFM/MRPL42/NDUFA7/WARS2/MRPL28/MRPL20/RMND1/OXA1L/CHCHD1/MRPL40/GFM2/TRIT1/MRPS31/MRPS24/GADD45GIP1/MRPS27/UQCC1/TRMT10A/MRPL27/ELAC2/MRPS18C/GATC/MPV17L2/MALSU1/MTG2/MRPL51/MRPL35/MRPL22/NOA1/RPUSD4/DAP3/MRPL32/EARS2/MRPL24/FASTKD2/MRPL57/MRPS16/UQCC2/MRPS25/TFB1M/FASTKD3/MRPS33/MRRF/TACO1/RPUSD3/MRPL1/MRPS7/TFAM/CDK5RAP1/MRPS23/TRUB2/MRPL30/MRPL52/MRPS30/MRPL9/MRPL41/QRS…
MF	GO:0140097	catalytic activity, acting on DNA	192	-0.600074	-2.43883	1e-10	3.5039e-09	2.09342e-09	3458	tags=44%, list=18%, signal=36%	FANCM/WRN/LIG3/ERCC2/G3BP1/ASCC3/TATDN1/ALKBH4/CHD1L/ZGRF1/RAD54B/RAD9A/NTHL1/XRCC3/XRCC5/TDG/APEX2/HMGA2/GTF2F2/POLB/TDP1/POLA1/CHRAC1/CHD7/APEX1/SUPV3L1/ATAD5/DHX9/APTX/DDX1/RBBP8/RPS3/PIF1/XRCC6/WRNIP1/GEN1/DCLRE1B/MCM8/ALKBH2/DDX11/NEIL3/PTGES3/POLE/POLD3/DCLRE1A/BRIP1/DNMT1/BLM/TOP1/DNMT3B/RUVBL1/POLE3/UNG/RFC5/MGME1/ENDOG/RUVBL2/POLD1/TOP1MT/LIG1/DNA2/MCM5/RFC2/POLE2/MCM6/ERCC6L/POLQ/CHTF18…
MF	GO:0140098	catalytic activity, acting on RNA	337	-0.562774	-2.45954	1e-10	3.5039e-09	2.09342e-09	4447	tags=53%, list=23%, signal=42%	ZCCHC4/POLR3F/POLR2A/HARS2/POLR2C/TUT1/METTL2B/ANGEL1/DDX39B/POLR2K/CNOT1/ERI3/AQR/TRMT5/GATB/POLR3B/METTL15/DALRD3/METTL3/UPF1/DDX20/CNOT6/DCPS/WARS2/RPAP1/TOE1/POLR2I/DDX51/RPP38/SKIV2L/DDX27/RTCB/FTSJ3/MEPCE/FANCM/DROSHA/POLR3H/QTRT1/POP5/DUS2/METTL1/DIS3/TRPT1/CNOT7/TRIT1/POLR2G/DHX16/RCL1/G3BP1/PPP1R8/EXOSC10/DDX41/THUMPD2/TARBP1/TRMT10A/TRMT112/POLR1D/ELAC2/DBR1/XRN2/DDX52/ERI2/GATC/POLR3A/…
MF	GO:0140101	catalytic activity, acting on a tRNA	97	-0.642693	-2.3399	1e-10	3.5039e-09	2.09342e-09	5037	tags=67%, list=26%, signal=50%	NSUN6/PUS3/DTD1/TRNT1/TRMT61B/SARS2/TSEN2/CARS2/MTFMT/HARS2/METTL2B/TRMT5/GATB/DALRD3/WARS2/RPP38/QTRT1/POP5/DUS2/METTL1/TRPT1/TRIT1/THUMPD2/TARBP1/TRMT10A/ELAC2/GATC/THUMPD3/RPP21/DTD2/METTL2A/EARS2/DUS4L/DUS3L/TRMT61A/POP4/TSEN34/FTSJ1/TRMT6/PTRH2/QRSL1/TRMT11/VARS2/PARS2/WDR4/TARS2/YARS2/NT5C3A/RPP40/TRMT1/AARS2/POP1/PUS1/TRMT10C/LARS2/NARS2/FARSB/NSUN2/DUS1L/FARSA/IARS2/POP7/MARS2/RPP25/DARS2
BP	GO:1901342	regulation of vasculature development	258	0.614976	1.96664	1e-10	3.5039e-09	2.09342e-09	2299	tags=37%, list=12%, signal=33%	HSPB6/SFRP2/THBS4/GREM1/PTGIS/SMOC2/SFRP1/CYP1B1/DCN/SERPINF1/THBS1/EMILIN1/CLDN5/PTN/ADAMTS1/ISM1/C3/THBS2/AKT3/RAMP2/AQP1/SULF1/CCL11/ATP2B4/RHOJ/APLNR/PRKCB/GPNMB/ENPP2/PTPRM/CXCR4/TNFSF12/NPR1/RHOB/TEK/RECK/SPARC/CD34/ITGA5/FGF2/VEGFC/HSPG2/ISL1/CXCL13/CDH5/TIE1/KLF2/ECSCR/TGFBR2/ENG/PPP1R16B/COL4A2/SERPINE1/RRAS/STAB1/HOXA5/PRKD1/GHRL/ETS1/SEMA6A/CX3CR1/ECM1/HGF/RGCC/C3AR1/TWIST1/C5AR1/CMA1/…
MF	GO:1901681	sulfur compound binding	242	0.61412	1.9663	1e-10	3.5039e-09	2.09342e-09	1659	tags=27%, list=8%, signal=25%	THBS4/PRELP/CCDC80/SMOC2/DPYSL3/SFRP1/SOD3/RSPO3/FGF7/GREM2/SELP/THBS1/TNXB/SLIT3/PTN/FBN1/ADAMTS1/LTBP2/CRISPLD2/FSTL1/THBS2/CLEC3B/SLIT2/FGFR1/CFH/COMP/ANXA6/EFEMP2/ADAMTS8/FN1/LTF/SERPINE2/GPNMB/NRP2/PCOLCE/SELL/ECM2/CD34/PTPRS/FGF10/MMP7/FGF2/CXCL13/COL5A1/LRP1/TGFBR3/CTSG/NDNF/LXN/POSTN/PTPRC/ACACB/VTN/LPL/NRP1/CHST15/THBS3/RSPO2/REG4/PTCH1/EVA1C/APOE/RSPO1/VEGFB/PLA2G2D
BP	GO:1901987	regulation of cell cycle phase transition	431	-0.416923	-1.83728	1e-10	3.5039e-09	2.09342e-09	3245	tags=38%, list=16%, signal=32%	PSMD7/PSMF1/PSMC1/PSMB6/RAB11A/MAD2L2/PSMD1/NEDD1/HAUS8/HAUS1/PSMA6/ANAPC2/DDB1/PSMD8/PSMD5/CNOT3/TFAP4/PSMC3/CDC23/PSMB10/XRCC3/PINX1/CDKN2A/TMEM14B/TUBA4A/NBN/UBD/PSME1/PIDD1/HAUS5/DBF4B/CEP78/YWHAG/ANAPC1/CDK5RAP3/ANAPC11/HMGA2/CDK2AP2/CENPJ/NABP2/CARM1/MTBP/CNOT10/CASP2/PSMD12/DDRGK1/CDK4/PSMC6/PSMB9/ODF2/PSMC2/PSMB2/APEX1/PSMB4/TUBB/ATAD5/PSMD13/PSMB1/RINT1/PAXIP1/CUL4A/PSMA7/TRIAP1/HAUS6/PR…
BP	GO:1901988	negative regulation of cell cycle phase transition	237	-0.475471	-1.97002	1e-10	3.5039e-09	2.09342e-09	3347	tags=46%, list=17%, signal=39%	PSMD10/CNOT7/PSMD7/PSMF1/PSMC1/PSMB6/MAD2L2/PSMD1/PSMA6/PSMD8/PSMD5/CNOT3/PSMC3/PSMB10/XRCC3/PINX1/CDKN2A/NBN/PSME1/PIDD1/CDK5RAP3/HMGA2/CDK2AP2/NABP2/CARM1/CNOT10/CASP2/PSMD12/CDK4/PSMC6/PSMB9/PSMC2/PSMB2/PSMB4/PSMD13/PSMB1/RINT1/PSMA7/TRIAP1/PRMT1/ZW10/NAE1/PSMD11/CDK2/PSMC4/E2F4/GEN1/PSME3/PSMB7/SPDL1/PSMB3/PSMA4/PSMA5/PSMA3/PSMB5/CCND1/KNTC1/PSMD2/MUC1/BRCC3/PRKDC/RBL1/PSMB8/DONSON/MAD2L1BP/C…
BP	GO:1901990	regulation of mitotic cell cycle phase transition	400	-0.430903	-1.86386	1e-10	3.5039e-09	2.09342e-09	3347	tags=40%, list=17%, signal=33%	PSMD10/CNOT7/ERCC2/PSMD7/PSMF1/PSMC1/PSMB6/RAB11A/MAD2L2/PSMD1/NEDD1/HAUS8/HAUS1/PSMA6/ANAPC2/DDB1/PSMD8/PSMD5/CNOT3/TFAP4/PSMC3/CDC23/PSMB10/XRCC3/PINX1/CDKN2A/TMEM14B/TUBA4A/NBN/UBD/PSME1/PIDD1/HAUS5/DBF4B/CEP78/YWHAG/ANAPC1/CDK5RAP3/ANAPC11/HMGA2/CDK2AP2/CENPJ/NABP2/CARM1/MTBP/CNOT10/CASP2/PSMD12/CDK4/PSMC6/PSMB9/ODF2/PSMC2/PSMB2/APEX1/PSMB4/TUBB/PSMD13/PSMB1/RINT1/CUL4A/PSMA7/TRIAP1/HAUS6/PRM…
BP	GO:1901991	negative regulation of mitotic cell cycle phase transition	225	-0.478248	-1.97489	1e-10	3.5039e-09	2.09342e-09	3347	tags=47%, list=17%, signal=40%	PSMD10/CNOT7/PSMD7/PSMF1/PSMC1/PSMB6/MAD2L2/PSMD1/PSMA6/PSMD8/PSMD5/CNOT3/PSMC3/PSMB10/XRCC3/PINX1/CDKN2A/NBN/PSME1/PIDD1/CDK5RAP3/HMGA2/CDK2AP2/NABP2/CARM1/CNOT10/CASP2/PSMD12/CDK4/PSMC6/PSMB9/PSMC2/PSMB2/PSMB4/PSMD13/PSMB1/RINT1/PSMA7/TRIAP1/PRMT1/ZW10/NAE1/PSMD11/CDK2/PSMC4/E2F4/GEN1/PSME3/PSMB7/SPDL1/PSMB3/PSMA4/PSMA5/PSMA3/PSMB5/CCND1/KNTC1/PSMD2/MUC1/PRKDC/RBL1/PSMB8/DONSON/MAD2L1BP/CNOT11/…
BP	GO:1902749	regulation of cell cycle G2/M phase transition	208	-0.527964	-2.15683	1e-10	3.5039e-09	2.09342e-09	3245	tags=48%, list=16%, signal=40%	PSMD7/PSMF1/PSMC1/PSMB6/RAB11A/PSMD1/NEDD1/HAUS8/HAUS1/PSMA6/PSMD8/PSMD5/PSMC3/PSMB10/PINX1/TUBA4A/NBN/PSME1/HAUS5/DBF4B/CEP78/YWHAG/CDK5RAP3/HMGA2/CENPJ/NABP2/PSMD12/CDK4/PSMC6/PSMB9/ODF2/PSMC2/PSMB2/PSMB4/TUBB/ATAD5/PSMD13/PSMB1/RINT1/PAXIP1/PSMA7/HAUS6/NAE1/PSMD11/CDK2/PSMC4/CEP131/PSME3/PSMB7/PSMB3/PSMA4/PSMA5/PSMA3/PSMB5/CCND1/SSNA1/PSMD2/HSP90AA1/BRCC3/YWHAE/PSMB8/RCC2/DONSON/BLM/TOPBP1/PSM…
BP	GO:1903046	meiotic cell cycle process	171	-0.584425	-2.38667	1e-10	3.5039e-09	2.09342e-09	2097	tags=29%, list=11%, signal=26%	PSMC3IP/CCNB1IP1/SPIRE2/PSMD13/CALR/P3H4/CCNE2/MAPK15/NCAPH2/RMI1/BRIP1/BRCA2/NSUN2/RAD21/TUBG1/FBXO5/FIGNL1/EME1/FANCD2/NCAPD3/OVOL1/INCENP/FANCA/NCAPD2/CDC25C/SMC4/CDC25B/SMC2/RAD51/MND1/NDC1/KIF18A/ESPL1/RAD51AP1/RAD54L/NUF2/TTK/BUB1B/CDC25A/CCNE1/TRIP13/CCNB2/PTTG1/BUB1/PLK1/CKS2/AURKA/TOP2A/CDC20
BP	GO:1903311	regulation of mRNA metabolic process	324	-0.479797	-2.05897	1e-10	3.5039e-09	2.09342e-09	4204	tags=49%, list=21%, signal=40%	SNRNP70/PSME4/IWS1/CNOT1/CDC73/PKP1/RBM15B/METTL3/RNF40/SMU1/PSMD4/PCID2/UPF1/PRKCD/SAFB/TOB1/ELAVL1/NANOS3/TAF15/RBM39/SF1/PSMD6/CTR9/CPSF6/IGF2BP3/CPSF7/FMR1/SRSF10/HSPA8/DIS3/SNW1/PSMD10/CNOT7/POLR2G/PRDX6/PSMD7/PSMF1/LARP4B/PSMC1/PABPN1/PSMB6/PAPOLA/TRA2B/PSMD1/PSMA6/RBM42/YTHDF2/NUDT21/HNRNPK/RBM15/PSMD8/PSMD5/SAP18/PLEKHN1/SRSF6/PSMC3/PSMB10/RBMX/AXIN2/FASTKD2/NUP98/PSME1/NCBP1/U2AF2/HNRNPM…
BP	GO:1903522	regulation of blood circulation	276	0.59767	1.91802	1e-10	3.5039e-09	2.09342e-09	2597	tags=33%, list=13%, signal=29%	DES/PLN/HSPB7/FLNA/CASQ2/CACNA1H/GNAO1/FXYD6/CAV1/ABCC9/ATP1A2/POPDC2/KCNE4/ATP2B4/RGS2/DMPK/CELF2/TPM1/CACNA2D1/AGT/BVES/DMD/NPR1/ANK2/ATP1B2/CLIC2/F2R/GJA1/CHRM2/CACNA1C/ITPR1/ISL1/KCNH2/RGS4/CHGA/KCNK3/SCN4B/ADRA2A/EDN1/KCND3/EHD3/GHRL/GJC1/NPR2/AGTR1/CACNB2/EPAS1/PDE4B/TRPC1/FXYD1/MEF2A/GJA5/PTGER2/ATP2A3/SCN1B/AVPR1A/KCNA5/PIK3CG/P2RX1/TBXA2R/SLC8A1/CACNG4/STC1/KCNE2/TAC1/TBX2/BMPR2/TGFB2/HT…
CC	GO:1905368	peptidase complex	87	-0.650163	-2.35159	1e-10	3.5039e-09	2.09342e-09	4440	tags=71%, list=23%, signal=55%	ZFAND2B/SEC11A/TAF6/PSME4/PSMD4/ENY2/TAF6L/PIGS/SPCS2/PSMD6/GPAA1/SPCS1/UBQLN1/TAF9/PSMD10/PSMD7/PSMF1/PSMC1/PSMB6/PSMD1/PSMA6/UBE3C/PSMD8/PSMD5/PSMC3/TRRAP/PSMB10/ATXN7L3/PSME1/TADA1/RAD23A/RAD23B/VCP/PSMD12/PSMC6/USP14/PSMB9/PSMC2/PSMB2/AFG3L2/PSMB4/PSMD13/PSMB1/PSMA7/PSMD11/PSMC4/PSME3/PSMB7/PSMB3/PSMA4/PSMA5/PSMA3/PSMB5/ADRM1/PSMD2/UCHL5/UBQLN4/PSMB8/PIGU/PSMD14/PSMD3/PSME2
CC	GO:1905369	endopeptidase complex	67	-0.708355	-2.43088	1e-10	3.5039e-09	2.09342e-09	3980	tags=73%, list=20%, signal=59%	PSMD4/PIGS/PSMD6/GPAA1/UBQLN1/PSMD10/PSMD7/PSMF1/PSMC1/PSMB6/PSMD1/PSMA6/UBE3C/PSMD8/PSMD5/PSMC3/PSMB10/PSME1/RAD23A/RAD23B/VCP/PSMD12/PSMC6/USP14/PSMB9/PSMC2/PSMB2/PSMB4/PSMD13/PSMB1/PSMA7/PSMD11/PSMC4/PSME3/PSMB7/PSMB3/PSMA4/PSMA5/PSMA3/PSMB5/ADRM1/PSMD2/UCHL5/UBQLN4/PSMB8/PIGU/PSMD14/PSMD3/PSME2
BP	GO:2000146	negative regulation of cell motility	262	0.64677	2.06882	1e-10	3.5039e-09	2.09342e-09	2473	tags=39%, list=13%, signal=34%	APOD/SFRP2/GREM1/FBLN1/DPYSL3/PODN/CCL21/SFRP1/CYP1B1/DCN/IGFBP5/IL33/SERPINF1/THBS1/EMILIN1/CLDN5/PTN/CXCL12/MYOCD/COL3A1/SLIT2/DUSP1/MEOX2/SULF1/ATP2B4/CLIC4/MMRN2/MEF2C/CCL2/PHLDB2/TPM1/PTPRM/DLC1/THY1/PRKG1/RHOB/RECK/ATP1B2/GJA1/MCC/TIMP1/ROBO1/FGF2/CXCL13/TGFB1/TIE1/LRP1/CD200/ENG/EVL/LDLRAD4/SERPINE1/NR2F2/RRAS/VCL/CITED2/MITF/IGFBP3/ACVRL1/ARHGDIB/MMP28/CX3CR1/AIF1/RGCC/CHRD/TNN/PFN2/CX3CL…
BP	GO:0061013	regulation of mRNA catabolic process	201	-0.493011	-2.006	1.00446e-10	3.50436e-09	2.09369e-09	4201	tags=52%, list=21%, signal=42%	PSME4/CNOT1/PKP1/METTL3/PSMD4/PCID2/UPF1/PRKCD/TOB1/ELAVL1/NANOS3/TAF15/PSMD6/IGF2BP3/FMR1/HSPA8/DIS3/PSMD10/CNOT7/POLR2G/PSMD7/PSMF1/LARP4B/PSMC1/PSMB6/PSMD1/PSMA6/YTHDF2/PSMD8/PSMD5/PLEKHN1/PSMC3/PSMB10/AXIN2/FASTKD2/PSME1/HNRNPM/FASTK/PDE12/HNRNPR/YBX1/FASTKD3/HNRNPU/MEX3D/DHX34/RBM10/LARP1/TNFSF13/EXOSC3/PSMD12/AGO2/MOV10/HNRNPC/SYNCRIP/PSMC6/ANP32A/PSMB9/PAIP1/IGF2BP1/PSMC2/PSMB2/APEX1/HNRNP…
BP	GO:0051306	mitotic sister chromatid separation	64	-0.703114	-2.41173	1.10518e-10	3.8392e-09	2.29374e-09	1497	tags=45%, list=8%, signal=42%	ZW10/GEN1/SPDL1/NCAPH2/KNTC1/MAD2L1BP/RAD21/FBXO5/BUB3/NDC80/CENPE/ESPL1/TACC3/TTK/BUB1B/DLGAP5/TRIP13/CENPF/CDC6/ZWINT/AURKB/PTTG1/BUB1/PLK1/MAD2L1/CCNB1/CDT1/UBE2C/CDC20
BP	GO:0043488	regulation of mRNA stability	179	-0.510269	-2.0819	1.14867e-10	3.9732e-09	2.37381e-09	4033	tags=53%, list=20%, signal=42%	METTL3/PSMD4/PCID2/UPF1/PRKCD/ELAVL1/TAF15/PSMD6/IGF2BP3/FMR1/HSPA8/DIS3/PSMD10/PSMD7/PSMF1/LARP4B/PSMC1/PSMB6/PSMD1/PSMA6/YTHDF2/PSMD8/PSMD5/PLEKHN1/PSMC3/PSMB10/AXIN2/FASTKD2/PSME1/HNRNPM/FASTK/PDE12/HNRNPR/YBX1/FASTKD3/HNRNPU/MEX3D/RBM10/LARP1/TNFSF13/EXOSC3/PSMD12/MOV10/HNRNPC/SYNCRIP/PSMC6/ANP32A/PSMB9/PAIP1/IGF2BP1/PSMC2/PSMB2/APEX1/HNRNPD/PSMB4/YTHDF1/PSMD13/FASTKD1/PSMB1/EXOSC7/DHX9/FASTK…
BP	GO:0042274	ribosomal small subunit biogenesis	69	-0.69747	-2.38758	1.36312e-10	4.69493e-09	2.805e-09	4969	tags=86%, list=25%, signal=64%	EMG1/RPS14/TSR2/UTP23/KRI1/RPS24/RPS8/MRPS11/RPS28/RPS17/UTP3/RPL38/RPS10/RPS16/NOP9/UTP20/ERCC2/RCL1/RPS5/DDX52/RPS6/NOM1/UTP6/BMS1/XRCC5/RRP36/RPS15/NGDN/METTL17/LSM6/MRPS7/DHX37/TSR1/RPS21/WDR46/RIOK1/HEATR1/RPS7/ABT1/RPS19/WDR3/TBL3/RRP7A/NOB1/NOL10/RPP40/LTV1/SURF6/NOL11/ERAL1/NOP14/FAM207A/PRKDC/DCAF13/RPSA/NAT10/NPM1/RRS1/BYSL
BP	GO:0007200	phospholipase C-activating G protein-coupled receptor signaling pathway	101	0.703031	2.09161	1.37818e-10	4.72668e-09	2.82397e-09	3251	tags=49%, list=16%, signal=41%	S1PR1/VIP/LPAR1/AGT/F2R/PTGER3/CHRM2/F2RL3/CHGA/F2RL2/EDNRB/ADRA2A/EDN1/P2RY8/AGTR1/P2RY10/CX3CR1/C3AR1/GNA14/C5AR1/GRP/HTR2B/NMUR1/FPR3/LPAR6/ACTN2/TGM2/GPR27/CMKLR1/HTR2A/NPR3/GPR20/PTH1R/CCKAR/GPR65/GPR174/GRPR/TACR1/GPR4/P2RY12/GPR17/FPR1/ADRA1D/PLCE1/ANO1/P2RY1/GPR18/DRD1/CCKBR
BP	GO:0150063	visual system development	358	0.53797	1.75059	1.38953e-10	4.7455e-09	2.83522e-09	2415	tags=23%, list=12%, signal=21%	CHRDL1/EFEMP1/CRYAB/CYP1B1/MFAP5/COL8A1/SERPINF1/PTN/FBN1/C3/ALDH1A3/COL8A2/TMOD1/ATP2B4/FOXF2/CLIC4/RHOJ/VIM/PDGFRB/PDGFRA/PTPRM/THY1/MAF/FGF10/GLI3/CACNA1C/FGF2/MEIS1/COL5A1/PBX3/TGFBR2/PBX1/FZD4/WNT9A/SALL2/MYOM1/ARHGEF15/SH3PXD2B/SMARCD3/WNT2B/CDON/MITF/COL5A2/ACVRL1/NRP1/BMP6/MFAP2/INHBA/OBSL1/MEIS3/RBP4/TWSG1/TWIST1/RARB/ITGAM/BCL2/ANGPTL7/LAMB2/SPRY1/FOXC2/TUB/COL4A1/C1QA/TGFBR1/TBX2/BMPR2…
BP	GO:0007080	mitotic metaphase plate congression	50	-0.751258	-2.4342	1.45449e-10	4.94648e-09	2.95529e-09	3223	tags=62%, list=16%, signal=52%	EML4/RAB11A/CHMP5/CHMP2B/CDC23/PINX1/CHAMP1/CHMP1A/NUP62/NUDC/HNRNPU/KPNB1/ZW10/SEH1L/SPDL1/RRS1/KIF14/CHMP4C/KIF22/NDC80/CENPE/PSRC1/KIF18A/NUF2/KIFC1/AURKB/CDCA8/KIF2C/CCNB1/CDT1/CDCA5
BP	GO:0072331	signal transduction by p53 class mediator	255	-0.454469	-1.89288	1.66312e-10	5.63235e-09	3.36507e-09	4777	tags=50%, list=24%, signal=38%	CSNK2A2/TAF12/TAF4B/TOP3A/MSX1/ARID3A/ATR/ELL3/BATF/BAX/RNF34/AKT1/ING5/SETD9/RPA1/TAF6/MBD3/CNOT1/TAF11/TP53/RAD1/TAF2/RPA2/CNOT6/BRD7/TBP/TAF15/BRPF1/MAPKAPK5/WRN/TAF9/SNW1/PSMD10/CNOT7/TP53RK/MYO6/RBBP4/BCL3/RBBP7/HNRNPK/USP28/CNOT3/PPP1R13L/RHNO1/BAG6/TFAP4/ING2/RAD9A/NBN/CSNK2A1/TP73/PIDD1/TAF4/CDK5RAP3/SMYD2/CSNK2B/CARM1/CNOT10/SUPT16H/CASP2/USP10/ARMC10/RPS7/MTA2/PAXIP1/TRIAP1/KDM1A/PRMT1/…
BP	GO:0045787	positive regulation of cell cycle	367	-0.405002	-1.75225	1.67143e-10	5.6369e-09	3.36779e-09	2958	tags=31%, list=15%, signal=27%	SRC/PKN2/LRP5/MNAT1/CNOT3/RHNO1/TFAP4/CDC23/XRCC3/NUP62/TP73/SFPQ/PIDD1/FOXA1/PKP4/DBF4B/HCFC1/ANAPC11/HMGA2/CENPJ/HNRNPU/RAD23A/RAB11FIP4/CARM1/MTBP/CNOT10/EIF4E/CASP2/TBX3/GIPC1/DDRGK1/CDK4/HSF1/APEX1/POLDIP2/ATAD5/CUL4A/TRIAP1/CALR/PRMT1/ADAM10/HOXA13/CDK2/ASNS/E2F4/MYBBP1A/GEN1/EIF4G1/PHB2/MAPK15/DDX11/CCND1/MLXIPL/GPSM2/MUC1/CENPV/BRCA2/RCC2/CIT/MAD2L1BP/CNOT11/SMPD3/RAD21/FBXO5/NPM1/BRCA1/I…
BP	GO:0061982	meiosis I cell cycle process	111	-0.598127	-2.26684	1.70361e-10	5.72157e-09	3.41837e-09	2772	tags=31%, list=14%, signal=26%	BAG6/RAD54B/ING2/MSH6/PSMC3IP/CCNB1IP1/PSMD13/P3H4/CCNE2/MAPK15/RMI1/BRIP1/BRCA2/RAD21/FBXO5/EME1/FANCD2/CDC25C/CDC25B/RAD51/MND1/NDC1/ESPL1/RAD51AP1/RAD54L/CDC25A/CCNE1/TRIP13/CCNB2/PTTG1/PLK1/CKS2/AURKA/TOP2A
BP	GO:0048880	sensory system development	364	0.539748	1.76031	1.72414e-10	5.76659e-09	3.44527e-09	2415	tags=24%, list=12%, signal=21%	CHRDL1/EFEMP1/CRYAB/CYP1B1/MFAP5/COL8A1/SERPINF1/PTN/FBN1/C3/ALDH1A3/COL8A2/TMOD1/ATP2B4/FOXF2/CLIC4/RHOJ/VIM/PDGFRB/PDGFRA/PTPRM/THY1/MAF/FGF10/GLI3/CACNA1C/FGF2/ISL1/MEIS1/COL5A1/PBX3/TGFBR2/PBX1/FZD4/WNT9A/SALL2/MYOM1/ARHGEF15/SH3PXD2B/SMARCD3/WNT2B/CDON/MITF/COL5A2/ACVRL1/NRP1/BMP6/MFAP2/INHBA/OBSL1/MEIS3/RBP4/TWSG1/TWIST1/RARB/ITGAM/BCL2/ANGPTL7/LAMB2/SPRY1/FOXC2/TUB/COL4A1/C1QA/TGFBR1/TBX2/…
CC	GO:0000428	DNA-directed RNA polymerase complex	98	-0.621962	-2.27954	1.77339e-10	5.90692e-09	3.52911e-09	5451	tags=66%, list=28%, signal=48%	MMS19/WDR61/ERCC3/GTF2F1/RPRD1A/POLR3E/GTF2E1/TAF12/TAF4B/POLR3D/GTF2B/POLR3F/POLR2A/POLR2C/TAF6/POLR2K/CDC73/POLR3B/TAF11/TP53/TAF2/PEX2/TAF6L/TBP/POLR2I/CTR9/TAF5L/POLR3H/TAF9/POLR2G/ERCC2/MYO6/POLR1D/POLR3A/MNAT1/POLR1E/POLR2E/POLR2B/TRRAP/POLR2J/TCEA1/TAF4/POLR2L/POLR1A/CDK7/GTF2F2/RPRD1B/POLA1/POLR2D/POLRMT/GTF2A2/GTF2H3/LEO1/TAF5/GTF2E2/PRIM2/POLR3G/POLR3K/POLR1B/PRIM1/KAT2A/POLR2H/POLA2/PO…
BP	GO:0010810	regulation of cell-substrate adhesion	206	0.609944	1.92417	1.79929e-10	5.96862e-09	3.56597e-09	2585	tags=37%, list=13%, signal=32%	APOD/GREM1/CCDC80/FBLN1/CCL21/SFRP1/FLNA/COL8A1/FBLN2/THBS1/LIMS2/EMILIN1/FERMT2/FOXF1/SPOCK1/PTN/MYOC/FAM107A/EPHA3/EFEMP2/FN1/PHLDB2/ECM2/DLC1/NID1/CCR7/THY1/MYADM/TEK/CD36/SPOCK2/ITGA5/COL16A1/EDIL3/LRP1/UTRN/LGALS1/FZD7/FZD4/COL1A1/NDNF/SERPINE1/POSTN/RRAS/PDPN/VCL/ACVRL1/NRP1/GPM6B/MACF1/ARHGAP6/CX3CL1/ILK/BCL2/NEDD9/BST1/BCL6/KDR/CD3E/PREX1/CORO2B/SEMA3E/LIMCH1/PIK3R1/PEAK1/DUSP3/EFNA5/APOA…
CC	GO:0120114	Sm-like protein family complex	78	-0.661145	-2.36792	1.97334e-10	6.51927e-09	3.89496e-09	4401	tags=76%, list=22%, signal=59%	PRPF3/PRPF39/RBMX2/SNRPB2/DDX39B/SMN1/SNRNP70/LSM1/DDX20/ARFGEF1/SF3A3/GEMIN5/PRPF31/MEPCE/SART1/LSM8/FMR1/GEMIN6/SART3/HTATSF1/SF3B2/GEMIN7/DDX23/TXNL4A/GEMIN2/PRPF6/SNRNP40/TXNL4B/LSM6/SF3A2/SF3B5/SNRNP200/USP39/LSM3/SNRPD3/SNRPD2/PRPF40A/CLNS1A/SF3B6/TGS1/LSM7/STRAP/EFTUD2/PHF5A/PPIH/LSM5/SNRPA/GEMIN4/LSM2/SF3B3/SNRPE/SNRPF/PRPF4/SNRPA1/SNRPG/SNRPC/LSM4/SNRPB/SNRPD1
CC	GO:0005643	nuclear pore	82	-0.652597	-2.34883	1.98625e-10	6.53523e-09	3.9045e-09	3034	tags=51%, list=15%, signal=44%	NUP153/POM121/AGFG1/NUP93/NUP62/NUP98/AHCTF1/SUMO1/XPO4/SEC13/POM121C/NUP88/NUP160/NUP54/XPO7/NUP107/NUP43/AAAS/IPO5/KPNB1/NUP62CL/NUP155/XPOT/NXT1/NUTF2/NXT2/NUP85/NUP35/SEH1L/NUP50/EIF5AL1/RAE1/GLE1/NUP188/RANGAP1/NUP205/NUP37/RAN/EIF5A/RANBP1/NDC1/MAD2L1
BP	GO:0042773	ATP synthesis coupled electron transport	84	-0.648014	-2.3537	2.1628e-10	7.08732e-09	4.23435e-09	4012	tags=74%, list=20%, signal=59%	UQCRB/NDUFB5/NDUFV2/NDUFA2/PARK7/NDUFB10/NDUFA7/UQCRC2/NDUFB11/NDUFS5/NDUFS1/UQCRQ/NDUFS8/COX7B/COQ9/NDUFS7/SDHD/NDUFB2/NDUFB6/DGUOK/COX7A2L/NDUFC1/NDUFA12/COX10/NDUFB4/COX4I1/NDUFA10/COX15/COX6B1/NDUFA1/NDUFA9/NDUFA8/NDUFAB1/GHITM/NDUFA6/DLD/UQCR10/NDUFS3/COX5B/NDUFB9/NDUFS2/COX6C/NDUFB3/COX8A/UQCRHL/UQCC3/DNAJC15/CHCHD2/NDUFV1/NDUFS6/UQCRFS1/COX6A1/BID/UQCRH/SDHA/COX5A/COA6/UQCRC1/CYCS/CYC1/CDK…
MF	GO:0001653	peptide receptor activity	149	0.642449	1.98523	2.30466e-10	7.52174e-09	4.49389e-09	3760	tags=38%, list=19%, signal=31%	TACR2/RAMP2/RAMP1/EDNRA/RAMP3/APLNR/CXCR4/NPR1/CCR7/F2R/F2RL3/CALCRL/F2RL2/EDNRB/NPR2/ACKR3/AGTR1/SORCS2/CX3CR1/CCR4/OGFRL1/CYSLTR1/VIPR2/AVPR1A/NMUR1/FPR3/CMKLR1/GLP2R/NPY1R/AVPR2/BDKRB1/NPR3/CCR2/CCR5/MLNR/PTH1R/CCKAR/GRPR/TACR1/GP1BA/XCR1/GPR17/FPR1/CXCR3/CCR1/SCTR/CCR10/BDKRB2/INPP5K/CCKBR/SORCS1/ACKR4/CXCR5/ADCYAP1R1/CCR8/SSTR2/OXTR
BP	GO:1902850	microtubule cytoskeleton organization involved in mitosis	135	-0.56023	-2.20328	2.3173e-10	7.53262e-09	4.50039e-09	849	tags=33%, list=4%, signal=31%	RAE1/SMC1A/BCCIP/TUBG1/HSPA1B/CKAP5/KIFC2/RAN/WDR62/CHEK2/BORA/CHMP4C/STMN1/CENPH/NDC80/CENPE/MZT1/PSRC1/STIL/ESPL1/KIF23/RCC1/TACC3/NUF2/TTK/RACGAP1/SPC25/KIF11/DLGAP5/KIFC1/NUSAP1/PRC1/KIF4A/CENPA/AURKB/PLK1/MAD2L1/NEK2/CCNB1/MYBL2/AURKA/TPX2/CDC20/SAPCD2
CC	GO:0030880	RNA polymerase complex	100	-0.613858	-2.25949	2.41004e-10	7.80275e-09	4.66178e-09	5451	tags=65%, list=28%, signal=47%	MMS19/WDR61/ERCC3/GTF2F1/RPRD1A/POLR3E/GTF2E1/TAF12/TAF4B/POLR3D/GTF2B/POLR3F/POLR2A/POLR2C/TAF6/POLR2K/CDC73/POLR3B/TAF11/TP53/TAF2/PEX2/TAF6L/TBP/POLR2I/CTR9/TAF5L/POLR3H/TAF9/POLR2G/ERCC2/MYO6/POLR1D/POLR3A/MNAT1/POLR1E/POLR2E/POLR2B/TRRAP/POLR2J/TCEA1/TAF4/POLR2L/POLR1A/CDK7/GTF2F2/RPRD1B/POLA1/POLR2D/POLRMT/GTF2A2/GTF2H3/LEO1/TAF5/GTF2E2/PRIM2/POLR3G/POLR3K/POLR1B/PRIM1/KAT2A/POLR2H/POLA2/PO…
BP	GO:0051146	striated muscle cell differentiation	242	0.584619	1.87184	2.53329e-10	8.16911e-09	4.88066e-09	2587	tags=29%, list=13%, signal=26%	MYH11/LMOD1/FLNC/GREM1/PGM5/IGFBP5/PI16/JAM2/CACNA1H/TMEM119/MYOCD/EHD2/CSRP1/POPDC2/CFL2/COMP/TMOD1/RGS2/DMPK/LDB3/IGF2/PDGFRB/MEF2C/PDGFRA/TPM1/PLEKHO1/BVES/DMD/SMYD1/ACTC1/BHLHE41/ISL1/TGFB1/RGS4/FZD7/SORBS2/SMO/EDN1/CSRP2/CD53/CDON/CAV2/IGF1/LOX/OBSL1/MEF2A/RARB/AKAP6/AVPR1A/ALPK3/BCL2/RBM24/SLC8A1/ACTN2/HDAC5/SGCB/TMOD2/FHOD3/CASQ1/HEY2/CDH2/HDAC9/MYEF2/NFATC2/ACVR1/SKI/FHL2/AKAP13/MMP14/DKK…
CC	GO:0055029	nuclear DNA-directed RNA polymerase complex	97	-0.620058	-2.25749	3.03453e-10	9.74662e-09	5.82316e-09	5451	tags=66%, list=28%, signal=48%	MMS19/WDR61/ERCC3/GTF2F1/RPRD1A/POLR3E/GTF2E1/TAF12/TAF4B/POLR3D/GTF2B/POLR3F/POLR2A/POLR2C/TAF6/POLR2K/CDC73/POLR3B/TAF11/TP53/TAF2/PEX2/TAF6L/TBP/POLR2I/CTR9/TAF5L/POLR3H/TAF9/POLR2G/ERCC2/MYO6/POLR1D/POLR3A/MNAT1/POLR1E/POLR2E/POLR2B/TRRAP/POLR2J/TCEA1/TAF4/POLR2L/POLR1A/CDK7/GTF2F2/RPRD1B/POLA1/POLR2D/GTF2A2/GTF2H3/LEO1/TAF5/GTF2E2/PRIM2/POLR3G/POLR3K/POLR1B/PRIM1/KAT2A/POLR2H/POLA2/POLR1C/MC…
BP	GO:0050678	regulation of epithelial cell proliferation	317	0.552302	1.7861	3.05882e-10	9.78582e-09	5.84657e-09	2582	tags=36%, list=13%, signal=31%	SFRP2/THBS4/SFRP1/SERPINF1/FGF7/THBS1/LIMS2/NGFR/PTN/CXCL12/CAV1/FGFR1/AKT3/VIP/SULF1/CCL11/KLF9/APLNR/IGF2/MEF2C/GPC3/CCL2/NRP2/GPBAR1/PTPRM/TNFSF12/TEK/SPARC/GLI1/NR4A3/GJA1/HTRA1/MCC/FGF10/ROBO1/FGF2/VEGFC/ISL1/TGFB1/TIE1/WFDC1/FZD7/TGFBR3/PPP1R16B/CYP7B1/SCG2/EDNRB/EGR3/NR2F2/SMO/CDKN1C/HOXA5/PRKD1/CD109/GHRL/NUPR1/AGTR1/ACVRL1/CAV2/NRP1/BMP6/SNAI2/IGF1/ECM1/RGCC/TWIST1/C5AR1/LAMC1/ZFP36/PTCH…
MF	GO:0140375	immune receptor activity	132	0.656421	2.00623	3.28131e-10	1.04563e-08	6.24713e-09	3836	tags=53%, list=19%, signal=43%	GFRA1/IL1R1/CR2/CXCR4/CCR7/CSF2RB/IL6ST/GHR/FZD4/CRLF1/LEPR/IL10RA/HLA-DQA1/IL3RA/ACKR3/IL7R/LIFR/CX3CR1/CCR4/OSMR/C3AR1/C5AR1/HLA-DPA1/HLA-DOA/CD4/FPR3/HLA-DQA2/IL2RG/CMKLR1/IL6R/EBI3/HLA-DOB/MR1/PIGR/HLA-DRA/CD74/CCR2/CCR5/FCGR2B/CNTFR/CR1/XCR1/HLA-DRB1/IL4R/IL11RA/FCER1G/CD44/GPR17/HLA-DQB2/FPR1/F3/CXCR3/GFRA3/IL17RD/CCR1/IL1RL1/CCR10/HLA-DQB1/IL2RB/LILRB1/CD200R1/GFRA2/FLT3/ACKR4/CXCR5/IL18R1…
MF	GO:0030546	signaling receptor activator activity	469	0.508997	1.66494	3.48411e-10	1.10314e-08	6.59077e-09	3682	tags=30%, list=19%, signal=25%	OGN/SFRP2/THBS4/CCL19/GREM1/CCL21/EFEMP1/IL33/FGF7/GREM2/PTN/CXCL12/FBN1/VIP/CCL11/IGF2/GPNMB/CCL2/TGFB3/AGT/TNFSF12/CLEC11A/CXCL14/CTF1/FGF10/TIMP1/FGF2/VEGFC/EPHA7/PDGFD/CXCL13/SST/IL34/CARTPT/TGFB1/SEMA3G/LTB/WNT9A/SCG2/SEMA3C/CRLF1/CMTM3/GAS6/EDN1/GHRL/WNT2B/SEMA6A/BMP6/PDGFC/INHBA/IGF1/HGF/FLRT2/BMP3/GMFG/MIA/IL16/SEMA6B/FNDC5/CX3CL1/GRP/REG1A/TFF1/CCL22/TNFSF8/VEGFB/STC1/GDF10/SEMA6D/SEMA6C…
BP	GO:0001822	kidney development	279	0.56628	1.81913	3.48906e-10	1.10314e-08	6.59077e-09	2583	tags=31%, list=13%, signal=27%	GREM1/ACTA2/SFRP1/DCN/SERPINF1/FBN1/ADAMTS1/KANK2/TNS2/HEYL/WWTR1/SLIT2/ITGA8/SULF1/PECAM1/KCNJ8/BICC1/PDGFRB/MEF2C/PDGFRA/GPC3/SIX2/AGT/BASP1/PKD2/DCHS1/NID1/TEK/TCF21/CD34/FGF10/GLI3/ZBTB16/GLIS2/FGF2/EPHA7/PDGFD/EGR1/FAT4/PBX1/CRLF1/SOX17/SMO/GLI2/COL4A4/HPGD/AGTR1/WNT2B/FSTL3/BMP6/PKD1/LRRK2/RARB/PYGO1/PTCH1/BCL2/MTSS1/LAMB2/ARID5B/SPRY1/VANGL2/FOXC2/EPHA4/ANGPT1/ID3/AKR1B1/TGFBR1/KLF15/GATA3…
BP	GO:2001251	negative regulation of chromosome organization	85	-0.641722	-2.32431	3.66702e-10	1.1549e-08	6.89997e-09	3255	tags=47%, list=17%, signal=39%	EXOSC10/MAD2L2/ACD/SRC/MNAT1/XRCC3/PINX1/NBN/HNRNPU/HNRNPC/HNRNPA1/ZW10/PIF1/PARP1/GEN1/SPDL1/NAA10/KNTC1/MAD2L1BP/RAD21/NAT10/FBXO5/BUB3/NDC80/ESPL1/TTK/BUB1B/TRIP13/CENPF/ZWINT/MCM2/AURKB/PTTG1/BUB1/PLK1/MAD2L1/CCNB1/CDT1/TOP2A/CDC20
MF	GO:0048018	receptor ligand activity	463	0.512668	1.67612	3.68693e-10	1.15653e-08	6.9097e-09	3682	tags=30%, list=19%, signal=25%	OGN/SFRP2/THBS4/CCL19/GREM1/CCL21/EFEMP1/IL33/FGF7/GREM2/PTN/CXCL12/FBN1/VIP/CCL11/IGF2/GPNMB/CCL2/TGFB3/AGT/TNFSF12/CLEC11A/CXCL14/CTF1/FGF10/TIMP1/FGF2/VEGFC/EPHA7/PDGFD/CXCL13/SST/IL34/CARTPT/TGFB1/SEMA3G/LTB/WNT9A/SCG2/SEMA3C/CRLF1/CMTM3/GAS6/EDN1/GHRL/WNT2B/SEMA6A/BMP6/PDGFC/INHBA/IGF1/HGF/FLRT2/BMP3/GMFG/MIA/IL16/SEMA6B/FNDC5/CX3CL1/GRP/REG1A/TFF1/CCL22/TNFSF8/VEGFB/STC1/GDF10/SEMA6D/SEMA6C…
BP	GO:0090329	regulation of DNA-dependent DNA replication	46	-0.75106	-2.39102	3.70077e-10	1.15653e-08	6.9097e-09	1393	tags=52%, list=7%, signal=49%	WRNIP1/TIPIN/BRCA2/DONSON/BLM/RFC5/FBXO5/WDR18/RFC2/CDC7/CHEK2/E2F7/STOML2/CHTF18/GMNN/DBF4/DSCC1/RFC4/TICRR/E2F8/TIMELESS/RFC3/PCNA/CDT1
CC	GO:0000794	condensed nuclear chromosome	83	-0.647082	-2.34754	3.82743e-10	1.19151e-08	7.11872e-09	1513	tags=42%, list=8%, signal=39%	MIS18BP1/RAD9A/CHMP1A/SMC3/CCNB1IP1/CDX2/P3H4/RSPH1/CENPK/BRCA2/BLM/NIFK/TOPBP1/RAD21/SMC1A/TUBG1/NOL6/BRCA1/CENPO/SUV39H1/DSN1/RRS1/LRPPRC/CHEK1/INCENP/RAD51/NDC80/RCC1/NUF2/BUB1B/CENPA/BUB1/PLK1/NEK2/CCNB1
BP	GO:0033045	regulation of sister chromatid segregation	69	-0.690186	-2.36265	3.9921e-10	1.23801e-08	7.39654e-09	1497	tags=43%, list=8%, signal=40%	ZW10/GEN1/MAPK15/SPDL1/KNTC1/MAD2L1BP/RAD21/FBXO5/BUB3/RMI2/NDC80/CENPE/ESPL1/TACC3/TTK/BUB1B/DLGAP5/TRIP13/CENPF/CDC6/ZWINT/AURKB/PTTG1/BUB1/PLK1/MAD2L1/CCNB1/CDT1/UBE2C/CDC20
BP	GO:0045132	meiotic chromosome segregation	75	-0.661654	-2.35338	4.01661e-10	1.24086e-08	7.41354e-09	1513	tags=29%, list=8%, signal=27%	P3H4/CCNE2/MAPK15/NCAPH2/RMI1/BRIP1/RAD21/EME1/FANCD2/SMC4/SMC2/NDC1/ESPL1/NUF2/TTK/BUB1B/CCNE1/TRIP13/PTTG1/BUB1/PLK1/TOP2A
CC	GO:0000922	spindle pole	158	-0.523723	-2.10706	4.07747e-10	1.25487e-08	7.49725e-09	3134	tags=38%, list=16%, signal=32%	RAB11A/NEDD1/HAUS8/TUBGCP4/HAUS1/KATNB1/KIF2A/SMC3/NUP62/PKP4/CTNNB1/HNRNPU/AAAS/ODF2/MISP/HSF1/PLEKHG6/ZW10/SPDL1/DDX11/FAM110A/GPSM2/KNTC1/BRCC3/RAE1/TOPBP1/TMEM201/CEP85/RAD21/SMC1A/BCCIP/TUBG1/NPM1/CKAP5/WDR62/KIF20B/AUNIP/CDC25B/CKAP2L/KNSTRN/ASPM/PSRC1/PLK4/CKAP2/TACC3/KIF11/POC1A/DLGAP5/PRC1/SPAG5/CENPF/CDC6/AURKB/PLK1/MAD2L1/NEK2/CCNB1/AURKA/TPX2/CDC20
CC	GO:0005925	focal adhesion	409	0.526002	1.71667	4.63926e-10	1.42235e-08	8.4979e-09	2763	tags=32%, list=14%, signal=28%	CNN1/SYNPO2/FHL1/FLNC/TNS1/SORBS1/PGM5/FLNA/NEXN/AKAP12/DDR2/LIMS2/FERMT2/PALLD/TGFB1I1/SVIL/TNC/TNS2/CAV1/CSRP1/ITGA8/SCARF2/FAM107A/ANXA6/ITGBL1/LPP/VIM/DIXDC1/GSN/PDGFRB/MCAM/PDLIM7/LAYN/NFASC/PHLDB2/CSPG4/MRC2/DLC1/ITGA1/ACTC1/THY1/RHOB/TEK/EFS/MSN/DAB2/GJA1/ITGA5/HSPG2/ARHGAP31/LRP1/AHNAK/ENG/PARVA/RDX/EVL/SORBS2/ITGA11/PTPRC/RRAS/CSRP2/FAP/EHD3/L1CAM/VCL/ARHGAP24/TLN1/CNN3/DST/TSPAN9/CAV2/N…
BP	GO:0042775	mitochondrial ATP synthesis coupled electron transport	83	-0.644858	-2.33947	4.70393e-10	1.43674e-08	8.58385e-09	4012	tags=73%, list=20%, signal=59%	UQCRB/NDUFB5/NDUFV2/NDUFA2/PARK7/NDUFB10/NDUFA7/UQCRC2/NDUFB11/NDUFS5/NDUFS1/UQCRQ/NDUFS8/COX7B/COQ9/NDUFS7/SDHD/NDUFB2/NDUFB6/DGUOK/COX7A2L/NDUFC1/NDUFA12/COX10/NDUFB4/COX4I1/NDUFA10/COX15/COX6B1/NDUFA1/NDUFA9/NDUFA8/NDUFAB1/GHITM/NDUFA6/DLD/UQCR10/NDUFS3/COX5B/NDUFB9/NDUFS2/COX6C/NDUFB3/COX8A/UQCRHL/UQCC3/DNAJC15/CHCHD2/NDUFV1/NDUFS6/UQCRFS1/COX6A1/BID/UQCRH/SDHA/COX5A/UQCRC1/CYCS/CYC1/CDK1/CCN…
BP	GO:1902099	regulation of metaphase/anaphase transition of cell cycle	61	-0.693254	-2.34317	4.76193e-10	1.44899e-08	8.65703e-09	1497	tags=44%, list=8%, signal=41%	ZW10/GEN1/MAPK15/SPDL1/KNTC1/MAD2L1BP/RAD21/FBXO5/BUB3/NDC80/CENPE/ESPL1/TTK/BUB1B/DLGAP5/TRIP13/CENPF/CDC6/ZWINT/AURKB/BUB1/PLK1/MAD2L1/CCNB1/CDT1/UBE2C/CDC20
BP	GO:0007091	metaphase/anaphase transition of mitotic cell cycle	60	-0.696843	-2.34627	4.80997e-10	1.45812e-08	8.71162e-09	1497	tags=45%, list=8%, signal=42%	ZW10/GEN1/SPDL1/KNTC1/MAD2L1BP/RAD21/FBXO5/BUB3/NDC80/CENPE/ESPL1/TACC3/TTK/BUB1B/DLGAP5/TRIP13/CENPF/CDC6/ZWINT/AURKB/BUB1/PLK1/MAD2L1/CCNB1/CDT1/UBE2C/CDC20
BP	GO:0060402	calcium ion transport into cytosol	148	0.638023	1.97438	5.24383e-10	1.58372e-08	9.46197e-09	2563	tags=35%, list=13%, signal=31%	PLN/CCL19/CCL21/JPH2/CASQ2/CAV1/ATP1A2/ATP2B4/MS4A1/RAMP3/APLNR/CACNA2D1/PKD2/DMD/CCR7/THY1/ANK2/CLIC2/F2R/F2RL3/CACNA1C/FGF2/ITPR1/PRNP/PTPRC/TRPC1/GPER1/FYN/CX3CL1/AKAP6/BCL2/CD19/CD4/HTR2B/SLC8A1/RASA3/CORO1A/PLCG2/HTR2A/P2RX7/GSTM2/BDKRB1/PDE4D/CASQ1/SLC8A2/CCR5/SNCA/ITPR2/TRPV2/RYR2/GRIN2A/XCR1
BP	GO:0006413	translational initiation	191	-0.498586	-2.01931	5.63074e-10	1.69425e-08	1.01223e-08	5306	tags=62%, list=27%, signal=46%	MTOR/RPS14/RPL5/RPS27A/EIF3K/EIF2D/DDX3X/TPR/RPS20/YTHDF3/RPL31/RPS24/ATF4/RPS29/RPS8/EIF1/EIF3C/RPL3/MTFMT/RPL6/RPS28/RPL9/RPL30/DNAJC3/RPS11/RPL36/RPS3A/RPS13/RPL4/KLHL25/EIF2B4/RPS17/RPL35A/METTL3/RPL32/RPL41/PPP1R15B/RPL38/RPS10/EIF5/RPS12/RPS16/RPL23A/FMR1/RPL18A/RPS26/POLR2G/RPS4X/EIF2A/RPS5/EIF2B2/EIF3H/RPL24/RPLP2/YTHDF2/EIF3A/RPS6/RPL37A/EIF2B5/RPL36A/RPL19/EIF3J/EIF1AD/EIF4H/EIF4E2/DHX3…
MF	GO:0008528	G protein-coupled peptide receptor activity	145	0.64142	1.98304	5.85423e-10	1.75497e-08	1.04851e-08	3760	tags=39%, list=19%, signal=31%	TACR2/RAMP2/RAMP1/EDNRA/RAMP3/APLNR/CXCR4/NPR1/CCR7/F2R/F2RL3/CALCRL/F2RL2/EDNRB/ACKR3/AGTR1/SORCS2/CX3CR1/CCR4/OGFRL1/CYSLTR1/VIPR2/AVPR1A/NMUR1/FPR3/CMKLR1/GLP2R/NPY1R/AVPR2/BDKRB1/NPR3/CCR2/CCR5/MLNR/PTH1R/CCKAR/GRPR/TACR1/GP1BA/XCR1/GPR17/FPR1/CXCR3/CCR1/SCTR/CCR10/BDKRB2/INPP5K/CCKBR/SORCS1/ACKR4/CXCR5/ADCYAP1R1/CCR8/SSTR2/OXTR
BP	GO:0051383	kinetochore organization	20	-0.900386	-2.37579	6.0509e-10	1.80723e-08	1.07974e-08	980	tags=65%, list=5%, signal=62%	CENPK/CENPN/CENPH/SMC4/CENPW/SMC2/NDC80/CENPE/NUF2/DLGAP5/CENPA/CENPF/CDT1
MF	GO:0003697	single-stranded DNA binding	107	-0.597394	-2.2408	6.72635e-10	2.00159e-08	1.19585e-08	2276	tags=43%, list=12%, signal=38%	NABP2/HNRNPU/RAD23A/RAD23B/TDP1/POLA1/HSF1/HMCES/HNRNPA1/POLR2D/DHX9/APTX/RBBP8/RAD18/LONP1/HMGB1/TSN/MCM8/NUP35/DDX11/NEIL3/SSBP1/HNRNPA2B1/RPA3/BRCA2/REXO4/BLM/TOP1/MSH2/POLR2H/MCM5/MCM6/LRPPRC/HMGB2/SMC4/SMC2/RAD51/MCM10/NME1/MCM3/HSPD1/RAD51AP1/MCM7/MCM4/CDC45/MCM2
CC	GO:0072686	mitotic spindle	148	-0.535147	-2.11156	6.77409e-10	2.00841e-08	1.19993e-08	3679	tags=47%, list=19%, signal=38%	RMDN3/EPB41/WRAP73/HAUS2/EML2/MAPRE1/TBL1XR1/EML4/HAUS8/HAUS1/ATAT1/CLTC/DIAPH1/CTTN/SMC3/TMEM9/NUP62/NUDC/HAUS5/PKP4/HNRNPU/IQCB1/AAAS/CCSAP/TAF1D/MISP/HSF1/HAUS6/RPS3/GPSM2/IL17RB/RCC2/HNF4G/RAE1/SMC1A/BCCIP/TUBG1/RANGAP1/KIFC2/KAT2A/CDC7/KIF20B/KIF22/KDF1/CKAP2L/KNSTRN/CENPE/ASPM/KIF18A/SKA1/ESPL1/KIF23/TACC3/RACGAP1/KIF11/KIF18B/KIFC1/NUSAP1/PRC1/SPAG5/CDC6/AURKB/ECT2/SKA3/CDK1/PLK1/MAD2L1/AU…
BP	GO:0048771	tissue remodeling	162	0.627844	1.95079	6.9183e-10	2.04368e-08	1.221e-08	2709	tags=35%, list=14%, signal=31%	THBS4/GREM1/SFRP1/PDK4/FLNA/RSPO3/HAND2/IGFBP5/DDR2/TMEM119/PTN/MMP2/S1PR1/CAV1/BGN/RASSF2/AXL/MEF2C/GPNMB/LTBP3/TGFB3/CSPG4/AGT/F2R/CTHRC1/GJA1/FGF10/TIMP1/CARTPT/TGFB1/TIE1/SEMA3C/LEPR/CSF1R/MITF/EPAS1/ACVRL1/ITGB3/HOXA3/FOXC2/ADRB2/TGM2/BMPR2/NOTCH2/P2RX7/CLDN18/FLT4/NOS3/CCR2/EGFR/PTH1R/MMP14/CA2/LIPA/CD38/INPP5D/CST3
BP	GO:0032956	regulation of actin cytoskeleton organization	327	0.55124	1.7838	7.13966e-10	2.10054e-08	1.25497e-08	3406	tags=37%, list=17%, signal=31%	SYNPO2/LMOD1/CCL21/ELN/SFRP1/FLNA/FERMT2/CXCL12/JAM3/SVIL/S1PR1/SYNPO/MYOC/SLIT2/FAM107A/CFL2/TMOD1/CCL11/EPHA3/DIXDC1/GSN/PDGFRB/PDGFRA/CDC42EP3/TGFB3/PHLDB2/TPM1/LPAR1/DLC1/CCR7/CGNL1/MYADM/RHOB/TEK/LRP1/RGS4/RDX/EVL/CSF1R/ARHGEF15/EDN1/KANK3/HCLS1/PAM/NRP1/ARHGDIB/WASF3/ASAP3/NCKAP1L/RGCC/PLEKHH2/RHOQ/GMFG/GPM6B/DSTN/PFN2/ARHGAP6/ESAM/CYFIP2/CX3CL1/WAS/BST1/PTGER4/STAP1/ODAM/PREX1/CORO1A/SWAP7…
BP	GO:0090066	regulation of anatomical structure size	469	0.506139	1.65559	7.1627e-10	2.10054e-08	1.25497e-08	3406	tags=32%, list=17%, signal=27%	LMOD1/ACTA2/CCL21/ELN/KCNMA1/MAP1B/CXCL12/NTN1/SVIL/CAV1/ATP1A2/SLIT2/AKT3/AQP1/CFL2/COMP/TMOD1/CCL11/EDNRA/RGS2/FN1/GSN/CDC42EP3/AGT/ITGA1/NPR1/CCR7/PRKG1/MYADM/MSN/PTPRS/F2R/GJA1/EPHA7/KLF2/SEMA3G/LRP1/RDX/EVL/SEMA3C/EDNRB/ADRA2A/EDN1/PLXNA4/L1CAM/KANK3/HCLS1/AGTR1/IL7R/SEMA6A/OLFM1/NRP1/CRABP2/WASF3/NCKAP1L/PLEKHH2/GJA5/LRRK2/GMFG/GPER1/DSTN/MACF1/PFN2/SEMA6B/ESAM/CYFIP2/DPYSL2/AVPR1A/WAS/KCNA…
BP	GO:0016458	gene silencing	194	-0.488609	-1.9941	8.02508e-10	2.34495e-08	1.401e-08	4603	tags=49%, list=23%, signal=38%	MAP2K2/PCGF2/NUP214/FXR1/POLR2A/ADAR/POLR2C/LIMD1/POLR2K/CNOT1/EED/TP53/METTL3/MAP2K1/ELAVL1/CNOT6/RIF1/POLR2I/NUP133/MORF4L2/SIRT6/FMR1/DROSHA/CNOT7/POLR2G/CTBP1/CLP1/DPY30/NUP153/POM121/CNOT3/PCGF1/NUP93/POLR2E/POLR2B/EIF4E2/CHMP1A/NUP62/ERI1/NUP98/MYCN/POLR2J/NCBP1/NCBP2/SEC13/PIWIL1/POM121C/NUP88/NUP160/NUP54/POLR2L/NUP107/NUP43/SND1/AAAS/CNOT10/AJUBA/AGO2/MOV10/TARBP2/PPARG/NUP155/POLR2D/HAT…
BP	GO:0090068	positive regulation of cell cycle process	280	-0.436731	-1.85566	9.64309e-10	2.8076e-08	1.67741e-08	2917	tags=32%, list=15%, signal=28%	PKN2/LRP5/CNOT3/RHNO1/CDC23/XRCC3/NUP62/TP73/SFPQ/PIDD1/PKP4/DBF4B/ANAPC11/HMGA2/CENPJ/HNRNPU/RAB11FIP4/CARM1/MTBP/CNOT10/CASP2/GIPC1/DDRGK1/CDK4/APEX1/ATAD5/CUL4A/TRIAP1/PRMT1/HOXA13/CDK2/E2F4/MYBBP1A/GEN1/EIF4G1/PHB2/MAPK15/DDX11/CCND1/GPSM2/MUC1/CENPV/RCC2/CIT/MAD2L1BP/CNOT11/SMPD3/RAD21/FBXO5/NPM1/BRCA1/IL1B/CDC7/CHEK2/KIF20B/TFDP1/E2F7/KIF14/RANBP1/DBF4/CDC25C/CDC25B/E2F8/NDC80/PLK4/EZH2/ESP…
BP	GO:0043542	endothelial cell migration	204	0.595796	1.87663	9.68488e-10	2.80966e-08	1.67864e-08	2448	tags=40%, list=12%, signal=35%	GREM1/SMOC2/CYP1B1/DCN/SERPINF1/THBS1/PTN/FSTL1/SLIT2/FGFR1/AKT3/MEOX2/ATP2B4/MMRN2/RHOJ/CLEC14A/MEF2C/NRP2/PTPRM/AGT/TNFSF12/RHOB/TEK/SPARC/SRPX2/ROBO1/FGF2/VEGFC/CXCL13/CDH5/TGFB1/SCG2/EGR3/NR2F2/EDN1/RRAS/SOX18/FAP/PRKD1/ETS1/MAP3K3/ACVRL1/NRP1/RGCC/ITGB3/ATOH8/PIK3CG/SASH1/APOE/PIK3CD/TBXA2R/KDR/VASH1/FOXC2/STC1/PTGS2/ANGPT1/STARD13/TGFBR1/BMPR2/GATA3/HDAC5/PTP4A3/SEMA5A/ITGB2/HSPB1/FLT4/LPXN…
BP	GO:0044784	metaphase/anaphase transition of cell cycle	63	-0.69188	-2.35756	9.95828e-10	2.87865e-08	1.71986e-08	1497	tags=44%, list=8%, signal=41%	ZW10/GEN1/MAPK15/SPDL1/KNTC1/MAD2L1BP/RAD21/FBXO5/BUB3/NDC80/CENPE/ESPL1/TACC3/TTK/BUB1B/DLGAP5/TRIP13/CENPF/CDC6/ZWINT/AURKB/BUB1/PLK1/MAD2L1/CCNB1/CDT1/UBE2C/CDC20
CC	GO:0005684	U2-type spliceosomal complex	89	-0.630899	-2.26248	1.02125e-09	2.94162e-08	1.75748e-08	4774	tags=69%, list=24%, signal=52%	TFIP11/BCAS2/PRPF3/PRPF39/RBM8A/RBMX2/SNRPB2/ISY1/SNRNP70/MFAP1/AQR/PLRG1/CRNKL1/PRPF38A/SMU1/SF3A3/CCDC12/PRPF31/SART1/LSM8/BUD31/SNW1/DHX16/MAGOHB/BUD13/HTATSF1/CDC5L/SF3B2/TXNL4A/PRPF6/U2AF2/SNRNP40/LSM6/SF3B4/SF3A2/SF3B5/SNRNP200/LSM3/SNRPD3/SNRPD2/PRPF40A/SF3B6/LSM7/PRPF19/EFTUD2/DHX15/PHF5A/LSM5/LSM2/SF3B3/SNRPE/PPIL1/EIF4A3/SNRPF/PRPF4/SNRPA1/SNRPG/SNRPC/LSM4/SNRPB/SNRPD1
BP	GO:0007015	actin filament organization	406	0.521058	1.69999	1.06108e-09	3.04474e-08	1.81909e-08	3406	tags=33%, list=17%, signal=28%	SYNPO2/LMOD1/DPYSL3/CCL21/ELN/SFRP1/SORBS1/CALD1/FLNA/TPM2/FERMT2/CXCL12/SVIL/S1PR1/SYNPO/MYOC/SLIT2/FAM107A/CFL2/GAS7/TMOD1/CCL11/GSN/CDC42EP3/TGFB3/PHLDB2/TPM1/LPAR1/DLC1/CCR7/ACTC1/CGNL1/MYADM/RHOB/EFS/WIPF1/RGS4/RDX/EVL/SORBS2/ARHGEF15/GHRL/ELMO1/KANK3/HCLS1/NRP1/WASF3/AIF1/ASAP3/NCKAP1L/RGCC/PLEKHH2/GMFG/DSTN/ACTN1/PFN2/ARHGAP6/LCP1/ESAM/SHROOM4/CYFIP2/CX3CL1/WAS/BCL2/MYO5A/ARHGAP25/NEDD9/PT…
BP	GO:1905818	regulation of chromosome separation	69	-0.680967	-2.33109	1.06457e-09	3.04474e-08	1.81909e-08	1497	tags=42%, list=8%, signal=39%	ZW10/GEN1/MAPK15/SPDL1/KNTC1/MAD2L1BP/RAD21/FBXO5/BUB3/NDC80/CENPE/ESPL1/TACC3/TTK/BUB1B/DLGAP5/TRIP13/CENPF/CDC6/ZWINT/AURKB/PTTG1/BUB1/PLK1/MAD2L1/CCNB1/CDT1/UBE2C/CDC20
BP	GO:0110053	regulation of actin filament organization	250	0.561674	1.79446	1.15767e-09	3.29937e-08	1.97122e-08	3406	tags=36%, list=17%, signal=30%	SYNPO2/LMOD1/CCL21/ELN/SFRP1/FLNA/FERMT2/CXCL12/SVIL/S1PR1/SYNPO/MYOC/SLIT2/CFL2/TMOD1/CCL11/GSN/CDC42EP3/TGFB3/PHLDB2/TPM1/LPAR1/DLC1/CCR7/CGNL1/MYADM/RGS4/RDX/EVL/ARHGEF15/KANK3/HCLS1/NRP1/WASF3/ASAP3/NCKAP1L/RGCC/PLEKHH2/GMFG/DSTN/PFN2/ARHGAP6/ESAM/CYFIP2/CX3CL1/WAS/PTGER4/PREX1/CORO1A/SWAP70/CORO2B/ACTN2/ARHGEF10/TAC1/TGFBR1/PLEKHG2/LIMCH1/SPIRE1/SEMA5A/PIK3R1/TMOD2/DBN1/CCDC88A/APOA1/JMY/FHO…
CC	GO:0032993	protein-DNA complex	112	-0.57475	-2.17884	1.27041e-09	3.60795e-08	2.15558e-08	2839	tags=38%, list=14%, signal=33%	SOX12/CDC5L/XRCC5/CTNNB1/HMGA2/NFE2/GTF2F2/POLA1/GTF2H3/PRPF19/XRCC6/PARP1/NFYA/KDM1B/PRIM2/PRKDC/RPA3/POLD3/GINS3/DONSON/TOP1/PRIM1/NPM1/HOXA11/WDR18/POLR2H/GINS4/POLA2/POLD1/MCM5/MCM6/JUP/POLD2/MCM3/GINS1/PCNA/TONSL/MCM7/GINS2/MCM4/CDC45/CENPA/MCM2
BP	GO:0030278	regulation of ossification	106	0.683034	2.03872	1.31933e-09	3.73381e-08	2.23078e-08	2392	tags=39%, list=12%, signal=34%	MGP/GREM1/SFRP1/DDR2/OMD/TMEM119/PTN/S1PR1/COMP/LTF/MEF2C/SIX2/LTBP3/TGFB3/ZBTB16/TGFB1/PBX1/EGR2/SRGN/BMP6/ECM1/GPM6B/TWIST1/BCL2/ALOX5/SLC8A1/PTGER4/ADRB2/PKDCC/TAC1/BMPR2/TGFB2/ANKH/P2RX7/KL/BMPR1B/SMAD7/CSF1/DHRS3/ACVR1/SGMS2
BP	GO:0007127	meiosis I	106	-0.581068	-2.17575	1.34753e-09	3.80032e-08	2.27051e-08	2097	tags=25%, list=11%, signal=23%	PSMC3IP/CCNB1IP1/PSMD13/P3H4/CCNE2/RMI1/BRIP1/BRCA2/RAD21/FBXO5/EME1/FANCD2/CDC25B/RAD51/MND1/NDC1/ESPL1/RAD51AP1/RAD54L/CCNE1/TRIP13/CCNB2/PTTG1/PLK1/CKS2/AURKA/TOP2A
BP	GO:0098781	ncRNA transcription	100	-0.599073	-2.20508	1.44257e-09	4.05422e-08	2.42221e-08	5355	tags=70%, list=27%, signal=51%	IPPK/SNAPC1/MTOR/SP1/GTF2F1/RPRD1A/BRF1/GTF2E1/INTS9/CCNT1/POU2F1/ELL3/GTF2B/INTS4/POLR2A/INTS12/POLR2C/TAF6/POLR2K/TAF11/TP53/SIRT7/CCNK/TBP/PWP1/POLR2I/MEPCE/INTS5/TAF9/POLR2G/GTF3C3/POLR1E/POLR2E/POLR2B/PIH1D1/POLR2J/INTS1/NCBP1/CC2D1A/INTS2/NCBP2/POLR2L/NABP2/CDK7/GTF2F2/SNAPC4/GTF3A/RPRD1B/GTF3C6/SMARCB1/GTF3C2/INTS8/SMARCA4/POLR2D/GTF2A2/GTF3C4/INTS7/TAF5/GTF2E2/DDX11/NOL11/TCOF1/INTS10/POL…
BP	GO:0007179	transforming growth factor beta receptor signaling pathway	189	0.599323	1.88846	1.44844e-09	4.05662e-08	2.42364e-08	2433	tags=33%, list=12%, signal=30%	ASPN/LTBP1/FMOD/THBS1/EMILIN1/FERMT2/CLDN5/MYOCD/TGFB1I1/FBN1/LTBP2/LRRC32/CAV1/COL3A1/HTRA3/LTBP3/COL1A2/TGFB3/SMAD9/LTBP4/DKK3/DAB2/HTRA1/CDH5/TGFB1/TGFBR2/ENG/TGFBR3/LDLRAD4/CDKN1C/PEG10/VASN/NREP/CD109/HPGD/CITED2/ACVRL1/CAV2/LOX/TWSG1/CDKN2B/SPRY1/NRROS/LATS2/GDF10/TGFBR1/TGFB2/ZMIZ1/JUN/ZYX/FOS/ADAMTSL2/LPXN/CHST11/PMEPA1/SKIL/HSPA1A/USP9Y/SMAD7/PBLD/ACVR1/SKI/RASL11B
CC	GO:0061695	transferase complex, transferring phosphorus-containing groups	241	-0.449914	-1.8628	1.51681e-09	4.23346e-08	2.5293e-08	5451	tags=50%, list=28%, signal=36%	MMS19/CDK13/PRKAG1/POLG/WDR61/PRPSAP2/CISH/ERCC3/PRPS1/GTF2F1/RPRD1A/POLR3E/GTF2E1/RB1/CNPPD1/ACVR1B/TAF12/TAF4B/POLR3D/CCNT1/GTF2B/PHKG2/POLR3F/POLR2A/POLR2C/TAF6/PRKAR2A/POLR2K/CDC73/POLR3B/ACVR2B/TAF11/TP53/TAF2/CCNK/PEX2/TAF6L/TBP/POLR2I/CTR9/VAC14/TAF5L/POLR3H/TAF9/SOCS6/SNW1/POLR2G/SOCS7/ERCC2/PFKL/MYO6/POLR1D/MAD2L2/CHUK/POLR3A/MNAT1/POLR1E/TRIM40/PIK3CB/POLR2E/POLR2B/PRPSAP1/TRRAP/POLR2J/…
BP	GO:0010631	epithelial cell migration	282	0.557642	1.78922	1.56104e-09	4.34193e-08	2.5941e-08	2600	tags=37%, list=13%, signal=33%	GREM1/SMOC2/CYP1B1/DCN/SERPINF1/FGF7/THBS1/PTN/KANK2/FSTL1/SLIT2/FGFR1/AKT3/MEOX2/ATP2B4/KIT/MMRN2/RHOJ/CLEC14A/MEF2C/NRP2/ENPP2/PTPRM/AGT/TNFSF12/RHOB/TEK/SPARC/SRPX2/MCC/FGF10/ZEB2/ROBO1/FGF2/VEGFC/CXCL13/CDH5/TGFB1/TGFBR2/EVL/SCG2/GLIPR2/EGR3/NR2F2/EDN1/RRAS/SOX18/FAP/PRKD1/ETS1/MAP3K3/ACVRL1/NRP1/RGCC/MAPRE2/MACF1/PFN2/ITGB3/ATOH8/PIK3CG/SASH1/APOE/PIK3CD/ARSB/TBXA2R/KDR/VASH1/FOXC2/STC1/PTGS…
BP	GO:0070646	protein modification by small protein removal	287	-0.42406	-1.83186	1.62202e-09	4.49611e-08	2.68622e-08	4923	tags=41%, list=25%, signal=31%	TNIP2/OTUD4/RHOA/OTUD3/TAB1/USP37/USP40/SENP3/USP36/STAMBP/USP46/DESI2/USP7/NEDD8/USP18/BAP1/OTULIN/DDB2/SENP2/USP9X/PSME4/USP24/COPS7B/COPS6/TP53/PARK7/PSMD4/ENY2/PSMD6/SUDS3/NFRKB/COPS3/USP5/HGS/OTUB2/PSMD10/SART3/DESI1/PSMD7/PSMF1/PSMC1/PSMB6/PSMD1/TOMM20/KEAP1/PSMA6/USP28/PSMD8/PSMD5/PSMC3/TRRAP/PSMB10/MCRS1/OTUD6B/ATXN7L3/PSME1/YOD1/SPATA2/HCFC1/COPS5/FOXK2/RAD23A/GPS1/RAD23B/POLB/VCP/USP39/…
BP	GO:0033002	muscle cell proliferation	174	0.614943	1.93279	1.63392e-09	4.51363e-08	2.69668e-08	2600	tags=37%, list=13%, signal=32%	CNN1/APOD/OGN/ELN/RBPMS2/IGFBP5/THBS1/MYOCD/ADAMTS1/MMP2/S1PR1/VIP/EFEMP2/PDGFRB/MEF2C/TGFB3/TPM1/PDE1A/NPR1/PRKG1/GLI1/NR4A3/GJA1/CALCRL/FGF2/PDGFD/MEIS1/TGFBR2/TGFBR3/ZFPM2/EDN1/HPGD/IGFBP3/IGF1/AIF1/GPER1/PTGIR/RBP4/CX3CL1/FOXC2/ANGPT1/KCNK2/AKR1B1/TGM2/TGFBR1/TBX2/TGFB2/JUN/PTAFR/IL6R/ADIPOQ/PIM1/NDRG2/TENM4/GNAI2/NPR3/NPPC/MEF2D/HEY2/EGFR/CCL5/NOG/MAPK11/FOXP1
BP	GO:0071674	mononuclear cell migration	184	0.606292	1.90203	1.653e-09	4.55082e-08	2.7189e-08	3195	tags=40%, list=16%, signal=34%	APOD/CCL19/GREM1/CCL21/THBS1/JAM2/CXCL12/S1PR1/CH25H/SLIT2/DUSP1/CCL11/PECAM1/RARRES2/GPR183/CCL2/CXCR4/CCR7/CXCL14/MSN/PDGFD/CXCL13/IL34/CD200/CYP7B1/CSF1R/SERPINE1/GAS6/AIF1/ECM1/CD99L2/C3AR1/MADCAM1/C5AR1/CX3CL1/ITGAL/PIK3CG/ALOX5/SPN/CXCL17/PIK3CD/CCL22/DOCK8/ITGA4/GATA3/CMKLR1/CCL14/IL6R/GPR15/RET/CCL23/CCR2/CCR5/ANXA1/STK10/CSF1/NBL1/CCL5/FLT1/ZAP70/CCL13/MYO1G/PLCB1/SIRPA/CCL26/CXCR3/PLA2G…
BP	GO:0060348	bone development	185	0.606223	1.90221	1.79164e-09	4.91578e-08	2.93695e-08	3187	tags=41%, list=16%, signal=34%	SFRP2/SFRP4/GREM1/TMEM119/FBN1/BGN/MYOC/COMP/SULF1/KIT/ANXA6/LTF/MEF2C/LTBP3/TGFB3/DCHS1/TEK/GJA1/GLI3/MEIS1/RAB23/LRRC17/FAT4/TGFBR2/ENG/COL1A1/FOXN3/PTPRC/SH3PXD2B/GHRL/FLI1/NPR2/GPR68/BMP6/TYROBP/PDGFC/IGF1/LOX/SCX/THBS3/TWIST1/RARB/PIP4K2A/HOXB4/PTGER4/STC1/ALPL/BMPR2/NOTCH2/SULF2/BMPR1B/CLDN18/CSGALNACT1/FGF18/NPPC/MEF2D/SH2B3/FREM1/DHRS3/XYLT1/SKI/AKAP13/CHAD/MMP14/MMP16/HAS2/FOXP1/ZNF385A/…
BP	GO:0000956	nuclear-transcribed mRNA catabolic process	198	-0.482467	-1.95597	1.89416e-09	5.17952e-08	3.09452e-08	4720	tags=55%, list=24%, signal=42%	RPS24/RPS29/RPS8/RPL3/SMG9/RBM8A/RPL6/RPS28/RPL9/RPL30/PPP2R1A/RPS11/GSPT1/RPL36/RPS3A/RPS13/RPL4/CNOT1/RPS17/RPL35A/LSM1/RPL32/RPL41/PCID2/UPF1/TOB1/CNOT6/DCPS/EDC4/NANOS3/RPL38/RPS10/SKIV2L/RPS12/RPS16/HBS1L/RPL23A/RPL18A/RPS26/DIS3/CNOT7/POLR2G/RPS4X/EXOSC10/MAGOHB/RPS5/XRN2/RPL24/RPLP2/RPS6/RPL37A/CNOT3/RPL36A/RPL19/RPL35/MTPAP/NCBP1/PDE12/PPP2R2A/RPS15/NCBP2/LSM6/SMG5/SMG7/RPL7/HELZ2/RPL14/R…
BP	GO:0090132	epithelium migration	285	0.553303	1.77791	1.93825e-09	5.28221e-08	3.15588e-08	2600	tags=37%, list=13%, signal=32%	GREM1/SMOC2/CYP1B1/DCN/SERPINF1/FGF7/THBS1/PTN/KANK2/FSTL1/SLIT2/FGFR1/AKT3/MEOX2/ATP2B4/KIT/MMRN2/RHOJ/CLEC14A/MEF2C/NRP2/ENPP2/PTPRM/AGT/TNFSF12/RHOB/TEK/SPARC/SRPX2/MCC/FGF10/ZEB2/ROBO1/FGF2/VEGFC/CXCL13/CDH5/TGFB1/TGFBR2/EVL/SCG2/GLIPR2/EGR3/NR2F2/EDN1/RRAS/SOX18/FAP/PRKD1/ETS1/MAP3K3/ACVRL1/NRP1/RGCC/MAPRE2/MACF1/PFN2/ITGB3/ATOH8/PIK3CG/SASH1/APOE/PIK3CD/ARSB/TBXA2R/KDR/VASH1/FOXC2/STC1/PTGS…
BP	GO:0002576	platelet degranulation	124	0.660991	2.0095	1.99352e-09	5.40388e-08	3.22857e-08	3004	tags=46%, list=15%, signal=39%	FLNA/ISLR/A2M/CLU/SELP/THBS1/SERPING1/F13A1/CLEC3B/TIMP3/PECAM1/FN1/MMRN1/IGF2/RARRES2/TGFB3/PCDH7/VWF/SPARC/CD36/CFD/TIMP1/VEGFC/PROS1/TGFB1/SERPINE1/GAS6/SRGN/CD109/VCL/TLN1/BLK/IGF1/ECM1/HGF/ACTN1/ITGB3/P2RX1/F8/VEGFB/ACTN2/TGFB2/LHFPL2/APOA1/F5/PLEK/PSAP/ANXA5/FERMT3/MAGED2/ITIH3/ENDOD1/CTSW/LEFTY2/TMSB4X/SYTL4/PHACTR2
BP	GO:0032102	negative regulation of response to external stimulus	343	0.530105	1.71718	1.99624e-09	5.40388e-08	3.22857e-08	3335	tags=35%, list=17%, signal=29%	GREM1/PTGIS/RGMA/A2M/SERPINF1/THBS1/FOXF1/SERPING1/FGL2/SLIT2/DUSP1/SYT11/LTF/SERPINE2/PDGFRA/CCL2/PHLDB2/THBD/PRKG1/TEK/CD34/PTPRS/GJA1/HTRA1/ROBO1/CALCRL/FGF2/ISL1/PROS1/CXCL13/CDH5/CARTPT/SEMA3G/CD200/C1QTNF1/WFDC1/SEMA3C/C1QTNF3/SERPINE1/PTPRC/EDN1/PLAT/FAP/CD109/GHRL/VTN/SEMA6A/NRP1/MMP28/IGF1/AIF1/HGF/BACE1/GPER1/IFI16/SEMA6B/AOAH/CX3CL1/ALOX5/APOE/CXCL17/RORA/RIN3/VSIG4/TFPI/FNDC4/PTGER4/S…
BP	GO:0010959	regulation of metal ion transport	233	0.578579	1.8433	2.10787e-09	5.68703e-08	3.39774e-08	3261	tags=36%, list=17%, signal=30%	PLN/MYLK/JPH2/CASQ2/GEM/CXCL12/GNAO1/CAV1/RRAD/ATP1A2/RAMP3/APLNR/PDGFRB/CCL2/CACNA2D1/PKD2/CXCR4/DMD/THY1/ANK2/ATP1B2/CLIC2/F2R/GJA1/HSPA2/F2RL3/CACNA1C/KCNH2/AHNAK/RGS4/REM1/SPINK1/PRNP/ADRA2A/EHD3/CACNB2/PDE4B/TRPC1/FXYD1/GPER1/IL16/FYN/PLP1/CX3CL1/AKAP6/BCL2/PIK3CG/RGS9/P2RX1/CD19/CD4/CD84/SLC8A1/STC1/KCNE2/CORO1A/PLCG2/P2RX7/FCRL3/GSTM2/BDKRB1/GNAI2/GJC2/PDE4D/CASQ1/SNCA/CAMK2G/TRPV2/CCL5/RY…
BP	GO:0070588	calcium ion transmembrane transport	289	0.556432	1.79075	2.13483e-09	5.74063e-08	3.42976e-08	3292	tags=31%, list=17%, signal=26%	PLN/CCL19/CCL21/JPH2/CASQ2/GEM/CACNA1H/RRAD/ATP1A2/SLC24A3/ATP2B4/ANXA6/RAMP3/APLNR/CACNA2D1/PKD2/NCS1/DMD/CCR7/THY1/ANK2/CLIC2/F2R/HSPA2/F2RL3/CACNA1C/FGF2/ITPR1/AHNAK/REM1/PRNP/ADRA2A/GAS6/PTPRC/EHD3/CACNB2/PDE4B/PKD1/TRPC1/GPER1/FYN/PLP1/CX3CL1/ATP2A3/AKAP6/PIK3CG/RGS9/CD19/MICU3/HTR2B/SLC8A1/CACNG4/RASA3/KCNE2/CORO1A/TMEM37/PLCG2/TRPC4/HTR2A/P2RX7/GSTM2/BDKRB1/GJC2/ITGAV/PDE4D/CASQ1/SLC8A2/CC…
CC	GO:0098803	respiratory chain complex	72	-0.659127	-2.30802	2.20561e-09	5.91133e-08	3.53174e-08	4580	tags=69%, list=23%, signal=54%	UQCRB/NDUFB5/NDUFV2/NDUFA2/NDUFB10/NDUFA7/UQCRC2/NDUFB11/NDUFS5/NDUFS1/UQCRQ/NDUFS8/COX7B/NDUFS7/SDHD/NDUFB2/NDUFB6/NDUFC1/NDUFA12/NDUFB4/COX4I1/NDUFA10/COX6B1/NDUFA1/NDUFA9/SDHB/NDUFA8/NDUFAB1/NDUFA6/BCS1L/UQCR10/NDUFS3/NDUFB9/NDUFS2/NDUFB3/COX8A/UQCRHL/UQCC3/NDUFV1/FOXRED1/NDUFS6/UQCRFS1/COX6A1/UQCRH/SDHA/COX5A/COA6/UQCRC1/C15orf48/CYC1
CC	GO:0005635	nuclear envelope	436	-0.370739	-1.64542	2.35177e-09	6.28224e-08	3.75335e-08	3039	tags=33%, list=15%, signal=29%	TNPO3/NUP153/SEPHS1/RBM15/CPTP/POM121/DHRS2/YEATS4/MLX/AGFG1/OSBPL3/HTATIP2/NUP93/MTDH/CPNE1/S100A6/TM7SF2/MGST2/NUP62/TXNL4A/NUP98/RAP1GAP2/INTS1/UBXN4/SMOX/AHCTF1/SUMO1/XPO4/INTS2/SEC13/POM121C/NUP88/YBX1/NUP160/NUP54/MFSD10/TMC6/TOR3A/TOR4A/DHX37/XPO7/NUP107/NUP43/AAAS/MRPS23/IPO9/GCHFR/POLA1/DPY19L1/LBR/CDK4/KCNJ11/IPO5/RAB40B/KPNB1/NUP62CL/RNF6/GCH1/TUBB/NUP155/BANF1/XPOT/EI24/ANXA4/PRKCZ/SY…
BP	GO:0051924	regulation of calcium ion transport	224	0.578966	1.83861	2.39788e-09	6.38437e-08	3.81436e-08	3261	tags=36%, list=17%, signal=30%	PLN/MYLK/JPH2/CASQ2/GEM/CXCL12/GNAO1/CAV1/RRAD/ATP1A2/RAMP3/APLNR/PDGFRB/CCL2/CACNA2D1/PKD2/CXCR4/DMD/THY1/ANK2/CLIC2/F2R/GJA1/HSPA2/F2RL3/CACNA1C/AHNAK/RGS4/REM1/SPINK1/PRNP/ADRA2A/EHD3/CACNB2/PDE4B/TRPC1/GPER1/IL16/FYN/PLP1/CX3CL1/AKAP6/BCL2/PIK3CG/RGS9/P2RX1/CD19/CD4/CD84/SLC8A1/STC1/KCNE2/CORO1A/PLCG2/P2RX7/FCRL3/GSTM2/BDKRB1/GNAI2/GJC2/PDE4D/CASQ1/SNCA/CAMK2G/TRPV2/CCL5/RYR2/HOMER3/P2RY12/AB…
CC	GO:0045121	membrane raft	312	0.543823	1.7561	2.4506e-09	6.48207e-08	3.87274e-08	3288	tags=37%, list=17%, signal=31%	PTGIS/SORBS1/CLIP3/KCNMA1/TUBA1A/SGCA/CD79A/S1PR1/CAV1/EHD2/ATP1A2/PRKAR2B/SULF1/ATP2B4/PECAM1/MS4A1/MAL/RFTN1/DLC1/BVES/CNTN1/DMD/SLC2A4/ITGA1/THY1/STOM/MYADM/TEK/CD36/F2R/GJA1/AHNAK/TGFBR2/CHRNA3/CD48/EDNRB/ITLN1/GNAI1/PRNP/SMO/PTPRC/PDPN/PLVAP/CNR1/CAV2/TREM2/RGMB/MS4A4A/RHOQ/BACE1/FXYD1/LRRK2/GPM6B/ABCA1/FYN/SELE/ITGAM/PTCH1/AKAP6/KCNA3/KCNA5/P2RX1/TLR1/CD19/BTK/CD4/TFPI/SELPLG/CD2/CARD11/KDR…
CC	GO:0098857	membrane microdomain	312	0.543823	1.7561	2.4506e-09	6.48207e-08	3.87274e-08	3288	tags=37%, list=17%, signal=31%	PTGIS/SORBS1/CLIP3/KCNMA1/TUBA1A/SGCA/CD79A/S1PR1/CAV1/EHD2/ATP1A2/PRKAR2B/SULF1/ATP2B4/PECAM1/MS4A1/MAL/RFTN1/DLC1/BVES/CNTN1/DMD/SLC2A4/ITGA1/THY1/STOM/MYADM/TEK/CD36/F2R/GJA1/AHNAK/TGFBR2/CHRNA3/CD48/EDNRB/ITLN1/GNAI1/PRNP/SMO/PTPRC/PDPN/PLVAP/CNR1/CAV2/TREM2/RGMB/MS4A4A/RHOQ/BACE1/FXYD1/LRRK2/GPM6B/ABCA1/FYN/SELE/ITGAM/PTCH1/AKAP6/KCNA3/KCNA5/P2RX1/TLR1/CD19/BTK/CD4/TFPI/SELPLG/CD2/CARD11/KDR…
BP	GO:0030071	regulation of mitotic metaphase/anaphase transition	58	-0.698465	-2.358	2.4782e-09	6.53374e-08	3.9036e-08	1497	tags=45%, list=8%, signal=42%	ZW10/GEN1/SPDL1/KNTC1/MAD2L1BP/RAD21/FBXO5/BUB3/NDC80/CENPE/ESPL1/TTK/BUB1B/DLGAP5/TRIP13/CENPF/CDC6/ZWINT/AURKB/BUB1/PLK1/MAD2L1/CCNB1/CDT1/UBE2C/CDC20
BP	GO:0097485	neuron projection guidance	273	0.552915	1.77536	2.50668e-09	6.58735e-08	3.93564e-08	2945	tags=35%, list=15%, signal=30%	NEXN/BOC/NGFR/SLIT3/PALLD/CXCL12/NTN1/LAMA2/GFRA1/SLIT2/EPHA3/VSTM2L/PDLIM7/NRP2/NFASC/PTPRM/CXCR4/GLI3/ROBO1/ISL1/EPHA7/NTN4/SEMA3G/LRP1/NRXN3/EVL/SEMA3C/EGR2/CSF1R/SMO/GLI2/KLF7/NOTCH3/PLXNA4/L1CAM/FEZ1/SEMA6A/NRP1/PLA2G10/DOK5/NCAM1/CNTN4/PLXNC1/FLRT2/CHN1/CRMP1/SEMA6B/FYN/DPYSL2/EMB/SCN1B/PTCH1/EPHB6/GAP43/VLDLR/LAMB2/PIK3CD/NFIB/IRS2/SEMA6D/EPHA4/SEMA6C/GAB1/HOXA2/ROBO4/SEMA3E/BMPR2/GATA3/NO…
BP	GO:0001654	eye development	354	0.532005	1.73108	2.59904e-09	6.80796e-08	4.06744e-08	2415	tags=23%, list=12%, signal=20%	CHRDL1/EFEMP1/CRYAB/CYP1B1/MFAP5/COL8A1/SERPINF1/PTN/FBN1/ALDH1A3/COL8A2/TMOD1/ATP2B4/FOXF2/CLIC4/RHOJ/VIM/PDGFRB/PDGFRA/PTPRM/THY1/MAF/FGF10/GLI3/CACNA1C/FGF2/MEIS1/COL5A1/PBX3/TGFBR2/PBX1/FZD4/WNT9A/SALL2/MYOM1/ARHGEF15/SH3PXD2B/SMARCD3/WNT2B/CDON/MITF/COL5A2/ACVRL1/NRP1/BMP6/MFAP2/INHBA/OBSL1/MEIS3/RBP4/TWSG1/TWIST1/RARB/BCL2/ANGPTL7/LAMB2/SPRY1/FOXC2/TUB/COL4A1/TGFBR1/TBX2/BMPR2/GATA3/TGFB2/N…
MF	GO:0016779	nucleotidyltransferase activity	108	-0.578076	-2.17175	2.6423e-09	6.89896e-08	4.12181e-08	4992	tags=58%, list=25%, signal=44%	POLR3E/MOCS3/TRNT1/UAP1/FPGT/POLH/POLR3D/POLR3F/POLR2A/POLR2C/TUT1/POLR2K/POLR3B/RPAP1/POLR2I/POLR3H/POLR2G/POLR1D/PAPOLA/POLR3A/POLR1E/CTU1/POLR2E/POLR2B/POLR2J/MTPAP/CTU2/GMPPB/MED20/GPHN/POLR2L/POLR1A/NUDT5/POLB/UAP1L1/POLA1/CHRAC1/GMPPA/POLR2D/POLRMT/NANS/FLAD1/PCYT2/OAS1/POLR3G/PTGES3/POLR3K/POLE/POLD3/POLR1B/OAS3/PNPT1/YRDC/POLE3/COASY/PRIM1/POLR2H/POLD1/CDS1/POLR1C/POLE2/POLQ/DKC1
BP	GO:0007052	mitotic spindle organization	110	-0.579167	-2.19995	2.73673e-09	7.12253e-08	4.25538e-08	849	tags=47%, list=4%, signal=45%	TBCE/CHMP1A/SMC3/NUP62/NUDC/HNRNPU/AAAS/VCP/CCSAP/KPNB1/MISP/DRG1/GPSM2/RAE1/SMC1A/BCCIP/TUBG1/HSPA1B/CKAP5/KIFC2/RAN/WDR62/CHEK2/BORA/CHMP4C/STMN1/CENPH/NDC80/CENPE/MZT1/PSRC1/STIL/KIF23/RCC1/TACC3/NUF2/TTK/RACGAP1/SPC25/KIF11/DLGAP5/KIFC1/PRC1/KIF4A/AURKB/PLK1/NEK2/CCNB1/MYBL2/AURKA/TPX2/CDC20
BP	GO:0055001	muscle cell development	155	0.619851	1.91873	2.94367e-09	7.63656e-08	4.56249e-08	2408	tags=32%, list=12%, signal=29%	MYH11/LMOD1/FLNC/PGM5/PI16/CSRP1/RAMP2/CFL2/COMP/TMOD1/EFEMP2/RGS2/LDB3/PDGFRB/PDGFRA/TPM1/BVES/DMD/ACTC1/ANK2/ISL1/RGS4/ENG/NFATC4/SORBS2/SMO/EDN1/CSRP2/CAV2/IGF1/LOX/OBSL1/MEF2A/DYSF/AKAP6/ALPK3/BCL2/SLC8A1/ACTN2/SGCB/TMOD2/SYPL2/FHOD3/CASQ1/HEY2/HDAC9/NFATC2/SKI/FHL2/AKAP13
BP	GO:0006283	transcription-coupled nucleotide-excision repair	73	-0.649598	-2.28711	3.21606e-09	8.31654e-08	4.96875e-08	4573	tags=59%, list=23%, signal=45%	USP7/POLR2A/POLR2C/RBX1/RPA1/ISY1/POLR2K/AQR/COPS7B/COPS6/RFC1/RPA2/POLR2I/COPS3/LIG3/POLR2G/ERCC2/DDB1/MNAT1/POLR2E/POLR2B/POLR2J/TCEA1/POLR2L/COPS5/CDK7/GPS1/POLR2D/GTF2H3/CUL4A/PRPF19/HMGN1/RPA3/POLD3/RFC5/POLR2H/POLD1/LIG1/RFC2/RFC4/POLD2/RFC3/PCNA
BP	GO:0097553	calcium ion transmembrane import into cytosol	130	0.648336	1.97862	3.50971e-09	9.04701e-08	5.40517e-08	2563	tags=36%, list=13%, signal=32%	PLN/CCL19/CCL21/JPH2/CASQ2/ATP1A2/ATP2B4/RAMP3/APLNR/CACNA2D1/PKD2/DMD/CCR7/THY1/ANK2/CLIC2/F2R/F2RL3/CACNA1C/FGF2/ITPR1/PRNP/PTPRC/TRPC1/GPER1/FYN/CX3CL1/AKAP6/CD19/HTR2B/SLC8A1/RASA3/CORO1A/PLCG2/HTR2A/GSTM2/BDKRB1/PDE4D/CASQ1/SLC8A2/CCR5/SNCA/ITPR2/TRPV2/RYR2/GRIN2A/XCR1
BP	GO:0090288	negative regulation of cellular response to growth factor stimulus	92	0.698763	2.05862	3.5251e-09	9.05783e-08	5.41164e-08	2541	tags=40%, list=13%, signal=35%	SFRP2/GREM1/CHRDL1/SFRP1/DCN/RBPMS2/GREM2/THBS1/EMILIN1/NGFR/FBN1/SLIT2/SULF1/ATP2B4/HTRA3/MMRN2/AGT/HTRA1/FGF2/CXCL13/SHISA2/FSTL3/SEMA6A/CHRD/TWSG1/SPRY1/CRIM1/GATA3/SULF2/FUZ/SKIL/SMAD7/SKI/NBL1/BMPER/ADAMTS12/NOG
BP	GO:0050867	positive regulation of cell activation	320	0.539201	1.74116	4.0122e-09	1.02627e-07	6.1315e-08	3832	tags=45%, list=19%, signal=37%	CCL19/CCL21/IL33/SELP/THBS1/CAV1/AXL/IGF2/PDGFRB/MEF2C/GPR183/CCL2/TOX/ITPKB/CCR7/THY1/IGLL5/VCAM1/NR4A3/FGF10/GLI3/ZBTB16/IL6ST/TGFB1/LGALS1/TGFBR2/EGR3/GAS6/PTPRC/CD27/GLI2/SASH3/IL7R/HLA-DPB1/LEF1/TYROBP/TREM2/IGF1/AIF1/NCKAP1L/LRRK2/FYN/ITGAM/CD5/SOX15/TLR4/HLA-DPA1/BCL2/BTK/CD4/RASAL3/DOCK8/BST1/BCL6/CD2/CARD11/CD3E/IRS2/TNFRSF13C/STAP1/CD1D/JAK3/STAT5B/CORO1A/TAC1/TNFSF13B/GATA3/CD28/ZMIZ1/…
CC	GO:0005657	replication fork	61	-0.673863	-2.27763	4.01937e-09	1.02627e-07	6.1315e-08	2924	tags=66%, list=15%, signal=56%	SMARCAD1/RPA1/PLRG1/TP53/RFC1/RPA2/BAZ1B/WRN/MMS22L/CDC5L/XRCC3/TEX264/NBN/POLA1/HMCES/PRPF19/PIF1/RAD18/PRIM2/TIPIN/RPA3/POLD3/DONSON/BLM/PRIM1/RFC5/POLA2/POLD1/RFC2/WDHD1/XRCC2/RFC4/POLD2/TIMELESS/UHRF1/MCM10/MCM3/RFC3/PCNA/TONSL
BP	GO:0018108	peptidyl-tyrosine phosphorylation	356	0.524075	1.70559	4.23382e-09	1.07763e-07	6.43832e-08	3749	tags=40%, list=19%, signal=33%	SFRP2/THBS4/GREM1/SFRP1/EFEMP1/DDR2/FGF7/CAV1/ROR2/FGFR1/EPHA3/PECAM1/KIT/AXL/IGF2/PDGFRB/PDGFRA/ENPP2/CSPG4/AGT/CNTN1/THY1/TEK/CD36/CTF1/ITGA5/FGF10/ISL1/EPHA7/PDGFD/IL6ST/IL34/TGFB1/TIE1/GHR/CRLF1/SPINK1/CSF1R/PRNP/ADRA2A/GAS6/PTPRC/GHRL/HCLS1/VTN/BANK1/ROR1/NRP1/BMP6/DLG4/SH3BP5/TREM2/PDGFC/BLK/IGF1/HGF/FYN/ITGB3/EPHB6/BTK/CD4/NEDD9/BST1/KDR/CD3E/STAP1/EPHA4/ANGPT1/JAK3/GPRC5B/PKDCC/FES/HTR2A/…
BP	GO:0030509	BMP signaling pathway	146	0.637007	1.96708	4.27178e-09	1.08388e-07	6.47568e-08	2978	tags=36%, list=15%, signal=31%	SFRP2/SFRP4/GREM1/CHRDL1/SFRP1/RBPMS2/RGMA/GREM2/FBN1/FSTL1/ROR2/COMP/SULF1/HTRA3/TMEM100/GPC3/TGFB3/SMAD9/ZNF423/HTRA1/CDH5/TGFB1/EGR1/ENG/TGFBR3/FSTL3/ACVRL1/BMP6/LEF1/RGMB/CHRD/SCX/TWSG1/BMPR2/CRIM1/TGFB2/NOTCH2/BMPR1B/SFRP5/SKIL/USP9Y/SMAD7/ACVR1/SKI/NBL1/BMPER/NOG/BMP8A/ABL1/RUNX2/LEFTY2/FST/GDF6
CC	GO:0031091	platelet alpha granule	89	0.698805	2.05373	4.31606e-09	1.09169e-07	6.52235e-08	1798	tags=40%, list=9%, signal=37%	ISLR/A2M/CLU/SELP/THBS1/SERPING1/F13A1/THBS2/PECAM1/FN1/MMRN1/SERPINE2/IGF2/TGFB3/PCDH7/VWF/SPARC/CD36/CFD/TIMP1/VEGFC/PROS1/TGFB1/SERPINE1/GAS6/SRGN/CD109/IGF1/HGF/ACTN1/ITGB3/F8/VEGFB/ACTN2/TGFB2/LHFPL2
BP	GO:0060326	cell chemotaxis	288	0.551887	1.77482	4.62813e-09	1.16698e-07	6.97217e-08	3105	tags=41%, list=16%, signal=35%	THBS4/CCL19/GREM1/SMOC2/CCL21/THBS1/PTN/CXCL12/JAM3/S1PR1/CH25H/SLIT2/DUSP1/FGFR1/CCL11/KIT/PDGFRB/RARRES2/GPR183/PDGFRA/CCL2/LPAR1/CXCR4/ITGA1/CCR7/CXCL14/VCAM1/FGF2/VEGFC/PDGFD/CXCL13/IL34/CHGA/PARVA/CYP7B1/SCG2/EDNRB/CSF1R/EGR3/SERPINE1/CAMK1D/GAS6/EDN1/PRKD1/ACKR3/AGTR1/PDE4B/NRP1/LEF1/MMP28/CX3CR1/CCR4/LOX/AIF1/HGF/NCKAP1L/IL16/C3AR1/C5AR1/CX3CL1/PIK3CG/ALOX5/CXCL17/RIN3/GPSM3/PIK3CD/CCL22/B…
BP	GO:0070661	leukocyte proliferation	304	0.545063	1.75665	4.68502e-09	1.17766e-07	7.03596e-08	3335	tags=39%, list=17%, signal=33%	CCL19/GREM1/CLU/IL33/CD79A/LRRC32/KIT/CR2/MS4A1/IGF2/MEF2C/GPR183/GPNMB/MSN/VCAM1/FGF10/IL6ST/IL34/TGFBR2/GAPT/CD22/CSF1R/PRNP/PTPRC/SASH3/IL7R/HLA-DPB1/LEF1/TYROBP/TREM2/BLK/IGF1/AIF1/NCKAP1L/FYN/TWSG1/MZB1/CX3CL1/TLR4/HLA-DPA1/BCL2/PIK3CG/PLCL2/CD19/BTK/CD4/SPN/VSIG4/RASAL3/DOCK8/BST1/DOCK2/MNDA/TNFSF8/BCL6/CARD11/CD3E/IRS2/TNFRSF13C/CD1D/MAPK8IP1/JAK3/STAT5B/PLA2G2D/CORO1A/LMO1/CD180/TAC1/LST1…
BP	GO:0042255	ribosome assembly	58	-0.693767	-2.34214	4.83546e-09	1.21171e-07	7.2394e-08	4562	tags=76%, list=23%, signal=58%	RPL3/MRPS11/MDN1/RPL6/RPS28/RSL24D1/MRPL20/RPL38/RPS10/RPL23A/EIF2A/RPS5/RPL24/MPV17L2/MRPL22/FASTKD2/XRCC5/TRAF7/RPS15/MRPS7/DHX37/DHX30/PPAN/MTERF3/RPLP0/DDX28/ABT1/RPS19/RRP7A/EIF6/RPF2/ERAL1/NIP7/PRKDC/MRTO4/BRIX1/RPSA/NLE1/NPM1/NOP2/C1QBP/RRS1/MRPS2/BOP1
BP	GO:0016579	protein deubiquitination	270	-0.428273	-1.7929	4.95162e-09	1.23699e-07	7.39043e-08	4923	tags=41%, list=25%, signal=31%	TNIP2/OTUD4/RHOA/OTUD3/TAB1/USP37/USP40/USP36/STAMBP/USP46/DESI2/USP7/NEDD8/USP18/BAP1/OTULIN/DDB2/USP9X/PSME4/USP24/TP53/PARK7/PSMD4/ENY2/PSMD6/SUDS3/NFRKB/USP5/HGS/OTUB2/PSMD10/SART3/PSMD7/PSMF1/PSMC1/PSMB6/PSMD1/TOMM20/KEAP1/PSMA6/USP28/PSMD8/PSMD5/PSMC3/TRRAP/PSMB10/MCRS1/OTUD6B/ATXN7L3/PSME1/YOD1/SPATA2/HCFC1/COPS5/FOXK2/RAD23A/RAD23B/POLB/VCP/USP39/PSMD12/UCHL3/USP10/PSMC6/OTUB1/USP14/PSMB9…
BP	GO:0018212	peptidyl-tyrosine modification	359	0.525072	1.71038	5.33337e-09	1.32825e-07	7.9357e-08	3749	tags=40%, list=19%, signal=33%	SFRP2/THBS4/GREM1/SFRP1/EFEMP1/DDR2/FGF7/CAV1/ROR2/FGFR1/EPHA3/PECAM1/KIT/AXL/IGF2/PDGFRB/PDGFRA/ENPP2/CSPG4/AGT/CNTN1/THY1/TEK/CD36/CTF1/ITGA5/FGF10/ISL1/EPHA7/PDGFD/IL6ST/IL34/TGFB1/TIE1/GHR/CRLF1/SPINK1/CSF1R/PRNP/ADRA2A/GAS6/PTPRC/TPST1/GHRL/HCLS1/VTN/BANK1/ROR1/NRP1/BMP6/DLG4/SH3BP5/TREM2/PDGFC/BLK/IGF1/HGF/FYN/ITGB3/EPHB6/BTK/CD4/NEDD9/BST1/KDR/CD3E/STAP1/EPHA4/ANGPT1/JAK3/GPRC5B/PKDCC/FES/…
CC	GO:0071013	catalytic step 2 spliceosome	84	-0.62133	-2.25678	5.35637e-09	1.32989e-07	7.94549e-08	5706	tags=79%, list=29%, signal=56%	SF3B1/DHX8/CWC15/PRPF4B/PRPF8/ZCCHC8/SF3A1/RBM22/SRRM1/DHX38/TFIP11/BCAS2/RBM8A/SNRPB2/ISY1/HNRNPH1/AQR/PLRG1/CRNKL1/SF3A3/SART1/BUD31/SNW1/DDX41/MAGOHB/PNN/HNRNPA3/HNRNPK/CDC5L/SF3B2/DDX23/RBMX/PRPF6/HNRNPM/SNRNP40/HNRNPR/HNRNPU/SF3A2/SNRNP200/LSM3/HNRNPC/SYNCRIP/SNRPD3/SNRPD2/HNRNPA1/MAGOH/SF3B6/LSM7/PRPF19/PABPC1/RALY/EFTUD2/HNRNPA2B1/LSM2/SF3B3/SRSF1/HNRNPF/SNRPE/PPIL1/EIF4A3/SNRPF/SNRPA1/SNR…
BP	GO:0008608	attachment of spindle microtubules to kinetochore	31	-0.800242	-2.38438	5.37514e-09	1.33047e-07	7.94894e-08	1210	tags=48%, list=6%, signal=45%	SEH1L/RCC2/BUB3/KNSTRN/NDC80/CENPE/NUF2/RACGAP1/SPAG5/AURKB/ECT2/NEK2/KIF2C/CCNB1/CDT1
BP	GO:0044774	mitotic DNA integrity checkpoint	100	-0.586708	-2.15956	5.59776e-09	1.38135e-07	8.25292e-08	2719	tags=44%, list=14%, signal=38%	CNOT3/RAD9A/MDC1/NBN/PIDD1/CDK5RAP3/HMGA2/CARM1/CNOT10/CASP2/RINT1/TRIAP1/PRMT1/NAE1/CDK2/E2F4/CCND1/TIPIN/MUC1/PRKDC/DONSON/CNOT11/BLM/TOPBP1/RFWD3/MSH2/EME1/CHEK2/TFDP1/CLSPN/FANCD2/E2F7/TICRR/CDC25C/E2F8/PCNA/GTSE1/ORC1/SFN/E2F1/CDC6/CDK1/CCNB1/AURKA
CC	GO:0071005	U2-type precatalytic spliceosome	49	-0.712363	-2.31621	5.82353e-09	1.43269e-07	8.55968e-08	4401	tags=76%, list=22%, signal=59%	RBMX2/SNRPB2/MFAP1/PRPF38A/SMU1/SF3A3/PRPF31/SART1/LSM8/DHX16/MAGOHB/BUD13/SF3B2/TXNL4A/PRPF6/LSM6/SF3B4/SF3A2/SF3B5/SNRNP200/LSM3/SNRPD3/SNRPD2/LSM7/EFTUD2/PHF5A/LSM5/LSM2/SF3B3/SNRPE/SNRPF/PRPF4/SNRPA1/SNRPG/LSM4/SNRPB/SNRPD1
BP	GO:0097064	ncRNA export from nucleus	36	-0.783173	-2.37104	6.07959e-09	1.49116e-07	8.90897e-08	3034	tags=81%, list=15%, signal=68%	NUP153/POM121/NUP93/NUP62/NUP98/NCBP2/SEC13/POM121C/NUP88/NUP160/NUP54/NUP107/NUP43/AAAS/NUP155/XPOT/SSB/NUP85/NUP35/SEH1L/NUP50/RAE1/NOL6/NPM1/NUP188/NUP205/NUP37/RAN/NDC1
BP	GO:0043414	macromolecule methylation	266	-0.428597	-1.79842	6.14771e-09	1.50331e-07	8.98158e-08	5665	tags=51%, list=29%, signal=37%	PCMTD2/SETD6/ICMT/FDXACB1/RNMT/MTRR/CXXC1/RAB3D/MTO1/NSUN4/WDR61/EMG1/KMT2D/PPM1D/TRMT13/TDRKH/EHMT1/KMT2B/PRMT7/ZNF335/NSUN6/ZMPSTE24/ETF1/EEF2KMT/SETDB1/TRMT61B/BAZ2A/VCPKMT/SETD1A/HENMT1/FAM98A/PLD6/MGMT/LCMT1/ZCCHC4/PAXBP1/METTL21A/GSPT1/METTL2B/PAGR1/MBD3/IWS1/TRMT5/RBM15B/EED/METTL15/TET3/METTL3/PHF19/SIRT7/PRDM4/PCMT1/PWP1/RIF1/CTR9/GSK3A/RAB6A/TDRD5/CTCF/CHTOP/FTSJ3/CAMKMT/ZFP57/MEPCE/CBL…
BP	GO:0002683	negative regulation of immune system process	372	0.51657	1.68523	6.89818e-09	1.68174e-07	1.00476e-07	3335	tags=36%, list=17%, signal=31%	APOD/GREM1/CCL21/SFRP1/A2M/IL33/THBS1/EMILIN1/FOXF1/SERPING1/FGL2/CXCL12/FBN1/LRRC32/COL3A1/SLIT2/DUSP1/TSC22D3/SYT11/AXL/LTF/GPNMB/CCL2/TGFB3/DTX1/THY1/HTRA1/MAFB/GLI3/CARTPT/TGFB1/LRRC17/CD200/CD22/PRNP/PTPRC/MILR1/CNR1/GPR68/FSTL3/IL7R/BANK1/TYROBP/MMP28/LAPTM5/INHBA/BLK/GPER1/IFI16/TWSG1/CX3CL1/TLR4/PLCL2/HLA-DOA/BTK/SPN/RIN3/VSIG4/CD84/MNDA/BCL6/PTGER4/STAP1/CD59/ANGPT1/JAK3/PLA2G2D/CST7/ADC…
BP	GO:1902750	negative regulation of cell cycle G2/M phase transition	101	-0.576787	-2.12809	7.51039e-09	1.8255e-07	1.09065e-07	3347	tags=58%, list=17%, signal=49%	PSMD10/PSMD7/PSMF1/PSMC1/PSMB6/PSMD1/PSMA6/PSMD8/PSMD5/PSMC3/PSMB10/PINX1/NBN/PSME1/CDK5RAP3/HMGA2/NABP2/PSMD12/PSMC6/PSMB9/PSMC2/PSMB2/PSMB4/PSMD13/PSMB1/RINT1/PSMA7/NAE1/PSMD11/PSMC4/PSME3/PSMB7/PSMB3/PSMA4/PSMA5/PSMA3/PSMB5/PSMD2/BRCC3/PSMB8/DONSON/BLM/TOPBP1/PSMD14/RAD21/BRCA1/PSMD3/PSME2/CLSPN/CHMP4C/CHEK1/TICRR/ORC1/DTL/CDC6/AURKB/CDK1/PLK1/AURKA
BP	GO:0030282	bone mineralization	107	0.669502	1.99738	7.57452e-09	1.83557e-07	1.09667e-07	2392	tags=39%, list=12%, signal=35%	MGP/GREM1/ASPN/DDR2/OMD/TMEM119/PTN/S1PR1/CLEC3B/ROR2/SLC24A3/COMP/LTF/MEF2C/GPC3/LTBP3/COL1A2/TGFB3/TGFB1/SRGN/BMP6/IGF1/LOX/ECM1/GPM6B/TWIST1/RSPO2/ALOX5/SLC8A1/KLF10/ADRB2/PKDCC/PTHLH/BMPR2/ANKH/P2RX7/KL/BMPR1B/PTH1R/FGR/ACVR1/SGMS2
BP	GO:0001935	endothelial cell proliferation	140	0.624064	1.9198	7.73725e-09	1.86941e-07	1.11689e-07	2847	tags=46%, list=14%, signal=39%	THBS4/THBS1/NGFR/CXCL12/CAV1/FGFR1/AKT3/VIP/SULF1/CCL11/APLNR/IGF2/MEF2C/CCL2/NRP2/PTPRM/TNFSF12/TEK/SPARC/CD34/GJA1/FGF2/VEGFC/TIE1/PPP1R16B/SCG2/EGR3/NR2F2/PRKD1/GHRL/AGTR1/ACVRL1/CAV2/NRP1/BMP6/ECM1/RGCC/ITGB3/ATOH8/ALOX5/APOE/PIK3CD/HTR2B/KDR/VASH1/VEGFB/ITGA4/TGFBR1/BMPR2/SEMA5A/FLT4/PLXNB3/NR4A1/APOA1/EGFL7/GATA2/COL4A3/STAT5A/BMPER/MMP14/FLT1/CCL26/PGF/F3
MF	GO:0030021	extracellular matrix structural constituent conferring compression resistance	22	0.9049	2.14889	7.78457e-09	1.87059e-07	1.11759e-07	1147	tags=50%, list=6%, signal=47%	OGN/PRELP/PODN/DCN/ASPN/LUM/FMOD/BGN/VCAN/HSPG2/PRG4
MF	GO:0015026	coreceptor activity	44	0.801739	2.16134	7.78834e-09	1.87059e-07	1.11759e-07	2622	tags=68%, list=13%, signal=59%	RGMA/NGFR/ROR2/RAMP2/RAMP1/RAMP3/CSPG4/GPC6/CXCR4/RECK/LRP1/ENG/TGFBR3/LY96/ACKR3/ROR1/NRP1/RGMB/ITGB3/CD4/FCRL1/ITGA4/CD28/GPR15/ITGAV/CCR5/CD8A/ITGB1/LILRA4/CD86
BP	GO:0007411	axon guidance	272	0.551717	1.77142	7.98011e-09	1.91098e-07	1.14172e-07	2945	tags=35%, list=15%, signal=30%	NEXN/BOC/NGFR/SLIT3/PALLD/CXCL12/NTN1/LAMA2/GFRA1/SLIT2/EPHA3/VSTM2L/PDLIM7/NRP2/NFASC/PTPRM/CXCR4/GLI3/ROBO1/ISL1/EPHA7/NTN4/SEMA3G/LRP1/NRXN3/EVL/SEMA3C/EGR2/CSF1R/SMO/GLI2/KLF7/NOTCH3/PLXNA4/L1CAM/FEZ1/SEMA6A/NRP1/PLA2G10/DOK5/NCAM1/CNTN4/PLXNC1/FLRT2/CHN1/CRMP1/SEMA6B/FYN/DPYSL2/EMB/SCN1B/PTCH1/EPHB6/GAP43/VLDLR/LAMB2/PIK3CD/NFIB/IRS2/SEMA6D/EPHA4/SEMA6C/GAB1/HOXA2/ROBO4/SEMA3E/BMPR2/GATA3/NO…
BP	GO:0007519	skeletal muscle tissue development	141	0.622134	1.91632	8.1347e-09	1.94225e-07	1.1604e-07	3743	tags=38%, list=19%, signal=31%	ELN/DCN/MYOCD/ASB2/SVIL/CAV1/HEYL/POPDC2/CFL2/MEOX2/IGF2/MEF2C/BVES/SMYD1/TCF21/MSC/TGFB1/EGR1/EGR2/NR2F2/SMO/VAMP5/MYOM1/NUPR1/CDON/BTG2/CAV2/HLF/SCX/TWIST1/BCL2/PAX5/RBM24/FOS/MYL6/MEF2D/CASQ1/ATF3/HDAC9/SKI/SOX8/HLX/CFLAR/KCNAB1/DLL1/HDAC4/HIVEP3/YBX3/KLHL41/EPHB1/ACTA1/COL19A1/P2RX2/NR1D2
BP	GO:0007062	sister chromatid cohesion	46	-0.720136	-2.29257	8.34052e-09	1.98553e-07	1.18626e-07	2601	tags=50%, list=13%, signal=44%	MCMBP/SMC3/AXIN2/ESCO1/SFPQ/CTNNB1/PDS5A/PHB2/DDX11/NAA50/NAA10/RAD21/SMC1A/ESCO2/KIF22/DSCC1/ESPL1/FEN1/BUB1B/BUB1/PLK1/CDCA5/CDC20
CC	GO:0032432	actin filament bundle	65	0.734302	2.08752	8.38001e-09	1.98909e-07	1.18839e-07	1361	tags=40%, list=7%, signal=37%	SYNPO2/MYL9/MYLK/SORBS1/PGM5/PDLIM3/CRYAB/FLNA/FERMT2/PALLD/SYNPO/FAM107A/LPP/LDB3/PDLIM4/PDLIM7/TPM1/TEK/MYH10/ABLIM3/ROR1/FHL3/ACTN1/LCP1/SHROOM4/ILK
BP	GO:0048705	skeletal system morphogenesis	207	0.581807	1.836	8.66098e-09	2.04976e-07	1.22464e-07	2616	tags=31%, list=13%, signal=27%	MGP/SFRP2/SFRP4/GREM1/SFRP1/TMEM119/MMP2/ROR2/FGFR1/COMP/ANXA6/LTF/MEF2C/PRRX1/PDGFRA/SIX2/LTBP3/TGFB3/TEK/HOXA4/GLI3/RAB23/TGFBR2/COL1A1/FOXN3/HOXA5/NKX3-2/BMP6/HOXB2/PKD1/SCX/THBS3/HHIP/TWIST1/RARB/PAX5/HOXB4/HOXA3/ARID5B/FOXC2/STC1/ALPL/HOXA2/TGFBR1/BMPR2/BMPR1B/CSGALNACT1/FUZ/CHST11/CSRNP1/FGF18/NPPC/MEF2D/FREM1/NDST1/DHRS3/FGR/SKI/CHAD/MMP14/MMP16/NOG/HAS2/SOX5
BP	GO:0006091	generation of precursor metabolites and energy	467	-0.351709	-1.53035	8.74433e-09	2.06346e-07	1.23282e-07	3927	tags=41%, list=20%, signal=33%	COX17/GSK3B/MDH1/TEFM/NDUFB10/CYBA/NDUFA7/GSK3A/SHPK/IDH3G/OXA1L/UQCRC2/NDUFB11/NDUFS5/ADPGK/PPP1CC/NDUFS1/NUP133/UQCRQ/IREB2/NDUFS8/AACS/COX7B/SPHK2/COQ9/NDUFS7/PFKL/SDHD/NDUFB2/ACO2/NUP153/FDX1/NDUFB6/DGUOK/COX7A2L/PGAM1/POM121/NDUFC1/NDUFA12/COX10/NDUFB4/NOA1/COX4I1/NDUFA10/NUP93/QDPR/PGM2/FXN/PDX1/SRD5A1/NUP62/ETFA/NUP98/COX15/KHK/GLDC/PDE12/UQCC2/COX6B1/GNPDA1/ABCD1/NDUFA1/SEC13/POM121C/NUP8…
BP	GO:0031503	protein-containing complex localization	272	-0.42306	-1.77147	8.9733e-09	2.10252e-07	1.25616e-07	4953	tags=46%, list=25%, signal=35%	SRRM1/ATAD1/TPR/SYMPK/DHX38/IFT43/THOC1/USP46/ATR/KIF3B/RALB/NUP214/POLDIP3/RBM8A/KIF5B/MIOS/DDX39B/THOC7/RAB8A/IWS1/RBM15B/AP2B1/CPSF2/PCID2/UPF1/ENY2/SDAD1/CHTOP/NUP133/AP3D1/NOP9/ZDHHC3/NMD3/MAGOHB/PABPN1/RAB11A/NUP153/TTC26/POM121/THOC2/SSX2IP/FIP1L1/AGFG1/SRSF6/NUP93/DAG1/NUP62/NUP98/NCBP1/U2AF2/SFPQ/DNM2/RPS15/NCBP2/SEC13/POM121C/NUP88/NUP160/NUP54/GPHN/SMG5/SRSF3/HNRNPU/SMG7/RNPS1/NUP107/N…
BP	GO:0050921	positive regulation of chemotaxis	137	0.634921	1.94426	8.97449e-09	2.10252e-07	1.25616e-07	3218	tags=48%, list=16%, signal=41%	THBS4/CCL19/SMOC2/CCL21/THBS1/PTN/CXCL12/S1PR1/SLIT2/FGFR1/PDGFRB/RARRES2/LPAR1/CXCR4/CCR7/CXCL14/FGF10/FGF2/VEGFC/PDGFD/CXCL13/IL34/TGFB1/SCG2/CSF1R/SERPINE1/CAMK1D/GAS6/EDN1/PRKD1/NRP1/TREM2/CCR4/AIF1/NCKAP1L/IL16/C3AR1/C5AR1/CXCL17/GPSM3/KDR/VEGFB/SWAP70/BMPR2/CMKLR1/SEMA5A/HSPB1/IL6R/FGF18/CD74/TIAM1/CCR2/CSF1/CCL5/PPM1F/P2RY12/CCL26/RAC2/PGF/F3/PLA2G7/TMSB4X/CCR1/MEGF8/TNFSF18/SUCNR1
BP	GO:1902903	regulation of supramolecular fiber organization	340	0.525683	1.70182	8.98778e-09	2.10252e-07	1.25616e-07	3202	tags=33%, list=16%, signal=28%	SYNPO2/LMOD1/CCL21/ELN/SFRP1/CRYAB/FLNA/CLIP3/CLU/AEBP1/MAP1B/EMILIN1/FERMT2/CXCL12/SVIL/S1PR1/SYNPO/MYOC/SLIT2/MAP1A/CFL2/TMOD1/CCL11/EFEMP2/GSN/CDC42EP3/TGFB3/PHLDB2/TPM1/LPAR1/DLC1/CCR7/CGNL1/MYADM/CDH5/RGS4/STMN2/RDX/EVL/ARHGEF15/EDN1/KANK3/HCLS1/NRP1/WASF3/ASAP3/NCKAP1L/RGCC/PLEKHH2/GMFG/DSTN/PFN2/ARHGAP6/ESAM/CYFIP2/CX3CL1/WAS/APOE/PTGER4/PREX1/CORO1A/SWAP70/CORO2B/ACTN2/ARHGEF10/TAC1/TGFBR…
BP	GO:0050680	negative regulation of epithelial cell proliferation	119	0.645487	1.95221	9.12905e-09	2.12941e-07	1.27222e-07	1789	tags=37%, list=9%, signal=34%	SFRP2/SFRP1/SERPINF1/THBS1/LIMS2/NGFR/PTN/CAV1/SULF1/KLF9/MEF2C/GPC3/CCL2/PTPRM/SPARC/GJA1/MCC/ROBO1/ISL1/TGFB1/WFDC1/TGFBR3/SCG2/NR2F2/CDKN1C/CD109/GHRL/NUPR1/CAV2/SNAI2/RGCC/PTCH1/ATOH8/ALOX5/MTSS1/APOE/CDKN2B/NFIB/VASH1/AR/TGFBR1/MAGED1/GATA3/TGFB2
MF	GO:0004518	nuclease activity	191	-0.475752	-1.92684	9.29851e-09	2.1627e-07	1.29212e-07	4148	tags=43%, list=21%, signal=35%	CNOT1/PNKP/ERI3/RAD1/CNOT6/DCPS/TOE1/DFFB/RPP38/FANCM/DROSHA/WRN/POP5/TSEN15/DIS3/CNOT7/RCL1/G3BP1/PPP1R8/EXOSC10/ELAC2/DBR1/XRN2/ERI2/TATDN1/REXO1/LACTB2/RPP21/ZGRF1/RAD9A/NTHL1/XRCC3/ERI1/PDE12/STK31/POP4/PIWIL1/APEX2/TSEN34/HELZ2/SND1/DXO/EXOSC3/TDP1/AGO2/ISG20L2/LAS1L/APEX1/EXOSC7/APTX/CPSF3/EXOSC9/DDX1/RBBP8/RPS3/NOB1/GEN1/RPP40/DCLRE1B/TSN/EXOSC2/MRPL44/AEN/POP1/EXOSC5/POLE/DCLRE1A/REXO4/PN…
BP	GO:0051303	establishment of chromosome localization	74	-0.645708	-2.28478	9.51756e-09	2.20731e-07	1.31877e-07	3223	tags=50%, list=16%, signal=42%	EML4/RAB11A/CHMP5/CHMP2B/KATNB1/CDC23/PINX1/CHAMP1/CHMP1A/NUP62/NUDC/HNRNPU/KPNB1/ZW10/SEH1L/SPDL1/CENPQ/RRS1/KIF14/CHMP4C/INCENP/KIF22/NDC80/CENPE/PSRC1/KIF18A/NUF2/DLGAP5/KIFC1/SPAG5/CENPF/AURKB/CDCA8/KIF2C/CCNB1/CDT1/CDCA5
BP	GO:0050000	chromosome localization	76	-0.627061	-2.23518	9.74484e-09	2.25356e-07	1.3464e-07	3223	tags=49%, list=16%, signal=41%	EML4/RAB11A/CHMP5/CHMP2B/KATNB1/CDC23/PINX1/CHAMP1/CHMP1A/NUP62/NUDC/HNRNPU/KPNB1/ZW10/SEH1L/SPDL1/CENPQ/RRS1/KIF14/CHMP4C/INCENP/KIF22/NDC80/CENPE/PSRC1/KIF18A/NUF2/DLGAP5/KIFC1/SPAG5/CENPF/AURKB/CDCA8/KIF2C/CCNB1/CDT1/CDCA5
BP	GO:0030098	lymphocyte differentiation	351	0.524208	1.70387	9.84883e-09	2.27112e-07	1.35689e-07	3324	tags=39%, list=17%, signal=33%	CCL19/SFRP1/FGL2/CD79A/KIT/ITM2A/CR2/MS4A1/AXL/GPR183/TOX/ITPKB/DTX1/CCR7/CD79B/VCAM1/MAFB/GLI3/ZBTB16/EGR1/LGALS1/TGFBR2/FZD7/DOCK11/LEPR/EGR3/GAS6/PTPRC/CD27/GLI2/IKZF1/SASH3/IL7R/LEF1/LYL1/INHBA/MFNG/NCKAP1L/SLAMF6/BCL2/POU2AF1/PLCL2/HLA-DOA/CD19/BTK/DOCK10/CD4/SPN/RORA/PIK3CD/DOCK2/TNFSF8/BCL6/CD2/CARD11/CD3E/PTGER4/CD1D/ITGA4/JAK3/PREX1/STAT5B/PLA2G2D/CD3D/SPINK5/GATA3/CD28/NOTCH2/HDAC5/PLCG…
BP	GO:0022616	DNA strand elongation	25	-0.84812	-2.39464	1.04697e-08	2.40743e-07	1.43833e-07	1295	tags=68%, list=7%, signal=64%	DCLRE1B/POLE/POLD3/GINS3/POLE3/GINS4/LIG1/DNA2/RFC4/POLD2/MCM3/RFC3/GINS1/PCNA/MCM7/GINS2/MCM4
BP	GO:0006271	DNA strand elongation involved in DNA replication	19	-0.894121	-2.32692	1.05918e-08	2.42861e-07	1.45098e-07	1009	tags=84%, list=5%, signal=80%	POLE/POLD3/GINS3/POLE3/GINS4/LIG1/DNA2/RFC4/POLD2/MCM3/RFC3/GINS1/PCNA/MCM7/GINS2/MCM4
BP	GO:0019722	calcium-mediated signaling	192	0.592003	1.86521	1.0925e-08	2.49793e-07	1.4924e-07	3753	tags=45%, list=19%, signal=37%	PLN/RCAN2/SELP/CASQ2/ATP1A2/ATP2B4/DMPK/TMEM100/CXCR4/DMD/CCR7/ANK2/CLIC2/VCAM1/CACNA1C/ITPR1/NFATC4/CD22/EDNRB/PRNP/PTPRC/EDN1/ACKR3/AGTR1/PTGFR/TREM2/CX3CR1/CCR4/IGF1/LRRK2/SELE/LMCD1/AKAP6/AVPR1A/BTK/CD4/HTR2B/BST1/SLC8A1/NMUR1/NFATC1/KDR/CD3E/CMKLR1/PLCG2/P2RX7/GSTM2/LAT2/TBC1D10C/CASQ1/MCTP1/SLC8A2/CCR2/CCR5/EGFR/PLEK/NFATC2/FHL2/TRAT1/RCAN1/PPP3CB/RYR2/GRIN2A/HOMER3/XCR1/ZAP70/P2RY12/CXCR3/…
BP	GO:0003205	cardiac chamber development	146	0.629433	1.94369	1.11831e-08	2.54974e-07	1.52335e-07	2541	tags=34%, list=13%, signal=30%	SFRP2/CPE/HAND2/FOXF1/SLIT3/MYOCD/ADAMTS1/HEYL/SLIT2/HEG1/MEF2C/NRP2/TPM1/ANK2/TEK/PDE2A/ROBO1/ISL1/TGFB1/TGFBR2/ENG/TGFBR3/PARVA/SEMA3C/SMO/ZFPM2/SMARCD3/CITED2/NRP1/GJA5/RBP4/RARB/LMO4/FOXC2/KCNK2/TGFBR1/TBX2/BMPR2/GATA3/TGFB2/NOTCH2/PLXND1/HEY2/NDST1/SMAD7/DHRS3/ACVR1/FHL2/RYR2/NOG
BP	GO:0007006	mitochondrial membrane organization	112	-0.554221	-2.10101	1.12796e-08	2.56454e-07	1.53219e-07	4156	tags=53%, list=21%, signal=42%	YWHAQ/TP53/CHCHD6/GSK3B/RHOT2/HEBP2/MFN1/GSK3A/OXA1L/COX18/TIMM22/SAMM50/OPA1/ZNF205/TMEM11/HIP1R/TIMM9/BBC3/TP73/HSPA4/VDAC2/TMEM102/YWHAG/CASP8/ROMO1/GHITM/IMMT/BCS1L/MTX1/PDCD5/TMEM14A/AFG3L2/TIMM50/DNAJC11/TIMM8B/GZMB/UQCC3/BCL2L1/YWHAZ/TIMM10/BID/HSP90AA1/MTX2/YWHAE/CHCHD3/PMAIP1/TIMM13/LETM1/APOO/BAK1/SLC25A5/TOMM22/CHCHD10/HSPA9/TFDP1/PPIF/SFN/HK2/E2F1
BP	GO:0032835	glomerulus development	61	0.747533	2.09737	1.1317e-08	2.56582e-07	1.53296e-07	3082	tags=57%, list=16%, signal=49%	ACTA2/HEYL/WWTR1/SULF1/PECAM1/PDGFRB/MEF2C/PDGFRA/BASP1/NID1/TEK/TCF21/CD34/PDGFD/EGR1/COL4A4/BCL2/MTSS1/LAMB2/FOXC2/ANGPT1/KLF15/NOTCH2/SULF2/IL6R/ADIPOQ/MAGI2/RET/COL4A3/NOG/GPR4/OSR1/CFLAR/PLCE1/ENPEP
BP	GO:0034329	cell junction assembly	409	0.508224	1.65865	1.13886e-08	2.57484e-07	1.53835e-07	4118	tags=39%, list=21%, signal=32%	APOD/FLNC/GREM1/SFRP1/SORBS1/FLNA/MAP1B/THBS1/LIMS2/FERMT2/CLDN5/JAM3/NTN1/CAV1/MYOC/RAMP2/FAM107A/CDH11/EPHA3/CNTNAP1/PECAM1/FN1/HEG1/MEF2C/LGI2/PHLDB2/GPBAR1/AGT/DLC1/GPC6/DCHS1/THY1/TEK/SPOCK2/PTPRS/SRPX2/GJA1/ITGA5/COL16A1/EPHA7/CDH5/LRP1/GJA4/NLGN2/SYNDIG1/GHRL/GJC1/CLDN11/VCL/NRXN2/TLN1/DST/ACVRL1/NRP1/SNAI2/OBSL1/FZD1/FLRT2/GJA5/PCDH17/GPM6B/PCDHB4/ACTN1/MACF1/ARHGAP6/ESAM/LAMC1/CLSTN3/ILK…
BP	GO:0070372	regulation of ERK1 and ERK2 cascade	275	0.545214	1.75074	1.15892e-08	2.61291e-07	1.56109e-07	3588	tags=39%, list=18%, signal=33%	CCL19/FBLN1/CCL21/HAND2/AKAP12/EMILIN1/FERMT2/DUSP1/TIMP3/CCL11/RAMP3/FN1/PDGFRB/GPR183/PDGFRA/GPNMB/CCL2/GPBAR1/CCR7/TEK/CD36/F2R/PSCA/TNFAIP8L3/FGF10/FGF2/EPHA7/PDGFD/TGFB1/LRP1/GLIPR2/CSF1R/GAS6/PTPRC/RRAS/ACKR3/SEMA6A/NRP1/TREM2/PDGFC/LMO3/SCIMP/MTURN/GPER1/C5AR1/CX3CL1/TLR4/PLA2G5/APOE/CD4/CCL22/HTR2B/SPRY1/KDR/ANGPT1/MAP3K12/DUSP26/ADCYAP1/CCL14/NOTCH2/HTR2A/ADIPOQ/FLT4/DUSP3/FGF18/NDRG2/GN…
BP	GO:0050878	regulation of body fluid levels	482	0.490435	1.60415	1.16884e-08	2.62105e-07	1.56596e-07	3769	tags=34%, list=19%, signal=28%	MYL9/FBLN1/FLNA/A2M/SELP/THBS1/ADCY5/SERPING1/F13A1/CAV1/EHD2/CSRP1/COL3A1/PRKAR2B/AQP1/VIP/COMP/AXL/FN1/HEG1/MMRN1/SERPINE2/APLNR/PRKCB/PDGFRA/COL1A2/THBD/VWF/NPR1/PRKG1/CD34/CD36/F2R/GJA1/FGF10/F2RL3/CDO1/ITPR1/PRKACB/PROS1/C1QTNF1/DOCK11/COL1A1/F2RL2/EDNRB/SERPINE1/ADRA2A/GAS6/ZFPM2/EDN1/PLAT/FAP/EHD3/PDPN/ENTPD1/FLI1/VCL/GNG2/VTN/TLN1/PAM/PEAR1/BLK/GJA5/ST3GAL4/GNA14/FYN/ADCY4/ILK/WAS/TLR4/TF…
CC	GO:1990204	oxidoreductase complex	98	-0.588011	-2.15511	1.16902e-08	2.62105e-07	1.56596e-07	3857	tags=55%, list=20%, signal=45%	NDUFB10/CYBA/NDUFA7/UQCRC2/NDUFB11/NDUFS5/NDUFS1/UQCRQ/NDUFS8/NDUFS7/SDHD/NDUFB2/PDK1/NDUFB6/NDUFC1/NDUFA12/NDUFB4/NDUFA10/GLDC/NDUFA1/NDUFA9/SDHB/NDUFA8/NDUFAB1/GPD2/NDUFA6/BCS1L/DLD/UQCR10/NDUFS3/NDUFB9/NDUFS2/PDHX/NDUFB3/GCSH/UQCRHL/P4HB/UQCC3/NDUFV1/FOXRED1/NDUFS6/NOXA1/NOX1/UQCRFS1/UQCRH/PDHA1/SDHA/DLAT/DUOX2/UQCRC1/CYB5B/KAT2A/RRM1/CYC1
BP	GO:0002696	positive regulation of leukocyte activation	311	0.535389	1.72942	1.17597e-08	2.62937e-07	1.57092e-07	3832	tags=45%, list=19%, signal=37%	CCL19/CCL21/IL33/THBS1/CAV1/AXL/IGF2/MEF2C/GPR183/CCL2/TOX/ITPKB/CCR7/THY1/IGLL5/VCAM1/NR4A3/FGF10/GLI3/ZBTB16/IL6ST/TGFB1/LGALS1/TGFBR2/EGR3/GAS6/PTPRC/CD27/GLI2/SASH3/IL7R/HLA-DPB1/LEF1/TYROBP/TREM2/IGF1/AIF1/NCKAP1L/LRRK2/FYN/ITGAM/CD5/TLR4/HLA-DPA1/BCL2/BTK/CD4/RASAL3/DOCK8/BST1/BCL6/CD2/CARD11/CD3E/IRS2/TNFRSF13C/STAP1/CD1D/JAK3/STAT5B/CORO1A/TAC1/TNFSF13B/GATA3/CD28/ZMIZ1/TESPA1/CD40LG/ITGB…
BP	GO:0051310	metaphase plate congression	63	-0.666827	-2.2722	1.21259e-08	2.69484e-07	1.61004e-07	3223	tags=56%, list=16%, signal=47%	EML4/RAB11A/CHMP5/CHMP2B/CDC23/PINX1/CHAMP1/CHMP1A/NUP62/NUDC/HNRNPU/KPNB1/ZW10/SEH1L/SPDL1/CENPQ/RRS1/KIF14/CHMP4C/INCENP/KIF22/NDC80/CENPE/PSRC1/KIF18A/NUF2/KIFC1/SPAG5/CENPF/AURKB/CDCA8/KIF2C/CCNB1/CDT1/CDCA5
BP	GO:0071772	response to BMP	159	0.613461	1.90402	1.21524e-08	2.69484e-07	1.61004e-07	2978	tags=35%, list=15%, signal=30%	SFRP2/SFRP4/GREM1/CHRDL1/SFRP1/RBPMS2/RGMA/GREM2/FBN1/FSTL1/HEYL/ROR2/COMP/SULF1/HTRA3/TMEM100/GPC3/TGFB3/SMAD9/ZNF423/HTRA1/CDH5/TGFB1/EGR1/ENG/TGFBR3/FSTL3/ACVRL1/BMP6/LEF1/RGMB/CHRD/SCX/TWSG1/BMPR2/CRIM1/GATA3/TGFB2/NOTCH2/BMPR1B/SFRP5/SKIL/USP9Y/SMAD7/ACVR1/SKI/NBL1/BMPER/ADAMTS12/NOG/BMP8A/ABL1/RUNX2/LEFTY2/FST/GDF6
BP	GO:0071773	cellular response to BMP stimulus	159	0.613461	1.90402	1.21524e-08	2.69484e-07	1.61004e-07	2978	tags=35%, list=15%, signal=30%	SFRP2/SFRP4/GREM1/CHRDL1/SFRP1/RBPMS2/RGMA/GREM2/FBN1/FSTL1/HEYL/ROR2/COMP/SULF1/HTRA3/TMEM100/GPC3/TGFB3/SMAD9/ZNF423/HTRA1/CDH5/TGFB1/EGR1/ENG/TGFBR3/FSTL3/ACVRL1/BMP6/LEF1/RGMB/CHRD/SCX/TWSG1/BMPR2/CRIM1/GATA3/TGFB2/NOTCH2/BMPR1B/SFRP5/SKIL/USP9Y/SMAD7/ACVR1/SKI/NBL1/BMPER/ADAMTS12/NOG/BMP8A/ABL1/RUNX2/LEFTY2/FST/GDF6
CC	GO:0031252	cell leading edge	400	0.50797	1.65669	1.24292e-08	2.74869e-07	1.64222e-07	3546	tags=36%, list=18%, signal=30%	ACTG2/MYLK/ACTA2/DPYSL3/FERMT2/PALLD/ANTXR1/ITGA8/SGCE/FAM107A/PALM/VIM/PDLIM4/GSN/PDLIM7/LAYN/ARHGEF26/PHLDB2/TPM1/PTPRM/APBB1/PSD/CSPG4/PKD2/DLC1/PLEKHO1/CXCR4/GABARAPL1/ACTC1/THY1/MYADM/WIPF1/MCC/ITGA5/ARHGEF6/LDB2/ARHGAP31/WLS/RASGRP2/MYH10/STMN2/PARVA/RDX/EVL/FGD5/SORBS2/LAMP5/FAP/SH2D3C/PDPN/TLN1/ABLIM3/DST/PTPN13/WASF3/AIF1/ASAP3/PLEKHH2/SCIMP/GPER1/ACTN1/MACF1/LCP1/APBB1IP/ILK/CYTH3/TLR4/…
BP	GO:0006409	tRNA export from nucleus	32	-0.787161	-2.33904	1.25548e-08	2.76136e-07	1.64979e-07	3034	tags=84%, list=15%, signal=72%	NUP153/POM121/NUP93/NUP62/NUP98/SEC13/POM121C/NUP88/NUP160/NUP54/NUP107/NUP43/AAAS/NUP155/XPOT/SSB/NUP85/NUP35/SEH1L/NUP50/RAE1/NOL6/NUP188/NUP205/NUP37/RAN/NDC1
BP	GO:0071431	tRNA-containing ribonucleoprotein complex export from nucleus	32	-0.787161	-2.33904	1.25548e-08	2.76136e-07	1.64979e-07	3034	tags=84%, list=15%, signal=72%	NUP153/POM121/NUP93/NUP62/NUP98/SEC13/POM121C/NUP88/NUP160/NUP54/NUP107/NUP43/AAAS/NUP155/XPOT/SSB/NUP85/NUP35/SEH1L/NUP50/RAE1/NOL6/NUP188/NUP205/NUP37/RAN/NDC1
BP	GO:0060401	cytosolic calcium ion transport	166	0.610667	1.90746	1.31566e-08	2.8859e-07	1.72419e-07	2563	tags=33%, list=13%, signal=29%	PLN/CCL19/CCL21/JPH2/CASQ2/CAV1/ATP1A2/ATP2B4/MS4A1/RAMP3/APLNR/CACNA2D1/PKD2/DMD/CCR7/THY1/ANK2/CLIC2/F2R/F2RL3/CACNA1C/FGF2/ITPR1/PRNP/PTPRC/TRPC1/GPER1/FYN/CX3CL1/ATP2A3/AKAP6/BCL2/RGS9/CD19/CD4/MICU3/HTR2B/SLC8A1/RASA3/CORO1A/PLCG2/HTR2A/P2RX7/GSTM2/BDKRB1/PDE4D/CASQ1/SLC8A2/CCR5/SNCA/ITPR2/TRPV2/RYR2/GRIN2A/XCR1
BP	GO:0050804	modulation of chemical synaptic transmission	395	0.509371	1.66201	1.32184e-08	2.89161e-07	1.7276e-07	4124	tags=37%, list=21%, signal=30%	TACR2/AKAP12/MAP1B/PTN/LAMA2/ATP1A2/SNCG/ROR2/MAP1A/PRKAR2B/FAM107A/CDH11/SYT11/KIT/DMPK/SERPINE2/PRKCB/MEF2C/TSHZ3/CCL2/NCS1/NPTXR/PTPRS/GRIK5/RGS4/CHRNA3/NLGN2/NFATC4/EGR2/GNAI1/BCHE/ADRA2A/SRGN/EDN1/LZTS1/GHRL/CACNB2/CNR1/DLG4/SORCS2/SYNGR1/TYROBP/CX3CR1/ZDHHC2/CNTN4/BACE1/LRRK2/PCDH17/GPER1/PLCB4/FYN/SNAP25/VAMP2/CX3CL1/CLSTN3/NPTX1/PLCL2/P2RX1/APOE/PLCL1/CACNG4/EPHA4/ADRB2/TAC1/ADCYAP1/RASGR…
BP	GO:0042110	T cell activation	461	0.491291	1.60515	1.32958e-08	2.90071e-07	1.73304e-07	3830	tags=39%, list=19%, signal=33%	CCL19/CCL21/FGL2/LRRC32/CAV1/KIT/IGF2/GSN/GPR183/GPNMB/CCL2/TOX/ITPKB/DTX1/CCR7/THY1/MSN/VCAM1/MAFB/GLI3/ZBTB16/CD1C/IL6ST/EGR1/LGALS1/TGFBR2/FZD7/LEPR/EGR3/PRNP/PTPRC/CD27/GLI2/SASH3/IL7R/HLA-DPB1/LEF1/LAPTM5/IGF1/AIF1/NCKAP1L/SLAMF6/FYN/LCP1/TWSG1/APBB1IP/WDFY4/CD5/WAS/ITGAL/HLA-DPA1/BCL2/PIK3CG/HLA-DOA/CD4/SPN/RORA/VSIG4/PIK3CD/RASAL3/DOCK8/DOCK2/TNFSF8/BCL6/CD2/CARD11/CD3E/PTGER4/TNFRSF13C/CD…
MF	GO:0017116	single-stranded DNA helicase activity	19	-0.891834	-2.32097	1.35069e-08	2.93884e-07	1.75582e-07	1635	tags=84%, list=8%, signal=77%	DHX9/PIF1/WRNIP1/RFC5/DNA2/MCM5/RFC2/MCM6/POLQ/CHTF18/DSCC1/RFC4/RAD51/RFC3/MCM7/MCM2
BP	GO:0001936	regulation of endothelial cell proliferation	126	0.637444	1.93593	1.45061e-08	3.14778e-07	1.88065e-07	2401	tags=44%, list=12%, signal=39%	THBS4/THBS1/NGFR/CXCL12/CAV1/FGFR1/AKT3/VIP/SULF1/CCL11/APLNR/IGF2/MEF2C/CCL2/NRP2/PTPRM/TNFSF12/TEK/SPARC/GJA1/FGF2/VEGFC/TIE1/PPP1R16B/SCG2/EGR3/NR2F2/PRKD1/GHRL/AGTR1/ACVRL1/CAV2/NRP1/BMP6/ECM1/RGCC/ITGB3/ATOH8/ALOX5/APOE/PIK3CD/HTR2B/KDR/VASH1/VEGFB/ITGA4/TGFBR1/BMPR2/SEMA5A/FLT4/PLXNB3/NR4A1/EGFL7/GATA2/COL4A3/STAT5A
CC	GO:0071011	precatalytic spliceosome	51	-0.70552	-2.28755	1.45676e-08	3.15268e-07	1.88358e-07	4401	tags=82%, list=22%, signal=64%	PRPF38B/RNF113A/SF3A1/PRPF3/RBMX2/SNRPB2/MFAP1/PRPF38A/SMU1/SF3A3/PRPF31/SART1/LSM8/DHX16/MAGOHB/BUD13/SF3B2/TXNL4A/PRPF6/LSM6/SF3B4/SF3A2/SF3B5/SNRNP200/LSM3/SNRPD3/SNRPD2/SF3B6/LSM7/EFTUD2/PHF5A/LSM5/LSM2/SF3B3/SNRPE/SNRPF/PRPF4/SNRPA1/SNRPG/LSM4/SNRPB/SNRPD1
CC	GO:0042641	actomyosin	68	0.729936	2.07927	1.54221e-08	3.32871e-07	1.98875e-07	2899	tags=51%, list=15%, signal=44%	SYNPO2/MYL9/MYLK/SORBS1/PGM5/PDLIM3/FERMT2/PALLD/SYNPO/FAM107A/LPP/LDB3/PDLIM4/PDLIM7/TPM1/TEK/MYH10/ABLIM3/ROR1/FHL3/ACTN1/LCP1/SHROOM4/ILK/KAT2B/LIMCH1/ZYX/DBN1/LURAP1/NOX4/CDC42BPA/FSCN1/PDLIM5/FBLIM1/BAG3
BP	GO:0051031	tRNA transport	35	-0.782093	-2.37184	1.59619e-08	3.43577e-07	2.05271e-07	3123	tags=83%, list=16%, signal=70%	TOMM20/NUP153/POM121/NUP93/NUP62/NUP98/SEC13/POM121C/NUP88/YBX1/NUP160/NUP54/NUP107/NUP43/AAAS/NUP155/XPOT/SSB/NUP85/NUP35/SEH1L/NUP50/RAE1/NOL6/NUP188/NUP205/NUP37/RAN/NDC1
BP	GO:0006333	chromatin assembly or disassembly	142	-0.518343	-2.03291	1.6003e-08	3.43577e-07	2.05271e-07	3740	tags=46%, list=19%, signal=37%	SPTY2D1/CTCF/GRWD1/SIRT6/CDAN1/SART3/BRD2/RBBP4/RBBP7/NAP1L4/SMARCD1/MIS18BP1/IPO4/CDKN2A/PARP10/HIRA/HMGA2/NFE2/LIN54/DAXX/ITGB3BP/SUPT16H/SMARCB1/SMARCA4/MTA2/HAT1/SMARCC1/HMGB1/ANP32B/CENPL/BEND3/HDAC1/SUV39H2/CENPV/CENPK/CENPQ/SMARCD2/NASP/DNMT1/TRIM28/CENPI/RUVBL1/POLE3/SOX9/NPM1/HELLS/SET/NOC2L/CENPO/SUV39H1/CHAF1A/HMGB2/CENPN/CHAF1B/CENPH/CENPW/CENPU/MIS18A/OIP5/HMGA1/CENPM/HJURP/CENPA/MCM…
BP	GO:0006937	regulation of muscle contraction	148	0.616423	1.90753	1.66206e-08	3.55744e-07	2.12541e-07	2584	tags=33%, list=13%, signal=29%	HSPB6/CNN1/PLN/MYL9/PPP1R12B/TACR2/KCNMA1/CASQ2/MYOCD/CAV1/ATP1A2/KIT/ANXA6/RGS2/DMPK/TPM1/DMD/PRKG1/ANK2/CLIC2/F2R/CHRM2/CALCRL/CACNA1C/CHRNA3/CHGA/ADRA2A/EDN1/EHD3/GHRL/PDE4B/GJA5/GPER1/PIK3CG/P2RX1/TBXA2R/SLC8A1/STC1/ADRB2/PTAFR/GSTM2/PDE4D/CASQ1/SMAD7/CTNNA3/DAPK3/RYR2/TACR1/DOCK4
BP	GO:0110148	biomineralization	154	0.615787	1.90506	1.66577e-08	3.55744e-07	2.12541e-07	2392	tags=32%, list=12%, signal=29%	MGP/GREM1/ASPN/DDR2/OMD/TMEM119/PTN/S1PR1/CLEC3B/ROR2/SLC24A3/COMP/LTF/MEF2C/GPC3/LTBP3/COL1A2/TGFB3/FAM20C/TGFB1/COL1A1/GAS6/SRGN/BMP6/IGF1/LOX/ECM1/GPM6B/TWIST1/RSPO2/FAM20A/ALOX5/SLC8A1/ALPL/KLF10/ODAM/ADRB2/PKDCC/PTHLH/BMPR2/ANKH/P2RX7/KL/BMPR1B/NOS3/HEY2/PTH1R/FGR/ACVR1/SGMS2
BP	GO:0000184	nuclear-transcribed mRNA catabolic process, nonsense-mediated decay	119	-0.53917	-2.07483	1.67359e-08	3.56474e-07	2.12977e-07	5832	tags=71%, list=30%, signal=51%	UBA52/SMG8/RPL27A/RPL39/RPL28/RPL17/RPL37/RPS14/RPL5/RPS27A/PPP2CA/ETF1/RPS20/RPL31/RPS24/RPS29/RPS8/RPL3/SMG9/RBM8A/RPL6/RPS28/RPL9/RPL30/PPP2R1A/RPS11/GSPT1/RPL36/RPS3A/RPS13/RPL4/RPS17/RPL35A/RPL32/RPL41/UPF1/RPL38/RPS10/SKIV2L/RPS12/RPS16/RPL23A/RPL18A/RPS26/RPS4X/EXOSC10/MAGOHB/RPS5/RPL24/RPLP2/RPS6/RPL37A/RPL36A/RPL19/RPL35/NCBP1/PPP2R2A/RPS15/NCBP2/SMG5/SMG7/RPL7/HELZ2/RPL14/RNPS1/UPF3B/DH…
BP	GO:0031055	chromatin remodeling at centromere	28	-0.827955	-2.38233	1.75333e-08	3.71956e-07	2.22227e-07	1208	tags=68%, list=6%, signal=64%	CENPL/CENPV/CENPK/CENPQ/NASP/CENPI/RUVBL1/NPM1/HELLS/CENPO/CENPN/CENPH/CENPW/CENPU/MIS18A/OIP5/CENPM/HJURP/CENPA
BP	GO:0006400	tRNA modification	82	-0.610765	-2.19827	1.75546e-08	3.71956e-07	2.22227e-07	5800	tags=67%, list=29%, signal=48%	TYW3/ALKBH1/ELP4/ELP5/MTO1/TRMT13/NSUN6/PUS3/MOCS3/TRMT61B/MTFMT/KTI12/ELP3/METTL2B/TRMT5/C9orf64/ELP6/QTRT1/DUS2/METTL1/TRIT1/THUMPD2/TARBP1/TRMT10A/TRMT112/THUMPD3/CTU1/METTL2A/URM1/DUS4L/TPRKB/DUS3L/TRMT61A/CTU2/TRUB1/ADAT2/FTSJ1/CDK5RAP1/TRMT6/TRMT11/ADAT3/WDR4/SSB/TRMU/PUSL1/TRMT1/AARS2/GTPBP3/HSD17B10/PUS1/TRMT10C/NSUN2/DUS1L/NAT10/PUS7
BP	GO:0044843	cell cycle G1/S phase transition	262	-0.417459	-1.74083	1.76946e-08	3.73456e-07	2.23122e-07	2109	tags=32%, list=11%, signal=29%	CARM1/MTBP/ZPR1/CNOT10/EIF4E/CASP2/POLA1/E2F3/DDRGK1/CDK4/APEX1/CDC34/CUL4A/TRIAP1/PRMT1/CDK2/E2F4/PSME3/MYC/EIF4G1/CCNE2/ORC5/PHB2/MCM8/CDK5/PRIM2/CCND1/BID/MUC1/PRKDC/POLE/RPA3/RBL1/NASP/CNOT11/DHFR/POLE3/PRIM1/RFWD3/FBXO5/POLA2/CDK16/MCM5/POLE2/CDC7/CHEK2/PSME2/MCM6/TFDP1/E2F7/KIF14/PPAT/GMNN/DBF4/EIF4EBP1/CDC25C/ORC6/E2F8/MCM10/SKP2/MCM3/EZH2/RCC1/PCNA/IQGAP3/GTSE1/MCM7/ORC1/CDKN3/SFN/MCM4/CD…
BP	GO:0002062	chondrocyte differentiation	95	0.684165	2.02208	1.77177e-08	3.73456e-07	2.23122e-07	2978	tags=49%, list=15%, signal=42%	SFRP2/GREM1/EFEMP1/COMP/SULF1/ANXA6/MEF2C/SIX2/LTBP3/MAF/GLI3/ZBTB16/TGFB1/TGFBR2/WNT9A/GLI2/TGFBI/WNT2B/NKX3-2/TRPS1/ACVRL1/CYTL1/BMP6/SNAI2/ECM1/SCX/RARB/NFIB/PKDCC/TGFBR1/PTHLH/BMPR2/SULF2/BMPR1B/CHST11/CREB3L2/FGF18/NPPC/MEF2D/PTH1R/SMAD7/ADAMTS12/SNX19/SOX5/OSR1/RUNX2/GDF6
MF	GO:0003678	DNA helicase activity	69	-0.65557	-2.24415	1.8748e-08	3.94147e-07	2.35484e-07	3458	tags=57%, list=18%, signal=47%	FANCM/WRN/ERCC2/G3BP1/ASCC3/CHD1L/RAD54B/XRCC5/GTF2F2/CHD7/SUPV3L1/DHX9/PIF1/XRCC6/WRNIP1/MCM8/DDX11/BRIP1/BLM/RUVBL1/RFC5/RUVBL2/DNA2/MCM5/RFC2/MCM6/ERCC6L/POLQ/CHTF18/DSCC1/RFC4/RAD51/MCM3/RFC3/RAD54L/MCM7/MCM4/MCM2/RECQL4
BP	GO:0031214	biomineral tissue development	152	0.619228	1.91699	1.92007e-08	4.00557e-07	2.39314e-07	2392	tags=33%, list=12%, signal=29%	MGP/GREM1/ASPN/DDR2/OMD/TMEM119/PTN/S1PR1/CLEC3B/ROR2/SLC24A3/COMP/LTF/MEF2C/GPC3/LTBP3/COL1A2/TGFB3/FAM20C/TGFB1/COL1A1/GAS6/SRGN/BMP6/IGF1/LOX/ECM1/GPM6B/TWIST1/RSPO2/FAM20A/ALOX5/SLC8A1/ALPL/KLF10/ODAM/ADRB2/PKDCC/PTHLH/BMPR2/ANKH/P2RX7/KL/BMPR1B/NOS3/HEY2/PTH1R/FGR/ACVR1/SGMS2
BP	GO:0045766	positive regulation of angiogenesis	148	0.61536	1.90424	1.9222e-08	4.00557e-07	2.39314e-07	2847	tags=43%, list=14%, signal=37%	HSPB6/SFRP2/GREM1/PTGIS/SMOC2/CYP1B1/THBS1/C3/AKT3/RAMP2/AQP1/CCL11/APLNR/PRKCB/CXCR4/TNFSF12/RHOB/TEK/CD34/ITGA5/FGF2/VEGFC/ISL1/CDH5/TIE1/TGFBR2/ENG/SERPINE1/RRAS/PRKD1/GHRL/ETS1/CX3CR1/ECM1/HGF/C3AR1/TWIST1/C5AR1/CMA1/SASH1/PIK3CD/TBXA2R/KDR/VEGFB/FOXC2/CYBB/GAB1/SEMA5A/ITGB2/HSPB1/FGF18/CD40/NOS3/ITGAX/GATA2/ITGB1/BMPER/FLT1/BTG1/ABL1/PGF/ADAM12/F3
BP	GO:1904018	positive regulation of vasculature development	148	0.61536	1.90424	1.9222e-08	4.00557e-07	2.39314e-07	2847	tags=43%, list=14%, signal=37%	HSPB6/SFRP2/GREM1/PTGIS/SMOC2/CYP1B1/THBS1/C3/AKT3/RAMP2/AQP1/CCL11/APLNR/PRKCB/CXCR4/TNFSF12/RHOB/TEK/CD34/ITGA5/FGF2/VEGFC/ISL1/CDH5/TIE1/TGFBR2/ENG/SERPINE1/RRAS/PRKD1/GHRL/ETS1/CX3CR1/ECM1/HGF/C3AR1/TWIST1/C5AR1/CMA1/SASH1/PIK3CD/TBXA2R/KDR/VEGFB/FOXC2/CYBB/GAB1/SEMA5A/ITGB2/HSPB1/FGF18/CD40/NOS3/ITGAX/GATA2/ITGB1/BMPER/FLT1/BTG1/ABL1/PGF/ADAM12/F3
BP	GO:0006417	regulation of translation	339	-0.382541	-1.67495	1.92611e-08	4.00557e-07	2.39314e-07	4585	tags=46%, list=23%, signal=36%	EIF1/EIF3C/POLDIP3/FXR1/AKT1/ZCCHC4/RBM8A/UCN/RPL30/DNAJC3/MTRF1/GSPT1/DDX39B/PASK/KLHL25/CNOT1/EIF2B4/COA3/METTL3/DPH5/UPF1/PPP1R15B/TOB1/ELAVL1/CNOT6/NANOS3/EEFSEC/GEMIN5/RPL38/IGF2BP3/RMND1/EIF5/MAPKAPK5/IREB2/FMR1/CNOT7/POLR2G/RPS4X/EIF2A/LSM14B/MRPS27/UQCC1/LARP4B/EIF2B2/BCL3/EIF3H/YTHDF2/MPV17L2/MALSU1/MTG2/EIF2B5/CNOT3/PLEKHN1/RPUSD4/EIF4H/EIF4E2/KRT17/ZNF706/FASTKD2/PLXNB2/NCBP1/ITGA2/HNR…
CC	GO:0070469	respirasome	84	-0.608192	-2.20906	1.93004e-08	4.00557e-07	2.39314e-07	3857	tags=62%, list=20%, signal=50%	NDUFB10/NDUFA7/OXA1L/UQCRC2/NDUFB11/NDUFS5/NDUFS1/UQCRQ/TTC19/NDUFS8/COX7B/NDUFS7/SDHD/NDUFB2/NDUFB6/COX7A2L/NDUFC1/NDUFA12/NDUFB4/COX4I1/NDUFA10/COX15/COX6B1/NDUFA1/NDUFA9/SDHB/NDUFA8/NDUFAB1/NDUFA6/BCS1L/UQCR10/NDUFS3/NDUFB9/NDUFS2/NDUFB3/COX8A/UQCRHL/UQCC3/COX7A2/NDUFV1/FOXRED1/NDUFS6/UQCRFS1/COX6A1/UQCRH/SDHA/COX5A/COA6/UQCRC1/C15orf48/CYCS/CYC1
BP	GO:0098742	cell-cell adhesion via plasma-membrane adhesion molecules	264	0.548463	1.75463	1.94147e-08	4.01899e-07	2.40116e-07	4337	tags=45%, list=22%, signal=36%	SPARCL1/NEXN/SELP/CLDN5/PALLD/SCARF2/CDH11/PECAM1/VSTM2L/PCDHGC3/PTPRM/SELL/PCDH7/HMCN1/GPC6/DCHS1/CADM3/MYADM/PTPRS/VCAM1/ITGA5/ROBO1/CDH5/FAT4/TGFBR2/PCDH18/L1CAM/MILR1/CLDN11/PCDHGB7/PKD1/OBSL1/CNTN4/PCDH17/PCDHB4/ESAM/CX3CL1/CLSTN3/SELE/AMIGO2/EMB/ITGAM/ITGAL/CD84/PCDHGA12/PCDHB5/ROBO4/TGFB2/TENM3/ITGB2/CLDN18/ADIPOQ/AMIGO1/PLXNB3/CDH19/TENM4/LRRC4B/PCDH12/MMP24/APOA1/RET/CD6/CD209/CDH6/CDH2/…
CC	GO:0001725	stress fiber	59	0.748689	2.0884	1.95469e-08	4.02577e-07	2.40521e-07	1361	tags=41%, list=7%, signal=38%	SYNPO2/MYL9/MYLK/SORBS1/PGM5/PDLIM3/FERMT2/PALLD/SYNPO/FAM107A/LPP/LDB3/PDLIM4/PDLIM7/TPM1/TEK/MYH10/ABLIM3/ROR1/FHL3/ACTN1/LCP1/SHROOM4/ILK
CC	GO:0097517	contractile actin filament bundle	59	0.748689	2.0884	1.95469e-08	4.02577e-07	2.40521e-07	1361	tags=41%, list=7%, signal=38%	SYNPO2/MYL9/MYLK/SORBS1/PGM5/PDLIM3/FERMT2/PALLD/SYNPO/FAM107A/LPP/LDB3/PDLIM4/PDLIM7/TPM1/TEK/MYH10/ABLIM3/ROR1/FHL3/ACTN1/LCP1/SHROOM4/ILK
MF	GO:0030515	snoRNA binding	30	-0.80066	-2.34522	1.98939e-08	4.08683e-07	2.44169e-07	2911	tags=80%, list=15%, signal=68%	IMP3/UTP6/BMS1/XRCC5/NUDT5/DHX37/TSR1/NUFIP1/HEATR1/NHP2/WDR3/TBL3/NUDT1/NOP14/PRKDC/IMP4/NOP58/DDX21/NOP56/GAR1/NOLC1/BYSL/RRP9/DKC1
BP	GO:0031032	actomyosin structure organization	183	0.589178	1.84892	2.13022e-08	4.36506e-07	2.60792e-07	3546	tags=43%, list=18%, signal=36%	MYH11/CNN1/LMOD1/ELN/SFRP1/SORBS1/PGM5/FERMT2/S1PR1/CSRP1/MYOC/CFL2/TMOD1/LDB3/PDGFRB/PDGFRA/TGFB3/PHLDB2/TPM1/LPAR1/DLC1/ACTC1/CGNL1/FRMD6/MYH10/EVL/ARHGEF15/EDN1/CSRP2/CNN3/NRP1/OBSL1/ASAP3/RGCC/MEF2A/PFN2/ARHGAP6/WAS/EPB41L3/PTGER4/CORO2B/ACTN2/ARHGEF10/TAC1/TGFBR1/LIMCH1/EPB41L2/PIK3R1/ZYX/TMOD2/CCDC88A/APOA1/FHOD3/CASQ1/SORBS3/GPR65/AKAP13/LURAP1/NOX4/EPB41L4A/PPM1F/PHACTR1/ITGB5/ABL1/CDC42B…
BP	GO:0099177	regulation of trans-synaptic signaling	396	0.508344	1.6586	2.15447e-08	4.4036e-07	2.63095e-07	4124	tags=37%, list=21%, signal=30%	TACR2/AKAP12/MAP1B/PTN/LAMA2/ATP1A2/SNCG/ROR2/MAP1A/PRKAR2B/FAM107A/CDH11/SYT11/KIT/DMPK/SERPINE2/PRKCB/MEF2C/TSHZ3/CCL2/NCS1/NPTXR/PTPRS/GRIK5/RGS4/CHRNA3/NLGN2/NFATC4/EGR2/GNAI1/BCHE/ADRA2A/SRGN/EDN1/LZTS1/GHRL/CACNB2/CNR1/DLG4/SORCS2/SYNGR1/TYROBP/CX3CR1/ZDHHC2/CNTN4/BACE1/LRRK2/PCDH17/GPER1/PLCB4/FYN/SNAP25/VAMP2/CX3CL1/CLSTN3/NPTX1/PLCL2/P2RX1/APOE/PLCL1/CACNG4/EPHA4/ADRB2/TAC1/ADCYAP1/RASGR…
BP	GO:0010833	telomere maintenance via telomere lengthening	76	-0.618447	-2.20447	2.17421e-08	4.43276e-07	2.64837e-07	3737	tags=53%, list=19%, signal=43%	RPA1/PNKP/RFC1/NAF1/MAPKAPK5/NOP10/EXOSC10/ACD/SRC/PINX1/TELO2/XRCC5/SMG5/WRAP53/HNRNPU/HNRNPC/NHP2/HNRNPA1/PIF1/PARP1/DCLRE1B/MAPK15/PTGES3/HNRNPA2B1/HSP90AA1/CCT4/NAT10/CCT2/GAR1/TCP1/CCT7/CCT3/CCT8/CCT5/HSP90AB1/CCT6A/RAD51/DKC1/AURKB/NEK2
BP	GO:0034728	nucleosome organization	107	-0.563601	-2.11405	2.18325e-08	4.44e-07	2.65269e-07	3740	tags=50%, list=19%, signal=40%	SPTY2D1/CTCF/GRWD1/ACTR6/SART3/ZNHIT1/BRD2/RBBP4/RBBP7/NAP1L4/SMARCD1/MIS18BP1/IPO4/HIRA/PIWIL1/NFE2/LIN54/DAXX/ITGB3BP/SUPT16H/SMARCB1/SMARCA4/HAT1/SMARCC1/ANP32B/CENPL/CENPK/CENPQ/SMARCD2/NASP/CENPI/RUVBL1/POLE3/SOX9/NPM1/SET/ANP32E/CENPO/CHAF1A/HMGB2/CENPN/CHAF1B/CENPH/CENPW/CENPU/MIS18A/OIP5/HMGA1/CENPM/HJURP/CENPA/MCM2/ASF1B
BP	GO:0006336	DNA replication-independent nucleosome assembly	34	-0.774284	-2.3122	2.24655e-08	4.55729e-07	2.72277e-07	3110	tags=74%, list=16%, signal=62%	RBBP4/RBBP7/MIS18BP1/IPO4/HIRA/ITGB3BP/HAT1/CENPL/CENPK/CENPQ/NASP/CENPI/RUVBL1/NPM1/CENPO/CENPN/CENPH/CENPW/CENPU/MIS18A/OIP5/CENPM/HJURP/CENPA/ASF1B
BP	GO:0030490	maturation of SSU-rRNA	46	-0.70878	-2.25642	2.30325e-08	4.66063e-07	2.78451e-07	5285	tags=85%, list=27%, signal=62%	RPS14/TSR2/UTP23/KRI1/RPS8/MRPS11/RPS28/UTP3/RPS16/NOP9/UTP20/ERCC2/RCL1/DDX52/UTP6/BMS1/RRP36/NGDN/LSM6/DHX37/TSR1/RPS21/WDR46/RIOK1/HEATR1/ABT1/RPS19/WDR3/TBL3/NOB1/NOL10/RPP40/NOL11/NOP14/FAM207A/DCAF13/NAT10/RRS1/BYSL
CC	GO:0009295	nucleoid	42	-0.74383	-2.31902	2.31524e-08	4.66158e-07	2.78508e-07	2568	tags=64%, list=13%, signal=56%	FASTKD2/VDAC2/UQCC2/TFB1M/TFAM/DHX30/DDX28/POLDIP2/SUPV3L1/POLRMT/FASTKD5/VDAC1/LONP1/TUFM/TFB2M/HSD17B10/SSBP1/GRSF1/TRMT10C/LRRC59/SLC25A5/HSPA9/TOP1MT/DNA2/ATAD3A/LRPPRC/SHMT2
CC	GO:0042645	mitochondrial nucleoid	42	-0.74383	-2.31902	2.31524e-08	4.66158e-07	2.78508e-07	2568	tags=64%, list=13%, signal=56%	FASTKD2/VDAC2/UQCC2/TFB1M/TFAM/DHX30/DDX28/POLDIP2/SUPV3L1/POLRMT/FASTKD5/VDAC1/LONP1/TUFM/TFB2M/HSD17B10/SSBP1/GRSF1/TRMT10C/LRRC59/SLC25A5/HSPA9/TOP1MT/DNA2/ATAD3A/LRPPRC/SHMT2
BP	GO:0010975	regulation of neuron projection development	408	0.50336	1.642	2.34428e-08	4.70834e-07	2.81302e-07	3973	tags=39%, list=20%, signal=32%	SFRP2/DPYSL3/SFRP1/RGMA/FLNA/SERPINF1/MAP1B/NR2F1/NGFR/SPOCK1/PTN/CXCL12/NTN1/SLIT2/ROR2/EPHA3/RGS2/VIM/FN1/PRRX1/SDC2/LPAR1/TOX/NEGR1/NCS1/CNTN1/THY1/ATP1B2/PTPRS/ROBO1/EPHA7/SEMA3G/LRP1/DENND5A/LGALS1/CHRNA3/STMN2/NFATC4/MAP6/SEMA3C/NDNF/CAMK1D/LZTS1/PRKD1/PLXNA4/L1CAM/FEZ1/CNR1/SEMA6A/ROR1/NRP1/CRABP2/OBSL1/FZD1/PLXNC1/HGF/CHN1/CRMP1/LRRK2/MACF1/UST/SEMA6B/FYN/SNAP25/CX3CL1/SCN1B/APOE/VLDLR/AR…
BP	GO:0000082	G1/S transition of mitotic cell cycle	244	-0.436377	-1.82388	2.37271e-08	4.75365e-07	2.84009e-07	2109	tags=33%, list=11%, signal=30%	CARM1/MTBP/ZPR1/CNOT10/EIF4E/CASP2/POLA1/E2F3/CDK4/APEX1/CDC34/CUL4A/TRIAP1/PRMT1/CDK2/E2F4/PSME3/MYC/EIF4G1/CCNE2/ORC5/MCM8/CDK5/PRIM2/CCND1/BID/MUC1/PRKDC/POLE/RPA3/RBL1/NASP/CNOT11/DHFR/POLE3/PRIM1/RFWD3/FBXO5/POLA2/CDK16/MCM5/POLE2/CDC7/CHEK2/PSME2/MCM6/TFDP1/E2F7/KIF14/PPAT/GMNN/DBF4/EIF4EBP1/CDC25C/ORC6/E2F8/MCM10/SKP2/MCM3/EZH2/RCC1/PCNA/IQGAP3/GTSE1/MCM7/ORC1/CDKN3/SFN/MCM4/CDC25A/CDC45/E…
BP	GO:0050808	synapse organization	398	0.504572	1.64655	2.38995e-08	4.77636e-07	2.85365e-07	4333	tags=43%, list=22%, signal=34%	SPARCL1/FLNA/MAP1B/TUBA1A/PTN/NTN1/TNC/PDZRN3/C3/SYNPO/SNCG/PALM/DMPK/MEF2C/LGI2/NRP2/PCDHGC3/NFASC/GPC6/SPARC/SPOCK2/PTPRS/F2R/SRPX2/EPHA7/UTRN/NFIA/MYH10/NLGN2/NFATC4/SYNDIG1/PRNP/ARHGEF15/COL4A5/SRGN/IL10RA/GHRL/L1CAM/CACNB2/NRXN2/DLG4/TREM2/CX3CR1/ZDHHC2/WASF3/OBSL1/FZD1/FLRT2/LRRK2/PCDH17/PCDHB4/ACTN1/FYN/C5AR1/CX3CL1/CLSTN3/AMIGO2/ITGAM/GLRB/DOCK10/APOE/GAP43/LAMB2/EPHA4/COL4A1/PCDHB5/C1QA/…
BP	GO:0051052	regulation of DNA metabolic process	315	-0.397834	-1.70226	2.52716e-08	5.03813e-07	3.01005e-07	2640	tags=31%, list=13%, signal=28%	PINX1/DTX3L/NBN/MSH6/AXIN2/XRCC5/CEBPG/HMGA2/SMG5/MAGEF1/WRAP53/NABP2/HNRNPU/SPIRE2/TNFSF13/EXOSC3/PPP4R2/HNRNPC/FANCB/OTUB1/PPP4C/HSF1/HNRNPD/PPARG/HMCES/HNRNPA1/TMEM161A/DHX9/PAXIP1/CUL4A/KDM1A/RPS3/PIF1/PARP1/CBX8/WRNIP1/DNAJC2/MYC/KDM1B/HMGB1/MAPK15/DDX11/PTGES3/HNRNPA2B1/DEK/HSP90AA1/BRCC3/PRKDC/UBQLN4/USP1/TRIM28/BLM/FGFR4/CCT4/PRMT5/NAT10/CCT2/RFC5/NPM1/WDR18/TCP1/FIGNL1/MSH2/MEN1/ENDOG/CC…
BP	GO:0033047	regulation of mitotic sister chromatid segregation	44	-0.719102	-2.2851	2.74338e-08	5.45575e-07	3.25955e-07	1497	tags=50%, list=8%, signal=46%	ZW10/GEN1/SPDL1/KNTC1/MAD2L1BP/RAD21/FBXO5/BUB3/NDC80/TTK/BUB1B/TRIP13/CENPF/ZWINT/AURKB/PTTG1/BUB1/PLK1/MAD2L1/CCNB1/CDT1/CDC20
BP	GO:0031497	chromatin assembly	118	-0.544656	-2.09169	2.7676e-08	5.48962e-07	3.27979e-07	3740	tags=47%, list=19%, signal=39%	SPTY2D1/CTCF/GRWD1/SIRT6/CDAN1/SART3/BRD2/RBBP4/RBBP7/NAP1L4/MIS18BP1/IPO4/CDKN2A/PARP10/HIRA/HMGA2/LIN54/DAXX/ITGB3BP/HAT1/HMGB1/ANP32B/CENPL/BEND3/HDAC1/CENPV/CENPK/CENPQ/NASP/DNMT1/TRIM28/CENPI/RUVBL1/POLE3/SOX9/NPM1/HELLS/SET/NOC2L/CENPO/SUV39H1/CHAF1A/HMGB2/CENPN/CHAF1B/CENPH/CENPW/CENPU/MIS18A/OIP5/HMGA1/CENPM/HJURP/CENPA/MCM2/ASF1B
BP	GO:0034724	DNA replication-independent nucleosome organization	35	-0.775797	-2.35275	2.77397e-08	5.48962e-07	3.27979e-07	3110	tags=74%, list=16%, signal=63%	RBBP4/RBBP7/MIS18BP1/IPO4/HIRA/ITGB3BP/SUPT16H/HAT1/CENPL/CENPK/CENPQ/NASP/CENPI/RUVBL1/NPM1/CENPO/CENPN/CENPH/CENPW/CENPU/MIS18A/OIP5/CENPM/HJURP/CENPA/ASF1B
BP	GO:0050730	regulation of peptidyl-tyrosine phosphorylation	250	0.540695	1.72744	2.81358e-08	5.55441e-07	3.3185e-07	3819	tags=39%, list=19%, signal=32%	SFRP2/THBS4/GREM1/SFRP1/FGF7/CAV1/PECAM1/KIT/IGF2/ENPP2/CSPG4/AGT/CNTN1/THY1/CD36/CTF1/ITGA5/FGF10/ISL1/EPHA7/PDGFD/IL6ST/IL34/TGFB1/GHR/CRLF1/SPINK1/CSF1R/PRNP/ADRA2A/GAS6/PTPRC/GHRL/HCLS1/VTN/BANK1/NRP1/BMP6/DLG4/SH3BP5/TREM2/PDGFC/IGF1/HGF/FYN/ITGB3/CD4/NEDD9/BST1/CD3E/STAP1/EPHA4/ANGPT1/GPRC5B/HTR2A/ITGB2/IL6R/ADIPOQ/SAMSN1/EFNA5/IL24/CD40/CD74/SH2B3/EGFR/ACVR1/NOX4/CCL5/NTRK2/NCF1/ERRFI1/SOC…
BP	GO:0007159	leukocyte cell-cell adhesion	345	0.517623	1.67775	2.8239e-08	5.56123e-07	3.32257e-07	3202	tags=38%, list=16%, signal=33%	CCL19/CCL21/SELP/JAM2/FGL2/CXCL12/LRRC32/CAV1/PECAM1/IGF2/GPNMB/CCL2/SELL/ITPKB/DTX1/CCR7/THY1/MSN/VCAM1/NR4A3/ITGA5/GLI3/ZBTB16/IL6ST/LGALS1/TGFBR2/EGR3/PRNP/PTPRC/CD27/GLI2/ETS1/CERCAM/SASH3/IL7R/HLA-DPB1/LEF1/LAPTM5/CX3CR1/IGF1/AIF1/NCKAP1L/ST3GAL4/MADCAM1/FYN/TWSG1/SELE/CD5/ITGAL/HLA-DPA1/ALOX5/CD4/SPN/VSIG4/RASAL3/DOCK8/SELPLG/BCL6/CARD11/CD3E/TNFRSF13C/CD1D/ITGA4/JAK3/STAT5B/PLA2G2D/CORO1A/…
BP	GO:1904062	regulation of cation transmembrane transport	319	0.525712	1.69914	2.92846e-08	5.74606e-07	3.433e-07	3729	tags=35%, list=19%, signal=29%	PLN/FHL1/FLNA/KCNMB1/JPH2/CASQ2/GEM/FXYD6/CAV1/RRAD/ATP1A2/KCNE4/ATP2B4/RGS2/RAMP3/APLNR/MEF2C/CCL2/CACNA2D1/PKD2/DMD/THY1/ANK2/STOM/ATP1B2/CLIC2/F2R/HSPA2/F2RL3/CACNA1C/KCNH2/UTRN/AHNAK/RGS4/NLGN2/SCN4B/REM1/PRNP/ADRA2A/EHD3/CACNB2/PDE4B/DLG4/TRPC1/TREM2/FXYD1/GPER1/FYN/TWIST1/VAMP2/PLP1/CX3CL1/SCN1B/AKAP6/PIK3CG/RGS9/CD19/SLC8A1/CACNG4/KCNE2/CORO1A/ADRB2/ACTN2/RASGRF2/PLCG2/AMIGO1/NLGN3/GSTM2/D…
BP	GO:0070252	actin-mediated cell contraction	115	0.642871	1.93923	2.93195e-08	5.74606e-07	3.433e-07	2152	tags=32%, list=11%, signal=29%	DES/PLN/FLNA/TPM2/CAV1/ATP1A2/TMOD1/KCNE4/KCNJ8/VIM/GSN/TPM1/CACNA2D1/DMD/ACTC1/ANK2/EPDR1/GJA1/CACNA1C/KCNH2/PARVA/SCN4B/KCND3/GJC1/PDPN/CACNB2/PDE4B/GJA5/SCN1B/KCNA5/STC1/KCNE2/ACTN2/LIMCH1/MYL6/SNTA1/PDE4D
BP	GO:0070371	ERK1 and ERK2 cascade	293	0.533823	1.71886	2.9436e-08	5.75495e-07	3.43831e-07	3588	tags=38%, list=18%, signal=32%	CCL19/FBLN1/CCL21/HAND2/AKAP12/EMILIN1/FERMT2/DUSP1/TIMP3/CCL11/RAMP3/FN1/PDGFRB/GPR183/PDGFRA/GPNMB/CCL2/GPBAR1/CCR7/TEK/CD36/F2R/PSCA/TNFAIP8L3/FGF10/FGF2/EPHA7/PDGFD/TGFB1/LRP1/GLIPR2/CSF1R/GAS6/PTPRC/RRAS/ACKR3/SEMA6A/NRP1/TREM2/PDGFC/IGF1/LMO3/SCIMP/MTURN/GPER1/C5AR1/CX3CL1/TLR4/PLA2G5/APOE/CD4/CCL22/HTR2B/SPRY1/KDR/PTGER4/ANGPT1/MAP3K12/DUSP26/ADCYAP1/CCL14/NOTCH2/HTR2A/ZFP36L1/ADIPOQ/FLT4/…
CC	GO:0030532	small nuclear ribonucleoprotein complex	66	-0.651889	-2.21777	3.06561e-08	5.96162e-07	3.56179e-07	4684	tags=74%, list=24%, signal=57%	PRPF3/PRPF39/RBMX2/SNRPB2/DDX39B/SNRNP70/ARFGEF1/SF3A3/PRPF31/MEPCE/SART1/LSM8/SART3/HTATSF1/SF3B2/DDX23/TXNL4A/PRPF6/SNRNP40/TXNL4B/LSM6/SF3A2/SF3B5/SNRNP200/USP39/LSM3/SNRPD3/SNRPD2/PRPF40A/SF3B6/TGS1/LSM7/EFTUD2/PHF5A/PPIH/LSM5/SNRPA/GEMIN4/LSM2/SF3B3/SNRPE/SNRPF/PRPF4/SNRPA1/SNRPG/SNRPC/LSM4/SNRPB/SNRPD1
BP	GO:0010257	NADH dehydrogenase complex assembly	55	-0.679965	-2.24869	3.07141e-08	5.96162e-07	3.56179e-07	5631	tags=85%, list=29%, signal=61%	NDUFB7/NDUFC2/NDUFA13/NDUFB1/COA1/NDUFA5/NDUFAF5/NDUFAF3/NDUFAF2/NDUFB5/NDUFV2/NDUFA2/ACAD9/TIMMDC1/ECSIT/NDUFAF6/NDUFB10/NDUFA7/OXA1L/NDUFB11/NDUFS5/NDUFS1/NDUFS8/TMEM126A/NDUFS7/NDUFB2/NDUFAF4/NDUFB6/TMEM126B/NDUFC1/NDUFA12/NDUFB4/NDUFA10/TIMM21/NDUFA1/NDUFA9/NDUFA8/NDUFAB1/NDUFA6/BCS1L/NDUFS3/NDUFB9/NDUFS2/NDUFB3/NDUFV1/FOXRED1/NDUFS6
BP	GO:0032981	mitochondrial respiratory chain complex I assembly	55	-0.679965	-2.24869	3.07141e-08	5.96162e-07	3.56179e-07	5631	tags=85%, list=29%, signal=61%	NDUFB7/NDUFC2/NDUFA13/NDUFB1/COA1/NDUFA5/NDUFAF5/NDUFAF3/NDUFAF2/NDUFB5/NDUFV2/NDUFA2/ACAD9/TIMMDC1/ECSIT/NDUFAF6/NDUFB10/NDUFA7/OXA1L/NDUFB11/NDUFS5/NDUFS1/NDUFS8/TMEM126A/NDUFS7/NDUFB2/NDUFAF4/NDUFB6/TMEM126B/NDUFC1/NDUFA12/NDUFB4/NDUFA10/TIMM21/NDUFA1/NDUFA9/NDUFA8/NDUFAB1/NDUFA6/BCS1L/NDUFS3/NDUFB9/NDUFS2/NDUFB3/NDUFV1/FOXRED1/NDUFS6
BP	GO:0035637	multicellular organismal signaling	198	0.579925	1.8272	3.17644e-08	6.15075e-07	3.67479e-07	2504	tags=29%, list=13%, signal=26%	PLN/FLNA/CASQ2/CACNA1H/JAM3/FXYD6/S1PR1/CAV1/ABCC9/ATP1A2/KCNE4/ATP2B4/CNTNAP1/DMPK/NFASC/CACNA2D1/AGT/NPR1/ANK2/ATP1B2/GJA1/CACNA1C/ITPR1/ISL1/KCNH2/CARTPT/KCNK3/SCN4B/KCND3/EHD3/GHRL/GJC1/NPR2/SCN7A/CACNB2/TRPC1/FXYD1/MEF2A/GJA5/GPER1/ATP2A3/SCN1B/AVPR1A/KCNA5/P2RX1/SLC8A1/CACNG4/KCNE2/KCND1/PDE4D/NPPC/CASQ1/SLC8A2/SLC4A3/CTNNA3/ITPR2/RYR2/NTRK2
BP	GO:0051249	regulation of lymphocyte activation	417	0.505211	1.64965	3.2112e-08	6.20322e-07	3.70613e-07	3335	tags=39%, list=17%, signal=33%	CCL19/CCL21/SFRP1/FGL2/LRRC32/CAV1/AXL/IGF2/MEF2C/GPR183/GPNMB/CCL2/TOX/ITPKB/DTX1/CCR7/THY1/IGLL5/VCAM1/FGF10/GLI3/ZBTB16/IL6ST/TGFB1/LGALS1/TGFBR2/CD22/EGR3/PRNP/GAS6/PTPRC/CD27/GLI2/SASH3/IL7R/HLA-DPB1/BANK1/LEF1/TYROBP/LAPTM5/INHBA/BLK/IGF1/AIF1/NCKAP1L/FYN/TWSG1/MZB1/CD5/TLR4/HLA-DPA1/BCL2/HLA-DOA/CD19/BTK/CD4/SPN/VSIG4/RASAL3/DOCK8/BST1/MNDA/TNFSF8/BCL6/CD2/CARD11/CD3E/IRS2/TNFRSF13C/CD1D/M…
BP	GO:0070374	positive regulation of ERK1 and ERK2 cascade	193	0.583074	1.8353	3.29597e-08	6.35181e-07	3.79491e-07	3588	tags=44%, list=18%, signal=36%	CCL19/CCL21/HAND2/AKAP12/FERMT2/CCL11/RAMP3/PDGFRB/GPR183/PDGFRA/GPNMB/CCL2/GPBAR1/CCR7/TEK/CD36/F2R/TNFAIP8L3/FGF10/FGF2/PDGFD/TGFB1/LRP1/GLIPR2/CSF1R/GAS6/PTPRC/ACKR3/NRP1/TREM2/PDGFC/SCIMP/MTURN/GPER1/C5AR1/CX3CL1/TLR4/PLA2G5/APOE/CD4/CCL22/HTR2B/KDR/ANGPT1/MAP3K12/ADCYAP1/CCL14/NOTCH2/HTR2A/FLT4/FGF18/GNAI2/RAP1A/CD74/CCL23/EGFR/BMPER/CCL5/HLA-DRB1/SEMA7A/CCL13/CD44/SLAMF1/CCL26/ABL1/GCG/NOD1…
BP	GO:0034080	CENP-A containing nucleosome assembly	26	-0.818996	-2.32616	3.47917e-08	6.67309e-07	3.98686e-07	1208	tags=81%, list=6%, signal=76%	RBBP4/RBBP7/MIS18BP1/ITGB3BP/CENPL/CENPK/CENPQ/NASP/CENPI/RUVBL1/NPM1/CENPO/CENPN/CENPH/CENPW/CENPU/MIS18A/OIP5/CENPM/HJURP/CENPA
BP	GO:0061641	CENP-A containing chromatin organization	26	-0.818996	-2.32616	3.47917e-08	6.67309e-07	3.98686e-07	1208	tags=81%, list=6%, signal=76%	RBBP4/RBBP7/MIS18BP1/ITGB3BP/CENPL/CENPK/CENPQ/NASP/CENPI/RUVBL1/NPM1/CENPO/CENPN/CENPH/CENPW/CENPU/MIS18A/OIP5/CENPM/HJURP/CENPA
BP	GO:0010632	regulation of epithelial cell migration	220	0.564057	1.7935	3.52071e-08	6.73678e-07	4.02492e-07	2600	tags=38%, list=13%, signal=34%	SMOC2/DCN/SERPINF1/FGF7/THBS1/PTN/SLIT2/FGFR1/AKT3/MEOX2/ATP2B4/MMRN2/RHOJ/MEF2C/NRP2/ENPP2/PTPRM/AGT/RHOB/TEK/SPARC/SRPX2/MCC/FGF10/FGF2/VEGFC/CXCL13/TGFB1/TGFBR2/EVL/GLIPR2/NR2F2/EDN1/RRAS/PRKD1/ETS1/MAP3K3/ACVRL1/NRP1/RGCC/MAPRE2/MACF1/PFN2/ITGB3/ATOH8/PIK3CG/SASH1/APOE/PIK3CD/ARSB/TBXA2R/KDR/VASH1/FOXC2/STC1/PTGS2/ANGPT1/STARD13/TAC1/IQSEC1/BMPR2/GATA3/TGFB2/HDAC5/PLCG2/SEMA5A/HSPB1/FLT4/FGF1…
BP	GO:0060538	skeletal muscle organ development	149	0.606952	1.87555	3.69321e-08	7.0502e-07	4.21217e-07	3743	tags=38%, list=19%, signal=31%	ELN/DCN/MYOCD/ASB2/SVIL/CAV1/HEYL/POPDC2/CFL2/MEOX2/IGF2/MEF2C/BASP1/BVES/SMYD1/TCF21/MSC/TGFB1/EGR1/EGR2/NR2F2/SMO/VAMP5/MYOM1/NUPR1/CDON/BTG2/CAV2/HLF/SCX/TWIST1/BCL2/PAX5/RBM24/FOS/MYL6/MEF2D/CASQ1/ATF3/HDAC9/CNTFR/SKI/SOX8/DISP1/HLX/CFLAR/KCNAB1/DLL1/HDAC4/HIVEP3/YBX3/KLHL41/EPHB1/ACTA1/COL19A1/P2RX2/NR1D2
BP	GO:0010972	negative regulation of G2/M transition of mitotic cell cycle	93	-0.572414	-2.07309	3.83747e-08	7.3027e-07	4.36302e-07	3347	tags=60%, list=17%, signal=50%	PSMD10/PSMD7/PSMF1/PSMC1/PSMB6/PSMD1/PSMA6/PSMD8/PSMD5/PSMC3/PSMB10/PINX1/NBN/PSME1/CDK5RAP3/HMGA2/NABP2/PSMD12/PSMC6/PSMB9/PSMC2/PSMB2/PSMB4/PSMD13/PSMB1/RINT1/PSMA7/NAE1/PSMD11/PSMC4/PSME3/PSMB7/PSMB3/PSMA4/PSMA5/PSMA3/PSMB5/PSMD2/PSMB8/DONSON/BLM/TOPBP1/PSMD14/RAD21/BRCA1/PSMD3/PSME2/CLSPN/CHMP4C/CHEK1/TICRR/ORC1/CDC6/AURKB/CDK1/AURKA
BP	GO:0003018	vascular process in circulatory system	240	0.555005	1.77722	3.84353e-08	7.3027e-07	4.36302e-07	3275	tags=38%, list=17%, signal=32%	ACTA2/TACR2/AKAP12/KCNMA1/FERMT2/CLDN5/CAV1/ABCC9/ATP1A2/SLIT2/RAMP2/PDE3A/SLC24A3/COMP/ATP2B4/EDNRA/KCNJ8/RGS2/AGT/SLC2A4/ITGA1/NPR1/PRKG1/TEK/ATP1B2/CD36/F2R/SLC16A2/GJA1/PDE2A/CDH5/TGFB1/KLF2/LRP1/SLC7A2/LEPR/EDNRB/ADRA2A/EDN1/ABCB1/AGTR1/BMP6/SLC16A7/GJA5/GPER1/ATP2A3/AVPR1A/KCNA5/SLC22A3/P2RX1/APOE/HTR2B/TBXA2R/SLC8A1/FOXC2/ANGPT1/ADRB2/SLCO2B1/BMPR2/HTR2A/PTAFR/SLC2A3/HRH2/AVPR2/SNTA1/NOS3/…
BP	GO:0003206	cardiac chamber morphogenesis	110	0.650972	1.9452	3.96403e-08	7.51402e-07	4.48928e-07	2541	tags=38%, list=13%, signal=33%	SFRP2/CPE/HAND2/FOXF1/SLIT3/ADAMTS1/HEYL/SLIT2/HEG1/MEF2C/NRP2/TPM1/TEK/ROBO1/ISL1/TGFB1/TGFBR2/ENG/TGFBR3/PARVA/SEMA3C/SMO/ZFPM2/SMARCD3/CITED2/NRP1/RBP4/RARB/FOXC2/TGFBR1/TBX2/BMPR2/GATA3/TGFB2/NOTCH2/HEY2/SMAD7/DHRS3/ACVR1/FHL2/RYR2/NOG
BP	GO:0030500	regulation of bone mineralization	70	0.70723	2.02558	4.13341e-08	7.81679e-07	4.67017e-07	1887	tags=39%, list=10%, signal=35%	MGP/GREM1/DDR2/OMD/TMEM119/PTN/S1PR1/COMP/LTF/MEF2C/LTBP3/TGFB3/TGFB1/SRGN/BMP6/ECM1/GPM6B/TWIST1/ALOX5/SLC8A1/ADRB2/PKDCC/BMPR2/ANKH/P2RX7/KL/BMPR1B
BP	GO:0032201	telomere maintenance via semi-conservative replication	27	-0.817585	-2.31194	4.17885e-08	7.88429e-07	4.7105e-07	1168	tags=63%, list=6%, signal=59%	PRIM2/POLE/RPA3/POLD3/POLE3/PRIM1/RFC5/POLA2/POLD1/DNA2/RFC2/POLE2/RFC4/POLD2/RFC3/PCNA/FEN1
BP	GO:0033046	negative regulation of sister chromatid segregation	41	-0.737535	-2.27175	4.35593e-08	8.16131e-07	4.876e-07	1497	tags=54%, list=8%, signal=50%	ZW10/GEN1/SPDL1/KNTC1/MAD2L1BP/RAD21/FBXO5/BUB3/NDC80/TTK/BUB1B/TRIP13/CENPF/ZWINT/AURKB/PTTG1/BUB1/PLK1/MAD2L1/CCNB1/CDT1/CDC20
BP	GO:0033048	negative regulation of mitotic sister chromatid segregation	41	-0.737535	-2.27175	4.35593e-08	8.16131e-07	4.876e-07	1497	tags=54%, list=8%, signal=50%	ZW10/GEN1/SPDL1/KNTC1/MAD2L1BP/RAD21/FBXO5/BUB3/NDC80/TTK/BUB1B/TRIP13/CENPF/ZWINT/AURKB/PTTG1/BUB1/PLK1/MAD2L1/CCNB1/CDT1/CDC20
BP	GO:2000816	negative regulation of mitotic sister chromatid separation	41	-0.737535	-2.27175	4.35593e-08	8.16131e-07	4.876e-07	1497	tags=54%, list=8%, signal=50%	ZW10/GEN1/SPDL1/KNTC1/MAD2L1BP/RAD21/FBXO5/BUB3/NDC80/TTK/BUB1B/TRIP13/CENPF/ZWINT/AURKB/PTTG1/BUB1/PLK1/MAD2L1/CCNB1/CDT1/CDC20
BP	GO:0048738	cardiac muscle tissue development	187	0.584214	1.83491	4.50341e-08	8.41815e-07	5.02946e-07	2567	tags=32%, list=13%, signal=28%	MYH11/PLN/GREM1/PI16/JPH2/MYOCD/S1PR1/SGCD/RGS2/HEG1/PDGFRB/MEF2C/PDGFRA/TPM1/BVES/ACTC1/GLI1/GJA1/FGF2/ISL1/MEIS1/TGFB1/RGS4/TGFBR2/FZD7/ENG/TGFBR3/SORBS2/ZFPM2/EDN1/GJC1/IGF1/OBSL1/MEF2A/RBP4/RARB/AKAP6/ALPK3/SLC8A1/FOXC2/KCNK2/ACTN2/TGFBR1/TBX2/TGFB2/SGCB/PIM1/ADAMTS9/TENM4/FHOD3/HEY2/SMAD7/ACVR1/FHL2/AKAP13/RYR2/NOG/DKK1/MAPK11
BP	GO:0043628	ncRNA 3'-end processing	46	-0.699278	-2.22617	4.57447e-08	8.53128e-07	5.09705e-07	4381	tags=61%, list=22%, signal=47%	INTS12/TUT1/ERI3/TOE1/INTS5/EXOSC10/ELAC2/ERI2/PTCD1/ERI1/INTS1/INTS2/RPS21/EXOSC3/INTS8/EXOSC7/SSB/EXOSC9/INTS7/EXOSC2/HSD17B10/EXOSC5/POLR3K/TRMT10C/EXOSC8/EXOSC4/FBL/DKC1
BP	GO:0070167	regulation of biomineral tissue development	87	0.683133	2.00433	4.64456e-08	8.64209e-07	5.16325e-07	2392	tags=38%, list=12%, signal=33%	MGP/GREM1/ASPN/DDR2/OMD/TMEM119/PTN/S1PR1/COMP/LTF/MEF2C/LTBP3/TGFB3/TGFB1/GAS6/SRGN/BMP6/ECM1/GPM6B/TWIST1/ALOX5/SLC8A1/ADRB2/PKDCC/BMPR2/ANKH/P2RX7/KL/BMPR1B/NOS3/HEY2/ACVR1/SGMS2
BP	GO:0006521	regulation of cellular amino acid metabolic process	61	-0.647549	-2.18869	4.75516e-08	8.82758e-07	5.27407e-07	4201	tags=69%, list=21%, signal=54%	PSME4/PARK7/PSMD4/PSMD6/PSMD10/PSMD7/PSMF1/PSMC1/PSMB6/PSMD1/PSMA6/PSMD8/PSMD5/PSMC3/PSMB10/PSME1/AZIN1/PSMD12/PSMC6/PSMB9/PSMC2/PSMB2/PSMB4/PSMD13/PSMB1/PSMA7/PSMD11/PSMC4/PSME3/PSMB7/PSMB3/PSMA4/PSMA5/PSMA3/PSMB5/PSMD2/PSMB8/PSMD14/SLC7A11/PSMD3/ODC1/PSME2
CC	GO:0140534	endoplasmic reticulum protein-containing complex	116	-0.537821	-2.05572	4.81209e-08	8.91283e-07	5.325e-07	4977	tags=56%, list=25%, signal=42%	PIGT/KRTCAP2/SEC11C/SPTSSA/EMC7/PIGM/PIGH/RHBDD2/FAF2/SEC11A/TMEM258/MMGT1/ORMDL2/TAP2/DERL1/PIGS/SPCS2/MAGT1/SEC61B/SPTLC1/EMC2/GPAA1/SPCS1/EMC1/SPTLC2/HSD17B12/SSR4/RP9/ORMDL3/PIGA/SEC61G/SEC61A1/GANAB/VCP/DDOST/STT3A/SDF2L1/SREBF2/EMC9/RPN1/OSTC/SRP9/TRAF2/PDIA3/HM13/DPM2/RINT1/EMC6/CALR/ZW10/PRKCSH/AUP1/ELOVL6/P4HB/INSIG1/PDIA6/STT3B/ARL6IP1/SRPRB/HSPA5/EMC8/PIGU/HYOU1/RPN2/TAP1
BP	GO:0048659	smooth muscle cell proliferation	125	0.635215	1.92947	4.82706e-08	8.92015e-07	5.32937e-07	2264	tags=37%, list=11%, signal=33%	CNN1/APOD/OGN/ELN/RBPMS2/IGFBP5/THBS1/MYOCD/ADAMTS1/MMP2/S1PR1/VIP/EFEMP2/PDGFRB/MEF2C/TGFB3/TPM1/PDE1A/NPR1/PRKG1/NR4A3/GJA1/CALCRL/FGF2/PDGFD/TGFBR2/EDN1/HPGD/IGFBP3/IGF1/AIF1/GPER1/PTGIR/CX3CL1/AKR1B1/TGM2/JUN/PTAFR/IL6R/ADIPOQ/NDRG2/GNAI2/NPR3/NPPC/MEF2D/EGFR
BP	GO:0048017	inositol lipid-mediated signaling	187	0.583829	1.8337	4.84329e-08	8.92974e-07	5.33511e-07	3819	tags=47%, list=19%, signal=38%	DCN/SELP/MYOC/ROR2/FGFR1/KIT/FN1/SERPINE2/GSN/PDGFRB/PDGFRA/AGT/NCS1/TEK/F2R/TNFAIP8L3/FGF2/PDGFD/PPP1R16B/CSF1R/PIK3IP1/EDN1/HCST/HCLS1/PTPN13/PREX2/ROR1/PEAR1/PDGFC/IGF1/HGF/GPER1/PLCB4/FYN/TWIST1/PIP4K2A/PIK3CG/PLCL2/PIK3CD/HTR2B/PLCL1/KDR/IRS2/ANGPT1/GAB1/IRS1/GATA3/TGFB2/CD28/PIP5K1C/HTR2A/PTAFR/ZFP36L1/PIK3R1/ADAP2/PIK3R5/MUC5AC/NPR3/NLRC3/EGFR/NGF/FGR/CCL5/GAB2/PLCB2/NTRK2/NCF1/FLT1/PLCD4/…
BP	GO:0048660	regulation of smooth muscle cell proliferation	124	0.638411	1.94086	4.98406e-08	9.16841e-07	5.4777e-07	2264	tags=37%, list=11%, signal=33%	CNN1/APOD/OGN/ELN/RBPMS2/IGFBP5/THBS1/MYOCD/ADAMTS1/MMP2/S1PR1/VIP/EFEMP2/PDGFRB/MEF2C/TGFB3/TPM1/PDE1A/NPR1/PRKG1/NR4A3/GJA1/CALCRL/FGF2/PDGFD/TGFBR2/EDN1/HPGD/IGFBP3/IGF1/AIF1/GPER1/PTGIR/CX3CL1/AKR1B1/TGM2/JUN/PTAFR/IL6R/ADIPOQ/NDRG2/GNAI2/NPR3/NPPC/MEF2D/EGFR
BP	GO:0072395	signal transduction involved in cell cycle checkpoint	72	-0.627337	-2.1967	5.0668e-08	9.29947e-07	5.556e-07	2109	tags=43%, list=11%, signal=39%	CARM1/CNOT10/CASP2/RINT1/TRIAP1/PRMT1/PRPF19/ZW10/CDK2/E2F4/MUC1/BRCC3/PRKDC/CNOT11/BRCA1/ZWILCH/CHEK2/TFDP1/E2F7/CHEK1/CDC25C/E2F8/PCNA/GTSE1/DTL/SFN/E2F1/CDK1/PLK1/CCNB1/AURKA
BP	GO:0007193	adenylate cyclase-inhibiting G protein-coupled receptor signaling pathway	83	0.688636	2.00392	5.34792e-08	9.79322e-07	5.85099e-07	3753	tags=41%, list=19%, signal=33%	FLNA/AKAP12/ADCY5/S1PR1/S1PR3/PALM/EDNRA/RGS2/LPAR1/CHRM2/PDE2A/GNAI1/ADRA2A/EDN1/RGS1/GNAL/ADCY4/GNAZ/PSAPL1/NPY1R/ADCY9/GABBR1/GPR176/GNAI2/NPR3/PSAP/P2RY12/ADCY2/P2RY1/HTR1B/PTGDR2/GRIK3/SSTR2/CHRM3
BP	GO:1903131	mononuclear cell differentiation	402	0.501169	1.63396	5.40934e-08	9.87006e-07	5.8969e-07	3324	tags=37%, list=17%, signal=31%	CCL19/SFRP1/FGL2/CD79A/KIT/ITM2A/CR2/MS4A1/AXL/GPR183/TOX/ITPKB/DTX1/CCR7/CD79B/VCAM1/MAFB/GLI3/ZBTB16/IL34/EGR1/LGALS1/TGFBR2/FZD7/DOCK11/LEPR/CSF1R/EGR3/GAS6/PTPRC/CD27/GLI2/IKZF1/GPR68/SASH3/IL7R/LEF1/LYL1/TREM2/INHBA/BLK/MFNG/NCKAP1L/PDE1B/SLAMF6/IFI16/BCL2/POU2AF1/PLCL2/HLA-DOA/CD19/BTK/DOCK10/CD4/SPN/RORA/PIK3CD/DOCK2/TNFSF8/BCL6/CD2/CARD11/CD3E/PTGER4/CD1D/ITGA4/JAK3/PREX1/STAT5B/PLA2G2D/C…
BP	GO:0000910	cytokinesis	154	-0.488035	-1.94829	5.42189e-08	9.87006e-07	5.8969e-07	1114	tags=21%, list=6%, signal=20%	BCL2L1/GIT1/CENPV/BRCA2/CIT/MYO19/RTKN/KIF20B/E2F7/KIF14/CHMP4C/STMN1/INCENP/CDC25B/E2F8/PLK4/KIF20A/CKAP2/ESPL1/KIF23/RACGAP1/NUSAP1/PRC1/CEP55/KIF4A/CENPA/CDC6/ANLN/AURKB/ECT2/PLK1/AURKA
BP	GO:0007088	regulation of mitotic nuclear division	109	-0.55537	-2.09494	5.42646e-08	9.87006e-07	5.8969e-07	1541	tags=35%, list=8%, signal=32%	AURKAIP1/ZW10/HOXA13/GEN1/SPDL1/KNTC1/MAD2L1BP/SMPD3/PRMT5/RAD21/FBXO5/BUB3/IL1B/BORA/KIF20B/CHEK1/CDC25C/NDC80/ESPL1/RCC1/TTK/BUB1B/PKMYT1/DLGAP5/NUSAP1/TRIP13/CENPF/ZWINT/AURKB/BUB1/PLK1/MAD2L1/MKI67/NEK2/CCNB1/CDT1/AURKA/CDC20
BP	GO:0110149	regulation of biomineralization	89	0.678971	1.99544	5.94194e-08	1.07834e-06	6.44259e-07	3236	tags=44%, list=16%, signal=37%	MGP/GREM1/ASPN/DDR2/OMD/TMEM119/PTN/S1PR1/COMP/LTF/MEF2C/LTBP3/TGFB3/TGFB1/GAS6/SRGN/BMP6/ECM1/GPM6B/TWIST1/ALOX5/SLC8A1/ADRB2/PKDCC/BMPR2/ANKH/P2RX7/KL/BMPR1B/NOS3/HEY2/ACVR1/SGMS2/OSR1/CCR1/ENPP1/FBLN7/ROCK1/BMPR1A
BP	GO:0051282	regulation of sequestering of calcium ion	110	0.646961	1.93321	6.1427e-08	1.11228e-06	6.64537e-07	2563	tags=36%, list=13%, signal=32%	PLN/CCL19/CCL21/JPH2/CASQ2/ATP1A2/ANXA6/APLNR/PKD2/DMD/CCR7/THY1/ANK2/CLIC2/F2R/F2RL3/CACNA1C/FGF2/ITPR1/PTPRC/TRPC1/GPER1/CX3CL1/AKAP6/CD19/HTR2B/SLC8A1/RASA3/CORO1A/PLCG2/HTR2A/GSTM2/BDKRB1/PDE4D/CASQ1/CCR5/SNCA/ITPR2/RYR2/XCR1
BP	GO:0070192	chromosome organization involved in meiotic cell cycle	56	-0.665118	-2.21867	6.46683e-08	1.16836e-06	6.98041e-07	1513	tags=30%, list=8%, signal=28%	P3H4/CCNE2/NCAPH2/BRIP1/RAD21/FANCD2/NCAPD3/INCENP/NCAPD2/SMC4/SMC2/RAD51/NDC1/BUB1B/CCNE1/TRIP13/BUB1
MF	GO:0003684	damaged DNA binding	64	-0.640043	-2.19539	6.6914e-08	1.20624e-06	7.20673e-07	4297	tags=61%, list=22%, signal=48%	RPA1/DDB2/PNKP/RAD1/RPA2/MUTYH/WRN/ERCC2/DDB1/NBN/MSH6/XRCC5/TDG/RAD23A/RAD23B/POLB/APEX1/APTX/RBBP8/RPS3/XRCC6/RAD18/DCLRE1B/HMGB1/NEIL3/RPA3/DCLRE1A/BLM/UNG/MSH2/BRCA1/POLD1/POLQ/FANCG/HMGB2/AUNIP/PCNA/FEN1/RECQL4
BP	GO:0035265	organ growth	147	0.608642	1.87993	6.72903e-08	1.21033e-06	7.23115e-07	2656	tags=38%, list=13%, signal=33%	DDR2/PI16/FGF7/S1PR1/COMP/ANXA6/RGS2/HEG1/EVC/IGF2/PDGFRB/MEF2C/BASP1/BNC2/GLI1/GJA1/FGF10/FGF2/MEIS1/RGS4/TGFBR2/TGFBR3/LEPR/SORBS2/SMO/ZFPM2/EDN1/ACACB/WWC3/SASH3/IGF1/ECM1/THBS3/RBP4/RARB/RSPO2/AKAP6/BCL2/LATS2/FOXC2/STC1/KCNK2/AR/PSAPL1/TGFBR1/TBX2/TGFB2/PIM1/TENM4/NPPC/HEY2/AKAP13/PSAP/NOG/MAPK11/HLX
BP	GO:0048015	phosphatidylinositol-mediated signaling	183	0.58055	1.82184	6.78163e-08	1.21708e-06	7.27152e-07	3819	tags=46%, list=19%, signal=37%	DCN/SELP/MYOC/ROR2/FGFR1/KIT/FN1/SERPINE2/GSN/PDGFRB/PDGFRA/AGT/NCS1/TEK/F2R/FGF2/PDGFD/PPP1R16B/CSF1R/PIK3IP1/EDN1/HCST/HCLS1/PTPN13/PREX2/ROR1/PEAR1/PDGFC/IGF1/HGF/GPER1/PLCB4/FYN/TWIST1/PIP4K2A/PIK3CG/PLCL2/PIK3CD/HTR2B/PLCL1/KDR/IRS2/ANGPT1/GAB1/IRS1/GATA3/TGFB2/CD28/PIP5K1C/HTR2A/PTAFR/ZFP36L1/PIK3R1/PIK3R5/MUC5AC/NPR3/NLRC3/EGFR/NGF/FGR/CCL5/GAB2/PLCB2/NTRK2/NCF1/FLT1/PLCD4/PLCB1/IGF1R/PITP…
BP	GO:0071897	DNA biosynthetic process	179	-0.456734	-1.86348	6.96203e-08	1.24532e-06	7.44022e-07	2640	tags=39%, list=13%, signal=34%	PINX1/TELO2/PARP10/XRCC5/SMG5/WRAP53/HNRNPU/POLB/VCP/TRIM25/POLA1/HNRNPC/CHRAC1/USP10/HNRNPD/POLDIP2/PPARG/NHP2/HNRNPA1/PIF1/WRNIP1/DNAJC2/MYC/MAPK15/PTGES3/HNRNPA2B1/HSP90AA1/POLE/RPA3/POLD3/LIN9/PPIA/FGFR4/SMPD3/CCT4/POLE3/NAT10/CCT2/RFC5/GAR1/TCP1/MEN1/CCT7/CCT3/POLD1/USP43/LIG1/RFC2/POLE2/PHB/CCT8/GRHL2/CCT5/TFDP1/HSP90AB1/CCT6A/POLQ/CHTF18/DSCC1/RFC4/POLD2/DKC1/RFC3/PCNA/DTL/TYMS/CENPF/AURKB…
BP	GO:0006354	DNA-templated transcription, elongation	107	-0.549519	-2.06123	6.97246e-08	1.24532e-06	7.44022e-07	5789	tags=63%, list=29%, signal=44%	ELOF1/GTF2H1/ELP4/TAF1C/CDK13/RNF8/WDR61/ERCC3/GTF2F1/ZNF326/THOC1/CCNT1/ELL3/SHH/POLR2A/POLR2C/DDX39B/IWS1/POLR2K/CDC73/TAF1A/CCNK/PCID2/ENY2/TEFM/TBP/POLR2I/CTR9/POLR2G/ERCC2/MNAT1/POLR1E/TCERG1/HTATSF1/POLR2E/POLR2B/POLR2J/NCBP1/TCEA1/NCBP2/POLR2L/POLR1A/HNRNPU/CDK7/GTF2F2/CCAR2/SUPT16H/CDK12/EAF1/TAF1D/NELFB/NELFE/POLR2D/GTF2H3/LEO1/TSFM/HMGN1/NELFA/NELFCD/ADRM1/POLR1B/SSRP1/WDR43/POLR2H/POLR…
BP	GO:0051985	negative regulation of chromosome segregation	43	-0.725859	-2.27043	7.00051e-08	1.24532e-06	7.44022e-07	1497	tags=51%, list=8%, signal=47%	ZW10/GEN1/SPDL1/KNTC1/MAD2L1BP/RAD21/FBXO5/BUB3/NDC80/TTK/BUB1B/TRIP13/CENPF/ZWINT/AURKB/PTTG1/BUB1/PLK1/MAD2L1/CCNB1/CDT1/CDC20
BP	GO:1905819	negative regulation of chromosome separation	43	-0.725859	-2.27043	7.00051e-08	1.24532e-06	7.44022e-07	1497	tags=51%, list=8%, signal=47%	ZW10/GEN1/SPDL1/KNTC1/MAD2L1BP/RAD21/FBXO5/BUB3/NDC80/TTK/BUB1B/TRIP13/CENPF/ZWINT/AURKB/PTTG1/BUB1/PLK1/MAD2L1/CCNB1/CDT1/CDC20
MF	GO:0005518	collagen binding	66	0.721083	2.05315	7.32219e-08	1.29969e-06	7.76504e-07	1393	tags=42%, list=7%, signal=40%	SPARCL1/COL14A1/PODN/DCN/ASPN/DDR2/AEBP1/LUM/THBS1/ANTXR1/COL6A2/ITGA9/CTSK/COMP/FN1/PCOLCE/MRC2/ECM2/VWF/ITGA1/NID1/SPARC/C1QTNF1/COL6A1/ITGA11/TGFBI/LOX/NID2
BP	GO:0051283	negative regulation of sequestering of calcium ion	109	0.64733	1.93552	7.34203e-08	1.30036e-06	7.76904e-07	2563	tags=37%, list=13%, signal=32%	PLN/CCL19/CCL21/JPH2/CASQ2/ATP1A2/ANXA6/APLNR/PKD2/DMD/CCR7/THY1/ANK2/CLIC2/F2R/F2RL3/CACNA1C/FGF2/ITPR1/PTPRC/TRPC1/GPER1/CX3CL1/AKAP6/CD19/HTR2B/SLC8A1/RASA3/CORO1A/PLCG2/HTR2A/GSTM2/BDKRB1/PDE4D/CASQ1/CCR5/SNCA/ITPR2/RYR2/XCR1
BP	GO:0070585	protein localization to mitochondrion	140	-0.499799	-1.97023	7.48212e-08	1.32228e-06	7.89999e-07	5550	tags=59%, list=28%, signal=43%	MFF/PPP3R1/NDUFA13/UBE2D3/ARIH2/UBL5/SLC25A6/RNF31/PAM16/YWHAB/DNM1L/NMT1/CSNK2A2/USP36/CALM3/BAX/AKT1/BAP1/IMMP1L/PARL/HPS4/YWHAQ/UBE2L3/TP53/HAX1/DNAJC19/TOMM40L/GSK3A/OXA1L/COX18/TIMM22/SAMM50/TOMM20/SAE1/PMPCB/TIMM9/TIMM23/BBC3/TP73/TIMM21/HSPA4/BAG4/YWHAG/CASP8/GRPEL2/ROMO1/TIMM17B/BCS1L/PDCD5/SREBF2/DNAJA1/TIMM50/TIMM44/CHCHD4/TIMM8B/GZMB/TIMM17A/DNAJC15/YWHAZ/TSPO/TIMM10/BID/MTCH2/HSP90AA1…
BP	GO:0006338	chromatin remodeling	172	-0.473153	-1.92823	7.88536e-08	1.3905e-06	8.30761e-07	3114	tags=37%, list=16%, signal=32%	SATB2/RBBP4/RBBP7/SMARCD1/MIS18BP1/CHD1L/PABPC1L/KDM5C/PIH1D1/CDKN2A/FOXA1/PIWIL1/HCFC1/HMGA2/NUDT5/DAXX/ITGB3BP/SMARCB1/HNRNPC/CHRAC1/CHD7/SMARCA4/MTA2/SMARCC1/ACTR5/MYC/HDAC2/CENPL/BEND3/HDAC1/SUV39H2/CENPV/CENPK/CENPQ/SMARCD2/NASP/DNMT1/TRIM28/CENPI/TOP1/RUVBL1/POLE3/SOX9/NPM1/CBX3/HELLS/KAT2A/RUVBL2/ANP32E/CENPO/ACTL6A/SUV39H1/CENPN/CENPH/NPM3/CENPW/CENPU/MIS18A/OIP5/MYB/HMGA1/CENPM/HJURP/CEN…
BP	GO:0150115	cell-substrate junction organization	106	0.651552	1.94476	7.96721e-08	1.40188e-06	8.3756e-07	1995	tags=38%, list=10%, signal=34%	APOD/GREM1/SFRP1/SORBS1/THBS1/FERMT2/MYOC/FAM107A/EPHA3/FN1/PHLDB2/DLC1/THY1/TEK/ITGA5/COL16A1/LRP1/VCL/TLN1/DST/ACVRL1/NRP1/MAPRE2/GPM6B/ACTN1/MACF1/ARHGAP6/LAMC1/BCL2/KDR/CORO2B/ACTN2/IQSEC1/THSD1/LIMCH1/RAB8B/PIK3R1/PEAK1/DUSP3/EFNA5
MF	GO:0045296	cadherin binding	308	-0.391322	-1.68631	8.00144e-08	1.40485e-06	8.39334e-07	3650	tags=43%, list=19%, signal=35%	FLNB/EIF5/RAB10/VAPB/SH3GLB2/RPL23A/PCBP1/MAPRE1/EMD/KLC2/RSL1D1/RPS26/HSPA8/LASP1/SCYL1/EIF2A/PRDX6/PSMB6/STK24/ABCF3/TJP2/CHMP5/BZW1/RPL24/CHMP2B/HNRNPK/SRC/PKN2/PPP1R13L/EIF4H/ARFIP2/CTTN/YKT6/CGN/CORO1B/STAT1/ATXN2L/CC2D1A/NUDC/PKP4/PTPRH/CTNNB1/HCFC1/DNAJB1/SNX5/RPL14/SND1/GPRC5A/LARP1/RPL7A/CAPZA1/TRIM25/CDH17/ANXA2/S100A11/TAGLN2/GIPC1/F11R/PPME1/BSG/EIF2S3/EFHD2/RPL29/GLOD4/ZC3H15/EIF3E/P…
BP	GO:0035296	regulation of tube diameter	123	0.624252	1.89693	8.21785e-08	1.43661e-06	8.58311e-07	3386	tags=41%, list=17%, signal=35%	ACTA2/KCNMA1/CAV1/ATP1A2/COMP/EDNRA/RGS2/AGT/ITGA1/NPR1/PRKG1/F2R/GJA1/KLF2/EDNRB/ADRA2A/EDN1/AGTR1/GJA5/GPER1/AVPR1A/KCNA5/P2RX1/APOE/HTR2B/TBXA2R/SLC8A1/FOXC2/ADRB2/BMPR2/HTR2A/PTAFR/HRH2/AVPR2/SNTA1/NOS3/SCNN1B/EGFR/CPS1/SCPEP1/DOCK4/CD38/ECE1/ADRA1D/P2RY1/DRD1/BDKRB2/ROCK1/HTR1B/ADRB3/SERPINF2
BP	GO:0097746	blood vessel diameter maintenance	123	0.624252	1.89693	8.21785e-08	1.43661e-06	8.58311e-07	3386	tags=41%, list=17%, signal=35%	ACTA2/KCNMA1/CAV1/ATP1A2/COMP/EDNRA/RGS2/AGT/ITGA1/NPR1/PRKG1/F2R/GJA1/KLF2/EDNRB/ADRA2A/EDN1/AGTR1/GJA5/GPER1/AVPR1A/KCNA5/P2RX1/APOE/HTR2B/TBXA2R/SLC8A1/FOXC2/ADRB2/BMPR2/HTR2A/PTAFR/HRH2/AVPR2/SNTA1/NOS3/SCNN1B/EGFR/CPS1/SCPEP1/DOCK4/CD38/ECE1/ADRA1D/P2RY1/DRD1/BDKRB2/ROCK1/HTR1B/ADRB3/SERPINF2
BP	GO:0008217	regulation of blood pressure	171	0.590317	1.8451	8.27512e-08	1.44351e-06	8.62429e-07	3386	tags=40%, list=17%, signal=34%	ACTA2/CPA3/ATP1A2/RAMP2/EDNRA/RARRES2/COL1A2/TPM1/AGT/CES1/NPR1/CD34/ANPEP/F2R/GJA1/VEGFC/CARTPT/CHGA/CTSG/PTGS1/EDNRB/POSTN/NR2F2/GAS6/EDN1/NPR2/AGTR1/CNR1/ACVRL1/GJA5/AVPR1A/CMA1/P2RX1/TBXA2R/TAC3/PTGS2/ADRB2/CORO2B/AR/TAC1/BMPR2/PTAFR/NPY1R/ADIPOQ/AVPR2/BDKRB1/NOS3/NPY/NPR3/RNLS/PDE4D/NISCH/SCPEP1/LNPEP/SGK1/ECE1/PRCP/PCSK5/ADRA1D/POMC/ENPEP/MECP2/DLL1/SUCNR1/CORIN/ADRB3/HMOX1/ADAMTS16/SERPINF2
CC	GO:0015935	small ribosomal subunit	72	-0.621084	-2.17481	8.77902e-08	1.52812e-06	9.12978e-07	5372	tags=78%, list=27%, signal=57%	MRPS36/RPS14/RPS27A/HBA1/EIF2D/DDX3X/RPS20/RPS24/RPS29/RPS8/MRPS11/RPS28/RPS11/RPS3A/RPS13/RPS17/MRPL42/RPS10/RPS12/RPS16/RPS26/MRPS31/MRPS24/RPS4X/EIF2A/MRPS27/RPS5/MRPS18C/RPS6/DAP3/MRPS16/RPS15/LARP4/MRPS33/MRPS7/RPS21/MRPS10/MRPS15/MCTS1/RPS7/MRPS22/RPS18/MRPS18B/MRPS28/RPS19/RPS3/MRPS9/MRPS18A/RPS2/MRPS35/MRPS34/MRPS12/MRPS5/MRPS26/RPSA/MRPS2
BP	GO:0050853	B cell receptor signaling pathway	59	0.736321	2.0539	8.82513e-08	1.53285e-06	9.15804e-07	3279	tags=66%, list=17%, signal=55%	CD79A/MS4A1/RFTN1/PRKCB/MEF2C/CD79B/IGLL5/CD22/PTPRC/BLK/NCKAP1L/BCL2/PAX5/PLCL2/CD19/BTK/PIK3CD/MNDA/STAP1/PRKCH/KLHL6/PLCG2/LPXN/FCRL3/LAT2/FCGR2B/ITK/BMX/NFATC2/BLNK/CD38/FOXP1/CD81/ABL1/IGLL1/LCK/GCSAM/NFAM1/PTPN22
BP	GO:0044773	mitotic DNA damage checkpoint	96	-0.568133	-2.06448	8.84859e-08	1.53363e-06	9.16272e-07	2883	tags=43%, list=15%, signal=37%	CNOT3/RAD9A/MDC1/NBN/PIDD1/CDK5RAP3/HMGA2/CARM1/CNOT10/CASP2/RINT1/TRIAP1/PRMT1/CDK2/E2F4/CCND1/TIPIN/MUC1/PRKDC/DONSON/CNOT11/BLM/TOPBP1/RFWD3/MSH2/EME1/CHEK2/TFDP1/CLSPN/FANCD2/E2F7/TICRR/CDC25C/E2F8/PCNA/GTSE1/SFN/E2F1/CDK1/CCNB1/AURKA
BP	GO:0003151	outflow tract morphogenesis	70	0.699189	2.00255	8.95164e-08	1.54818e-06	9.24963e-07	2541	tags=44%, list=13%, signal=39%	SFRP2/ELN/HAND2/CLDN5/HEYL/MEF2C/NRP2/ROBO1/ISL1/TGFBR2/ENG/TGFBR3/PARVA/SEMA3C/SOX17/ZFPM2/SOX18/CITED2/NRP1/GJA5/TWIST1/RARB/FOXC2/TBX2/BMPR2/TGFB2/NPY1R/PLXND1/HEY2/DHRS3/NOG
BP	GO:0006956	complement activation	69	0.710394	2.03207	9.20924e-08	1.58933e-06	9.49551e-07	2822	tags=48%, list=14%, signal=41%	C7/MFAP4/A2M/CLU/C1S/SERPING1/C1R/C3/CFH/CR2/C4A/C4B/IGLL5/CFD/PROS1/VTN/RGCC/C3AR1/C5AR1/CFI/CD19/VSIG4/CD59/C1RL/C1QA/C1QC/FCN1/C1QB/CFP/CR1/CD81/IGLL1/C6
BP	GO:0055123	digestive system development	131	0.615464	1.87914	1.02949e-07	1.77291e-06	1.05923e-06	2729	tags=37%, list=14%, signal=32%	SFRP2/BARX1/SFRP1/RBPMS2/FOXF1/CLMP/MYOCD/FOXF2/KIT/DACT1/IGF2/RARRES2/PDGFRA/SIX2/TGFB3/DCHS1/TCF21/GLI1/FGF10/GLI3/IL6ST/FAT4/TGFBR2/EDNRB/SOX17/SMO/GLI2/HOXA5/NKX3-2/PKD1/PDGFC/RARB/BCL2/REG1A/PKDCC/TBX2/TGFB2/NKX2-3/CLDN18/SFRP5/NPY/RET/EGFR/CPS1/OTC/SCT/HLX/GIP
BP	GO:0072655	establishment of protein localization to mitochondrion	137	-0.498262	-1.96285	1.09785e-07	1.88663e-06	1.12717e-06	5550	tags=61%, list=28%, signal=44%	UBE2J2/PITRM1/HTRA2/MFF/PPP3R1/NDUFA13/UBE2D3/ARIH2/UBL5/SLC25A6/RNF31/PAM16/YWHAB/NMT1/CSNK2A2/USP36/CALM3/BAX/AKT1/BAP1/IMMP1L/PARL/HPS4/YWHAQ/UBE2L3/TP53/HAX1/DNAJC19/TOMM40L/GSK3A/OXA1L/COX18/TIMM22/SAMM50/TOMM20/SAE1/PMPCB/TIMM9/TIMM23/BBC3/TP73/TIMM21/HSPA4/BAG4/YWHAG/CASP8/GRPEL2/ROMO1/TIMM17B/BCS1L/PDCD5/SREBF2/DNAJA1/TIMM50/TIMM44/CHCHD4/TIMM8B/GZMB/TIMM17A/DNAJC15/YWHAZ/TSPO/TIMM10/BID/…
MF	GO:0061134	peptidase regulator activity	219	0.556075	1.76812	1.10643e-07	1.89734e-06	1.13357e-06	2901	tags=28%, list=15%, signal=24%	SFRP2/FBLN1/A2M/PI16/SERPINF1/SERPING1/CST2/SPOCK1/TIMP2/CAV1/C3/TIMP3/ITIH5/PCSK1N/MAL/FN1/PAPLN/LTF/SERPINE2/GPC3/COL6A3/C4A/PCOLCE/AGT/C4B/RECK/SPOCK2/TIMP1/PROS1/WFDC1/SPINK1/SERPINE1/LXN/PRNP/GAS6/CD27/CD109/SPINK4/NLRP1/ATP2A3/TFPI2/TFPI/CST7/CSTA/PI15/SPINK5/CRIM1/RARRES1/CST6/PINK1/TNFAIP8/SNCA/NGF/COL4A3/TIMP4/APH1B/ITIH3/CST3/PCOLCE2/TNFSF14/NOD1/CARD8
BP	GO:0031047	gene silencing by RNA	149	-0.481949	-1.90935	1.11264e-07	1.90396e-06	1.13753e-06	4603	tags=51%, list=23%, signal=39%	MAP2K2/NUP214/FXR1/POLR2A/ADAR/POLR2C/LIMD1/POLR2K/CNOT1/TP53/METTL3/MAP2K1/ELAVL1/CNOT6/POLR2I/NUP133/FMR1/DROSHA/CNOT7/POLR2G/CLP1/NUP153/POM121/CNOT3/NUP93/POLR2E/POLR2B/EIF4E2/NUP62/ERI1/NUP98/MYCN/POLR2J/NCBP1/NCBP2/SEC13/PIWIL1/POM121C/NUP88/NUP160/NUP54/POLR2L/NUP107/NUP43/SND1/AAAS/CNOT10/AJUBA/AGO2/MOV10/TARBP2/PPARG/NUP155/POLR2D/DHX9/EIF6/NUP85/PABPC1/EIF4G1/TSN/NUP35/SEH1L/MRPL44/HNRN…
CC	GO:0097525	spliceosomal snRNP complex	57	-0.659285	-2.2125	1.12956e-07	1.92883e-06	1.15239e-06	4684	tags=79%, list=24%, signal=60%	PRPF3/PRPF39/RBMX2/SNRPB2/DDX39B/SNRNP70/SF3A3/PRPF31/SART1/LSM8/SART3/HTATSF1/SF3B2/DDX23/TXNL4A/PRPF6/SNRNP40/TXNL4B/LSM6/SF3A2/SF3B5/SNRNP200/USP39/LSM3/SNRPD3/SNRPD2/PRPF40A/SF3B6/LSM7/EFTUD2/PHF5A/PPIH/LSM5/SNRPA/LSM2/SF3B3/SNRPE/SNRPF/PRPF4/SNRPA1/SNRPG/SNRPC/LSM4/SNRPB/SNRPD1
BP	GO:0002697	regulation of immune effector process	382	0.501702	1.63652	1.14945e-07	1.95866e-06	1.17021e-06	3830	tags=39%, list=19%, signal=32%	C7/CCL19/A2M/CLU/IL33/C1S/FOXF1/SERPING1/C1R/FGL2/PGC/C3/IL1R1/CFH/CR2/C4A/TGFB3/C4B/CD36/NR4A3/HTRA1/CD1C/PROS1/TGFB1/CD22/TRIL/PTPRC/VTN/SASH3/IL7R/TYROBP/LAPTM5/BLK/FCER2/SCIMP/SLAMF6/C3AR1/RBP4/MZB1/C5AR1/CFI/ITGAM/WAS/TLR4/PLA2G5/CD19/BTK/IFIT1/VSIG4/CD84/BCL6/STAP1/CD1D/CD59/ANGPT1/JAK3/STAT5B/GPRC5B/C1QA/SPINK5/GATA3/TGFB2/CD28/FES/C1QC/CD1E/CD40LG/ITGB2/PTAFR/FCRL3/IRF4/MR1/CD40/CLC/C1QB/…
BP	GO:0006275	regulation of DNA replication	103	-0.549778	-2.03799	1.20004e-07	2.04058e-06	1.21915e-06	2591	tags=41%, list=13%, signal=36%	SMC3/NBN/ESCO1/DBF4B/MCIDAS/PDS5A/S100A11/ATAD5/DHX9/EHMT2/WRNIP1/ORC5/GTPBP4/HRAS/TIPIN/BRCA2/DONSON/BLM/RFC5/FBXO5/WDR18/CACYBP/DNA2/RFC2/CDC7/CHEK2/ESCO2/E2F7/STOML2/CHTF18/GMNN/DBF4/DSCC1/RFC4/TICRR/E2F8/TIMELESS/RFC3/PCNA/CDC6/CDT1/CCNA2
BP	GO:0051783	regulation of nuclear division	134	-0.515948	-2.02205	1.20566e-07	2.04583e-06	1.22229e-06	1564	tags=30%, list=8%, signal=28%	CALR/AURKAIP1/ZW10/HOXA13/GEN1/SPDL1/KNTC1/MAD2L1BP/SMPD3/PRMT5/RAD21/FBXO5/BUB3/IL1B/BORA/KIF20B/CHEK1/CDC25C/NDC80/ESPL1/RCC1/RAD51AP1/TTK/BUB1B/PKMYT1/DLGAP5/NUSAP1/TRIP13/CENPF/ZWINT/AURKB/BUB1/PLK1/MAD2L1/MKI67/NEK2/CCNB1/CDT1/AURKA/CDC20
BP	GO:0034764	positive regulation of transmembrane transport	194	0.57234	1.80178	1.21896e-07	2.05977e-06	1.23061e-06	3277	tags=38%, list=17%, signal=32%	SORBS1/FLNA/CLIP3/KCNMB1/JPH2/C3/RAMP3/APLNR/GPC3/CCL2/CACNA2D1/PKD2/DMD/THY1/ANK2/ATP1B2/F2R/NR4A3/HSPA2/F2RL3/KCNH2/ITLN1/EHD3/ABCB1/CACNB2/TRPC1/TREM2/IGF1/RHOQ/FXYD1/MEF2A/GPER1/PLP1/CX3CL1/AKAP6/RGS9/CD19/CACNG4/IRS2/KCNE2/ADRB2/IRS1/ACTN2/KLF15/PLCG2/P2RX7/PTAFR/PIK3R1/ADIPOQ/AMIGO1/CREBL2/NLGN3/GSTM2/BDKRB1/RAP1A/GJC2/CASQ1/CCR2/PINK1/SNCA/ITGB1/RYR2/CA2/GIP/RNASEL/ABL1/RGN/TMSB4X/TRPC6/IN…
BP	GO:0034767	positive regulation of ion transmembrane transport	194	0.57234	1.80178	1.21896e-07	2.05977e-06	1.23061e-06	3277	tags=38%, list=17%, signal=32%	SORBS1/FLNA/CLIP3/KCNMB1/JPH2/C3/RAMP3/APLNR/GPC3/CCL2/CACNA2D1/PKD2/DMD/THY1/ANK2/ATP1B2/F2R/NR4A3/HSPA2/F2RL3/KCNH2/ITLN1/EHD3/ABCB1/CACNB2/TRPC1/TREM2/IGF1/RHOQ/FXYD1/MEF2A/GPER1/PLP1/CX3CL1/AKAP6/RGS9/CD19/CACNG4/IRS2/KCNE2/ADRB2/IRS1/ACTN2/KLF15/PLCG2/P2RX7/PTAFR/PIK3R1/ADIPOQ/AMIGO1/CREBL2/NLGN3/GSTM2/BDKRB1/RAP1A/GJC2/CASQ1/CCR2/PINK1/SNCA/ITGB1/RYR2/CA2/GIP/RNASEL/ABL1/RGN/TMSB4X/TRPC6/IN…
MF	GO:0003688	DNA replication origin binding	23	-0.820651	-2.26177	1.27157e-07	2.14419e-06	1.28105e-06	1964	tags=70%, list=10%, signal=63%	POLA1/DHX9/ORC5/MCM8/DDX11/MCM5/MCM6/MCM10/MCM3/HSPD1/MCM7/ORC1/MCM4/CDC45/CDC6/MCM2
CC	GO:0016591	RNA polymerase II, holoenzyme	76	-0.597487	-2.12976	1.38639e-07	2.33294e-06	1.39382e-06	5451	tags=68%, list=28%, signal=50%	SETD5/TBPL1/TAF13/RECQL5/TAF10/GTF2H1/MMS19/WDR61/ERCC3/GTF2F1/RPRD1A/GTF2E1/TAF12/TAF4B/GTF2B/POLR2A/POLR2C/TAF6/POLR2K/CDC73/TAF11/TP53/TAF2/PEX2/TAF6L/TBP/POLR2I/CTR9/TAF5L/TAF9/POLR2G/ERCC2/MYO6/MNAT1/POLR2E/POLR2B/TRRAP/POLR2J/TCEA1/TAF4/POLR2L/CDK7/GTF2F2/RPRD1B/POLR2D/GTF2A2/GTF2H3/LEO1/TAF5/GTF2E2/KAT2A/POLR2H
BP	GO:0045667	regulation of osteoblast differentiation	110	0.641952	1.91824	1.40574e-07	2.35586e-06	1.40752e-06	3324	tags=44%, list=17%, signal=36%	SFRP2/GREM1/SFRP1/HAND2/IGFBP5/DDR2/FERMT2/TMEM119/WWTR1/RASSF2/TWIST2/LTF/MEF2C/PDLIM7/GLI1/CTHRC1/GLI3/VEGFC/IL6ST/PRKD1/BMP6/SNAI2/IGF1/HGF/CHRD/TNN/TWSG1/TWIST1/PTCH1/GDF10/ID3/HOXA2/BMPR2/CRIM1/BMPR1B/IL6R/NPPC/ACVR1/SKI/NOG/LRP3/HDAC7/RUNX2/NPNT/SMOC1/ZHX3/BMPR1A/HDAC4
BP	GO:0051051	negative regulation of transport	394	0.494619	1.61361	1.40583e-07	2.35586e-06	1.40752e-06	3291	tags=30%, list=17%, signal=25%	APOD/PLN/SFRP4/SFRP1/CRYAB/TACR2/MAP1B/THBS1/CASQ2/GEM/FOXF1/GNAO1/CAV1/RRAD/ATP1A2/VIP/KCNE4/EPHA3/SYT11/MAOB/RGS2/SERPINE2/PKIG/PRKCB/MDFIC/PKD2/CLIC2/CD36/TFF2/F2R/GJA1/PTGER3/KCNH2/CARTPT/RAB23/CD200/RGS4/CHGA/PID1/REM1/SPINK1/ADRA2A/EDN1/KLF7/PKIA/PRKD1/GHRL/CNR1/DLG4/PLA2G10/INHBA/LRRK2/GPM6B/TWIST1/DYSF/ITGB3/BCL2/APOE/RIN3/CD84/PEA15/IRS2/STC1/KCNE2/ANGPT1/CORO1A/IRS1/ACTN2/PKDCC/ADCYAP1/…
BP	GO:0045841	negative regulation of mitotic metaphase/anaphase transition	39	-0.73061	-2.25394	1.43272e-07	2.39596e-06	1.43148e-06	1497	tags=54%, list=8%, signal=50%	ZW10/GEN1/SPDL1/KNTC1/MAD2L1BP/RAD21/FBXO5/BUB3/NDC80/TTK/BUB1B/TRIP13/CENPF/ZWINT/AURKB/BUB1/PLK1/MAD2L1/CCNB1/CDT1/CDC20
BP	GO:0035051	cardiocyte differentiation	125	0.625838	1.90098	1.44127e-07	2.40528e-06	1.43705e-06	2408	tags=35%, list=12%, signal=31%	MYH11/GREM1/HAND2/PI16/MYOCD/RGS2/PDGFRB/MEF2C/PDGFRA/BVES/ACTC1/VCAM1/ISL1/TGFB1/RGS4/FZD7/TGFBR3/SEMA3C/SORBS2/SOX17/EDN1/SOX18/PRICKLE1/IGF1/OBSL1/MEF2A/GPER1/TWIST1/RARB/AKAP6/ALPK3/SLC8A1/SPRY1/ACTN2/TBX2/TGFB2/SGCB/TENM4/FHOD3/HEY2/EGFR/ACVR1/FHL2/AKAP13
BP	GO:0000727	double-strand break repair via break-induced replication	12	-0.940215	-2.16051	1.44549e-07	2.40736e-06	1.43829e-06	589	tags=83%, list=3%, signal=81%	GINS4/MCM5/CDC7/MCM6/MCM3/MCM7/GINS2/MCM4/CDC45/MCM2
BP	GO:0043010	camera-type eye development	307	0.51621	1.66568	1.48839e-07	2.47372e-06	1.47793e-06	2565	tags=23%, list=13%, signal=20%	EFEMP1/CRYAB/CYP1B1/COL8A1/SERPINF1/PTN/FBN1/ALDH1A3/COL8A2/TMOD1/ATP2B4/FOXF2/CLIC4/RHOJ/VIM/PDGFRB/PDGFRA/PTPRM/THY1/MAF/FGF10/GLI3/CACNA1C/FGF2/MEIS1/TGFBR2/FZD4/WNT9A/MYOM1/ARHGEF15/SMARCD3/WNT2B/CDON/MITF/ACVRL1/NRP1/INHBA/OBSL1/RBP4/TWSG1/TWIST1/ANGPTL7/LAMB2/SPRY1/FOXC2/TUB/COL4A1/TGFBR1/TBX2/BMPR2/GATA3/TGFB2/NOTCH2/ZHX2/BMPR1B/TENM3/THRB/MAB21L2/AQP5/MERTK/SKIL/RET/NES/CRYBG3/SLITRK6/SKI…
BP	GO:0043491	protein kinase B signaling	243	0.541171	1.72949	1.53381e-07	2.54155e-06	1.51846e-06	3807	tags=41%, list=19%, signal=34%	CCL19/CCL21/IGFBP5/FGF7/THBS1/FERMT2/MYOC/FGFR1/SESN3/KIT/AXL/RAMP3/TMEM100/IGF2/PDGFRB/PDGFRA/CCL2/TSPYL5/CCR7/TEK/TNFAIP8L3/FGF10/FGF2/TGFB1/PHLDA3/C1QTNF1/ENG/RASD2/GAS6/RRAS/HCLS1/BANK1/PEAR1/CX3CR1/IGF1/LOX/HGF/RCN3/GPER1/FYN/CX3CL1/PIK3CG/CD19/PIK3CD/KDR/IRS2/ANGPT1/GAB1/IRS1/TGFBR1/GATA3/CD28/KL/SEMA5A/ZFP36L1/PIK3R1/SFRP5/MAGI2/PIK3R5/FGF18/CD40/MERTK/RET/VAV1/HIP1/F10/PINK1/SH2B3/ITGB1/E…
BP	GO:0030048	actin filament-based movement	145	0.600095	1.85528	1.53548e-07	2.54155e-06	1.51846e-06	2708	tags=34%, list=14%, signal=29%	DES/PLN/FLNA/TPM2/CAV1/ATP1A2/TMOD1/KCNE4/KCNJ8/VIM/GSN/TPM1/CACNA2D1/DMD/ACTC1/ANK2/EPDR1/WIPF1/GJA1/CACNA1C/KCNH2/MYH10/PARVA/SCN4B/KCND3/GJC1/PDPN/CACNB2/PDE4B/GJA5/SCN1B/WAS/KCNA5/MYO5A/STC1/KCNE2/ACTN2/LIMCH1/MYL6/MYO1F/SNTA1/PDE4D/WIPF3/CTNNA3/SUN2/RYR2/MYO9B/MYO1G/KCNJ5
BP	GO:0022900	electron transport chain	158	-0.468081	-1.8832	1.57681e-07	2.60411e-06	1.55583e-06	3857	tags=52%, list=20%, signal=42%	NDUFB10/CYBA/NDUFA7/UQCRC2/NDUFB11/NDUFS5/NDUFS1/UQCRQ/NDUFS8/COX7B/COQ9/NDUFS7/SDHD/NDUFB2/FDX1/NDUFB6/DGUOK/COX7A2L/NDUFC1/NDUFA12/COX10/NDUFB4/COX4I1/NDUFA10/QDPR/SRD5A1/ETFA/COX15/GLDC/COX6B1/NDUFA1/IDH3B/NDUFA9/SDHB/SLC25A13/NDUFA8/NDUFAB1/CIAPIN1/GHITM/GPD2/NDUFA6/AKR1A1/ALDH4A1/DLD/UQCR10/NDUFS3/COX5B/NDUFB9/NDUFS2/COX6C/ASPH/NDUFB3/AIFM2/COX8A/MYBBP1A/CYB561/IDO1/UQCRHL/GSR/GLRX2/UQCC3/CO…
BP	GO:0051225	spindle assembly	106	-0.533785	-1.9987	1.57971e-07	2.60411e-06	1.55583e-06	3134	tags=48%, list=16%, signal=41%	WRAP73/TUBGCP3/HAUS2/MAPRE1/RAB11A/HAUS8/TUBGCP4/CHMP5/HAUS1/CHMP2B/KIF2A/CHMP1A/SMC3/HAUS5/HNRNPU/AAAS/CCSAP/KPNB1/MISP/TUBB/DRG1/HAUS6/RPS3/MAPK15/GPSM2/SMC1A/BCCIP/FBXO5/HSPA1B/KIFC2/CHEK2/SAC3D1/CHMP4C/INCENP/MZT1/KIF23/RCC1/RACGAP1/KIF11/KIFC1/PRC1/SPAG5/KIF4A/CCNB2/AURKB/PLK1/NEK2/MYBL2/AURKA/TPX2/CDC20
BP	GO:0010594	regulation of endothelial cell migration	159	0.593687	1.84265	1.58412e-07	2.60608e-06	1.55701e-06	2448	tags=40%, list=12%, signal=35%	SMOC2/DCN/SERPINF1/THBS1/PTN/SLIT2/FGFR1/AKT3/MEOX2/ATP2B4/MMRN2/RHOJ/MEF2C/NRP2/PTPRM/AGT/RHOB/TEK/SPARC/SRPX2/FGF2/VEGFC/CXCL13/TGFB1/NR2F2/EDN1/RRAS/PRKD1/ETS1/MAP3K3/ACVRL1/NRP1/RGCC/ITGB3/ATOH8/PIK3CG/SASH1/APOE/PIK3CD/TBXA2R/KDR/VASH1/FOXC2/STC1/PTGS2/ANGPT1/STARD13/BMPR2/GATA3/HDAC5/SEMA5A/HSPB1/FLT4/FGF18/CD40/ADAMTS9/NOS3/GLUL/ANXA1/GATA2/HDAC9/STAT5A/BMPER
BP	GO:0051209	release of sequestered calcium ion into cytosol	108	0.641372	1.91656	1.72155e-07	2.82642e-06	1.68865e-06	2563	tags=36%, list=13%, signal=32%	PLN/CCL19/CCL21/JPH2/CASQ2/ATP1A2/APLNR/PKD2/DMD/CCR7/THY1/ANK2/CLIC2/F2R/F2RL3/CACNA1C/FGF2/ITPR1/PTPRC/TRPC1/GPER1/CX3CL1/AKAP6/CD19/HTR2B/SLC8A1/RASA3/CORO1A/PLCG2/HTR2A/GSTM2/BDKRB1/PDE4D/CASQ1/CCR5/SNCA/ITPR2/RYR2/XCR1
BP	GO:0000460	maturation of 5.8S rRNA	34	-0.754427	-2.25291	1.74426e-07	2.85633e-06	1.70653e-06	4116	tags=85%, list=21%, signal=68%	ERI3/RPF1/FTSJ3/NOP9/URB1/UTP20/RCL1/EXOSC10/ERI2/ERI1/MAK16/RPS21/EXOSC3/LAS1L/ABT1/EXOSC7/EXOSC9/EIF6/WDR12/MPHOSPH6/RPP40/EXOSC2/NOP14/PRKDC/PES1/EXOSC8/EXOSC4/RRS1/BOP1
BP	GO:1901796	regulation of signal transduction by p53 class mediator	170	-0.464289	-1.88892	1.74683e-07	2.85633e-06	1.70653e-06	4777	tags=52%, list=24%, signal=40%	CSNK2A2/TAF12/TAF4B/TOP3A/MSX1/ATR/ELL3/RNF34/AKT1/ING5/SETD9/RPA1/TAF6/MBD3/TAF11/TP53/RAD1/TAF2/RPA2/BRD7/TBP/TAF15/BRPF1/MAPKAPK5/WRN/TAF9/PSMD10/TP53RK/RBBP4/RBBP7/HNRNPK/PPP1R13L/RHNO1/ING2/RAD9A/NBN/CSNK2A1/TP73/TAF4/CDK5RAP3/SMYD2/CSNK2B/SUPT16H/ARMC10/RPS7/MTA2/TRIAP1/KDM1A/RBBP8/CDK2/TAF5/EHMT2/EEF1E1/RPF2/BARD1/HDAC2/CDK5/RMI1/HDAC1/TRIM24/MUC1/RPA3/BRIP1/PMAIP1/BLM/TOPBP1/PRMT5/SSRP1/R…
BP	GO:1903039	positive regulation of leukocyte cell-cell adhesion	227	0.544687	1.73088	1.75445e-07	2.85889e-06	1.70805e-06	3187	tags=42%, list=16%, signal=35%	CCL19/CCL21/SELP/CAV1/IGF2/CCL2/ITPKB/CCR7/THY1/VCAM1/NR4A3/GLI3/ZBTB16/IL6ST/LGALS1/TGFBR2/EGR3/PTPRC/CD27/GLI2/ETS1/SASH3/IL7R/HLA-DPB1/LEF1/IGF1/AIF1/NCKAP1L/ST3GAL4/FYN/SELE/CD5/HLA-DPA1/ALOX5/CD4/RASAL3/DOCK8/BCL6/CARD11/CD3E/TNFRSF13C/CD1D/ITGA4/JAK3/STAT5B/CORO1A/TNFSF13B/GATA3/CD28/ZMIZ1/TESPA1/CD40LG/ITGB2/PTAFR/PIK3R1/EBI3/RHOH/HLA-DRA/CD74/CD6/VAV1/CCR2/CD209/ANXA1/HLA-DMB/CCL5/CR1/IGF…
CC	GO:0005859	muscle myosin complex	15	0.930959	2.05677	1.75546e-07	2.85889e-06	1.70805e-06	25	tags=13%, list=0%, signal=13%	MYH11/MYL9
BP	GO:0051784	negative regulation of nuclear division	54	-0.660992	-2.17702	1.76037e-07	2.85956e-06	1.70845e-06	1541	tags=46%, list=8%, signal=43%	MTBP/TOM1L1/AURKAIP1/ZW10/GEN1/SPDL1/KNTC1/MAD2L1BP/RAD21/FBXO5/BUB3/CHEK1/NDC80/TTK/BUB1B/TRIP13/CENPF/ZWINT/AURKB/BUB1/PLK1/MAD2L1/CCNB1/CDT1/CDC20
BP	GO:0030261	chromosome condensation	31	-0.763041	-2.27354	1.76294e-07	2.85956e-06	1.70845e-06	539	tags=55%, list=3%, signal=53%	CHMP1A/HMGA2/BANF1/NCAPH2/AIFM1/NCAPD3/INCENP/NCAPD2/SMC4/SMC2/NCAPG2/NUSAP1/NCAPG/NCAPH/CCNB1/CDCA5/TOP2A
BP	GO:0043044	ATP-dependent chromatin remodeling	71	-0.612623	-2.12642	1.84084e-07	2.97509e-06	1.77748e-06	3227	tags=48%, list=16%, signal=40%	ZNHIT1/RBBP4/RBBP7/MIS18BP1/PIWIL1/ITGB3BP/SMARCB1/HNRNPC/SMARCA4/MTA2/SMARCC1/ACTR5/HDAC2/CENPL/HDAC1/CENPK/CENPQ/SMARCD2/NASP/CENPI/RUVBL1/NPM1/ANP32E/CENPO/ACTL6A/CENPN/CENPH/CENPW/CENPU/MIS18A/OIP5/CENPM/HJURP/CENPA
BP	GO:0043486	histone exchange	40	-0.718901	-2.2153	1.84151e-07	2.97509e-06	1.77748e-06	3740	tags=65%, list=19%, signal=53%	SPTY2D1/ACTR6/ZNHIT1/RBBP4/RBBP7/MIS18BP1/PIWIL1/ITGB3BP/CENPL/CENPK/CENPQ/NASP/CENPI/RUVBL1/NPM1/ANP32E/CENPO/CENPN/CENPH/CENPW/CENPU/MIS18A/OIP5/CENPM/HJURP/CENPA
BP	GO:0045839	negative regulation of mitotic nuclear division	47	-0.689833	-2.19894	1.84656e-07	2.9773e-06	1.7788e-06	2106	tags=53%, list=11%, signal=48%	MTBP/TOM1L1/AURKAIP1/ZW10/GEN1/SPDL1/KNTC1/MAD2L1BP/RAD21/FBXO5/BUB3/CHEK1/NDC80/TTK/BUB1B/TRIP13/CENPF/ZWINT/AURKB/BUB1/PLK1/MAD2L1/CCNB1/CDT1/CDC20
MF	GO:0030020	extracellular matrix structural constituent conferring tensile strength	41	0.78098	2.08818	1.90679e-07	3.06831e-06	1.83317e-06	1674	tags=51%, list=8%, signal=47%	COL14A1/COL8A1/COL6A2/COL3A1/COL8A2/COL10A1/COL15A1/COL6A3/COL1A2/COL16A1/COL5A1/COL4A2/COL1A1/COL6A1/COL4A4/COL4A5/COL5A2/COL18A1/COL12A1/COL4A6/COL4A1
BP	GO:0042391	regulation of membrane potential	412	0.488107	1.59267	1.92485e-07	3.08976e-06	1.84599e-06	3729	tags=30%, list=19%, signal=25%	PLN/FHL1/DCN/FLNA/KCNMA1/CASQ2/CACNA1H/PTN/CAV1/ATP1A2/MYOC/POPDC2/GABRP/KCNE4/CNTNAP1/KCNJ8/DMPK/MEF2C/CACNA2D1/BVES/DMD/ANK2/ATP1B2/CD36/GJA1/CACNA1C/KCNH2/GRIK5/RGS4/CHRNA3/KCNK3/PID1/NLGN2/SCN4B/EDN1/KCND3/EHD3/GHRL/GJC1/SCN7A/CACNB2/CNR1/DLG4/TREM2/FXYD1/GJA5/LRRK2/GPER1/GNA14/TCL1A/RGS7BP/SCN1B/AKAP6/KCNA5/GLRB/BCL2/P2RX1/RNF122/SLC8A1/KDR/CACNG4/KCNE2/KCNK2/ADRB2/MLLT11/ACTN2/TAC1/ADCYAP1/…
CC	GO:0031304	intrinsic component of mitochondrial inner membrane	49	-0.673989	-2.19144	1.93158e-07	3.08976e-06	1.84599e-06	4105	tags=69%, list=21%, signal=55%	COA3/CHCHD6/COX16/PISD/OXA1L/MCU/COX18/SAMM50/SLC25A3/TMEM11/TIMM23/SFXN2/MCUR1/GHITM/IMMT/TIMM17B/MTX1/SLC25A19/COQ2/AFG3L2/DNAJC11/TMEM177/TIMM17A/UQCC3/L2HGDH/SFXN1/SCO2/MTX2/CHCHD3/SFXN4/APOO/CHCHD10/CCDC51/HSPA9
CC	GO:0031305	integral component of mitochondrial inner membrane	49	-0.673989	-2.19144	1.93158e-07	3.08976e-06	1.84599e-06	4105	tags=69%, list=21%, signal=55%	COA3/CHCHD6/COX16/PISD/OXA1L/MCU/COX18/SAMM50/SLC25A3/TMEM11/TIMM23/SFXN2/MCUR1/GHITM/IMMT/TIMM17B/MTX1/SLC25A19/COQ2/AFG3L2/DNAJC11/TMEM177/TIMM17A/UQCC3/L2HGDH/SFXN1/SCO2/MTX2/CHCHD3/SFXN4/APOO/CHCHD10/CCDC51/HSPA9
CC	GO:0072562	blood microparticle	111	0.630876	1.8906	1.98099e-07	3.16255e-06	1.88948e-06	2138	tags=28%, list=11%, signal=25%	ACTG2/A2M/CLU/C1S/SERPING1/C1R/F13A1/C3/CFH/FN1/GSN/C4A/AGT/C4B/ACTC1/STOM/MSN/HSPA2/PROS1/TGFB1/ENG/BCHE/VTN/GC/APOE/C1RL/C1QC/APOA4/C1QB/APOA1/HSPA1A
BP	GO:0009593	detection of chemical stimulus	461	0.474932	1.5517	2.04141e-07	3.25259e-06	1.94327e-06	2785	tags=3%, list=14%, signal=3%	KCNMB1/SSC5D/CASQ2/CST2/TGFB3/C4B/LY96/TREM2/TLR4/TLR1/PIGR/TLR6/RYR2/CLEC7A
BP	GO:0043161	proteasome-mediated ubiquitin-dependent protein catabolic process	410	-0.353462	-1.52908	2.05492e-07	3.26769e-06	1.95229e-06	4530	tags=39%, list=23%, signal=31%	SHH/UBE2A/RNF34/AKT1/ZFAND2B/EDEM2/AGAP3/RHBDD2/FAF2/NSFL1C/RBX1/DCAF11/UBE4A/BAG5/RNF5/PLAA/PSME4/SVIP/RCHY1/UBXN11/SH3RF2/PARK7/RNF19B/PSMD4/DERL1/CUL1/GSK3B/MAN1B1/PCBP2/SHARPIN/SEC61B/EDEM3/PSMD6/GSK3A/ANAPC7/MTA1/USP5/FBXO22/FBXO6/SIRT6/ANKZF1/UBQLN1/FBXL16/RMND5A/UBE2V2/TAF9/NKD2/PSMD10/FBXL14/DESI1/PSMD7/TBL1XR1/RBCK1/PSMF1/AREL1/PSMC1/PSMB6/PSMD1/KEAP1/EIF3H/PSMA6/ANAPC2/DDB1/PSMD8/PSMD5/…
BP	GO:1901888	regulation of cell junction assembly	187	0.57104	1.79353	2.07091e-07	3.28665e-06	1.96362e-06	4118	tags=47%, list=21%, signal=37%	APOD/GREM1/SFRP1/THBS1/FERMT2/CLDN5/NTN1/CAV1/MYOC/FAM107A/EPHA3/MEF2C/PHLDB2/GPBAR1/AGT/DLC1/GPC6/THY1/TEK/PTPRS/SRPX2/GJA1/COL16A1/EPHA7/LRP1/NLGN2/SYNDIG1/GHRL/VCL/ACVRL1/NRP1/SNAI2/FLRT2/GPM6B/MACF1/ARHGAP6/CLSTN3/AMIGO2/KDR/PRKCH/LIMCH1/LRRN1/AMIGO1/NLGN3/PEAK1/DUSP3/EFNA5/LRRC4B/RAP1A/MUSK/SNCA/SLITRK6/DAPK3/MMP14/NTRK2/PPM1F/PTPRD/ABL1/PDLIM5/CLSTN2/MDGA1/DUSP22/PPP1R9A/MYO1C/ROCK1/LDB1/RA…
CC	GO:0005832	chaperonin-containing T-complex	10	-0.956977	-2.10616	2.11883e-07	3.35613e-06	2.00513e-06	830	tags=80%, list=4%, signal=77%	CCT4/CCT2/TCP1/CCT7/CCT3/CCT8/CCT5/CCT6A
BP	GO:0030510	regulation of BMP signaling pathway	85	0.676228	1.97716	2.19511e-07	3.47015e-06	2.07326e-06	2541	tags=35%, list=13%, signal=31%	SFRP2/SFRP4/GREM1/CHRDL1/SFRP1/RBPMS2/GREM2/FBN1/FSTL1/SULF1/HTRA3/GPC3/ZNF423/HTRA1/CDH5/ENG/FSTL3/ACVRL1/CHRD/TWSG1/BMPR2/CRIM1/NOTCH2/SFRP5/SKIL/SMAD7/SKI/NBL1/BMPER/NOG
BP	GO:1902100	negative regulation of metaphase/anaphase transition of cell cycle	41	-0.718454	-2.21298	2.27517e-07	3.58972e-06	2.14469e-06	1497	tags=51%, list=8%, signal=47%	ZW10/GEN1/SPDL1/KNTC1/MAD2L1BP/RAD21/FBXO5/BUB3/NDC80/TTK/BUB1B/TRIP13/CENPF/ZWINT/AURKB/BUB1/PLK1/MAD2L1/CCNB1/CDT1/CDC20
CC	GO:0097060	synaptic membrane	359	0.504021	1.64181	2.43731e-07	3.83805e-06	2.29306e-06	4156	tags=34%, list=21%, signal=28%	CRYAB/KCNMA1/SSPN/ITGA8/GABRP/PALM/ATP2B4/KCTD12/CNTNAP1/SYT11/PDLIM4/NRP2/CNTN1/DMD/ANK2/PTPRS/F2R/SRPX2/CHRM2/PDE2A/CACNA1C/EPHA7/SYNE1/UTRN/GRIK5/CHRNA3/NLGN2/SYNDIG1/KCND3/LZTS1/CNR1/DLG4/SORCS2/PCDH17/GPER1/SNAP25/ADAM23/RGS7BP/CLSTN3/KCNA3/GLRB/ITGB3/RGS9/P2RX1/SLC8A1/CACNG4/EPHA4/STX11/ACTN2/KCNB1/HTR2A/MAGEE1/GRID1/KCND1/NLGN4Y/GABBR1/NLGN3/CNKSR2/SNTA1/LRRC4B/DBN1/STX2/DNM1/TIAM1/MUSK/HI…
BP	GO:0036297	interstrand cross-link repair	51	-0.673971	-2.18526	2.47134e-07	3.88409e-06	2.32056e-06	4339	tags=53%, list=22%, signal=41%	MUS81/RPA1/FANCC/RPA2/FANCL/FANCM/FANCF/XRCC3/MSH6/VCP/FANCB/DCLRE1B/MCM8/NEIL3/RPA3/FANCE/DCLRE1A/USP1/RFWD3/EME1/FANCD2/FANCG/FANCA/RAD51/FANCI/RAD51AP1/UBE2T
BP	GO:0006613	cotranslational protein targeting to membrane	99	-0.546616	-2.00217	2.55546e-07	4.0085e-06	2.3949e-06	6190	tags=78%, list=31%, signal=54%	RPL10A/SRP19/RPL15/RPL23/RPLP1/UBA52/RPL27A/RPL39/RPL28/RPL17/RPL37/SIL1/RPS14/SSR2/RPL5/RPS27A/RPS20/RPL31/RPS24/RPS29/RPS8/RPL3/ZFAND2B/RPL6/RPS28/RPL9/RPL30/RPS11/RPL36/RPS3A/RPS13/RPL4/RPS17/RPL35A/RPL32/RPL41/SEC61B/RPL38/RPS10/RPS12/RPS16/RPL23A/SSR3/RPL18A/RPS26/RPS4X/RPS5/RPL24/RPLP2/RPS6/RPL37A/RPL36A/RPL19/SRP72/SRP68/RPL35/SRP54/RPS15/SEC61A1/RPL7/RPL14/RPS21/SSR1/RPL7A/RPL29/RPLP0/RPL…
BP	GO:0007044	cell-substrate junction assembly	100	0.648748	1.92788	2.62577e-07	4.11083e-06	2.45603e-06	1995	tags=36%, list=10%, signal=33%	APOD/GREM1/SFRP1/SORBS1/THBS1/FERMT2/MYOC/FAM107A/EPHA3/FN1/PHLDB2/DLC1/THY1/TEK/ITGA5/COL16A1/LRP1/VCL/TLN1/DST/ACVRL1/NRP1/GPM6B/ACTN1/MACF1/ARHGAP6/LAMC1/BCL2/KDR/CORO2B/ACTN2/THSD1/LIMCH1/PEAK1/DUSP3/EFNA5
BP	GO:0001510	RNA methylation	71	-0.608812	-2.11319	2.78265e-07	4.34802e-06	2.59774e-06	5800	tags=76%, list=29%, signal=54%	TRMT2B/CMTR1/TRMT44/CMTR2/WTAP/TRMT1L/DIMT1/TYW3/PCIF1/FDXACB1/RNMT/MTO1/NSUN4/EMG1/TRMT13/NSUN6/TRMT61B/HENMT1/ZCCHC4/METTL2B/TRMT5/RBM15B/METTL15/METTL3/FTSJ3/MEPCE/CBLL1/METTL1/THUMPD2/TARBP1/TRMT10A/TRMT112/RBM15/THUMPD3/METTL2A/TRMT61A/TRMT2A/TFB1M/METTL5/FTSJ1/TRMT6/MRM1/TRMT11/NSUN5/WDR4/TGS1/TRMT1/TFB2M/GTPBP3/HSD17B10/TRMT10C/NSUN2/FBL/NOP2
BP	GO:0008037	cell recognition	158	0.58395	1.81085	2.90089e-07	4.52228e-06	2.70186e-06	3155	tags=34%, list=16%, signal=29%	CCL19/CCL21/NEXN/NDN/PALLD/EPHA3/PECAM1/VCAN/VSTM2L/FOLR2/COLEC12/C4B/CXCR4/CCR7/CD36/MSN/IGLL5/ROBO1/MFGE8/ST6GALNAC6/CNR1/PEAR1/CNTN4/TNN/EMB/CD5/HVCN1/PLA2G5/GAP43/DOCK8/DOCK2/TUB/EPHA4/ROBO4/NTM/SEMA5A/AMIGO1/PTX3/FCN1/PCDH12/CD6/SEMA3A/CD209/RTN4/CADM1/NCR3/CD81/CLEC7A/IGLL1/EFNB3/NCAM2/SPESP1/HAVCR2/MEGF8
BP	GO:0022898	regulation of transmembrane transporter activity	250	0.525498	1.67889	2.90535e-07	4.52228e-06	2.70186e-06	3753	tags=34%, list=19%, signal=28%	PLN/FHL1/JPH2/CASQ2/GEM/FXYD6/CAV1/RRAD/ATP1A2/KCNE4/MEF2C/CCL2/CACNA2D1/PKD2/DMD/ANK2/STOM/ATP1B2/CLIC2/GJA1/HSPA2/UTRN/AHNAK/NLGN2/SCN4B/REM1/PRNP/ADRA2A/EHD3/ABCB1/CACNB2/PDE4B/DLG4/TREM2/FXYD1/TWIST1/VAMP2/SCN1B/AKAP6/BCL2/RGS9/CACNG4/KCNE2/ADRB2/ACTN2/RASGRF2/PLCG2/PTAFR/PIM1/AMIGO1/NLGN3/GSTM2/DAPK1/PDE4D/CASQ1/CCR2/PINK1/SNCA/ITGB1/SLMAP/PRRT1/RYR2/GRIN2A/HECW2/OSR1/RGN/TMSB4X/TRPC6/KCNAB1…
BP	GO:0035150	regulation of tube size	124	0.622462	1.89237	2.98045e-07	4.63029e-06	2.76638e-06	3386	tags=41%, list=17%, signal=34%	ACTA2/KCNMA1/CAV1/ATP1A2/COMP/EDNRA/RGS2/AGT/ITGA1/NPR1/PRKG1/F2R/GJA1/KLF2/EDNRB/ADRA2A/EDN1/AGTR1/GJA5/GPER1/AVPR1A/KCNA5/P2RX1/APOE/HTR2B/TBXA2R/SLC8A1/FOXC2/ADRB2/BMPR2/HTR2A/PTAFR/HRH2/AVPR2/SNTA1/NOS3/SCNN1B/EGFR/CPS1/SCPEP1/DOCK4/CD38/ECE1/ADRA1D/P2RY1/DRD1/BDKRB2/ROCK1/HTR1B/ADRB3/SERPINF2
BP	GO:0006614	SRP-dependent cotranslational protein targeting to membrane	94	-0.553539	-2.01198	3.00223e-07	4.6531e-06	2.78001e-06	6190	tags=78%, list=31%, signal=54%	RPL10A/SRP19/RPL15/RPL23/RPLP1/UBA52/RPL27A/RPL39/RPL28/RPL17/RPL37/RPS14/RPL5/RPS27A/RPS20/RPL31/RPS24/RPS29/RPS8/RPL3/ZFAND2B/RPL6/RPS28/RPL9/RPL30/RPS11/RPL36/RPS3A/RPS13/RPL4/RPS17/RPL35A/RPL32/RPL41/SEC61B/RPL38/RPS10/RPS12/RPS16/RPL23A/SSR3/RPL18A/RPS26/RPS4X/RPS5/RPL24/RPLP2/RPS6/RPL37A/RPL36A/RPL19/SRP72/SRP68/RPL35/SRP54/RPS15/SEC61A1/RPL7/RPL14/RPS21/RPL7A/RPL29/RPLP0/RPL18/RPS7/SRP9/RP…
BP	GO:0042113	B cell activation	244	0.538033	1.7164	3.00664e-07	4.6531e-06	2.78001e-06	3400	tags=41%, list=17%, signal=34%	SFRP1/CD79A/KIT/ITM2A/CR2/MS4A1/PRKCB/MEF2C/GPR183/CD79B/IGLL5/VCAM1/TGFB1/LGALS1/DOCK11/GAPT/CD22/PTPRC/CD27/SASH3/IL7R/BANK1/LEF1/TYROBP/LYL1/LAPTM5/INHBA/BLK/MFNG/NCKAP1L/MZB1/TLR4/BCL2/POU2AF1/PLCL2/CD19/BTK/DOCK10/PIK3CD/BST1/FCRL1/MNDA/BCL6/CARD11/IRS2/TNFRSF13C/ITGA4/JAK3/STAT5B/SWAP70/CD180/TNFSF13B/LAX1/CD28/NOTCH2/HDAC5/PLCG2/CD40LG/NKX2-3/ZFP36L1/PIK3R1/SAMSN1/FCRL3/CD40/LAT2/CD74/TBC1…
BP	GO:1903169	regulation of calcium ion transmembrane transport	135	0.609605	1.8681	3.1138e-07	4.80976e-06	2.87361e-06	2256	tags=33%, list=11%, signal=29%	PLN/JPH2/CASQ2/GEM/RRAD/ATP1A2/RAMP3/APLNR/CACNA2D1/PKD2/DMD/THY1/ANK2/CLIC2/F2R/HSPA2/F2RL3/CACNA1C/AHNAK/REM1/PRNP/ADRA2A/EHD3/CACNB2/PDE4B/TRPC1/GPER1/FYN/PLP1/CX3CL1/AKAP6/PIK3CG/RGS9/CD19/SLC8A1/KCNE2/CORO1A/PLCG2/GSTM2/BDKRB1/GJC2/PDE4D/CASQ1/SNCA
CC	GO:0031261	DNA replication preinitiation complex	12	-0.932502	-2.14278	3.18731e-07	4.90521e-06	2.93063e-06	961	tags=92%, list=5%, signal=87%	GINS3/GINS4/MCM5/MCM6/MCM3/GINS1/MCM7/GINS2/MCM4/CDC45/MCM2
CC	GO:0034708	methyltransferase complex	93	-0.548657	-1.98705	3.18772e-07	4.90521e-06	2.93063e-06	5309	tags=61%, list=27%, signal=45%	KMT2D/RNF2/KMT2B/ZNF335/TRMT61B/SETD1A/SENP3/TRIM37/TEX10/TAF6/PAGR1/RBM15B/EED/METTL3/PHF19/PRDM4/PRPF31/CBLL1/METTL1/TAF9/MTF2/E2F6/RBBP5/RBBP4/DPY30/RBBP7/RBM15/NCOA6/MCRS1/PELP1/TRMT61A/TAF4/HCFC1/TRMT6/RIOK1/SNRPD3/LAS1L/SNRPD2/CLNS1A/PAXIP1/WDR4/PRMT1/SUZ12/WDR77/HDAC2/ERH/SNRPE/RUVBL1/PRMT5/SNRPF/MEN1/RUVBL2/SNRPG/WDR5/SNRPB/SNRPD1/EZH2
BP	GO:0051208	sequestering of calcium ion	114	0.624568	1.87733	3.44416e-07	5.28976e-06	3.16039e-06	2563	tags=35%, list=13%, signal=31%	PLN/CCL19/CCL21/JPH2/CASQ2/ATP1A2/ANXA6/APLNR/PKD2/DMD/CCR7/THY1/ANK2/CLIC2/F2R/F2RL3/CACNA1C/FGF2/ITPR1/PTPRC/TRPC1/GPER1/CX3CL1/AKAP6/CD19/HTR2B/SLC8A1/RASA3/CORO1A/PLCG2/HTR2A/GSTM2/BDKRB1/PDE4D/CASQ1/CCR5/SNCA/ITPR2/RYR2/XCR1
BP	GO:0042769	DNA damage response, detection of DNA damage	38	-0.721858	-2.21904	3.49234e-07	5.3536e-06	3.19853e-06	1776	tags=71%, list=9%, signal=65%	MRPS11/RBX1/RPA1/PNKP/RFC1/RPA2/DDB1/HMGA2/DNAJA1/CUL4A/RPS3/PARP1/RAD18/MRPS9/MRPS35/RPA3/POLD3/USP1/MRPS26/RFC5/POLD1/RFC2/RFC4/POLD2/RFC3/PCNA/DTL
BP	GO:1901343	negative regulation of vasculature development	90	0.663938	1.94852	3.58733e-07	5.48882e-06	3.27931e-06	2299	tags=40%, list=12%, signal=35%	THBS4/DCN/SERPINF1/THBS1/EMILIN1/CLDN5/PTN/ADAMTS1/ISM1/THBS2/SULF1/ATP2B4/PTPRM/NPR1/TEK/SPARC/HSPG2/TIE1/KLF2/ECSCR/COL4A2/SERPINE1/STAB1/HOXA5/GHRL/SEMA6A/RGCC/ALOX5/ANGPTL7/VASH1/SEMA3E/SPINK5/TGFB2/ADAMTS9/CCR2/COL4A3
MF	GO:0030414	peptidase inhibitor activity	179	0.566457	1.78021	3.60646e-07	5.50768e-06	3.29058e-06	2360	tags=26%, list=12%, signal=23%	A2M/PI16/SERPINF1/SERPING1/CST2/SPOCK1/TIMP2/C3/TIMP3/ITIH5/PCSK1N/PAPLN/LTF/SERPINE2/GPC3/COL6A3/C4A/AGT/C4B/RECK/SPOCK2/TIMP1/PROS1/WFDC1/SPINK1/SERPINE1/LXN/PRNP/GAS6/CD27/CD109/SPINK4/TFPI2/TFPI/CST7/CSTA/PI15/SPINK5/CRIM1/RARRES1/CST6/TNFAIP8/SNCA/NGF/COL4A3/TIMP4
BP	GO:0009060	aerobic respiration	77	-0.591705	-2.11054	3.64736e-07	5.55017e-06	3.31597e-06	3697	tags=74%, list=19%, signal=60%	NNT/SURF1/SLC25A14/SDHAF2/DHTKD1/NDUFA4/DLST/IDE/PDHB/BLOC1S1/UQCRB/UCN/FAHD1/MDH1/IDH3G/OXA1L/UQCRC2/IREB2/NDUFS8/COX7B/NDUFS7/SDHD/ACO2/COX7A2L/COX10/COX4I1/FXN/COX15/COX6B1/IDH3B/SUCLG1/SDHB/VCP/SUCLA2/IDH3A/DLD/UQCR10/COX5B/COX6C/CS/COX8A/IDH2/UQCRHL/MTFR1/COX6A1/UQCRH/PDHA1/SDHA/FH/COX5A/DLAT/UQCRC1/MDH2/IDH1/CYCS/MTFR2/SHMT2
MF	GO:0016874	ligase activity	125	-0.50761	-1.972	3.648e-07	5.55017e-06	3.31597e-06	4618	tags=54%, list=23%, signal=41%	UBA5/CARS2/MTHFS/SLC27A5/HARS2/PPCS/ATP6V0C/HLCS/GATB/DALRD3/UBA2/WARS2/ACSL5/ATP6V1A/RTCB/AACS/LIG3/ACSM3/CTPS2/GATC/ACSL3/SAE1/MCCC1/GCLM/EARS2/LIPT2/FPGS/SUCLG1/ACACA/SLC27A4/SUCLA2/TRIM25/RTCA/UBA6/QRSL1/VARS2/PFAS/PARS2/UBA1/NAE1/ASNS/TARS2/ACSS2/GART/YARS2/NAPRT/AARS2/CTPS1/PCCB/MCCC2/CAD/MTHFD1L/LARS2/NARS2/FARSB/GMPS/FARSA/IARS2/TTLL4/LIG1/MARS2/MTHFD1/SLC27A2/GSS/DARS2/ASS1/PAICS
BP	GO:0007224	smoothened signaling pathway	123	0.610632	1.85554	3.65892e-07	5.55634e-06	3.31965e-06	3944	tags=42%, list=20%, signal=34%	SFRP1/BOC/FOXF1/GAS1/ROR2/EVC/SERPINE2/PRRX1/GPC3/PTCH2/ZNF423/GLI1/FGF10/GLI3/GLIS2/PRKACB/TGFBR2/RAB34/SMO/GLI2/DZIP1/CDON/CC2D2A/HHIP/PTCH1/RORA/CD3E/FUZ/SCUBE1/ARMC9/EVC2/NDST1/TXNDC15/DYNC2H1/GPR161/TTBK2/PTCHD1/DHH/FBXL17/KIF7/ENPP1/TCTN1/MEGF8/TTC23/CREBBP/DZIP1L/HIPK2/NKX6-1/IHH/SUFU/CHSY1/FGFR2
CC	GO:0071162	CMG complex	10	-0.951782	-2.09472	3.81326e-07	5.77987e-06	3.45321e-06	961	tags=100%, list=5%, signal=95%	GINS4/MCM5/MCM6/MCM3/GINS1/MCM7/GINS2/MCM4/MCM2
BP	GO:0000959	mitochondrial RNA metabolic process	43	-0.708263	-2.2154	3.82334e-07	5.78432e-06	3.45586e-06	4106	tags=72%, list=21%, signal=57%	TRMT5/TEFM/WARS2/TRIT1/TRMT10A/ELAC2/EARS2/PDE12/TFB1M/TFAM/CDK5RAP1/SUPV3L1/POLRMT/FASTKD1/FASTKD5/TARS2/YARS2/SLIRP/TFB2M/AARS2/SLC25A33/HSD17B10/GRSF1/PUS1/TRMT10C/PNPT1/CHCHD10/TBRG4/LRPPRC/MRPL12/DARS2
BP	GO:0016525	negative regulation of angiogenesis	88	0.664109	1.95022	3.85271e-07	5.81788e-06	3.47591e-06	2299	tags=40%, list=12%, signal=35%	THBS4/DCN/SERPINF1/THBS1/EMILIN1/CLDN5/PTN/ADAMTS1/ISM1/THBS2/SULF1/ATP2B4/PTPRM/NPR1/TEK/SPARC/HSPG2/TIE1/KLF2/ECSCR/COL4A2/SERPINE1/STAB1/HOXA5/GHRL/SEMA6A/RGCC/ALOX5/VASH1/SEMA3E/SPINK5/TGFB2/ADAMTS9/CCR2/COL4A3
BP	GO:0046651	lymphocyte proliferation	275	0.523533	1.68112	3.88892e-07	5.86162e-06	3.50205e-06	3332	tags=39%, list=17%, signal=32%	CCL19/CD79A/LRRC32/CR2/MS4A1/IGF2/MEF2C/GPR183/GPNMB/MSN/VCAM1/FGF10/IL6ST/TGFBR2/GAPT/CD22/PRNP/PTPRC/SASH3/IL7R/HLA-DPB1/LEF1/TYROBP/BLK/IGF1/AIF1/NCKAP1L/FYN/TWSG1/MZB1/TLR4/HLA-DPA1/BCL2/PIK3CG/PLCL2/CD19/BTK/CD4/SPN/VSIG4/RASAL3/DOCK8/BST1/DOCK2/MNDA/TNFSF8/BCL6/CARD11/CD3E/IRS2/TNFRSF13C/CD1D/MAPK8IP1/JAK3/STAT5B/PLA2G2D/CORO1A/LMO1/CD180/TAC1/LST1/TNFSF13B/CD28/CD40LG/EBI3/FCRL3/CD40/CLC/C…
BP	GO:0006605	protein targeting	422	-0.345052	-1.49958	3.91466e-07	5.88945e-06	3.51867e-06	5865	tags=52%, list=30%, signal=37%	HMGCL/EPHX2/ZDHHC24/UBA52/AP3M1/RPL27A/UBE2J2/ACOT4/RPL39/PITRM1/PEX13/HTRA2/EDEM1/VPS4A/HSD17B4/ICMT/PIK3R4/RPL28/RPL17/RPL37/SIL1/MFF/PRKCI/NDUFA13/UBE2D3/ARIH2/UBL5/GOLGA7/HACL1/SLC25A6/RPS14/SSR2/NACA/RAB7A/AP4M1/IDE/RPL5/RPS27A/RNF31/M6PR/PAM16/YWHAB/AGPS/TCAF1/PECR/RPS20/SNX16/RAB3IP/RPL31/VTI1A/AQP11/CSNK2A2/USP36/RPS24/RPS29/RPS8/CHP1/ACAA1/PEX3/RPL3/BAP1/IMMP1L/ZFAND2B/RPL6/RPS28/RPL9/RP…
BP	GO:0097529	myeloid leukocyte migration	207	0.555056	1.75158	3.9314e-07	5.90367e-06	3.52717e-06	3195	tags=43%, list=16%, signal=36%	THBS4/CCL19/GREM1/CCL21/THBS1/EMILIN1/CXCL12/JAM3/IL1R1/SLIT2/DUSP1/ROR2/CCL11/PECAM1/KIT/RARRES2/CCL2/ITGA1/CCR7/VEGFC/PDGFD/CXCL13/IL34/CD200/CHGA/SCG2/EDNRB/CSF1R/SERPINE1/CAMK1D/EDN1/PDE4B/MMP28/TREM2/CX3CR1/AIF1/NCKAP1L/CD99L2/C3AR1/C5AR1/CX3CL1/PIK3CG/CXCL17/RIN3/PIK3CD/CCL22/BST1/PTGER4/VEGFB/STAP1/PREX1/STAT5B/SWAP70/CMKLR1/CCL14/TGFB2/PIP5K1C/ITGB2/IL6R/RHOH/CD74/VAV1/CCL23/CCR2/ANXA1/MP…
BP	GO:0030168	platelet activation	156	0.591541	1.83428	4.0195e-07	6.02479e-06	3.59953e-06	3297	tags=42%, list=17%, signal=36%	MYL9/FLNA/SELP/CSRP1/COL3A1/COMP/AXL/FN1/SERPINE2/PRKCB/PDGFRA/COL1A2/THBD/VWF/PRKG1/F2R/F2RL3/ITPR1/C1QTNF1/COL1A1/F2RL2/ADRA2A/PDPN/VCL/GNG2/TLN1/PEAR1/BLK/GNA14/FYN/ILK/TLR4/ITGB3/PIK3CG/P2RX1/APOE/PRKCH/PLCG2/CD40LG/PIK3R1/HSPB1/PIK3R5/CD40/NOS3/MERTK/VAV1/SH2B3/PLEK/ITPR2/LCP2/GP1BA/FERMT3/DGKA/P2RY12/FCER1G/LCK/PIK3R6/TRPC6/GNAQ/P2RY1/PRKCG/DGKG/MYH9/ARRB1/TREML1/PDGFA
BP	GO:2001252	positive regulation of chromosome organization	156	-0.471775	-1.88554	4.04769e-07	6.05582e-06	3.61807e-06	4122	tags=44%, list=21%, signal=35%	PNKP/TP53/PHF19/RNF40/BRD7/RIF1/CTR9/NAF1/MAPKAPK5/CHTOP/SIRT6/FMR1/SPHK2/SNW1/MTF2/SART3/CTBP1/ACD/ING2/PIH1D1/UBE2N/NBN/LIF/XRCC5/SFPQ/CTNNB1/NABP2/SMARCB1/ZBTB7B/RPS6KA4/HNRNPD/NELFE/HNRNPA1/PAXIP1/KDM1A/MAPK15/DDX11/SSBP1/HNRNPA2B1/MUC1/MAD2L1BP/DNMT1/TRIM28/DNMT3B/CCT4/RAD21/CCT2/TCP1/KAT2A/CCT7/RUVBL2/BRCA1/WDR5/IL1B/CCT3/SREBF1/CCT8/CCT5/VEGFA/CCT6A/GNL3/DKC1/MYB/FEN1/AURKB/NEK2/CCNB1/CDT1
MF	GO:0051371	muscle alpha-actinin binding	15	0.924359	2.04219	4.12177e-07	6.15528e-06	3.6775e-06	497	tags=47%, list=3%, signal=46%	SYNPO2/PDLIM3/PALLD/LDB3/PDLIM4/PDLIM7/PKD2
BP	GO:0051251	positive regulation of lymphocyte activation	272	0.524283	1.68334	4.20087e-07	6.26184e-06	3.74116e-06	3332	tags=41%, list=17%, signal=34%	CCL19/CCL21/CAV1/AXL/IGF2/MEF2C/GPR183/CCL2/TOX/ITPKB/CCR7/THY1/IGLL5/VCAM1/FGF10/GLI3/ZBTB16/IL6ST/TGFB1/LGALS1/TGFBR2/EGR3/GAS6/PTPRC/CD27/GLI2/SASH3/IL7R/HLA-DPB1/LEF1/TYROBP/IGF1/AIF1/NCKAP1L/FYN/CD5/TLR4/HLA-DPA1/BCL2/BTK/CD4/RASAL3/DOCK8/BST1/BCL6/CARD11/CD3E/IRS2/TNFRSF13C/CD1D/JAK3/STAT5B/CORO1A/TAC1/TNFSF13B/GATA3/CD28/ZMIZ1/TESPA1/CD40LG/PIK3R1/EBI3/FCRL3/CD40/RHOH/HLA-DRA/CD74/CD6/VAV1…
BP	GO:0051017	actin filament bundle assembly	146	0.601524	1.85751	4.23572e-07	6.29063e-06	3.75836e-06	3512	tags=46%, list=18%, signal=38%	SYNPO2/DPYSL3/ELN/SFRP1/SORBS1/CALD1/FLNA/FERMT2/S1PR1/SYNPO/MYOC/FAM107A/TGFB3/PHLDB2/TPM1/LPAR1/DLC1/CGNL1/RDX/EVL/ARHGEF15/NRP1/AIF1/ASAP3/RGCC/ACTN1/PFN2/ARHGAP6/LCP1/CX3CL1/WAS/NEDD9/PTGER4/SWAP70/CORO2B/ARHGEF10/TAC1/TGFBR1/LIMCH1/SPIRE1/PIK3R1/ZYX/CCDC88A/APOA1/SORBS3/PLEK/GPR65/NOX4/PPM1F/ADD1/PHACTR1/ITGB5/MARCKS/ABL1/FSCN1/PPP1R9A/PLS3/RAPGEF3/INPP5K/ROCK1/ARRB1/WASF2/AIF1L/SERPINF2/ARH…
BP	GO:0061572	actin filament bundle organization	146	0.601524	1.85751	4.23572e-07	6.29063e-06	3.75836e-06	3512	tags=46%, list=18%, signal=38%	SYNPO2/DPYSL3/ELN/SFRP1/SORBS1/CALD1/FLNA/FERMT2/S1PR1/SYNPO/MYOC/FAM107A/TGFB3/PHLDB2/TPM1/LPAR1/DLC1/CGNL1/RDX/EVL/ARHGEF15/NRP1/AIF1/ASAP3/RGCC/ACTN1/PFN2/ARHGAP6/LCP1/CX3CL1/WAS/NEDD9/PTGER4/SWAP70/CORO2B/ARHGEF10/TAC1/TGFBR1/LIMCH1/SPIRE1/PIK3R1/ZYX/CCDC88A/APOA1/SORBS3/PLEK/GPR65/NOX4/PPM1F/ADD1/PHACTR1/ITGB5/MARCKS/ABL1/FSCN1/PPP1R9A/PLS3/RAPGEF3/INPP5K/ROCK1/ARRB1/WASF2/AIF1L/SERPINF2/ARH…
BP	GO:0014065	phosphatidylinositol 3-kinase signaling	147	0.592372	1.82968	4.4201e-07	6.55243e-06	3.91477e-06	2565	tags=37%, list=13%, signal=32%	DCN/SELP/MYOC/ROR2/FGFR1/KIT/FN1/SERPINE2/PDGFRB/PDGFRA/AGT/TEK/F2R/FGF2/PDGFD/PPP1R16B/PIK3IP1/EDN1/HCST/HCLS1/PTPN13/PREX2/ROR1/PEAR1/PDGFC/IGF1/HGF/GPER1/FYN/TWIST1/PIP4K2A/PIK3CG/PIK3CD/HTR2B/KDR/IRS2/ANGPT1/GAB1/IRS1/GATA3/TGFB2/CD28/PIP5K1C/HTR2A/ZFP36L1/PIK3R1/PIK3R5/NLRC3/EGFR/FGR/CCL5/NTRK2/NCF1/FLT1
BP	GO:0060284	regulation of cell development	462	0.478304	1.56272	4.4471e-07	6.5804e-06	3.93149e-06	3958	tags=37%, list=20%, signal=30%	FBLN1/FLNA/FRZB/SERPINF1/MAP1B/LIMS2/FERMT2/NGFR/CLDN5/PTN/CXCL12/FBN1/NTN1/HEYL/DAAM2/MYOC/SLIT2/PDE3A/S1PR3/CCL11/KIT/FN1/LTF/SERPINE2/CXCR4/THY1/MYADM/BHLHE41/RECK/PTPRS/GLI3/ROBO1/VEGFC/EPHA7/IL6ST/CDH5/IL34/TGFB1/SEMA3G/LRP1/NFATC4/MAP6/SEMA3C/EGR2/EDNRB/POSTN/SMO/PLXNA4/L1CAM/SMARCD3/NPR2/VCL/GPR68/SEMA6A/NRP1/TYROBP/CX3CR1/CRABP2/IGF1/OBSL1/PLXNC1/LRRK2/GPER1/MACF1/SEMA6B/CX3CL1/ILK/HOOK3/…
CC	GO:0005839	proteasome core complex	20	-0.832689	-2.19717	4.52104e-07	6.6776e-06	3.98956e-06	3229	tags=80%, list=16%, signal=67%	PSMF1/PSMB6/PSMA6/PSMB10/PSMB9/PSMB2/PSMB4/PSMB1/PSMA7/PSMB7/PSMB3/PSMA4/PSMA5/PSMA3/PSMB5/PSMB8
BP	GO:0032465	regulation of cytokinesis	88	-0.565301	-2.03793	4.61457e-07	6.80334e-06	4.06468e-06	1114	tags=36%, list=6%, signal=34%	RAB11A/PDXP/PKN2/NUP62/AHCTF1/PKP4/RAB11FIP4/GIPC1/PRPF40A/BCL2L1/GIT1/CENPV/BRCA2/CIT/MYO19/KIF20B/E2F7/KIF14/CHMP4C/INCENP/CDC25B/E2F8/PLK4/KIF20A/KIF23/RACGAP1/PRC1/CDC6/AURKB/ECT2/PLK1/AURKA
BP	GO:0032943	mononuclear cell proliferation	278	0.522745	1.67894	4.632e-07	6.81662e-06	4.07261e-06	3332	tags=38%, list=17%, signal=32%	CCL19/CD79A/LRRC32/CR2/MS4A1/IGF2/MEF2C/GPR183/GPNMB/MSN/VCAM1/FGF10/IL6ST/TGFBR2/GAPT/CD22/PRNP/PTPRC/SASH3/IL7R/HLA-DPB1/LEF1/TYROBP/BLK/IGF1/AIF1/NCKAP1L/FYN/TWSG1/MZB1/TLR4/HLA-DPA1/BCL2/PIK3CG/PLCL2/CD19/BTK/CD4/SPN/VSIG4/RASAL3/DOCK8/BST1/DOCK2/MNDA/TNFSF8/BCL6/CARD11/CD3E/IRS2/TNFRSF13C/CD1D/MAPK8IP1/JAK3/STAT5B/PLA2G2D/CORO1A/LMO1/CD180/TAC1/LST1/TNFSF13B/CD28/CD40LG/EBI3/FCRL3/CD40/CLC/C…
BP	GO:0022407	regulation of cell-cell adhesion	414	0.482974	1.57687	4.64332e-07	6.82087e-06	4.07516e-06	3195	tags=35%, list=16%, signal=30%	CCL19/CCL21/SELP/FGL2/CXCL12/LRRC32/CAV1/SERPINE2/IGF2/GPNMB/CCL2/ITPKB/DTX1/CCR7/THY1/PRKG1/MYADM/VCAM1/NR4A3/GLI3/ZBTB16/EPHA7/IL6ST/CXCL13/TGFB1/C1QTNF1/LGALS1/TGFBR2/RDX/EGR3/PRNP/PTPRC/CD27/GLI2/ADAM19/PDPN/ETS1/CITED2/FSTL3/SASH3/IL7R/HLA-DPB1/BMP6/LEF1/LAPTM5/ZDHHC2/BLK/IGF1/AIF1/NCKAP1L/RGCC/ST3GAL4/FYN/TWSG1/CX3CL1/SELE/CD5/HLA-DPA1/ALOX5/NOTCH4/CD4/SPN/VSIG4/RASAL3/DOCK8/BCL6/CARD11/CD3…
BP	GO:0072401	signal transduction involved in DNA integrity checkpoint	69	-0.618149	-2.11605	4.79953e-07	7.02485e-06	4.19702e-06	2109	tags=42%, list=11%, signal=38%	CARM1/CNOT10/CASP2/RINT1/TRIAP1/PRMT1/PRPF19/CDK2/E2F4/MUC1/BRCC3/PRKDC/CNOT11/BRCA1/CHEK2/TFDP1/E2F7/CHEK1/CDC25C/E2F8/PCNA/GTSE1/DTL/SFN/E2F1/CDK1/PLK1/CCNB1/AURKA
BP	GO:0072422	signal transduction involved in DNA damage checkpoint	69	-0.618149	-2.11605	4.79953e-07	7.02485e-06	4.19702e-06	2109	tags=42%, list=11%, signal=38%	CARM1/CNOT10/CASP2/RINT1/TRIAP1/PRMT1/PRPF19/CDK2/E2F4/MUC1/BRCC3/PRKDC/CNOT11/BRCA1/CHEK2/TFDP1/E2F7/CHEK1/CDC25C/E2F8/PCNA/GTSE1/DTL/SFN/E2F1/CDK1/PLK1/CCNB1/AURKA
MF	GO:0003729	mRNA binding	279	-0.388033	-1.648	4.94453e-07	7.22401e-06	4.31601e-06	4272	tags=43%, list=22%, signal=34%	RPS3A/RPS13/FUBP3/SNRNP70/PABPC3/AQR/TP53/SLC4A1AP/METTL3/PARK7/LSM1/RNF40/RPL41/ELAVL1/PCBP2/NANOS3/EEFSEC/GEMIN5/SF1/CPSF6/IGF2BP3/IREB2/FMR1/PCBP1/RSL1D1/RPS26/EIF2A/LSM14B/G3BP1/PPP1R8/LARP4B/TRA2B/RPS5/YTHDF2/EIF3A/NUDT21/HNRNPK/RBM15/THOC2/SRSF6/PABPC1L/FUBP1/DHX33/RPL35/RBMX/NUP98/NCBP1/HNRNPM/HNRNPR/NCBP2/KHDRBS1/PIWIL1/SLPI/LARP4/SRSF3/HNRNPU/TACO1/MEX3D/MRPS7/RPL7/DENR/SHMT1/EIF3D/RNPS1…
BP	GO:0007264	small GTPase mediated signal transduction	487	0.466061	1.52449	4.95515e-07	7.22648e-06	4.31749e-06	3778	tags=36%, list=19%, signal=30%	A2M/NGFR/NTN1/RERG/TIMP2/KANK2/ARHGEF25/RRAD/COL3A1/MYOC/SLIT2/RHOJ/HEG1/PDGFRB/ARHGEF26/COL1A2/CDC42EP3/LPAR1/PSD/DLC1/SYDE1/ITPKB/CGNL1/RHOB/F2R/ARHGEF17/FGF10/F2RL3/ROBO1/FGF2/ARHGEF6/MRAS/ARHGAP31/ARHGAP23/RASGRP2/RGL1/DOCK11/RDX/F2RL2/ADRA2A/RRAS/PRKD1/P2RY8/SH2D3C/PDPN/ELMO1/RASIP1/AGTR1/ARHGAP24/CDON/TAGAP/NRP1/P2RY10/ARHGDIB/RAB9B/SHC2/IGF1/AIF1/CHN1/RHOQ/MAPRE2/ABCA1/ARHGAP6/CYTH3/DIRAS3…
CC	GO:0005689	U12-type spliceosomal complex	28	-0.789405	-2.27141	5.06509e-07	7.37353e-06	4.40534e-06	2803	tags=64%, list=14%, signal=55%	SNRNP48/SF3B2/YBX1/SF3B4/SF3B5/SNRPD3/SNRPD2/SNRNP25/SF3B6/LSM7/DHX15/PHF5A/SF3B3/SNRPE/SNRPF/SNRPG/SNRPB/SNRPD1
BP	GO:0019934	cGMP-mediated signaling	26	0.84027	2.05699	5.13725e-07	7.46515e-06	4.46008e-06	2413	tags=54%, list=12%, signal=47%	THBS1/PDE3A/AQP1/NPR1/PRKG1/CD36/PDE2A/EDNRB/NPR2/APOE/PDE9A/HTR2B/NPPC/PDE10A
BP	GO:1903510	mucopolysaccharide metabolic process	113	0.625315	1.8736	5.17285e-07	7.50341e-06	4.48294e-06	2698	tags=37%, list=14%, signal=32%	OGN/PRELP/DCN/LUM/OMD/FMOD/BGN/ITIH5/VCAN/CSPG4/SPOCK2/FGF2/TGFB1/NDNF/CHST3/LYVE1/CSGALNACT2/HGF/CHST15/ST3GAL4/UST/IDS/CHST1/ARSB/DSE/DSEL/CHST7/ST3GAL3/ANGPT1/CSGALNACT1/PIM1/HAS1/CHST11/CHSY3/NDST1/CHST2/XYLT1/ST3GAL2/HAS2/ST3GAL1/CD44/ITIH3
BP	GO:1990542	mitochondrial transmembrane transport	85	-0.569754	-2.06364	5.18341e-07	7.50529e-06	4.48406e-06	3939	tags=53%, list=20%, signal=43%	DNAJC19/MID1IP1/TOMM40L/SLC25A37/CPT2/MCU/MICU2/SLC39A8/OPA1/TOMM20/SLC25A32/TIMM23/SFXN2/TIMM21/MRS2/MCUR1/GRPEL2/SLC25A38/ACACA/ROMO1/SLC25A13/TIMM17B/AFG3L2/TIMM50/TIMM44/SLC25A15/CHCHD4/VDAC1/TIMM17A/DNAJC15/SLC25A33/MRPL18/SFXN1/SLC25A1/SFXN4/LETM1/PNPT1/SLC25A5/GRPEL1/TST/AIFM1/STOML2/SLC25A22/TOMM40/HSPD1
MF	GO:0005261	cation channel activity	311	0.50755	1.63949	5.29941e-07	7.6572e-06	4.57482e-06	4238	tags=29%, list=21%, signal=23%	KCNMB1/KCNMA1/CACNA1H/ABCC9/SLC24A3/AQP1/KCNE4/ANXA6/KCNJ8/CACNA2D1/PKD2/NCS1/CACNA1C/ITPR1/KCNH2/GRIK5/CHRNA3/KCNK3/SCN4B/CALHM2/KCND3/SCN7A/CACNB2/CNR1/KCNS3/PKD1/TRPC1/SNAP25/KCNN3/SCN1B/KCNA3/HVCN1/KCNA5/P2RX1/CACNG4/RASA3/KCNE2/KCNK2/TMEM37/KCNB1/TRPC4/P2RX7/KCND1/ITGAV/SCNN1B/ITPR2/TRPV2/NALCN/RYR2/GRIN2A/PIEZO2/KCNJ5/ORAI2/KCNT2/CACNA2D3/KCNQ4/GPM6A/TRPC6/KCNAB1/ANO1/CACNA2D2/KCNN4/HTR1B/O…
BP	GO:0032204	regulation of telomere maintenance	76	-0.582682	-2.07699	5.30725e-07	7.6572e-06	4.57482e-06	4655	tags=51%, list=24%, signal=39%	ATR/USP7/HDAC8/PPP1R10/PNKP/UPF1/NAF1/MAPKAPK5/SIRT6/EXOSC10/ACD/SRC/PINX1/NBN/XRCC5/SMG5/NABP2/HNRNPU/HNRNPC/HNRNPD/HNRNPA1/PIF1/PARP1/MYC/MAPK15/HNRNPA2B1/CCT4/NAT10/CCT2/TCP1/CCT7/CCT3/CCT8/CCT5/CCT6A/GNL3/DKC1/AURKB/NEK2
BP	GO:0050727	regulation of inflammatory response	312	0.511909	1.65305	5.387e-07	7.75843e-06	4.6353e-06	3268	tags=36%, list=17%, signal=30%	PTGIS/IL33/SERPINF1/FABP4/FOXF1/C3/IL1R1/SYT11/AGT/CCR7/TEK/PTGER3/PDE2A/CALCRL/ISL1/IL6ST/CDH5/CD200/WFDC1/EDNRB/C1QTNF3/SERPINE1/PTPRC/GHRL/ETS1/NUPR1/AGTR1/CNR1/LPL/BCL6B/TREM2/IGF1/OSMR/HGF/TLR10/NLRP1/LRRK2/GPER1/IL16/AOAH/CX3CL1/SELE/MGLL/TLR4/PIK3CG/CMA1/ALOX5/BTK/APOE/CXCL17/RORA/GPSM3/BST1/TLR7/BCL6/FNDC4/PTGER4/STAP1/PTGS2/STAT5B/PLA2G2D/CST7/GPRC5B/TGM2/TAC1/ADCYAP1/GATA3/CD28/CREB3L3/…
BP	GO:2000181	negative regulation of blood vessel morphogenesis	89	0.661195	1.94319	5.51948e-07	7.9351e-06	4.74086e-06	2299	tags=39%, list=12%, signal=35%	THBS4/DCN/SERPINF1/THBS1/EMILIN1/CLDN5/PTN/ADAMTS1/ISM1/THBS2/SULF1/ATP2B4/PTPRM/NPR1/TEK/SPARC/HSPG2/TIE1/KLF2/ECSCR/COL4A2/SERPINE1/STAB1/HOXA5/GHRL/SEMA6A/RGCC/ALOX5/VASH1/SEMA3E/SPINK5/TGFB2/ADAMTS9/CCR2/COL4A3
BP	GO:0007004	telomere maintenance via telomerase	64	-0.613787	-2.10533	5.85477e-07	8.3901e-06	5.01269e-06	4297	tags=56%, list=22%, signal=44%	RPA1/PNKP/RFC1/NAF1/MAPKAPK5/NOP10/EXOSC10/ACD/SRC/PINX1/TELO2/XRCC5/SMG5/WRAP53/HNRNPU/HNRNPC/NHP2/HNRNPA1/PIF1/MAPK15/PTGES3/HSP90AA1/CCT4/NAT10/CCT2/GAR1/TCP1/CCT7/CCT3/CCT8/CCT5/HSP90AB1/CCT6A/DKC1/AURKB/NEK2
BP	GO:0085029	extracellular matrix assembly	44	0.759794	2.04827	5.85669e-07	8.3901e-06	5.01269e-06	1600	tags=52%, list=8%, signal=48%	MYH11/MFAP4/FBLN5/EMILIN1/TNXB/ANTXR1/RAMP2/EFEMP2/LTBP3/COL1A2/PHLDB2/AGT/NTN4/TGFB1/TIE1/GAS6/PHLDB1/THSD4/LOX/RGCC/GPM6B/LAMB2/PXDN
BP	GO:0002040	sprouting angiogenesis	117	0.615012	1.85928	5.89968e-07	8.43675e-06	5.04057e-06	3512	tags=52%, list=18%, signal=43%	GREM1/RSPO3/THBS1/NGFR/SLIT2/AKT3/RAMP2/MEOX2/MMRN2/RHOJ/APLNR/CLEC14A/TEK/RECK/SRPX2/ITGA5/ROBO1/FGF2/VEGFC/KLF2/PPP1R16B/PARVA/EGR3/GHRL/AGTR1/SEMA6A/MAP3K3/ACVRL1/NRP1/LEF1/ALOX5/TBXA2R/KDR/VEGFB/FOXC2/PTGS2/ANGPT1/STARD13/SEMA3E/HDAC5/SEMA5A/FLT4/ADAMTS9/NR4A1/GLUL/ANXA1/GATA2/HDAC9/BMPER/ABL1/PGF/HDAC7/DLL1/HMOX1/S100A1/JAK1/CDH13/EPN2/SRF/FGF1/TJP1
BP	GO:0072006	nephron development	137	0.602171	1.84397	5.91597e-07	8.44513e-06	5.04557e-06	3588	tags=43%, list=18%, signal=35%	GREM1/ACTA2/HEYL/WWTR1/SULF1/PECAM1/PDGFRB/MEF2C/PDGFRA/GPC3/SIX2/AGT/BASP1/PKD2/DCHS1/NID1/TEK/TCF21/CD34/GLI3/FGF2/PDGFD/EGR1/FAT4/PBX1/SMO/COL4A4/WNT2B/PKD1/PTCH1/BCL2/MTSS1/LAMB2/FOXC2/ANGPT1/KLF15/GATA3/NOTCH2/SULF2/IL6R/ADIPOQ/MAGI2/RET/COL4A3/SOX8/NOG/GPR4/OSR1/CFLAR/PLCE1/NPNT/ENPEP/DLL1/ADAMTS16/FGF1/GDNF/KLHL3/LZTS2/PDGFB
CC	GO:0032040	small-subunit processome	34	-0.739825	-2.2093	5.99928e-07	8.54898e-06	5.10762e-06	3990	tags=79%, list=20%, signal=63%	WDR36/UTP3/UTP20/MPHOSPH10/IMP3/UTP6/XRCC5/NGDN/WDR46/HEATR1/RPS7/WDR3/TBL3/PDCD11/NOL10/UTP14A/NOP14/PRKDC/UTP18/DCAF13/NOC4L/IMP4/NOP58/NOL6/NOP56/FBL/RRP9
MF	GO:0016796	exonuclease activity, active with either ribo- or deoxyribonucleic acids and producing 5'-phosphomonoesters	56	-0.632768	-2.11076	6.40653e-07	9.11326e-06	5.44475e-06	4281	tags=59%, list=22%, signal=46%	ANGEL1/CNOT1/ERI3/RAD1/CNOT6/TOE1/DIS3/CNOT7/EXOSC10/XRN2/ERI2/TATDN1/RAD9A/ERI1/PDE12/APEX2/EXOSC3/ISG20L2/APEX1/EXOSC7/APTX/EXOSC9/DCLRE1B/EXOSC2/EXOSC5/POLE/DCLRE1A/PNPT1/MGME1/EXOSC4/POLD1/EXO1/FEN1
BP	GO:0070663	regulation of leukocyte proliferation	233	0.536756	1.71005	6.60092e-07	9.3733e-06	5.60011e-06	3808	tags=44%, list=19%, signal=36%	CCL19/GREM1/IL33/LRRC32/IGF2/MEF2C/GPR183/GPNMB/VCAM1/FGF10/IL6ST/IL34/TGFBR2/CD22/CSF1R/PRNP/PTPRC/SASH3/HLA-DPB1/TYROBP/BLK/IGF1/AIF1/NCKAP1L/TWSG1/MZB1/TLR4/HLA-DPA1/BCL2/BTK/CD4/SPN/VSIG4/RASAL3/BST1/MNDA/TNFSF8/BCL6/CARD11/CD3E/IRS2/TNFRSF13C/CD1D/MAPK8IP1/JAK3/STAT5B/PLA2G2D/CORO1A/LMO1/TAC1/LST1/TNFSF13B/CD28/CD40LG/EBI3/FCRL3/CD40/CLC/CD74/IKZF3/CD6/TNFRSF13B/CCR2/CD209/ANXA1/FCGR2B/CSF1/…
CC	GO:0005746	mitochondrial respirasome	74	-0.597589	-2.11451	6.71812e-07	9.50877e-06	5.68105e-06	3857	tags=64%, list=20%, signal=51%	NDUFB10/NDUFA7/OXA1L/UQCRC2/NDUFB11/NDUFS5/NDUFS1/UQCRQ/NDUFS8/COX7B/NDUFS7/SDHD/NDUFB2/NDUFB6/COX7A2L/NDUFC1/NDUFA12/NDUFB4/COX4I1/NDUFA10/COX15/NDUFA1/NDUFA9/SDHB/NDUFA8/NDUFAB1/NDUFA6/BCS1L/UQCR10/NDUFS3/NDUFB9/NDUFS2/NDUFB3/UQCRHL/UQCC3/COX7A2/NDUFV1/FOXRED1/NDUFS6/UQCRFS1/COX6A1/UQCRH/SDHA/COX5A/UQCRC1/C15orf48/CYC1
BP	GO:0006282	regulation of DNA repair	112	-0.51101	-1.9372	6.71981e-07	9.50877e-06	5.68105e-06	4122	tags=46%, list=21%, signal=36%	PNKP/PARP9/SIRT7/RPA2/RIF1/SIRT6/OTUB2/UBE2V2/NPAS2/MAD2L2/UBE2N/DTX3L/AXIN2/CEBPG/HMGA2/MAGEF1/WRAP53/SPIRE2/PPP4R2/FANCB/OTUB1/PPP4C/HSF1/TMEM161A/DHX9/CUL4A/KDM1A/RPS3/PARP1/CBX8/WRNIP1/HMGB1/DDX11/DEK/BRCC3/PRKDC/UBQLN4/USP1/TRIM28/FIGNL1/BRCA1/RMI2/PARPBP/POLQ/CHEK1/AUNIP/RAD51/TIMELESS/PCNA/RAD51AP1/FOXM1
BP	GO:0050731	positive regulation of peptidyl-tyrosine phosphorylation	188	0.558442	1.75755	6.76487e-07	9.55582e-06	5.70916e-06	3684	tags=40%, list=19%, signal=33%	THBS4/GREM1/FGF7/PECAM1/KIT/IGF2/ENPP2/CSPG4/AGT/CNTN1/CD36/CTF1/ITGA5/FGF10/ISL1/IL6ST/IL34/TGFB1/GHR/CRLF1/CSF1R/PRNP/ADRA2A/GAS6/PTPRC/GHRL/HCLS1/VTN/BANK1/NRP1/BMP6/DLG4/TREM2/IGF1/HGF/FYN/ITGB3/CD4/NEDD9/CD3E/STAP1/EPHA4/ANGPT1/GPRC5B/HTR2A/IL6R/ADIPOQ/EFNA5/IL24/CD40/CD74/ACVR1/NOX4/CCL5/NTRK2/NCF1/CD44/AFAP1L2/ARL2BP/CD81/CLEC7A/ABL1/SOCS3/TAL1/KITLG/DOCK3/TNFSF18/FLT3/CLCF1/BTC/TSLP/LRRK1…
BP	GO:0009124	nucleoside monophosphate biosynthetic process	40	-0.705589	-2.17428	6.85059e-07	9.66004e-06	5.77143e-06	2997	tags=62%, list=15%, signal=53%	DGUOK/ADK/CMPK1/ADSL/DUT/NUDT2/PRPS2/PFAS/UCKL1/APRT/DCK/GART/UMPS/IMPDH2/IMPDH1/CAD/GMPS/HPRT1/UCK2/ENTPD8/ATIC/PPAT/PAICS/TYMS/TK1
CC	GO:0005732	sno(s)RNA-containing ribonucleoprotein complex	23	-0.799934	-2.20467	6.92927e-07	9.754e-06	5.82756e-06	3737	tags=91%, list=19%, signal=74%	NAF1/NOP10/POP5/MPHOSPH10/SNRNP40/POP4/LSM6/NHP2/RPP40/POP1/NOP58/RPP25L/SNRPF/NOP56/GAR1/FBL/POP7/RPP25/NOLC1/RRP9/DKC1
BP	GO:0006278	RNA-dependent DNA biosynthetic process	66	-0.612109	-2.08243	7.19756e-07	1.01141e-05	6.04269e-06	4297	tags=56%, list=22%, signal=44%	RPA1/PNKP/RFC1/NAF1/MAPKAPK5/NOP10/EXOSC10/ACD/SRC/PINX1/TELO2/XRCC5/SMG5/WRAP53/HNRNPU/HNRNPC/NHP2/HNRNPA1/PIF1/MAPK15/PTGES3/HSP90AA1/PPIA/CCT4/NAT10/CCT2/GAR1/TCP1/CCT7/CCT3/CCT8/CCT5/HSP90AB1/CCT6A/DKC1/AURKB/NEK2
BP	GO:0006022	aminoglycan metabolic process	170	0.576662	1.80459	7.24252e-07	1.01596e-05	6.0699e-06	4006	tags=42%, list=20%, signal=34%	OGN/PRELP/DCN/LUM/OMD/FMOD/BGN/ITIH5/VCAN/PDGFRB/GPC3/SDC2/CSPG4/GPC6/SPOCK2/FGF2/HSPG2/TGFB1/NDNF/CHST3/LYVE1/CSGALNACT2/HGF/CHST15/ST3GAL4/SDC3/UST/IDS/CHST1/ARSB/DSE/DSEL/CHST7/ST3GAL3/ANGPT1/CHI3L2/HS3ST2/CSGALNACT1/PIM1/HAS1/CHST11/B3GNT9/CHSY3/NDST1/CHST2/XYLT1/HPSE2/ST3GAL2/HAS2/ST3GAL1/HGSNAT/CD44/ITIH3/HS3ST3A1/KERA/CHST14/B3GNT6/B3GNT8/B3GALT5/IDUA/HS3ST3B1/ST3GAL6/ABCC5/PDGFB/EGFLAM/GC…
BP	GO:0030203	glycosaminoglycan metabolic process	156	0.585631	1.81596	7.32281e-07	1.02545e-05	6.12657e-06	2698	tags=33%, list=14%, signal=28%	OGN/PRELP/DCN/LUM/OMD/FMOD/BGN/ITIH5/VCAN/PDGFRB/GPC3/SDC2/CSPG4/GPC6/SPOCK2/FGF2/HSPG2/TGFB1/NDNF/CHST3/LYVE1/CSGALNACT2/HGF/CHST15/ST3GAL4/SDC3/UST/IDS/CHST1/ARSB/DSE/DSEL/CHST7/ST3GAL3/ANGPT1/HS3ST2/CSGALNACT1/PIM1/HAS1/CHST11/CHSY3/NDST1/CHST2/XYLT1/HPSE2/ST3GAL2/HAS2/ST3GAL1/HGSNAT/CD44/ITIH3
BP	GO:1902036	regulation of hematopoietic stem cell differentiation	74	-0.5962	-2.1096	7.49541e-07	1.0478e-05	6.26014e-06	4033	tags=69%, list=20%, signal=55%	PSME4/METTL3/OSM/PSMD4/FOXC1/PSMD6/OCIAD1/PSMD10/PSMD7/PSMF1/PSMC1/PSMB6/PSMD1/OCIAD2/PSMA6/YTHDF2/PSMD8/PSMD5/PSMC3/PSMB10/TP73/PSME1/CBFB/PSMD12/PSMC6/PSMB9/PSMC2/PSMB2/PSMB4/PSMD13/PSMB1/PSMA7/PSMD11/PSMC4/PSME3/PSMB7/PSMB3/PSMA4/PSMA5/PSMA3/PSMB5/PSMD2/PRKDC/PSMB8/PSMD14/TCF3/HSPA9/PSMD3/PSME2/PUS7/MYB
MF	GO:0017046	peptide hormone binding	49	0.737566	2.00083	7.68176e-07	1.072e-05	6.40472e-06	3760	tags=53%, list=19%, signal=43%	RAMP2/RAMP1/NPR1/CALCRL/GHR/LEPR/EDNRB/NPR2/INHBA/VIPR2/AVPR1A/GLP2R/PIK3R1/EBI3/NPR3/PTH1R/CCKAR/ACVR1/IGF1R/ECE1/SCTR/INSR/CCKBR/ADCYAP1R1/SLC40A1/OXTR
CC	GO:0031093	platelet alpha granule lumen	65	0.693338	1.97107	7.73367e-07	1.07739e-05	6.4369e-06	1789	tags=42%, list=9%, signal=38%	ISLR/A2M/CLU/THBS1/SERPING1/F13A1/FN1/MMRN1/IGF2/TGFB3/VWF/SPARC/CFD/TIMP1/VEGFC/PROS1/TGFB1/SERPINE1/GAS6/SRGN/IGF1/HGF/ACTN1/F8/VEGFB/ACTN2/TGFB2
BP	GO:0030183	B cell differentiation	134	0.605338	1.85544	7.89148e-07	1.09749e-05	6.55697e-06	3400	tags=41%, list=17%, signal=34%	SFRP1/CD79A/KIT/ITM2A/CR2/MS4A1/GPR183/CD79B/VCAM1/LGALS1/DOCK11/PTPRC/CD27/LYL1/INHBA/MFNG/NCKAP1L/BCL2/POU2AF1/PLCL2/CD19/BTK/DOCK10/BCL6/CARD11/ITGA4/JAK3/STAT5B/NOTCH2/HDAC5/PLCG2/CD40LG/NKX2-3/ZFP36L1/PIK3R1/FCRL3/IKZF3/FCGR2B/ITGB1/HDAC9/MMP14/CR1/BLNK/ST3GAL1/INPP5D/ATM/KLF6/ABL1/SLAMF8/DLL1/NFAM1/FLT3/CLCF1/HDAC4/HHEX
BP	GO:0006369	termination of RNA polymerase II transcription	35	-0.735542	-2.23067	8.14873e-07	1.13132e-05	6.75909e-06	3968	tags=77%, list=20%, signal=62%	CPSF2/MED18/SSU72/CPSF7/SCAF4/PABPN1/PAPOLA/ZNF473/CLP1/NUDT21/FIP1L1/NCBP1/NCBP2/CSTF1/CSTF3/SNRPD3/CPSF4/CPSF3/MAZ/TTF2/CPSF1/SNRPE/SNRPF/SNRPG/CSTF2/SLBP/SNRPB
BP	GO:0060560	developmental growth involved in morphogenesis	220	0.540152	1.71749	8.45946e-07	1.17245e-05	7.00482e-06	2484	tags=29%, list=13%, signal=25%	SFRP2/SFRP1/NDN/MAP1B/SLIT3/CXCL12/NTN1/TNC/S1PR1/SLIT2/CCL11/FN1/NRP2/CXCR4/PTPRS/FGF10/EPHA7/SEMA3G/LRP1/TGFBR2/SEMA3C/POSTN/PLXNA4/L1CAM/VCL/SEMA6A/DCLK1/OLFM1/NRP1/CRABP2/TNN/MACF1/SEMA6B/DPYSL2/REG1A/APOE/LAMB2/SPRY1/ITGA4/SEMA6D/SEMA6C/ISLR2/TBX2/SEMA3E/BMPR2/AUTS2/CPNE5/SEMA5A/MAP2/NLGN3/MAGI2/ULK2/DBN1/TIAM1/SEMA3A/WASF1/CSF1/NGF/SEMA4C/NIN/TRPV2/RTN4/PPP3CB
MF	GO:0008173	RNA methyltransferase activity	60	-0.61548	-2.07232	8.48948e-07	1.1746e-05	7.01766e-06	5800	tags=78%, list=29%, signal=55%	TRMT2B/CMTR1/TRMT44/CMTR2/TRMT1L/DIMT1/TYW3/PCIF1/FDXACB1/RNMT/NSUN4/EMG1/TRMT13/NSUN6/TRMT61B/HENMT1/ZCCHC4/METTL2B/TRMT5/METTL15/METTL3/FTSJ3/MEPCE/METTL1/THUMPD2/TARBP1/TRMT10A/TRMT112/THUMPD3/METTL2A/TRMT61A/TRMT2A/TFB1M/METTL5/FTSJ1/TRMT6/MRM1/TRMT11/NSUN5/WDR4/TGS1/TRMT1/TFB2M/TRMT10C/NSUN2/FBL/NOP2
BP	GO:0046939	nucleotide phosphorylation	128	-0.471334	-1.84184	8.58652e-07	1.186e-05	7.08577e-06	3629	tags=41%, list=18%, signal=33%	ADPGK/NUP133/NME2/PFKL/AK7/NME6/NUP153/PGAM1/POM121/CMPK1/NUP93/NUP62/NUP98/SEC13/POM121C/NUP88/NUP160/NUP54/FOXK2/NUP107/NUP43/AAAS/PFKFB4/HKDC1/GALK1/ALDOC/PFKP/NUP155/EIF6/NUP85/NUP35/SEH1L/MLXIPL/GIT1/NUP50/PFKFB2/RAE1/ALDOA/NUP188/NUP205/NUP37/LDHA/GPI/TPI1/PGK1/ENO1/GAPDH/DTYMK/PKM/NME1/NDC1/HK2
BP	GO:0006023	aminoglycan biosynthetic process	114	0.614444	1.8469	9.18066e-07	1.2659e-05	7.56316e-06	4006	tags=47%, list=20%, signal=38%	OGN/PRELP/DCN/LUM/OMD/FMOD/BGN/VCAN/PDGFRB/GPC3/SDC2/CSPG4/GPC6/HSPG2/TGFB1/CHST3/CSGALNACT2/CHST15/ST3GAL4/SDC3/UST/CHST1/DSE/DSEL/CHST7/ST3GAL3/ANGPT1/HS3ST2/CSGALNACT1/HAS1/CHST11/B3GNT9/CHSY3/NDST1/CHST2/XYLT1/ST3GAL2/HAS2/ST3GAL1/HS3ST3A1/KERA/CHST14/B3GNT6/B3GNT8/B3GALT5/HS3ST3B1/ST3GAL6/ABCC5/PDGFB/GCNT2/CHSY1/CHST12/B3GALNT1/GPC4
BP	GO:0048565	digestive tract development	122	0.614552	1.86629	9.20461e-07	1.26704e-05	7.57e-06	2656	tags=37%, list=13%, signal=32%	SFRP2/SFRP1/RBPMS2/FOXF1/CLMP/MYOCD/FOXF2/KIT/DACT1/RARRES2/PDGFRA/SIX2/TGFB3/DCHS1/TCF21/GLI1/FGF10/GLI3/IL6ST/FAT4/TGFBR2/EDNRB/SOX17/SMO/GLI2/HOXA5/NKX3-2/PKD1/PDGFC/RARB/BCL2/REG1A/PKDCC/TBX2/TGFB2/NKX2-3/CLDN18/SFRP5/NPY/RET/EGFR/CPS1/OTC/SCT/HLX
BP	GO:0048041	focal adhesion assembly	85	0.662174	1.93607	9.27272e-07	1.27425e-05	7.61306e-06	1995	tags=36%, list=10%, signal=33%	APOD/GREM1/SFRP1/SORBS1/THBS1/FERMT2/MYOC/FAM107A/EPHA3/PHLDB2/DLC1/THY1/TEK/COL16A1/LRP1/VCL/ACVRL1/NRP1/GPM6B/ACTN1/MACF1/ARHGAP6/BCL2/KDR/CORO2B/ACTN2/THSD1/LIMCH1/PEAK1/DUSP3/EFNA5
BP	GO:0072073	kidney epithelium development	131	0.594709	1.81577	9.32482e-07	1.27766e-05	7.6334e-06	2541	tags=33%, list=13%, signal=29%	GREM1/SFRP1/KANK2/HEYL/WWTR1/SLIT2/PECAM1/MEF2C/GPC3/SIX2/AGT/BASP1/PKD2/DCHS1/TCF21/CD34/GLI3/FGF2/EPHA7/FAT4/PBX1/CRLF1/SMO/WNT2B/PKD1/RARB/PTCH1/BCL2/MTSS1/LAMB2/SPRY1/FOXC2/EPHA4/KLF15/GATA3/NOTCH2/ADIPOQ/MAGI2/RET/SMAD7/SOX8/BMPER/NOG
BP	GO:0043271	negative regulation of ion transport	282	0.513361	1.64714	9.32906e-07	1.27766e-05	7.6334e-06	3291	tags=31%, list=17%, signal=26%	APOD/PLN/SFRP4/SFRP1/THBS1/CASQ2/GEM/GNAO1/CAV1/RRAD/ATP1A2/VIP/KCNE4/SYT11/MAOB/RGS2/SERPINE2/PKIG/PRKCB/MDFIC/PKD2/CLIC2/CD36/F2R/KCNH2/CARTPT/RAB23/CD200/RGS4/CHGA/PID1/REM1/SPINK1/ADRA2A/KLF7/PKIA/GHRL/CNR1/PLA2G10/LRRK2/GPM6B/TWIST1/ITGB3/BCL2/APOE/PEA15/IRS2/STC1/KCNE2/ANGPT1/IRS1/ACTN2/PKDCC/ADCYAP1/KCNB1/HTR2A/ADIPOQ/GSTM2/FRMD4A/CD74/ITGAV/DERL3/ANXA1/SNCA/PLA2R1/RSAD2/APOC1/ISCU/PPM1F/B…
BP	GO:0010466	negative regulation of peptidase activity	237	0.53363	1.70499	9.44665e-07	1.29157e-05	7.71656e-06	2360	tags=24%, list=12%, signal=21%	SFRP2/CRYAB/A2M/PI16/SERPINF1/THBS1/NGFR/SERPING1/CST2/SPOCK1/TIMP2/C3/TIMP3/AQP1/ITIH5/PCSK1N/PAPLN/LTF/SERPINE2/GPC3/COL6A3/C4A/AGT/C4B/RECK/SPOCK2/TIMP1/PROS1/LRP1/WFDC1/SPINK1/SERPINE1/LXN/PRNP/GAS6/CD27/CD109/VTN/ECM1/HGF/SPINK4/IFI16/TFPI2/TFPI/CST7/CSTA/PI15/SPINK5/CRIM1/RARRES1/CST6/TNFAIP8/SNCA/NGF/COL4A3/TIMP4
BP	GO:0051897	positive regulation of protein kinase B signaling	162	0.574681	1.78561	9.6225e-07	1.3134e-05	7.84694e-06	3807	tags=46%, list=19%, signal=38%	CCL19/CCL21/IGFBP5/FGF7/THBS1/FERMT2/MYOC/FGFR1/KIT/AXL/RAMP3/IGF2/PDGFRB/PDGFRA/TSPYL5/CCR7/TEK/TNFAIP8L3/FGF10/FGF2/TGFB1/C1QTNF1/ENG/RASD2/GAS6/HCLS1/CX3CR1/HGF/FYN/CX3CL1/PIK3CG/CD19/PIK3CD/IRS2/ANGPT1/GAB1/IRS1/TGFBR1/GATA3/CD28/KL/SEMA5A/PIK3R1/PIK3R5/FGF18/RET/VAV1/HIP1/F10/PINK1/ITGB1/EGFR/TRAT1/RTN4/AKR1C2/CD86/P2RY12/IGF1R/RAC2/F3/LCK/KITLG/TNFSF11/INSR/PDGFA/BTC/FGF1/NRG2/PDGFB/CASS4/F…
BP	GO:0051896	regulation of protein kinase B signaling	217	0.546547	1.73514	9.73912e-07	1.32708e-05	7.92867e-06	3807	tags=41%, list=19%, signal=34%	CCL19/CCL21/IGFBP5/FGF7/THBS1/FERMT2/MYOC/FGFR1/SESN3/KIT/AXL/RAMP3/IGF2/PDGFRB/PDGFRA/TSPYL5/CCR7/TEK/TNFAIP8L3/FGF10/FGF2/TGFB1/PHLDA3/C1QTNF1/ENG/RASD2/GAS6/RRAS/HCLS1/BANK1/CX3CR1/HGF/RCN3/GPER1/FYN/CX3CL1/PIK3CG/CD19/PIK3CD/IRS2/ANGPT1/GAB1/IRS1/TGFBR1/GATA3/CD28/KL/SEMA5A/PIK3R1/SFRP5/MAGI2/PIK3R5/FGF18/RET/VAV1/HIP1/F10/PINK1/SH2B3/ITGB1/EGFR/TRAT1/RTN4/NTRK2/AKR1C2/CD86/P2RY12/IGF1R/RAC2/…
BP	GO:0061337	cardiac conduction	144	0.586704	1.81116	9.80213e-07	1.33342e-05	7.96656e-06	2328	tags=31%, list=12%, signal=28%	PLN/FLNA/CASQ2/FXYD6/CAV1/ABCC9/ATP1A2/KCNE4/ATP2B4/DMPK/CACNA2D1/AGT/NPR1/ANK2/ATP1B2/GJA1/CACNA1C/ITPR1/ISL1/KCNH2/KCNK3/SCN4B/KCND3/EHD3/GJC1/NPR2/CACNB2/TRPC1/FXYD1/MEF2A/GJA5/ATP2A3/SCN1B/KCNA5/SLC8A1/CACNG4/KCNE2/KCND1/PDE4D/NPPC/CASQ1/SLC8A2/SLC4A3/CTNNA3/ITPR2
BP	GO:0031577	spindle checkpoint	38	-0.707839	-2.17594	9.86728e-07	1.33974e-05	8.00434e-06	1497	tags=50%, list=8%, signal=46%	ZW10/GEN1/SPDL1/KNTC1/MAD2L1BP/BUB3/NDC80/TTK/BUB1B/TRIP13/CENPF/ZWINT/AURKB/BUB1/PLK1/MAD2L1/CCNB1/CDT1/CDC20
BP	GO:0075733	intracellular transport of virus	55	-0.641362	-2.12103	9.88171e-07	1.33974e-05	8.00434e-06	3570	tags=73%, list=18%, signal=60%	VPS28/RANBP2/RPS27A/DYNLT1/MVB12A/TPR/BST2/NUP214/VPS37B/KPNA3/NUP133/FMR1/NUP153/POM121/NUP93/NUP62/NUP98/SEC13/POM121C/NUP88/NUP160/NUP54/NUP107/NUP43/AAAS/KPNB1/NUP155/NUP85/XPO1/NUP35/SEH1L/NUP50/RAE1/NUP188/NUP205/NUP37/RAN/NDC1/TRIM15/KPNA2
BP	GO:0014068	positive regulation of phosphatidylinositol 3-kinase signaling	88	0.653868	1.92015	9.94159e-07	1.34561e-05	8.03937e-06	3297	tags=48%, list=17%, signal=40%	DCN/SELP/MYOC/ROR2/FGFR1/KIT/FN1/PDGFRB/PDGFRA/AGT/TEK/F2R/FGF2/PDGFD/HCST/HCLS1/ROR1/PDGFC/IGF1/HGF/GPER1/FYN/PIK3CG/PIK3CD/KDR/IRS2/ANGPT1/GAB1/TGFB2/CD28/PIK3R1/PIK3R5/FGR/CCL5/NTRK2/NCF1/FLT1/IGF1R/INSR/FLT3/NEDD4/PDGFA
BP	GO:1901532	regulation of hematopoietic progenitor cell differentiation	89	-0.55497	-1.99018	9.96707e-07	1.3468e-05	8.04652e-06	4033	tags=58%, list=20%, signal=47%	METTL3/OSM/PSMD4/FOXC1/PSMD6/OCIAD1/PSMD10/PSMD7/PSMF1/PSMC1/PSMB6/PSMD1/OCIAD2/PSMA6/YTHDF2/NUDT21/PSMD8/PSMD5/PSMC3/PSMB10/TP73/PSME1/PDCD2/CBFB/PSMD12/PSMC6/PSMB9/PSMC2/PSMB2/PSMB4/PSMD13/PSMB1/PSMA7/PSMD11/PSMC4/PSME3/PSMB7/PSMB3/PSMA4/PSMA5/PSMA3/PSMB5/PSMD2/PRKDC/PSMB8/PSMD14/TCF3/HSPA9/PSMD3/PSME2/PUS7/MYB
BP	GO:0002687	positive regulation of leukocyte migration	130	0.600434	1.83243	1.00249e-06	1.35236e-05	8.07973e-06	3007	tags=42%, list=15%, signal=36%	THBS4/CCL19/CCL21/SELP/THBS1/JAM2/PTN/CXCL12/JAM3/IL1R1/RARRES2/CCR7/THY1/CXCL14/VEGFC/PDGFD/CXCL13/IL34/CSF1R/SERPINE1/CAMK1D/GAS6/EDN1/PLVAP/TREM2/CX3CR1/AIF1/NCKAP1L/CD99L2/C3AR1/MADCAM1/C5AR1/CX3CL1/SPN/CXCL17/GPSM3/DOCK8/VEGFB/ITGA4/SWAP70/CMKLR1/PTAFR/IL6R/BDKRB1/CD74/CCR2/CSF1/CCL5/MMP14/P2RY12/RAC2/PGF/PLA2G7/CCR1/KITLG
BP	GO:0060627	regulation of vesicle-mediated transport	488	0.4582	1.49895	1.08252e-06	1.45617e-05	8.69992e-06	3842	tags=32%, list=19%, signal=27%	CCL19/SFRP4/GREM1/CCL21/CLIP3/CLU/FOXF1/CACNA1H/GAS1/CAV1/C3/EHD2/STON1/EPHA3/SYT11/AXL/RAB31/PRKCB/GPC3/CCL2/C4A/C4B/NCS1/BVES/CD36/MSN/DAB2/LRP1/GRIK5/MFGE8/RDX/CD22/SERPINE1/CAMK1D/ADRA2A/GAS6/PTPRC/PRKD1/CACNB2/VTN/CNR1/NRP1/DLG4/TREM2/ZDHHC2/BLK/NCKAP1L/BACE1/LRRK2/VAMP2/SELE/ITGAM/DYSF/PLA2G5/ITGB3/P2RX1/APOE/RIN3/CD84/RSPO1/DOCK2/TUB/STAP1/ANGPT1/CORO1A/SMPD1/ACTN2/PKDCC/SGIP1/IL2RG/RAB12/…
BP	GO:0006024	glycosaminoglycan biosynthetic process	107	0.621368	1.85378	1.08304e-06	1.45617e-05	8.69992e-06	2610	tags=36%, list=13%, signal=31%	OGN/PRELP/DCN/LUM/OMD/FMOD/BGN/VCAN/PDGFRB/GPC3/SDC2/CSPG4/GPC6/HSPG2/TGFB1/CHST3/CSGALNACT2/CHST15/ST3GAL4/SDC3/UST/CHST1/DSE/DSEL/CHST7/ST3GAL3/ANGPT1/HS3ST2/CSGALNACT1/HAS1/CHST11/CHSY3/NDST1/CHST2/XYLT1/ST3GAL2/HAS2/ST3GAL1
BP	GO:0016049	cell growth	445	0.477502	1.56077	1.11604e-06	1.49804e-05	8.9501e-06	2740	tags=25%, list=14%, signal=22%	SFRP2/FHL1/GREM1/SFRP1/CRYAB/FRZB/IGFBP5/PI16/NDN/IGFBP4/MAP1B/DACT3/IGFBP7/SLIT3/SPOCK1/CXCL12/MYOCD/NTN1/RERG/SLIT2/FAM107A/RGS2/FN1/SERPINE2/NRP2/APBB1/AGT/CXCR4/LTBP4/PTCH2/NPR1/PTPRS/GJA1/EPHA7/TGFB1/SEMA3G/LRP1/WFDC1/RGS4/TGFBR2/RASGRP2/SEMA3C/SORBS2/POSTN/SOX17/EDN1/PLXNA4/L1CAM/VCL/AGTR1/SEMA6A/DCLK1/OLFM1/IGFBP3/ACVRL1/NRP1/INHBA/CRABP2/IGF1/TSPYL2/TNN/MACF1/SEMA6B/CLSTN3/DPYSL2/AKAP6/AV…
BP	GO:0000076	DNA replication checkpoint	17	-0.860702	-2.21735	1.12247e-06	1.50419e-05	8.98683e-06	1489	tags=65%, list=8%, signal=60%	NAE1/TIPIN/TOPBP1/DNA2/CLSPN/TICRR/TIMELESS/ORC1/CDC45/CDC6/CDT1
CC	GO:0000778	condensed nuclear chromosome kinetochore	17	-0.860643	-2.2172	1.13435e-06	1.51759e-05	9.06692e-06	980	tags=59%, list=5%, signal=56%	CENPK/CENPO/DSN1/NDC80/NUF2/BUB1B/CENPA/BUB1/PLK1/CCNB1
CC	GO:0030027	lamellipodium	190	0.550852	1.73605	1.1906e-06	1.58647e-05	9.47843e-06	3546	tags=40%, list=18%, signal=33%	ACTG2/MYLK/ACTA2/DPYSL3/FERMT2/PALLD/ANTXR1/PDLIM4/GSN/PTPRM/APBB1/CSPG4/PKD2/ACTC1/MCC/ARHGEF6/ARHGAP31/MYH10/STMN2/PARVA/RDX/EVL/FGD5/SORBS2/FAP/PDPN/ABLIM3/PTPN13/WASF3/AIF1/PLEKHH2/APBB1IP/ILK/ITGB3/NEDD9/DOCK8/CORO1A/SWAP70/FGD1/ABI3/ENAH/DBN1/CCDC88A/STX2/FGD2/ITGAV/PLXND1/WASF1/CDH2/ITGB1/CTNNA3/FGD3/UNC5C/FGD6/MYO1G/CD44/RAC2/CDC42BPA/FSCN1/PSTPIP1/KITLG/DUSP22/PLCE1/PPP1R9A/RAPGEF3/SSH1/…
BP	GO:0007094	mitotic spindle assembly checkpoint	37	-0.720384	-2.18223	1.19368e-06	1.58647e-05	9.47843e-06	1497	tags=51%, list=8%, signal=48%	ZW10/GEN1/SPDL1/KNTC1/MAD2L1BP/BUB3/NDC80/TTK/BUB1B/TRIP13/CENPF/ZWINT/AURKB/BUB1/PLK1/MAD2L1/CCNB1/CDT1/CDC20
BP	GO:0071173	spindle assembly checkpoint	37	-0.720384	-2.18223	1.19368e-06	1.58647e-05	9.47843e-06	1497	tags=51%, list=8%, signal=48%	ZW10/GEN1/SPDL1/KNTC1/MAD2L1BP/BUB3/NDC80/TTK/BUB1B/TRIP13/CENPF/ZWINT/AURKB/BUB1/PLK1/MAD2L1/CCNB1/CDT1/CDC20
BP	GO:0071174	mitotic spindle checkpoint	37	-0.720384	-2.18223	1.19368e-06	1.58647e-05	9.47843e-06	1497	tags=51%, list=8%, signal=48%	ZW10/GEN1/SPDL1/KNTC1/MAD2L1BP/BUB3/NDC80/TTK/BUB1B/TRIP13/CENPF/ZWINT/AURKB/BUB1/PLK1/MAD2L1/CCNB1/CDT1/CDC20
BP	GO:0045123	cellular extravasation	67	0.698087	1.98596	1.22205e-06	1.62151e-05	9.68779e-06	2262	tags=48%, list=11%, signal=42%	CCL21/SELP/JAM2/CXCL12/JAM3/IL1R1/PECAM1/CCL2/SELL/ITGA1/THY1/VCAM1/PDGFD/PLVAP/CX3CR1/CD99L2/ST3GAL4/MADCAM1/CX3CL1/SELE/ITGAL/PIK3CG/SPN/PIK3CD/BST1/SELPLG/PTGER4/ITGA4/ITGB2/PTAFR/CCR2/ITGB1
BP	GO:0044743	protein transmembrane import into intracellular organelle	35	-0.730056	-2.21403	1.24208e-06	1.6454e-05	9.83047e-06	3946	tags=69%, list=20%, signal=55%	PEX2/DNAJC19/TOMM40L/PEX10/PEX5/PEX1/PEX16/TOMM20/PEX14/TIMM23/TIMM21/GRPEL2/ROMO1/TIMM17B/TIMM50/TIMM44/CHCHD4/PEX7/TIMM17A/DNAJC15/GRPEL1/AIFM1/TOMM40/HSPD1
BP	GO:0032984	protein-containing complex disassembly	313	-0.363302	-1.57437	1.24477e-06	1.64628e-05	9.83573e-06	4004	tags=43%, list=20%, signal=35%	MRPL55/SH3GL1/UPF1/MAP6D1/GSK3B/SPAST/MRPL42/MID1IP1/MRPL28/MRPL20/OXA1L/CHCHD1/GRWD1/SCAF4/MRPL40/UBQLN1/HSPA8/GFM2/MRPS31/MRPS24/GADD45GIP1/VAMP8/MRPS27/TRMT112/MRPL27/MRPS18C/CIB1/PDXP/CHMP5/AXIN1/CHMP2B/PEX14/KATNB1/SMARCD1/MRPL51/MRPL35/MRPL22/KIF2A/CFL1/DAP3/MRPL32/MRPL24/CHMP1A/MRPL57/MRPS16/MRPS25/CTNNB1/GAK/NFE2/MRPS33/NSF/MRRF/MRPL1/MRPS7/F2RL1/MRPS23/SUPT16H/CAPZA1/VCP/VTA1/SMARCB1/CCS…
MF	GO:0003777	microtubule motor activity	68	-0.603486	-2.07133	1.26336e-06	1.66813e-05	9.96629e-06	606	tags=22%, list=3%, signal=21%	KIFC2/KIF24/KIF20B/KIF14/KIF22/CENPE/KIF18A/KIF20A/KIF15/KIF23/KIF11/KIF18B/KIFC1/KIF4A/KIF2C
MF	GO:0004527	exonuclease activity	77	-0.577216	-2.05886	1.28173e-06	1.68702e-05	1.00792e-05	4281	tags=57%, list=22%, signal=45%	ANGEL1/CNOT1/ERI3/RAD1/CNOT6/DCPS/TOE1/WRN/DIS3/CNOT7/EXOSC10/XRN2/ERI2/TATDN1/REXO1/RAD9A/ERI1/PDE12/APEX2/DXO/EXOSC3/TDP1/ISG20L2/APEX1/EXOSC7/APTX/CPSF3/EXOSC9/DDX1/DCLRE1B/EXOSC2/AEN/EXOSC5/POLE/DCLRE1A/REXO4/PNPT1/MGME1/EXOSC4/POLD1/POLQ/EXO1/ZC3H12A/FEN1
BP	GO:0071459	protein localization to chromosome, centromeric region	23	-0.79195	-2.18267	1.28184e-06	1.68702e-05	1.00792e-05	2603	tags=65%, list=13%, signal=57%	CHAMP1/MTBP/ZW10/SPDL1/CENPQ/RCC2/BUB3/ZWILCH/NDC80/TTK/BUB1B/CENPA/AURKB/CDK1/CDT1
BP	GO:0000387	spliceosomal snRNP assembly	39	-0.704626	-2.17378	1.32824e-06	1.74525e-05	1.04271e-05	5079	tags=85%, list=26%, signal=63%	PRMT7/AAR2/SNUPN/PRPF3/SMN1/DDX20/GEMIN5/PRPF31/SART1/SRSF10/GEMIN6/SART3/GEMIN7/GEMIN2/PRPF6/COIL/SNRPD3/SNRPD2/CLNS1A/TGS1/PRPF19/STRAP/WDR77/GEMIN4/LSM2/SNRPE/PRMT5/SNRPF/SNRPG/SNRPC/LSM4/SNRPB/SNRPD1
BP	GO:0001763	morphogenesis of a branching structure	184	0.556205	1.7449	1.33128e-06	1.74642e-05	1.04341e-05	2541	tags=34%, list=13%, signal=30%	SFRP2/GREM1/SFRP1/RSPO3/FGF7/FOXF1/TNC/SLIT2/SULF1/CCL11/EDNRA/CLIC4/GPC3/SIX2/AGT/PKD2/DCHS1/TCF21/FGF10/GLI3/FGF2/EPHA7/NTN4/TIE1/FAT4/TGFBR2/PBX1/ENG/NFATC4/SEMA3C/SMO/GLI2/EDN1/HOXA5/RASIP1/WNT2B/NRP1/LEF1/PKD1/HGF/LRRK2/HHIP/RSPO2/PTCH1/BCL2/NOTCH4/SPRY1/KDR/FOXC2/COL4A1/AR/TGM2/SEMA3E/SEMA3A/PLXND1/CSF1/ACVR1/PGR/SOX8/RTN4/MMP14/NOG
BP	GO:0003158	endothelium development	124	0.609475	1.85288	1.41933e-06	1.85891e-05	1.11061e-05	2776	tags=47%, list=14%, signal=40%	ZEB1/CLDN5/PTN/S1PR1/FSTL1/S1PR3/PECAM1/CLIC4/HEG1/TMEM100/COL15A1/ARHGEF26/CXCR4/MYADM/RHOB/CD34/MSN/PTPRS/GJA1/PDE2A/CDH5/TIE1/GJA4/ENG/PPP1R16B/APOLD1/RDX/NR2F2/SOX17/SOX18/PDPN/VCL/ACVRL1/NRP1/BMP6/COL18A1/GJA5/ATOH8/NOTCH4/KDR/FOXC2/STC1/STARD13/ROBO4/BMPR2/SCUBE1/RAP1A/ITGAX/PDE4D/HEY2/ACVR1/ADAMTS12/S1PR2/ADD1/FOXP1/GSTM3/BTG1/PLCB1
BP	GO:0051493	regulation of cytoskeleton organization	480	0.461859	1.51097	1.42748e-06	1.86656e-05	1.11519e-05	2430	tags=26%, list=12%, signal=24%	SYNPO2/LMOD1/CCL21/ELN/SFRP1/FLNA/CLIP3/NEXN/MAP1B/FERMT2/CXCL12/JAM3/SVIL/S1PR1/SYNPO/MYOC/SLIT2/MAP1A/CAPN6/FAM107A/CFL2/TMOD1/CCL11/EPHA3/CLIC4/DIXDC1/GSN/PDGFRB/PDGFRA/CDC42EP3/TGFB3/PHLDB2/TPM1/LPAR1/DLC1/SYDE1/CCR7/CGNL1/MYADM/RHOB/TEK/CDH5/LRP1/RGS4/STMN2/RDX/EVL/MAP6/CSF1R/GNAI1/PHLDB1/ARHGEF15/EDN1/KANK3/HCLS1/PAM/NRP1/AFAP1/ARHGDIB/PKD1/MAP9/WASF3/ASAP3/NCKAP1L/RGCC/PLEKHH2/RHOQ/MAPRE2/…
MF	GO:0050431	transforming growth factor beta binding	24	0.842765	2.02677	1.44395e-06	1.88505e-05	1.12623e-05	2376	tags=75%, list=12%, signal=66%	LTBP1/THBS1/LRRC32/LTBP3/TGFB3/LTBP4/CD36/TGFBR2/ENG/TGFBR3/VASN/CD109/ACVRL1/TWSG1/NRROS/TGFBR1/ITGAV/ACVR1
BP	GO:0060840	artery development	85	0.657213	1.92156	1.49708e-06	1.94984e-05	1.16494e-05	2286	tags=41%, list=12%, signal=37%	MYLK/HAND2/FOXF1/NGFR/MYOCD/AKT3/COMP/EFEMP2/PDGFRB/PRRX1/PKD2/LOXL1/PDE2A/GLI3/ROBO1/LRP1/ENG/HPGD/PRICKLE1/ACVRL1/NRP1/LOX/GJA5/APOE/FOXC2/TGFBR1/TBX2/BMPR2/TGFB2/ZMIZ1/ADAMTS9/PLXND1/HEY2/NDST1/SMAD7
BP	GO:0043624	cellular protein complex disassembly	211	-0.411888	-1.68187	1.49839e-06	1.94984e-05	1.16494e-05	4004	tags=51%, list=20%, signal=41%	MRPL55/SH3GL1/UPF1/MAP6D1/SPAST/MRPL42/MID1IP1/MRPL28/MRPL20/OXA1L/CHCHD1/MRPL40/HSPA8/GFM2/MRPS31/MRPS24/GADD45GIP1/MRPS27/TRMT112/MRPL27/MRPS18C/CIB1/PDXP/PEX14/KATNB1/MRPL51/MRPL35/MRPL22/KIF2A/CFL1/DAP3/MRPL32/MRPL24/MRPL57/MRPS16/MRPS25/GAK/MRPS33/NSF/MRRF/MRPL1/MRPS7/F2RL1/MRPS23/CAPZA1/CCSAP/MRPL30/MRPL52/MRPS30/MRPL9/MRPL41/MRPS10/MRPS15/MRPL21/MRPS22/MRPL45/TWF1/MRPS18B/MRPS28/AURKAIP1/M…
MF	GO:0050840	extracellular matrix binding	52	0.717052	1.96442	1.50435e-06	1.95338e-05	1.16705e-05	2543	tags=54%, list=13%, signal=47%	SPARCL1/SMOC2/ELN/DCN/SSC5D/FBLN2/THBS1/BGN/SLIT2/ITGA9/CLEC14A/NID1/SPARC/SPOCK2/NTN4/LGALS1/CD248/TGFBI/BCAM/ECM1/ITGB3/OLFML2A/THSD1/ITGAV/ITGB1/ADAMTS15/ADAMTS5/PLEKHA2
BP	GO:0031346	positive regulation of cell projection organization	323	0.498665	1.61271	1.50834e-06	1.95338e-05	1.16705e-05	3958	tags=39%, list=20%, signal=31%	CCL19/DPYSL3/CCL21/FLNA/SERPINF1/MAP1B/NGFR/PTN/CXCL12/NTN1/SLIT2/ROR2/PALM/EPHA3/KIT/RGS2/FN1/CDC42EP3/TGFB3/ENPP2/TOX/NEGR1/CNTN1/CCR7/ATP1B2/ROBO1/LRP1/FZD4/STMN2/DOCK11/MAP6/NDNF/CAMK1D/PRKD1/DZIP1/PLXNA4/L1CAM/FEZ1/CNR1/ROR1/NRP1/DLG4/CRABP2/OBSL1/FZD1/PLXNC1/HGF/RHOQ/MACF1/FYN/CX3CL1/SCN1B/APOE/VLDLR/ARSB/EPHA4/ISLR2/ADCYAP1/TGFBR1/BMPR2/AUTS2/RAB8B/FES/P2RX7/SEMA5A/TENM3/PIK3R1/AMIGO1/FUZ/…
BP	GO:0002920	regulation of humoral immune response	74	0.674124	1.93614	1.50835e-06	1.95338e-05	1.16705e-05	2822	tags=45%, list=14%, signal=38%	C7/A2M/CLU/C1S/SERPING1/C1R/PGC/C3/CFH/CR2/C4A/C4B/CCR7/PROS1/CXCL13/PTPRC/VTN/FCER2/C3AR1/C5AR1/CFI/CD19/VSIG4/CD59/C1QA/SPINK5/C1QC/C1QB/FCGR2B/CFP/CR1/CD81/C6
BP	GO:0048754	branching morphogenesis of an epithelial tube	141	0.579654	1.78547	1.5165e-06	1.96079e-05	1.17148e-05	2541	tags=35%, list=13%, signal=31%	SFRP2/GREM1/FOXF1/TNC/SLIT2/CCL11/EDNRA/CLIC4/GPC3/SIX2/AGT/PKD2/DCHS1/TCF21/FGF10/GLI3/FGF2/TIE1/FAT4/TGFBR2/PBX1/ENG/NFATC4/SMO/GLI2/EDN1/HOXA5/RASIP1/WNT2B/NRP1/LEF1/PKD1/HHIP/RSPO2/PTCH1/BCL2/NOTCH4/SPRY1/KDR/FOXC2/COL4A1/AR/SEMA3E/PLXND1/CSF1/ACVR1/PGR/SOX8/MMP14/NOG
BP	GO:0017015	regulation of transforming growth factor beta receptor signaling pathway	118	0.607309	1.83568	1.52069e-06	1.96307e-05	1.17284e-05	2433	tags=35%, list=12%, signal=31%	ASPN/LTBP1/THBS1/EMILIN1/MYOCD/TGFB1I1/FBN1/CAV1/HTRA3/TGFB3/LTBP4/DKK3/DAB2/HTRA1/TGFB1/TGFBR2/ENG/TGFBR3/LDLRAD4/CDKN1C/PEG10/VASN/NREP/CD109/CITED2/CAV2/LOX/CDKN2B/SPRY1/NRROS/LATS2/TGFBR1/ADAMTSL2/CHST11/PMEPA1/SKIL/HSPA1A/SMAD7/PBLD/SKI/RASL11B
BP	GO:0002181	cytoplasmic translation	99	-0.52571	-1.92559	1.52961e-06	1.97144e-05	1.17785e-05	5728	tags=65%, list=29%, signal=46%	RPL39/DPH6/RPL17/EIF4A1/EIF3G/MTOR/CNBP/EIF3K/EIF2D/ETF1/RPL31/RPS29/EIF3C/RPL6/RPS28/RPL9/RPL30/GSPT1/RPL36/RPL35A/METTL3/DPH5/RPL32/RPL41/RPL38/EIF5/FMR1/RPL18A/RPS26/EIF3H/RPL24/RPLP2/YTHDF2/EIF3A/RPL36A/RPL19/EIF3J/EIF4H/DPH7/DENR/EIF3D/FTSJ1/RPS21/EIF3M/TMA7/EIF2S3/RPL29/RPLP0/ZC3H15/EIF3E/MCTS1/RPL18/RPL26L1/DHX9/DRG1/EIF4G1/EIF3I/EIF2S2/EIF3B/RPSA/RPL8/DPH2/PKM/RPL22L1
BP	GO:1903037	regulation of leukocyte cell-cell adhesion	310	0.503072	1.62484	1.54045e-06	1.98225e-05	1.1843e-05	3195	tags=37%, list=16%, signal=31%	CCL19/CCL21/SELP/FGL2/CXCL12/LRRC32/CAV1/IGF2/GPNMB/CCL2/ITPKB/DTX1/CCR7/THY1/VCAM1/NR4A3/GLI3/ZBTB16/IL6ST/LGALS1/TGFBR2/EGR3/PRNP/PTPRC/CD27/GLI2/ETS1/SASH3/IL7R/HLA-DPB1/LEF1/LAPTM5/IGF1/AIF1/NCKAP1L/ST3GAL4/FYN/TWSG1/SELE/CD5/HLA-DPA1/ALOX5/CD4/SPN/VSIG4/RASAL3/DOCK8/BCL6/CARD11/CD3E/TNFRSF13C/CD1D/ITGA4/JAK3/STAT5B/PLA2G2D/CORO1A/TNFSF13B/GATA3/LAX1/CD28/ZMIZ1/TESPA1/CD40LG/ITGB2/PTAFR/PIK3R…
BP	GO:0002460	adaptive immune response based on somatic recombination of immune receptors built from immunoglobulin superfamily domains	246	0.526143	1.67878	1.57113e-06	2.01852e-05	1.20597e-05	3843	tags=42%, list=19%, signal=34%	C7/CCL19/CLU/IL33/C1S/SERPING1/C1R/C3/IL1R1/CR2/RFTN1/MEF2C/C4A/C4B/IGLL5/CD1C/CXCL13/TGFB1/GAPT/PTPRC/CD27/SASH3/IL7R/LEF1/FCER2/SLAMF6/CFI/WAS/TLR4/CD19/BTK/CD4/SPN/RORA/BCL6/CD1D/JAK3/SWAP70/C1RL/C1QA/KLHL6/GZMM/TNFSF13B/GATA3/CD28/C1QC/CD1E/CD40LG/IL6R/EBI3/IRF4/MR1/CD40/CLC/BACH2/C1QB/HLA-DRA/CD74/MLH1/CCR2/ANXA1/CD8A/FCGR2B/SMAD7/LY9/IL18BP/RSAD2/RAB27A/PPP3CB/CR1/HLA-DRB1/IL4R/SOCS5/INPP5D…
BP	GO:0045047	protein targeting to ER	108	-0.511743	-1.92255	1.58251e-06	2.02992e-05	1.21278e-05	6190	tags=75%, list=31%, signal=52%	RPL10A/SRP19/RPL15/RPL23/RPLP1/CHMP4B/UBA52/RPL27A/RPL39/EDEM1/RPL28/RPL17/RPL37/RPS14/RPL5/RPS27A/RPS20/RPL31/RPS24/RPS29/RPS8/RPL3/ZFAND2B/RPL6/RPS28/RPL9/RPL30/RPS11/RPL36/RPS3A/RPS13/RPL4/RPS17/RPL35A/RPL32/RPL41/SPCS2/SEC61B/RPL38/RPS10/RPS12/RPS16/SPCS1/RPL23A/SSR3/RPL18A/RPS26/RPS4X/RPS5/RPL24/RPLP2/RPS6/RPL37A/RPL36A/RPL19/SRP72/SRP68/RPL35/SRP54/SEC61G/RPS15/SEC61A1/SGTA/RPL7/RPL14/RPS21…
BP	GO:0022409	positive regulation of cell-cell adhesion	267	0.5209	1.67025	1.61316e-06	2.06596e-05	1.23432e-05	3822	tags=44%, list=19%, signal=36%	CCL19/CCL21/SELP/CAV1/IGF2/CCL2/ITPKB/CCR7/THY1/VCAM1/NR4A3/GLI3/ZBTB16/IL6ST/CXCL13/LGALS1/TGFBR2/EGR3/PTPRC/CD27/GLI2/ADAM19/PDPN/ETS1/CITED2/FSTL3/SASH3/IL7R/HLA-DPB1/LEF1/IGF1/AIF1/NCKAP1L/ST3GAL4/FYN/CX3CL1/SELE/CD5/HLA-DPA1/ALOX5/CD4/RASAL3/DOCK8/BCL6/CARD11/CD3E/TNFRSF13C/CD1D/ITGA4/JAK3/STAT5B/CORO1A/TNFSF13B/GATA3/CD28/ZMIZ1/TESPA1/CD40LG/ITGB2/PTAFR/PIK3R1/EBI3/RHOH/HLA-DRA/CD74/CD6/VAV…
BP	GO:0006941	striated muscle contraction	165	0.572514	1.78495	1.62013e-06	2.07161e-05	1.23769e-05	2306	tags=27%, list=12%, signal=24%	PLN/SYNM/FLNA/CASQ2/CAV1/ATP1A2/KCNE4/KCNJ8/RGS2/DMPK/GSN/TPM1/CACNA2D1/CXCR4/DMD/ACTC1/ANK2/CLIC2/GJA1/CACNA1C/KCNH2/SMPX/CHGA/RCSD1/SCN4B/KCND3/EHD3/GJC1/CACNB2/PDE4B/DTNA/GJA5/SCN1B/KCNA5/PIK3CG/SLC8A1/VEGFB/STC1/KCNE2/GSTM2/SNTA1/PDE4D/CASQ1/SMAD7/CTNNA3
BP	GO:0000731	DNA synthesis involved in DNA repair	49	-0.645688	-2.09942	1.65588e-06	2.11399e-05	1.26301e-05	4297	tags=55%, list=22%, signal=43%	RPA1/RCHY1/RFC1/RPA2/WRN/MAD2L2/UBE2L6/PARP10/VCP/TRIM25/POLA1/USP10/POLDIP2/WRNIP1/POLE/RPA3/POLD3/RFC5/POLD1/USP43/RFC2/POLE2/RFC4/POLD2/RFC3/PCNA/DTL
BP	GO:0006940	regulation of smooth muscle contraction	54	0.705244	1.94012	1.68436e-06	2.14696e-05	1.28271e-05	2584	tags=44%, list=13%, signal=39%	CNN1/TACR2/KCNMA1/MYOCD/CAV1/ATP1A2/KIT/RGS2/PRKG1/F2R/CHRM2/CALCRL/CHRNA3/ADRA2A/EDN1/GHRL/GPER1/P2RX1/TBXA2R/ADRB2/PTAFR/DAPK3/TACR1/DOCK4
CC	GO:0030686	90S preribosome	26	-0.770155	-2.18744	1.70161e-06	2.16554e-05	1.29381e-05	3442	tags=85%, list=17%, signal=70%	NOP9/RSL1D1/UTP20/MPHOSPH10/IMP3/UTP6/BMS1/RRP36/HEATR1/WDR3/TBL3/RRP7A/WDR12/NOP14/FAM207A/UTP18/PES1/NOC4L/IMP4/NOL6/NOC2L/BOP1
BP	GO:0045444	fat cell differentiation	206	0.547158	1.7261	1.77363e-06	2.25042e-05	1.34452e-05	3095	tags=31%, list=16%, signal=26%	SFRP2/SFRP1/FRZB/CLIP3/FABP4/FERMT2/TGFB1I1/WWTR1/MEDAG/DIO2/RGS2/RARRES2/PDGFRA/STEAP4/SLC2A4/FABP3/NR4A3/MAFB/FGF10/ZBTB16/CCDC3/TGFB1/RUNX1T1/EGR2/C1QTNF3/ZFPM2/LPL/LMO3/GPER1/FNDC5/ZFP36/ALOX5/RORA/ARID5B/PTGS2/ADRB2/GATA3/CMKLR1/HTR2A/ZFP36L1/ADIPOQ/PIM1/CREBL2/JDP2/MMP11/CCDC71L/NR4A1/GATA2/EBF2/ZNF516/SOX8/AAMDC/FOXO1/LRP3/ZNF385A/PLCB1/RNASEL/FTO/GDF6/NR4A2/ENPP1/INHBB/BNIP3/TRIO
BP	GO:0072676	lymphocyte migration	115	0.604861	1.82457	1.77577e-06	2.25042e-05	1.34452e-05	3191	tags=39%, list=16%, signal=33%	APOD/CCL19/CCL21/JAM2/CXCL12/S1PR1/CH25H/CCL11/GPR183/CCL2/CCR7/CXCL14/MSN/CXCL13/CD200/CYP7B1/GAS6/AIF1/ECM1/CD99L2/MADCAM1/CX3CL1/ITGAL/PIK3CG/SPN/PIK3CD/CCL22/DOCK8/ITGA4/GATA3/CCL14/GPR15/RET/CCL23/CCR2/STK10/CCL5/ZAP70/CCL13/MYO1G/CCL26/CXCR3/PADI2/GCSAM/CD200R1
BP	GO:0030512	negative regulation of transforming growth factor beta receptor signaling pathway	80	0.65517	1.89991	1.77665e-06	2.25042e-05	1.34452e-05	2433	tags=36%, list=12%, signal=32%	ASPN/LTBP1/EMILIN1/TGFB1I1/FBN1/CAV1/HTRA3/TGFB3/HTRA1/TGFB1/TGFBR2/TGFBR3/LDLRAD4/PEG10/VASN/CD109/CAV2/SPRY1/NRROS/TGFBR1/ADAMTSL2/CHST11/PMEPA1/SKIL/HSPA1A/SMAD7/PBLD/SKI/RASL11B
CC	GO:0098644	complex of collagen trimers	21	0.860209	2.03086	1.81037e-06	2.28955e-05	1.3679e-05	1674	tags=62%, list=8%, signal=57%	COL8A1/LUM/COL3A1/COL1A2/COL16A1/COL5A1/COL4A2/COL1A1/COL4A4/COL4A5/COL5A2/COL4A6/COL4A1
BP	GO:0014066	regulation of phosphatidylinositol 3-kinase signaling	120	0.603446	1.82808	1.81918e-06	2.29508e-05	1.3712e-05	3819	tags=48%, list=19%, signal=39%	DCN/SELP/MYOC/ROR2/FGFR1/KIT/FN1/SERPINE2/PDGFRB/PDGFRA/AGT/TEK/F2R/FGF2/PDGFD/PPP1R16B/PIK3IP1/HCST/HCLS1/PTPN13/ROR1/PDGFC/IGF1/HGF/GPER1/FYN/TWIST1/PIP4K2A/PIK3CG/PIK3CD/KDR/IRS2/ANGPT1/GAB1/TGFB2/CD28/PIP5K1C/PIK3R1/PIK3R5/NLRC3/EGFR/FGR/CCL5/NTRK2/NCF1/FLT1/IGF1R/FBXL2/INSR/FLT3/NEDD4/PDGFA/UNC5B/PTEN/PDGFB/PIK3CA/PPP2R5B/NTF3
BP	GO:0055002	striated muscle cell development	98	0.636686	1.88829	1.82041e-06	2.29508e-05	1.3712e-05	2408	tags=31%, list=12%, signal=27%	MYH11/LMOD1/FLNC/PGM5/CSRP1/CFL2/COMP/TMOD1/LDB3/PDGFRB/PDGFRA/TPM1/DMD/ACTC1/SMO/EDN1/CSRP2/CAV2/LOX/OBSL1/MEF2A/BCL2/ACTN2/SGCB/TMOD2/FHOD3/CASQ1/HDAC9/SKI/AKAP13
BP	GO:1902105	regulation of leukocyte differentiation	270	0.513444	1.64723	1.84505e-06	2.32216e-05	1.38738e-05	3277	tags=38%, list=17%, signal=32%	CCL19/SFRP1/FGL2/FBN1/ROR2/RASSF2/AXL/LTF/TOX/ITPKB/DTX1/EVI2B/MAFB/GLI3/ZBTB16/IL34/CARTPT/TGFB1/LRRC17/TGFBR2/EGR3/GAS6/PTPRC/CD27/GLI2/HCLS1/GPR68/FSTL3/SASH3/IL7R/MITF/LEF1/TYROBP/TREM2/INHBA/NCKAP1L/TLR4/HLA-DOA/BTK/CD4/BCL6/CD2/CARD11/KLF10/JAK3/STAT5B/SPINK5/GATA3/CD28/NOTCH2/FES/ZMIZ1/C1QC/TESPA1/JUN/ZFP36L1/PIK3R1/CLDN18/ADIPOQ/FOS/FCRL3/IRF4/RHOH/HLA-DRA/CD74/IKZF3/CCR2/ANXA1/FCGR2B/GAT…
BP	GO:0090307	mitotic spindle assembly	60	-0.606754	-2.04294	1.84763e-06	2.32216e-05	1.38738e-05	3134	tags=53%, list=16%, signal=45%	RAB11A/CHMP5/CHMP2B/KIF2A/CHMP1A/SMC3/HNRNPU/AAAS/CCSAP/KPNB1/MISP/DRG1/SMC1A/BCCIP/HSPA1B/KIFC2/CHEK2/CHMP4C/MZT1/KIF23/RCC1/RACGAP1/KIF11/KIFC1/PRC1/KIF4A/AURKB/PLK1/NEK2/MYBL2/TPX2/CDC20
BP	GO:0010171	body morphogenesis	46	0.73365	1.98316	1.912e-06	2.39934e-05	1.4335e-05	2541	tags=46%, list=13%, signal=40%	GREM2/CLDN5/MMP2/CRISPLD2/PDGFRA/GPC3/CRISPLD1/TGFB3/PHLDB2/COL1A1/PHLDB1/RRAS/CDON/LEF1/SCX/ARID5B/FUZ/CSRNP1/MAB21L2/SKI/NOG
BP	GO:0030038	contractile actin filament bundle assembly	98	0.636095	1.88654	1.93978e-06	2.42667e-05	1.44982e-05	3512	tags=48%, list=18%, signal=40%	ELN/SFRP1/SORBS1/FERMT2/S1PR1/MYOC/TGFB3/PHLDB2/TPM1/LPAR1/DLC1/CGNL1/EVL/ARHGEF15/NRP1/ASAP3/RGCC/PFN2/ARHGAP6/WAS/PTGER4/CORO2B/ARHGEF10/TAC1/TGFBR1/LIMCH1/PIK3R1/ZYX/CCDC88A/APOA1/SORBS3/GPR65/NOX4/PPM1F/PHACTR1/ITGB5/ABL1/PPP1R9A/RAPGEF3/INPP5K/ROCK1/ARRB1/WASF2/SERPINF2/ARHGAP28/SRF/TJP1
BP	GO:0043149	stress fiber assembly	98	0.636095	1.88654	1.93978e-06	2.42667e-05	1.44982e-05	3512	tags=48%, list=18%, signal=40%	ELN/SFRP1/SORBS1/FERMT2/S1PR1/MYOC/TGFB3/PHLDB2/TPM1/LPAR1/DLC1/CGNL1/EVL/ARHGEF15/NRP1/ASAP3/RGCC/PFN2/ARHGAP6/WAS/PTGER4/CORO2B/ARHGEF10/TAC1/TGFBR1/LIMCH1/PIK3R1/ZYX/CCDC88A/APOA1/SORBS3/GPR65/NOX4/PPM1F/PHACTR1/ITGB5/ABL1/PPP1R9A/RAPGEF3/INPP5K/ROCK1/ARRB1/WASF2/SERPINF2/ARHGAP28/SRF/TJP1
BP	GO:0060968	regulation of gene silencing	100	-0.524139	-1.92926	1.95123e-06	2.4351e-05	1.45486e-05	4603	tags=59%, list=23%, signal=45%	MAP2K2/NUP214/FXR1/POLR2A/ADAR/POLR2C/LIMD1/POLR2K/TP53/MAP2K1/ELAVL1/POLR2I/NUP133/SIRT6/FMR1/POLR2G/NUP153/POM121/NUP93/POLR2E/POLR2B/EIF4E2/NUP62/NUP98/MYCN/POLR2J/SEC13/POM121C/NUP88/NUP160/NUP54/POLR2L/NUP107/NUP43/AAAS/AJUBA/AGO2/TARBP2/PPARG/NUP155/POLR2D/DHX9/CDK2/NUP85/EIF4G1/NUP35/SEH1L/NUP50/RAE1/NUP188/NUP205/POLR2H/NUP37/XPO5/NDC1/ZC3H12A/ATAD2/HMGA1/CDC45
BP	GO:0001818	negative regulation of cytokine production	270	0.512476	1.64413	1.95253e-06	2.4351e-05	1.45486e-05	3335	tags=36%, list=17%, signal=30%	APOD/IL33/SSC5D/THBS1/LRRC32/SYT11/AXL/FN1/LTF/GPNMB/TGFB3/CCR7/CD34/PTPRS/TGFB1/KLF2/CD200/C1QTNF3/PRNP/GAS6/PTPRC/SRGN/GHRL/BANK1/LEF1/TYROBP/TREM2/LAPTM5/CX3CR1/INHBA/IGF1/HGF/NCKAP1L/RGCC/TWSG1/TWIST1/CX3CL1/ZFP36/TLR4/BTK/VSIG4/CD84/BCL6/PTGER4/ANGPT1/JAK3/GATA3/CMKLR1/TGFB2/ADIPOQ/NDRG2/APOA1/MERTK/NLRC3/HERC5/ANXA1/FCGR2B/SMAD7/HDAC9/CD96/NAV3/CYLD/TLR6/CR1/ERRFI1/LILRA4/HOMER3/RNF125/RARA…
BP	GO:1903844	regulation of cellular response to transforming growth factor beta stimulus	121	0.601768	1.82629	1.9916e-06	2.48e-05	1.48169e-05	2433	tags=34%, list=12%, signal=30%	ASPN/LTBP1/THBS1/EMILIN1/MYOCD/TGFB1I1/FBN1/CAV1/HTRA3/TGFB3/LTBP4/DKK3/DAB2/HTRA1/TGFB1/TGFBR2/ENG/TGFBR3/LDLRAD4/CDKN1C/PEG10/VASN/NREP/CD109/CITED2/CAV2/LOX/CDKN2B/SPRY1/NRROS/LATS2/TGFBR1/ADAMTSL2/CHST11/PMEPA1/SKIL/HSPA1A/SMAD7/PBLD/SKI/RASL11B
BP	GO:0070268	cornification	112	-0.497934	-1.88763	2.0078e-06	2.49634e-05	1.49145e-05	3158	tags=21%, list=16%, signal=17%	PCSK6/SPRR2A/DSC2/KRT6A/KRT17/PKP4/CAPN1/KRT6B/SPRR1B/PRSS8/EVPL/DSP/KRT16/PERP/PKP2/JUP/DSG2/KRT19/ST14/KRT8/KRT18/PKP3/PI3
BP	GO:0000469	cleavage involved in rRNA processing	27	-0.771951	-2.18289	2.02417e-06	2.51283e-05	1.5013e-05	3442	tags=85%, list=17%, signal=70%	NOP9/UTP20/RCL1/EXOSC10/ERI2/BMS1/ERI1/RRP36/TSR1/RPS21/EXOSC3/NHP2/ABT1/EXOSC7/EXOSC9/TBL3/NOB1/RPP40/EXOSC2/NOP14/EXOSC8/RRS1/BOP1
BP	GO:0045926	negative regulation of growth	233	0.528786	1.68466	2.08605e-06	2.58568e-05	1.54483e-05	2618	tags=27%, list=13%, signal=24%	SFRP2/FHL1/GREM1/SFRP1/CRYAB/FRZB/IGFBP5/PI16/DACT3/SLIT3/NTN1/RERG/SLIT2/RGS2/SERPINE2/GPC3/APBB1/NPR1/PTPRS/GJA1/EPHA7/MEIS1/TGFB1/SEMA3G/WFDC1/RGS4/TGFBR2/SEMA3C/SOX17/WWC3/SEMA6A/ACVRL1/NRP1/INHBA/TSPYL2/RBP4/SEMA6B/PTCH1/BCL2/BCL6/SEMA6D/SEMA6C/KCNK2/ADRB2/SEMA3E/BMPR2/TGFB2/NOTCH2/SMARCA2/SEMA5A/MAP2/MT1M/BDKRB1/HSPA1A/SIPA1/SEMA3A/SOCS2/SEMA4C/RTN4/NOG/DCBLD2/MAPK11/SEMA7A
BP	GO:0072599	establishment of protein localization to endoplasmic reticulum	112	-0.496476	-1.88211	2.10418e-06	2.60416e-05	1.55586e-05	6190	tags=73%, list=31%, signal=51%	RPL10A/SRP19/RPL15/RPL23/RPLP1/CHMP4B/UBA52/RPL27A/RPL39/EDEM1/RPL28/RPL17/RPL37/RPS14/RPL5/RPS27A/RPS20/RPL31/RPS24/RPS29/RPS8/RPL3/ZFAND2B/RPL6/RPS28/RPL9/RPL30/RPS11/RPL36/RPS3A/RPS13/RPL4/RPS17/RPL35A/RPL32/RPL41/SPCS2/SEC61B/RPL38/RPS10/RPS12/RPS16/RAB10/SPCS1/RPL23A/SSR3/RPL18A/RPS26/RPS4X/RPS5/RPL24/RPLP2/RPS6/RPL37A/RPL36A/RPL19/SRP72/SRP68/RPL35/SRP54/SEC61G/RPS15/SEC61A1/SGTA/RPL7/RPL14…
BP	GO:0032231	regulation of actin filament bundle assembly	94	0.640533	1.88834	2.11406e-06	2.6124e-05	1.56079e-05	3512	tags=50%, list=18%, signal=41%	SYNPO2/SFRP1/FLNA/FERMT2/S1PR1/SYNPO/MYOC/TGFB3/PHLDB2/TPM1/LPAR1/DLC1/CGNL1/RDX/EVL/ARHGEF15/NRP1/ASAP3/RGCC/PFN2/ARHGAP6/CX3CL1/WAS/PTGER4/SWAP70/CORO2B/ARHGEF10/TAC1/TGFBR1/LIMCH1/PIK3R1/CCDC88A/APOA1/SORBS3/PLEK/GPR65/NOX4/PPM1F/ABL1/PPP1R9A/RAPGEF3/INPP5K/ROCK1/WASF2/SERPINF2/ARHGAP28/TJP1
BP	GO:0031023	microtubule organizing center organization	135	-0.471361	-1.85378	2.13952e-06	2.63983e-05	1.57718e-05	4464	tags=45%, list=23%, signal=35%	CCDC78/NSFL1C/SPICE1/CEP192/CEP250/RTTN/HAUS4/CNTROB/CEP152/PDCD6IP/CEP295/ATF5/CEP76/HAUS2/HAUS8/CHMP5/HAUS1/CHMP2B/SSX2IP/XRCC3/CHMP1A/NUP62/HAUS5/CTNNB1/SLC16A1/CENPJ/MCIDAS/CHORDC1/ODF2/PARD6B/RBM14/HAUS6/CDK2/E2F4/CEP131/GEN1/BRCA2/CEP85/NAT10/NPM1/FOXJ1/CKAP5/KAT2A/BRCA1/SASS6/WDR62/CEP72/SAC3D1/CHMP4C/CHEK1/XRCC2/RANBP1/NDC80/STIL/PLK4/CCNF/KIF11/CDK1/PLK1/NEK2/AURKA
BP	GO:0006027	glycosaminoglycan catabolic process	61	0.698681	1.96031	2.18976e-06	2.6977e-05	1.61175e-05	1528	tags=31%, list=8%, signal=29%	OGN/PRELP/DCN/LUM/OMD/FMOD/BGN/VCAN/GPC3/SDC2/CSPG4/GPC6/FGF2/HSPG2/TGFB1/LYVE1/SDC3/IDS/ARSB
BP	GO:0008360	regulation of cell shape	145	0.578753	1.78929	2.19963e-06	2.70291e-05	1.61486e-05	3108	tags=41%, list=16%, signal=35%	FERMT2/PTN/ITGA7/PALM/CCL11/KIT/RHOJ/FN1/CCL2/CDC42EP3/TPM1/LPAR1/DLC1/PLEKHO1/BVES/RHOB/MSN/PALMD/MYH10/PARVA/RDX/FGD5/CSF1R/PDPN/PLXNA4/FMNL3/WASF3/PLXNC1/RHOQ/FYN/EPB41L3/ARHGAP15/KDR/FMNL1/ATP10A/CORO1A/RHOBTB3/FGD1/SEMA3E/LST1/FES/ITGB2/RHOBTB1/PLXNB3/RHOH/FGD2/PLXND1/ANXA1/SYNE3/FGR/DAPK3/FGD3/FGD6/CCL13/RAC2/FBLIM1/RHOBTB2/HCK/P2RY1
BP	GO:0019935	cyclic-nucleotide-mediated signaling	84	0.655683	1.91069	2.20066e-06	2.70291e-05	1.61486e-05	3816	tags=43%, list=19%, signal=35%	THBS1/PDE3A/PRKAR2B/AQP1/CAP2/RGS2/APLNR/LPAR1/NPR1/PRKG1/CD36/PDE2A/PDE7B/RASD2/EDNRB/GNAI1/NPR2/AKAP6/APOE/PDE9A/HTR2B/ADCYAP1/CRTC3/PDE4D/NPPC/PDE10A/SCT/GIP/SCTR/ADCY2/RAPGEF3/KSR1/AHR/RAPGEF4/PRKAR1A/PDE3B
BP	GO:0000462	maturation of SSU-rRNA from tricistronic rRNA transcript (SSU-rRNA, 5.8S rRNA, LSU-rRNA)	34	-0.71821	-2.14475	2.26083e-06	2.77259e-05	1.6565e-05	5285	tags=91%, list=27%, signal=67%	RPS14/TSR2/UTP23/KRI1/RPS8/MRPS11/UTP3/RPS16/NOP9/UTP20/ERCC2/RCL1/UTP6/BMS1/RRP36/NGDN/DHX37/TSR1/RPS21/WDR46/HEATR1/ABT1/RPS19/TBL3/NOL10/RPP40/NOP14/FAM207A/DCAF13/RRS1/BYSL
BP	GO:0048638	regulation of developmental growth	297	0.503764	1.62165	2.26788e-06	2.77703e-05	1.65915e-05	3282	tags=33%, list=17%, signal=28%	PI16/MAP1B/CXCL12/NTN1/RGS2/FN1/IGF2/MEF2C/BASP1/CXCR4/FOXS1/PTPRS/GLI1/GJA1/FGF2/EPHA7/MEIS1/SEMA3G/LRP1/GHR/RGS4/TGFBR2/TGFBR3/SEMA3C/SMO/ZFPM2/EDN1/GHRL/ACACB/PLXNA4/L1CAM/WWC3/SASH3/SEMA6A/OLFM1/NRP1/CRABP2/IGF1/MACF1/GAMT/RBP4/SEMA6B/DPYSL2/PTCH1/AKAP6/SOX15/BCL2/REG1A/APOE/LATS2/FOXC2/SEMA6D/SEMA6C/KCNK2/ISLR2/STAT5B/ADRB2/AR/TGFBR1/TBX2/SEMA3E/BMPR2/CPNE5/SEMA5A/NPY1R/PIM1/MAP2/DBN1/MUSK/N…
BP	GO:0050890	cognition	266	0.513515	1.64538	2.27733e-06	2.78439e-05	1.66355e-05	3636	tags=34%, list=18%, signal=28%	TACR2/SERPINF1/CLDN5/PTN/ATP1A2/MAP1A/PRKAR2B/FAM107A/VIP/CCL11/SYT11/KIT/MEF2C/SLC2A4/ITGA5/NRXN3/SOBP/NFATC4/EGR2/PRNP/BCHE/TUSC3/GPR155/CNR1/NRXN2/BTG2/DLG4/CX3CR1/PJA2/PDE1B/ST3GAL4/FYN/SNAP25/SHROOM4/C5AR1/APOE/VLDLR/KCNK2/S100B/ATXN1/TAC1/C1QL1/HTR2A/NPTX2/JUN/FOS/NLGN4Y/NLGN3/TMOD2/HLA-DRA/MUSK/SLC8A2/EGFR/NGF/CBR3/PTPRZ1/GRPR/PRRT1/SYNGAP1/PPP3CB/NTRK2/GRIN2A/DKK1/PTCHD1/KALRN/GIP/SGK1/ZN…
BP	GO:0060562	epithelial tube morphogenesis	306	0.500242	1.61379	2.28698e-06	2.79198e-05	1.66808e-05	2600	tags=28%, list=13%, signal=25%	SFRP2/GREM1/SFRP1/HAND2/FOXF1/NTN1/TNC/SLIT2/CCL11/EDNRA/CLIC4/MEF2C/GPC3/SIX2/AGT/PKD2/DLC1/CXCR4/DCHS1/RHOB/TCF21/CTHRC1/FGF10/GLI3/FGF2/EPHA7/PRKACB/TGFB1/TIE1/FAT4/TGFBR2/PBX1/ENG/NFATC4/CSF1R/SOX17/SMO/GLI2/EDN1/SOX18/HOXA5/RASIP1/WNT2B/PRICKLE1/ACVRL1/NRP1/LEF1/PKD1/HHIP/TWIST1/RSPO2/PTCH1/BCL2/NOTCH4/MTSS1/PIK3CD/SPRY1/VANGL2/KDR/LMO4/FOXC2/EPHA4/COL4A1/AR/STARD13/TBX2/SEMA3E/GATA3/TGFB2/N…
BP	GO:0030595	leukocyte chemotaxis	216	0.53389	1.69496	2.35489e-06	2.87056e-05	1.71502e-05	3105	tags=39%, list=16%, signal=34%	THBS4/CCL19/GREM1/CCL21/THBS1/PTN/CXCL12/JAM3/S1PR1/CH25H/SLIT2/DUSP1/CCL11/KIT/RARRES2/GPR183/CCL2/CXCR4/ITGA1/CCR7/CXCL14/VEGFC/CXCL13/IL34/CHGA/CYP7B1/SCG2/EDNRB/CSF1R/SERPINE1/CAMK1D/GAS6/EDN1/PDE4B/MMP28/AIF1/NCKAP1L/IL16/C3AR1/C5AR1/CX3CL1/PIK3CG/ALOX5/CXCL17/RIN3/GPSM3/PIK3CD/CCL22/BST1/VEGFB/STAP1/PREX1/CORO1A/SWAP70/CMKLR1/CCL14/TGFB2/PIP5K1C/ITGB2/IL6R/CD74/VAV1/CCL23/CCR2/CCR5/ANXA1/MP…
MF	GO:0008307	structural constituent of muscle	42	0.752022	2.01782	2.48157e-06	3.02043e-05	1.80456e-05	930	tags=29%, list=5%, signal=27%	MYH11/SYNM/MYL9/TPM2/NEXN/CSRP1/SMTN/TPM1/DMD/SORBS2/MYOM1/CSRP2
CC	GO:0034703	cation channel complex	217	0.5381	1.70833	2.50624e-06	3.04588e-05	1.81977e-05	3926	tags=31%, list=20%, signal=25%	KCNMB1/KCNMA1/CASQ2/CACNA1H/ABCC9/KCNE4/KCNJ8/CACNA2D1/PKD2/HSPA2/CACNA1C/KCNH2/GRIK5/SCN4B/KCND3/SCN7A/CACNB2/KCNS3/PDE4B/DLG4/PKD1/TRPC1/SNAP25/VAMP2/SCN1B/AKAP6/KCNA3/KCNA5/MICU3/CACNG4/KCNE2/KCNK2/KCNB1/TRPC4/AMIGO1/KCND1/PDE4D/SCNN1B/CPT1C/RYR2/GRIN2A/KCNJ5/CACNA2D3/KCNQ4/OLFM2/TRPC6/KCNAB1/CACNA2D2/KCNN4/CACNB3/RYR3/DPP6/KCNIP1/SCN2B/KCNG1/KCNA1/KCNIP3/KCNAB2/GRIK3/DLG2/NLGN1/KCNF1/KCNMB4/S…
MF	GO:0030246	carbohydrate binding	256	0.514855	1.64719	2.53364e-06	3.07456e-05	1.83691e-05	2785	tags=29%, list=14%, signal=25%	SELP/PPP1R3C/CLEC3B/VCAN/CLEC14A/LAYN/COLEC12/ENPP2/MRC2/SELL/C4B/CNTN1/CLEC11A/CD34/CD93/LGALS1/ENG/ALDOB/CLEC10A/CD22/CD302/ITLN1/CD248/CLEC2B/P3H2/VTN/PAM/PRG4/PKD1/FCER2/CD69/P3H3/GALNT15/MRC1/SELE/REG4/EVA1C/REG1A/KLRB1/SIGLEC6/GALNT16/CHI3L2/PLOD2/CLEC1A/CLEC17A/OLR1/NPTX2/SIGLEC1/LGALS4/SLC2A3/H6PD/CD207/PTX3/P4HA3/FCN1/CLC/HLA-DRA/CLEC2D/CRYBG3/CD209/SI/FREM1/PLA2R1/SIGLEC10/KLRG1/HLA-DRB…
MF	GO:0003955	NAD(P)H dehydrogenase (quinone) activity	41	-0.685941	-2.11283	2.57879e-06	3.12466e-05	1.86684e-05	5694	tags=88%, list=29%, signal=63%	CBR4/NQO1/NDUFB7/NDUFC2/NDUFA13/NDUFB1/NDUFA4/NDUFA5/NQO2/NDUFAF2/NDUFB5/NDUFV2/NDUFA2/NDUFB10/NDUFA7/NDUFS5/NDUFS1/NDUFS8/NDUFS7/NDUFB2/NDUFB6/NDUFC1/NDUFA12/NDUFB4/NDUFA10/NDUFA1/NDUFA9/NDUFA8/NDUFAB1/NDUFA6/NDUFS3/NDUFB9/NDUFS2/NDUFB3/NDUFV1/NDUFS6
MF	GO:0001664	G protein-coupled receptor binding	277	0.508445	1.6315	2.62502e-06	3.17592e-05	1.89746e-05	3291	tags=31%, list=17%, signal=27%	CCL19/CCL21/SFRP1/FLNA/RSPO3/CXCL12/GNAO1/S1PR1/C3/MYOC/ROR2/PALM/CCL11/PTGER1/CCL2/CNRIP1/AGT/PTCH2/UCHL1/CXCL14/TFF2/CTHRC1/CXCL13/WLS/REEP1/FZD7/REEP2/WNT9A/EDNRB/GNAI1/PRNP/ADRA2A/EDN1/CLIC6/GHRL/AGTR1/WNT2B/DLG4/GNAL/FZD1/GPRASP2/GNA14/FYN/CX3CL1/PTCH1/AVPR1A/GNAZ/CCL22/RSPO1/TUB/GPRC5B/TAC1/ADCYAP1/CCL14/PENK/SLC9A3R2/MAGI2/ARRDC3/FCN1/GNAI2/NPY/HSPA1A/PDE4D/CCL23/NES/CCR2/NPW/CCL5/PNOC/S1P…
BP	GO:0001837	epithelial to mesenchymal transition	141	0.573465	1.76641	2.70293e-06	3.2653e-05	1.95087e-05	2589	tags=35%, list=13%, signal=30%	SFRP2/GREM1/SFRP1/FLNA/FERMT2/DACT3/TGFB1I1/HEYL/WWTR1/FGFR1/EPHA3/FOXF2/TMEM100/TGFB3/PHLDB2/DAB2/ISL1/TGFB1/TGFBR2/ENG/TGFBR3/COL1A1/LDLRAD4/GLIPR2/PHLDB1/VASN/PDPN/OLFM1/SNAI2/LEF1/HGF/RGCC/TWIST1/NOTCH4/SPRY1/TGFBR1/GATA3/TGFB2/FUZ/TIAM1/HEY2/SMAD7/PBLD/AKNA/ACVR1/RTN4/NOG/HAS2/EOMES
BP	GO:0061138	morphogenesis of a branching epithelium	171	0.560051	1.7505	2.75203e-06	3.31966e-05	1.98334e-05	2541	tags=35%, list=13%, signal=30%	SFRP2/GREM1/SFRP1/RSPO3/FGF7/FOXF1/TNC/SLIT2/SULF1/CCL11/EDNRA/CLIC4/GPC3/SIX2/AGT/PKD2/DCHS1/TCF21/FGF10/GLI3/FGF2/NTN4/TIE1/FAT4/TGFBR2/PBX1/ENG/NFATC4/SEMA3C/SMO/GLI2/EDN1/HOXA5/RASIP1/WNT2B/NRP1/LEF1/PKD1/HGF/HHIP/RSPO2/PTCH1/BCL2/NOTCH4/SPRY1/KDR/FOXC2/COL4A1/AR/TGM2/SEMA3E/SEMA3A/PLXND1/CSF1/ACVR1/PGR/SOX8/MMP14/NOG
BP	GO:0006334	nucleosome assembly	70	-0.584505	-2.01775	2.75739e-06	3.32118e-05	1.98425e-05	3249	tags=51%, list=16%, signal=43%	SART3/BRD2/RBBP4/RBBP7/NAP1L4/MIS18BP1/IPO4/HIRA/DAXX/ITGB3BP/HAT1/ANP32B/CENPL/CENPK/CENPQ/NASP/CENPI/RUVBL1/SOX9/NPM1/SET/CENPO/CHAF1A/HMGB2/CENPN/CHAF1B/CENPH/CENPW/CENPU/MIS18A/OIP5/CENPM/HJURP/CENPA/MCM2/ASF1B
BP	GO:0060048	cardiac muscle contraction	126	0.592861	1.80053	2.79313e-06	3.35923e-05	2.00698e-05	2306	tags=31%, list=12%, signal=28%	PLN/FLNA/CASQ2/CAV1/ATP1A2/KCNE4/KCNJ8/RGS2/GSN/TPM1/CACNA2D1/CXCR4/DMD/ACTC1/ANK2/CLIC2/GJA1/CACNA1C/KCNH2/CHGA/SCN4B/KCND3/EHD3/GJC1/CACNB2/PDE4B/GJA5/SCN1B/KCNA5/PIK3CG/SLC8A1/VEGFB/STC1/KCNE2/GSTM2/SNTA1/PDE4D/SMAD7/CTNNA3
BP	GO:0007162	negative regulation of cell adhesion	267	0.516483	1.65609	2.84816e-06	3.42033e-05	2.04349e-05	2801	tags=33%, list=14%, signal=28%	APOD/FBLN1/CCL21/CYP1B1/THBS1/SPOCK1/FGL2/CXCL12/JAM3/TNC/LRRC32/MYOC/DUSP1/FAM107A/SERPINE2/GPNMB/PHLDB2/DLC1/DTX1/PRKG1/MYADM/GLI3/TGFB1/LRP1/C1QTNF1/LGALS1/FZD7/FZD4/RDX/COL1A1/SERPINE1/POSTN/PRNP/PTPRC/TGFBI/PLXNA4/SEMA6A/ACVRL1/BMP6/SNAI2/ARHGDIB/LAPTM5/PLXNC1/RGCC/ARHGAP6/TWSG1/CX3CL1/NOTCH4/SPN/VSIG4/BCL6/ANGPT1/JAK3/PLA2G2D/SWAP70/CORO2B/SEMA3E/LAX1/SEMA5A/PIK3R1/ADIPOQ/PLXNB3/LPXN/DUSP3/…
BP	GO:0010811	positive regulation of cell-substrate adhesion	118	0.601505	1.81814	2.85921e-06	3.42851e-05	2.04837e-05	1653	tags=30%, list=8%, signal=27%	CCDC80/CCL21/SFRP1/FLNA/COL8A1/FBLN2/LIMS2/EMILIN1/FERMT2/FOXF1/PTN/MYOC/EFEMP2/FN1/ECM2/NID1/CCR7/THY1/MYADM/TEK/CD36/SPOCK2/ITGA5/COL16A1/EDIL3/UTRN/NDNF/RRAS/NRP1/CX3CL1/ILK/NEDD9/KDR/CD3E/PREX1
BP	GO:0001952	regulation of cell-matrix adhesion	119	0.593713	1.79562	2.86577e-06	3.4313e-05	2.05004e-05	2585	tags=38%, list=13%, signal=33%	APOD/GREM1/CCL21/SFRP1/THBS1/FERMT2/MYOC/FAM107A/EPHA3/EFEMP2/PHLDB2/DLC1/CCR7/THY1/TEK/CD36/COL16A1/LRP1/UTRN/SERPINE1/POSTN/RRAS/VCL/ACVRL1/NRP1/GPM6B/MACF1/ARHGAP6/CX3CL1/BCL2/BST1/BCL6/KDR/CD3E/SEMA3E/LIMCH1/PIK3R1/PEAK1/DUSP3/EFNA5/CSF1/DAPK3/MMP14/PLEKHA2/PPM1F
MF	GO:0005516	calmodulin binding	197	0.536052	1.68958	2.87215e-06	3.43386e-05	2.05157e-05	3361	tags=29%, list=17%, signal=24%	MYH11/CNN1/MYLK/CALD1/AKAP12/AEBP1/GEM/NGFR/RRAD/ATP2B4/RGS2/ITPKB/PDE1A/CACNA1C/RGS4/MYH10/MAP6/REM1/CAMK1D/RGS1/CNN3/PDE1B/PNCK/VAMP2/KCNN3/MYO5A/GAP43/SLC8A1/PCP4/RASGRF2/PHKG1/MAP2/MYO1F/DAPK1/SNTA1/NOS3/SLC8A2/EGFR/CAMK2G/PPP3CB/RYR2/MYO9B/ADD1/MYO1G/PDE1C/MARCKS/PLCB1/FAS/CAMK4/KCNQ4/CAMK1/FBXL2/MYO1C/KCNN4/MYH9/RYR3/PPP3CC
MF	GO:0017056	structural constituent of nuclear pore	26	-0.765127	-2.17316	2.91491e-06	3.47984e-05	2.07904e-05	3570	tags=77%, list=18%, signal=63%	NUP133/NUP153/POM121/NUP93/NUP62/NUP98/POM121C/NUP88/NUP160/NUP54/NUP107/UPF3B/NUP62CL/NUP155/NUTF2/NUP85/NUP35/NUP188/NUP205/NDC1
BP	GO:0010927	cellular component assembly involved in morphogenesis	96	0.627116	1.85723	2.97903e-06	3.55114e-05	2.12164e-05	2199	tags=27%, list=11%, signal=24%	MYH11/LMOD1/PGM5/CSRP1/CFL2/TMOD1/CNTNAP1/PMP22/LDB3/PDGFRB/PDGFRA/PHLDB2/TPM1/ACTC1/PHLDB1/EDN1/CSRP2/CCDC136/OBSL1/MEF2A/EPB41L3/ACTN2/TMOD2/TENM4/FHOD3/CASQ1
BP	GO:1904356	regulation of telomere maintenance via telomere lengthening	58	-0.615202	-2.07691	3.05498e-06	3.63035e-05	2.16897e-05	3737	tags=47%, list=19%, signal=38%	NAF1/MAPKAPK5/EXOSC10/ACD/SRC/PINX1/XRCC5/SMG5/HNRNPU/HNRNPC/HNRNPA1/PIF1/PARP1/MAPK15/HNRNPA2B1/CCT4/NAT10/CCT2/TCP1/CCT7/CCT3/CCT8/CCT5/CCT6A/DKC1/AURKB/NEK2
BP	GO:0001558	regulation of cell growth	384	0.480016	1.56651	3.0615e-06	3.63035e-05	2.16897e-05	2459	tags=23%, list=12%, signal=21%	SFRP2/FHL1/GREM1/SFRP1/CRYAB/FRZB/IGFBP5/PI16/IGFBP4/MAP1B/DACT3/IGFBP7/SLIT3/SPOCK1/CXCL12/MYOCD/NTN1/RERG/SLIT2/FAM107A/RGS2/FN1/SERPINE2/APBB1/AGT/CXCR4/LTBP4/PTCH2/NPR1/PTPRS/GJA1/EPHA7/TGFB1/SEMA3G/LRP1/WFDC1/RGS4/RASGRP2/SEMA3C/SOX17/EDN1/PLXNA4/L1CAM/AGTR1/SEMA6A/OLFM1/IGFBP3/ACVRL1/NRP1/INHBA/CRABP2/IGF1/TSPYL2/MACF1/SEMA6B/CLSTN3/DPYSL2/AKAP6/AVPR1A/EPB41L3/BCL2/REG1A/APOE/BCL6/SEMA6D/SE…
BP	GO:0034248	regulation of cellular amide metabolic process	399	-0.3327	-1.44256	3.06172e-06	3.63035e-05	2.16897e-05	4514	tags=44%, list=23%, signal=34%	POLDIP3/FXR1/AKT1/IFNG/ZCCHC4/RBM8A/UCN/TMED10/ABCA7/RPL30/DNAJC3/MTRF1/GSPT1/DDX39B/PASK/KLHL25/CNOT1/EIF2B4/COA3/TP53/METTL3/ORMDL2/DPH5/UPF1/PRKCD/PPP1R15B/TOB1/ELAVL1/CNOT6/NANOS3/EEFSEC/GEMIN5/RPL38/GSK3A/IGF2BP3/RMND1/EIF5/MAPKAPK5/IFNGR1/IREB2/FMR1/SPHK2/CNOT7/POLR2G/RPS4X/EIF2A/LSM14B/MRPS27/UQCC1/LARP4B/ORMDL3/PDP1/EIF2B2/BCL3/EIF3H/YTHDF2/PDK1/MPV17L2/PGAM1/MALSU1/MTG2/EIF2B5/CNOT3/PLEK…
BP	GO:0016441	posttranscriptional gene silencing	129	-0.467673	-1.82769	3.06439e-06	3.63035e-05	2.16897e-05	5033	tags=56%, list=26%, signal=42%	DGCR8/ZMPSTE24/TPR/ZC3H7B/HENMT1/MAP2K2/NUP214/FXR1/POLR2A/ADAR/POLR2C/LIMD1/POLR2K/CNOT1/TP53/METTL3/MAP2K1/ELAVL1/CNOT6/POLR2I/NUP133/FMR1/DROSHA/CNOT7/POLR2G/CLP1/NUP153/POM121/NUP93/POLR2E/POLR2B/EIF4E2/NUP62/NUP98/MYCN/POLR2J/SEC13/POM121C/NUP88/NUP160/NUP54/POLR2L/NUP107/NUP43/AAAS/AJUBA/AGO2/MOV10/TARBP2/PPARG/NUP155/POLR2D/DHX9/EIF6/NUP85/EIF4G1/TSN/NUP35/SEH1L/MRPL44/HNRNPA2B1/NUP50/SRRT…
BP	GO:0006165	nucleoside diphosphate phosphorylation	127	-0.475091	-1.86623	3.0679e-06	3.63035e-05	2.16897e-05	3629	tags=41%, list=18%, signal=34%	ADPGK/NUP133/NME2/PFKL/AK7/NME6/NUP153/PGAM1/POM121/CMPK1/NUP93/NUP62/NUP98/SEC13/POM121C/NUP88/NUP160/NUP54/FOXK2/NUP107/NUP43/AAAS/PFKFB4/HKDC1/GALK1/ALDOC/PFKP/NUP155/EIF6/NUP85/NUP35/SEH1L/MLXIPL/GIT1/NUP50/PFKFB2/RAE1/ALDOA/NUP188/NUP205/NUP37/LDHA/GPI/TPI1/PGK1/ENO1/GAPDH/DTYMK/PKM/NME1/NDC1/HK2
BP	GO:0003231	cardiac ventricle development	110	0.61137	1.82686	3.09181e-06	3.6533e-05	2.18268e-05	2541	tags=32%, list=13%, signal=28%	SFRP2/CPE/HAND2/FOXF1/SLIT3/MYOCD/HEYL/SLIT2/HEG1/MEF2C/TPM1/PDE2A/ROBO1/ISL1/TGFB1/TGFBR2/ENG/TGFBR3/SEMA3C/ZFPM2/SMARCD3/CITED2/GJA5/LMO4/FOXC2/KCNK2/TGFBR1/BMPR2/GATA3/TGFB2/HEY2/SMAD7/ACVR1/RYR2/NOG
BP	GO:2001257	regulation of cation channel activity	164	0.562631	1.75029	3.11425e-06	3.67446e-05	2.19532e-05	4425	tags=41%, list=22%, signal=32%	PLN/JPH2/CASQ2/GEM/CAV1/RRAD/KCNE4/MEF2C/CCL2/CACNA2D1/PKD2/DMD/ANK2/STOM/CLIC2/AHNAK/NLGN2/REM1/EHD3/CACNB2/PDE4B/DLG4/TREM2/VAMP2/SCN1B/AKAP6/RGS9/CACNG4/KCNE2/ADRB2/ACTN2/RASGRF2/PLCG2/AMIGO1/NLGN3/GSTM2/DAPK1/PDE4D/CASQ1/CCR2/PINK1/ITGB1/SLMAP/PRRT1/GRIN2A/TMSB4X/KCNAB1/STAC/GNB5/CACNB3/KLHL24/KCNG1/KCNA1/FGF14/RELN/DLG2/NLGN1/SHISA8/KCNIP2/ARC/DRD4/PIRT/CNIH3/STIM1/HRC/CRHBP/PPARGC1A/LRRC55
BP	GO:0051056	regulation of small GTPase mediated signal transduction	310	0.497152	1.60573	3.13149e-06	3.68942e-05	2.20425e-05	3406	tags=37%, list=17%, signal=31%	A2M/TIMP2/KANK2/ARHGEF25/COL3A1/MYOC/SLIT2/RHOJ/HEG1/PDGFRB/ARHGEF26/LPAR1/PSD/DLC1/SYDE1/ITPKB/CGNL1/RHOB/F2R/ARHGEF17/FGF10/F2RL3/ROBO1/ARHGEF6/ARHGAP31/ARHGAP23/RDX/F2RL2/P2RY8/RASIP1/ARHGAP24/CDON/TAGAP/NRP1/P2RY10/ARHGDIB/IGF1/CHN1/RHOQ/MAPRE2/ABCA1/ARHGAP6/CYTH3/ARHGAP30/PIK3CG/ARHGAP10/ARHGAP25/APOE/RASAL3/KCTD10/ARHGAP15/SPRY1/BCL6/FAM13B/IRS2/RASA3/ARHGAP29/STARD8/LPAR6/PREX1/STARD13/ARH…
MF	GO:0034062	5'-3' RNA polymerase activity	38	-0.691054	-2.12434	3.16327e-06	3.71603e-05	2.22016e-05	4992	tags=76%, list=25%, signal=57%	POLR3E/TRNT1/POLR3D/POLR3F/POLR2A/POLR2C/POLR2K/POLR3B/RPAP1/POLR2I/POLR3H/POLR2G/POLR1D/POLR3A/POLR1E/POLR2E/POLR2B/POLR2J/MED20/POLR2L/POLR1A/POLR2D/POLRMT/POLR3G/POLR3K/POLR1B/PRIM1/POLR2H/POLR1C
MF	GO:0097747	RNA polymerase activity	38	-0.691054	-2.12434	3.16327e-06	3.71603e-05	2.22016e-05	4992	tags=76%, list=25%, signal=57%	POLR3E/TRNT1/POLR3D/POLR3F/POLR2A/POLR2C/POLR2K/POLR3B/RPAP1/POLR2I/POLR3H/POLR2G/POLR1D/POLR3A/POLR1E/POLR2E/POLR2B/POLR2J/MED20/POLR2L/POLR1A/POLR2D/POLRMT/POLR3G/POLR3K/POLR1B/PRIM1/POLR2H/POLR1C
BP	GO:1903706	regulation of hemopoiesis	373	0.479262	1.56306	3.20471e-06	3.75926e-05	2.24598e-05	3312	tags=35%, list=17%, signal=29%	CCL19/MYL9/SFRP1/THBS1/PTN/FGL2/FBN1/ROR2/FAXDC2/RASSF2/AXL/LTF/PRKCB/MEF2C/TOX/ITPKB/DTX1/EVI2B/NR4A3/MAFB/GLI3/ZBTB16/MEIS1/IL34/CARTPT/TGFB1/LRRC17/TGFBR2/EGR3/GAS6/PTPRC/CD27/GLI2/HOXA5/ETS1/HCLS1/GPR68/FSTL3/SASH3/IL7R/MITF/LEF1/TYROBP/TREM2/INHBA/LOX/NCKAP1L/MTURN/ZFP36/TLR4/HLA-DOA/BTK/CD4/KAT2B/BCL6/CD2/CARD11/KLF10/JAK3/TNRC6C/STAT5B/SPINK5/GATA3/CD28/NOTCH2/FES/ZMIZ1/C1QC/SPI1/TESPA1/JU…
CC	GO:0042788	polysomal ribosome	32	-0.718028	-2.13361	3.21585e-06	3.76687e-05	2.25053e-05	4799	tags=81%, list=24%, signal=62%	RPL31/RPS29/NUFIP2/BTF3/RPL6/RPS28/RPL30/RPL36/RPL32/RPL41/RPL38/FMR1/RPL18A/RPS26/LARP4B/EIF3H/RPL24/RPL36A/RPL19/RPS21/LARP1/RPL7A/RPL18/DHX9/PNPT1/RPL8
BP	GO:0042310	vasoconstriction	78	0.652273	1.88603	3.2523e-06	3.80406e-05	2.27275e-05	3213	tags=42%, list=16%, signal=36%	ACTA2/CAV1/ATP1A2/COMP/EDNRA/AGT/F2R/GJA1/EDNRB/ADRA2A/EDN1/AGTR1/GJA5/AVPR1A/KCNA5/P2RX1/HTR2B/TBXA2R/SLC8A1/BMPR2/HTR2A/PTAFR/HRH2/AVPR2/SNTA1/SCNN1B/EGFR/DOCK4/CD38/ECE1/ADRA1D/BDKRB2/HTR1B
BP	GO:0090502	RNA phosphodiester bond hydrolysis, endonucleolytic	75	-0.56278	-2.00171	3.36675e-06	3.93225e-05	2.34933e-05	3453	tags=49%, list=18%, signal=41%	RPP38/DROSHA/NOP9/POP5/UTP20/RCL1/ELAC2/DBR1/LACTB2/RPP21/BMS1/POP4/PIWIL1/TSEN34/TSR1/SND1/RPS21/AGO2/APEX1/ABT1/CPSF3/TBL3/NOB1/RPP40/TSN/MRPL44/POP1/NOP14/ENDOG/POP7/RPP25/RRS1/BOP1/RNASEH2A/EXO1/ZC3H12A/FEN1
MF	GO:0003724	RNA helicase activity	74	-0.575282	-2.03558	3.3867e-06	3.94883e-05	2.35924e-05	4262	tags=50%, list=22%, signal=39%	DDX39B/AQR/UPF1/DDX20/DDX51/SKIV2L/DDX27/FANCM/DHX16/G3BP1/DDX41/DDX52/DDX55/DDX10/RAD54B/DHX33/DDX23/DHX37/HELZ2/DHX30/DHX34/SNRNP200/MOV10/DDX28/SUPV3L1/DDX18/DDX49/DHX9/DDX1/DDX31/DDX56/DDX54/DHX15/BRIP1/EIF4A3/DDX21/DDX39A
BP	GO:0010522	regulation of calcium ion transport into cytosol	92	0.637861	1.8792	3.39071e-06	3.94883e-05	2.35924e-05	2256	tags=35%, list=11%, signal=31%	PLN/JPH2/CASQ2/CAV1/ATP1A2/RAMP3/APLNR/PKD2/DMD/THY1/ANK2/CLIC2/F2R/F2RL3/CACNA1C/PRNP/TRPC1/GPER1/FYN/CX3CL1/AKAP6/BCL2/CD19/CD4/SLC8A1/CORO1A/P2RX7/GSTM2/BDKRB1/PDE4D/CASQ1/SNCA
BP	GO:0048546	digestive tract morphogenesis	43	0.748115	2.01615	3.42052e-06	3.97783e-05	2.37657e-05	1954	tags=37%, list=10%, signal=34%	SFRP2/SFRP1/RBPMS2/FOXF1/DACT1/PDGFRA/SIX2/TCF21/GLI1/FGF10/GLI3/SOX17/GLI2/BCL2/NKX2-3/SFRP5
MF	GO:0008408	3'-5' exonuclease activity	52	-0.634878	-2.05863	3.43599e-06	3.99009e-05	2.38389e-05	4281	tags=67%, list=22%, signal=53%	USB1/EXD2/DIS3L2/POLG/DIS3L/EXD3/ANGEL1/CNOT1/ERI3/RAD1/CNOT6/TOE1/WRN/DIS3/CNOT7/EXOSC10/XRN2/ERI2/TATDN1/RAD9A/ERI1/PDE12/APEX2/EXOSC3/ISG20L2/APEX1/EXOSC7/EXOSC9/EXOSC2/EXOSC5/POLE/REXO4/PNPT1/EXOSC4/POLD1
CC	GO:0022625	cytosolic large ribosomal subunit	55	-0.623158	-2.06083	3.4901e-06	4.04712e-05	2.41797e-05	6190	tags=75%, list=31%, signal=51%	RPL10A/RPL15/RPL23/RPLP1/RPL27A/RPL39/RPL28/RPL17/RPL37/RPL5/RPL31/RPL3/RPL6/RPL9/RPL30/RPL36/RPL4/RPL35A/RPL32/RPL41/RSL24D1/RPL38/RPL23A/RPL18A/RPL24/RPLP2/RPL37A/RPL36A/RPL19/RPL35/MRPL1/RPL7/RPL14/RPL7A/RPL29/RPLP0/RPL18/RPL26L1/RPL12/RPL7L1/RPL8
CC	GO:0005747	mitochondrial respiratory chain complex I	42	-0.68262	-2.12819	3.58178e-06	4.13565e-05	2.47086e-05	5631	tags=81%, list=29%, signal=58%	NDUFB7/NDUFC2/NDUFA13/NDUFB1/NDUFA4/NDUFA5/NDUFB5/NDUFV2/NDUFA2/NDUFB10/NDUFA7/NDUFB11/NDUFS5/NDUFS1/NDUFS8/NDUFS7/NDUFB2/NDUFB6/NDUFC1/NDUFA12/NDUFB4/NDUFA10/NDUFA1/NDUFA9/NDUFA8/NDUFAB1/NDUFA6/NDUFS3/NDUFB9/NDUFS2/NDUFB3/NDUFV1/FOXRED1/NDUFS6
CC	GO:0030964	NADH dehydrogenase complex	42	-0.68262	-2.12819	3.58178e-06	4.13565e-05	2.47086e-05	5631	tags=81%, list=29%, signal=58%	NDUFB7/NDUFC2/NDUFA13/NDUFB1/NDUFA4/NDUFA5/NDUFB5/NDUFV2/NDUFA2/NDUFB10/NDUFA7/NDUFB11/NDUFS5/NDUFS1/NDUFS8/NDUFS7/NDUFB2/NDUFB6/NDUFC1/NDUFA12/NDUFB4/NDUFA10/NDUFA1/NDUFA9/NDUFA8/NDUFAB1/NDUFA6/NDUFS3/NDUFB9/NDUFS2/NDUFB3/NDUFV1/FOXRED1/NDUFS6
CC	GO:0045271	respiratory chain complex I	42	-0.68262	-2.12819	3.58178e-06	4.13565e-05	2.47086e-05	5631	tags=81%, list=29%, signal=58%	NDUFB7/NDUFC2/NDUFA13/NDUFB1/NDUFA4/NDUFA5/NDUFB5/NDUFV2/NDUFA2/NDUFB10/NDUFA7/NDUFB11/NDUFS5/NDUFS1/NDUFS8/NDUFS7/NDUFB2/NDUFB6/NDUFC1/NDUFA12/NDUFB4/NDUFA10/NDUFA1/NDUFA9/NDUFA8/NDUFAB1/NDUFA6/NDUFS3/NDUFB9/NDUFS2/NDUFB3/NDUFV1/FOXRED1/NDUFS6
BP	GO:0050866	negative regulation of cell activation	187	0.546338	1.71595	3.64078e-06	4.18632e-05	2.50113e-05	3874	tags=45%, list=20%, signal=37%	SFRP1/EMILIN1/FOXF1/FGL2/LRRC32/SYT11/AXL/SERPINE2/PDGFRA/GPNMB/THBD/DTX1/PRKG1/GLI3/CD200/C1QTNF1/PRNP/PTPRC/MILR1/CNR1/BANK1/TYROBP/LAPTM5/INHBA/BLK/GPER1/TWSG1/CX3CL1/BTK/APOE/SPN/VSIG4/CD84/MNDA/BCL6/JAK3/PLA2G2D/CST7/LST1/LAX1/SAMSN1/DUSP3/NOS3/MERTK/CD74/TBC1D10C/TNFAIP8L2/TNFRSF13B/CCR2/ANXA1/SH2B3/FCGR2B/SMAD7/FGR/CNR2/CR1/HLA-DRB1/PDCD1LG2/IL4R/CD86/SOCS5/INPP5D/HLX/TNFSF4/ATM/SFTPD/HAVC…
BP	GO:0048662	negative regulation of smooth muscle cell proliferation	42	0.748302	2.00784	3.64408e-06	4.18632e-05	2.50113e-05	2121	tags=45%, list=11%, signal=40%	CNN1/APOD/OGN/IGFBP5/MYOCD/VIP/EFEMP2/MEF2C/TGFB3/TPM1/NPR1/PRKG1/IGFBP3/AIF1/GPER1/PTGIR/ADIPOQ/NDRG2/NPR3
MF	GO:0000049	tRNA binding	55	-0.622684	-2.05926	3.64436e-06	4.18632e-05	2.50113e-05	5037	tags=64%, list=26%, signal=48%	NSUN6/DTD1/TRNT1/SARS2/ELP3/RPL35A/EEFSEC/METTL1/EIF2A/MRPS27/TRMT10A/PTCD1/DTD2/CTU1/EARS2/CTU2/AIMP1/EIF2S3/TRMT11/XPOT/SSB/TRMU/YARS2/TRMT1/AARS2/HSD17B10/PUS1/TRMT10C/YRDC/NSUN2/NAT10/FARSA/IARS2/XPO5/DARS2
BP	GO:0032412	regulation of ion transmembrane transporter activity	240	0.520246	1.66591	3.64771e-06	4.18632e-05	2.50113e-05	3753	tags=34%, list=19%, signal=28%	PLN/FHL1/JPH2/CASQ2/GEM/FXYD6/CAV1/RRAD/ATP1A2/KCNE4/MEF2C/CCL2/CACNA2D1/PKD2/DMD/ANK2/STOM/ATP1B2/CLIC2/HSPA2/UTRN/AHNAK/NLGN2/SCN4B/REM1/PRNP/ADRA2A/EHD3/ABCB1/CACNB2/PDE4B/DLG4/TREM2/FXYD1/VAMP2/SCN1B/AKAP6/RGS9/CACNG4/KCNE2/ADRB2/ACTN2/RASGRF2/PLCG2/PTAFR/AMIGO1/NLGN3/GSTM2/DAPK1/PDE4D/CASQ1/CCR2/PINK1/ITGB1/SLMAP/PRRT1/RYR2/GRIN2A/HECW2/OSR1/RGN/TMSB4X/TRPC6/KCNAB1/STAC/GNB5/CACNB3/TESC/NEDD…
BP	GO:0006909	phagocytosis	263	0.516012	1.65079	3.65153e-06	4.18632e-05	2.50113e-05	3417	tags=38%, list=17%, signal=32%	SRPX/THBS1/C3/SYT11/PECAM1/AXL/RAB31/GSN/CCL2/C4A/COLEC12/C4B/CD36/WIPF1/IGLL5/CD93/LRP1/MFGE8/RAB34/CD302/LEPR/CAMK1D/GAS6/PTPRC/ELMO1/PEAR1/TYROBP/TREM2/AIF1/NCKAP1L/FYN/CYFIP2/PLD4/ITGAM/DYSF/WAS/TLR4/ITGAL/PLA2G5/ITGB3/ARHGAP25/DOCK2/TUB/STAP1/MSR1/CORO1A/TGM2/IL2RG/PLCG2/PIP5K1C/NCF4/ITGB2/PIK3R1/ADIPOQ/RHOBTB1/GULP1/PTX3/RHOH/FCN1/RAP1A/CD14/RAB7B/APOA1/MERTK/ITGAV/BIN2/VAV1/ANXA1/FCGR2B/GA…
CC	GO:0043202	lysosomal lumen	93	0.623118	1.83692	3.67588e-06	4.20828e-05	2.51425e-05	3310	tags=37%, list=17%, signal=31%	OGN/PRELP/DCN/LUM/OMD/FMOD/BGN/CTSK/CTSF/VCAN/PDGFRB/GPC3/SDC2/CSPG4/GPC6/EPDR1/HSPG2/TCN2/SDC3/GC/IDS/ARSB/SMPD1/CD1E/CD74/PSAP/LIPA/CTSL/GM2A/KERA/GYG1/APOB/PLD3/IDUA
BP	GO:0007229	integrin-mediated signaling pathway	100	0.6211	1.84571	3.68594e-06	4.20964e-05	2.51506e-05	2853	tags=44%, list=14%, signal=38%	FLNA/LIMS2/FERMT2/PTN/ADAMTS1/ITGA7/COL3A1/ITGA9/ITGA8/ITGBL1/FN1/ITGA1/THY1/ITGA5/TIMP1/COL16A1/ITGA11/PRKD1/TLN1/DST/NRP1/MADCAM1/ILK/ITGAM/ITGAL/ITGB3/NEDD9/BST1/ITGA4/CD40LG/ITGB2/ZYX/ITGAX/APOA1/ITGAV/VAV1/ITGB1/PLEK/FGR/FERMT3/SEMA7A/ITGB5/ABL1/PRAM1
BP	GO:0001649	osteoblast differentiation	200	0.540678	1.70412	3.68746e-06	4.20964e-05	2.51506e-05	2618	tags=33%, list=13%, signal=29%	SFRP2/GREM1/SFRP1/HAND2/IGFBP5/DDR2/FERMT2/TMEM119/TNC/WWTR1/MYOC/RASSF2/TWIST2/VCAN/LTF/IGF2/MEF2C/PDLIM7/MRC2/GLI1/CTHRC1/GLI3/VEGFC/IL6ST/COL1A1/COL6A1/SMO/ITGA11/GLI2/PRKD1/IGFBP3/BMP6/SNAI2/LEF1/IGF1/LOX/FZD1/HGF/BMP3/CHRD/TNN/TWSG1/TWIST1/RSPO2/PTCH1/TP53INP2/GDF10/ALPL/ID3/HOXA2/PTHLH/BMPR2/CRIM1/BMPR1B/PENK/IL6R/NPPC/MEF2D/PTH1R/ACVR1/SKI/FHL2/SOX8/NOG/LRP3/SEMA7A
MF	GO:0003954	NADH dehydrogenase activity	38	-0.687836	-2.11445	3.78834e-06	4.30658e-05	2.57298e-05	5631	tags=87%, list=29%, signal=62%	NDUFB7/NDUFC2/NDUFA13/NDUFB1/NDUFA4/NDUFA5/NDUFAF2/NDUFB5/NDUFV2/NDUFA2/NDUFB10/NDUFA7/NDUFS5/NDUFS1/NDUFS8/NDUFS7/NDUFB2/NDUFB6/NDUFC1/NDUFA12/NDUFB4/NDUFA10/NDUFA1/NDUFA9/NDUFA8/NDUFAB1/NDUFA6/NDUFS3/NDUFB9/NDUFS2/NDUFB3/NDUFV1/NDUFS6
MF	GO:0008137	NADH dehydrogenase (ubiquinone) activity	38	-0.687836	-2.11445	3.78834e-06	4.30658e-05	2.57298e-05	5631	tags=87%, list=29%, signal=62%	NDUFB7/NDUFC2/NDUFA13/NDUFB1/NDUFA4/NDUFA5/NDUFAF2/NDUFB5/NDUFV2/NDUFA2/NDUFB10/NDUFA7/NDUFS5/NDUFS1/NDUFS8/NDUFS7/NDUFB2/NDUFB6/NDUFC1/NDUFA12/NDUFB4/NDUFA10/NDUFA1/NDUFA9/NDUFA8/NDUFAB1/NDUFA6/NDUFS3/NDUFB9/NDUFS2/NDUFB3/NDUFV1/NDUFS6
MF	GO:0050136	NADH dehydrogenase (quinone) activity	38	-0.687836	-2.11445	3.78834e-06	4.30658e-05	2.57298e-05	5631	tags=87%, list=29%, signal=62%	NDUFB7/NDUFC2/NDUFA13/NDUFB1/NDUFA4/NDUFA5/NDUFAF2/NDUFB5/NDUFV2/NDUFA2/NDUFB10/NDUFA7/NDUFS5/NDUFS1/NDUFS8/NDUFS7/NDUFB2/NDUFB6/NDUFC1/NDUFA12/NDUFB4/NDUFA10/NDUFA1/NDUFA9/NDUFA8/NDUFAB1/NDUFA6/NDUFS3/NDUFB9/NDUFS2/NDUFB3/NDUFV1/NDUFS6
BP	GO:0000083	regulation of transcription involved in G1/S transition of mitotic cell cycle	34	-0.7108	-2.12263	3.8248e-06	4.34193e-05	2.5941e-05	2100	tags=53%, list=11%, signal=47%	ZPR1/POLA1/E2F4/CDK5/DHFR/FBXO5/CDK16/TFDP1/E2F7/PCNA/ORC1/CDC45/E2F1/TYMS/CCNE1/CDC6/CDT1/RRM2
MF	GO:0004896	cytokine receptor activity	97	0.627733	1.86062	3.85425e-06	4.36923e-05	2.61042e-05	4168	tags=53%, list=21%, signal=42%	GFRA1/IL1R1/CXCR4/CCR7/CSF2RB/IL6ST/GHR/FZD4/CRLF1/LEPR/IL10RA/IL3RA/ACKR3/IL7R/LIFR/CX3CR1/CCR4/OSMR/CD4/IL2RG/CMKLR1/IL6R/EBI3/CD74/CCR2/CCR5/CNTFR/XCR1/IL4R/IL11RA/CD44/GPR17/F3/CXCR3/GFRA3/IL17RD/CCR1/IL1RL1/CCR10/IL2RB/GFRA2/FLT3/ACKR4/CXCR5/IL18R1/CCR8/IL12RB1/CRLF2/CSF3R/IFNAR2/CCRL2
BP	GO:0010498	proteasomal protein catabolic process	465	-0.326458	-1.41858	3.86964e-06	4.38054e-05	2.61717e-05	4530	tags=38%, list=23%, signal=30%	SHH/UBE2A/RNF34/AKT1/ZFAND2B/EDEM2/AGAP3/RHBDD2/FAF2/UGGT1/NSFL1C/RBX1/DCAF11/UBE4A/BAG5/TMEM259/RNF5/PLAA/PSME4/SVIP/PITHD1/RCHY1/UBXN11/GET4/SH3RF2/PARK7/RNF19B/RNF40/PSMD4/DERL1/CUL1/GSK3B/MAN1B1/PCBP2/SHARPIN/SEC61B/EDEM3/RNFT1/PSMD6/GSK3A/ANAPC7/MTA1/USP5/FBXO22/FBXO6/SIRT6/FMR1/ANKZF1/UBQLN1/FBXL16/RMND5A/UBE2V2/TAF9/SOCS6/NKD2/PSMD10/FBXL14/DESI1/PSMD7/TBL1XR1/RBCK1/PSMF1/AREL1/PSMC1/PSMB6…
BP	GO:0035194	post-transcriptional gene silencing by RNA	126	-0.469797	-1.83358	3.87693e-06	4.38267e-05	2.61844e-05	5033	tags=57%, list=26%, signal=43%	DGCR8/ZMPSTE24/TPR/ZC3H7B/HENMT1/MAP2K2/NUP214/FXR1/POLR2A/ADAR/POLR2C/LIMD1/POLR2K/CNOT1/TP53/METTL3/MAP2K1/ELAVL1/CNOT6/POLR2I/NUP133/FMR1/DROSHA/CNOT7/POLR2G/CLP1/NUP153/POM121/NUP93/POLR2E/POLR2B/EIF4E2/NUP62/NUP98/MYCN/POLR2J/SEC13/POM121C/NUP88/NUP160/NUP54/POLR2L/NUP107/NUP43/AAAS/AJUBA/AGO2/MOV10/TARBP2/PPARG/NUP155/POLR2D/DHX9/EIF6/NUP85/EIF4G1/TSN/NUP35/SEH1L/MRPL44/HNRNPA2B1/NUP50/SRRT…
BP	GO:1901605	alpha-amino acid metabolic process	175	-0.429794	-1.74098	3.94525e-06	4.45367e-05	2.66086e-05	3402	tags=35%, list=17%, signal=30%	ILVBL/ADI1/SLC39A8/NIT2/CTPS2/SERINC5/SEPHS1/MTHFD2L/GSTZ1/PEMT/GCLM/QDPR/MTAP/PYCR2/AASDHPPT/GLDC/FPGS/AFMID/SHMT1/THAP4/AZIN1/ALDH4A1/DLD/PFAS/GAD1/GCSH/ASL/ASNS/IDO1/ALDH18A1/GART/SMS/NOS2/CTPS1/PCBD1/GOT2/HSD17B10/MPST/PLOD3/GFPT1/CTH/DDAH1/CAD/AGMAT/PSPH/GMPS/DHFR/TST/ENOPH1/GOT1/SLC7A11/HNF4A/GCAT/GPT2/ODC1/MTHFD1/AHCY/PPAT/ASS1/SHMT2/PYCR1/PSAT1
BP	GO:0043038	amino acid activation	30	-0.731942	-2.14393	3.96524e-06	4.47001e-05	2.67063e-05	4770	tags=87%, list=24%, signal=66%	SARS2/CARS2/HARS2/GATB/DALRD3/WARS2/GATC/PPA2/EARS2/AIMP1/QRSL1/VARS2/PARS2/TARS2/EEF1E1/YARS2/AARS2/PPA1/AIMP2/LARS2/NARS2/FARSB/FARSA/IARS2/MARS2/DARS2
BP	GO:0050863	regulation of T cell activation	315	0.492315	1.59132	4.08929e-06	4.60344e-05	2.75034e-05	3195	tags=37%, list=16%, signal=32%	CCL19/CCL21/FGL2/LRRC32/CAV1/IGF2/GPNMB/CCL2/TOX/ITPKB/DTX1/CCR7/THY1/VCAM1/GLI3/ZBTB16/IL6ST/LGALS1/TGFBR2/EGR3/PRNP/PTPRC/CD27/GLI2/SASH3/IL7R/HLA-DPB1/LEF1/LAPTM5/IGF1/AIF1/NCKAP1L/FYN/TWSG1/CD5/HLA-DPA1/HLA-DOA/CD4/SPN/VSIG4/RASAL3/DOCK8/TNFSF8/BCL6/CD2/CARD11/CD3E/TNFRSF13C/CD1D/MAPK8IP1/JAK3/STAT5B/PLA2G2D/CORO1A/SIT1/LMO1/SPINK5/TNFSF13B/GATA3/LAX1/CD28/ZMIZ1/TESPA1/CD40LG/PIK3R1/EBI3/DUSP…
BP	GO:0009132	nucleoside diphosphate metabolic process	151	-0.446871	-1.78099	4.13852e-06	4.65238e-05	2.77958e-05	3230	tags=36%, list=16%, signal=31%	PFKL/AK7/NME6/TJP2/NUP153/PGAM1/POM121/CMPK1/NUP93/NUP62/NUP98/SEC13/POM121C/NUP88/NUP160/NUP54/FOXK2/NUDT5/NUP107/NUP43/AAAS/PFKFB4/HKDC1/GALK1/ALDOC/PFKP/NUP155/EIF6/NUP85/NUP35/SEH1L/AK2/MLXIPL/GIT1/NUP50/PFKFB2/RAE1/ALDOA/ENTPD6/NUP188/NUP205/NUP37/ENTPD2/ENTPD8/LDHA/GPI/TPI1/PGK1/ENO1/GAPDH/DTYMK/PKM/NME1/NDC1/HK2
BP	GO:0051899	membrane depolarization	82	0.64436	1.87458	4.17504e-06	4.68693e-05	2.80022e-05	2358	tags=32%, list=12%, signal=28%	FHL1/DCN/CACNA1H/CAV1/ATP1A2/MYOC/CACNA2D1/ANK2/CACNA1C/KCNH2/SCN4B/EDN1/SCN7A/CACNB2/GJA5/LRRK2/SCN1B/BCL2/SLC8A1/KDR/CACNG4/MLLT11/P2RX7/JUN/SMAD7/SLMAP
BP	GO:0150116	regulation of cell-substrate junction organization	69	0.670031	1.91661	4.2455e-06	4.75943e-05	2.84354e-05	2585	tags=45%, list=13%, signal=39%	APOD/GREM1/SFRP1/THBS1/FERMT2/MYOC/FAM107A/EPHA3/PHLDB2/DLC1/THY1/TEK/COL16A1/LRP1/VCL/ACVRL1/NRP1/MAPRE2/GPM6B/MACF1/ARHGAP6/KDR/IQSEC1/LIMCH1/PIK3R1/PEAK1/DUSP3/EFNA5/DAPK3/MMP14/PPM1F
BP	GO:0051382	kinetochore assembly	15	-0.869139	-2.13987	4.31823e-06	4.83426e-05	2.88825e-05	980	tags=53%, list=5%, signal=51%	CENPK/CENPN/CENPH/CENPW/CENPE/DLGAP5/CENPA/CENPF
CC	GO:0034709	methylosome	12	-0.906853	-2.08384	4.37404e-06	4.88998e-05	2.92154e-05	1848	tags=100%, list=9%, signal=91%	SNRPD2/CLNS1A/PRMT1/WDR77/ERH/SNRPE/PRMT5/SNRPF/SNRPG/SNRPB/SNRPD1
MF	GO:0022836	gated channel activity	333	0.485629	1.57249	4.45403e-06	4.9678e-05	2.96803e-05	4238	tags=28%, list=21%, signal=23%	KCNMB1/KCNMA1/CACNA1H/ABCC9/GABRP/AQP1/KCNE4/ANXA6/CLIC4/KCNJ8/CACNA2D1/PKD2/NCS1/CLIC2/CACNA1C/ITPR1/KCNH2/GRIK5/CHRNA3/KCNK3/SCN4B/KCND3/CLIC6/SCN7A/CACNB2/CNR1/KCNS3/SNAP25/TTYH2/KCNN3/SCN1B/KCNA3/HVCN1/KCNA5/GLRB/P2RX1/CACNG4/RASA3/TMEM150C/CYBB/KCNE2/KCNK2/TMEM37/KCNB1/ANO5/P2RX7/GRID1/KCND1/TMC8/ITGAV/SCNN1B/ITPR2/NALCN/RYR2/GRIN2A/PIEZO2/KCNJ5/KCNT2/CACNA2D3/KCNQ4/KCNAB1/ANO1/CACNA2D2/KCNN…
BP	GO:0030308	negative regulation of cell growth	178	0.55292	1.73871	4.45592e-06	4.9678e-05	2.96803e-05	2185	tags=25%, list=11%, signal=23%	SFRP2/FHL1/GREM1/SFRP1/CRYAB/FRZB/PI16/DACT3/SLIT3/NTN1/RERG/SLIT2/RGS2/SERPINE2/APBB1/NPR1/PTPRS/GJA1/EPHA7/TGFB1/SEMA3G/WFDC1/RGS4/SEMA3C/SOX17/SEMA6A/ACVRL1/NRP1/INHBA/TSPYL2/SEMA6B/BCL2/BCL6/SEMA6D/SEMA6C/SEMA3E/BMPR2/TGFB2/SMARCA2/SEMA5A/MAP2/BDKRB1/HSPA1A/SIPA1/SEMA3A
BP	GO:0034501	protein localization to kinetochore	17	-0.843765	-2.17372	4.53435e-06	5.04828e-05	3.01611e-05	2603	tags=76%, list=13%, signal=66%	CHAMP1/MTBP/ZW10/SPDL1/CENPQ/RCC2/BUB3/ZWILCH/NDC80/TTK/AURKB/CDK1/CDT1
CC	GO:0005911	cell-cell junction	467	0.456594	1.49306	4.57823e-06	5.09014e-05	3.04112e-05	2306	tags=24%, list=12%, signal=21%	DES/SYNM/SORBS1/PGM5/PDLIM3/FLNA/NEXN/TMEM47/LIMS2/FERMT2/NGFR/JAM2/CLDN5/MXRA8/CLMP/SGCA/JAM3/SYNPO/ATP1A2/CDH11/CNTNAP1/PECAM1/KIT/CLIC4/AMOTL1/HEG1/LDB3/PDLIM4/PDLIM7/NFASC/PTPRM/MPDZ/PKD2/HMCN1/BVES/DCHS1/CADM3/TMEM204/CGNL1/ANK2/MYADM/TEK/GJA1/ITGA5/CDH5/GJA4/AHNAK/FZD4/RDX/SCN4B/VAMP5/GJC1/CLDN11/RASIP1/VCL/CD53/ARHGAP24/TLN1/CNN3/OBSL1/FLRT2/CD99L2/PLXDC1/FXYD1/GJA5/ACTN1/ESAM/SHROOM4/CYTH…
BP	GO:0006026	aminoglycan catabolic process	67	0.682843	1.9426	4.67902e-06	5.19506e-05	3.10381e-05	1683	tags=30%, list=9%, signal=27%	OGN/PRELP/DCN/LUM/OMD/FMOD/BGN/VCAN/GPC3/SDC2/CSPG4/GPC6/FGF2/HSPG2/TGFB1/LYVE1/SDC3/IDS/ARSB/CHI3L2
BP	GO:0006626	protein targeting to mitochondrion	96	-0.517255	-1.8796	4.80541e-06	5.32808e-05	3.18328e-05	5741	tags=62%, list=29%, signal=45%	UBE2J2/PITRM1/HTRA2/MFF/NDUFA13/UBE2D3/ARIH2/UBL5/SLC25A6/RNF31/PAM16/CSNK2A2/USP36/BAP1/IMMP1L/PARL/HPS4/UBE2L3/HAX1/DNAJC19/TOMM40L/GSK3A/TIMM22/SAMM50/TOMM20/SAE1/PMPCB/TIMM9/TIMM23/TIMM21/HSPA4/BAG4/GRPEL2/ROMO1/TIMM17B/PDCD5/SREBF2/TIMM50/TIMM44/CHCHD4/TIMM8B/TIMM17A/DNAJC15/TSPO/TIMM10/BID/HSP90AA1/PMPCA/TOMM5/TIMM13/FZD5/MIPEP/GRPEL1/TOMM22/BCAP31/AIFM1/SREBF1/TOMM34/TOMM40/HSPD1
BP	GO:0045670	regulation of osteoclast differentiation	62	0.683004	1.91852	4.8308e-06	5.34891e-05	3.19573e-05	4150	tags=52%, list=21%, signal=41%	SFRP1/FBN1/RASSF2/LTF/MAFB/CARTPT/LRRC17/GPR68/FSTL3/MITF/TYROBP/TREM2/TLR4/KLF10/NOTCH2/PIK3R1/CLDN18/FOS/CSF1/CA2/INPP5D/TMEM178A/CAMK4/CCR1/TNFSF11/LILRB1/GPR137B/TLR3/LILRB4/SLC9B2/LILRB3/TFE3
CC	GO:0000314	organellar small ribosomal subunit	28	-0.756654	-2.17718	4.85447e-06	5.36045e-05	3.20262e-05	3334	tags=79%, list=17%, signal=65%	MRPL42/MRPS31/MRPS24/MRPS27/MRPS18C/DAP3/MRPS16/MRPS33/MRPS7/MRPS10/MRPS15/MRPS22/MRPS18B/MRPS28/MRPS9/MRPS18A/MRPS35/MRPS34/MRPS12/MRPS5/MRPS26/MRPS2
CC	GO:0005763	mitochondrial small ribosomal subunit	28	-0.756654	-2.17718	4.85447e-06	5.36045e-05	3.20262e-05	3334	tags=79%, list=17%, signal=65%	MRPL42/MRPS31/MRPS24/MRPS27/MRPS18C/DAP3/MRPS16/MRPS33/MRPS7/MRPS10/MRPS15/MRPS22/MRPS18B/MRPS28/MRPS9/MRPS18A/MRPS35/MRPS34/MRPS12/MRPS5/MRPS26/MRPS2
BP	GO:0007389	pattern specification process	415	0.466996	1.52478	5.0332e-06	5.55023e-05	3.316e-05	3973	tags=30%, list=20%, signal=25%	SFRP2/GREM1/BARX1/SFRP1/HAND2/FOXF1/HEYL/C3/ROR2/MEOX2/BICC1/MEF2C/GPC3/SIX2/NRP2/BASP1/PKD2/DCHS1/BHLHE41/HOXA4/GLI1/MAFB/FGF10/GLI3/ZBTB16/ROBO1/ISL1/PRKACB/MEIS1/WLS/PBX3/TGFBR2/PBX1/ENG/MEOX1/SEMA3C/EGR2/NR2F2/SOX17/SMO/GLI2/EDN1/SOX18/HOXA5/SMARCD3/CITED2/WNT2B/NKX3-2/CDON/BTG2/ACVRL1/LEF1/HOXB2/MFNG/CHRD/MEIS3/HHIP/ITGAM/PTCH1/HOXB4/HOXA3/SPRY1/VANGL2/FOXC2/STC1/TSHZ1/AR/HOXA2/C1QA/TGFBR1/T…
BP	GO:0032103	positive regulation of response to external stimulus	477	0.461879	1.511	5.0675e-06	5.58046e-05	3.33406e-05	3218	tags=31%, list=16%, signal=26%	THBS4/CCL19/SMOC2/CCL21/FLNA/IL33/FABP4/THBS1/PTN/CXCL12/PGC/S1PR1/C3/SLIT2/FGFR1/PDGFRB/RARRES2/LPAR1/AGT/THBD/CXCR4/CCR7/LY86/CXCL14/PTGER3/PDE2A/FGF10/FGF2/VEGFC/PDGFD/IL6ST/PRKACB/CXCL13/IL34/TGFB1/LRP1/LY96/CLEC10A/SCG2/MUC6/CSF1R/SERPINE1/CAMK1D/GAS6/EDN1/PRKD1/GHRL/ETS1/NUPR1/AGTR1/CNR1/ICAM2/LPL/NRP1/BMP6/TYROBP/TREM2/CCR4/AIF1/OSMR/NCKAP1L/TLR10/SCIMP/LRRK2/SLAMF6/IL16/IFI16/C3AR1/FYN/C5…
BP	GO:0008589	regulation of smoothened signaling pathway	72	0.664816	1.90491	5.1242e-06	5.63523e-05	3.36679e-05	3944	tags=51%, list=20%, signal=41%	SFRP1/GAS1/EVC/SERPINE2/PRRX1/GPC3/PTCH2/GLI1/FGF10/GLI3/GLIS2/PRKACB/RAB34/SMO/GLI2/HHIP/PTCH1/RORA/CD3E/FUZ/SCUBE1/ARMC9/NDST1/TXNDC15/DYNC2H1/GPR161/FBXL17/KIF7/ENPP1/TCTN1/MEGF8/TTC23/CREBBP/IHH/SUFU/CHSY1/FGFR2
BP	GO:0022604	regulation of cell morphogenesis	293	0.496615	1.59905	5.18803e-06	5.69199e-05	3.4007e-05	3129	tags=33%, list=16%, signal=28%	FBLN1/FLNA/LIMS2/FERMT2/PTN/ITGA7/MYOC/PALM/CCL11/KIT/RHOJ/FN1/CCL2/CDC42EP3/TPM1/ENPP2/LPAR1/DLC1/PLEKHO1/BVES/CXCR4/MYADM/RHOB/SPARC/MSN/PALMD/FZD4/MYH10/PARVA/RDX/FGD5/CSF1R/POSTN/PDPN/PLXNA4/FMNL3/NRP1/DLG4/WASF3/OBSL1/PLXNC1/RHOQ/MACF1/FYN/ILK/EPB41L3/REG1A/NEDD9/ARHGAP15/KDR/FMNL1/ATP10A/EPHA4/PREX1/CORO1A/RHOBTB3/FGD1/SEMA3E/LST1/FES/WTIP/CPNE5/ITGB2/RHOBTB1/PLXNB3/EFNA5/RHOH/DBN1/APOA1/FG…
BP	GO:0043039	tRNA aminoacylation	29	-0.738463	-2.14119	5.18988e-06	5.69199e-05	3.4007e-05	4770	tags=90%, list=24%, signal=68%	SARS2/CARS2/HARS2/GATB/DALRD3/WARS2/GATC/PPA2/EARS2/AIMP1/QRSL1/VARS2/PARS2/TARS2/EEF1E1/YARS2/AARS2/PPA1/AIMP2/LARS2/NARS2/FARSB/FARSA/IARS2/MARS2/DARS2
BP	GO:0001937	negative regulation of endothelial cell proliferation	37	0.755632	1.96804	5.22685e-06	5.72478e-05	3.42029e-05	1745	tags=51%, list=9%, signal=47%	THBS1/NGFR/CAV1/SULF1/MEF2C/CCL2/PTPRM/SPARC/GJA1/SCG2/NR2F2/GHRL/CAV2/RGCC/ATOH8/ALOX5/APOE/VASH1/TGFBR1
BP	GO:1904064	positive regulation of cation transmembrane transport	132	0.567457	1.73433	5.28975e-06	5.78584e-05	3.45677e-05	3684	tags=42%, list=19%, signal=34%	FLNA/KCNMB1/JPH2/RAMP3/APLNR/CCL2/CACNA2D1/PKD2/DMD/THY1/ANK2/ATP1B2/F2R/HSPA2/F2RL3/KCNH2/EHD3/CACNB2/TRPC1/TREM2/FXYD1/GPER1/PLP1/CX3CL1/AKAP6/RGS9/CD19/CACNG4/KCNE2/ADRB2/ACTN2/PLCG2/AMIGO1/NLGN3/GSTM2/BDKRB1/GJC2/CASQ1/CCR2/PINK1/SNCA/RYR2/ABL1/RGN/TMSB4X/STAC/DRD1/CACNB3/TESC/GLRX/KCNA1/PDZK1/FGF14/ANO6/RELN
CC	GO:0045211	postsynaptic membrane	258	0.51247	1.63883	5.32011e-06	5.8112e-05	3.47192e-05	3973	tags=34%, list=20%, signal=27%	KCNMA1/SSPN/GABRP/KCTD12/PDLIM4/NRP2/CNTN1/DMD/ANK2/PTPRS/F2R/CHRM2/CACNA1C/EPHA7/SYNE1/UTRN/GRIK5/CHRNA3/NLGN2/SYNDIG1/KCND3/LZTS1/DLG4/SORCS2/PCDH17/RGS7BP/CLSTN3/KCNA3/GLRB/ITGB3/RGS9/P2RX1/SLC8A1/CACNG4/EPHA4/ACTN2/KCNB1/HTR2A/MAGEE1/GRID1/KCND1/NLGN4Y/GABBR1/NLGN3/CNKSR2/SNTA1/LRRC4B/DBN1/DNM1/TIAM1/MUSK/HIP1/CDH2/SEMA4C/MX2/LRRC4/PRRT1/GRIN2A/FAIM2/DNM3/LIN7A/EFNB3/CLSTN2/NLGN4X/IGSF9B/P2RY…
CC	GO:0005884	actin filament	110	0.605096	1.80811	5.33215e-06	5.8165e-05	3.47509e-05	3330	tags=43%, list=17%, signal=36%	LMOD1/DPYSL3/PDLIM3/FLNA/TPM2/PALLD/JAM3/GAS7/TMOD1/LDB3/SMTN/PDLIM4/PDLIM7/TPM1/PKD2/ACTC1/TEK/WIPF1/RCSD1/HCLS1/AIF1/RHOQ/ACTN1/ARHGAP6/FYN/LCP1/SHROOM4/WAS/MYO5A/CORO1A/ACTN2/DBN1/GNG12/ANXA1/WIPF3/EHBP1L1/DAPK3/MYO9B/RAC2/PDLIM5/PSTPIP1/DUSP22/HCK/PLS3/MYO1C/EHBP1/AIF1L
BP	GO:0006301	postreplication repair	49	-0.629851	-2.04792	5.48578e-06	5.97603e-05	3.5704e-05	4506	tags=59%, list=23%, signal=46%	UBE2A/RPA1/RCHY1/RFC1/RPA2/UBE2V2/MAD2L2/UBE2L6/UBE2N/PARP10/VCP/TRIM25/USP10/POLDIP2/RAD18/RPA3/POLD3/RFC5/MSH2/BRCA1/POLD1/USP43/RFC2/POLE2/RFC4/POLD2/RFC3/PCNA/DTL
BP	GO:0044783	G1 DNA damage checkpoint	62	-0.581084	-1.97984	5.50306e-06	5.9868e-05	3.57684e-05	2109	tags=39%, list=11%, signal=35%	CARM1/CNOT10/CASP2/TRIAP1/PRMT1/CDK2/E2F4/CCND1/MUC1/PRKDC/CNOT11/RFWD3/CHEK2/TFDP1/E2F7/CDC25C/E2F8/PCNA/GTSE1/SFN/E2F1/CDK1/CCNB1/AURKA
BP	GO:0002688	regulation of leukocyte chemotaxis	114	0.598227	1.79816	5.5406e-06	6.01954e-05	3.5964e-05	3195	tags=43%, list=16%, signal=36%	THBS4/CCL19/GREM1/CCL21/THBS1/PTN/CXCL12/JAM3/SLIT2/DUSP1/RARRES2/CCL2/CCR7/CXCL14/VEGFC/CXCL13/IL34/CSF1R/SERPINE1/CAMK1D/GAS6/EDN1/MMP28/AIF1/NCKAP1L/C3AR1/C5AR1/CXCL17/RIN3/GPSM3/BST1/VEGFB/STAP1/SWAP70/CMKLR1/IL6R/CD74/CCR2/MPP1/CSF1/NBL1/CCL5/RAC2/PGF/PLA2G7/CCR1/SLAMF8/PADI2/TNFSF18
BP	GO:0044819	mitotic G1/S transition checkpoint	62	-0.580862	-1.97909	5.75132e-06	6.2401e-05	3.72817e-05	2109	tags=39%, list=11%, signal=35%	CARM1/CNOT10/CASP2/TRIAP1/PRMT1/CDK2/E2F4/CCND1/MUC1/PRKDC/CNOT11/RFWD3/CHEK2/TFDP1/E2F7/CDC25C/E2F8/PCNA/GTSE1/SFN/E2F1/CDK1/CCNB1/AURKA
BP	GO:0051893	regulation of focal adhesion assembly	64	0.672876	1.90336	5.99656e-06	6.48879e-05	3.87675e-05	2585	tags=44%, list=13%, signal=38%	APOD/GREM1/SFRP1/THBS1/FERMT2/MYOC/FAM107A/EPHA3/PHLDB2/DLC1/THY1/TEK/COL16A1/LRP1/VCL/ACVRL1/NRP1/GPM6B/MACF1/ARHGAP6/KDR/LIMCH1/PEAK1/DUSP3/EFNA5/DAPK3/MMP14/PPM1F
BP	GO:0090109	regulation of cell-substrate junction assembly	64	0.672876	1.90336	5.99656e-06	6.48879e-05	3.87675e-05	2585	tags=44%, list=13%, signal=38%	APOD/GREM1/SFRP1/THBS1/FERMT2/MYOC/FAM107A/EPHA3/PHLDB2/DLC1/THY1/TEK/COL16A1/LRP1/VCL/ACVRL1/NRP1/GPM6B/MACF1/ARHGAP6/KDR/LIMCH1/PEAK1/DUSP3/EFNA5/DAPK3/MMP14/PPM1F
BP	GO:0030514	negative regulation of BMP signaling pathway	48	0.713699	1.93494	6.0548e-06	6.54307e-05	3.90918e-05	2541	tags=40%, list=13%, signal=35%	SFRP2/GREM1/CHRDL1/SFRP1/RBPMS2/GREM2/FBN1/HTRA3/HTRA1/FSTL3/CHRD/TWSG1/CRIM1/SKIL/SMAD7/SKI/NBL1/BMPER/NOG
MF	GO:0042805	actinin binding	36	0.762609	1.98508	6.09201e-06	6.57449e-05	3.92795e-05	1423	tags=31%, list=7%, signal=28%	SYNPO2/PDLIM3/PALLD/CSRP1/LDB3/PDLIM4/PDLIM7/PKD2/CACNA1C/CSRP2/KCNA5
BP	GO:1902905	positive regulation of supramolecular fiber organization	190	0.539097	1.69901	6.15172e-06	6.63009e-05	3.96117e-05	3318	tags=35%, list=17%, signal=30%	SYNPO2/LMOD1/CCL21/SFRP1/FLNA/CLU/MAP1B/FERMT2/SYNPO/MYOC/CFL2/CCL11/EFEMP2/GSN/CDC42EP3/TGFB3/TPM1/LPAR1/CCR7/STMN2/EVL/ARHGEF15/EDN1/NRP1/WASF3/NCKAP1L/RGCC/GMFG/DSTN/PFN2/CX3CL1/WAS/APOE/CORO1A/SWAP70/ACTN2/ARHGEF10/TAC1/TGFBR1/LIMCH1/SPIRE1/FES/SEMA5A/CCDC88A/APOA1/JMY/HSPA1A/SORBS3/WASF1/PLEK/FCHSD2/NAV3/GPR65/NIN/NOX4/PPM1F/CLIP1/CCL26/ABL1/HCK/ANKRD53/RAPGEF3/MYO1C/FER/MECP2/MAPT/WASF2
BP	GO:0043534	blood vessel endothelial cell migration	111	0.597539	1.7907	6.25807e-06	6.73575e-05	4.0243e-05	2401	tags=40%, list=12%, signal=35%	GREM1/THBS1/SLIT2/FGFR1/AKT3/MEOX2/ATP2B4/MMRN2/RHOJ/CLEC14A/MEF2C/SRPX2/ROBO1/FGF2/VEGFC/CDH5/TGFB1/EGR3/SOX18/PRKD1/ETS1/MAP3K3/ACVRL1/NRP1/RGCC/APOE/TBXA2R/KDR/VASH1/FOXC2/PTGS2/ANGPT1/STARD13/HDAC5/HSPB1/FGF18/CD40/NR4A1/NOS3/APOA1/ANXA1/GATA2/HDAC9/STAT5A
BP	GO:0032409	regulation of transporter activity	263	0.511882	1.63758	6.32683e-06	6.80071e-05	4.06311e-05	3753	tags=34%, list=19%, signal=28%	PLN/FHL1/JPH2/CASQ2/GEM/FXYD6/CAV1/RRAD/ATP1A2/KCNE4/MEF2C/CCL2/CACNA2D1/PKD2/DMD/ANK2/STOM/ATP1B2/CLIC2/GJA1/HSPA2/UTRN/AHNAK/NLGN2/SCN4B/REM1/PRNP/ADRA2A/EHD3/ABCB1/CACNB2/PDE4B/DLG4/TREM2/FXYD1/TWIST1/VAMP2/SCN1B/AKAP6/BCL2/RGS9/CACNG4/KCNE2/ADRB2/ACTN2/RASGRF2/PLCG2/PTAFR/ADIPOQ/PIM1/AMIGO1/NLGN3/GSTM2/DAPK1/PDE4D/CASQ1/CCR2/PINK1/SNCA/ITGB1/SLMAP/PRRT1/RYR2/KCTD7/GRIN2A/HECW2/SGK1/OSR1/RGN/T…
BP	GO:0000726	non-recombinational repair	77	-0.553151	-1.97302	6.43579e-06	6.90865e-05	4.1276e-05	4122	tags=47%, list=21%, signal=37%	PNKP/PARP9/SIRT7/RIF1/UBE2V2/LIG3/MAD2L2/RNF138/UBE2N/DTX3L/MDC1/NBN/XRCC5/SUMO1/HMGA2/WRAP53/POLB/POLA1/HSF1/HMCES/PAXIP1/PRPF19/RBBP8/XRCC6/DCLRE1B/HMGB1/BARD1/BRCC3/PRKDC/DCLRE1A/REXO4/PSMD14/BRCA1/POLQ/HMGB2/AUNIP
BP	GO:0014812	muscle cell migration	76	0.654155	1.88657	6.51617e-06	6.98568e-05	4.17362e-05	3324	tags=51%, list=17%, signal=43%	THBS4/IGFBP5/MYOCD/ADAMTS1/SLIT2/PDGFRB/MEF2C/TPM1/LPAR1/PLEKHO1/PRKG1/NR4A3/PDGFD/LRP1/PARVA/SERPINE1/POSTN/SMO/PLAT/VTN/IGFBP3/NRP1/IGF1/AIF1/ITGB3/BCL2/SEMA6D/ADIPOQ/ANXA1/NOX4/CCL5/HAS2/DOCK4/SSH1/ROCK1/BMPR1A/FOXO4/PDGFA/HDAC4
BP	GO:0000466	maturation of 5.8S rRNA from tricistronic rRNA transcript (SSU-rRNA, 5.8S rRNA, LSU-rRNA)	24	-0.777604	-2.17084	6.65104e-06	7.11385e-05	4.2502e-05	3567	tags=88%, list=18%, signal=72%	FTSJ3/NOP9/URB1/UTP20/RCL1/EXOSC10/ERI2/ERI1/RPS21/EXOSC3/ABT1/EXOSC7/EXOSC9/WDR12/RPP40/EXOSC2/NOP14/PES1/EXOSC8/RRS1/BOP1
BP	GO:0051928	positive regulation of calcium ion transport	114	0.596141	1.79189	6.65667e-06	7.11385e-05	4.2502e-05	3697	tags=42%, list=19%, signal=34%	MYLK/JPH2/CXCL12/CAV1/RAMP3/APLNR/PDGFRB/CCL2/CACNA2D1/PKD2/THY1/ANK2/F2R/HSPA2/F2RL3/EHD3/CACNB2/TRPC1/GPER1/PLP1/CX3CL1/AKAP6/CD19/CD4/STC1/KCNE2/PLCG2/P2RX7/GSTM2/BDKRB1/GJC2/CASQ1/SNCA/TRPV2/CCL5/RYR2/ABL1/GCG/RGN/CCR1/TRPC6/STAC/DRD1/CACNB3/P2RX5/PDGFB/FGF14/P2RX2
BP	GO:0048588	developmental cell growth	210	0.530452	1.67857	6.66209e-06	7.11385e-05	4.2502e-05	2914	tags=32%, list=15%, signal=27%	PI16/NDN/MAP1B/SLIT3/CXCL12/NTN1/SLIT2/RGS2/FN1/NRP2/CXCR4/PTPRS/EPHA7/SEMA3G/LRP1/RGS4/TGFBR2/SEMA3C/SORBS2/POSTN/EDN1/PLXNA4/L1CAM/VCL/SEMA6A/DCLK1/OLFM1/NRP1/CRABP2/IGF1/TNN/MACF1/SEMA6B/DPYSL2/AKAP6/REG1A/APOE/LAMB2/ITGA4/SEMA6D/SEMA6C/ISLR2/SEMA3E/BMPR2/AUTS2/CPNE5/SEMA5A/MAP2/NLGN3/ULK2/DBN1/TIAM1/SEMA3A/WASF1/SMAD7/NGF/SEMA4C/NIN/TRPV2/AKAP13/RTN4/PPP3CB/SEMA7A/PRMT2/ABL1/PDLIM5/SLC23A2
BP	GO:0007098	centrosome cycle	124	-0.480693	-1.85942	6.81152e-06	7.26382e-05	4.3398e-05	4385	tags=46%, list=22%, signal=36%	NSFL1C/SPICE1/CEP192/CEP250/RTTN/HAUS4/CNTROB/CEP152/PDCD6IP/CEP295/ATF5/CEP76/HAUS2/HAUS8/CHMP5/HAUS1/CHMP2B/SSX2IP/XRCC3/CHMP1A/NUP62/HAUS5/CTNNB1/SLC16A1/CENPJ/CHORDC1/ODF2/PARD6B/RBM14/HAUS6/CDK2/CEP131/GEN1/BRCA2/CEP85/NAT10/NPM1/CKAP5/KAT2A/BRCA1/SASS6/WDR62/CEP72/SAC3D1/CHMP4C/CHEK1/XRCC2/RANBP1/NDC80/STIL/PLK4/CCNF/KIF11/CDK1/PLK1/NEK2/AURKA
BP	GO:0001570	vasculogenesis	77	0.653488	1.8844	6.83588e-06	7.28021e-05	4.34959e-05	2582	tags=43%, list=13%, signal=37%	FOXF1/MYOCD/CAV1/RAMP2/HEG1/TMEM100/APLNR/PDGFRB/CD34/TGFB1/TIE1/TGFBR2/ENG/TGFBR3/FZD4/QKI/SOX17/SMO/ZFPM2/RRAS/SOX18/GJC1/RASIP1/ACKR3/KDR/ZMIZ1/ZFP36L1/RAP1A/ITGAV/EGFL7/HEY2/NTRK2/HAS2
BP	GO:0007156	homophilic cell adhesion via plasma membrane adhesion molecules	162	0.555925	1.72733	7.0429e-06	7.49083e-05	4.47542e-05	4333	tags=45%, list=22%, signal=35%	NEXN/PALLD/CDH11/PECAM1/VSTM2L/PCDHGC3/PTPRM/PCDH7/HMCN1/DCHS1/CADM3/ROBO1/CDH5/FAT4/PCDH18/L1CAM/PCDHGB7/PKD1/OBSL1/CNTN4/PCDH17/PCDHB4/ESAM/CLSTN3/AMIGO2/EMB/CD84/PCDHGA12/PCDHB5/ROBO4/TENM3/AMIGO1/PLXNB3/CDH19/PCDH12/RET/CDH6/CDH2/ITGB1/PCDHGB6/SDK1/TRO/PCDHB15/PCDHB11/CADM1/PCDHB7/PCDH10/PCDHGA9/PCDHB10/CLSTN2/FAT3/PCDHB12/PCDHB2/CDHR5/CDH23/PCDHGB5/PCDH9/PCDHB16/MYOT/IGSF21/CDH13/PCDHB6/ROBO…
BP	GO:0003179	heart valve morphogenesis	52	0.701682	1.92231	7.05283e-06	7.49154e-05	4.47585e-05	2376	tags=48%, list=12%, signal=42%	ELN/EMILIN1/SLIT3/HEYL/SLIT2/MEF2C/DCHS1/ROBO1/TGFB1/TIE1/TGFBR2/OLFM1/SNAI2/GJA5/SCX/TWIST1/NFATC1/BMPR2/GATA3/TGFB2/NOTCH2/ADAMTS9/NOS3/HEY2/ACVR1
CC	GO:0044815	DNA packaging complex	23	-0.768451	-2.1179	7.14456e-06	7.57903e-05	4.52812e-05	1303	tags=43%, list=7%, signal=41%	KDM1B/NCAPH2/NCAPD3/NCAPD2/SMC4/SMC2/NCAPG2/NCAPG/CENPA/NCAPH
CC	GO:0042575	DNA polymerase complex	20	-0.794205	-2.09562	7.16831e-06	7.59248e-05	4.53616e-05	1964	tags=65%, list=10%, signal=59%	POLA1/CHRAC1/PRIM2/POLE/POLD3/POLE3/PRIM1/POLA2/POLD1/DNA2/POLE2/POLD2/MCM3
BP	GO:0009301	snRNA transcription	72	-0.560151	-1.96145	7.17599e-06	7.59248e-05	4.53616e-05	5827	tags=71%, list=30%, signal=50%	ICE2/ICE1/INTS6/ZC3H8/SNAPC1/SP1/GTF2F1/RPRD1A/GTF2E1/INTS9/CCNT1/POU2F1/ELL3/GTF2B/INTS4/POLR2A/INTS12/POLR2C/TAF6/POLR2K/TAF11/CCNK/TBP/POLR2I/MEPCE/INTS5/TAF9/POLR2G/POLR2E/POLR2B/POLR2J/INTS1/NCBP1/CC2D1A/INTS2/NCBP2/POLR2L/NABP2/CDK7/GTF2F2/SNAPC4/RPRD1B/INTS8/POLR2D/GTF2A2/INTS7/TAF5/GTF2E2/INTS10/SRRT/POLR2H
CC	GO:1902495	transmembrane transporter complex	315	0.488255	1.5782	7.21843e-06	7.62741e-05	4.55702e-05	3926	tags=27%, list=20%, signal=22%	PLN/KCNMB1/KCNMA1/CASQ2/CACNA1H/ABCC9/ATP1A2/GABRP/KCNE4/CLIC4/KCNJ8/CACNA2D1/PKD2/ATP1B2/CLIC2/HSPA2/CACNA1C/KCNH2/GRIK5/CHRNA3/SCN4B/KCND3/CLIC6/SCN7A/CACNB2/KCNS3/PDE4B/DLG4/PKD1/TRPC1/ATP4B/FXYD1/SNAP25/VAMP2/TTYH2/SCN1B/AKAP6/KCNA3/KCNA5/GLRB/MICU3/CACNG4/KCNE2/KCNK2/LRRC8C/KCNB1/TRPC4/AMIGO1/KCND1/PDE4D/SCNN1B/CPT1C/RYR2/GRIN2A/KCNJ5/CACNA2D3/KCNQ4/OLFM2/TRPC6/KCNAB1/ANO1/CACNA2D2/KCNN4/ATP…
MF	GO:0017147	Wnt-protein binding	30	0.786833	1.98432	7.23171e-06	7.63148e-05	4.55946e-05	1954	tags=53%, list=10%, signal=48%	SFRP2/SFRP4/SFRP1/FRZB/ROR2/RECK/CTHRC1/FZD8/WLS/FZD7/FZD4/ROR1/FZD1/TRABD2B/APCDD1/SFRP5
BP	GO:0071675	regulation of mononuclear cell migration	108	0.60509	1.80815	7.24811e-06	7.63883e-05	4.56385e-05	3195	tags=41%, list=16%, signal=34%	APOD/GREM1/CCL21/THBS1/JAM2/CXCL12/SLIT2/DUSP1/RARRES2/CCL2/CCR7/CXCL14/MSN/PDGFD/CXCL13/IL34/CD200/CSF1R/SERPINE1/GAS6/AIF1/ECM1/CD99L2/C3AR1/MADCAM1/C5AR1/SPN/CXCL17/DOCK8/ITGA4/CMKLR1/CCR2/STK10/CSF1/NBL1/CCL5/PLCB1/PLA2G7/CCR1/SLAMF8/PADI2/GCSAM/CD200R1/TNFSF18
BP	GO:0000470	maturation of LSU-rRNA	27	-0.752645	-2.1283	7.31615e-06	7.70051e-05	4.6007e-05	4003	tags=81%, list=20%, signal=65%	ZNHIT3/RPF1/FTSJ3/URB1/RSL1D1/RPL35/MRPL1/RPL7/MAK16/RPL7A/LAS1L/NHP2/DDX18/EIF6/WDR12/RPF2/GTPBP4/PES1/RPL7L1/NIFK/NOP2/BOP1
BP	GO:0010499	proteasomal ubiquitin-independent protein catabolic process	22	-0.793998	-2.15565	7.3382e-06	7.71369e-05	4.60857e-05	3167	tags=68%, list=16%, signal=57%	PSMB6/PSMA6/PSMB10/PSMB9/PSMB2/PSMB4/PSMB1/PSMA7/PSMB7/PSMB3/PSMA4/PSMA5/PSMA3/PSMB5/PSMB8
BP	GO:0050670	regulation of lymphocyte proliferation	214	0.520146	1.65112	7.35908e-06	7.72561e-05	4.61569e-05	3808	tags=44%, list=19%, signal=36%	CCL19/LRRC32/IGF2/MEF2C/GPR183/GPNMB/VCAM1/FGF10/IL6ST/TGFBR2/CD22/PRNP/PTPRC/SASH3/HLA-DPB1/TYROBP/BLK/IGF1/AIF1/NCKAP1L/TWSG1/MZB1/TLR4/HLA-DPA1/BCL2/BTK/CD4/SPN/VSIG4/RASAL3/BST1/MNDA/TNFSF8/BCL6/CARD11/CD3E/IRS2/TNFRSF13C/CD1D/MAPK8IP1/JAK3/STAT5B/PLA2G2D/CORO1A/LMO1/TAC1/LST1/TNFSF13B/CD28/CD40LG/EBI3/FCRL3/CD40/CLC/CD74/IKZF3/CD6/TNFRSF13B/CCR2/CD209/ANXA1/FCGR2B/NFATC2/HLA-DMB/CCL5/CR1/IGF…
BP	GO:1904869	regulation of protein localization to Cajal body	11	-0.917184	-2.07855	7.52565e-06	7.88003e-05	4.70795e-05	830	tags=82%, list=4%, signal=78%	CCT4/CCT2/TCP1/CCT7/CCT3/CCT8/CCT5/CCT6A/DKC1
BP	GO:1904871	positive regulation of protein localization to Cajal body	11	-0.917184	-2.07855	7.52565e-06	7.88003e-05	4.70795e-05	830	tags=82%, list=4%, signal=78%	CCT4/CCT2/TCP1/CCT7/CCT3/CCT8/CCT5/CCT6A/DKC1
MF	GO:0003899	DNA-directed 5'-3' RNA polymerase activity	36	-0.696862	-2.10974	7.53968e-06	7.88452e-05	4.71063e-05	4992	tags=78%, list=25%, signal=58%	POLR3E/POLR3D/POLR3F/POLR2A/POLR2C/POLR2K/POLR3B/RPAP1/POLR2I/POLR3H/POLR2G/POLR1D/POLR3A/POLR1E/POLR2E/POLR2B/POLR2J/MED20/POLR2L/POLR1A/POLR2D/POLRMT/POLR3G/POLR3K/POLR1B/PRIM1/POLR2H/POLR1C
MF	GO:0016893	endonuclease activity, active with either ribo- or deoxyribonucleic acids and producing 5'-phosphomonoesters	39	-0.674476	-2.08076	7.56902e-06	7.90498e-05	4.72286e-05	3670	tags=54%, list=19%, signal=44%	RPP38/DROSHA/POP5/ELAC2/DBR1/TATDN1/RPP21/ZGRF1/POP4/AGO2/APEX1/GEN1/RPP40/MRPL44/POP1/DNA2/POP7/RPP25/RNASEH2A/EXO1/FEN1
MF	GO:0004866	endopeptidase inhibitor activity	173	0.55081	1.72659	7.83655e-06	8.17385e-05	4.88349e-05	2360	tags=25%, list=12%, signal=22%	A2M/SERPINF1/SERPING1/CST2/SPOCK1/TIMP2/C3/TIMP3/ITIH5/PCSK1N/PAPLN/LTF/SERPINE2/COL6A3/C4A/AGT/C4B/RECK/SPOCK2/TIMP1/PROS1/WFDC1/SPINK1/SERPINE1/LXN/PRNP/GAS6/CD27/CD109/SPINK4/TFPI2/TFPI/CST7/CSTA/SPINK5/CRIM1/RARRES1/CST6/TNFAIP8/SNCA/NGF/COL4A3/TIMP4
BP	GO:0042770	signal transduction in response to DNA damage	124	-0.478511	-1.85098	7.89054e-06	8.21827e-05	4.91004e-05	3347	tags=40%, list=17%, signal=33%	PSMD10/CNOT7/MYO6/MAD2L2/BCL3/CNOT3/TFAP4/CDC5L/NBN/PIDD1/SMYD2/CARM1/CNOT10/CASP2/USP10/RINT1/PAXIP1/TRIAP1/KDM1A/PRMT1/PRPF19/CDK2/E2F4/EEF1E1/BID/MUC1/BRCC3/PRKDC/BRCA2/PMAIP1/CNOT11/BRCA1/MIF/CHEK2/TFDP1/E2F7/CHEK1/CDC25C/E2F8/PCNA/GTSE1/DTL/SFN/E2F1/CDK1/PLK1/CCNB1/FOXM1/AURKA
BP	GO:0072577	endothelial cell apoptotic process	53	0.700259	1.92756	7.89945e-06	8.21827e-05	4.91004e-05	2299	tags=43%, list=12%, signal=38%	THBS1/RAMP2/CCL2/TEK/CDH5/ECSCR/SCG2/NDNF/SERPINE1/CD248/GAS6/RGCC/GPER1/KDR/ITGA4/ANGPT1/BMPR2/GATA3/SEMA5A/CD40LG/CD40/GATA2/COL4A3
BP	GO:0010596	negative regulation of endothelial cell migration	51	0.705945	1.93292	7.95015e-06	8.2604e-05	4.93521e-05	2021	tags=43%, list=10%, signal=39%	DCN/SERPINF1/THBS1/SLIT2/MEOX2/ATP2B4/MMRN2/MEF2C/PTPRM/FGF2/CXCL13/TGFB1/NR2F2/ACVRL1/RGCC/APOE/TBXA2R/VASH1/STC1/STARD13/HDAC5/ADAMTS9
BP	GO:0002761	regulation of myeloid leukocyte differentiation	114	0.593971	1.78537	8.01191e-06	8.31389e-05	4.96717e-05	3387	tags=42%, list=17%, signal=35%	SFRP1/FBN1/ROR2/RASSF2/LTF/EVI2B/MAFB/IL34/CARTPT/TGFB1/LRRC17/HCLS1/GPR68/FSTL3/MITF/LEF1/TYROBP/TREM2/INHBA/TLR4/CD4/KLF10/NOTCH2/FES/C1QC/JUN/ZFP36L1/PIK3R1/CLDN18/ADIPOQ/FOS/CD74/GATA2/CSF1/CA2/RARA/HLA-DRB1/FOXP1/INPP5D/TMEM178A/CAMK4/CCR1/TAL1/KITLG/TNFSF11/LILRB1/TESC/GPR137B
BP	GO:0030449	regulation of complement activation	52	0.699592	1.91659	8.02868e-06	8.32063e-05	4.97119e-05	2822	tags=50%, list=14%, signal=43%	C7/A2M/CLU/C1S/SERPING1/C1R/C3/CFH/CR2/C4A/C4B/PROS1/VTN/C3AR1/C5AR1/CFI/CD19/VSIG4/CD59/C1QA/C1QC/C1QB/CFP/CR1/CD81/C6
BP	GO:0061640	cytoskeleton-dependent cytokinesis	83	-0.530596	-1.92494	8.05203e-06	8.33416e-05	4.97927e-05	408	tags=22%, list=2%, signal=21%	RTKN/KIF20B/CHMP4C/STMN1/INCENP/KIF20A/CKAP2/ESPL1/KIF23/RACGAP1/NUSAP1/CEP55/KIF4A/CENPA/ANLN/AURKB/ECT2/PLK1
MF	GO:0008094	DNA-dependent ATPase activity	50	-0.631474	-2.04608	8.08785e-06	8.36054e-05	4.99504e-05	2742	tags=44%, list=14%, signal=38%	RAD54B/XRCC3/MSH6/XRCC5/CDK7/SMARCA4/XRCC6/TTF2/DDX11/BLM/RFC5/MSH2/RFC2/ERCC6L/XRCC2/CHTF18/DSCC1/RFC4/RAD51/RFC3/RAD54L/TOP2A
BP	GO:0003170	heart valve development	60	0.686435	1.91965	8.16914e-06	8.4338e-05	5.03881e-05	2376	tags=43%, list=12%, signal=38%	ELN/EMILIN1/SLIT3/HEYL/SLIT2/MEF2C/DCHS1/PDE2A/ROBO1/TGFB1/TIE1/TGFBR2/OLFM1/SNAI2/GJA5/SCX/TWIST1/NFATC1/BMPR2/GATA3/TGFB2/NOTCH2/ADAMTS9/NOS3/HEY2/ACVR1
BP	GO:0032259	methylation	315	-0.353355	-1.51194	8.26165e-06	8.51844e-05	5.08937e-05	5205	tags=44%, list=26%, signal=33%	PPM1D/TRMT13/TDRKH/EHMT1/KMT2B/PRMT7/ZNF335/NSUN6/ZMPSTE24/PRDM10/ETF1/COMT/EEF2KMT/SETDB1/TRMT61B/BAZ2A/VCPKMT/SETD1A/NDUFAF5/HENMT1/FAM98A/PLD6/MGMT/LCMT1/ZCCHC4/PAXBP1/METTL21A/GSPT1/SETD9/METTL2B/PAGR1/MBD3/IWS1/TRMT5/RBM15B/EED/METTL15/TET3/METTL3/DPH5/PHF19/SIRT7/PRDM4/PCMT1/PWP1/RIF1/CTR9/GSK3A/RAB6A/TDRD5/CTCF/MAT1A/CHTOP/FTSJ3/CAMKMT/ZFP57/MEPCE/CBLL1/METTL1/COQ5/SNW1/MTF2/PYGO2/THUMPD2/…
CC	GO:0022624	proteasome accessory complex	24	-0.771679	-2.1543	8.43952e-06	8.69077e-05	5.19233e-05	3980	tags=92%, list=20%, signal=73%	PSMD4/PSMD6/PSMD10/PSMD7/PSMC1/PSMD1/PSMD8/PSMD5/PSMC3/PSME1/PSMD12/PSMC6/PSMC2/PSMD13/PSMD11/PSMC4/PSME3/ADRM1/PSMD2/PSMD14/PSMD3/PSME2
BP	GO:0007265	Ras protein signal transduction	326	0.484186	1.56643	8.52236e-06	8.76493e-05	5.23664e-05	3531	tags=36%, list=18%, signal=30%	NGFR/NTN1/RERG/TIMP2/KANK2/ARHGEF25/COL3A1/MYOC/RHOJ/HEG1/PDGFRB/COL1A2/CDC42EP3/LPAR1/PSD/DLC1/ITPKB/RHOB/F2R/FGF10/F2RL3/ROBO1/FGF2/MRAS/RASGRP2/RDX/F2RL2/ADRA2A/RRAS/PRKD1/P2RY8/PDPN/ELMO1/RASIP1/AGTR1/ARHGAP24/NRP1/P2RY10/ARHGDIB/RAB9B/SHC2/IGF1/AIF1/MAPRE2/ABCA1/ARHGAP6/CYTH3/WAS/PIK3CG/APOE/RASAL3/KCTD10/SPRY1/BCL6/IRS2/RASA3/ARHGAP29/STARD8/LPAR6/STARD13/ARHGEF10/RAB30/IQSEC1/RASGRF2/RAB12…
CC	GO:0043596	nuclear replication fork	35	-0.701822	-2.1284	8.54298e-06	8.77498e-05	5.24265e-05	4441	tags=69%, list=23%, signal=53%	BCAS2/SMARCAD1/RPA1/PLRG1/RPA2/BAZ1B/MMS22L/CDC5L/POLA1/PRPF19/PRIM2/TIPIN/RPA3/POLD3/PRIM1/POLA2/POLD1/WDHD1/POLD2/TIMELESS/MCM10/MCM3/PCNA/TONSL
BP	GO:0009117	nucleotide metabolic process	483	-0.315505	-1.40248	8.68276e-06	8.90726e-05	5.32167e-05	3230	tags=30%, list=16%, signal=26%	PFKL/AK7/OPA1/NME6/NAMPT/PDP1/TJP2/DGAT2/ACSM3/CTPS2/NUP153/PDK1/DGUOK/PGAM1/POM121/ADK/ACSL3/MTHFD2L/GSTZ1/CMPK1/NUP93/NT5C/PRPSAP1/NTHL1/ELOVL1/ADSL/PDP2/NUP62/MVK/PARP10/NUP98/TDG/ABCD1/DUT/SEC13/POM121C/NUP88/NUP160/NUP54/FOXK2/NUDT5/AFMID/ACACA/ACLY/NUP107/NUP43/SLC25A13/AAAS/VCP/SUCLA2/PFKFB4/NUDT2/ITPA/DLD/MVD/BPNT1/HKDC1/GALK1/ALDOC/PRPS2/PFAS/PFKP/UCKL1/NUP155/FLAD1/PDHX/APRT/PANK1/TECR/…
BP	GO:1904705	regulation of vascular associated smooth muscle cell proliferation	50	0.703117	1.91647	8.85187e-06	9.05778e-05	5.4116e-05	2175	tags=42%, list=11%, signal=37%	CNN1/IGFBP5/MYOCD/ADAMTS1/MMP2/EFEMP2/MEF2C/TGFB3/TPM1/PRKG1/NR4A3/GJA1/FGF2/EDN1/HPGD/IGF1/GPER1/JUN/ADIPOQ/GNAI2/MEF2D
BP	GO:1990874	vascular associated smooth muscle cell proliferation	50	0.703117	1.91647	8.85187e-06	9.05778e-05	5.4116e-05	2175	tags=42%, list=11%, signal=37%	CNN1/IGFBP5/MYOCD/ADAMTS1/MMP2/EFEMP2/MEF2C/TGFB3/TPM1/PRKG1/NR4A3/GJA1/FGF2/EDN1/HPGD/IGF1/GPER1/JUN/ADIPOQ/GNAI2/MEF2D
BP	GO:0198738	cell-cell signaling by wnt	498	0.44798	1.46636	9.05206e-06	9.25093e-05	5.527e-05	2586	tags=23%, list=13%, signal=21%	SFRP2/SFRP4/GREM1/BARX1/SFRP1/CPE/RSPO3/FRZB/IGFBP4/FERMT2/DACT3/IGFBP6/TGFB1I1/GNAO1/CAV1/SHISA3/WWTR1/DAAM2/MYOC/ROR2/SULF1/PRICKLE2/AMOTL1/BICC1/DACT1/DIXDC1/RBMS3/GPC3/MDFIC/PKD2/GPC6/HIC1/TMEM88/NXN/DKK3/RECK/GLI1/DAB2/CTHRC1/MCC/FGF10/GLI3/FZD8/ISL1/TCF7L1/WLS/TGFB1/LRP1/EGR1/CDK14/FZD7/FZD4/NFATC4/WNT9A/COL1A1/SOX17/SHISA2/PLEKHA4/GNG2/WNT2B/PRICKLE1/MITF/ROR1/SNAI2/LEF1/CALCOCO1/TLE4/PKD1…
MF	GO:0043394	proteoglycan binding	35	0.758106	1.95731	9.09748e-06	9.28562e-05	5.54773e-05	1867	tags=51%, list=9%, signal=47%	THBS1/PTN/TNC/SLIT2/CTSK/CFH/COMP/FN1/GPNMB/NID1/PTPRS/COL5A1/LRP1/PTPRC/LPL/APOE/PLA2G2D/SEMA5A
BP	GO:0072132	mesenchyme morphogenesis	49	0.70879	1.92276	9.24149e-06	9.42073e-05	5.62845e-05	3774	tags=61%, list=19%, signal=50%	ACTG2/ACTA2/FOXF1/HEYL/TMEM100/DCHS1/ACTC1/ROBO1/ISL1/TGFBR2/ENG/ACVRL1/SNAI2/LEF1/TWIST1/FOXC2/TGFBR1/TBX2/TGFB2/NOS3/HEY2/ACVR1/NOG/OSR1/BMPR1A/GATA5/ACTA1/HEY1/ROBO2/SNAI1
BP	GO:0017004	cytochrome complex assembly	34	-0.700842	-2.09289	9.26424e-06	9.42401e-05	5.63041e-05	4273	tags=76%, list=22%, signal=60%	SMIM20/PET117/COA3/COX17/CYBA/COX16/OXA1L/HCCS/COX18/TTC19/COX19/C12orf73/UQCC1/COX10/TIMM21/COX15/UQCC2/FASTKD3/TACO1/BCS1L/UQCC3/SLC25A33/UQCRFS1/SCO2/COA4/COA6
BP	GO:0006757	ATP generation from ADP	111	-0.484809	-1.83737	9.26799e-06	9.42401e-05	5.63041e-05	3034	tags=39%, list=15%, signal=33%	NUP153/PGAM1/POM121/NUP93/NUP62/NUP98/SEC13/POM121C/NUP88/NUP160/NUP54/FOXK2/NUP107/NUP43/AAAS/PFKFB4/HKDC1/GALK1/ALDOC/PFKP/NUP155/EIF6/NUP85/NUP35/SEH1L/MLXIPL/GIT1/NUP50/PFKFB2/RAE1/ALDOA/NUP188/NUP205/NUP37/LDHA/GPI/TPI1/PGK1/ENO1/GAPDH/PKM/NDC1/HK2
BP	GO:0006284	base-excision repair	39	-0.671756	-2.07237	9.44448e-06	9.58463e-05	5.72637e-05	3947	tags=62%, list=20%, signal=49%	RPA2/SMUG1/MUTYH/WRN/LIG3/NTHL1/TDG/APEX2/HMGA2/POLB/PARP2/APEX1/RPS3/HMGB1/NEIL3/POLE/RPA3/UNG/POLD1/LIG1/DNA2/POLQ/PCNA/FEN1
CC	GO:0005796	Golgi lumen	98	0.617765	1.83217	9.44964e-06	9.58463e-05	5.72637e-05	895	tags=18%, list=5%, signal=18%	OGN/PRELP/SOD3/DCN/LUM/OMD/FMOD/BGN/VCAN/GPC3/SDC2/CSPG4/GPC6/HSPG2/PROS1/TGFB1/MUC6/GAS6
BP	GO:0009135	purine nucleoside diphosphate metabolic process	131	-0.448799	-1.76362	9.63553e-06	9.74875e-05	5.82442e-05	3230	tags=36%, list=16%, signal=30%	PFKL/TJP2/NUP153/PGAM1/POM121/NUP93/NUP62/NUP98/SEC13/POM121C/NUP88/NUP160/NUP54/FOXK2/NUP107/NUP43/AAAS/PFKFB4/HKDC1/GALK1/ALDOC/PFKP/NUP155/EIF6/NUP85/NUP35/SEH1L/AK2/MLXIPL/GIT1/NUP50/PFKFB2/RAE1/ALDOA/NUP188/NUP205/NUP37/ENTPD2/LDHA/GPI/TPI1/PGK1/ENO1/GAPDH/PKM/NDC1/HK2
BP	GO:0009179	purine ribonucleoside diphosphate metabolic process	131	-0.448799	-1.76362	9.63553e-06	9.74875e-05	5.82442e-05	3230	tags=36%, list=16%, signal=30%	PFKL/TJP2/NUP153/PGAM1/POM121/NUP93/NUP62/NUP98/SEC13/POM121C/NUP88/NUP160/NUP54/FOXK2/NUP107/NUP43/AAAS/PFKFB4/HKDC1/GALK1/ALDOC/PFKP/NUP155/EIF6/NUP85/NUP35/SEH1L/AK2/MLXIPL/GIT1/NUP50/PFKFB2/RAE1/ALDOA/NUP188/NUP205/NUP37/ENTPD2/LDHA/GPI/TPI1/PGK1/ENO1/GAPDH/PKM/NDC1/HK2
BP	GO:0006096	glycolytic process	110	-0.486086	-1.84638	9.67402e-06	9.77547e-05	5.84039e-05	3034	tags=39%, list=15%, signal=33%	NUP153/PGAM1/POM121/NUP93/NUP62/NUP98/SEC13/POM121C/NUP88/NUP160/NUP54/FOXK2/NUP107/NUP43/AAAS/PFKFB4/HKDC1/GALK1/ALDOC/PFKP/NUP155/EIF6/NUP85/NUP35/SEH1L/MLXIPL/GIT1/NUP50/PFKFB2/RAE1/ALDOA/NUP188/NUP205/NUP37/LDHA/GPI/TPI1/PGK1/ENO1/GAPDH/PKM/NDC1/HK2
MF	GO:0045182	translation regulator activity	131	-0.448255	-1.76149	9.92102e-06	0.000100126	5.98204e-05	4585	tags=46%, list=23%, signal=35%	EIF1/EIF3C/FXR1/MTRF1/GSPT1/EIF2B4/GTPBP2/EEF1D/ABCF1/EEFSEC/IGF2BP3/EIF5/IREB2/HBS1L/FMR1/EIF2A/EIF2B2/EIF3H/EIF3A/EIF2B5/EIF3J/EIF1AD/EIF4H/EIF4E2/COPS5/EEF1B2/DENR/SHMT1/EIF3D/LARP1/EIF4E/EIF3M/AGO2/EIF2S3/EIF2AK1/EIF3E/PAIP1/IGF2BP1/MCTS1/TSFM/EIF6/GFM1/PABPC1/EIF4G1/EIF3I/EIF2S1/TUFM/EIF2S2/EIF1AX/EIF3B/EIF5AL1/MTIF2/DHFR/EIF4A3/IGF2BP2/EIF5A/C1QBP/EIF4EBP1/SHMT2/TYMS
BP	GO:0006813	potassium ion transport	225	0.52617	1.67099	9.96584e-06	0.000100453	6.00158e-05	3861	tags=31%, list=20%, signal=25%	FHL1/FLNA/KCNMB1/KCNMA1/CASQ2/CAV1/ABCC9/ATP1A2/SLC24A3/AQP1/VIP/KCNE4/KCNJ8/PKD2/ANK2/ATP1B2/SLC9A9/KCNH2/RGS4/KCNK3/ADRA2A/KCND3/KCNS3/TREM2/ATP4B/FXYD1/GJA5/SNAP25/VAMP2/KCNN3/AKAP6/KCNA3/KCNA5/KCNE2/KCNK2/SLC12A4/ACTN2/ADCYAP1/KCNB1/ATP4A/HTR2A/AMIGO1/KCND1/ITGB1/NALCN/P2RY12/KCNJ5/KCNT2/KCNQ4/KCNAB1/KCNN4/ATP1A3/DRD1/NEDD4/DPP6/KCNIP1/SLC12A6/KLHL24/KCNG1/PTEN/KCNJ15/KCNA1/KCNIP3/KCNAB2/ANO6…
BP	GO:0016055	Wnt signaling pathway	496	0.448972	1.46942	1.00344e-05	0.000101018	6.03538e-05	2586	tags=23%, list=13%, signal=21%	SFRP2/SFRP4/GREM1/BARX1/SFRP1/CPE/RSPO3/FRZB/IGFBP4/FERMT2/DACT3/IGFBP6/TGFB1I1/GNAO1/CAV1/SHISA3/WWTR1/DAAM2/MYOC/ROR2/SULF1/PRICKLE2/AMOTL1/BICC1/DACT1/DIXDC1/RBMS3/GPC3/MDFIC/PKD2/GPC6/HIC1/TMEM88/NXN/DKK3/RECK/GLI1/DAB2/CTHRC1/MCC/FGF10/GLI3/FZD8/ISL1/TCF7L1/WLS/TGFB1/LRP1/EGR1/CDK14/FZD7/FZD4/NFATC4/WNT9A/COL1A1/SOX17/SHISA2/PLEKHA4/GNG2/WNT2B/PRICKLE1/MITF/ROR1/SNAI2/LEF1/CALCOCO1/TLE4/PKD1…
BP	GO:0042795	snRNA transcription by RNA polymerase II	71	-0.560888	-1.94684	1.04416e-05	0.000104909	6.26781e-05	5827	tags=72%, list=30%, signal=51%	ICE2/ICE1/INTS6/ZC3H8/SNAPC1/SP1/GTF2F1/RPRD1A/GTF2E1/INTS9/CCNT1/POU2F1/ELL3/GTF2B/INTS4/POLR2A/INTS12/POLR2C/TAF6/POLR2K/TAF11/CCNK/TBP/POLR2I/MEPCE/INTS5/TAF9/POLR2G/POLR2E/POLR2B/POLR2J/INTS1/NCBP1/CC2D1A/INTS2/NCBP2/POLR2L/NABP2/CDK7/GTF2F2/SNAPC4/RPRD1B/INTS8/POLR2D/GTF2A2/INTS7/TAF5/GTF2E2/INTS10/SRRT/POLR2H
BP	GO:0007076	mitotic chromosome condensation	14	-0.865853	-2.08393	1.04468e-05	0.000104909	6.26781e-05	1199	tags=64%, list=6%, signal=60%	NCAPH2/NCAPD3/NCAPD2/SMC4/SMC2/NUSAP1/NCAPG/NCAPH/CDCA5
BP	GO:0050870	positive regulation of T cell activation	206	0.530464	1.67344	1.06697e-05	0.00010698	6.39159e-05	3822	tags=46%, list=19%, signal=37%	CCL19/CCL21/CAV1/IGF2/CCL2/ITPKB/CCR7/THY1/VCAM1/GLI3/ZBTB16/IL6ST/LGALS1/TGFBR2/EGR3/PTPRC/CD27/GLI2/SASH3/IL7R/HLA-DPB1/LEF1/IGF1/AIF1/NCKAP1L/FYN/CD5/HLA-DPA1/CD4/RASAL3/DOCK8/BCL6/CARD11/CD3E/TNFRSF13C/CD1D/JAK3/STAT5B/CORO1A/TNFSF13B/GATA3/CD28/ZMIZ1/TESPA1/CD40LG/PIK3R1/EBI3/RHOH/HLA-DRA/CD74/CD6/VAV1/CCR2/CD209/ANXA1/HLA-DMB/CCL5/CR1/IGFBP2/RARA/HLA-DRB1/PDCD1LG2/ZAP70/IL4R/CLECL1/CD86/SOC…
BP	GO:0006959	humoral immune response	258	0.504812	1.61434	1.06928e-05	0.00010698	6.39159e-05	2850	tags=28%, list=14%, signal=25%	C7/MFAP4/A2M/CLU/C1S/SERPING1/C1R/PGC/C3/CFH/CR2/MS4A1/LTF/MEF2C/RARRES2/GPR183/CCL2/C4A/C4B/CCR7/RNASE6/CXCL14/IGLL5/CFD/PROS1/CXCL13/CHGA/CTSG/ITLN1/PTPRC/VTN/POU2F2/TREM2/FCER2/LYZ/RGCC/C3AR1/C5AR1/CFI/BCL2/POU2AF1/PAX5/REG1A/ALOX5/CD19/VSIG4/BST1/CD59/C1RL/C1QA/SPINK5/GATA3/CD28/NOTCH2/C1QC/EBI3/BPIFB1/FCN1/C1QB/FCGR2B/SH2D1A/ST6GAL1/CFP/CR1/BLNK/HLA-DRB1/CCL13/BPIFB2/SFTPD/CD81/IGLL1/C6/CD83
BP	GO:0090596	sensory organ morphogenesis	239	0.508968	1.62783	1.06928e-05	0.00010698	6.39159e-05	2541	tags=22%, list=13%, signal=19%	EFEMP1/MFAP5/FRZB/COL8A1/PTN/FBN1/NTN1/ROR2/ALDH1A3/COL8A2/FOXF2/PRRX1/SIX2/PTPRM/THY1/CTHRC1/MAFB/FGF10/GLI3/MEIS1/COL5A1/SOBP/WNT9A/GLI2/EDN1/WNT2B/NKX3-2/CDON/COL5A2/LRIG1/MFAP2/OBSL1/RBP4/TWIST1/RARB/BCL2/TSHZ1/HOXA2/TBX2/GATA3/NOTCH2/ZHX2/TENM3/THRB/AQP5/GATA2/SLITRK6/SKI/SOX8/SDK1/NTRK2/NOG
BP	GO:0072521	purine-containing compound metabolic process	413	-0.322892	-1.40742	1.07073e-05	0.000106993	6.39236e-05	3230	tags=31%, list=16%, signal=26%	PFKL/OPA1/NME6/PDP1/TJP2/DGAT2/ACSM3/NUP153/PDK1/DGUOK/PGAM1/POM121/ADK/ACSL3/MTHFD2L/GSTZ1/NUP93/NT5C/PEMT/PRPSAP1/MTAP/ELOVL1/ADSL/PDP2/NUP62/MVK/NUP98/ABCD1/SEC13/POM121C/NUP88/NUP160/NUP54/FOXK2/ACACA/ACLY/SHMT1/NUP107/NUP43/SLC25A13/AAAS/VCP/SUCLA2/PFKFB4/NUDT2/ITPA/DLD/MVD/BPNT1/HKDC1/GALK1/ALDOC/PRPS2/PFAS/PFKP/NUP155/PDHX/APRT/KDM1A/PANK1/TECR/DCK/PARP1/EIF6/ACSS2/NUP85/OXSM/OARD1/GART/EL…
BP	GO:0006090	pyruvate metabolic process	146	-0.441054	-1.73468	1.07465e-05	0.000107253	6.4079e-05	3230	tags=40%, list=16%, signal=33%	PFKL/PDP1/NUP153/PDK1/PGAM1/POM121/GSTZ1/NUP93/PDP2/NUP62/NUP98/SEC13/POM121C/NUP88/NUP160/NUP54/SLC16A1/FOXK2/NUP107/NUP43/AAAS/PFKFB4/BSG/DLD/HKDC1/GALK1/ALDOC/PFKP/NUP155/PDHX/VDAC1/PCK2/EIF6/NUP85/NUP35/SEH1L/MLXIPL/SLC16A3/GIT1/PDHA1/NUP50/PFKFB2/RAE1/GLO1/ALDOA/DLAT/NUP188/NUP205/NUP37/LDHA/GPI/TPI1/PGK1/ENO1/GAPDH/PKM/NDC1/HK2
BP	GO:1901654	response to ketone	192	0.533226	1.68002	1.08538e-05	0.000108191	6.46389e-05	1917	tags=24%, list=10%, signal=22%	PLN/CCL19/CCL21/SFRP1/SERPINF1/THBS1/ADCY5/IGFBP7/SLIT3/PTN/TNC/CAV1/FBXO32/SLIT2/FOSB/DUSP1/RAMP2/AQP1/TXNIP/KLF9/MAOB/FIBIN/TGFB3/CCR7/MSN/NR3C1/TGFB1/KLF2/TGFBR3/FOXP2/GNAI1/EDN1/GNG2/PTGFR/PTGER2/AVPR1A/PRKAA2/TBXA2R/PTGER4/CYBB/AKR1B1/AR/TGFB2/MAP4K1/PTAFR/FOS
BP	GO:0045446	endothelial cell differentiation	106	0.603293	1.80071	1.08781e-05	0.0001083	6.4704e-05	2776	tags=45%, list=14%, signal=39%	ZEB1/CLDN5/PTN/S1PR1/FSTL1/S1PR3/PECAM1/CLIC4/HEG1/TMEM100/COL15A1/ARHGEF26/CXCR4/MYADM/MSN/PTPRS/PDE2A/CDH5/TIE1/ENG/PPP1R16B/APOLD1/RDX/NR2F2/SOX17/SOX18/PDPN/VCL/ACVRL1/NRP1/BMP6/COL18A1/ATOH8/NOTCH4/KDR/STC1/ROBO4/BMPR2/SCUBE1/RAP1A/PDE4D/HEY2/ACVR1/S1PR2/ADD1/GSTM3/BTG1/PLCB1
CC	GO:0098802	plasma membrane signaling receptor complex	181	0.540189	1.69687	1.09362e-05	0.000108744	6.49697e-05	3811	tags=38%, list=19%, signal=31%	EMILIN1/ITGA7/CD79A/ITGA9/ITGA8/RAMP2/RAMP1/ITGBL1/RAMP3/ITGA1/CD79B/ITGA5/CALCRL/CSF2RB/IL6ST/GRIK5/CHRNA3/ITGA11/ACVRL1/DLG4/OSMR/APBB1IP/PLP1/ITGAM/ITGAL/ITGB3/TLR1/CD4/CD3E/CACNG4/TRAF1/ITGA4/CD3D/IRS1/TGFBR1/BMPR1B/ITGB2/IL6R/GABBR1/CD40/ITGAX/ITGAV/CD6/CD8A/ITGB1/CNTFR/CD3G/ACVR1/TLR6/TRAT1/CPT1C/GRIN2A/ZAP70/ITGB5/IGF1R/OLFM2/INSR/IL2RB/BMPR1A/CD247/IL18R1/ITGA10/B2M/GRIK3/IL6/DLG2/NLGN1/I…
BP	GO:0003002	regionalization	322	0.476839	1.54126	1.09799e-05	0.000109044	6.5149e-05	4038	tags=32%, list=20%, signal=26%	SFRP2/GREM1/BARX1/SFRP1/FOXF1/HEYL/C3/ROR2/MEOX2/MEF2C/GPC3/SIX2/NRP2/BASP1/BHLHE41/HOXA4/GLI1/MAFB/FGF10/GLI3/ZBTB16/ROBO1/ISL1/PRKACB/WLS/PBX3/PBX1/MEOX1/SEMA3C/EGR2/NR2F2/SOX17/SMO/GLI2/EDN1/HOXA5/SMARCD3/CITED2/WNT2B/CDON/BTG2/ACVRL1/LEF1/HOXB2/CHRD/HHIP/ITGAM/PTCH1/HOXB4/HOXA3/SPRY1/FOXC2/TSHZ1/AR/HOXA2/C1QA/TGFBR1/BMPR2/NOTCH2/BMPR1B/FUZ/SEMA3A/HEY2/DYNC2H1/ACVR1/SKI/NBL1/GPR161/SCMH1/NOG/D…
BP	GO:0007611	learning or memory	228	0.517783	1.64612	1.11116e-05	0.000110217	6.58495e-05	3636	tags=35%, list=18%, signal=29%	TACR2/SERPINF1/CLDN5/PTN/ATP1A2/MAP1A/PRKAR2B/VIP/CCL11/SYT11/KIT/MEF2C/SLC2A4/ITGA5/NRXN3/NFATC4/EGR2/PRNP/BCHE/CNR1/NRXN2/BTG2/DLG4/CX3CR1/PJA2/PDE1B/FYN/SNAP25/APOE/VLDLR/KCNK2/S100B/ATXN1/TAC1/C1QL1/HTR2A/NPTX2/JUN/FOS/NLGN4Y/NLGN3/TMOD2/MUSK/SLC8A2/EGFR/NGF/PTPRZ1/GRPR/PRRT1/SYNGAP1/PPP3CB/NTRK2/GRIN2A/DKK1/PTCHD1/KALRN/GIP/SGK1/ZNF385A/PLCB1/GM2A/CAMK4/NLGN4X/ATP8A1/MEIS2/CRTC1/ARL6IP5/INSR…
BP	GO:0042100	B cell proliferation	96	0.612065	1.81266	1.15495e-05	0.000114421	6.83611e-05	2801	tags=43%, list=14%, signal=37%	CD79A/CR2/MS4A1/MEF2C/GPR183/GAPT/CD22/PTPRC/SASH3/IL7R/LEF1/TYROBP/BLK/NCKAP1L/MZB1/TLR4/BCL2/PLCL2/CD19/BTK/BST1/MNDA/BCL6/CARD11/IRS2/TNFRSF13C/CD180/TNFSF13B/CD40LG/FCRL3/CD40/CD74/IKZF3/TNFRSF13B/FCGR2B/NFATC2/CD38/INPP5D/ATM/CD81/ABL1
BP	GO:0031571	mitotic G1 DNA damage checkpoint	61	-0.581623	-1.96587	1.16694e-05	0.000115467	6.89862e-05	2109	tags=39%, list=11%, signal=35%	CARM1/CNOT10/CASP2/TRIAP1/PRMT1/CDK2/E2F4/CCND1/MUC1/PRKDC/CNOT11/RFWD3/CHEK2/TFDP1/E2F7/CDC25C/E2F8/PCNA/GTSE1/SFN/E2F1/CDK1/CCNB1/AURKA
BP	GO:0032944	regulation of mononuclear cell proliferation	216	0.520868	1.65361	1.17251e-05	0.000115876	6.92307e-05	3808	tags=44%, list=19%, signal=36%	CCL19/LRRC32/IGF2/MEF2C/GPR183/GPNMB/VCAM1/FGF10/IL6ST/TGFBR2/CD22/PRNP/PTPRC/SASH3/HLA-DPB1/TYROBP/BLK/IGF1/AIF1/NCKAP1L/TWSG1/MZB1/TLR4/HLA-DPA1/BCL2/BTK/CD4/SPN/VSIG4/RASAL3/BST1/MNDA/TNFSF8/BCL6/CARD11/CD3E/IRS2/TNFRSF13C/CD1D/MAPK8IP1/JAK3/STAT5B/PLA2G2D/CORO1A/LMO1/TAC1/LST1/TNFSF13B/CD28/CD40LG/EBI3/FCRL3/CD40/CLC/CD74/IKZF3/CD6/TNFRSF13B/CCR2/CD209/ANXA1/FCGR2B/CSF1/NFATC2/HLA-DMB/CCL5/CR…
BP	GO:0072413	signal transduction involved in mitotic cell cycle checkpoint	59	-0.60307	-2.03083	1.18298e-05	0.000116769	6.97639e-05	2109	tags=42%, list=11%, signal=38%	CARM1/CNOT10/CASP2/RINT1/TRIAP1/PRMT1/ZW10/CDK2/E2F4/MUC1/PRKDC/CNOT11/ZWILCH/CHEK2/TFDP1/E2F7/CDC25C/E2F8/PCNA/GTSE1/SFN/E2F1/CDK1/CCNB1/AURKA
CC	GO:0031594	neuromuscular junction	69	0.656043	1.8766	1.18601e-05	0.000116882	6.98316e-05	2311	tags=32%, list=12%, signal=28%	DES/TUBA1A/SPOCK1/PTN/PDZRN3/LAMA2/SYNC/SERPINE2/F2R/EPHA7/UTRN/POSTN/COL4A5/DLG4/SYNGR1/LAMB2/EPHA4/SV2A/SNTA1/MUSK/ITGB1/FCHSD2
BP	GO:0035195	gene silencing by miRNA	118	-0.473509	-1.81846	1.18846e-05	0.000116882	6.98316e-05	4603	tags=55%, list=23%, signal=42%	MAP2K2/NUP214/FXR1/POLR2A/ADAR/POLR2C/LIMD1/POLR2K/CNOT1/TP53/METTL3/MAP2K1/ELAVL1/CNOT6/POLR2I/NUP133/FMR1/DROSHA/CNOT7/POLR2G/NUP153/POM121/NUP93/POLR2E/POLR2B/EIF4E2/NUP62/NUP98/MYCN/POLR2J/SEC13/POM121C/NUP88/NUP160/NUP54/POLR2L/NUP107/NUP43/AAAS/AJUBA/AGO2/MOV10/TARBP2/PPARG/NUP155/POLR2D/DHX9/EIF6/NUP85/EIF4G1/NUP35/SEH1L/MRPL44/HNRNPA2B1/NUP50/SRRT/RAE1/NUP188/NUP205/POLR2H/NUP37/RAN/XPO5/…
BP	GO:0046031	ADP metabolic process	118	-0.473588	-1.81876	1.18846e-05	0.000116882	6.98316e-05	3034	tags=37%, list=15%, signal=32%	NUP153/PGAM1/POM121/NUP93/NUP62/NUP98/SEC13/POM121C/NUP88/NUP160/NUP54/FOXK2/NUP107/NUP43/AAAS/PFKFB4/HKDC1/GALK1/ALDOC/PFKP/NUP155/EIF6/NUP85/NUP35/SEH1L/AK2/MLXIPL/GIT1/NUP50/PFKFB2/RAE1/ALDOA/NUP188/NUP205/NUP37/LDHA/GPI/TPI1/PGK1/ENO1/GAPDH/PKM/NDC1/HK2
MF	GO:0017069	snRNA binding	43	-0.65623	-2.05264	1.19462e-05	0.000117345	7.01083e-05	4354	tags=60%, list=22%, signal=47%	CCNT1/SNRPB2/TUT1/DDX39B/SNRNP70/TOE1/GEMIN5/PRPF31/MEPCE/LSM8/SART3/COIL/NCBP2/HNRNPU/LSM3/SNRPD3/LSM7/EFTUD2/SNRPA/LSM2/SF3B3/DDX21/PRPF4/SNRPA1/LSM4/EIF5A
BP	GO:0032233	positive regulation of actin filament bundle assembly	60	0.682113	1.90757	1.20289e-05	0.000118015	7.05082e-05	2801	tags=47%, list=14%, signal=40%	SYNPO2/SFRP1/FLNA/FERMT2/SYNPO/MYOC/TGFB3/TPM1/LPAR1/EVL/ARHGEF15/NRP1/RGCC/PFN2/CX3CL1/SWAP70/ARHGEF10/TAC1/TGFBR1/LIMCH1/CCDC88A/APOA1/SORBS3/PLEK/GPR65/NOX4/PPM1F/ABL1
BP	GO:0003279	cardiac septum development	92	0.624227	1.83903	1.20762e-05	0.000118335	7.06996e-05	2541	tags=37%, list=13%, signal=32%	SLIT3/HEYL/SLIT2/HEG1/NRP2/ANK2/PDE2A/ROBO1/ISL1/TGFBR2/ENG/TGFBR3/PARVA/SEMA3C/SMO/ZFPM2/CITED2/NRP1/GJA5/RARB/LMO4/TGFBR1/TBX2/BMPR2/GATA3/TGFB2/NOTCH2/PLXND1/HEY2/NDST1/SMAD7/DHRS3/ACVR1/NOG
BP	GO:0051147	regulation of muscle cell differentiation	130	0.577774	1.76327	1.22484e-05	0.000119877	7.16211e-05	3324	tags=35%, list=17%, signal=30%	GREM1/RBPMS2/PI16/BOC/TMEM119/MYOCD/KIT/EFEMP2/RGS2/DMPK/IGF2/MEF2C/SMYD1/BHLHE41/TGFB1/RGS4/FZD7/ENG/EDN1/SMARCD3/CDON/IGF1/MEF2A/GPER1/AKAP6/BCL2/RBM24/NFATC1/HDAC5/PRDM6/HEY2/CDH2/HDAC9/NFATC2/MMP14/DKK1/MAPK11/BNIP2/ABL1/CAMK1/OLFM2/TCF23/MECP2/DLL1/FOXO4/HDAC4
BP	GO:0032206	positive regulation of telomere maintenance	50	-0.624167	-2.0224	1.23914e-05	0.00012113	7.23697e-05	3737	tags=50%, list=19%, signal=41%	PPP1R10/PNKP/NAF1/MAPKAPK5/SIRT6/ACD/NBN/XRCC5/NABP2/HNRNPD/HNRNPA1/MAPK15/HNRNPA2B1/CCT4/CCT2/TCP1/CCT7/CCT3/CCT8/CCT5/CCT6A/GNL3/DKC1/AURKB/NEK2
BP	GO:0046578	regulation of Ras protein signal transduction	183	0.532781	1.67194	1.24582e-05	0.000121636	7.2672e-05	3371	tags=38%, list=17%, signal=32%	TIMP2/KANK2/ARHGEF25/COL3A1/MYOC/HEG1/PDGFRB/LPAR1/PSD/DLC1/ITPKB/F2R/FGF10/F2RL3/ROBO1/RDX/F2RL2/P2RY8/RASIP1/ARHGAP24/NRP1/P2RY10/ARHGDIB/IGF1/MAPRE2/ABCA1/CYTH3/PIK3CG/APOE/RASAL3/KCTD10/SPRY1/BCL6/IRS2/RASA3/STARD8/LPAR6/STARD13/ARHGEF10/IQSEC1/RASGRF2/TGFB2/NOTCH2/AUTS2/CYTH4/APOA1/VAV1/GPR20/CSF1/NGF/GPR65/AKAP13/GPR174/SYNGAP1/MYO9B/GPR4/RASGRP4/PSD3/GPR17/ABL1/STMN3/DENND3/KITLG/PLCE1/GPR…
BP	GO:0006297	nucleotide-excision repair, DNA gap filling	23	-0.757092	-2.0866	1.25506e-05	0.000122391	7.31231e-05	1009	tags=48%, list=5%, signal=45%	POLE/RPA3/POLD3/RFC5/POLD1/LIG1/RFC2/RFC4/POLD2/RFC3/PCNA
BP	GO:0006368	transcription elongation from RNA polymerase II promoter	81	-0.538253	-1.94294	1.26239e-05	0.000122958	7.34617e-05	5905	tags=63%, list=30%, signal=44%	SUPT5H/ELOF1/GTF2H1/ELP4/CDK13/RNF8/WDR61/ERCC3/GTF2F1/CCNT1/ELL3/SHH/POLR2A/POLR2C/IWS1/POLR2K/CDC73/CCNK/PCID2/ENY2/POLR2I/CTR9/POLR2G/ERCC2/MNAT1/TCERG1/POLR2E/POLR2B/POLR2J/NCBP1/TCEA1/NCBP2/POLR2L/HNRNPU/CDK7/GTF2F2/SUPT16H/CDK12/EAF1/NELFB/NELFE/POLR2D/GTF2H3/LEO1/NELFA/NELFCD/ADRM1/SSRP1/WDR43/POLR2H/EZH2
BP	GO:0035924	cellular response to vascular endothelial growth factor stimulus	57	0.685392	1.89858	1.27489e-05	0.000124026	7.40996e-05	3285	tags=51%, list=17%, signal=43%	SMOC2/DCN/GAS1/RAMP2/ATP2B4/PDGFRB/PDGFRA/NRP2/VCAM1/ROBO1/VEGFC/EGR3/PRKD1/SEMA6A/NRP1/PIK3CD/KDR/VEGFB/GAB1/HSPB1/FLT4/NR4A1/ANXA1/ADAMTS12/FLT1/PGF/MYO1C/DLL1/FLT3
MF	GO:0070182	DNA polymerase binding	18	-0.820123	-2.11868	1.29618e-05	0.000125946	7.52469e-05	2276	tags=72%, list=12%, signal=64%	NABP2/SMARCA4/LONP1/HMGB1/PTGES3/HSP90AA1/NAT10/HSP90AB1/FANCD2/RAD51/FANCI/PCNA/CDT1
BP	GO:0007266	Rho protein signal transduction	127	0.57714	1.75397	1.30286e-05	0.000126314	7.54669e-05	3304	tags=42%, list=17%, signal=35%	NGFR/NTN1/KANK2/ARHGEF25/COL3A1/MYOC/RHOJ/HEG1/PDGFRB/COL1A2/CDC42EP3/LPAR1/DLC1/RHOB/F2R/F2RL3/ROBO1/F2RL2/ADRA2A/P2RY8/PDPN/RASIP1/AGTR1/NRP1/P2RY10/ARHGDIB/ABCA1/ARHGAP6/WAS/APOE/KCTD10/BCL6/ARHGAP29/STARD8/LPAR6/STARD13/ARHGEF10/RASGRF2/APOA1/GPR20/GPR65/ARHGAP1/AKAP13/GPR174/MYO9B/GPR4/GPR17/ABL1/GPR18/TAX1BP3/ROCK1/ARRB1/RHOU
BP	GO:0001656	metanephros development	82	0.631941	1.83845	1.30438e-05	0.000126314	7.54669e-05	2122	tags=34%, list=11%, signal=31%	GREM1/FBN1/WWTR1/PDGFRB/PDGFRA/GPC3/SIX2/BASP1/PKD2/TCF21/CD34/FGF10/GLI3/EGR1/FAT4/SOX17/SMO/PKD1/PTCH1/BCL2/LAMB2/SPRY1/FOXC2/ID3/AKR1B1/GATA3/ADIPOQ/RET
BP	GO:0002253	activation of immune response	437	0.454331	1.48468	1.30474e-05	0.000126314	7.54669e-05	3329	tags=32%, list=17%, signal=27%	C7/MFAP4/A2M/CLU/C1S/SERPING1/C1R/CD79A/C3/CFH/CR2/MS4A1/RFTN1/PRKCB/MEF2C/C4A/C4B/CCR7/THY1/CD79B/WIPF1/IGLL5/NR4A3/CFD/PRKACB/PROS1/CLEC10A/CD22/MUC6/PRNP/PTPRC/HLA-DQA1/ELMO1/VTN/ICAM2/PDE4B/HLA-DPB1/TYROBP/LAPTM5/BLK/NCKAP1L/RGCC/IFI16/C3AR1/FYN/CYFIP2/C5AR1/CFI/WAS/TLR4/HLA-DPA1/BCL2/PAX5/PLCL2/CD19/BTK/CD4/VSIG4/PIK3CD/MNDA/CARD11/CD3E/FPR3/STAP1/CD59/THEMIS2/PRKCH/CD3D/C1RL/HLA-DQA2/C1QA/K…
BP	GO:0015980	energy derivation by oxidation of organic compounds	250	-0.358396	-1.50229	1.30622e-05	0.000126314	7.54669e-05	4462	tags=46%, list=23%, signal=36%	PHKG2/UQCRB/SLC25A25/AKT1/NDUFB5/IFNG/UCN/NDUFV2/NDUFA2/GYS1/FAHD1/PASK/TP53/PARK7/GSK3B/MDH1/NDUFB10/NDUFA7/GSK3A/IDH3G/OXA1L/UQCRC2/NDUFB11/NDUFS5/PPP1CC/NDUFS1/UQCRQ/IREB2/NDUFS8/COX7B/COQ9/NDUFS7/SDHD/NDUFB2/ACO2/NDUFB6/DGUOK/COX7A2L/NDUFC1/NDUFA12/COX10/NDUFB4/NOA1/COX4I1/NDUFA10/PGM2/FXN/ETFA/COX15/KHK/COX6B1/NDUFA1/IDH3B/NDUFA9/SUCLG1/SDHB/SLC25A13/NDUFA8/NDUFAB1/VCP/GHITM/GPD2/NDUFA6/SUCL…
BP	GO:0090150	establishment of protein localization to membrane	330	-0.341912	-1.47433	1.37165e-05	0.000132484	7.9153e-05	4804	tags=45%, list=24%, signal=34%	RAB3IP/RPL31/AQP11/EMC7/RPS24/RPS29/RPS8/CALM3/CHP1/PEX3/RPL3/BAX/ZFAND2B/RPL6/RPS28/RPL9/RPL30/GOLGA4/RPS11/VPS37B/RPL36/RPS3A/RPS13/ZDHHC11/RPL4/RAB8A/YWHAQ/MMGT1/RPS17/GET4/TP53/RPL35A/RPL32/ZDHHC6/RPL41/ARFRP1/SEC61B/PEX5/RPL38/RPS10/OXA1L/EMC2/SEC16A/PAK1/RPS12/RPS16/RAB10/COX18/TIMM22/EMC1/RPL23A/SSR3/RPL18A/GGA1/RPS26/SAMM50/ZDHHC3/RPS4X/PEX16/CD24/CEMIP/RAB11A/RPS5/ATG3/CIB1/RPL24/ZDHHC11…
BP	GO:0016052	carbohydrate catabolic process	187	-0.409716	-1.68754	1.38109e-05	0.000133237	7.96028e-05	3230	tags=34%, list=16%, signal=28%	PFKL/FUT10/GK/NUP153/PGAM1/POM121/LRP5/NUP93/PGM2/NUP62/NUP98/KHK/SEC13/POM121C/NUP88/NUP160/GLB1/NUP54/FOXK2/GLYCTK/NUDT5/NUP107/NUP43/AAAS/ABHD10/GPD2/PFKFB4/HKDC1/GALK1/ALDOC/XYLB/PFKP/NUP155/RPE/FUT4/FUT2/EIF6/NUP85/HMGB1/PGD/NUP35/SEH1L/MLXIPL/GIT1/NUP50/GALE/PFKFB2/RAE1/PPP1CA/ALDOA/NUP188/NUP205/NUP37/LDHA/GPI/TPI1/PGK1/ENO1/GAPDH/PKM/SORD/NDC1/HK2
CC	GO:0043025	neuronal cell body	463	0.450716	1.47358	1.38516e-05	0.00013347	7.9742e-05	4255	tags=34%, list=22%, signal=27%	APOD/CRYAB/FLNA/AKAP12/SERPINF1/NDN/MAP1B/NGFR/TIMP2/SYNPO/ATP1A2/SNCG/ROR2/MAP1A/ITGA8/PRKAR2B/VIP/SYT11/TMEM100/C4A/TGFB3/LPAR1/PDE1A/ITGA1/CKB/THY1/PTPRS/CACNA1C/EPHA7/IL6ST/SST/LRP1/CD200/GRIK5/CHRNA3/STMN2/CD22/ELOVL5/KCND3/L1CAM/FEZ1/PAM/CNN3/OLFM1/NRP1/SORCS2/CX3CR1/TTLL7/CCR4/PLXDC1/CRMP1/BACE1/PDE1B/LRRK2/TNN/CX3CL1/KCNN3/SCN1B/SLC22A3/REG1A/PRKAA2/APOE/GAP43/RIN3/PDE9A/SLC8A1/CYBB/ITGA4…
BP	GO:0048545	response to steroid hormone	323	0.480877	1.55518	1.39651e-05	0.000134404	8.03e-05	2602	tags=25%, list=13%, signal=22%	SFRP1/SERPINF1/THBS1/IGFBP7/SLIT3/PTN/KANK2/CAV1/FBXO32/HEYL/ATP1A2/SLIT2/FOSB/DUSP1/RAMP2/FAM107A/AQP1/TXNIP/KLF9/MAOB/FIBIN/TGFB3/PER1/SPARC/TCF21/DAB2/NR4A3/NR3C1/CDO1/ISL1/SST/TGFB1/TGFBR2/ENG/CYP7B1/COL1A1/BCHE/EDN1/PAM/BMP6/LEF1/CALCOCO1/LOX/LMO3/GPER1/ZFP36/AVPR1A/BCL2/SCGB2A1/TFPI/STC1/CYBB/ALPL/AR/ADCYAP1/KDM5D/TGFB2/ZNF366/ZMIZ1/PTAFR/ZFP36L1/ADIPOQ/FOS/RBFOX2/PMEPA1/CRY2/ABCA3/SCNN1B/P…
BP	GO:0050654	chondroitin sulfate proteoglycan metabolic process	42	0.729921	1.95852	1.41788e-05	0.000136298	8.14318e-05	2364	tags=45%, list=12%, signal=40%	DCN/BGN/VCAN/CSPG4/SPOCK2/NDNF/CHST3/CSGALNACT2/CYTL1/CHST15/IDS/ARSB/DSE/DSEL/CHST7/CSGALNACT1/CHST11/CHSY3/XYLT1
BP	GO:2000351	regulation of endothelial cell apoptotic process	47	0.70856	1.92296	1.43089e-05	0.000137385	8.20814e-05	2258	tags=45%, list=11%, signal=40%	THBS1/RAMP2/CCL2/TEK/CDH5/ECSCR/SCG2/NDNF/SERPINE1/CD248/GAS6/RGCC/GPER1/KDR/ITGA4/ANGPT1/GATA3/SEMA5A/CD40LG/CD40/GATA2
MF	GO:0016891	endoribonuclease activity, producing 5'-phosphomonoesters	26	-0.740731	-2.10387	1.45364e-05	0.000139404	8.32876e-05	3670	tags=65%, list=19%, signal=53%	RPP38/DROSHA/POP5/ELAC2/DBR1/RPP21/POP4/AGO2/APEX1/RPP40/MRPL44/POP1/POP7/RPP25/RNASEH2A/EXO1/FEN1
BP	GO:0030204	chondroitin sulfate metabolic process	37	0.744645	1.93942	1.45958e-05	0.000139809	8.35293e-05	2364	tags=49%, list=12%, signal=43%	DCN/BGN/VCAN/CSPG4/SPOCK2/NDNF/CHST3/CSGALNACT2/CHST15/IDS/ARSB/DSE/DSEL/CHST7/CSGALNACT1/CHST11/CHSY3/XYLT1
BP	GO:0034471	ncRNA 5'-end processing	20	-0.783874	-2.06836	1.48281e-05	0.000141866	8.47582e-05	3670	tags=85%, list=19%, signal=69%	RPP38/NOP9/POP5/UTP20/RPP21/POP4/ABT1/SSB/TBL3/RPP40/HSD17B10/POP1/NOP14/TRMT10C/RPP25L/POP7/RPP25
BP	GO:0071805	potassium ion transmembrane transport	205	0.524033	1.65117	1.49119e-05	0.000142353	8.50491e-05	3926	tags=31%, list=20%, signal=25%	FHL1/FLNA/KCNMB1/KCNMA1/CASQ2/CAV1/ABCC9/ATP1A2/SLC24A3/AQP1/KCNE4/KCNJ8/PKD2/ANK2/ATP1B2/SLC9A9/KCNH2/RGS4/KCNK3/KCND3/KCNS3/TREM2/ATP4B/SNAP25/VAMP2/KCNN3/AKAP6/KCNA3/KCNA5/KCNE2/KCNK2/SLC12A4/ACTN2/KCNB1/ATP4A/AMIGO1/KCND1/ITGB1/NALCN/P2RY12/KCNJ5/KCNT2/KCNQ4/KCNAB1/KCNN4/ATP1A3/NEDD4/DPP6/KCNIP1/SLC12A6/KLHL24/KCNG1/PTEN/KCNJ15/KCNA1/KCNIP3/KCNAB2/ANO6/SLC9A4/KCNF1/CD63/KCNMB4/KCNIP2
BP	GO:0016073	snRNA metabolic process	42	-0.656376	-2.04637	1.49141e-05	0.000142353	8.50491e-05	6131	tags=69%, list=31%, signal=48%	RBM7/CT45A10/USB1/SAGE1/INTS6/ZCCHC8/INTS9/INTS4/INTS12/TUT1/TOE1/MEPCE/INTS5/NOP10/EXOSC10/INTS1/INTS2/EXOSC3/INTS8/NHP2/EXOSC7/EXOSC9/INTS7/EXOSC2/EXOSC5/INTS10/EXOSC8/EXOSC4/DKC1
BP	GO:0010951	negative regulation of endopeptidase activity	228	0.51392	1.63384	1.4938e-05	0.000142413	8.5085e-05	2360	tags=22%, list=12%, signal=20%	SFRP2/CRYAB/A2M/SERPINF1/THBS1/NGFR/SERPING1/CST2/SPOCK1/TIMP2/C3/TIMP3/AQP1/ITIH5/PCSK1N/PAPLN/LTF/SERPINE2/COL6A3/C4A/AGT/C4B/RECK/SPOCK2/TIMP1/PROS1/WFDC1/SPINK1/SERPINE1/LXN/PRNP/GAS6/CD27/CD109/VTN/HGF/SPINK4/IFI16/TFPI2/TFPI/CST7/CSTA/SPINK5/CRIM1/RARRES1/CST6/TNFAIP8/SNCA/NGF/COL4A3/TIMP4
MF	GO:0061135	endopeptidase regulator activity	184	0.531721	1.66808	1.50416e-05	0.000143231	8.55742e-05	2360	tags=24%, list=12%, signal=21%	SFRP2/A2M/SERPINF1/SERPING1/CST2/SPOCK1/TIMP2/C3/TIMP3/ITIH5/PCSK1N/PAPLN/LTF/SERPINE2/COL6A3/C4A/AGT/C4B/RECK/SPOCK2/TIMP1/PROS1/WFDC1/SPINK1/SERPINE1/LXN/PRNP/GAS6/CD27/CD109/SPINK4/TFPI2/TFPI/CST7/CSTA/SPINK5/CRIM1/RARRES1/CST6/TNFAIP8/SNCA/NGF/COL4A3/TIMP4
BP	GO:0010634	positive regulation of epithelial cell migration	141	0.556781	1.71502	1.51004e-05	0.000143454	8.57073e-05	2600	tags=39%, list=13%, signal=34%	SMOC2/FGF7/THBS1/FGFR1/AKT3/RHOJ/NRP2/ENPP2/AGT/RHOB/TEK/SPARC/SRPX2/FGF10/FGF2/VEGFC/TGFB1/TGFBR2/GLIPR2/EDN1/RRAS/PRKD1/ETS1/MAP3K3/NRP1/MAPRE2/ITGB3/ATOH8/PIK3CG/SASH1/PIK3CD/KDR/FOXC2/PTGS2/ANGPT1/TAC1/IQSEC1/BMPR2/GATA3/TGFB2/PLCG2/SEMA5A/HSPB1/FLT4/FGF18/CD40/NOS3/ANXA1/GATA2/HDAC9/STAT5A/RTN4/HAS2/PPM1F/FOXP1
BP	GO:0046605	regulation of centrosome cycle	46	-0.618767	-1.96986	1.51004e-05	0.000143454	8.57073e-05	3859	tags=50%, list=20%, signal=40%	PDCD6IP/CEP295/ATF5/CEP76/CHMP5/CHMP2B/XRCC3/CHMP1A/NUP62/CENPJ/CHORDC1/RBM14/CEP131/GEN1/NAT10/NPM1/KAT2A/BRCA1/CHMP4C/STIL/PLK4/CCNF/AURKA
BP	GO:0000966	RNA 5'-end processing	22	-0.782813	-2.12528	1.51924e-05	0.000144159	8.61283e-05	3670	tags=82%, list=19%, signal=67%	RPP38/NOP9/POP5/UTP20/RPP21/POP4/ABT1/SSB/TBL3/RPP40/HSD17B10/POP1/NOP14/TRMT10C/PNPT1/RPP25L/POP7/RPP25
BP	GO:0031102	neuron projection regeneration	54	0.678092	1.86543	1.52843e-05	0.000144861	8.65477e-05	2253	tags=39%, list=11%, signal=35%	APOD/RGMA/FLNA/MAP1B/PTN/JAM3/TNC/PRRX1/THY1/PTPRS/ISL1/LRP1/NREP/HGF/BCL2/GAP43/LAMB2/EPHA4/APOA1/CHL1/SCARF1
BP	GO:0050919	negative chemotaxis	46	0.703796	1.90246	1.53422e-05	0.000145239	8.67738e-05	2618	tags=50%, list=13%, signal=43%	SLIT3/NTN1/SLIT2/NRP2/ROBO1/EPHA7/SEMA3G/SEMA3C/PLXNA4/SEMA6A/FLRT2/SEMA6B/ITGB3/SEMA6D/SEMA6C/SEMA3E/SEMA5A/APOA1/ITGAV/SEMA3A/SEMA4C/UNC5C/SEMA7A
BP	GO:0048562	embryonic organ morphogenesis	274	0.491551	1.57932	1.54974e-05	0.000146367	8.74472e-05	2989	tags=25%, list=15%, signal=22%	EFEMP1/RBPMS2/HAND2/MFAP5/FRZB/FOXF1/FBN1/NTN1/ROR2/ALDH1A3/FOXF2/MEF2C/PRRX1/PDGFRA/SIX2/TGFB3/PKD2/TCF21/HOXA4/GLI1/CTHRC1/MAFB/FGF10/GLI3/TGFBR2/ENG/SOBP/SOX17/SMO/GLI2/EDN1/SOX18/HOXA5/NKX3-2/LRIG1/HOXB2/MFAP2/RBP4/TWIST1/RARB/PAX5/HOXB4/HOXA3/VANGL2/FOXC2/TSHZ1/HOXA2/TGFBR1/TBX2/GATA3/NOTCH2/MICAL2/FUZ/CHST11/GATA2/NDST1/SLITRK6/ACVR1/MMP14/RYR2/MMP16/NOG/EOMES/HLX/OSR1/FZD2/KCNQ4/TEAD2/HOXB3
BP	GO:0006418	tRNA aminoacylation for protein translation	26	-0.739263	-2.0997	1.54974e-05	0.000146367	8.74472e-05	2762	tags=88%, list=14%, signal=76%	SARS2/CARS2/HARS2/DALRD3/WARS2/PPA2/EARS2/AIMP1/VARS2/PARS2/TARS2/EEF1E1/YARS2/AARS2/PPA1/AIMP2/LARS2/NARS2/FARSB/FARSA/IARS2/MARS2/DARS2
BP	GO:2000779	regulation of double-strand break repair	72	-0.548165	-1.91947	1.55395e-05	0.000146592	8.75822e-05	4774	tags=53%, list=24%, signal=40%	TFIP11/MGMT/PARP3/FUS/PNKP/PARP9/SIRT7/RPA2/RIF1/SIRT6/OTUB2/MAD2L2/DTX3L/HMGA2/MAGEF1/WRAP53/SPIRE2/PPP4R2/FANCB/OTUB1/PPP4C/HSF1/KDM1A/PARP1/DDX11/DEK/PRKDC/UBQLN4/FIGNL1/RMI2/PARPBP/POLQ/CHEK1/AUNIP/RAD51/TIMELESS/RAD51AP1/FOXM1
BP	GO:0014902	myotube differentiation	96	0.607335	1.79865	1.60723e-05	0.000151443	9.04801e-05	3697	tags=39%, list=19%, signal=31%	JAM2/CACNA1H/TMEM119/MYOCD/EHD2/DMPK/MEF2C/PLEKHO1/SMYD1/BHLHE41/SMO/CD53/CDON/CAV2/IGF1/AVPR1A/BCL2/RBM24/HDAC5/HDAC9/MYEF2/NFATC2/SKI/MMP14/IL4R/MYOF/CD81/ADAM12/CFLAR/PLD3/MYH9/SCGB3A1/HDAC4/KLHL41/ACTA1/DYRK1B/P2RX2
BP	GO:0070199	establishment of protein localization to chromosome	23	-0.75276	-2.07466	1.61687e-05	0.000152174	9.09169e-05	3041	tags=70%, list=15%, signal=59%	ACD/PIH1D1/WRAP53/NABP2/LRWD1/BRCA2/CCT4/CCT2/TCP1/CCT7/RUVBL2/CCT3/CCT8/CCT5/CCT6A/DKC1
BP	GO:0045005	DNA-dependent DNA replication maintenance of fidelity	45	-0.640696	-2.04327	1.64417e-05	0.000154563	9.23443e-05	1388	tags=38%, list=7%, signal=35%	GEN1/DDX11/TIPIN/POLE/BRCA2/DONSON/BLM/RFWD3/POLD1/DNA2/EME1/TRAIP/ALYREF/RAD51/TIMELESS/PCNA/TONSL
BP	GO:0030239	myofibril assembly	58	0.682153	1.89663	1.69629e-05	0.000159121	9.50676e-05	2408	tags=34%, list=12%, signal=30%	MYH11/LMOD1/PGM5/CSRP1/CFL2/TMOD1/LDB3/PDGFRB/PDGFRA/TPM1/ACTC1/EDN1/CSRP2/OBSL1/MEF2A/ACTN2/TMOD2/FHOD3/CASQ1/AKAP13
BP	GO:0003014	renal system process	113	0.588154	1.76226	1.69659e-05	0.000159121	9.50676e-05	3752	tags=42%, list=19%, signal=35%	KCNMA1/ADCY5/PRKAR2B/AQP1/SULF1/GSN/MCAM/AGT/NPR1/CD34/F2R/GJA1/PRKACB/CHRNA3/EDNRB/GAS6/EDN1/AGTR1/GJA5/ADCY4/AVPR1A/BCL2/STC1/CORO2B/AKR1B1/TAC1/SULF2/ADIPOQ/ADCY9/AVPR2/GNAI2/NPR3/AQP3/HAS2/MAGED2/SGK1/PCSK5/ADCY2/RAB11FIP2/INPP5K/SUCNR1/CORIN/BTC/SERPINF2/KLHL3/PDGFB/PKN1/PRKAR1A
BP	GO:0043928	exonucleolytic catabolism of deadenylated mRNA	33	-0.688165	-2.045	1.7621e-05	0.000165074	9.86242e-05	4008	tags=67%, list=20%, signal=53%	LSM1/CNOT6/DCPS/EDC4/SKIV2L/HBS1L/DIS3/CNOT7/LSM6/EXOSC3/LSM3/EXOSC7/LSM7/EXOSC9/EXOSC2/EXOSC5/PATL1/LSM5/LSM2/EXOSC8/EXOSC4/LSM4
BP	GO:0032210	regulation of telomere maintenance via telomerase	50	-0.617582	-2.00107	1.77469e-05	0.000166061	9.9214e-05	3737	tags=50%, list=19%, signal=41%	NAF1/MAPKAPK5/EXOSC10/ACD/SRC/PINX1/XRCC5/SMG5/HNRNPU/HNRNPC/HNRNPA1/PIF1/MAPK15/CCT4/NAT10/CCT2/TCP1/CCT7/CCT3/CCT8/CCT5/CCT6A/DKC1/AURKB/NEK2
BP	GO:0009185	ribonucleoside diphosphate metabolic process	134	-0.454075	-1.77956	1.87653e-05	0.000175388	0.000104786	3230	tags=37%, list=16%, signal=31%	PFKL/TJP2/NUP153/PGAM1/POM121/CMPK1/NUP93/NUP62/NUP98/SEC13/POM121C/NUP88/NUP160/NUP54/FOXK2/NUDT5/NUP107/NUP43/AAAS/PFKFB4/HKDC1/GALK1/ALDOC/PFKP/NUP155/EIF6/NUP85/NUP35/SEH1L/AK2/MLXIPL/GIT1/NUP50/PFKFB2/RAE1/ALDOA/NUP188/NUP205/NUP37/ENTPD2/LDHA/GPI/TPI1/PGK1/ENO1/GAPDH/PKM/NDC1/HK2
BP	GO:0006378	mRNA polyadenylation	42	-0.652276	-2.03359	1.89399e-05	0.000176613	0.000105518	4880	tags=67%, list=25%, signal=50%	SYMPK/CCNT1/TUT1/CDC73/RNF40/CPSF2/SSU72/CTR9/CPSF6/CPSF7/PAPOLA/CLP1/NUDT21/FIP1L1/PABPC1L/MTPAP/CSTF3/HSF1/NELFE/LEO1/CPSF3/PABPC1/ZC3H3/CPSF1/GRSF1/SNRPA/PNPT1/CSTF2
BP	GO:0043631	RNA polyadenylation	42	-0.652276	-2.03359	1.89399e-05	0.000176613	0.000105518	4880	tags=67%, list=25%, signal=50%	SYMPK/CCNT1/TUT1/CDC73/RNF40/CPSF2/SSU72/CTR9/CPSF6/CPSF7/PAPOLA/CLP1/NUDT21/FIP1L1/PABPC1L/MTPAP/CSTF3/HSF1/NELFE/LEO1/CPSF3/PABPC1/ZC3H3/CPSF1/GRSF1/SNRPA/PNPT1/CSTF2
BP	GO:0016569	covalent chromatin modification	441	-0.313979	-1.39449	1.92146e-05	0.000178968	0.000106925	5168	tags=40%, list=26%, signal=30%	SRCAP/PARG/ZZZ3/EHMT1/KMT2B/PRMT7/MORC2/ZNF335/ZMPSTE24/HDAC10/PCGF6/AKAP8/MIER2/EYA3/ZNF451/SETDB1/BAZ2A/SETD1A/KANSL2/HDAC6/TAF12/BRD8/PCGF3/USP36/TRIM37/GTF2B/USP7/PCGF2/HDAC8/UBE2A/BAP1/SMARCAD1/ING5/UCN/PAXBP1/YEATS2/HDAC3/DDB2/PADI3/TAF6/KDM4A/PAGR1/MBD3/IWS1/HLCS/CDC73/EED/TP53/TET3/PARK7/PHF19/RNF40/SIRT7/PRKCD/ENY2/BAZ1B/TAF6L/PRDM4/BRD7/PWP1/RIF1/BRPF1/HR/CTR9/SUDS3/TAF5L/MTA1/CTCF/CHTO…
MF	GO:0043022	ribosome binding	51	-0.608613	-1.97334	1.9394e-05	0.000180274	0.000107705	3773	tags=57%, list=19%, signal=46%	GEMIN5/OXA1L/SPCS1/FMR1/EIF2A/MRPS27/BAG6/SRP72/SRP68/ERI1/SEC61A1/TACO1/YTHDF1/ZNF598/EIF6/PRMT3/NAA15/EIF2S1/GUF1/NAA10/HSPA5/EIF5AL1/RPN2/LETM1/RPSA/OLA1/EIF5A/C1QBP/ZC3H12A
BP	GO:0062125	regulation of mitochondrial gene expression	27	-0.740021	-2.09261	1.94e-05	0.000180274	0.000107705	4105	tags=78%, list=21%, signal=62%	COA3/RMND1/MRPS27/UQCC1/MPV17L2/MALSU1/MTG2/RPUSD4/FASTKD2/UQCC2/FASTKD3/TACO1/RPUSD3/CDK5RAP1/TRUB2/TSFM/TRMT10C/CHCHD10/C1QBP/LRPPRC/SHMT2
BP	GO:0034661	ncRNA catabolic process	32	-0.690205	-2.05094	1.94216e-05	0.000180274	0.000107705	3453	tags=50%, list=18%, signal=41%	DROSHA/DIS3/EXOSC10/SND1/EXOSC3/DDX49/EXOSC7/EXOSC9/EXOSC2/POP1/EXOSC5/PNPT1/NSUN2/EXOSC8/EXOSC4/ZC3H12A
BP	GO:1904816	positive regulation of protein localization to chromosome, telomeric region	12	-0.886226	-2.03644	1.95232e-05	0.000181009	0.000108145	830	tags=92%, list=4%, signal=88%	WRAP53/CCT4/CCT2/TCP1/CCT7/CCT3/CCT8/CCT5/CCT6A/GNL3/DKC1
BP	GO:0007187	G protein-coupled receptor signaling pathway, coupled to cyclic nucleotide second messenger	65	0.647338	1.8403	1.98433e-05	0.000183767	0.000109792	4158	tags=35%, list=21%, signal=28%	CCL2/AGT/CHRM2/CALCRL/CNR1/PTGIR/HTR2B/HTR2A/NPY1R/HRH2/NPY/ANXA1/PTH1R/CNR2/XCR1/CCR1/DRD1/HTR1B/ADRB3/SSTR2/CHRM3/DRD4/HTR7
BP	GO:0045165	cell fate commitment	242	0.502431	1.60869	2.03003e-05	0.000187784	0.000112192	3944	tags=33%, list=20%, signal=27%	SFRP2/SFRP1/GAS1/TGFB1I1/ROR2/MEF2C/PRRX1/SIX2/TOX/PTCH2/FGF10/GLI3/FGF2/ISL1/ZNF521/FZD7/WNT9A/NR2F2/SOX17/SMO/GLI2/SOX18/PDPN/WNT2B/CDON/MITF/EPAS1/NRP1/SLAMF6/PTCH1/BCL2/NOTCH4/GAP43/SPN/LMO4/FOXC2/AR/HOXA2/TGFBR1/TBX2/GATA3/NOTCH2/IL6R/IRF4/TENM4/HEY2/GATA2/EBF2/ISL2/LY9/ACVR1/SOX8/DKK1/CTSL/EOMES/SOX5/PRDM1/FEV/DHH/TAL1/SLAMF8/DLL1/TNFSF18/ONECUT2/BMPR1A/GATA5/EYA2/SOSTDC1/NKX6-2/FOXP3/GDF7/…
BP	GO:0051279	regulation of release of sequestered calcium ion into cytosol	73	0.640251	1.83642	2.03825e-05	0.000188329	0.000112518	2492	tags=36%, list=13%, signal=31%	PLN/JPH2/CASQ2/ATP1A2/APLNR/PKD2/DMD/THY1/ANK2/CLIC2/F2R/F2RL3/CACNA1C/TRPC1/GPER1/CX3CL1/AKAP6/CD19/SLC8A1/CORO1A/GSTM2/BDKRB1/PDE4D/CASQ1/SNCA/RYR2
BP	GO:0014033	neural crest cell differentiation	90	0.619395	1.8178	2.07121e-05	0.000191156	0.000114207	3282	tags=43%, list=17%, signal=36%	SFRP1/HAND2/FRZB/EDNRA/ANXA6/FN1/MEF2C/NRP2/ISL1/SEMA3G/SEMA3C/EDNRB/SMO/EDN1/SEMA6A/NRP1/SNAI2/SEMA6B/TWIST1/HTR2B/FOXC2/SEMA6D/SEMA6C/FAM172A/SEMA3E/SEMA5A/RET/NRTN/SEMA3A/CDH2/SEMA4C/ACVR1/SOX8/SEMA7A/FBXL17/KITLG/BMPR1A/FOLR1/SEMA5B
MF	GO:0005262	calcium channel activity	115	0.577102	1.74084	2.09729e-05	0.000193342	0.000115513	3292	tags=26%, list=17%, signal=22%	CACNA1H/SLC24A3/ANXA6/CACNA2D1/PKD2/NCS1/CACNA1C/ITPR1/CACNB2/CNR1/PKD1/TRPC1/CACNG4/RASA3/TMEM37/TRPC4/ITGAV/ITPR2/TRPV2/RYR2/GRIN2A/ORAI2/CACNA2D3/GPM6A/TRPC6/CACNA2D2/HTR1B/ORAI3/CACNB3/RYR3
CC	GO:0000940	condensed chromosome outer kinetochore	14	-0.85159	-2.0496	2.09968e-05	0.000193342	0.000115513	188	tags=64%, list=1%, signal=64%	SPDL1/NDC80/SKA1/BUB1B/CENPF/SKA3/BUB1/PLK1/CCNB1
BP	GO:0007339	binding of sperm to zona pellucida	43	-0.64782	-2.02633	2.10277e-05	0.000193407	0.000115552	2484	tags=26%, list=13%, signal=22%	VDAC2/ZP3/PCSK4/CCT4/ALDOA/CCT2/TCP1/CCT7/CCT3/CCT8/CCT5
BP	GO:0060389	pathway-restricted SMAD protein phosphorylation	64	0.654063	1.85015	2.10869e-05	0.000193731	0.000115745	3236	tags=48%, list=16%, signal=41%	GREM1/EMILIN1/RBPMS/TGFB3/DAB2/TGFB1/TGFBR2/ENG/TGFBR3/LDLRAD4/ACVRL1/BMP6/INHBA/BMP3/TWSG1/GDF10/TGFBR1/BMPR2/TGFB2/PMEPA1/SMAD7/PBLD/ACVR1/BMPER/NOG/DKK1/BMP8A/LEFTY2/GDF6/INHBB/BMPR1A
BP	GO:0045778	positive regulation of ossification	46	0.699314	1.89034	2.13481e-05	0.000195909	0.000117046	1887	tags=41%, list=10%, signal=37%	TMEM119/PTN/LTF/MEF2C/TGFB3/ZBTB16/TGFB1/BMP6/GPM6B/ALOX5/SLC8A1/ADRB2/PKDCC/TAC1/BMPR2/TGFB2/P2RX7/KL/BMPR1B
BP	GO:0043405	regulation of MAP kinase activity	300	0.48233	1.55347	2.1558e-05	0.000197611	0.000118063	3297	tags=32%, list=17%, signal=27%	SFRP2/CCL19/SFRP1/THBS1/IGFBP6/CAV1/DUSP1/ROR2/FGFR1/KIT/RGS2/PDGFRB/TGFB3/MDFIC/LPAR1/CSPG4/AGT/CXCR4/ITGA1/UCHL1/FGF10/ROBO1/FGF2/PDGFD/IL34/TGFB1/GHR/GADD45B/RGS4/FZD4/DUSP5/ADRA2A/PTPRC/EDN1/GHRL/MAPK10/PDGFC/SHC2/IGF1/HGF/LRRK2/C5AR1/TLR4/PIK3CG/SASH1/APOE/CXCL17/HTR2B/SPRY1/PEA15/EPHA4/MAPK8IP1/MAP3K12/SMPD1/LAX1/MAP4K1/HTR2A/CD40LG/ADIPOQ/DUSP3/PIK3R5/FGF18/CD40/HIPK3/CD74/RET/FGD2/TIAM1/S…
BP	GO:0072431	signal transduction involved in mitotic G1 DNA damage checkpoint	56	-0.583388	-1.94604	2.1644e-05	0.000197951	0.000118267	2109	tags=39%, list=11%, signal=35%	CARM1/CNOT10/CASP2/TRIAP1/PRMT1/CDK2/E2F4/MUC1/PRKDC/CNOT11/CHEK2/TFDP1/E2F7/CDC25C/E2F8/PCNA/GTSE1/SFN/E2F1/CDK1/CCNB1/AURKA
BP	GO:1902400	intracellular signal transduction involved in G1 DNA damage checkpoint	56	-0.583388	-1.94604	2.1644e-05	0.000197951	0.000118267	2109	tags=39%, list=11%, signal=35%	CARM1/CNOT10/CASP2/TRIAP1/PRMT1/CDK2/E2F4/MUC1/PRKDC/CNOT11/CHEK2/TFDP1/E2F7/CDC25C/E2F8/PCNA/GTSE1/SFN/E2F1/CDK1/CCNB1/AURKA
MF	GO:0005179	hormone activity	116	0.576757	1.74163	2.19334e-05	0.000200372	0.000119713	3066	tags=25%, list=16%, signal=21%	FBN1/VIP/IGF2/AGT/SST/CARTPT/EDN1/GHRL/INHBA/IGF1/FNDC5/GRP/STC1/ADCYAP1/PTHLH/CHGB/KL/PENK/ADIPOQ/NPY/NPPC/PNOC/SCT/TTR/MLN/GIP/GCG/POMC/INHBB
BP	GO:0010717	regulation of epithelial to mesenchymal transition	90	0.618074	1.81392	2.20168e-05	0.000200906	0.000120032	2376	tags=38%, list=12%, signal=33%	SFRP2/GREM1/SFRP1/FERMT2/DACT3/TGFB1I1/WWTR1/EPHA3/TGFB3/PHLDB2/DAB2/ISL1/TGFB1/TGFBR2/ENG/COL1A1/LDLRAD4/GLIPR2/PHLDB1/VASN/PDPN/OLFM1/LEF1/RGCC/TWIST1/SPRY1/TGFBR1/GATA3/TGFB2/FUZ/TIAM1/SMAD7/PBLD/ACVR1
BP	GO:1902402	signal transduction involved in mitotic DNA damage checkpoint	57	-0.589067	-1.97686	2.22866e-05	0.000202911	0.00012123	2109	tags=40%, list=11%, signal=36%	CARM1/CNOT10/CASP2/RINT1/TRIAP1/PRMT1/CDK2/E2F4/MUC1/PRKDC/CNOT11/CHEK2/TFDP1/E2F7/CDC25C/E2F8/PCNA/GTSE1/SFN/E2F1/CDK1/CCNB1/AURKA
BP	GO:1902403	signal transduction involved in mitotic DNA integrity checkpoint	57	-0.589067	-1.97686	2.22866e-05	0.000202911	0.00012123	2109	tags=40%, list=11%, signal=36%	CARM1/CNOT10/CASP2/RINT1/TRIAP1/PRMT1/CDK2/E2F4/MUC1/PRKDC/CNOT11/CHEK2/TFDP1/E2F7/CDC25C/E2F8/PCNA/GTSE1/SFN/E2F1/CDK1/CCNB1/AURKA
BP	GO:0043277	apoptotic cell clearance	50	0.692739	1.88818	2.26893e-05	0.000206345	0.000123281	3000	tags=48%, list=15%, signal=41%	THBS1/C3/AXL/CCL2/C4A/C4B/CD36/LRP1/MFGE8/GAS6/PEAR1/TYROBP/TREM2/ITGB3/TGM2/RHOBTB1/RHOH/FCN1/MERTK/ITGAV/ANXA1/RARA/RAC2/RHOBTB2
BP	GO:0000027	ribosomal large subunit assembly	26	-0.732784	-2.08129	2.31859e-05	0.000210625	0.000125839	4562	tags=81%, list=23%, signal=62%	RPL3/MDN1/RPL6/RSL24D1/MRPL20/RPL38/RPL23A/RPL24/FASTKD2/TRAF7/DHX30/PPAN/RPLP0/DDX28/RPF2/MRTO4/BRIX1/NLE1/NOP2/RRS1/BOP1
BP	GO:0040029	regulation of gene expression, epigenetic	131	-0.436079	-1.71364	2.33829e-05	0.000212176	0.000126765	4177	tags=46%, list=21%, signal=36%	POLR2K/RBM15B/EED/TAF1A/METTL3/PHF19/UPF1/BAZ1B/TBP/RIF1/GSK3A/MTA1/TRIM27/CTCF/MORF4L2/ZFP57/SIRT6/SPHK2/MTF2/EXOSC10/CTBP1/RBBP4/DPY30/RBBP7/RBM15/SMARCD1/CREBZF/POLR1E/PCGF1/PABPC1L/POLR2E/GLMN/TDG/POLR2L/POLR1A/HNRNPU/TAF1D/HAT1/DOT1L/MYBBP1A/SUZ12/KDM1B/HMGB1/HDAC2/DEK/POLR1B/DNMT1/DNMT3B/DDX21/KAT2A/POLR2H/BRCA1/POLR1C/CHEK1/CDCA4/KCNQ1/EZH2/ATAD2/HMGA1/CDC45
BP	GO:0060325	face morphogenesis	29	0.76766	1.92671	2.34532e-05	0.000212576	0.000127004	2541	tags=48%, list=13%, signal=42%	CLDN5/MMP2/CRISPLD2/PDGFRA/CRISPLD1/TGFB3/COL1A1/RRAS/LEF1/SCX/ARID5B/CSRNP1/SKI/NOG
MF	GO:0042562	hormone binding	82	0.625552	1.81986	2.35447e-05	0.000213167	0.000127357	3760	tags=46%, list=19%, signal=38%	ATP1A2/RAMP2/RAMP1/ALDH1A3/NPR1/NR3C1/CALCRL/GHR/LEPR/EDNRB/NPR2/INHBA/GPER1/VIPR2/AVPR1A/ALDH1A1/AR/GLP2R/PIK3R1/EBI3/THRB/NPR3/MLNR/EGFR/PTH1R/CCKAR/ACVR1/TTR/IGF1R/ECE1/SCTR/INSR/ATP1A3/CCKBR/ADCYAP1R1/CDH13/SLC40A1/OXTR
CC	GO:0032982	myosin filament	22	0.822123	1.95231	2.36995e-05	0.000214328	0.000128051	903	tags=18%, list=5%, signal=17%	MYH11/ACTG2/MYH10/MYOM1
BP	GO:0065002	intracellular protein transmembrane transport	50	-0.612765	-1.98546	2.40103e-05	0.000216897	0.000129586	3946	tags=58%, list=20%, signal=47%	PEX2/DNAJC19/SEC61B/TOMM40L/PEX10/PEX5/PEX1/PEX16/TOMM20/PEX14/TIMM23/SRP54/SEC61G/TIMM21/SEC61A1/GRPEL2/ROMO1/TIMM17B/TIMM50/TIMM44/CHCHD4/PEX7/TIMM17A/DNAJC15/HSPA5/GRPEL1/AIFM1/TOMM40/HSPD1
MF	GO:0090079	translation regulator activity, nucleic acid binding	101	-0.479786	-1.7702	2.42954e-05	0.000219227	0.000130978	4316	tags=49%, list=22%, signal=38%	MTRF1/GSPT1/EIF2B4/GTPBP2/EEF1D/ABCF1/EEFSEC/EIF5/HBS1L/EIF2A/EIF2B2/EIF3H/EIF3A/EIF2B5/EIF3J/EIF1AD/EIF4H/EIF4E2/COPS5/EEF1B2/DENR/SHMT1/EIF3D/LARP1/EIF4E/EIF3M/AGO2/EIF2S3/EIF3E/PAIP1/MCTS1/TSFM/EIF6/GFM1/PABPC1/EIF4G1/EIF3I/EIF2S1/TUFM/EIF2S2/EIF1AX/EIF3B/EIF5AL1/MTIF2/DHFR/EIF5A/C1QBP/SHMT2/TYMS
BP	GO:1903034	regulation of response to wounding	151	0.551731	1.70527	2.44356e-05	0.000220247	0.000131587	2262	tags=30%, list=11%, signal=27%	MYLK/SMOC2/RGMA/FLNA/THBS1/FERMT2/SERPING1/PTN/CAV1/SERPINE2/PDGFRA/PHLDB2/THBD/CXCR4/PRKG1/CD34/CD36/PTPRS/F2R/GJA1/FGF2/PROS1/LRP1/C1QTNF1/WFDC1/SERPINE1/ADRA2A/EDN1/PLAT/FAP/CD109/VTN/ST3GAL4/ALOX5/APOE/TFPI/TBXA2R/FOXC2/EPHA4/TSPAN8/NOS3/ANXA1/SH2B3/SCARF1/ITGB1
BP	GO:0009123	nucleoside monophosphate metabolic process	71	-0.54669	-1.89756	2.55237e-05	0.000229799	0.000137294	3193	tags=44%, list=16%, signal=37%	AK7/TJP2/DGUOK/ADK/CMPK1/NT5C/ADSL/DUT/NUDT2/PRPS2/PFAS/UCKL1/APRT/DCK/GART/UMPS/IMPDH2/AK2/IMPDH1/DNPH1/CAD/GMPS/HPRT1/UCK2/ENTPD8/ATIC/DTYMK/PPAT/PAICS/TYMS/TK1
CC	GO:0005758	mitochondrial intermembrane space	78	-0.520689	-1.86487	2.56963e-05	0.000231095	0.000138069	4012	tags=56%, list=20%, signal=45%	PARK7/HAX1/COX17/NDUFS5/MICU2/NDUFS1/COX19/CHCHD7/PRELID2/OPA1/GFER/CLPB/TIMM9/TIMM23/LYN/UQCC2/NLN/NDUFA8/CIAPIN1/IMMT/SOD1/CHCHD4/TIMM8B/TRIAP1/PRELID1/CHCHD2/TIMM8A/AK2/COA7/TIMM10/COA4/TIMM13/PNPT1/COA6/CPOX/CHCHD10/TRAP1/AIFM1/THOP1/CYCS/STOML2/DTYMK/CDC25C/SHMT2
BP	GO:1901019	regulation of calcium ion transmembrane transporter activity	76	0.637719	1.83916	2.59831e-05	0.000233415	0.000139455	2199	tags=32%, list=11%, signal=28%	PLN/JPH2/CASQ2/GEM/RRAD/ATP1A2/CACNA2D1/PKD2/DMD/ANK2/CLIC2/HSPA2/AHNAK/REM1/ADRA2A/EHD3/CACNB2/PDE4B/AKAP6/KCNE2/PLCG2/GSTM2/PDE4D/CASQ1
BP	GO:0090503	RNA phosphodiester bond hydrolysis, exonucleolytic	41	-0.644518	-1.98524	2.62831e-05	0.000235849	0.000140909	4281	tags=56%, list=22%, signal=44%	ANGEL1/CNOT1/ERI3/CNOT6/DCPS/TOE1/DIS3/CNOT7/EXOSC10/XRN2/ERI2/ERI1/PDE12/EXOSC3/ISG20L2/EXOSC7/EXOSC9/EXOSC2/EXOSC5/PNPT1/EXOSC8/EXOSC4/ZC3H12A
BP	GO:1902107	positive regulation of leukocyte differentiation	151	0.551061	1.7032	2.69258e-05	0.000241081	0.000144035	3089	tags=40%, list=16%, signal=34%	CCL19/ROR2/AXL/TOX/ITPKB/EVI2B/GLI3/ZBTB16/IL34/TGFB1/TGFBR2/EGR3/GAS6/PTPRC/CD27/GLI2/HCLS1/GPR68/SASH3/IL7R/LEF1/TYROBP/TREM2/NCKAP1L/BTK/CD4/BCL6/KLF10/STAT5B/GATA3/NOTCH2/FES/ZMIZ1/TESPA1/JUN/ZFP36L1/FOS/RHOH/HLA-DRA/CD74/ANXA1/CSF1/MMP14/CR1/CA2/RARA/HLA-DRB1/ZAP70/IL4R/CD86/SOCS5/INPP5D/HLX/NLRP3/TNFSF4/CD83/CCR1/PIK3R6/KITLG/TNFSF11
BP	GO:1903708	positive regulation of hemopoiesis	151	0.551061	1.7032	2.69258e-05	0.000241081	0.000144035	3089	tags=40%, list=16%, signal=34%	CCL19/ROR2/AXL/TOX/ITPKB/EVI2B/GLI3/ZBTB16/IL34/TGFB1/TGFBR2/EGR3/GAS6/PTPRC/CD27/GLI2/HCLS1/GPR68/SASH3/IL7R/LEF1/TYROBP/TREM2/NCKAP1L/BTK/CD4/BCL6/KLF10/STAT5B/GATA3/NOTCH2/FES/ZMIZ1/TESPA1/JUN/ZFP36L1/FOS/RHOH/HLA-DRA/CD74/ANXA1/CSF1/MMP14/CR1/CA2/RARA/HLA-DRB1/ZAP70/IL4R/CD86/SOCS5/INPP5D/HLX/NLRP3/TNFSF4/CD83/CCR1/PIK3R6/KITLG/TNFSF11
CC	GO:0034702	ion channel complex	293	0.482638	1.55405	2.7028e-05	0.00024162	0.000144357	3926	tags=27%, list=20%, signal=22%	KCNMB1/KCNMA1/CASQ2/CACNA1H/ABCC9/GABRP/KCNE4/CLIC4/KCNJ8/CACNA2D1/PKD2/CLIC2/HSPA2/CACNA1C/KCNH2/GRIK5/CHRNA3/SCN4B/KCND3/CLIC6/SCN7A/CACNB2/KCNS3/PDE4B/DLG4/PKD1/TRPC1/SNAP25/VAMP2/TTYH2/SCN1B/AKAP6/KCNA3/KCNA5/GLRB/MICU3/CACNG4/KCNE2/KCNK2/LRRC8C/KCNB1/TRPC4/AMIGO1/KCND1/PDE4D/SCNN1B/CPT1C/RYR2/GRIN2A/KCNJ5/CACNA2D3/KCNQ4/OLFM2/TRPC6/KCNAB1/ANO1/CACNA2D2/KCNN4/CACNB3/GABRE/RYR3/DPP6/KCNIP1/SCN…
MF	GO:0004540	ribonuclease activity	104	-0.492359	-1.83256	2.70457e-05	0.00024162	0.000144357	4281	tags=48%, list=22%, signal=38%	ANGEL1/CNOT1/ERI3/CNOT6/DCPS/TOE1/RPP38/DROSHA/POP5/DIS3/CNOT7/RCL1/PPP1R8/EXOSC10/ELAC2/DBR1/XRN2/ERI2/LACTB2/RPP21/ERI1/PDE12/POP4/PIWIL1/TSEN34/HELZ2/SND1/EXOSC3/AGO2/ISG20L2/APEX1/EXOSC7/CPSF3/EXOSC9/NOB1/RPP40/TSN/EXOSC2/MRPL44/POP1/EXOSC5/PNPT1/EXOSC4/ENDOG/POP7/RPP25/RNASEH2A/EXO1/ZC3H12A/FEN1
[truncated: 1,886 more rows]

## Sheet: Sheet2
ID	Description	setSize	enrichmentScore	NES	pvalue	p.adjust	qvalues	rank	leading_edge	core_enrichment
[truncated: 132 more rows]
