# Supplementary material for: Prognostic value of RNA methylation-related genes in gastric adenocarcinoma based on bioinformatics
Source: PeerJ. 2024 Feb 29;12:e16951. doi: 10.7717/peerj.16951 (PMC10909369; doi:10.7717/peerj.16951)
Supplement: Supplemental Information 22 [file peerj-12-16951-s022.xlsx]

## Sheet: SYBR
	Well	Fluor	Target	Content	Sample	End RFU	Call	Sample Type	CallType	Is Control
	A01	SYBR		Unkn		998.88		Unknown	Unassigned	False
	A02	SYBR		Unkn		1022.59		Unknown	Unassigned	False
	A03	SYBR		Unkn		1043.96		Unknown	Unassigned	False
	A04	SYBR		Unkn		993.434		Unknown	Unassigned	False
	A05	SYBR		Unkn		958.405		Unknown	Unassigned	False
	A06	SYBR		Unkn		1057.13		Unknown	Unassigned	False
	A07	SYBR		Unkn		1200.92		Unknown	Unassigned	False
	A08	SYBR		Unkn		1170.07		Unknown	Unassigned	False
	A09	SYBR		Unkn		1164.4		Unknown	Unassigned	False
	A10	SYBR		Unkn		994.561		Unknown	Unassigned	False
	A11	SYBR		Unkn		852.501		Unknown	Unassigned	False
	A12	SYBR		Unkn		759.472		Unknown	Unassigned	False
	B01	SYBR		Unkn		19.0934		Unknown	Unassigned	False
	B02	SYBR		Unkn		-0.0449851		Unknown	Unassigned	False
	B03	SYBR		Unkn		6.41113		Unknown	Unassigned	False
	B04	SYBR		Unkn		14.8348		Unknown	Unassigned	False
	B05	SYBR		Unkn		100.11		Unknown	Unassigned	False
	B06	SYBR		Unkn		155.729		Unknown	Unassigned	False
	B07	SYBR		Unkn		85.0879		Unknown	Unassigned	False
	B08	SYBR		Unkn		36.3855		Unknown	Unassigned	False
	B09	SYBR		Unkn		86.189		Unknown	Unassigned	False
	B10	SYBR		Unkn		-0.557756		Unknown	Unassigned	False
	B11	SYBR		Unkn		27.7518		Unknown	Unassigned	False
	B12	SYBR		Unkn		5.87795		Unknown	Unassigned	False
	C01	SYBR		Unkn		1038.31		Unknown	Unassigned	False
	C02	SYBR		Unkn		998.542		Unknown	Unassigned	False
	C03	SYBR		Unkn		1213.63		Unknown	Unassigned	False
	C04	SYBR		Unkn		1062.89		Unknown	Unassigned	False
	C05	SYBR		Unkn		1069.66		Unknown	Unassigned	False
	C06	SYBR		Unkn		1061.82		Unknown	Unassigned	False
	C07	SYBR		Unkn		1274.45		Unknown	Unassigned	False
	C08	SYBR		Unkn		1364.21		Unknown	Unassigned	False
	C09	SYBR		Unkn		1370.25		Unknown	Unassigned	False
	C10	SYBR		Unkn		682.771		Unknown	Unassigned	False
	C11	SYBR		Unkn		776.915		Unknown	Unassigned	False
	C12	SYBR		Unkn		647.304		Unknown	Unassigned	False
	D01	SYBR		Unkn		955.627		Unknown	Unassigned	False
	D02	SYBR		Unkn		1074.83		Unknown	Unassigned	False
	D03	SYBR		Unkn		1114.59		Unknown	Unassigned	False
	D04	SYBR		Unkn		1141.82		Unknown	Unassigned	False
	D05	SYBR		Unkn		989.493		Unknown	Unassigned	False
	D06	SYBR		Unkn		1180.43		Unknown	Unassigned	False
	D07	SYBR		Unkn		1504.9		Unknown	Unassigned	False
	D08	SYBR		Unkn		1366.68		Unknown	Unassigned	False
	D09	SYBR		Unkn		1308.7		Unknown	Unassigned	False
	D10	SYBR		Unkn		1198.92		Unknown	Unassigned	False
	D11	SYBR		Unkn		1163.48		Unknown	Unassigned	False
	D12	SYBR		Unkn		1180.51		Unknown	Unassigned	False
	E01	SYBR		Unkn		1030.34		Unknown	Unassigned	False
	E02	SYBR		Unkn		1274.45		Unknown	Unassigned	False
	E03	SYBR		Unkn		1337.65		Unknown	Unassigned	False
	E04	SYBR		Unkn		1086.73		Unknown	Unassigned	False
	E05	SYBR		Unkn		1149.48		Unknown	Unassigned	False
	E06	SYBR		Unkn		1176.04		Unknown	Unassigned	False
	E07	SYBR		Unkn		1364.97		Unknown	Unassigned	False
	E08	SYBR		Unkn		1272.65		Unknown	Unassigned	False
	E09	SYBR		Unkn		1353.71		Unknown	Unassigned	False
	E10	SYBR		Unkn		1176.78		Unknown	Unassigned	False
	E11	SYBR		Unkn		1208.12		Unknown	Unassigned	False
	E12	SYBR		Unkn		1149.74		Unknown	Unassigned	False
	F01	SYBR		Unkn		0.674354		Unknown	Unassigned	False
	F02	SYBR		Unkn		-0.596744		Unknown	Unassigned	False
	F03	SYBR		Unkn		0.11842		Unknown	Unassigned	False
	F04	SYBR		Unkn		-1.03627		Unknown	Unassigned	False
	F05	SYBR		Unkn		-0.555476		Unknown	Unassigned	False
	F06	SYBR		Unkn		0.573861		Unknown	Unassigned	False
	F07	SYBR		Unkn		-0.810438		Unknown	Unassigned	False
	F08	SYBR		Unkn		0.329661		Unknown	Unassigned	False
	F09	SYBR		Unkn		-2.0834		Unknown	Unassigned	False
	F10	SYBR		Unkn		-0.0778776		Unknown	Unassigned	False
	F11	SYBR		Unkn		-1.90978		Unknown	Unassigned	False
	F12	SYBR		Unkn		1.15988		Unknown	Unassigned	False
	G01	SYBR		Unkn		1.37375		Unknown	Unassigned	False
	G02	SYBR		Unkn		-0.132953		Unknown	Unassigned	False
	G03	SYBR		Unkn		-1.04348		Unknown	Unassigned	False
	G04	SYBR		Unkn		-0.110501		Unknown	Unassigned	False
	G05	SYBR		Unkn		-0.152788		Unknown	Unassigned	False
	G06	SYBR		Unkn		-0.409934		Unknown	Unassigned	False
	G07	SYBR		Unkn		0.398625		Unknown	Unassigned	False
	G08	SYBR		Unkn		-0.0681178		Unknown	Unassigned	False
	G09	SYBR		Unkn		-1.19096		Unknown	Unassigned	False
	G10	SYBR		Unkn		0.291519		Unknown	Unassigned	False
	G11	SYBR		Unkn		-1.84522		Unknown	Unassigned	False
	G12	SYBR		Unkn		1.94483		Unknown	Unassigned	False
	H01	SYBR		Unkn		0.617113		Unknown	Unassigned	False
	H02	SYBR		Unkn		1.09803		Unknown	Unassigned	False
	H03	SYBR		Unkn		1.01505		Unknown	Unassigned	False
	H04	SYBR		Unkn		0.344679		Unknown	Unassigned	False
	H05	SYBR		Unkn		-0.348579		Unknown	Unassigned	False
	H06	SYBR		Unkn		-0.267727		Unknown	Unassigned	False
	H07	SYBR		Unkn		-0.916145		Unknown	Unassigned	False
	H08	SYBR		Unkn		0.357255		Unknown	Unassigned	False
	H09	SYBR		Unkn		-0.989339		Unknown	Unassigned	False
	H10	SYBR		Unkn		0.289435		Unknown	Unassigned	False
	H11	SYBR		Unkn		0.789943		Unknown	Unassigned	False
	H12	SYBR		Unkn		0.227052		Unknown	Unassigned	False

## Sheet: Run Information
File Name	admin_2022-03-21 14-55-21_BR008212.pcrd
Created By User	admin
Notes
ID
Run Started	03/21/2022 06:55:44 UTC
Run Ended	03/21/2022 08:41:29 UTC
Sample Vol	10
Lid Temp	105
Protocol File Name	1.prcl
Plate Setup File Name	2.pltd
Base Serial Number	BR008212
Optical Head Serial Number	788BR08065
CFX Manager Version	3.1.1517.0823.
