# Supplementary material for: Prognostic value of RNA methylation-related genes in gastric adenocarcinoma based on bioinformatics
Source: PeerJ. 2024 Feb 29;12:e16951. doi: 10.7717/peerj.16951 (PMC10909369; doi:10.7717/peerj.16951)
Supplement: Supplemental Information 23 [file peerj-12-16951-s023.xlsx]

## Sheet: 0
	Well	Fluor	Target	Content	Sample	Cq	SQ
	A01	SYBR		Unkn		28.0934
	A02	SYBR		Unkn		27.9217
	A03	SYBR		Unkn		28.1272
	A04	SYBR		Unkn		28.7934
	A05	SYBR		Unkn		29.3
	A06	SYBR		Unkn		29.0065
	A07	SYBR		Unkn		27.3386
	A08	SYBR		Unkn		27.1939
	A09	SYBR		Unkn		27.2618
	A10	SYBR		Unkn		24.9599
	A11	SYBR		Unkn		24.988
	A12	SYBR		Unkn		24.8539
	B01	SYBR		Unkn		29.8176
	B02	SYBR		Unkn		30.4563
	B03	SYBR		Unkn		30.3493
	B04	SYBR		Unkn		25.9898
	B05	SYBR		Unkn		26.3249
	B06	SYBR		Unkn		26.4446
	B07	SYBR		Unkn		29.5661
	B08	SYBR		Unkn		30.7964
	B09	SYBR		Unkn		30.4807
	B10	SYBR		Unkn		26.3038
	B11	SYBR		Unkn		27.292
	B12	SYBR		Unkn		27.9775
	C01	SYBR		Unkn		30.6518
	C02	SYBR		Unkn		31.0946
	C03	SYBR		Unkn		30.1989
	C04	SYBR		Unkn		24.0555
	C05	SYBR		Unkn		25.0975
	C06	SYBR		Unkn		25.0846
	C07	SYBR		Unkn		29.0085
	C08	SYBR		Unkn		28.9044
	C09	SYBR		Unkn		28.8948
	C10	SYBR		Unkn		28.9984
	C11	SYBR		Unkn		29.729
	C12	SYBR		Unkn		28.6015
	D01	SYBR		Unkn		31.4396
	D02	SYBR		Unkn		30.2479
	D03	SYBR		Unkn		30.1476
	D04	SYBR		Unkn		24.5515
	D05	SYBR		Unkn		25.0153
	D06	SYBR		Unkn		24.911
	D07	SYBR		Unkn		30.3745
	D08	SYBR		Unkn		30.4802
	D09	SYBR		Unkn		31.5079
	D10	SYBR		Unkn		28.9458
	D11	SYBR		Unkn		28.692
	D12	SYBR		Unkn		28.978
	E01	SYBR		Unkn		18.0958
	E02	SYBR		Unkn		17.9388
	E03	SYBR		Unkn		17.5892
	E04	SYBR		Unkn		18.5846
	E05	SYBR		Unkn		19.2716
	E06	SYBR		Unkn		18.1559
	E07	SYBR		Unkn		18.0346
	E08	SYBR		Unkn		18.02
	E09	SYBR		Unkn		17.8001
	E10	SYBR		Unkn		17.1077
	E11	SYBR		Unkn		18.1111
	E12	SYBR		Unkn		18.2644
	F01	SYBR		Unkn
	F02	SYBR		Unkn
	F03	SYBR		Unkn
	F04	SYBR		Unkn
	F05	SYBR		Unkn
	F06	SYBR		Unkn
	F07	SYBR		Unkn
	F08	SYBR		Unkn
	F09	SYBR		Unkn
	F10	SYBR		Unkn
	F11	SYBR		Unkn
	F12	SYBR		Unkn
	G01	SYBR		Unkn
	G02	SYBR		Unkn
	G03	SYBR		Unkn
	G04	SYBR		Unkn
	G05	SYBR		Unkn
	G06	SYBR		Unkn
	G07	SYBR		Unkn
	G08	SYBR		Unkn
	G09	SYBR		Unkn
	G10	SYBR		Unkn
	G11	SYBR		Unkn
	G12	SYBR		Unkn
	H01	SYBR		Unkn
	H02	SYBR		Unkn
	H03	SYBR		Unkn
	H04	SYBR		Unkn
	H05	SYBR		Unkn
	H06	SYBR		Unkn
	H07	SYBR		Unkn
	H08	SYBR		Unkn
	H09	SYBR		Unkn
	H10	SYBR		Unkn
	H11	SYBR		Unkn
	H12	SYBR		Unkn

## Sheet: Run Information
File Name	admin_2022-03-21 14-55-21_BR008212.pcrd
Created By User	admin
Notes
ID
Run Started	03/21/2022 06:55:44 UTC
Run Ended	03/21/2022 08:41:29 UTC
Sample Vol	10
Lid Temp	105
Protocol File Name	1.prcl
Plate Setup File Name	2.pltd
Base Serial Number	BR008212
Optical Head Serial Number	788BR08065
CFX Manager Version	3.1.1517.0823.
