# Supplementary material for: Prognostic value of RNA methylation-related genes in gastric adenocarcinoma based on bioinformatics
Source: PeerJ. 2024 Feb 29;12:e16951. doi: 10.7717/peerj.16951 (PMC10909369; doi:10.7717/peerj.16951)
Supplement: Supplemental Information 24 [file peerj-12-16951-s024.xlsx]

## Sheet: SYBR
		1	2	3	4	5	6	7	8	9	10	11	12
A	Content	Unkn	Unkn	Unkn	Unkn	Unkn	Unkn	Unkn	Unkn	Unkn	Unkn	Unkn	Unkn
A	Sample
A	Cq	28.0934	27.9217	28.1272	28.7934	29.3	29.0065	27.3386	27.1939	27.2618	24.9599	24.988	24.8539
A	copy number
B	Content	Unkn	Unkn	Unkn	Unkn	Unkn	Unkn	Unkn	Unkn	Unkn	Unkn	Unkn	Unkn
B	Sample
B	Cq	29.8176	30.4563	30.3493	25.9898	26.3249	26.4446	29.5661	30.7964	30.4807	26.3038	27.292	27.9775
B	copy number
C	Content	Unkn	Unkn	Unkn	Unkn	Unkn	Unkn	Unkn	Unkn	Unkn	Unkn	Unkn	Unkn
C	Sample
C	Cq	30.6518	31.0946	30.1989	24.0555	25.0975	25.0846	29.0085	28.9044	28.8948	28.9984	29.729	28.6015
C	copy number
D	Content	Unkn	Unkn	Unkn	Unkn	Unkn	Unkn	Unkn	Unkn	Unkn	Unkn	Unkn	Unkn
D	Sample
D	Cq	31.4396	30.2479	30.1476	24.5515	25.0153	24.911	30.3745	30.4802	31.5079	28.9458	28.692	28.978
D	copy number
E	Content	Unkn	Unkn	Unkn	Unkn	Unkn	Unkn	Unkn	Unkn	Unkn	Unkn	Unkn	Unkn
E	Sample
E	Cq	18.0958	17.9388	17.5892	18.5846	19.2716	18.1559	18.0346	18.02	17.8001	17.1077	18.1111	18.2644
E	copy number
F	Content	Unkn	Unkn	Unkn	Unkn	Unkn	Unkn	Unkn	Unkn	Unkn	Unkn	Unkn	Unkn
F	Sample
F	Cq
F	copy number
G	Content	Unkn	Unkn	Unkn	Unkn	Unkn	Unkn	Unkn	Unkn	Unkn	Unkn	Unkn	Unkn
G	Sample
G	Cq
G	copy number
H	Content	Unkn	Unkn	Unkn	Unkn	Unkn	Unkn	Unkn	Unkn	Unkn	Unkn	Unkn	Unkn
H	Sample
H	Cq
H	copy number

## Sheet: Run Information
File Name	admin_2022-03-21 14-55-21_BR008212.pcrd
Created By User	admin
Notes
ID
Run Started	03/21/2022 06:55:44 UTC
Run Ended	03/21/2022 08:41:29 UTC
Sample Vol	10
Lid Temp	105
Protocol File Name	1.prcl
Plate Setup File Name	2.pltd
Base Serial Number	BR008212
Optical Head Serial Number	788BR08065
CFX Manager Version	3.1.1517.0823.
