# Supplementary material for: Prognostic value of RNA methylation-related genes in gastric adenocarcinoma based on bioinformatics
Source: PeerJ. 2024 Feb 29;12:e16951. doi: 10.7717/peerj.16951 (PMC10909369; doi:10.7717/peerj.16951)
Supplement: Supplemental Information 25 [file peerj-12-16951-s025.xlsx]

## Sheet: 0
	Well	Fluor	Target	Content	Sample	Biological Set Name	Cq	Cq Mean	Cq Std. Dev	Starting Quantity (SQ)	Log Starting Quantity	SQ Mean	SQ Std. Dev	Set Point	Well Note
	A01	SYBR		Unkn			28.0934	28.0934	0				0	72
	A02	SYBR		Unkn			27.9217	27.9217	0				0	72
	A03	SYBR		Unkn			28.1272	28.1272	0				0	72
	A04	SYBR		Unkn			28.7934	28.7934	0				0	72
	A05	SYBR		Unkn			29.3	29.3	0				0	72
	A06	SYBR		Unkn			29.0065	29.0065	0				0	72
	A07	SYBR		Unkn			27.3386	27.3386	0				0	72
	A08	SYBR		Unkn			27.1939	27.1939	0				0	72
	A09	SYBR		Unkn			27.2618	27.2618	0				0	72
	A10	SYBR		Unkn			24.9599	24.9599	0				0	72
	A11	SYBR		Unkn			24.988	24.988	0				0	72
	A12	SYBR		Unkn			24.8539	24.8539	0				0	72
	B01	SYBR		Unkn			29.8176	29.8176	0			0	0	72
	B02	SYBR		Unkn			30.4563	30.4563	0			0	0	72
	B03	SYBR		Unkn			30.3493	30.3493	0			0	0	72
	B04	SYBR		Unkn			25.9898	25.9898	0			0	0	72
	B05	SYBR		Unkn			26.3249	26.3249	0				0	72
	B06	SYBR		Unkn			26.4446	26.4446	0				0	72
	B07	SYBR		Unkn			29.5661	29.5661	0				0	72
	B08	SYBR		Unkn			30.7964	30.7964	0			0	0	72
	B09	SYBR		Unkn			30.4807	30.4807	0				0	72
	B10	SYBR		Unkn			26.3038	26.3038	0			0	0	72
	B11	SYBR		Unkn			27.292	27.292	0			0	0	72
	B12	SYBR		Unkn			27.9775	27.9775	0			0	0	72
	C01	SYBR		Unkn			30.6518	30.6518	0				0	72
	C02	SYBR		Unkn			31.0946	31.0946	0				0	72
	C03	SYBR		Unkn			30.1989	30.1989	0				0	72
	C04	SYBR		Unkn			24.0555	24.0555	0				0	72
	C05	SYBR		Unkn			25.0975	25.0975	0				0	72
	C06	SYBR		Unkn			25.0846	25.0846	0				0	72
	C07	SYBR		Unkn			29.0085	29.0085	0				0	72
	C08	SYBR		Unkn			28.9044	28.9044	0				0	72
	C09	SYBR		Unkn			28.8948	28.8948	0				0	72
	C10	SYBR		Unkn			28.9984	28.9984	0				0	72
	C11	SYBR		Unkn			29.729	29.729	0				0	72
	C12	SYBR		Unkn			28.6015	28.6015	0				0	72
	D01	SYBR		Unkn			31.4396	31.4396	0				0	72
	D02	SYBR		Unkn			30.2479	30.2479	0				0	72
	D03	SYBR		Unkn			30.1476	30.1476	0				0	72
	D04	SYBR		Unkn			24.5515	24.5515	0				0	72
	D05	SYBR		Unkn			25.0153	25.0153	0				0	72
	D06	SYBR		Unkn			24.911	24.911	0				0	72
	D07	SYBR		Unkn			30.3745	30.3745	0				0	72
	D08	SYBR		Unkn			30.4802	30.4802	0				0	72
	D09	SYBR		Unkn			31.5079	31.5079	0				0	72
	D10	SYBR		Unkn			28.9458	28.9458	0				0	72
	D11	SYBR		Unkn			28.692	28.692	0				0	72
	D12	SYBR		Unkn			28.978	28.978	0				0	72
	E01	SYBR		Unkn			18.0958	18.0958	0				0	72
	E02	SYBR		Unkn			17.9388	17.9388	0				0	72
	E03	SYBR		Unkn			17.5892	17.5892	0				0	72
	E04	SYBR		Unkn			18.5846	18.5846	0				0	72
	E05	SYBR		Unkn			19.2716	19.2716	0				0	72
	E06	SYBR		Unkn			18.1559	18.1559	0				0	72
	E07	SYBR		Unkn			18.0346	18.0346	0				0	72
	E08	SYBR		Unkn			18.02	18.02	0				0	72
	E09	SYBR		Unkn			17.8001	17.8001	0				0	72
	E10	SYBR		Unkn			17.1077	17.1077	0				0	72
	E11	SYBR		Unkn			18.1111	18.1111	0				0	72
	E12	SYBR		Unkn			18.2644	18.2644	0				0	72
	F01	SYBR		Unkn				0	0			0	0	72
	F02	SYBR		Unkn				0	0			0	0	72
	F03	SYBR		Unkn				0	0			0	0	72
	F04	SYBR		Unkn				0	0			0	0	72
	F05	SYBR		Unkn				0	0			0	0	72
	F06	SYBR		Unkn				0	0			0	0	72
	F07	SYBR		Unkn				0	0			0	0	72
	F08	SYBR		Unkn				0	0			0	0	72
	F09	SYBR		Unkn				0	0			0	0	72
	F10	SYBR		Unkn				0	0			0	0	72
	F11	SYBR		Unkn				0	0			0	0	72
	F12	SYBR		Unkn				0	0			0	0	72
	G01	SYBR		Unkn				0	0			0	0	72
	G02	SYBR		Unkn				0	0			0	0	72
	G03	SYBR		Unkn				0	0			0	0	72
	G04	SYBR		Unkn				0	0			0	0	72
	G05	SYBR		Unkn				0	0			0	0	72
	G06	SYBR		Unkn				0	0			0	0	72
	G07	SYBR		Unkn				0	0			0	0	72
	G08	SYBR		Unkn				0	0			0	0	72
	G09	SYBR		Unkn				0	0			0	0	72
	G10	SYBR		Unkn				0	0			0	0	72
	G11	SYBR		Unkn				0	0			0	0	72
	G12	SYBR		Unkn				0	0			0	0	72
	H01	SYBR		Unkn				0	0			0	0	72
	H02	SYBR		Unkn				0	0			0	0	72
	H03	SYBR		Unkn				0	0			0	0	72
	H04	SYBR		Unkn				0	0			0	0	72
	H05	SYBR		Unkn				0	0			0	0	72
	H06	SYBR		Unkn				0	0			0	0	72
	H07	SYBR		Unkn				0	0			0	0	72
	H08	SYBR		Unkn				0	0			0	0	72
	H09	SYBR		Unkn				0	0			0	0	72
	H10	SYBR		Unkn				0	0			0	0	72
	H11	SYBR		Unkn				0	0			0	0	72
	H12	SYBR		Unkn				0	0			0	0	72

## Sheet: Run Information
File Name	admin_2022-03-21 14-55-21_BR008212.pcrd
Created By User	admin
Notes
ID
Run Started	03/21/2022 06:55:44 UTC
Run Ended	03/21/2022 08:41:29 UTC
Sample Vol	10
Lid Temp	105
Protocol File Name	1.prcl
Plate Setup File Name	2.pltd
Base Serial Number	BR008212
Optical Head Serial Number	788BR08065
CFX Manager Version	3.1.1517.0823.
