# Supplementary material for: Prognostic value of RNA methylation-related genes in gastric adenocarcinoma based on bioinformatics
Source: PeerJ. 2024 Feb 29;12:e16951. doi: 10.7717/peerj.16951 (PMC10909369; doi:10.7717/peerj.16951)
Supplement: Supplemental Information 26 [file peerj-12-16951-s026.xlsx]

## Sheet: SYBR
	Cycle	A1	A2	A3	A4	A5	A6	A7	A8	A9	A10	A11	A12	B1	B2	B3	B4	B5	B6	B7	B8	B9	B10	B11	B12	C1	C2	C3	C4	C5	C6	C7	C8	C9	C10	C11	C12	D1	D2	D3	D4	D5	D6	D7	D8	D9	D10	D11	D12
	1	-19.9432	-18.2734	2.01554	-3.71486	-16.2584	-19.8041	-19.7685	-6.13717	-16.7819	-21.2799	-16.7735	-22.3382	-1.97864	-9.09821	-9.51916	3.30124	-0.396213	-0.159189	0.110147	-2.90889	-5.14812	-7.92702	-6.66108	-5.84352	-12.7998	-22.3836	-4.90091	-8.89342	-14.0986	-53.688	-2.3054	-2.83727	-47.1187	-1.8428	-9.74901	-7.54743	-25.5329	-25.4332	-2.11339	-14.7099	-15.265	-7.87163	-1.35464	-0.290462	-24.7449	-3.6868	-21.1251	-19.9854
	2	-3.35049	-2.2338	1.13961	4.98002	-3.23645	-5.26102	-0.971195	1.14029	-6.33329	-8.13008	-5.83545	-13.1397	2.53774	-2.81637	-0.368768	-1.51864	1.13046	-0.51232	-2.22822	2.57836	-4.93066	-2.97338	-3.06851	0.798449	-2.56125	-8.51755	-5.78895	-0.469034	-0.888979	-14.8101	1.01707	-0.743457	-6.00605	-0.83165	-0.470324	-1.37243	-10.5014	-4.26784	0.410092	-0.38885	1.30198	-4.15087	0.866345	0.469928	-4.82865	-2.24151	0.660443	-6.18674
	3	-0.433624	2.17241	3.96777	5.38181	3.3135	0.235359	-3.91376	0.539921	-3.693	1.01862	-0.613229	-6.55426	-0.908386	-1.63971	3.83747	-0.367035	-0.403295	0.548797	0.680595	3.37849	-0.102571	-1.87386	1.52307	3.78233	2.14396	1.3221	-0.339569	3.13066	1.78462	-11.5011	0.512842	-0.335621	4.70481	-0.206989	-1.72303	2.0923	-0.13697	-1.04588	-1.46554	-1.46932	1.03613	1.14282	2.37244	-0.144024	3.36645	-3.1438	-1.87966	1.32413
	4	2.639	3.88769	-0.243281	-1.51901	-0.0789038	4.52876	2.16155	2.24008	2.43339	-0.466459	-0.324672	-0.61656	1.42911	-2.81943	2.70041	-1.01264	-0.956268	4.30725	0.95357	-2.06907	-2.11424	-1.28196	0.698079	7.59941	1.06916	-0.571761	2.20177	2.68298	4.19519	-3.3707	0.373971	6.27293	3.24975	3.66417	3.7523	1.41925	1.39649	-1.32006	-2.90618	0.848345	-0.677348	-1.56013	2.58605	2.99722	-1.3043	4.37967	3.72852	-0.760125
	5	-0.727758	-3.01003	0.502698	-3.17077	-0.72778	0.969446	-4.28066	0.153557	2.00463	4.00502	3.33454	3.88668	-1.36299	1.68393	0.328983	1.77028	-0.443382	-0.751738	2.47831	1.7166	0.69211	0.765972	2.00936	1.01664	3.92519	-0.992654	0.770831	4.4232	1.34792	-1.92645	-0.935752	1.01765	5.13621	1.89978	-1.96629	3.27299	2.14744	1.4194	3.75454	0.544943	1.66646	-1.78012	1.56029	3.7763	0.0650229	0.644272	-1.57527	5.24665
	6	2.2271	3.81273	-0.62345	2.35967	1.04417	0.949714	6.42049	1.66043	2.44393	-0.73251	3.40471	3.61347	-0.50904	-1.73583	-0.0690874	-1.30348	0.960586	-0.457932	-2.35257	-0.449906	-0.154654	0.952926	-2.65976	0.0707178	1.73641	0.229822	-0.113897	-1.38867	-0.364943	-7.24508	-2.52131	-1.89794	3.94208	-4.62588	-0.434954	2.47218	0.00157003	1.41533	1.69716	-1.36341	0.697189	1.98466	0.202775	1.21437	6.03064	-0.89766	4.0787	0.779065
	7	1.97923	0.515804	2.65101	2.95085	-3.56921	2.48073	2.61461	0.340453	2.73512	2.02416	2.24299	3.58613	0.731841	2.75602	2.46259	5.19562	-0.143781	-3.56628	1.41463	-0.270325	-0.100827	3.15173	0.672886	-0.610732	1.66564	1.32102	-1.40037	0.502048	2.33351	-6.54732	4.07535	-0.619522	-1.66489	-3.01826	1.94833	-1.28525	-1.17698	2.03854	1.83913	3.14871	-0.139053	-1.00283	1.11143	-2.76165	2.36731	2.30292	3.11461	3.53479
	8	3.21369	1.50188	1.47736	0.918689	1.54097	-0.646817	1.3638	-2.50653	-0.294981	2.43419	-4.13474	2.02464	0.0691514	-1.98023	-0.432551	2.22123	-1.1431	2.9324	2.27902	-0.0568615	2.28506	0.869213	-1.49397	4.20589	-0.189872	3.07362	-1.68443	0.207982	1.84892	-6.17904	3.27908	0.540311	-0.711865	0.931493	-1.93917	-1.19258	4.01857	1.15776	0.646173	0.747726	3.40083	3.55195	-1.39383	0.876952	-3.44141	-4.30601	2.29673	-3.71262
	9	5.83344	0.979998	-1.30072	-0.215149	1.88151	-2.11791	0.301092	0.940634	-0.0499707	-1.53559	0.0340798	0.201662	4.25099	-1.48224	-2.77533	-0.0444329	-0.951129	0.0871679	4.63091	-0.267424	0.19818	-0.760375	0.0454346	6.30439	-0.254108	2.69824	-0.153052	-2.10518	-2.97077	26.0107	2.31504	0.00819379	0.092937	1.80825	2.79973	-3.52286	-1.68626	3.23812	2.9179	1.31482	-1.26981	-0.974453	-1.07774	-0.559575	-0.36708	3.26951	-1.63022	-1.94848
	10	-3.84934	-2.21259	-3.01609	2.03307	0.268613	-3.86782	-0.266692	0.75903	-0.901211	-0.7302	-0.823845	-0.725699	0.680539	-0.884396	7.25758	-1.72072	4.96448	1.35721	2.18212	-0.546624	3.88229	-2.12712	-0.141038	1.1051	1.86796	-0.407369	2.49414	-0.764379	1.24138	14.7285	-0.639153	-0.0541153	-1.87246	2.95782	4.4695	-2.69229	1.90833	-0.67186	1.31199	1.19657	0.183263	3.72221	-1.39739	-3.21618	-1.18387	2.15219	-1.61293	-0.428793
	11	-0.918843	0.109729	0.677045	-1.58868	0.398348	-2.75348	-0.203022	0.792936	-0.847057	4.30096	0.958731	2.05278	-1.83823	-0.0837541	-0.24759	-3.42525	-0.345549	1.3758	0.278815	0.780202	0.240659	-3.01633	-3.33585	-0.900517	-3.1754	1.20874	-0.163579	-0.76468	-3.2465	6.08063	-1.9117	0.445598	-3.5402	1.07876	2.57354	-0.2314	-0.157125	1.4147	-1.81121	0.967719	-0.446174	-1.67849	0.609008	-2.50634	-4.80125	-1.92577	-1.78262	-1.65363
	12	-6.24977	1.70607	-0.345913	-1.04536	-0.834161	1.40619	3.89118	0.149218	1.16871	1.57698	-2.81367	-3.50115	-2.28551	-2.10538	1.55808	-2.32973	2.96142	-2.92075	0.770711	3.28904	-3.10795	2.56676	1.74252	0.868595	-2.79026	-1.9961	0.787341	-1.44924	-3.05672	3.47937	3.80764	-4.23916	-0.381861	1.16731	0.893223	4.41947	-1.02719	-0.373439	-1.75296	-0.179895	1.76205	2.83128	-2.81969	-3.02423	-0.830519	-0.406252	1.77212	0.661832
	13	-0.304895	-4.39206	-3.00056	-2.33132	0.374823	-1.5457	-3.8342	-1.57679	1.38022	-1.46495	-1.03342	-3.83744	2.23288	-1.30955	3.14273	-0.513432	4.14228	-1.77095	-1.41122	-3.58391	0.701755	1.67047	4.11551	-2.62575	1.16149	2.28983	-0.414089	-1.8093	-1.30374	8.99902	-3.23322	-0.989124	-3.9211	-5.64522	2.97958	2.39124	-0.809856	-0.916035	-0.181071	-1.24316	-0.850485	-0.843102	-2.50289	1.13507	-2.56729	-0.464008	-0.489797	1.69221
	14	-2.90902	-3.33774	4.62482	-3.95572	-3.296	0.41066	-0.765198	-1.50768	-1.89258	1.90959	-1.41113	0.555382	0.316021	2.88369	2.10063	-1.91072	0.422807	-1.90872	1.53485	-1.79752	0.287737	0.944358	4.56185	-4.63399	-0.373911	-1.33101	1.76131	0.373926	-0.684014	2.47859	1.73715	-2.27909	-4.29783	-1.2822	-2.60027	-2.94661	-2.77797	0.644556	2.03645	0.976016	-1.50511	3.83276	1.84145	1.38953	0.587189	0.965899	0.395349	-1.55548
	15	-1.64771	-0.74454	-1.35103	1.35883	-2.82726	6.25555	0.705405	-3.36229	-2.59396	-0.694237	-2.68947	6.00362	0.422392	-0.837358	-0.744724	0.99068	4.07205	1.48579	0.884929	0.381499	1.17835	0.582026	-0.608485	-0.582978	-2.85567	1.75275	1.45625	1.01536	2.07598	2.14534	0.277015	3.57532	-7.80117	3.22706	-3.33602	-4.01836	-0.753309	-4.43662	-2.46439	-0.916881	-1.85458	0.195932	1.567	4.00181	3.06206	3.0905	-2.92078	1.54881
	16	-1.77733	-4.52775	-6.13879	-3.42371	-0.50201	1.88817	-1.5543	-0.789644	-6.95263	-6.4693	0.501389	-3.1314	1.67129	0.211775	-4.00446	1.87661	-0.513313	2.70592	1.57262	-3.90667	6.74822	2.81424	-2.27082	5.26392	-0.725319	-3.06424	3.26821	-3.18343	0.849371	2.45729	-5.45818	0.2602	-8.37952	0.503213	2.97253	-1.17921	-0.596332	-2.45274	-1.05	0.824585	-0.268863	-1.16533	5.57132	1.78714	5.54657	2.25733	-1.32667	1.5143
	17	-0.0715687	-3.38808	-2.76729	-0.760208	-1.75955	-4.47734	-3.16417	-3.36394	2.04668	0.688084	-0.636749	0.927094	-1.2104	5.09963	0.223999	-0.761348	-1.66373	1.63378	-1.81898	2.57518	1.29876	-0.343873	1.41529	-0.701088	-1.35192	-4.0465	-0.473681	0.875546	-2.79808	0.643501	-1.1444	-2.81987	20.2112	3.2159	-2.63769	-1.51387	-3.18102	-2.83679	-4.41428	-2.3613	-2.13664	-1.22709	11.8693	14.0577	10.9255	0.481078	-3.57844	-2.50543
	18	-1.05751	-1.83212	-0.921139	-0.924052	1.2058	-1.58415	-3.24899	-3.11494	-0.48082	-5.83357	3.54338	-6.55384	1.18594	3.31638	2.61548	2.31863	1.24993	-2.42409	-1.21602	1.80077	0.0694157	-2.49631	-1.10938	-3.00285	-2.90576	-4.09484	2.01483	-2.72201	0.358237	-0.566598	1.92783	-1.89427	12.8448	-1.84776	-2.95729	4.45338	2.46501	-1.05663	-3.27854	-0.0356486	4.17873	-1.06232	28.95	31.8707	29.2078	-4.05464	2.43392	-4.49119
	19	-3.38159	-5.97635	-1.75827	0.23358	-2.34303	-4.78296	1.10448	1.50438	0.487737	-3.10239	0.120959	3.52992	-2.22016	-0.253605	2.78319	1.87192	-1.25958	-4.90526	-1.30325	-1.94279	-4.27734	-2.82105	-1.79011	-3.46648	-3.26228	-1.51335	-1.89561	-1.94725	-0.987381	-2.11247	1.58191	0.70751	-2.06611	-2.37817	1.63308	1.14131	2.17455	-0.549786	2.60998	2.8751	2.63849	1.63504	60.6705	57.5665	56.5619	-2.71957	-1.22135	-2.82324
	20	-1.79599	-0.85157	-3.86536	-4.53075	-0.570169	-0.649506	0.351407	-0.931369	-2.07113	-0.806598	2.20587	0.596053	-0.786642	2.19364	1.61718	-0.693307	-3.08274	2.1516	-2.04653	3.05996	2.55545	-4.49297	-0.116211	-1.23657	-2.18407	-2.2168	-3.41176	-1.59554	-2.99324	-7.55308	2.94088	2.64847	-3.52008	3.4248	-1.94491	-0.885378	0.360656	4.18175	0.739647	9.45837	6.55827	5.92264	120.231	116.407	111.789	1.66051	0.643766	-0.709629
	21	-1.80062	2.14605	-0.0628529	-2.32524	1.65277	-0.26991	-3.1676	0.00725174	-3.5745	-3.15613	-1.45201	0.356515	2.55423	2.38188	-2.40518	0.7195	3.55243	0.080769	-3.8586	-0.456046	-2.58544	0.69299	-1.23123	-3.14603	-2.27888	3.10032	-3.41105	-2.30327	1.32986	-5.18139	8.10398	3.93661	3.93449	2.68537	1.05097	0.457713	3.08776	4.08105	5.18102	15.4168	15.2581	12.3368	227.636	208.128	207.61	0.840433	-0.468496	-5.28291
	22	-1.69675	3.56052	-2.27653	-0.876947	-1.03528	-1.22486	0.847494	-2.59856	-0.962516	-2.00251	-2.31658	-2.77129	-2.5422	-1.9652	-0.936493	-0.574707	-4.67126	0.0307786	0.0500169	-0.728024	2.37654	-0.313948	-0.937226	2.30428	-3.82385	2.337	-0.00786239	0.689431	2.68489	-5.50082	12.4961	13.8621	6.60091	0.01884	-1.07214	-3.46061	4.97809	12.9642	8.44107	34.5547	27.4287	31.2812	392.446	360.536	355.672	0.210478	-0.627635	3.03014
	23	3.32201	-0.00911867	2.09415	3.23466	5.41063	-0.736688	-2.43602	-1.72492	1.42938	-7.94128	-4.31099	-3.74205	1.20308	-0.653156	0.102638	0.468996	-1.99667	0.575777	-4.42008	0.43629	-0.338526	2.504	-2.85803	0.124059	-2.59418	-1.1371	1.25869	4.10518	6.48279	-2.81833	25.2832	26.5361	20.3927	2.93427	0.13334	-1.49744	20.1715	21.8748	25.7613	62.7843	50.4229	55.0579	621.105	569.438	554.287	0.923647	-0.672876	2.43609
	24	9.76646	9.33427	10.5889	8.96639	13.0213	9.83449	7.59806	10.21	7.83066	-3.90364	-0.348171	-0.260534	0.665507	1.89981	-1.53841	1.17074	0.902292	-0.14337	-5.79093	3.53206	0.671874	-1.55387	3.44642	-4.25128	14.152	1.77807	1.27096	7.78476	5.12008	5.36014	46.5609	47.3202	39.443	-0.70385	-4.12095	2.79331	36.6437	41.4773	45.4753	113.881	95.1088	98.3163	845.89	774.127	747.111	0.0156708	4.04885	2.30159
	25	22.8651	22.2869	21.3483	25.9673	22.0222	22.9562	12.433	18.1099	18.9286	1.38609	2.33973	-0.583928	-0.246917	4.27324	-2.47445	-0.692205	-2.16259	3.2218	-3.16413	1.53085	-4.2147	1.62334	0.00138771	-6.28367	5.82191	4.45651	2.6819	12.1809	12.835	7.8538	88.9844	89.2273	86.0726	0.874576	-2.9748	1.46782	66.1745	73.5335	78.6194	198.325	158.867	166.528	1047.23	955.519	916.329	0.980675	3.31213	5.14162
	26	40.7416	43.0011	40.7831	51.4709	39.5374	42.6208	32.87	38.2624	35.3125	0.481084	4.34363	-0.355083	1.00929	2.31478	-3.87251	0.0957645	-1.87507	-5.28242	-1.03572	-0.532705	0.821094	2.45169	-1.14012	1.3185	6.62957	5.71024	10.0313	26.5363	26.6886	24.0958	159.412	167.986	169.205	-2.72374	-1.35752	-1.05293	122.59	136.313	145.184	316.825	262.407	279.627	1194.11	1086.95	1039.78	8.45323	12.4543	12.2128
	27	83.299	90.0249	82.8202	97.5111	77.7281	89.8499	63.9544	75.9936	69.2861	6.71957	12.5127	6.67593	0.111523	2.08564	-1.2592	-3.06604	-1.47899	-1.13757	0.884677	0.583742	-2.01472	3.40438	-0.269067	0.221872	18.4943	11.1247	18.4972	51.0088	47.7064	42.8757	281.505	298.785	295.626	-1.49668	-0.347662	4.50932	208.73	233.686	248.663	470.437	387.447	428.852	1288.05	1170.03	1118	20.0996	24.6523	30.5532
	28	150.554	166.437	146.855	176.846	132.658	159.776	125.524	139.785	133.841	11.7241	23.6648	13.7184	2.72978	0.992772	-0.929675	-2.3838	0.951225	2.33708	-1.84454	2.36521	-2.16643	2.00618	0.374066	-1.0294	30.888	22.1278	40.5877	89.9167	85.3667	87.4896	455.563	505.527	500.076	-6.35036	9.58443	-3.18745	336.859	372.643	396.645	615.861	516.962	578.821	1340.76	1218.85	1163.77	46.4861	52.7391	47.0854
	29	256.523	274.968	253.772	282.434	225.308	264.315	228.678	246.385	235.5	19.6896	41.7639	22.829	-4.82018	-1.36584	-3.46234	4.7012	-7.64939	0.765509	-1.19337	-6.37693	-0.99412	-1.87825	1.00063	-3.48424	56.5332	43.4862	75.7985	155.06	150.872	151.115	662.969	717.666	715.813	3.61357	2.74871	-0.998915	477.117	538.589	567.292	744.456	632.954	721.153	1378.33	1254.03	1194.66	87.6426	103.461	88.4601
	30	401.302	432.008	397.951	423.534	346.031	406.419	382.79	406.861	395.099	44.1558	82.3092	41.482	-2.74255	0.955234	-1.50086	-1.0527	-0.796473	0.957276	-0.789168	-2.12843	-0.664184	-0.575971	1.05329	-5.05621	107.445	84.8895	140.001	252.194	249.164	261.499	849.192	913.421	917.179	3.91013	5.59122	4.12714	605.458	690.062	723.069	846.85	724.31	840.717	1407.03	1279.81	1217.78	164.631	185.817	162.075
	31	559.997	586.115	564.274	556.117	480.924	552.507	582.889	606.687	591.772	89.0066	151.786	85.6345	1.23495	0.587455	-5.82813	0.246553	1.6629	-1.91124	2.57582	0.15516	-1.69324	1.56537	-1.78731	-4.70153	188.774	150.847	242.812	385.298	382.918	391.045	993.721	1068.93	1078.9	9.08852	14.004	3.43129	710.644	814.589	851.585	924.707	796.58	933.038	1432.11	1300.69	1238.3	293.333	320.47	286.004
	32	698.229	724.291	711.963	671.845	605.071	682.626	771.015	787.746	771.594	163.439	250.284	154.52	-1.14774	-0.543598	-4.2346	-0.76647	1.11214	1.70254	2.31818	3.37987	1.83835	0.903347	1.16456	-3.12952	313.849	252.415	402.623	535.798	534.362	544.232	1091.7	1172.12	1183.05	25.184	25.7341	14.4301	782.468	903.786	943.504	983.17	846.191	998.853	1449.12	1315.33	1255.66	477.548	508.91	471.166
	33	804.333	831.374	828.53	763.406	706.425	787.929	922.795	927.136	912.83	287.451	395.801	264.601	1.19287	-0.896142	-2.68324	0.285958	-0.202388	1.8678	-1.63781	1.81865	-1.55369	2.00129	2.14261	-5.97863	481.783	393.661	598.773	671.776	669.705	680.684	1149.16	1235.03	1246.68	44.266	52.2898	35.3435	830.657	962.353	1001.47	1023.48	882.954	1046.8	1461.27	1327.41	1267.01	669.371	694.506	658.221
	34	876.358	901.678	909.126	831.229	782.835	869.049	1027.29	1021.21	1009.6	454.617	532.672	386.14	0.480132	-2.51075	-6.01189	0.662826	1.49366	3.72143	-0.591383	-0.0694844	-1.18678	0.0353306	-2.29845	-2.96001	643.118	562.348	784.559	786.845	782.565	795.817	1185.24	1273.9	1284.79	89.8643	103.204	57.2842	862.978	999.036	1037.29	1055.08	907.988	1081.01	1470.62	1336.85	1276.27	850.311	860.81	834.39
	35	922.802	947.512	961.818	882.07	838.694	928.725	1090.02	1075.83	1066.55	622.866	652.692	512.922	2.98826	-2.55747	-3.69673	0.750771	8.62918	9.73861	4.17742	-2.5294	3.50036	-2.20227	-2.03913	1.01915	786.049	712.678	943.456	876.137	872.712	884.956	1209.14	1299.67	1309.19	160.571	181.738	107.905	884.033	1022.48	1062.33	1077.52	928.498	1108.85	1478.22	1343.39	1280.84	991.119	982.24	971.721
	36	951.988	975.745	994.641	921.022	882.31	974.477	1131.61	1111.83	1104.32	774.787	741.038	617.66	0.161381	-2.43787	-3.48521	-0.416189	10.9486	15.1741	9.79808	2.02775	5.78827	0.163496	4.41332	0.951352	895.277	834.13	1061.98	944.566	945.115	953.393	1230.14	1322.93	1329.61	275.216	308.51	195.276	899.05	1040.88	1082.14	1098.71	946.703	1130.48	1486.24	1347.79	1288.9	1084.17	1061.85	1066.31
	37	972.869	997.984	1017.23	952.234	915.793	1008.95	1161.33	1137.46	1130.12	889.156	798.968	692.046	-1.35253	-0.621617	-5.7446	2.02848	23.4515	34.6465	13.9977	5.00181	12.4401	-2.96331	3.23747	2.80532	969.173	918.662	1141.42	997.266	999.947	1001.38	1248.41	1340.23	1345.41	435.912	488.817	322.688	911.621	1056.28	1095.92	1115.46	962.885	1149.31	1493.17	1354.31	1296.3	1142.19	1112.54	1124.22
	38	988.161	1012.11	1033.38	976.531	940.962	1038.91	1185.62	1157.55	1150.13	963.721	833.885	739.923	8.63693	-0.503767	-3.08336	5.01403	44.2406	61.8082	36.9628	8.9709	31.8529	1.89572	8.30003	-6.24344	1015.67	976.206	1192.58	1035.76	1042.66	1038.26	1263.84	1354.98	1358.91	586.612	662.879	499.51	922.016	1068.55	1106.32	1131.09	978.884	1166.81	1501.23	1361.33	1302.54	1178.3	1145.17	1161.46
	39	1002.54	1023.99	1045.38	995.345	961.416	1061.99	1203.76	1172.59	1167.34	1010.81	858.632	769.65	11.487	-0.0463339	2.2503	11.1849	82.3381	118.514	63.957	29.6854	62.22	-1.59831	21.0542	4.29667	1046.02	1010.64	1225.15	1067.47	1075.88	1066.72	1276.13	1364.5	1370.54	712.044	812.405	667.296	960.168	1076.63	1114.76	1144.16	992.148	1181.82	1504.94	1368.47	1308.93	1205.2	1170	1185.63
	40	1011.87	1033.98	1056.52	1012.95	978.505	1080.78	1220.03	1185.27	1180.94	1042.17	877.267	789.335	25.4064	-0.178727	12.1031	21.1507	132.98	212.84	115.956	47.6556	116.54	-0.228471	37.6942	11.0813	1069.8	1034.79	1246.54	1093.84	1103.32	1091.02	1286.76	1375.38	1381.92	804.398	921.232	813.202	985.31	1082.88	1124.01	1154.79	1002.83	1196.02	1510.11	1372.68	1314.08	1225.71	1187.2	1206.22
	41	1018.95	1044.88	1067.31	1030.11	995.349	1094.99	1233.85	1197.49	1193.46	1066.95	893.755	806.407	51.2892	1.12552	26.5302	34.7957	217.54	350.837	194.566	90.6139	207.892	0.105583	68.4728	17.4499	1090.89	1052.41	1262.47	1120.1	1126.48	1111.73	1297.1	1385.96	1394.45	874.887	999.245	933.823	999.02	1089.82	1131.93	1163.61	1010.72	1208.19	1515.04	1376.61	1321.63	1243.21	1202.5	1225.01
[truncated: 48 more columns]

## Sheet: Run Information
File Name	admin_2022-03-21 14-55-21_BR008212.pcrd
Created By User	admin
Notes
ID
Run Started	03/21/2022 06:55:44 UTC
Run Ended	03/21/2022 08:41:29 UTC
Sample Vol	10
Lid Temp	105
Protocol File Name	1.prcl
Plate Setup File Name	2.pltd
Base Serial Number	BR008212
Optical Head Serial Number	788BR08065
CFX Manager Version	3.1.1517.0823.
