# Supplementary material for: Prognostic value of RNA methylation-related genes in gastric adenocarcinoma based on bioinformatics
Source: PeerJ. 2024 Feb 29;12:e16951. doi: 10.7717/peerj.16951 (PMC10909369; doi:10.7717/peerj.16951)
Supplement: Supplemental Information 27 [file peerj-12-16951-s027.xlsx]

## Sheet: 0
	Well	Fluor	Target	Content	Sample	Melt Temp
	A01	SYBR		Unkn		82
	A02	SYBR		Unkn		82
	A03	SYBR		Unkn		82
	A04	SYBR		Unkn		85
	A05	SYBR		Unkn		85
	A06	SYBR		Unkn		85
	A07	SYBR		Unkn		78
	A08	SYBR		Unkn		78
	A09	SYBR		Unkn		78
	A10	SYBR		Unkn		81.5
	A11	SYBR		Unkn		81.5
	A12	SYBR		Unkn		81.5
	B01	SYBR		Unkn		None
	B02	SYBR		Unkn		None
	B03	SYBR		Unkn		None
	B04	SYBR		Unkn		None
	B05	SYBR		Unkn		71.5
	B06	SYBR		Unkn		None
	B07	SYBR		Unkn		None
	B08	SYBR		Unkn		None
	B09	SYBR		Unkn		None
	B10	SYBR		Unkn		None
	B11	SYBR		Unkn		None
	B12	SYBR		Unkn		None
	C01	SYBR		Unkn		82
	C02	SYBR		Unkn		82
	C03	SYBR		Unkn		82
	C04	SYBR		Unkn		85
	C05	SYBR		Unkn		85
	C06	SYBR		Unkn		85
	C07	SYBR		Unkn		78
	C08	SYBR		Unkn		78
	C09	SYBR		Unkn		78
	C10	SYBR		Unkn		81.5
	C11	SYBR		Unkn		81.5
	C12	SYBR		Unkn		81.5
	D01	SYBR		Unkn		82.5
	D02	SYBR		Unkn		82
	D03	SYBR		Unkn		82
	D04	SYBR		Unkn		85
	D05	SYBR		Unkn		85
	D06	SYBR		Unkn		85
	D07	SYBR		Unkn		78
	D08	SYBR		Unkn		78
	D09	SYBR		Unkn		78
	D10	SYBR		Unkn		81
	D11	SYBR		Unkn		81
	D12	SYBR		Unkn		81.5
	E01	SYBR		Unkn		84.5
	E02	SYBR		Unkn		84.5
	E03	SYBR		Unkn		84.5
	E04	SYBR		Unkn		84.5
	E05	SYBR		Unkn		84.5
	E06	SYBR		Unkn		84.5
	E07	SYBR		Unkn		84.5
	E08	SYBR		Unkn		84.5
	E09	SYBR		Unkn		84.5
	E10	SYBR		Unkn		84.5
	E11	SYBR		Unkn		84.5
	E12	SYBR		Unkn		84.5
	F01	SYBR		Unkn		None
	F02	SYBR		Unkn		None
	F03	SYBR		Unkn		None
	F04	SYBR		Unkn		None
	F05	SYBR		Unkn		None
	F06	SYBR		Unkn		None
	F07	SYBR		Unkn		None
	F08	SYBR		Unkn		None
	F09	SYBR		Unkn		None
	F10	SYBR		Unkn		None
	F11	SYBR		Unkn		None
	F12	SYBR		Unkn		None
	G01	SYBR		Unkn		None
	G02	SYBR		Unkn		None
	G03	SYBR		Unkn		None
	G04	SYBR		Unkn		None
	G05	SYBR		Unkn		None
	G06	SYBR		Unkn		None
	G07	SYBR		Unkn		None
	G08	SYBR		Unkn		None
	G09	SYBR		Unkn		None
	G10	SYBR		Unkn		None
	G11	SYBR		Unkn		None
	G12	SYBR		Unkn		None
	H01	SYBR		Unkn		None
	H02	SYBR		Unkn		None
	H03	SYBR		Unkn		None
	H04	SYBR		Unkn		None
	H05	SYBR		Unkn		None
	H06	SYBR		Unkn		None
	H07	SYBR		Unkn		None
	H08	SYBR		Unkn		None
	H09	SYBR		Unkn		None
	H10	SYBR		Unkn		None
	H11	SYBR		Unkn		None
	H12	SYBR		Unkn		None

## Sheet: Run Information
File Name	admin_2022-03-21 14-55-21_BR008212.pcrd
Created By User	admin
Notes
ID
Run Started	03/21/2022 06:55:44 UTC
Run Ended	03/21/2022 08:41:29 UTC
Sample Vol	10
Lid Temp	105
Protocol File Name	1.prcl
Plate Setup File Name	2.pltd
Base Serial Number	BR008212
Optical Head Serial Number	788BR08065
CFX Manager Version	3.1.1517.0823.
