# Supplementary material for: Prognostic value of RNA methylation-related genes in gastric adenocarcinoma based on bioinformatics
Source: PeerJ. 2024 Feb 29;12:e16951. doi: 10.7717/peerj.16951 (PMC10909369; doi:10.7717/peerj.16951)
Supplement: Supplemental Information 28 [file peerj-12-16951-s028.xlsx]

## Sheet: SYBR
	Temperature	A1	A2	A3	A4	A5	A6	A7	A8	A9	A10	A11	A12	B1	B2	B3	B4	B5	B6	B7	B8	B9	B10	B11	B12	C1	C2	C3	C4	C5	C6	C7	C8	C9	C10	C11	C12	D1	D2	D3	D4	D5	D6	D7	D8	D9	D10	D11	D12
	65	3825.48	3863.31	3882.61	3837.28	3789.06	3996.45	4126.17	4066.42	4064.47	3928.05	3678.99	3592.81	2444.48	2358.4	2421.3	2415.05	3173.85	2924.71	3146.28	2537	2754.76	2349.25	2482.82	2382.65	3901.88	3977.36	4106.61	3989.6	4038.15	4165.06	4121.79	4248.45	4497.36	3737.44	3798.61	3729.4	3842.03	3978.64	3965.31	4102.24	3905.67	4111.86	4467.95	4275.84	4223.18	4147.58	4126.28	4119.09
	65.5	3810.05	3846.87	3864.83	3819.64	3771.67	3976.54	4106.36	4046.76	4044.63	3908.83	3664.04	3581.91	2443.44	2358.35	2420.77	2413.63	3159.91	2914.69	3125.43	2533	2746.77	2349.28	2480.07	2382.49	3884.35	3961.69	4084.61	3971.26	4019.37	4144.54	4100.49	4226.71	4473.73	3716.63	3781.22	3712.54	3822.66	3962.86	3945.85	4084.9	3890.81	4090.89	4443.58	4254.32	4202.73	4126.56	4106.56	4099.33
	66	3794.63	3830.43	3847.06	3802	3754.28	3956.64	4086.54	4027.11	4024.79	3889.61	3649.1	3571.01	2442.4	2358.3	2420.23	2412.21	3145.97	2904.68	3104.58	2529	2738.79	2349.31	2477.32	2382.34	3866.81	3946.03	4062.61	3952.92	4000.58	4124.02	4079.2	4204.97	4450.1	3695.83	3763.83	3695.68	3803.29	3947.08	3926.4	4067.56	3875.95	4069.92	4419.21	4232.81	4182.28	4105.54	4086.85	4079.57
	66.5	3779.21	3813.99	3829.28	3784.36	3736.89	3936.73	4066.73	4007.45	4004.95	3870.38	3634.15	3560.12	2441.35	2358.25	2419.69	2410.8	3132.02	2894.67	3083.73	2525	2730.8	2349.34	2474.58	2382.18	3849.28	3930.37	4040.6	3934.57	3981.79	4103.51	4057.9	4183.22	4426.47	3675.03	3746.45	3678.82	3783.92	3931.31	3906.95	4050.22	3861.1	4048.95	4394.84	4211.29	4161.83	4084.52	4067.13	4059.81
	67	3763.78	3797.54	3811.5	3766.72	3719.5	3916.82	4046.91	3987.8	3985.11	3851.16	3619.21	3549.22	2440.31	2358.2	2419.16	2409.38	3118.08	2884.65	3062.88	2521	2722.81	2349.37	2471.83	2382.03	3831.75	3914.7	4018.6	3916.23	3963	4082.99	4036.6	4161.48	4402.84	3654.23	3729.06	3661.96	3764.55	3915.53	3887.49	4032.88	3846.24	4027.98	4370.47	4189.77	4141.38	4063.5	4047.41	4040.04
	67.5	3748.36	3781.1	3793.73	3749.08	3702.11	3896.92	4027.1	3968.14	3965.28	3831.94	3604.26	3538.32	2439.27	2358.15	2418.62	2407.97	3104.14	2874.64	3042.03	2517	2714.83	2349.4	2469.08	2381.87	3814.21	3899.04	3996.6	3897.89	3944.21	4062.47	4015.3	4139.73	4379.21	3633.43	3711.67	3645.1	3745.19	3899.75	3868.04	4015.54	3831.38	4007.01	4346.1	4168.26	4120.94	4042.48	4027.69	4020.28
	68	3732.94	3764.66	3775.95	3731.44	3684.72	3877.01	4007.28	3948.49	3945.44	3812.72	3589.32	3527.43	2438.23	2358.11	2418.08	2406.55	3090.2	2864.63	3021.18	2513	2706.84	2349.43	2466.33	2381.72	3796.68	3883.37	3974.6	3879.55	3925.42	4041.95	3994	4117.99	4355.58	3612.63	3694.29	3628.24	3725.82	3883.98	3848.58	3998.2	3816.52	3986.03	4321.73	4146.74	4100.49	4021.46	4007.97	4000.52
	68.5	3715.37	3746.53	3757.63	3713.06	3666.95	3856.65	3987.01	3928.16	3925.05	3792.76	3571.72	3511.72	2436.81	2357.94	2417.43	2405.08	3071.62	2854.34	2994.56	2509.04	2698.7	2349.11	2462.84	2381.39	3777.88	3864.45	3953	3858.32	3903.7	4021.07	3972.4	4096.2	4331.46	3588.79	3675.56	3609.25	3705.84	3864.75	3829.21	3977.85	3798.33	3964.67	4297.65	4124.39	4079.6	3999.69	3985.84	3979.19
	69	3697.21	3728.17	3739.2	3694.54	3648.81	3836.35	3966.6	3907.72	3904.71	3772.86	3553.28	3494.09	2434.96	2357.61	2416.67	2403.41	3046.98	2843.93	2960.4	2504.91	2689.78	2348.82	2459.48	2380.61	3758.87	3844.17	3931.67	3836.03	3880.92	4000.17	3950.96	4073.94	4307.16	3563.28	3656.35	3589.61	3685.54	3843.85	3810.2	3956.34	3778.43	3943.26	4273.84	4101.87	4058.54	3977.89	3962.84	3957.52
	69.5	3678.88	3709.51	3720.47	3676.41	3630.58	3815.91	3946.01	3887.38	3884.4	3753.19	3535.16	3476.21	2433.42	2357.58	2416	2402.13	3014.29	2833.33	2917.84	2501.21	2679.63	2348.5	2456.35	2379.65	3739.37	3823.87	3910.26	3813.6	3857.65	3979.28	3929.87	4051.38	4283.24	3537.12	3636.58	3570.41	3665.8	3822.53	3790.93	3934.03	3758.4	3921.69	4249.89	4079.54	4037.3	3955.63	3939.88	3935.73
	70	3660.63	3690.49	3701.77	3657.98	3612.5	3795.7	3925.43	3867.26	3863.74	3733.75	3517.4	3458.51	2431.85	2357.62	2415.19	2400.74	2970.98	2822.71	2867.28	2497.4	2668.54	2348.23	2453.71	2378.59	3719.55	3803.57	3889.18	3791.11	3834.5	3958.43	3909.04	4028.93	4259.68	3510.99	3616.33	3551.18	3646.09	3801.2	3772.05	3911.59	3738.18	3900.46	4226.31	4056.98	4016.1	3933.71	3917.14	3913.99
	70.5	3642.43	3671.61	3683.07	3639.64	3594.75	3775.67	3904.59	3847.07	3843.27	3714.24	3499.7	3441.04	2430.49	2357.89	2414.56	2399.54	2915.82	2812.29	2811.02	2493.48	2656.15	2348.29	2451.57	2377.34	3699.66	3783.05	3867.89	3768.38	3811.43	3937.51	3888.13	4006.26	4236.53	3485.88	3595.92	3532.29	3626.63	3779.93	3753.19	3889.15	3717.88	3879.28	4202.77	4034.86	3994.78	3911.99	3894.54	3892.25
	71	3624.52	3653.4	3664.38	3621.21	3576.69	3755.51	3884.11	3826.94	3822.91	3694.82	3481.87	3424	2429.28	2358.39	2413.78	2398.58	2849.14	2802.07	2752.05	2489.73	2643.07	2348.62	2449.7	2376.02	3679.53	3762.61	3846.46	3745.78	3788.31	3916.68	3867.59	3983.37	4213.72	3462.41	3575.51	3513.92	3607.25	3758.84	3734.18	3866.49	3697.35	3858.26	4178.74	4013.11	3973.18	3890.36	3872.12	3870.37
	71.5	3606.68	3635.23	3645.81	3602.63	3558.87	3735.12	3863.56	3806.74	3802.61	3675.18	3463.9	3406.67	2428.23	2359.06	2412.95	2397.92	2774.19	2791.9	2694.01	2485.98	2630.79	2349	2447.92	2375.13	3659.89	3742.08	3825.26	3723.23	3765.22	3895.9	3846.73	3961.06	4191.19	3440.33	3554.74	3495.59	3588.39	3738	3715.06	3843.45	3676.47	3837.08	4154.7	3991.46	3951.6	3868.67	3849.55	3848.54
	72	3589.04	3617.21	3627.66	3583.61	3541.28	3714.85	3843.13	3786.27	3782.07	3655.31	3445.62	3388.57	2426.69	2359.57	2411.85	2396.96	2696.59	2781.99	2639.82	2481.46	2619.85	2349.51	2445.78	2374.69	3640.72	3721.51	3804.44	3700.73	3742.31	3874.92	3825.71	3939.32	4168.61	3419.12	3534.23	3477.06	3569.4	3717.61	3696.44	3820.78	3655.22	3816.02	4130.99	3969.55	3930.32	3847.46	3826.89	3826.74
	72.5	3571.67	3599.58	3609.74	3564.9	3523.74	3694.52	3822.78	3765.67	3762.05	3635.26	3427.11	3370.86	2424.98	2360.32	2410.46	2396.27	2622.68	2772.29	2591.68	2476.42	2609.81	2350.02	2443.54	2373.97	3621.99	3700.97	3783.54	3678.39	3719.45	3854.09	3804.49	3917.39	4145.98	3398.79	3513.64	3458.33	3550.93	3697.55	3677.9	3798.38	3633.99	3794.4	4107.26	3948.12	3909.09	3825.83	3804.2	3804.54
	73	3554.57	3582.18	3592.17	3545.97	3506.06	3674.11	3802.84	3745.72	3741.77	3615.16	3408.73	3353.3	2422.86	2360.96	2408.84	2395.49	2557.84	2762.67	2549.88	2470.26	2601.1	2350.46	2441.19	2373.57	3604.26	3680.83	3762.81	3656.08	3696.8	3833.53	3783.4	3895.92	4122.91	3378.53	3492.6	3439.06	3532.55	3677.83	3659.64	3775.96	3612.84	3772.88	4083.8	3926.63	3888.19	3804.07	3781.22	3782.66
	73.5	3537.39	3564.61	3574.69	3527.18	3488.36	3653.61	3782.84	3725.9	3721.6	3595.08	3390.65	3335.84	2420.16	2361.49	2407.23	2394.72	2506.06	2752.85	2515.07	2462.46	2593.1	2350.88	2438.81	2373.46	3587.37	3660.52	3742.09	3633.75	3674.15	3812.85	3762.06	3874.7	4099.7	3357.85	3470.99	3419.17	3514.9	3657.93	3641.55	3753.74	3591.88	3751.25	4061.25	3905.4	3867.55	3782.08	3758.2	3760.35
	74	3520.62	3547.14	3557.6	3508.24	3470.34	3632.7	3763.19	3706.27	3701.15	3574.78	3372.85	3318.45	2416.49	2361.83	2405.34	2393.76	2468.2	2742.44	2487.48	2452.88	2584.55	2351.13	2436.38	2372.92	3570.43	3639.91	3721.16	3611.42	3651.36	3791.95	3741.19	3853.16	4076.51	3336.51	3449.09	3399.07	3497.33	3638.01	3623.51	3731.76	3571.21	3729.78	4039.07	3884.42	3847.17	3759.65	3735.03	3737.79
	74.5	3503.89	3530.03	3540.64	3489.12	3451.53	3611.06	3743.44	3686.87	3681.31	3554.53	3355.35	3301.59	2411.81	2362.12	2402.71	2393.19	2442.78	2729.86	2466.97	2442.35	2574.26	2351.32	2434.18	2371.88	3553.56	3619.32	3700.31	3588.77	3628.47	3770.9	3720.4	3831.38	4053.32	3314.91	3426.15	3378.54	3480.07	3617.62	3605.37	3709.6	3550.58	3708.49	4017.01	3864.06	3826.48	3736.69	3711.76	3715
	75	3487	3513.04	3523.59	3469.29	3432.13	3588.74	3723.25	3667.19	3660.64	3533.95	3337.69	3284.2	2405.96	2362.15	2399.49	2392.51	2426.85	2712.76	2452.01	2431.37	2561.1	2351.65	2432.04	2371.27	3536.59	3598.8	3679.88	3565.55	3605.23	3748.92	3699.59	3809.23	4029.44	3293.13	3402.26	3357.84	3462.74	3596.96	3587.24	3687.17	3529.91	3687.96	3994.59	3843.37	3805.47	3713.21	3688.06	3692.33
	75.5	3470.13	3495.84	3506.63	3449.06	3412.18	3566.04	3699.77	3644.74	3637.32	3513.05	3319.32	3266.35	2399.25	2362.31	2395.75	2391.57	2417.7	2687.83	2441.72	2421.06	2543.84	2351.99	2429.68	2370.62	3518.71	3578.12	3659.65	3542.13	3581.59	3725.91	3675.21	3783.35	4001.54	3271.05	3377.2	3336.9	3445.61	3576.35	3569.32	3664.95	3509.08	3667.58	3965.95	3817.7	3779.44	3688.79	3664.11	3669.05
	76	3453.39	3478.45	3489.7	3428.47	3392.04	3543.06	3661.04	3608.9	3599.59	3491.31	3300.45	3247.93	2392.03	2362.57	2391.32	2390.72	2412.52	2653.96	2434.36	2412.23	2522.38	2352.27	2427.33	2369.6	3500.07	3557.71	3639.8	3518.55	3557.85	3702.44	3634.35	3740.2	3954.81	3248.91	3351.76	3315.45	3427.95	3556.03	3551.63	3642.78	3488.24	3647.22	3916.16	3772.91	3734.97	3663.47	3639.27	3645.62
	76.5	3436.26	3461.18	3472.56	3407.66	3371.79	3520.42	3597.3	3548.96	3537.68	3469.35	3281.04	3229.5	2385.52	2362.92	2386.62	2390.15	2409.85	2611.75	2428.62	2405.71	2498	2352.81	2425.14	2368.93	3481.04	3538.06	3620.16	3494.75	3534.2	3678.47	3564.98	3666.65	3875.77	3227.07	3325.49	3293.26	3410.34	3535.88	3534.36	3620.56	3467.32	3627.28	3832	3696.38	3659.59	3637.3	3613.85	3621.72
	77	3419.03	3443.82	3455.27	3387.11	3352.08	3498.53	3504.86	3459.44	3446.68	3446.53	3260.84	3210.59	2380.6	2363.53	2382.75	2389.49	2408.51	2564.49	2422.98	2401.09	2472.17	2353.46	2422.66	2368.4	3461.78	3518.53	3600.83	3471.52	3510.7	3654.38	3457.55	3551.94	3753.93	3204.81	3298.87	3270.68	3392.78	3516.31	3517.47	3598.46	3446.51	3607.47	3702.75	3577.33	3543.38	3609.82	3587.67	3597.14
	77.5	3401.67	3426.3	3438.39	3367.2	3332.54	3477.36	3381.77	3338.78	3326.23	3422.78	3240.36	3191.32	2377.24	2363.92	2379.79	2388.72	2408.07	2517.07	2417.42	2397.88	2447.58	2353.94	2420.14	2367.51	3442.19	3499.3	3581.77	3448.95	3487.28	3631.06	3309.88	3393.52	3586.95	3181.42	3271.99	3247.58	3375.36	3497.07	3500.72	3576.42	3425.89	3587.24	3526.23	3413.02	3383.31	3581.05	3560.36	3571.62
	78	3383.87	3408.98	3421.13	3347.73	3313.34	3456.56	3231.36	3189.25	3180.2	3397.91	3219.73	3171.41	2375.38	2364.27	2377.54	2388.49	2407.9	2476.97	2411.72	2395.39	2426.83	2354.24	2417.82	2366.61	3422.75	3480.3	3562.88	3426.44	3464.31	3608.61	3128.83	3197.54	3382.77	3156.91	3245.14	3223.75	3357.98	3477.65	3483.46	3553.97	3405.37	3566.41	3314.19	3213.53	3188.91	3549.65	3530.26	3544.18
	78.5	3365.98	3391.87	3403.76	3328.31	3294.43	3436.28	3077.86	3032.62	3031.5	3371.4	3197.61	3150.28	2374.78	2364.47	2376.35	2388.02	2408.43	2447.18	2406.32	2393.34	2410.62	2354.66	2415.41	2365.8	3403.25	3461.1	3543.71	3404.14	3441.6	3586.85	2940.01	2992.18	3170.96	3130.71	3216.54	3199.41	3340.93	3458.1	3465.84	3531.04	3384.53	3544.95	3096.38	3006.71	2987.4	3512.57	3494.79	3511.85
	79	3348.1	3374.32	3385.88	3308.98	3275.62	3415.47	2940.53	2889.76	2900.42	3337.81	3170.19	3124.23	2375	2364.84	2375.88	2387.33	2408.81	2428.35	2401.24	2391.31	2398.52	2355.12	2412.47	2364.82	3383.49	3440.79	3524.24	3381.89	3418.58	3565.88	2767.96	2804.36	2978.96	3100.38	3184.68	3172.86	3323.8	3437.93	3447.43	3507.57	3363.3	3521.74	2899.94	2818.81	2804.66	3463.98	3447.73	3469.17
	79.5	3328.53	3354.41	3365.53	3289	3256.72	3394.01	2827.6	2771.07	2795.35	3285.82	3127.48	3085.19	2375.34	2364.89	2375.93	2386.41	2409.01	2418.49	2397.22	2389.14	2390.57	2355.24	2409.44	2364.03	3361.61	3417.96	3501.33	3358.99	3395.21	3545.43	2632.75	2656.26	2828.89	3058.95	3141.92	3136.57	3305.74	3415.42	3425.44	3483.37	3341.4	3496.89	2747.31	2671.64	2661.61	3393.8	3378.05	3405.79
	80	3298.66	3322.68	3331.69	3268.7	3238.02	3372.05	2743.84	2680.77	2718.74	3206.7	3061.06	3026.6	2375.87	2365.49	2376.15	2385.55	2408.99	2415.15	2394.29	2387.14	2385.72	2355.55	2405.4	2363.19	3329.06	3382.43	3462.63	3336.15	3371.89	3524.8	2540.01	2554.83	2727.86	2997.89	3080.78	3083.78	3281.63	3380.03	3387.5	3458.45	3319.1	3470.8	2645.07	2572.69	2565.45	3297.34	3278.32	3314.24
	80.5	3246.86	3265.98	3272.07	3248.14	3219.34	3349.92	2688.95	2620.09	2667.6	3098.59	2969.03	2947.49	2376.47	2365.92	2376.59	2384.48	2409	2414.05	2392.6	2385.6	2382.48	2355.95	2400.3	2362.08	3272.19	3321.39	3393.74	3314.27	3347.97	3503.98	2487	2497.71	2671.49	2916.51	2997.39	3014.79	3238.41	3318.48	3321.53	3433.02	3296.33	3443.7	2587.71	2516.93	2511.15	3176.86	3150.11	3195.79
	81	3168.5	3177.78	3180.56	3227.65	3200.32	3327.15	2648.04	2577.39	2629.02	2964.21	2853.95	2848.01	2377.25	2366.66	2376.95	2383.63	2408.43	2413.95	2391.64	2384.56	2380.8	2356.15	2394.43	2360.75	3185.01	3229.15	3288.14	3292.92	3323.44	3482.35	2461.25	2470.16	2644.93	2816.75	2893.73	2930.65	3167.9	3223.63	3222.11	3406.98	3273.18	3415.7	2559.92	2490.51	2485.32	3037.26	3000.69	3056.74
	81.5	3063.41	3058.04	3057.79	3206.68	3180.52	3304.64	2612.22	2542.78	2592.98	2814.26	2724.09	2734.22	2377.83	2367.18	2377.4	2382.83	2407.87	2413.72	2391.15	2383.86	2380.21	2356.33	2388.15	2359.4	3067.99	3106.36	3145.95	3271.73	3298.51	3459.27	2449.56	2458.01	2634.05	2704.13	2774.2	2835.51	3068.87	3095.24	3089.87	3380.12	3249.5	3387.18	2548.04	2479.72	2474.44	2891.02	2842.74	2907.68
	82	2934.8	2911.13	2908.61	3184.81	3158.77	3280.96	2577.53	2512.23	2555.84	2673.41	2600.61	2623.65	2378.4	2367.87	2377.48	2382.28	2407.29	2413.38	2390.98	2383.56	2380.13	2356.94	2381.63	2357.93	2924.87	2957.73	2973.22	3249.77	3272.1	3433.53	2441.46	2449.81	2627.72	2594.58	2654.71	2744.69	2943.29	2937.19	2930.41	3351.46	3224.42	3356.76	2540.51	2473.55	2467.9	2759.47	2699.02	2768.46
	82.5	2800.86	2756.86	2754.59	3158.35	3131.94	3251.85	2542.44	2484.65	2517.67	2561.05	2500.99	2530.85	2378.84	2368.33	2377.85	2381.66	2407.04	2412.86	2390.75	2383.76	2380.23	2357.54	2376.36	2356.57	2773.68	2803.59	2794.91	3222.47	3239.8	3401.54	2433.85	2441.77	2621.49	2507.47	2551.25	2672.09	2801.7	2771.38	2769.6	3317.02	3194.1	3319.25	2533.43	2467.66	2461.72	2653.06	2587.01	2655.08
	83	2685	2622.26	2622.07	3119.18	3092.31	3208.23	2508.71	2459.65	2482.8	2482.35	2430.56	2459.58	2379.35	2368.92	2378.2	2380.74	2406.5	2412.36	2390.42	2384.11	2380.47	2358.62	2372.71	2355.71	2642.16	2670.64	2641.44	3179.97	3193.17	3354.93	2426.48	2433.28	2615.89	2445.84	2473.06	2618	2670.7	2625.67	2633.29	3268.62	3151.7	3266.55	2526.28	2461.76	2456.31	2572.19	2509.05	2569.11
	83.5	2595.31	2520.8	2523.93	3059.63	3032.81	3142.93	2482.42	2439.88	2454.92	2435.69	2387.87	2412.14	2379.81	2369.29	2378.69	2379.38	2406	2411.38	2390.3	2384.24	2380.68	2359.91	2370.31	2355.69	2542.44	2571.52	2527.52	3114.3	3124.12	3287.18	2419	2425.27	2610.87	2408.3	2420.68	2577.97	2566.89	2515.16	2532.26	3200.11	3092.09	3193.44	2519.44	2455.99	2451.27	2516.9	2460.91	2508.05
	84	2531.08	2454.36	2460.61	2977.58	2951.45	3053.09	2462.81	2425.77	2434.19	2415.85	2369.02	2387.28	2380.31	2369.9	2379.41	2377.9	2405.35	2410.16	2390.39	2384.53	2381.02	2361.26	2369.39	2355.81	2474.4	2506.9	2454.18	3022.95	3029.77	3196.82	2412.89	2418.62	2606.51	2391.68	2392.26	2548.69	2492.83	2442	2466.74	3109.42	3013.96	3098.42	2512.44	2450.4	2446.5	2481.15	2436.35	2468.24
	84.5	2491.27	2420.57	2429.22	2874.32	2850.3	2941.19	2449.8	2416.66	2420.22	2409.57	2363.02	2375.65	2380.88	2370.54	2380.29	2375.95	2404.82	2409.12	2390.35	2385.08	2381.51	2362.36	2369.62	2356.32	2435.98	2473.82	2418.22	2908.14	2912.16	3085.97	2408.31	2413.65	2602.14	2387.73	2379.73	2522.27	2447.67	2404.03	2434.15	2997.44	2917.85	2983	2505.14	2444.8	2441.97	2454.77	2424.12	2442.64
	85	2466.4	2409.35	2419.07	2756.81	2736.15	2815.96	2442.4	2411.42	2411.72	2406.68	2360.8	2369.89	2381.47	2371.09	2380.77	2374.11	2403.87	2408.18	2390.69	2385.61	2382.17	2363.38	2370.21	2357.17	2418.06	2461.96	2407.04	2778.11	2780.2	2962.76	2405	2409.99	2598.04	2386.1	2374.91	2492.35	2426.11	2390.21	2421.07	2871.52	2810.4	2857.04	2497.03	2438.91	2437.61	2433.51	2414.96	2423.42
	85.5	2445.77	2406.67	2416.57	2641.86	2625.17	2695.84	2438.48	2408.99	2405.86	2404.42	2359.2	2367.58	2381.93	2371.84	2381.38	2372.61	2403.35	2407.5	2391.19	2386.34	2382.86	2363.79	2370.86	2357.97	2406.52	2457.58	2405.07	2651.58	2652.48	2844.71	2402.52	2407.6	2594.18	2384.56	2372.43	2459.53	2414.84	2386.09	2414.21	2748.8	2705.84	2737.77	2488.05	2432.71	2432.97	2417.26	2406.86	2409.36
	86	2426.56	2405.61	2414.81	2545.52	2533	2596.64	2434.77	2407.67	2400.92	2402.78	2358.58	2367.05	2382.5	2372.54	2382.11	2371.55	2403.12	2407.22	2391.64	2387.52	2383.47	2364.3	2371.75	2358.26	2396.46	2454.46	2404.11	2546.25	2546.17	2746.92	2400.97	2405.75	2590.63	2383.2	2370.98	2431.18	2405.88	2383.92	2408.67	2642.89	2615.52	2636.94	2477.76	2425.92	2428.1	2404.58	2400.17	2399.79
	86.5	2411.92	2404.83	2413.4	2474.53	2465.97	2524.42	2431.57	2406.93	2396.61	2401.26	2358.05	2366.57	2383.07	2373.09	2382.63	2370.78	2403.25	2407.41	2392.21	2388.69	2383.97	2364.72	2372.47	2358.93	2388.31	2452.04	2403.52	2469.63	2469.02	2674.99	2399.27	2404.33	2587.2	2382.34	2370.01	2409.77	2398.82	2382.11	2404.35	2559.18	2543.07	2558.96	2466.84	2419.1	2423.4	2395.49	2394.83	2393.74
	87	2401.51	2404.13	2412.29	2429.54	2424.22	2478.73	2428.86	2406.34	2393.13	2400.25	2357.67	2366.46	2383.46	2373.66	2383.32	2370.6	2403.48	2407.82	2392.98	2389.69	2384.47	2365.03	2373.01	2359.28	2382.36	2450.18	2403.11	2421.58	2421.15	2629.28	2397.59	2402.93	2584.54	2381.51	2369.54	2395.65	2393.51	2380.82	2400.82	2499.45	2490.2	2505.58	2455.77	2412.35	2419.12	2389.71	2390.57	2389.17
	87.5	2395.67	2403.34	2411.51	2407.18	2404.11	2455.36	2426.72	2405.88	2390.75	2399.83	2357.64	2366.19	2383.94	2374.35	2384.21	2370.74	2404.07	2408.48	2393.51	2390.55	2385.03	2365.24	2373.64	2359.8	2378.57	2448.86	2402.67	2398.27	2398.2	2605.82	2396.06	2401.68	2582.57	2380.81	2369.02	2387.93	2389.84	2379.52	2398.56	2462	2455.31	2473.03	2445.74	2406.67	2415.22	2386.28	2387.55	2385.85
	88	2393.14	2402.54	2411.08	2398.94	2397.35	2444.89	2425.3	2405.73	2389.42	2399.65	2358.07	2366.15	2384.61	2374.87	2385.05	2371.08	2404.55	2409.17	2393.9	2391.26	2385.85	2365.65	2374.39	2360.18	2376.86	2448.28	2402.21	2390.35	2390.22	2595.34	2394.74	2400.62	2580.69	2380.5	2368.78	2385.88	2387.68	2378.66	2397.43	2438.35	2431.59	2452.67	2437.16	2402.25	2412.16	2384.19	2385.4	2383.43
	88.5	2393.13	2401.95	2411.09	2396.16	2395.48	2439.09	2424.34	2405.74	2388.61	2399.52	2358.3	2365.82	2385.18	2375.5	2385.62	2371.62	2404.92	2409.77	2394.28	2391.49	2386.71	2365.82	2375.1	2360.93	2376.1	2447.77	2401.85	2388.25	2388.45	2590.19	2394.04	2400.03	2578.81	2380.54	2368.76	2385.71	2386.52	2377.91	2396.51	2421.55	2413.41	2438.33	2430.58	2399.37	2409.94	2383.04	2384.13	2381.94
	89	2393.43	2401.53	2411.18	2394.92	2394.9	2434.77	2423.71	2405.6	2388.24	2399.49	2358.79	2365.68	2385.88	2376.19	2386.21	2372.29	2405.21	2410.46	2394.64	2391.47	2387.65	2365.74	2375.81	2361.39	2375.83	2447.09	2401.26	2387.42	2388.1	2586.86	2393.78	2399.42	2577.2	2380.59	2369.1	2385.79	2385.53	2377.42	2395.52	2409.55	2399.62	2428.16	2425.9	2397.57	2408.45	2382.78	2383.32	2381.38
	89.5	2393.76	2401.43	2411.45	2394.2	2394.75	2431.6	2423.06	2405.63	2388.21	2399.74	2359.6	2365.71	2386.74	2376.86	2386.83	2372.99	2405.46	2410.97	2394.93	2391.65	2388.59	2366.11	2376.66	2362.04	2375.76	2446.68	2400.58	2387.32	2388.17	2584.11	2393.82	2399.16	2575.42	2381.05	2369.17	2385.83	2384.74	2376.82	2394.96	2401.67	2390.11	2421.18	2422.9	2396.82	2407.42	2382.95	2382.92	2381.42
	90	2393.87	2401.69	2411.61	2393.68	2394.73	2429.37	2422.6	2405.62	2388.04	2399.81	2360.09	2365.72	2387.57	2377.57	2387.41	2373.62	2405.74	2411.21	2395.57	2391.6	2389.44	2366.7	2377.1	2362.49	2375.72	2446.55	2400.1	2387.42	2388.43	2581.79	2394.25	2399.17	2573.9	2381.78	2369.43	2386.17	2384.04	2376.67	2394.06	2396.38	2383.45	2416.43	2421.05	2396.23	2406.89	2383.22	2382.54	2381.88
	90.5	2394.06	2402.16	2411.68	2393.23	2394.93	2427.97	2422.11	2405.46	2387.87	2399.85	2360.29	2365.3	2388.28	2378.19	2387.91	2374.26	2406.13	2411.38	2396.5	2391.54	2389.92	2367.45	2377.17	2363.24	2375.75	2446.33	2399.44	2387.58	2388.87	2580.13	2394.83	2399.4	2572.8	2382.57	2369.73	2386.42	2383.37	2376.4	2393.09	2393.14	2379.36	2413.35	2420.19	2395.94	2406.53	2383.59	2382.55	2382.33
	91	2394.29	2402.59	2411.66	2393.28	2395.42	2427.35	2421.92	2405.36	2387.73	2399.81	2360.57	2365.07	2388.91	2378.97	2388.58	2374.82	2406.75	2411.89	2397.58	2391.95	2390.38	2368.46	2377.18	2363.83	2375.93	2446.18	2399.04	2388.01	2389.36	2578.44	2395.08	2399.53	2572.09	2383.36	2370.08	2386.6	2382.89	2376.43	2392.8	2391.89	2377.48	2412.09	2419.94	2395.59	2406.35	2384.12	2382.68	2382.81
	91.5	2394.63	2403.02	2411.74	2393.52	2396.07	2427.37	2421.84	2405.47	2387.56	2399.8	2360.75	2365.02	2389.49	2379.7	2389.17	2375.39	2407.41	2412.27	2398.51	2392.72	2390.86	2369.86	2377.29	2364.54	2376.35	2446.24	2398.98	2388.81	2389.86	2577.04	2395.26	2399.99	2571.49	2383.94	2370.53	2386.76	2382.71	2376.37	2392.91	2391.88	2376.93	2411.76	2419.79	2395.24	2406.47	2384.46	2382.93	2383.01
	92	2395.08	2403.24	2411.91	2393.85	2396.52	2427.64	2422.22	2405.58	2387.2	2399.73	2360.86	2365.01	2390.05	2380.5	2389.56	2376.03	2408.05	2412.74	2399.53	2393.31	2391.25	2370.93	2377.47	2365.39	2376.77	2446.08	2399.24	2389.52	2390.35	2575.83	2395.38	2400.22	2570.99	2384.32	2371.11	2387.22	2382.45	2376.54	2392.85	2391.96	2376.73	2411.5	2419.56	2394.81	2406.8	2384.62	2383.41	2383.07
	92.5	2395.38	2403.23	2412.1	2394.06	2397.07	2427.86	2422.8	2406.18	2387.25	2399.94	2361.4	2365.44	2390.47	2381.22	2390.04	2376.61	2408.64	2413.56	2400.26	2394.43	2391.48	2371.89	2378.14	2366.32	2377.25	2445.64	2399.64	2389.95	2390.72	2574.83	2395.18	2400.53	2570.29	2384.59	2371.88	2387.44	2382.24	2376.52	2393.25	2392.27	2377.04	2411.45	2419.45	2394.71	2407.17	2384.8	2384.15	2382.9
	93	2395.65	2403.44	2412.29	2394.35	2397.41	2427.93	2423.42	2406.87	2387.18	2399.99	2361.77	2365.92	2390.97	2382.19	2390.67	2377.03	2409.3	2414.59	2400.66	2395.7	2392.27	2372.86	2379.17	2367.28	2377.77	2445.25	2400.32	2390.4	2391.01	2574.02	2395.02	2400.83	2569.56	2384.76	2372.53	2387.9	2382.16	2376.66	2393.79	2392.68	2377.88	2411.74	2419.16	2394.78	2407.58	2384.99	2385	2383.23
	93.5	2395.84	2403.57	2412.41	2394.42	2397.77	2428.02	2424.28	2407.56	2387.48	2400.51	2362.32	2366.55	2391.42	2382.97	2391.51	2377.38	2409.79	2415.07	2401.01	2396.92	2393.19	2373.61	2380.37	2368.34	2378.12	2444.94	2400.92	2390.78	2391.02	2573.75	2394.86	2401.14	2568.84	2385.05	2373.1	2388.72	2381.91	2376.74	2393.98	2392.82	2379.33	2412.06	2418.79	2394.99	2407.96	2385.27	2385.64	2383.72
	94	2396.03	2403.78	2412.35	2394.73	2397.77	2427.77	2424.9	2407.95	2387.74	2400.52	2361.9	2365.9	2391.89	2384.04	2392.67	2377.19	2410.74	2416.08	2400.87	2398.07	2394.72	2374.66	2381.27	2369.81	2378.24	2445.05	2401.49	2391.15	2390.8	2573.84	2394.68	2400.98	2568.99	2385.04	2373.87	2389.33	2382.1	2377.01	2394.09	2392.67	2381.79	2412.07	2418.65	2395.85	2408.04	2385.71	2386.55	2384.54
	94.5	2396.13	2404.19	2412.18	2394.93	2397.86	2427.4	2425.48	2408.36	2388.17	2400.6	2361.59	2365.33	2392.34	2385.09	2394.01	2376.91	2411.7	2416.97	2400.69	2399.43	2396.46	2375.73	2382.33	2371.18	2378.38	2445.17	2401.99	2391.46	2390.54	2574.16	2394.53	2401.06	2569.09	2385.22	2374.54	2390.01	2382.24	2377.28	2394.3	2392.49	2384.47	2412.39	2418.65	2396.81	2407.98	2386.17	2387.39	2385.63
	95	2396.68	2404.6	2411.75	2395.93	2397.47	2426.76	2425.32	2408	2388.31	2399.42	2358.83	2361.97	2392.95	2386.54	2395.7	2375.57	2413.7	2418.7	2399.33	2400.55	2399.39	2377.71	2382.28	2373.42	2378.35	2446.55	2402.44	2392.3	2389.71	2575.13	2394.22	2400.12	2571.37	2384.21	2376.14	2389.78	2383.7	2377.69	2394.38	2391.96	2388.76	2411.54	2418.9	2398.95	2407.62	2387.1	2388.31	2386.98
[truncated: 48 more columns]

## Sheet: Run Information
File Name	admin_2022-03-21 14-55-21_BR008212.pcrd
Created By User	admin
Notes
ID
Run Started	03/21/2022 06:55:44 UTC
Run Ended	03/21/2022 08:41:29 UTC
Sample Vol	10
Lid Temp	105
Protocol File Name	1.prcl
Plate Setup File Name	2.pltd
Base Serial Number	BR008212
Optical Head Serial Number	788BR08065
CFX Manager Version	3.1.1517.0823.
