# Supplementary material for: Prognostic value of RNA methylation-related genes in gastric adenocarcinoma based on bioinformatics
Source: PeerJ. 2024 Feb 29;12:e16951. doi: 10.7717/peerj.16951 (PMC10909369; doi:10.7717/peerj.16951)
Supplement: Supplemental Information 29 [file peerj-12-16951-s029.xlsx]

## Sheet: SYBR
		1	2	3	4	5	6	7	8	9	10	11	12
A	Content	Unkn	Unkn	Unkn	Unkn	Unkn	Unkn	Unkn	Unkn	Unkn	Unkn	Unkn	Unkn
A	Sample
A	Peak 1	82	82	82	85	85	85	78	78	78	81.5	81.5	81.5
A	Peak 2	None	None	None	None	None	None	None	None	None	None	None	None
B	Content	Unkn	Unkn	Unkn	Unkn	Unkn	Unkn	Unkn	Unkn	Unkn	Unkn	Unkn	Unkn
B	Sample
B	Peak 1	None	None	None	None	71.5	None	None	None	None	None	None	None
B	Peak 2	None	None	None	None	None	None	None	None	None	None	None	None
C	Content	Unkn	Unkn	Unkn	Unkn	Unkn	Unkn	Unkn	Unkn	Unkn	Unkn	Unkn	Unkn
C	Sample
C	Peak 1	82	82	82	85	85	85	78	78	78	81.5	81.5	81.5
C	Peak 2	None	None	None	None	None	None	None	None	None	None	None	None
D	Content	Unkn	Unkn	Unkn	Unkn	Unkn	Unkn	Unkn	Unkn	Unkn	Unkn	Unkn	Unkn
D	Sample
D	Peak 1	82.5	82	82	85	85	85	78	78	78	81	81	81.5
D	Peak 2	None	None	None	None	None	None	None	None	None	None	None	None
E	Content	Unkn	Unkn	Unkn	Unkn	Unkn	Unkn	Unkn	Unkn	Unkn	Unkn	Unkn	Unkn
E	Sample
E	Peak 1	84.5	84.5	84.5	84.5	84.5	84.5	84.5	84.5	84.5	84.5	84.5	84.5
E	Peak 2	None	None	None	None	None	None	None	None	None	None	None	None
F	Content	Unkn	Unkn	Unkn	Unkn	Unkn	Unkn	Unkn	Unkn	Unkn	Unkn	Unkn	Unkn
F	Sample
F	Peak 1	None	None	None	None	None	None	None	None	None	None	None	None
F	Peak 2	None	None	None	None	None	None	None	None	None	None	None	None
G	Content	Unkn	Unkn	Unkn	Unkn	Unkn	Unkn	Unkn	Unkn	Unkn	Unkn	Unkn	Unkn
G	Sample
G	Peak 1	None	None	None	None	None	None	None	None	None	None	None	None
G	Peak 2	None	None	None	None	None	None	None	None	None	None	None	None
H	Content	Unkn	Unkn	Unkn	Unkn	Unkn	Unkn	Unkn	Unkn	Unkn	Unkn	Unkn	Unkn
H	Sample
H	Peak 1	None	None	None	None	None	None	None	None	None	None	None	None
H	Peak 2	None	None	None	None	None	None	None	None	None	None	None	None

## Sheet: Run Information
File Name	admin_2022-03-21 14-55-21_BR008212.pcrd
Created By User	admin
Notes
ID
Run Started	03/21/2022 06:55:44 UTC
Run Ended	03/21/2022 08:41:29 UTC
Sample Vol	10
Lid Temp	105
Protocol File Name	1.prcl
Plate Setup File Name	2.pltd
Base Serial Number	BR008212
Optical Head Serial Number	788BR08065
CFX Manager Version	3.1.1517.0823.
