# Supplementary material for: Prognostic value of RNA methylation-related genes in gastric adenocarcinoma based on bioinformatics
Source: PeerJ. 2024 Feb 29;12:e16951. doi: 10.7717/peerj.16951 (PMC10909369; doi:10.7717/peerj.16951)
Supplement: Supplemental Information 30 [file peerj-12-16951-s030.xlsx]

## Sheet: 0
	Well	Fluor	Target	Content	Sample	Melt Temperature	Peak Height	Begin Temperature	End Temperature	Well Note
	A01	SYBR		Unkn		82	269.482	79	88.5
	A02	SYBR		Unkn		82	308.977	78.5	86.5
	A03	SYBR		Unkn		82	311.183	77.5	88.5
	A04	SYBR		Unkn		85	237.93	78.5	91
	A05	SYBR		Unkn		85	230.428	80	90
	A06	SYBR		Unkn		85	251.062	78.5	91
	A07	SYBR		Unkn		78	311.155	74.5	81.5
	A08	SYBR		Unkn		78	313.278	74.5	88
	A09	SYBR		Unkn		78	301.937	74.5	81
	A10	SYBR		Unkn		81.5	298.142	71	89
	A11	SYBR		Unkn		81.5	259.785	74.5	87
	A12	SYBR		Unkn		81.5	229.703	74.5	87
	B01	SYBR		Unkn		None	None	None	None
	B02	SYBR		Unkn		None	None	None	None
	B03	SYBR		Unkn		None	None	None	None
	B04	SYBR		Unkn		None	None	None	None
	B05	SYBR		Unkn		71.5	154.531	67.5	78
	B06	SYBR		Unkn		None	None	None	None
	B07	SYBR		Unkn		None	None	None	None
	B08	SYBR		Unkn		None	None	None	None
	B09	SYBR		Unkn		None	None	None	None
	B10	SYBR		Unkn		None	None	None	None
	B11	SYBR		Unkn		None	None	None	None
	B12	SYBR		Unkn		None	None	None	None
	C01	SYBR		Unkn		82	301.932	78.5	89.5
	C02	SYBR		Unkn		82	310.606	78	88
	C03	SYBR		Unkn		82	360.269	78.5	86.5
	C04	SYBR		Unkn		85	262.637	81.5	89.5
	C05	SYBR		Unkn		85	265.641	78.5	89
	C06	SYBR		Unkn		85	246.694	79.5	93.5
	C07	SYBR		Unkn		78	378.218	74.5	86
	C08	SYBR		Unkn		78	410.517	73.5	82
	C09	SYBR		Unkn		78	425.49	74.5	91.5
	C10	SYBR		Unkn		81.5	228.045	76.5	85
	C11	SYBR		Unkn		81.5	244.344	67.5	88
	C12	SYBR		Unkn		81.5	190.828	71	84
	D01	SYBR		Unkn		82.5	279.784	78.5	91.5
	D02	SYBR		Unkn		82	332.16	77.5	91
	D03	SYBR		Unkn		82	328.887	77	88
	D04	SYBR		Unkn		85	253.763	77	91.5
	D05	SYBR		Unkn		85	216.276	77.5	92
	D06	SYBR		Unkn		85	250.053	76.5	92.5
	D07	SYBR		Unkn		78	439.33	74.5	83.5
	D08	SYBR		Unkn		78	415.316	74.5	82
	D09	SYBR		Unkn		78	404.762	74.5	84.5
	D10	SYBR		Unkn		81	291.479	72	89
	D11	SYBR		Unkn		81	313.275	71	90.5
	D12	SYBR		Unkn		81.5	294.256	67.5	89
	E01	SYBR		Unkn		84.5	263.94	81	88
	E02	SYBR		Unkn		84.5	346.454	80	88
	E03	SYBR		Unkn		84.5	357.834	79.5	88
	E04	SYBR		Unkn		84.5	301.796	79.5	87.5
	E05	SYBR		Unkn		84.5	310.849	79.5	88
	E06	SYBR		Unkn		84.5	318.118	80	88
	E07	SYBR		Unkn		84.5	348.603	79	88
	E08	SYBR		Unkn		84.5	325.975	78.5	88
	E09	SYBR		Unkn		84.5	356.93	80	88
	E10	SYBR		Unkn		84.5	295.985	79	88
	E11	SYBR		Unkn		84.5	335.143	79.5	88
	E12	SYBR		Unkn		84.5	307.289	79	88
	F01	SYBR		Unkn		None	None	None	None
	F02	SYBR		Unkn		None	None	None	None
	F03	SYBR		Unkn		None	None	None	None
	F04	SYBR		Unkn		None	None	None	None
	F05	SYBR		Unkn		None	None	None	None
	F06	SYBR		Unkn		None	None	None	None
	F07	SYBR		Unkn		None	None	None	None
	F08	SYBR		Unkn		None	None	None	None
	F09	SYBR		Unkn		None	None	None	None
	F10	SYBR		Unkn		None	None	None	None
	F11	SYBR		Unkn		None	None	None	None
	F12	SYBR		Unkn		None	None	None	None
	G01	SYBR		Unkn		None	None	None	None
	G02	SYBR		Unkn		None	None	None	None
	G03	SYBR		Unkn		None	None	None	None
	G04	SYBR		Unkn		None	None	None	None
	G05	SYBR		Unkn		None	None	None	None
	G06	SYBR		Unkn		None	None	None	None
	G07	SYBR		Unkn		None	None	None	None
	G08	SYBR		Unkn		None	None	None	None
	G09	SYBR		Unkn		None	None	None	None
	G10	SYBR		Unkn		None	None	None	None
	G11	SYBR		Unkn		None	None	None	None
	G12	SYBR		Unkn		None	None	None	None
	H01	SYBR		Unkn		None	None	None	None
	H02	SYBR		Unkn		None	None	None	None
	H03	SYBR		Unkn		None	None	None	None
	H04	SYBR		Unkn		None	None	None	None
	H05	SYBR		Unkn		None	None	None	None
	H06	SYBR		Unkn		None	None	None	None
	H07	SYBR		Unkn		None	None	None	None
	H08	SYBR		Unkn		None	None	None	None
	H09	SYBR		Unkn		None	None	None	None
	H10	SYBR		Unkn		None	None	None	None
	H11	SYBR		Unkn		None	None	None	None
	H12	SYBR		Unkn		None	None	None	None

## Sheet: Run Information
File Name	admin_2022-03-21 14-55-21_BR008212.pcrd
Created By User	admin
Notes
ID
Run Started	03/21/2022 06:55:44 UTC
Run Ended	03/21/2022 08:41:29 UTC
Sample Vol	10
Lid Temp	105
Protocol File Name	1.prcl
Plate Setup File Name	2.pltd
Base Serial Number	BR008212
Optical Head Serial Number	788BR08065
CFX Manager Version	3.1.1517.0823.
