# Supplementary material for: Prognostic value of RNA methylation-related genes in gastric adenocarcinoma based on bioinformatics
Source: PeerJ. 2024 Feb 29;12:e16951. doi: 10.7717/peerj.16951 (PMC10909369; doi:10.7717/peerj.16951)
Supplement: Supplemental Information 31 [file peerj-12-16951-s031.xlsx]

## Sheet: SYBR
	Temperature	A1	A2	A3	A4	A5	A6	A7	A8	A9	A10	A11	A12	B1	B2	B3	B4	B5	B6	B7	B8	B9	B10	B11	B12	C1	C2	C3	C4	C5	C6	C7	C8	C9	C10	C11	C12	D1	D2	D3	D4	D5	D6	D7	D8	D9	D10	D11	D12
	65	15.4233	16.442	17.7762	17.6411	17.3898	19.9067	19.8148	19.6541	19.8388	19.2229	14.9453	10.8965	1.04184	0.0492922	0.536599	1.41571	13.942	10.0127	20.8506	3.99908	7.98645	-0.0300709	2.74866	0.154844	17.5331	15.6643	22.0022	18.3426	18.7887	20.5178	21.299	21.744	23.63	20.801	17.3866	16.8587	19.3678	15.7763	19.4546	17.34	14.8577	20.9714	24.3709	21.5162	20.4487	21.0197	19.7189	19.7604
	65.5	33.4172	35.6243	38.5152	38.2224	37.6779	43.1311	42.932	42.5838	42.984	41.6495	32.3814	23.609	2.25732	0.1068	1.16263	3.06738	30.2076	21.6943	45.1763	8.66467	17.304	-0.0651535	5.95544	0.335495	37.9884	33.9394	47.6715	39.7422	40.7088	44.4552	46.1477	47.1119	51.1984	45.0689	37.671	36.5273	41.9635	34.182	42.1517	37.57	32.1918	45.438	52.8035	46.6185	44.3056	45.5427	42.7244	42.8143
	66	30.8467	32.884	35.5525	35.2822	34.7796	39.8133	39.6295	39.3081	39.6776	38.4457	29.8905	21.7929	2.08368	0.0985844	1.0732	2.83143	27.8839	20.0255	41.7012	7.99815	15.9729	-0.0601417	5.49732	0.309688	35.0662	31.3286	44.0045	36.6851	37.5773	41.0356	42.5979	43.4879	47.2601	41.6021	34.7732	33.7175	38.7355	31.5526	38.9093	34.68	29.7155	41.9428	48.7417	43.0325	40.8975	42.0394	39.4379	39.5209
	66.5	30.8467	32.884	35.5525	35.2822	34.7796	39.8133	39.6295	39.3081	39.6776	38.4457	29.8905	21.7929	2.08368	0.0985844	1.0732	2.83143	27.8839	20.0255	41.7012	7.99815	15.9729	-0.0601417	5.49732	0.309688	35.0662	31.3286	44.0045	36.6851	37.5773	41.0356	42.5979	43.4879	47.2601	41.6021	34.7732	33.7175	38.7355	31.5526	38.9093	34.68	29.7155	41.9428	48.7417	43.0325	40.8975	42.0394	39.4379	39.5209
	67	30.8467	32.884	35.5525	35.2822	34.7796	39.8133	39.6295	39.3081	39.6776	38.4457	29.8905	21.7929	2.08368	0.0985844	1.0732	2.83143	27.8839	20.0255	41.7012	7.99815	15.9729	-0.0601417	5.49732	0.309688	35.0662	31.3286	44.0045	36.6851	37.5773	41.0356	42.5979	43.4879	47.2601	41.6021	34.7732	33.7175	38.7355	31.5526	38.9093	34.68	29.7155	41.9428	48.7417	43.0325	40.8975	42.0394	39.4379	39.5209
	67.5	30.489	32.6028	35.4614	35.1604	34.7167	39.7376	39.5531	39.1952	39.5859	38.3241	29.4481	20.9909	2.02142	0.0791364	1.05404	2.82279	27.1116	19.9789	40.739	8.00476	15.9481	-0.118536	5.37334	0.280384	34.8556	30.7864	44.072	36.2037	37.0882	40.9742	42.5482	43.4806	47.1782	41.0954	34.5491	33.361	38.6345	30.9779	38.9232	34.1783	29.1591	41.8778	48.7896	42.8928	40.8238	41.9142	39.0369	39.2584
	68	32.8948	34.5314	36.0821	35.987	35.0941	40.2774	40.0656	39.968	40.2355	39.1842	32.4052	26.2855	2.38359	0.187819	1.16903	2.84946	31.5079	20.2859	46.2181	7.92982	15.9907	0.295555	6.26393	0.411505	36.2932	34.3544	43.6438	39.3975	40.3354	41.4021	42.9224	43.4519	47.7215	44.3653	36.0396	35.7497	39.2868	34.72	38.8857	37.497	32.7701	42.3248	48.5001	43.8431	41.3121	42.7853	41.6977	41.0409
	68.5	36.0526	36.7266	36.7863	37.0885	35.9619	40.7138	40.7297	40.8971	40.8238	40.0124	36.5365	34.0953	3.38807	0.566659	1.45391	3.21172	42.6443	20.7156	60.3468	8.15595	16.8733	0.660807	7.01069	1.10384	37.9462	39.7413	42.8471	43.9745	44.9156	41.8455	43.1472	44.0109	48.5645	49.7416	38.066	39.0624	40.4702	40.6403	38.3252	42.2273	38.6277	42.8074	47.8187	45.041	41.9874	43.6215	45.5342	43.242
	69	36.5938	37.0002	37.1778	36.633	36.4599	40.7745	41.0203	40.8349	40.5777	39.6042	36.76	35.8554	3.46528	0.396496	1.42812	2.96348	56.5714	21.0225	76.6368	7.84601	19.0501	0.617621	6.54341	1.79052	38.4992	40.8074	42.7564	44.8768	46.2388	41.7902	42.5437	44.9243	48.3161	51.9527	38.9735	38.942	40.1112	42.5007	38.2917	43.9881	40.1801	43.0535	47.7762	44.8299	42.3305	44.1151	46.1449	43.5259
	69.5	36.6185	37.7431	37.4832	36.5105	36.377	40.6984	41.16	40.4321	41.0015	39.0651	35.8381	35.6695	3.08793	-0.0209854	1.48527	2.64206	75.365	21.2822	93.5671	7.42782	21.2296	0.657645	5.81706	2.02793	39.3889	40.5711	42.4664	44.9086	46.5073	41.7308	41.8506	45.0211	47.4893	52.5688	40.0958	38.4093	39.3975	42.7285	38.1952	44.8905	40.2609	42.8406	47.5555	44.9318	42.4582	44.2903	45.724	43.5521
	70	36.4859	38.0666	37.3979	36.7959	35.7546	40.1668	41.4886	40.2789	41.2071	38.9239	35.3779	35.2144	2.95609	-0.283562	1.43306	2.65656	98.3257	21.0763	107.7	7.77406	23.5234	0.239546	4.75143	2.3124	39.7185	40.8349	42.2811	45.2579	46.1968	41.7805	41.766	45.068	46.6958	51.511	40.7426	38.2109	39.1674	42.6299	37.6475	44.8738	40.5158	42.3746	46.9787	44.7801	42.4668	43.6076	45.3318	43.4504
	70.5	36.1207	37.0838	37.4134	36.7202	35.7891	40.1314	41.3473	40.3244	40.8052	38.9017	35.4968	34.4233	2.56808	-0.78666	1.37911	2.17993	122.449	20.6179	116.33	7.688	25.8209	-0.435628	3.9341	2.67204	40.1091	40.9829	42.7935	45.371	46.1838	41.7699	41.4045	45.6897	45.9372	48.6419	40.7738	37.2168	38.8855	42.3921	37.8428	45.0341	40.7844	42.162	47.571	43.8153	42.931	43.3016	44.9732	43.6316
	71	35.7349	36.3028	37.3294	36.96	35.9788	40.6016	40.9893	40.2798	40.6096	39.0125	35.7654	34.1658	2.14705	-1.23538	1.59522	1.52937	143.1	20.3993	118.108	7.34424	25.7013	-0.729025	3.54384	2.30567	39.8911	40.9502	42.7169	45.1367	46.2542	41.5616	41.3037	45.3268	45.2843	45.412	41.2304	36.5727	38.2086	41.9795	38.2347	45.8013	41.3813	42.191	48.2035	43.3023	43.2806	43.3797	44.9537	43.7361
	71.5	35.5018	36.2423	36.7393	37.6796	35.3852	40.6871	41.0102	40.6526	40.9153	39.5223	36.2302	35.5407	2.53322	-1.16026	1.88494	1.61676	154.531	20.1026	113.091	8.1788	23.2381	-0.896941	3.8922	1.20485	38.8054	41.1162	41.9682	45.0761	46.0087	41.7775	41.9103	43.9218	45.0503	43.2051	41.326	36.8246	37.8478	41.2411	37.7807	45.8114	42.1911	42.1728	47.7421	43.6193	42.8734	42.8434	45.2391	43.5601
	72	35.0308	35.6553	36.0567	37.7698	35.06	40.5664	40.8239	41.2185	40.5582	39.9477	36.8665	35.9738	3.26804	-1.25396	2.50218	1.68782	153.469	19.5816	102.75	9.50473	20.9658	-1.0612	4.41632	1.13988	37.986	41.1839	41.6834	44.8346	45.7644	41.8865	42.2876	43.6572	45.1427	41.4136	40.9753	37.2039	37.4973	40.4301	37.1244	44.9969	42.5524	42.6814	47.4282	43.3769	42.5092	42.7388	45.3185	44.0378
	72.5	34.4132	34.9397	35.467	37.6128	35.2084	40.7257	40.2699	40.5978	40.2314	40.1813	36.9804	35.2167	3.76201	-1.45244	3.05936	1.41656	140.322	19.2523	90.0898	11.0103	18.7272	-0.953325	4.6097	1.21384	36.5194	40.6512	41.6516	44.6215	45.4945	41.3358	42.2972	43.4693	45.6962	40.3844	41.5604	37.9302	36.8875	39.6878	36.8178	44.8175	42.4117	43.2164	47.3459	42.8895	42.1581	43.4178	45.6739	44.0708
	73	34.2961	34.9558	35.0552	37.7224	35.3477	40.8464	39.9285	39.6952	40.4429	40.1517	36.489	35.0051	4.72729	-1.18388	3.21308	1.53031	117.425	19.3244	76.746	13.8476	16.3997	-0.870939	4.73858	0.388064	34.4489	40.3341	41.395	44.6312	45.2539	41.1703	42.4892	42.5539	46.3503	40.8084	42.6721	39.2148	36.0343	39.5656	36.3138	44.6858	42.1484	43.1525	46.0225	42.7697	41.5266	43.7017	46.0149	44.0976
	73.5	33.9734	35.1287	34.5778	37.6716	35.5869	41.31	39.637	39.4658	40.6968	40.3852	35.8766	34.9255	6.29215	-0.8656	3.37022	1.79245	89.531	19.9045	62.4151	17.4988	16.1376	-0.678056	4.85421	0.521554	33.7021	40.9411	41.6557	44.6096	45.4186	41.5734	42.2605	42.6816	46.4142	42.0422	43.425	40.0181	35.1532	39.7706	36.0748	44.1267	41.6044	43.1541	44.6053	42.2686	40.9272	44.3704	46.1857	44.8981
	74	33.4127	34.5824	33.9757	37.9722	36.7961	42.5089	39.2684	38.9516	40.2034	40.5353	35.2213	34.1481	8.32458	-0.630105	4.47612	1.54865	62.5438	22.3407	47.8238	20.3297	18.4549	-0.388033	4.64906	1.71132	33.8024	41.2615	41.8899	44.8853	45.638	41.8288	41.5861	43.3104	46.2703	43.0287	44.7286	40.6333	34.7931	40.2594	36.1724	44.0519	41.2417	42.8683	44.1162	41.2357	40.9805	45.3742	46.3886	45.4178
	74.5	33.6154	34.0033	34.0057	38.9201	38.248	44.0114	39.4094	38.578	39.9654	40.7661	34.9916	34.0872	10.5583	-0.284124	5.8886	1.14465	40.4067	28.7312	35.0738	21.7742	23.0482	-0.515505	4.25806	1.72351	33.6798	41.0857	41.2938	45.8869	46.0872	42.8923	40.9885	43.3493	46.399	43.3764	46.816	41.2658	34.5682	41.1471	36.3213	44.668	41.265	41.8117	43.4191	40.1136	40.9136	46.3764	46.9422	45.3941
	75	33.8018	34.1422	34.0287	40.1215	39.4139	45.0873	41.2076	39.9473	41.7247	41.387	35.9737	35.228	12.6694	-0.130977	6.93763	1.64566	24.1531	41.2885	24.8123	21.6163	30.2005	-0.70844	4.49354	1.12637	34.7428	41.2344	40.6515	46.7102	46.9188	45.0669	42.446	45.2106	48.7568	43.8835	49.0437	41.5864	34.3891	41.3615	36.09	44.7001	41.5147	40.7829	47.6065	43.2286	44.0226	47.8328	47.5823	45.9065
	75.5	33.5472	34.6418	33.8302	40.8419	40.1697	45.8002	58.5872	54.74	57.4694	42.6573	37.2715	36.3344	14.1898	-0.427437	8.22083	1.88768	13.6221	58.7218	17.1393	19.417	38.9221	-0.568028	4.76989	1.74017	36.6087	41.2382	40.0835	46.9918	47.4662	46.5665	61.0877	64.5884	69.919	44.3114	50.5496	42.2995	34.7614	40.9416	35.654	44.3336	41.6753	40.7894	73.7316	66.0064	66.189	49.7441	48.7334	46.734
	76	33.8346	34.6704	34.0411	41.5045	40.5014	45.7895	100.218	93.0833	97.1903	43.7043	38.232	36.871	14.0803	-0.589417	9.37991	1.39405	7.42169	76.7258	12.6362	15.4118	46.2935	-0.786423	4.48846	1.78537	37.7522	40.0311	39.4683	47.5001	47.4287	47.5006	106.634	112.715	121.766	43.9147	51.7158	43.6603	35.3681	40.5284	34.9826	44.4129	41.7768	40.3185	129.958	117.419	116.105	51.4261	50.2848	47.2385
	76.5	34.4041	34.5869	34.5375	41.5031	40.0074	44.5978	155.241	148.286	152.031	44.6591	39.6491	37.2844	11.573	-1.01445	8.75917	1.16137	3.73175	90.8332	11.1193	10.9854	50.8984	-1.26467	4.63477	1.08498	38.2973	39.1123	38.9887	47.182	47.1407	48.2673	174.846	186.047	198.737	43.8679	52.9859	44.8102	35.1927	39.7533	34.1037	44.3494	41.7846	39.6015	211.26	193.317	189.435	53.5799	51.5068	48.4114
	77	34.5362	34.9336	34.1262	40.4858	39.2209	43.001	215.766	210.289	212.027	46.5242	40.7892	38.1489	8.25735	-1.04816	6.81079	1.52658	1.59661	96.7483	11.1512	7.64409	51.3073	-1.18103	5.08723	1.39275	38.915	38.7831	38.3667	45.7244	46.9733	47.5635	255.881	273.738	289.766	45.5351	53.5639	45.6305	34.9824	38.6799	33.4949	44.042	41.4267	39.9126	307.363	284.593	277.367	56.0212	53.1526	49.8949
	77.5	35.1689	34.9039	34.0553	39.2852	38.7634	41.933	278.099	274.204	270.942	48.4961	40.9131	39.0367	5.16898	-0.731174	5.23349	0.977743	0.585854	89.2633	11.2945	5.54305	45.8914	-0.733269	4.83347	1.85959	39.0808	38.1402	37.851	44.9952	46.4275	45.764	334.131	360.115	377.409	47.7991	53.4885	46.9275	34.8256	38.5811	33.926	44.3936	41.044	41.0303	395.478	370.125	360.592	59.4483	56.6978	52.299
	78	35.7533	34.3133	34.6127	38.8282	38.0643	40.9337	311.155	313.278	301.937	50.3889	41.8827	40.3308	2.34969	-0.512613	3.44952	0.573019	-0.423136	70.4939	11.1891	4.41441	36.9991	-0.681394	4.60727	1.68072	38.8638	37.9725	37.9845	44.807	45.5531	44.2031	378.218	410.517	425.49	50.2068	54.9013	47.9261	34.4101	38.896	34.833	45.3609	41.2816	42.0988	439.33	415.316	404.762	67.0021	64.0978	58.3631
	78.5	35.5	34.2311	34.85	38.6423	37.6533	40.8931	295.408	304.691	284.568	57.3159	47.2356	45.2217	0.193521	-0.597016	1.57806	1.16067	-1.05827	48.3997	10.6081	3.98339	28.2493	-0.96116	5.34824	1.80307	38.916	39.1191	38.1154	44.4136	45.6265	42.6972	368.305	401.361	412.08	54.9651	58.9273	49.3495	33.9672	39.3452	35.4965	46.3651	42.0162	44.5005	422.518	402.735	392.052	83.0093	79.6599	72.3764
	79	35.7416	35.5728	36.0688	39.2399	37.7396	42.2756	252.426	263.98	237.962	82.2349	67.065	62.6469	-0.663335	-0.355112	0.321968	1.65956	-0.602824	27.9496	9.22308	4.22377	19.8797	-0.553216	5.88533	1.78959	39.9177	41.2152	39.8058	45.1431	46.4468	41.2507	311.555	340.776	346.933	69.1777	72.1001	60.4496	34.1966	40.6412	37.8661	47.6357	43.129	48.1437	353.901	339.953	330.477	116.319	113.665	103.089
	79.5	46.066	47.8689	50.313	40.342	37.6172	43.4992	197.435	209.907	181.577	129.342	107.411	96.3761	-0.884654	-0.623907	-0.318516	1.78845	-0.142253	12.081	6.98687	4.26946	12.3784	-0.351571	6.91232	1.55427	50.7212	54.5353	57.1468	46.0055	46.6442	40.9667	228.431	250.3	251.554	100.955	102.013	88.0069	39.1497	53.9326	55.8526	49.1544	44.2416	51.0476	255.043	246.531	239.573	166.237	168.429	153.889
	80	78.961	85.1515	90.3916	40.9324	37.2788	44.062	136.126	149.25	125.101	187.366	158.565	137.571	-1.13841	-1.07102	-0.694562	1.96474	-0.0455294	3.51675	4.56074	3.60302	7.83964	-0.771752	9.18489	1.92274	86.1382	93.4877	104.096	44.8029	47.1357	41.3571	143.214	155.699	154.199	142.642	144.223	122.004	63.7772	93.5288	101.002	50.3688	45.0644	53.2495	156.136	151.574	147.396	218.122	229.407	211.258
	80.5	129.353	143.805	150.209	41.0109	37.5745	44.9776	91.8368	99.7835	85.9015	244.729	208.917	179.627	-1.42662	-1.17427	-0.827854	1.95713	0.560528	0.804121	2.51337	2.56194	4.83631	-0.630002	11.0844	2.48807	143.137	152.438	173.436	43.0928	48.4802	42.2327	74.4854	79.8543	78.0978	182.388	188.106	154.004	112.161	155.176	164.591	51.4106	45.9037	55.1784	80.3302	77.5877	75.6457	262.982	280.958	260.325
	81	183.954	208.659	215.195	41.2949	38.5541	45.1909	74.5894	74.9843	72.3359	290.232	249.844	217.192	-1.38706	-1.28201	-0.859754	1.65624	1.21945	0.151493	1.38264	1.71622	2.08957	-0.273169	12.2355	2.7015	204.91	215.917	248.825	42.3266	49.3216	44.3938	33.496	35.4413	33.2326	215.963	226.571	182.525	169.67	223.847	232.694	52.7068	46.6682	56.3589	35.4613	33.0886	32.6777	291.479	313.275	293.183
	81.5	237.273	270.683	276.363	42.1469	40.8222	45.2442	69.5925	64.3051	72.5904	298.142	259.785	229.703	-1.12826	-1.21752	-0.500708	1.32697	1.18288	0.55533	0.578815	1.03022	0.515136	-0.781038	13.0768	2.8358	263.765	275.599	320.084	42.239	50.4235	48.0236	17.5306	17.8045	14.6193	228.045	244.344	190.828	226.698	290.739	296.95	54.6954	47.9739	57.8418	16.8296	14.3922	14.9913	283.077	308.378	294.256
	82	269.482	308.977	311.183	46.3629	46.7712	50.5671	69.8153	57.8893	76.0456	257.299	226.9	206.428	-1.00117	-1.15751	-0.388803	1.07012	0.790182	0.87693	0.322695	0.0565074	-0.0755302	-1.20546	12.0949	2.93499	301.932	310.606	360.269	46.8545	56.569	55.7372	15.1469	15.4956	11.8981	200.398	227.161	165.79	273.364	332.16	328.887	61.0797	53.615	65.7164	13.8774	11.285	12.1231	239.767	259.044	255.532
	82.5	255.053	295.615	293.073	62.9988	63.9959	70.0241	70.1303	52.9548	74.3749	191.655	170.698	165.081	-0.940294	-1.04595	-0.74154	1.48796	0.737984	0.966552	0.609923	-0.672452	-0.372956	-1.65118	8.91221	2.3395	289.355	293.638	339.304	66.8284	76.174	76.1151	14.8729	16.5811	11.8977	149.021	183.274	125.988	279.784	318.668	303.231	80.4491	70.7227	87.999	14.2037	11.7745	11.586	187.352	189.662	199.19
	83	206.785	238.624	232.883	97.0851	97.6299	107.248	60.9109	45.2817	63.3909	124.228	112.222	118.877	-0.977034	-0.93969	-0.800846	2.3115	1.06868	1.44638	0.500589	-0.469252	-0.449303	-2.43552	6.02612	0.811554	233.243	234.287	270.006	106.419	113.848	113.032	15.0351	16.8131	10.6357	98.398	130.341	92.8296	238.004	259.09	239.181	115.537	100.931	124.689	13.9706	11.6962	10.3792	135.165	124.346	145.999
	83.5	153.617	167.822	161.055	141.464	140.874	155.075	45.7516	33.848	48.5774	63.4163	59.0542	70.5384	-0.94447	-0.93562	-1.20759	2.83043	1.16643	2.31197	-0.0351191	-0.34719	-0.518792	-2.70467	3.30753	-0.166626	167.397	163.369	186.901	156.978	163.27	158.222	13.8601	14.8556	9.28669	52.2612	79.1444	67.4504	178.159	183.668	166.149	159.006	137.622	168.122	13.7347	11.3327	9.78294	88.343	69.7827	99.0902
	84	102.286	98.1602	92.4387	186.689	183.984	203.602	32.4361	22.9242	34.4179	22.2052	21.5159	33.7134	-1.07274	-1.31628	-1.70801	3.47075	1.13238	2.31388	-0.0120155	-0.872548	-0.825763	-2.48343	0.513192	-0.593182	104.595	95.4957	106.669	207.902	213.779	202.918	10.6789	11.6111	8.65871	17.4723	38.2482	53.3231	118.186	108.938	95.435	204.044	175.436	212.335	14.1969	11.1148	9.28263	59.718	33.3786	62.9296
	84.5	61.3275	40.9879	37.4925	224.73	219.123	241.656	19.8907	13.9837	21.7757	7.01039	6.17182	15.7491	-1.19639	-1.15576	-1.3669	3.91944	1.53751	1.99064	-0.249753	-1.07908	-1.1815	-2.1891	-1.00993	-1.43954	52.4662	40.9275	42.4355	249.328	254.149	238.329	7.77439	8.56435	8.50902	3.48305	15.0978	55.3791	63.6101	47.549	41.2226	241.979	207.035	245.901	15.324	11.433	8.807	46.9127	19.5089	43.312
	85	43.245	10.3994	9.23229	237.93	230.428	251.062	10.4156	7.2072	13.5983	4.69874	3.35422	7.38747	-1.03088	-1.28733	-1.00947	3.39087	1.58722	1.66375	-0.909798	-1.17946	-1.39118	-1.38774	-1.26085	-1.78772	26.2972	12.9063	9.19675	262.637	265.641	246.694	5.73106	5.92118	7.96282	2.8172	6.18685	64.0607	29.2893	14.2384	16.9123	253.763	216.276	250.053	17.0102	12.0462	8.93569	37.2549	16.9796	32.9744
	85.5	39.8881	2.36929	3.03514	215.09	206.818	222.965	7.13523	3.38015	10.4739	3.81759	2.13797	2.27857	-1.00322	-1.51048	-1.38949	2.56184	0.73403	0.997108	-0.963992	-1.94811	-1.31668	-0.835735	-1.57416	-1.0149	20.8529	6.36308	1.45604	236.055	238.187	219.299	3.87696	4.10743	7.39521	2.95976	3.61638	62.8002	18.8415	4.72635	11.5697	231.796	197.373	222.793	19.31	13.0464	9.57888	28.7	14.8311	23.3562
	86	34.3113	1.58176	3.10413	168.56	160.276	172.355	6.96307	1.90222	9.23417	3.13764	1.01403	0.773625	-1.19045	-1.23999	-1.23333	1.86268	0.0700321	0.0676317	-0.984512	-2.45963	-1.10204	-0.967343	-1.68068	-0.939568	18.3232	5.42523	1.40983	183.178	184.778	170.711	3.09026	3.17108	7.05888	2.19885	2.33441	50.2415	15.919	3.73976	9.77354	190.816	163.668	179.841	21.3916	13.7168	9.67046	21.7233	11.9805	15.1116
	86.5	25.0551	1.42194	2.51844	115.535	108.192	117.128	5.92148	1.24923	7.86133	2.61654	0.956165	0.551491	-0.940291	-1.07469	-1.14588	0.946694	-0.352032	-0.63609	-1.38909	-2.18893	-0.9683	-0.719027	-1.21159	-1.06043	14.1494	4.25263	0.94203	124.02	124.312	117.031	3.42667	2.77675	6.19033	1.62584	1.3604	35.4475	12.3216	3.04086	7.85732	143.456	125.341	131.023	22.2623	13.752	9.02889	14.6583	9.5844	10.242
	87	16.0979	1.47395	1.89616	65.3733	59.8799	66.7957	4.89001	1.07366	5.89868	1.38915	0.461346	0.362973	-0.80614	-1.29012	-1.61708	-0.0258391	-0.861035	-1.10893	-1.36363	-1.85666	-1.01289	-0.475868	-1.12545	-0.837659	9.71377	3.21748	0.817455	69.1572	68.4326	66.9717	3.25097	2.68313	4.51449	1.59036	0.942531	21.5592	8.93828	2.56892	5.84371	95.4853	86.3533	83.8607	21.3712	12.6339	8.24731	8.88341	7.23698	7.79157
	87.5	8.03068	1.63948	1.23172	27.7356	24.0869	30.9027	3.53975	0.618494	3.61225	0.507707	-0.491211	0.291595	-1.18921	-1.21754	-1.80713	-0.498657	-1.15324	-1.40431	-0.879325	-1.6264	-1.38977	-0.643813	-1.40069	-0.861868	5.29181	1.81872	0.913084	28.0691	27.8121	31.1189	2.9208	2.3636	3.72762	1.05655	0.806661	9.01272	5.71953	2.18653	3.20663	58.526	56.5351	50.4446	18.767	10.171	7.03185	5.2798	5.11922	5.68309
	88	2.03925	1.42118	0.369221	8.92564	6.61945	14.3574	2.30832	0.0678995	2.04773	0.279095	-0.699178	0.36204	-1.25391	-1.1126	-1.40082	-0.894855	-0.841481	-1.28305	-0.746208	-0.957656	-1.7045	-0.648595	-1.4734	-1.15712	2.21427	0.932571	0.786752	7.6755	7.49529	13.7628	2.06076	1.61487	3.78804	0.205872	0.278882	1.32284	3.10213	1.58804	1.84722	38.949	40.771	33.3692	15.2418	7.25786	5.26689	3.1643	3.35906	3.91705
	88.5	-0.706005	1.02378	-0.143727	3.19542	1.70288	9.52825	1.50849	0.133631	1.15141	0.200252	-0.628548	0.541217	-1.22485	-1.33604	-1.11475	-1.23578	-0.645373	-1.30813	-0.752961	-0.0975844	-1.79916	0.0211618	-1.38946	-1.23449	0.900316	1.23555	0.924897	2.08368	1.15037	7.69368	0.916683	1.17314	3.46376	-0.0915476	-0.413303	-0.230254	2.02242	1.19482	1.95003	28.3479	31.7558	24.0272	11.2056	4.60065	3.63861	1.33182	1.99766	1.99173
	89	-0.718834	0.559199	-0.384028	1.73742	0.529689	7.40597	1.26425	0.119619	0.30108	-0.263459	-1.40265	0.0681525	-1.58606	-1.37009	-1.2161	-1.40195	-0.528151	-1.2505	-0.584121	-0.154222	-1.91671	-0.2119	-1.62756	-1.0854	0.265944	1.16909	1.33437	0.744581	0.0707529	5.85028	0.199738	0.917745	3.3987	-0.464283	-0.43349	-0.106637	1.76333	1.1179	1.50786	19.5072	23.0368	16.8233	7.5496	2.40055	2.47987	-0.0310794	1.12549	0.433177
	89.5	-0.436039	-0.183311	-0.476184	1.15886	0.134634	5.35037	1.11506	-0.0674619	0.140802	-0.379473	-1.40842	-0.137897	-1.72897	-1.39392	-1.20943	-1.34102	-0.509162	-0.724033	-0.869948	-0.163956	-1.85459	-1.00862	-1.38392	-1.0911	0.0971473	0.477211	1.14415	-0.108651	-0.365779	5.08425	-0.492429	0.23086	3.39686	-1.23947	-0.269385	-0.38764	1.46486	0.747602	1.38107	12.8286	15.8952	11.4867	4.74141	1.21904	1.51413	-0.496163	0.774641	-0.597856
	90	-0.253079	-0.793166	-0.224494	1.02389	-0.147825	3.60043	0.96816	0.191612	0.361546	-0.0929154	-0.611417	0.450032	-1.54678	-1.29794	-1.05182	-1.2718	-0.632429	-0.307395	-1.61205	0.225552	-1.31331	-1.33431	-0.452001	-1.19482	0.0200338	0.317156	1.15298	-0.249647	-0.720967	3.90604	-1.12534	-0.299602	2.63726	-1.56659	-0.585846	-0.655473	1.38459	0.402121	2.03183	8.42898	10.6532	7.76639	2.62015	0.843552	0.839054	-0.641277	0.39686	-0.963736
	90.5	-0.414304	-0.938964	-0.0153789	0.430735	-0.694581	1.99175	0.698494	0.316403	0.308806	0.0119294	-0.454158	0.759032	-1.32854	-1.39342	-1.17579	-1.19463	-1.02523	-0.699	-2.08322	-0.287246	-0.874018	-1.72851	0.000662431	-1.36451	-0.186168	0.418937	1.14413	-0.536897	-0.957201	3.29267	-0.872397	-0.345937	1.7558	-1.62679	-0.64437	-0.414176	1.19704	0.246838	1.34151	4.34755	5.76054	4.20635	0.967435	0.586408	0.557959	-0.951613	-0.191401	-0.972677
	91	-0.550595	-0.892948	-0.0391075	-0.364296	-1.22321	0.514296	0.295426	-0.0239158	0.275508	0.048494	-0.491626	0.24675	-1.20191	-1.52781	-1.31307	-1.11132	-1.31557	-0.929627	-2.01708	-1.29097	-0.95825	-2.50771	-0.102625	-1.24842	-0.623903	0.031601	0.462681	-1.29129	-0.998042	3.12283	-0.386092	-0.608024	1.26798	-1.41191	-0.793331	-0.27874	0.623702	0.0131361	0.0400579	0.938987	2.11639	1.29872	0.288428	0.693944	0.0697085	-0.923757	-0.360401	-0.716358
	91.5	-0.840601	-0.680049	-0.269078	-0.627625	-1.11669	-0.412505	-0.284232	-0.175297	0.597621	0.120988	-0.201767	0.105582	-1.15664	-1.53187	-0.956035	-1.21705	-1.31135	-0.771059	-1.98116	-1.33842	-0.898045	-2.54468	-0.215111	-1.56958	-0.87136	0.0239062	-0.237145	-1.62963	-1.0219	2.5941	-0.342264	-0.724241	1.04865	-0.943552	-1.00992	-0.655932	0.396243	-0.117603	-0.0407437	-0.227114	0.615595	0.48183	0.374909	0.832713	-0.486257	-0.461568	-0.705821	-0.25486
	92	-0.774003	-0.139085	-0.36316	-0.545824	-0.998955	-0.555167	-1.03161	-0.685911	0.324375	-0.147247	-0.671777	-0.417744	-0.962099	-1.48858	-0.811436	-1.25036	-1.21512	-1.28094	-1.8176	-1.65555	-0.511888	-1.97682	-0.8086	-1.79837	-0.885131	0.646827	-0.664354	-1.11349	-0.881616	2.20871	0.098171	-0.507714	1.17285	-0.623788	-1.38162	-0.695365	0.505296	-0.157726	-0.280802	-0.377605	-0.0840415	0.349964	0.314337	0.582246	-0.736156	-0.300004	-1.24935	0.215048
	92.5	-0.553611	-0.177886	-0.396258	-0.517278	-0.902135	-0.273759	-1.192	-1.37137	0.0120668	-0.221609	-0.94306	-0.96165	-0.905556	-1.71821	-1.0779	-1.00679	-1.26514	-1.98966	-1.07932	-2.48706	-0.97793	-1.94747	-1.76269	-1.8814	-1.03788	0.888298	-1.11658	-0.832901	-0.682569	1.85757	0.41168	-0.619522	1.46325	-0.399189	-1.47091	-0.584954	0.252215	-0.101859	-1.07647	-0.809101	-1.13972	-0.274934	0.374887	-0.00428427	-0.786797	-0.361162	-1.65826	-0.098339
	93	-0.462167	-0.3691	-0.353152	-0.326583	-0.729785	-0.194497	-1.53321	-1.44867	-0.223636	-0.631967	-1.04422	-1.32577	-0.95999	-1.74603	-1.45263	-0.843496	-1.08743	-1.45136	-0.772422	-2.52642	-1.6946	-1.67553	-2.33634	-1.95617	-0.914798	0.760758	-1.33068	-0.839123	-0.313858	1.11285	0.31455	-0.692121	1.59288	-0.500161	-1.1738	-1.35095	0.371023	-0.225969	-0.772298	-0.623866	-2.21161	-0.717638	0.739085	-0.199648	-0.848226	-0.45533	-1.46308	-0.84471
	93.5	-0.382793	-0.292501	-0.0563666	-0.362574	-0.345845	0.137365	-1.52041	-1.07416	-0.586114	-0.607613	-0.148211	0.0105244	-0.920375	-1.81578	-2.01615	-0.159409	-1.41742	-1.41776	-0.221028	-2.32578	-2.43078	-1.77035	-2.10372	-2.57418	-0.43523	0.18973	-1.15641	-0.752483	0.249031	0.132889	0.350715	-0.117375	0.569358	-0.268002	-1.34726	-1.47254	0.0807006	-0.343978	-0.232759	0.0489272	-3.97834	-0.284952	0.543258	-1.07773	-0.479886	-0.731039	-1.52554	-1.28493
	94	-0.208157	-0.630743	0.217152	-0.421324	-0.104587	0.638894	-1.27558	-0.879241	-0.724474	-0.218974	0.4828	0.968611	-0.899879	-2.09954	-2.49316	0.384105	-1.81326	-1.85529	0.204246	-2.53335	-3.17883	-2.00974	-2.0875	-2.76474	-0.249108	-0.0923943	-1.07713	-0.588611	0.419784	-0.35595	0.30336	-0.00608232	-0.0296501	-0.312739	-1.31582	-1.4096	-0.171334	-0.54449	-0.321175	0.327067	-5.03042	-0.481091	0.13935	-1.73282	-0.022033	-0.840463	-1.77119	-1.9253
	94.5	-0.726761	-0.921329	0.691706	-1.34161	0.344457	1.1351	-0.391445	0.00417624	-0.623441	1.28563	3.51648	4.47057	-1.15298	-2.74241	-3.33779	1.85523	-3.29416	-2.89507	1.77495	-2.70768	-5.19304	-3.38146	-1.02066	-3.95762	-0.111	-1.73313	-1.01815	-1.2783	1.23754	-1.49428	0.498559	0.969561	-2.75893	0.958495	-2.51946	-0.425153	-1.83916	-0.74448	-0.314161	0.800626	-7.71518	0.62332	-0.31466	-3.46092	0.499531	-1.54995	-1.91101	-2.71064
	95	-0.634472	-0.407339	0.483947	-1.12694	0.462653	0.677258	0.280533	0.487617	-0.093937	1.38705	3.16721	3.8218	-0.62712	-1.52309	-1.74732	1.51986	-2.1778	-1.86647	1.55081	-1.08461	-3.12108	-2.13981	0.232875	-2.38615	0.0519097	-1.58014	-0.434949	-0.927476	0.921307	-1.08898	0.33481	1.10687	-2.64154	1.20111	-1.75969	0.385344	-1.68512	-0.431008	-0.0601837	0.582446	-4.55926	1.05161	-0.290771	-2.33773	0.412992	-1.01392	-0.943125	-1.38633
[truncated: 48 more columns]

## Sheet: Run Information
File Name	admin_2022-03-21 14-55-21_BR008212.pcrd
Created By User	admin
Notes
ID
Run Started	03/21/2022 06:55:44 UTC
Run Ended	03/21/2022 08:41:29 UTC
Sample Vol	10
Lid Temp	105
Protocol File Name	1.prcl
Plate Setup File Name	2.pltd
Base Serial Number	BR008212
Optical Head Serial Number	788BR08065
CFX Manager Version	3.1.1517.0823.
